# Supplementary material for: Improved reannotations of Aegilops umbellulata (PI 554389) genome and transcriptomics data provide candidates for leaf rust resistance for wheat improvement
Source: Sci Rep. 2025 Dec 29;15:44930. doi: 10.1038/s41598-025-29241-6 (PMC12749518; doi:10.1038/s41598-025-29241-6)
Supplement: Supplementary file 1 — Supplementary Material 1 [file 41598_2025_29241_MOESM1_ESM.xlsx]

## Sheet: Title Sheet
Table S13: Gene set enrichment analysis of up- and down-regulated DEGs.
Sheet name
U890_vs_U170_Up
U890_vs_U170_Down
U89I24_vs_U17I24_Up
U89I24_vs_U17I24_Down
U89I6_vs_U17I6_Up
U89I6_vs_U17I6_Down
U89I72_vs_U17I72_Up
U89I72_vs_U17I72_Down

## Sheet: U890_vs_U170_Up
ONTOLOGY	ID	Description	setSize	enrichmentScore	NES	pvalue	p.adjust	qvalue	rank	leading_edge	core_enrichment	CoreGeneCount	GeneRatio
MF	GO:0016614	oxidoreductase activity, acting on CH-OH group of donors	12	-0.736505	-2.67675	6.27831e-06	0.0016512	0.00163567	1702	tags=100%, list=27%, signal=74%	AeUmb.PI554389.v2.2U.G0831800/AeUmb.PI554389.v2.2U.G0586800/AeUmb.PI554389.v2.6U.G0039300/AeUmb.PI554389.v2.1U.G0532400/AeUmb.PI554389.v2.2U.G0362900/AeUmb.PI554389.v2.2U.G0304100/AeUmb.PI554389.v2.5U.G0676100/AeUmb.PI554389.v2.6U.G0547500/AeUmb.PI554389.v2.2U.G0832300/AeUmb.PI554389.v2.7U.G0309900/AeUmb.PI554389.v2.6U.G0765200	11	0.916667
MF	GO:0016616	oxidoreductase activity, acting on the CH-OH group of donors, NAD or NADP as acceptor	12	-0.736505	-2.67675	6.27831e-06	0.0016512	0.00163567	1702	tags=100%, list=27%, signal=74%	AeUmb.PI554389.v2.2U.G0831800/AeUmb.PI554389.v2.2U.G0586800/AeUmb.PI554389.v2.6U.G0039300/AeUmb.PI554389.v2.1U.G0532400/AeUmb.PI554389.v2.2U.G0362900/AeUmb.PI554389.v2.2U.G0304100/AeUmb.PI554389.v2.5U.G0676100/AeUmb.PI554389.v2.6U.G0547500/AeUmb.PI554389.v2.2U.G0832300/AeUmb.PI554389.v2.7U.G0309900/AeUmb.PI554389.v2.6U.G0765200	11	0.916667
BP	GO:0009451	RNA modification	26	-0.404941	-2.01628	0.000175899	0.030841	0.0305509	3833	tags=100%, list=60%, signal=40%	AeUmb.PI554389.v2.4U.G0867900/AeUmb.PI554389.v2.3U.G0349000/AeUmb.PI554389.v2.5U.G0510200/AeUmb.PI554389.v2.6U.G0099600/AeUmb.PI554389.v2.6U.G0026800/AeUmb.PI554389.v2.3U.G0185700/AeUmb.PI554389.v2.7U.G0332400/AeUmb.PI554389.v2.3U.G0665400/AeUmb.PI554389.v2.4U.G0516600/AeUmb.PI554389.v2.7U.G0501100/AeUmb.PI554389.v2.5U.G0819300/AeUmb.PI554389.v2.4U.G0407400/AeUmb.PI554389.v2.2U.G0036900/AeUmb.PI5…	25	0.961538

## Sheet: U890_vs_U170_Down
ONTOLOGY	ID	Description	setSize	enrichmentScore	NES	pvalue	p.adjust	qvalue	rank	leading_edge	core_enrichment	CoreGeneCount	GeneRatio
BP	GO:0009058	biosynthetic process	447	0.394638	1.49939	1e-10	1.79333e-08	9.82456e-09	2332	tags=70%, list=49%, signal=39%	AeUmb.PI554389.v2.5U.G0314300/AeUmb.PI554389.v2.7U.G0066800/AeUmb.PI554389.v2.6U.G0591400/AeUmb.PI554389.v2.5U.G0541400/AeUmb.PI554389.v2.2U.G0319500/AeUmb.PI554389.v2.4U.G1018800/AeUmb.PI554389.v2.3U.G0693800/AeUmb.PI554389.v2.1U.G0269200/AeUmb.PI554389.v2.2U.G0103300/AeUmb.PI554389.v2.4U.G0611700/AeUmb.PI554389.v2.4U.G0961100/AeUmb.PI554389.v2.1U.G0284300/AeUmb.PI554389.v2.1U.G0255100/AeUmb.PI5…	311	0.695749
BP	GO:0044249	cellular biosynthetic process	424	0.395138	1.49879	1e-10	1.79333e-08	9.82456e-09	2332	tags=70%, list=49%, signal=39%	AeUmb.PI554389.v2.5U.G0314300/AeUmb.PI554389.v2.7U.G0066800/AeUmb.PI554389.v2.6U.G0591400/AeUmb.PI554389.v2.5U.G0541400/AeUmb.PI554389.v2.2U.G0319500/AeUmb.PI554389.v2.4U.G1018800/AeUmb.PI554389.v2.3U.G0693800/AeUmb.PI554389.v2.1U.G0269200/AeUmb.PI554389.v2.2U.G0103300/AeUmb.PI554389.v2.4U.G0611700/AeUmb.PI554389.v2.4U.G0961100/AeUmb.PI554389.v2.1U.G0284300/AeUmb.PI554389.v2.1U.G0255100/AeUmb.PI5…	296	0.698113
BP	GO:1901576	organic substance biosynthetic process	430	0.394706	1.4979	1e-10	1.79333e-08	9.82456e-09	2552	tags=76%, list=53%, signal=39%	AeUmb.PI554389.v2.5U.G0314300/AeUmb.PI554389.v2.7U.G0066800/AeUmb.PI554389.v2.6U.G0591400/AeUmb.PI554389.v2.5U.G0541400/AeUmb.PI554389.v2.2U.G0319500/AeUmb.PI554389.v2.4U.G1018800/AeUmb.PI554389.v2.3U.G0693800/AeUmb.PI554389.v2.1U.G0269200/AeUmb.PI554389.v2.2U.G0103300/AeUmb.PI554389.v2.4U.G0611700/AeUmb.PI554389.v2.4U.G0961100/AeUmb.PI554389.v2.1U.G0284300/AeUmb.PI554389.v2.1U.G0255100/AeUmb.PI5…	325	0.755814
BP	GO:0044281	small molecule metabolic process	118	0.472074	1.68898	8.86129e-08	1.19184e-05	6.52937e-06	1811	tags=70%, list=38%, signal=45%	AeUmb.PI554389.v2.7U.G0273700/AeUmb.PI554389.v2.5U.G0541400/AeUmb.PI554389.v2.5U.G0260600/AeUmb.PI554389.v2.3U.G0596600/AeUmb.PI554389.v2.4U.G0915500/AeUmb.PI554389.v2.5U.G0511800/AeUmb.PI554389.v2.3U.G0223200/AeUmb.PI554389.v2.1U.G0580800/AeUmb.PI554389.v2.7U.G0465400/AeUmb.PI554389.v2.3U.G0481800/AeUmb.PI554389.v2.6U.G0400600/AeUmb.PI554389.v2.6U.G0170300/AeUmb.PI554389.v2.2U.G0262200/AeUmb.PI5…	83	0.70339
BP	GO:0009059	macromolecule biosynthetic process	339	0.375034	1.41178	1.27517e-07	1.37208e-05	7.51678e-06	2552	tags=73%, list=53%, signal=37%	AeUmb.PI554389.v2.5U.G0314300/AeUmb.PI554389.v2.7U.G0066800/AeUmb.PI554389.v2.6U.G0591400/AeUmb.PI554389.v2.2U.G0319500/AeUmb.PI554389.v2.3U.G0693800/AeUmb.PI554389.v2.1U.G0269200/AeUmb.PI554389.v2.4U.G0611700/AeUmb.PI554389.v2.4U.G0961100/AeUmb.PI554389.v2.1U.G0284300/AeUmb.PI554389.v2.1U.G0140800/AeUmb.PI554389.v2.2U.G0140100/AeUmb.PI554389.v2.4U.G0131200/AeUmb.PI554389.v2.7U.G0097400/AeUmb.PI5…	249	0.734513
MF	GO:0140096	catalytic activity, acting on a protein	414	0.366228	1.38789	2.2664e-07	2.0322e-05	1.11332e-05	2195	tags=61%, list=46%, signal=36%	AeUmb.PI554389.v2.6U.G0582600/AeUmb.PI554389.v2.5U.G0424000/AeUmb.PI554389.v2.1U.G0174900/AeUmb.PI554389.v2.3U.G0246500/AeUmb.PI554389.v2.1U.G0254000/AeUmb.PI554389.v2.3U.G0047200/AeUmb.PI554389.v2.2U.G0460800/AeUmb.PI554389.v2.2U.G0070700/AeUmb.PI554389.v2.2U.G0683500/AeUmb.PI554389.v2.2U.G0158000/AeUmb.PI554389.v2.5U.G0237300/AeUmb.PI554389.v2.6U.G0501600/AeUmb.PI554389.v2.4U.G0742900/AeUmb.PI5…	254	0.613527
CC	GO:0005737	cytoplasm	105	0.473951	1.68177	6.59858e-07	5.07148e-05	2.77835e-05	1755	tags=70%, list=37%, signal=45%	AeUmb.PI554389.v2.5U.G0444300/AeUmb.PI554389.v2.4U.G0145000/AeUmb.PI554389.v2.2U.G0131000/AeUmb.PI554389.v2.5U.G0335400/AeUmb.PI554389.v2.5U.G0791500/AeUmb.PI554389.v2.2U.G0057300/AeUmb.PI554389.v2.3U.G0182800/AeUmb.PI554389.v2.7U.G1023500/AeUmb.PI554389.v2.5U.G0237400/AeUmb.PI554389.v2.5U.G0718300/AeUmb.PI554389.v2.2U.G0136400/AeUmb.PI554389.v2.1U.G0334400/AeUmb.PI554389.v2.6U.G0443700/AeUmb.PI5…	73	0.695238
BP	GO:0006082	organic acid metabolic process	61	0.531162	1.80247	1.22356e-06	5.49109e-05	3.00823e-05	1811	tags=75%, list=38%, signal=47%	AeUmb.PI554389.v2.5U.G0511800/AeUmb.PI554389.v2.3U.G0223200/AeUmb.PI554389.v2.1U.G0580800/AeUmb.PI554389.v2.3U.G0481800/AeUmb.PI554389.v2.6U.G0400600/AeUmb.PI554389.v2.6U.G0170300/AeUmb.PI554389.v2.2U.G0262200/AeUmb.PI554389.v2.6U.G0611800/AeUmb.PI554389.v2.6U.G0324900/AeUmb.PI554389.v2.1U.G0436800/AeUmb.PI554389.v2.6U.G0138600/AeUmb.PI554389.v2.2U.G0567700/AeUmb.PI554389.v2.5U.G0249200/AeUmb.PI5…	46	0.754098
BP	GO:0019752	carboxylic acid metabolic process	59	0.527809	1.78486	1.32623e-06	5.49109e-05	3.00823e-05	1811	tags=75%, list=38%, signal=47%	AeUmb.PI554389.v2.5U.G0511800/AeUmb.PI554389.v2.3U.G0223200/AeUmb.PI554389.v2.1U.G0580800/AeUmb.PI554389.v2.3U.G0481800/AeUmb.PI554389.v2.6U.G0400600/AeUmb.PI554389.v2.6U.G0170300/AeUmb.PI554389.v2.2U.G0262200/AeUmb.PI554389.v2.6U.G0611800/AeUmb.PI554389.v2.6U.G0324900/AeUmb.PI554389.v2.1U.G0436800/AeUmb.PI554389.v2.6U.G0138600/AeUmb.PI554389.v2.2U.G0567700/AeUmb.PI554389.v2.5U.G0249200/AeUmb.PI5…	44	0.745763
MF	GO:0016788	hydrolase activity, acting on ester bonds	109	0.459331	1.63407	1.05243e-06	5.49109e-05	3.00823e-05	1707	tags=64%, list=36%, signal=42%	AeUmb.PI554389.v2.4U.G1018800/AeUmb.PI554389.v2.3U.G0361900/AeUmb.PI554389.v2.4U.G0742900/AeUmb.PI554389.v2.3U.G0596600/AeUmb.PI554389.v2.5U.G0511800/AeUmb.PI554389.v2.5U.G0894700/AeUmb.PI554389.v2.7U.G0476500/AeUmb.PI554389.v2.7U.G0281100/AeUmb.PI554389.v2.4U.G0926200/AeUmb.PI554389.v2.5U.G0392800/AeUmb.PI554389.v2.3U.G0199300/AeUmb.PI554389.v2.2U.G0785400/AeUmb.PI554389.v2.6U.G0694800/AeUmb.PI5…	70	0.642202
CC	GO:0043227	membrane-bounded organelle	136	0.436819	1.57561	1.42891e-06	5.49109e-05	3.00823e-05	1390	tags=58%, list=29%, signal=42%	AeUmb.PI554389.v2.7U.G0066800/AeUmb.PI554389.v2.1U.G0269200/AeUmb.PI554389.v2.4U.G0011900/AeUmb.PI554389.v2.4U.G0145000/AeUmb.PI554389.v2.2U.G0131000/AeUmb.PI554389.v2.4U.G0961100/AeUmb.PI554389.v2.5U.G0335400/AeUmb.PI554389.v2.5U.G0791500/AeUmb.PI554389.v2.6U.G0556200/AeUmb.PI554389.v2.4U.G0131200/AeUmb.PI554389.v2.1U.G0238400/AeUmb.PI554389.v2.2U.G0057300/AeUmb.PI554389.v2.3U.G0182800/AeUmb.PI5…	79	0.580882
CC	GO:0043231	intracellular membrane-bounded organelle	136	0.436819	1.57561	1.42891e-06	5.49109e-05	3.00823e-05	1390	tags=58%, list=29%, signal=42%	AeUmb.PI554389.v2.7U.G0066800/AeUmb.PI554389.v2.1U.G0269200/AeUmb.PI554389.v2.4U.G0011900/AeUmb.PI554389.v2.4U.G0145000/AeUmb.PI554389.v2.2U.G0131000/AeUmb.PI554389.v2.4U.G0961100/AeUmb.PI554389.v2.5U.G0335400/AeUmb.PI554389.v2.5U.G0791500/AeUmb.PI554389.v2.6U.G0556200/AeUmb.PI554389.v2.4U.G0131200/AeUmb.PI554389.v2.1U.G0238400/AeUmb.PI554389.v2.2U.G0057300/AeUmb.PI554389.v2.3U.G0182800/AeUmb.PI5…	79	0.580882
CC	GO:0005622	intracellular anatomical structure	257	0.390355	1.45316	1.10377e-06	5.49109e-05	3.00823e-05	2395	tags=74%, list=50%, signal=39%	AeUmb.PI554389.v2.7U.G0066800/AeUmb.PI554389.v2.5U.G0444300/AeUmb.PI554389.v2.1U.G0269200/AeUmb.PI554389.v2.4U.G0011900/AeUmb.PI554389.v2.4U.G0145000/AeUmb.PI554389.v2.2U.G0131000/AeUmb.PI554389.v2.4U.G0961100/AeUmb.PI554389.v2.5U.G0335400/AeUmb.PI554389.v2.5U.G0791500/AeUmb.PI554389.v2.6U.G0556200/AeUmb.PI554389.v2.4U.G0131200/AeUmb.PI554389.v2.1U.G0238400/AeUmb.PI554389.v2.2U.G0057300/AeUmb.PI5…	191	0.743191
MF	GO:0016787	hydrolase activity	432	0.359758	1.36542	1.36046e-06	5.49109e-05	3.00823e-05	2253	tags=62%, list=47%, signal=36%	AeUmb.PI554389.v2.7U.G0151600/AeUmb.PI554389.v2.6U.G0582600/AeUmb.PI554389.v2.4U.G1018800/AeUmb.PI554389.v2.5U.G0260600/AeUmb.PI554389.v2.3U.G0361900/AeUmb.PI554389.v2.2U.G0070700/AeUmb.PI554389.v2.4U.G0742900/AeUmb.PI554389.v2.6U.G0404400/AeUmb.PI554389.v2.6U.G0195800/AeUmb.PI554389.v2.5U.G0030100/AeUmb.PI554389.v2.3U.G0596600/AeUmb.PI554389.v2.5U.G0791500/AeUmb.PI554389.v2.1U.G0559900/AeUmb.PI5…	270	0.625
BP	GO:0043436	oxoacid metabolic process	60	0.529504	1.79369	1.61714e-06	5.80016e-05	3.17755e-05	1811	tags=75%, list=38%, signal=47%	AeUmb.PI554389.v2.5U.G0511800/AeUmb.PI554389.v2.3U.G0223200/AeUmb.PI554389.v2.1U.G0580800/AeUmb.PI554389.v2.3U.G0481800/AeUmb.PI554389.v2.6U.G0400600/AeUmb.PI554389.v2.6U.G0170300/AeUmb.PI554389.v2.2U.G0262200/AeUmb.PI554389.v2.6U.G0611800/AeUmb.PI554389.v2.6U.G0324900/AeUmb.PI554389.v2.1U.G0436800/AeUmb.PI554389.v2.6U.G0138600/AeUmb.PI554389.v2.2U.G0567700/AeUmb.PI554389.v2.5U.G0249200/AeUmb.PI5…	45	0.75
BP	GO:1901566	organonitrogen compound biosynthetic process	112	0.448803	1.59997	3.35344e-06	0.000109392	5.99291e-05	1645	tags=61%, list=34%, signal=41%	AeUmb.PI554389.v2.5U.G0541400/AeUmb.PI554389.v2.1U.G0255100/AeUmb.PI554389.v2.4U.G0915500/AeUmb.PI554389.v2.2U.G0555700/AeUmb.PI554389.v2.5U.G0883100/AeUmb.PI554389.v2.2U.G0230500/AeUmb.PI554389.v2.6U.G0170300/AeUmb.PI554389.v2.6U.G0611800/AeUmb.PI554389.v2.1U.G0436800/AeUmb.PI554389.v2.5U.G0256700/AeUmb.PI554389.v2.2U.G0136400/AeUmb.PI554389.v2.6U.G0138600/AeUmb.PI554389.v2.5U.G0706300/AeUmb.PI5…	68	0.607143
BP	GO:0034641	cellular nitrogen compound metabolic process	422	0.35576	1.34918	3.45662e-06	0.000109392	5.99291e-05	2596	tags=70%, list=54%, signal=35%	AeUmb.PI554389.v2.5U.G0314300/AeUmb.PI554389.v2.7U.G0273700/AeUmb.PI554389.v2.7U.G0066800/AeUmb.PI554389.v2.5U.G0541400/AeUmb.PI554389.v2.2U.G0319500/AeUmb.PI554389.v2.3U.G0693800/AeUmb.PI554389.v2.1U.G0269200/AeUmb.PI554389.v2.4U.G0611700/AeUmb.PI554389.v2.4U.G0961100/AeUmb.PI554389.v2.1U.G0284300/AeUmb.PI554389.v2.1U.G0255100/AeUmb.PI554389.v2.1U.G0140800/AeUmb.PI554389.v2.4U.G0915500/AeUmb.PI5…	297	0.703791
MF	GO:0003723	RNA binding	107	0.450965	1.60256	4.94269e-06	0.000147731	8.09329e-05	1458	tags=58%, list=30%, signal=41%	AeUmb.PI554389.v2.5U.G0314300/AeUmb.PI554389.v2.4U.G0980100/AeUmb.PI554389.v2.1U.G0269200/AeUmb.PI554389.v2.4U.G0961100/AeUmb.PI554389.v2.6U.G0572200/AeUmb.PI554389.v2.4U.G0557800/AeUmb.PI554389.v2.5U.G0297100/AeUmb.PI554389.v2.1U.G0247300/AeUmb.PI554389.v2.7U.G0201200/AeUmb.PI554389.v2.2U.G0179800/AeUmb.PI554389.v2.3U.G0157100/AeUmb.PI554389.v2.7U.G0698900/AeUmb.PI554389.v2.7U.G1061700/AeUmb.PI5…	62	0.579439
BP	GO:0006796	phosphate-containing compound metabolic process	300	0.367606	1.37757	7.29439e-06	0.000203694	0.000111591	2191	tags=63%, list=46%, signal=36%	AeUmb.PI554389.v2.7U.G0273700/AeUmb.PI554389.v2.5U.G0424000/AeUmb.PI554389.v2.5U.G0541400/AeUmb.PI554389.v2.1U.G0174900/AeUmb.PI554389.v2.4U.G1018800/AeUmb.PI554389.v2.3U.G0246500/AeUmb.PI554389.v2.1U.G0254000/AeUmb.PI554389.v2.3U.G0047200/AeUmb.PI554389.v2.2U.G0460800/AeUmb.PI554389.v2.2U.G0158000/AeUmb.PI554389.v2.5U.G0237300/AeUmb.PI554389.v2.6U.G0501600/AeUmb.PI554389.v2.4U.G0742900/AeUmb.PI5…	189	0.63
BP	GO:1901360	organic cyclic compound metabolic process	405	0.355458	1.34606	7.57226e-06	0.000203694	0.000111591	2596	tags=70%, list=54%, signal=35%	AeUmb.PI554389.v2.5U.G0314300/AeUmb.PI554389.v2.7U.G0273700/AeUmb.PI554389.v2.7U.G0066800/AeUmb.PI554389.v2.5U.G0541400/AeUmb.PI554389.v2.2U.G0319500/AeUmb.PI554389.v2.3U.G0693800/AeUmb.PI554389.v2.1U.G0269200/AeUmb.PI554389.v2.4U.G0611700/AeUmb.PI554389.v2.4U.G0961100/AeUmb.PI554389.v2.1U.G0284300/AeUmb.PI554389.v2.1U.G0255100/AeUmb.PI554389.v2.1U.G0140800/AeUmb.PI554389.v2.4U.G0915500/AeUmb.PI5…	285	0.703704
BP	GO:0006725	cellular aromatic compound metabolic process	402	0.354664	1.34278	8.26695e-06	0.000211791	0.000116027	2596	tags=70%, list=54%, signal=35%	AeUmb.PI554389.v2.5U.G0314300/AeUmb.PI554389.v2.7U.G0273700/AeUmb.PI554389.v2.7U.G0066800/AeUmb.PI554389.v2.5U.G0541400/AeUmb.PI554389.v2.2U.G0319500/AeUmb.PI554389.v2.3U.G0693800/AeUmb.PI554389.v2.1U.G0269200/AeUmb.PI554389.v2.4U.G0611700/AeUmb.PI554389.v2.4U.G0961100/AeUmb.PI554389.v2.1U.G0284300/AeUmb.PI554389.v2.1U.G0255100/AeUmb.PI554389.v2.1U.G0140800/AeUmb.PI554389.v2.4U.G0915500/AeUmb.PI5…	283	0.70398
BP	GO:0046483	heterocycle metabolic process	402	0.354099	1.34064	8.68376e-06	0.000212357	0.000116337	2596	tags=70%, list=54%, signal=35%	AeUmb.PI554389.v2.5U.G0314300/AeUmb.PI554389.v2.7U.G0273700/AeUmb.PI554389.v2.7U.G0066800/AeUmb.PI554389.v2.5U.G0541400/AeUmb.PI554389.v2.2U.G0319500/AeUmb.PI554389.v2.3U.G0693800/AeUmb.PI554389.v2.1U.G0269200/AeUmb.PI554389.v2.4U.G0611700/AeUmb.PI554389.v2.4U.G0961100/AeUmb.PI554389.v2.1U.G0284300/AeUmb.PI554389.v2.1U.G0255100/AeUmb.PI554389.v2.1U.G0140800/AeUmb.PI554389.v2.4U.G0915500/AeUmb.PI5…	282	0.701493
BP	GO:0010467	gene expression	314	0.371645	1.3953	9.37844e-06	0.000219374	0.000120181	2596	tags=75%, list=54%, signal=36%	AeUmb.PI554389.v2.5U.G0314300/AeUmb.PI554389.v2.7U.G0066800/AeUmb.PI554389.v2.6U.G0591400/AeUmb.PI554389.v2.2U.G0319500/AeUmb.PI554389.v2.3U.G0693800/AeUmb.PI554389.v2.1U.G0269200/AeUmb.PI554389.v2.4U.G0611700/AeUmb.PI554389.v2.4U.G0961100/AeUmb.PI554389.v2.1U.G0284300/AeUmb.PI554389.v2.1U.G0140800/AeUmb.PI554389.v2.2U.G0140100/AeUmb.PI554389.v2.4U.G0131200/AeUmb.PI554389.v2.7U.G0097400/AeUmb.PI5…	234	0.745223
MF	GO:0042578	phosphoric ester hydrolase activity	61	0.505496	1.71538	1.06289e-05	0.000238264	0.00013053	1696	tags=74%, list=35%, signal=48%	AeUmb.PI554389.v2.4U.G1018800/AeUmb.PI554389.v2.3U.G0361900/AeUmb.PI554389.v2.4U.G0742900/AeUmb.PI554389.v2.5U.G0894700/AeUmb.PI554389.v2.7U.G0476500/AeUmb.PI554389.v2.7U.G0281100/AeUmb.PI554389.v2.4U.G0926200/AeUmb.PI554389.v2.2U.G0785400/AeUmb.PI554389.v2.6U.G0104600/AeUmb.PI554389.v2.5U.G0216400/AeUmb.PI554389.v2.3U.G0029700/AeUmb.PI554389.v2.6U.G0238400/AeUmb.PI554389.v2.6U.G0161400/AeUmb.PI5…	45	0.737705
BP	GO:0006793	phosphorus metabolic process	301	0.367079	1.37576	1.2574e-05	0.000270593	0.000148241	2191	tags=63%, list=46%, signal=36%	AeUmb.PI554389.v2.7U.G0273700/AeUmb.PI554389.v2.5U.G0424000/AeUmb.PI554389.v2.5U.G0541400/AeUmb.PI554389.v2.1U.G0174900/AeUmb.PI554389.v2.4U.G1018800/AeUmb.PI554389.v2.3U.G0246500/AeUmb.PI554389.v2.1U.G0254000/AeUmb.PI554389.v2.3U.G0047200/AeUmb.PI554389.v2.2U.G0460800/AeUmb.PI554389.v2.2U.G0158000/AeUmb.PI554389.v2.5U.G0237300/AeUmb.PI554389.v2.6U.G0501600/AeUmb.PI554389.v2.4U.G0742900/AeUmb.PI5…	189	0.627907
MF	GO:0016791	phosphatase activity	51	0.521689	1.74111	1.68965e-05	0.000349627	0.000191539	1608	tags=75%, list=34%, signal=50%	AeUmb.PI554389.v2.4U.G1018800/AeUmb.PI554389.v2.3U.G0361900/AeUmb.PI554389.v2.4U.G0742900/AeUmb.PI554389.v2.5U.G0894700/AeUmb.PI554389.v2.7U.G0476500/AeUmb.PI554389.v2.7U.G0281100/AeUmb.PI554389.v2.4U.G0926200/AeUmb.PI554389.v2.2U.G0785400/AeUmb.PI554389.v2.6U.G0104600/AeUmb.PI554389.v2.5U.G0216400/AeUmb.PI554389.v2.6U.G0238400/AeUmb.PI554389.v2.6U.G0161400/AeUmb.PI554389.v2.6U.G0360400/AeUmb.PI5…	38	0.745098
CC	GO:0043226	organelle	195	0.3897	1.43299	2.2759e-05	0.000437297	0.000239568	2439	tags=76%, list=51%, signal=39%	AeUmb.PI554389.v2.7U.G0066800/AeUmb.PI554389.v2.1U.G0269200/AeUmb.PI554389.v2.4U.G0011900/AeUmb.PI554389.v2.4U.G0145000/AeUmb.PI554389.v2.2U.G0131000/AeUmb.PI554389.v2.4U.G0961100/AeUmb.PI554389.v2.5U.G0335400/AeUmb.PI554389.v2.5U.G0791500/AeUmb.PI554389.v2.6U.G0556200/AeUmb.PI554389.v2.4U.G0131200/AeUmb.PI554389.v2.1U.G0238400/AeUmb.PI554389.v2.2U.G0057300/AeUmb.PI554389.v2.3U.G0182800/AeUmb.PI5…	148	0.758974
CC	GO:0043229	intracellular organelle	195	0.3897	1.43299	2.2759e-05	0.000437297	0.000239568	2439	tags=76%, list=51%, signal=39%	AeUmb.PI554389.v2.7U.G0066800/AeUmb.PI554389.v2.1U.G0269200/AeUmb.PI554389.v2.4U.G0011900/AeUmb.PI554389.v2.4U.G0145000/AeUmb.PI554389.v2.2U.G0131000/AeUmb.PI554389.v2.4U.G0961100/AeUmb.PI554389.v2.5U.G0335400/AeUmb.PI554389.v2.5U.G0791500/AeUmb.PI554389.v2.6U.G0556200/AeUmb.PI554389.v2.4U.G0131200/AeUmb.PI554389.v2.1U.G0238400/AeUmb.PI554389.v2.2U.G0057300/AeUmb.PI554389.v2.3U.G0182800/AeUmb.PI5…	148	0.758974
CC	GO:0032991	protein-containing complex	150	0.402363	1.45911	2.89052e-05	0.000528431	0.000289495	1919	tags=63%, list=40%, signal=39%	AeUmb.PI554389.v2.3U.G0195000/AeUmb.PI554389.v2.7U.G0273700/AeUmb.PI554389.v2.5U.G0444300/AeUmb.PI554389.v2.2U.G0131000/AeUmb.PI554389.v2.1U.G0284300/AeUmb.PI554389.v2.4U.G0914600/AeUmb.PI554389.v2.4U.G0131200/AeUmb.PI554389.v2.2U.G0057300/AeUmb.PI554389.v2.3U.G0224900/AeUmb.PI554389.v2.7U.G1023500/AeUmb.PI554389.v2.5U.G0392800/AeUmb.PI554389.v2.5U.G0237400/AeUmb.PI554389.v2.6U.G0694800/AeUmb.PI5…	95	0.633333
BP	GO:0016070	RNA metabolic process	272	0.363621	1.35738	2.94664e-05	0.000528431	0.000289495	1936	tags=57%, list=40%, signal=36%	AeUmb.PI554389.v2.5U.G0314300/AeUmb.PI554389.v2.7U.G0066800/AeUmb.PI554389.v2.2U.G0319500/AeUmb.PI554389.v2.3U.G0693800/AeUmb.PI554389.v2.1U.G0269200/AeUmb.PI554389.v2.4U.G0611700/AeUmb.PI554389.v2.4U.G0961100/AeUmb.PI554389.v2.1U.G0284300/AeUmb.PI554389.v2.1U.G0140800/AeUmb.PI554389.v2.2U.G0140100/AeUmb.PI554389.v2.4U.G0131200/AeUmb.PI554389.v2.7U.G0097400/AeUmb.PI554389.v2.7U.G0201200/AeUmb.PI5…	156	0.573529
MF	GO:0004721	phosphoprotein phosphatase activity	25	0.612958	1.87428	3.24511e-05	0.000563184	0.000308534	1608	tags=92%, list=34%, signal=61%	AeUmb.PI554389.v2.4U.G0742900/AeUmb.PI554389.v2.5U.G0894700/AeUmb.PI554389.v2.4U.G0926200/AeUmb.PI554389.v2.2U.G0785400/AeUmb.PI554389.v2.6U.G0104600/AeUmb.PI554389.v2.6U.G0161400/AeUmb.PI554389.v2.4U.G0031000/AeUmb.PI554389.v2.3U.G0409800/AeUmb.PI554389.v2.7U.G0531400/AeUmb.PI554389.v2.3U.G0265900/AeUmb.PI554389.v2.1U.G0176400/AeUmb.PI554389.v2.5U.G0257200/AeUmb.PI554389.v2.7U.G0169900/AeUmb.PI5…	23	0.92
BP	GO:0006396	RNA processing	65	0.484484	1.65334	3.62014e-05	0.000608637	0.000333434	1935	tags=78%, list=40%, signal=47%	AeUmb.PI554389.v2.5U.G0314300/AeUmb.PI554389.v2.7U.G0066800/AeUmb.PI554389.v2.1U.G0269200/AeUmb.PI554389.v2.4U.G0961100/AeUmb.PI554389.v2.1U.G0284300/AeUmb.PI554389.v2.4U.G0131200/AeUmb.PI554389.v2.7U.G0097400/AeUmb.PI554389.v2.4U.G0926200/AeUmb.PI554389.v2.4U.G1029100/AeUmb.PI554389.v2.2U.G0785400/AeUmb.PI554389.v2.7U.G0191700/AeUmb.PI554389.v2.4U.G0576600/AeUmb.PI554389.v2.7U.G0155400/AeUmb.PI5…	51	0.784615
BP	GO:0044271	cellular nitrogen compound biosynthetic process	258	0.368283	1.37129	4.23752e-05	0.000690844	0.000378471	2395	tags=68%, list=50%, signal=36%	AeUmb.PI554389.v2.5U.G0541400/AeUmb.PI554389.v2.2U.G0319500/AeUmb.PI554389.v2.3U.G0693800/AeUmb.PI554389.v2.4U.G0611700/AeUmb.PI554389.v2.1U.G0255100/AeUmb.PI554389.v2.1U.G0140800/AeUmb.PI554389.v2.4U.G0915500/AeUmb.PI554389.v2.2U.G0140100/AeUmb.PI554389.v2.2U.G0555700/AeUmb.PI554389.v2.5U.G0670500/AeUmb.PI554389.v2.4U.G0897300/AeUmb.PI554389.v2.5U.G0262900/AeUmb.PI554389.v2.4U.G0936800/AeUmb.PI5…	176	0.682171
BP	GO:0032196	transposition	12	-0.665129	-2.38116	6.18693e-05	0.0009525	0.000521816	1610	tags=92%, list=34%, signal=61%	AeUmb.PI554389.v2.3U.G0544200/AeUmb.PI554389.v2.1U.G0052100/AeUmb.PI554389.v2.5U.G0046200/AeUmb.PI554389.v2.7U.G0720100/AeUmb.PI554389.v2.4U.G0102300/AeUmb.PI554389.v2.7U.G0971600/AeUmb.PI554389.v2.6U.G0043100/AeUmb.PI554389.v2.7U.G0551000/AeUmb.PI554389.v2.2U.G0464800/AeUmb.PI554389.v2.6U.G0295200/AeUmb.PI554389.v2.5U.G0626000	11	0.916667
BP	GO:0006139	nucleobase-containing compound metabolic process	378	0.348333	1.31601	6.2608e-05	0.0009525	0.000521816	2596	tags=69%, list=54%, signal=34%	AeUmb.PI554389.v2.5U.G0314300/AeUmb.PI554389.v2.7U.G0273700/AeUmb.PI554389.v2.7U.G0066800/AeUmb.PI554389.v2.5U.G0541400/AeUmb.PI554389.v2.2U.G0319500/AeUmb.PI554389.v2.3U.G0693800/AeUmb.PI554389.v2.1U.G0269200/AeUmb.PI554389.v2.4U.G0611700/AeUmb.PI554389.v2.4U.G0961100/AeUmb.PI554389.v2.1U.G0284300/AeUmb.PI554389.v2.1U.G0140800/AeUmb.PI554389.v2.4U.G0915500/AeUmb.PI554389.v2.2U.G0140100/AeUmb.PI5…	262	0.693122
BP	GO:0019538	protein metabolic process	473	0.338337	1.28771	6.3736e-05	0.0009525	0.000521816	2373	tags=62%, list=50%, signal=34%	AeUmb.PI554389.v2.6U.G0582600/AeUmb.PI554389.v2.6U.G0591400/AeUmb.PI554389.v2.5U.G0424000/AeUmb.PI554389.v2.1U.G0174900/AeUmb.PI554389.v2.3U.G0246500/AeUmb.PI554389.v2.1U.G0254000/AeUmb.PI554389.v2.3U.G0047200/AeUmb.PI554389.v2.2U.G0460800/AeUmb.PI554389.v2.2U.G0070700/AeUmb.PI554389.v2.2U.G0683500/AeUmb.PI554389.v2.2U.G0158000/AeUmb.PI554389.v2.5U.G0237300/AeUmb.PI554389.v2.6U.G0501600/AeUmb.PI5…	291	0.615222
BP	GO:0051641	cellular localization	44	0.526447	1.72873	6.60119e-05	0.000959849	0.000525842	1764	tags=77%, list=37%, signal=49%	AeUmb.PI554389.v2.4U.G0983100/AeUmb.PI554389.v2.6U.G0195800/AeUmb.PI554389.v2.3U.G0661200/AeUmb.PI554389.v2.7U.G0794900/AeUmb.PI554389.v2.3U.G0016100/AeUmb.PI554389.v2.5U.G0310600/AeUmb.PI554389.v2.4U.G0264500/AeUmb.PI554389.v2.1U.G0450000/AeUmb.PI554389.v2.7U.G0235700/AeUmb.PI554389.v2.3U.G0078600/AeUmb.PI554389.v2.6U.G0443700/AeUmb.PI554389.v2.2U.G0058700/AeUmb.PI554389.v2.1U.G0472700/AeUmb.PI5…	34	0.772727
CC	GO:0031090	organelle membrane	31	0.569953	1.79637	9.32144e-05	0.00128588	0.000704454	1332	tags=74%, list=28%, signal=54%	AeUmb.PI554389.v2.2U.G0131000/AeUmb.PI554389.v2.5U.G0335400/AeUmb.PI554389.v2.5U.G0791500/AeUmb.PI554389.v2.3U.G0182800/AeUmb.PI554389.v2.5U.G0237400/AeUmb.PI554389.v2.1U.G0334400/AeUmb.PI554389.v2.6U.G0443700/AeUmb.PI554389.v2.1U.G0472700/AeUmb.PI554389.v2.7U.G0143200/AeUmb.PI554389.v2.6U.G0423400/AeUmb.PI554389.v2.5U.G0216700/AeUmb.PI554389.v2.7U.G1004300/AeUmb.PI554389.v2.1U.G0283600/AeUmb.PI5…	23	0.741935
MF	GO:0003676	nucleic acid binding	372	0.343411	1.29669	9.19372e-05	0.00128588	0.000704454	1945	tags=52%, list=41%, signal=33%	AeUmb.PI554389.v2.5U.G0314300/AeUmb.PI554389.v2.4U.G0980100/AeUmb.PI554389.v2.5U.G0444300/AeUmb.PI554389.v2.1U.G0269200/AeUmb.PI554389.v2.4U.G0011900/AeUmb.PI554389.v2.4U.G0961100/AeUmb.PI554389.v2.6U.G0572200/AeUmb.PI554389.v2.2U.G0137500/AeUmb.PI554389.v2.4U.G0557800/AeUmb.PI554389.v2.1U.G0446800/AeUmb.PI554389.v2.4U.G0865200/AeUmb.PI554389.v2.5U.G0297100/AeUmb.PI554389.v2.1U.G0526200/AeUmb.PI5…	193	0.518817
BP	GO:0016311	dephosphorylation	32	0.560527	1.77451	0.000107881	0.001451	0.000794912	1696	tags=88%, list=35%, signal=57%	AeUmb.PI554389.v2.4U.G0742900/AeUmb.PI554389.v2.5U.G0894700/AeUmb.PI554389.v2.4U.G0926200/AeUmb.PI554389.v2.2U.G0785400/AeUmb.PI554389.v2.6U.G0104600/AeUmb.PI554389.v2.5U.G0216400/AeUmb.PI554389.v2.4U.G0031000/AeUmb.PI554389.v2.5U.G0679800/AeUmb.PI554389.v2.7U.G0531400/AeUmb.PI554389.v2.3U.G0265900/AeUmb.PI554389.v2.1U.G0207100/AeUmb.PI554389.v2.1U.G0176400/AeUmb.PI554389.v2.5U.G0257200/AeUmb.PI5…	28	0.875
MF	GO:0022853	active monoatomic ion transmembrane transporter activity	23	0.620807	1.87417	0.000112078	0.00147068	0.000805694	1418	tags=83%, list=30%, signal=58%	AeUmb.PI554389.v2.3U.G0195000/AeUmb.PI554389.v2.7U.G0273700/AeUmb.PI554389.v2.2U.G0131000/AeUmb.PI554389.v2.6U.G0460100/AeUmb.PI554389.v2.3U.G0224900/AeUmb.PI554389.v2.5U.G0836500/AeUmb.PI554389.v2.6U.G0149900/AeUmb.PI554389.v2.7U.G0070300/AeUmb.PI554389.v2.4U.G0432400/AeUmb.PI554389.v2.5U.G0316300/AeUmb.PI554389.v2.5U.G0147600/AeUmb.PI554389.v2.7U.G1028000/AeUmb.PI554389.v2.2U.G0475900/AeUmb.PI5…	19	0.826087
CC	GO:0098588	bounding membrane of organelle	10	0.761523	1.95941	0.000129055	0.00165314	0.000905651	1055	tags=90%, list=22%, signal=70%	AeUmb.PI554389.v2.2U.G0131000/AeUmb.PI554389.v2.5U.G0335400/AeUmb.PI554389.v2.5U.G0791500/AeUmb.PI554389.v2.3U.G0182800/AeUmb.PI554389.v2.1U.G0472700/AeUmb.PI554389.v2.5U.G0216700/AeUmb.PI554389.v2.1U.G0283600/AeUmb.PI554389.v2.3U.G0314900/AeUmb.PI554389.v2.4U.G0893900	9	0.9
CC	GO:0016020	membrane	299	0.349585	1.30995	0.000171179	0.00214173	0.00117332	2520	tags=70%, list=53%, signal=35%	AeUmb.PI554389.v2.7U.G0398100/AeUmb.PI554389.v2.3U.G0195000/AeUmb.PI554389.v2.7U.G0273700/AeUmb.PI554389.v2.6U.G0591400/AeUmb.PI554389.v2.3U.G0289100/AeUmb.PI554389.v2.6U.G0123500/AeUmb.PI554389.v2.5U.G0283800/AeUmb.PI554389.v2.2U.G0131000/AeUmb.PI554389.v2.3U.G0018900/AeUmb.PI554389.v2.5U.G0335400/AeUmb.PI554389.v2.5U.G0791500/AeUmb.PI554389.v2.4U.G0710500/AeUmb.PI554389.v2.6U.G0604900/AeUmb.PI5…	210	0.702341
BP	GO:0006470	protein dephosphorylation	23	0.607817	1.83495	0.000232123	0.00265707	0.00145564	1608	tags=91%, list=34%, signal=61%	AeUmb.PI554389.v2.4U.G0742900/AeUmb.PI554389.v2.5U.G0894700/AeUmb.PI554389.v2.4U.G0926200/AeUmb.PI554389.v2.2U.G0785400/AeUmb.PI554389.v2.6U.G0104600/AeUmb.PI554389.v2.4U.G0031000/AeUmb.PI554389.v2.5U.G0679800/AeUmb.PI554389.v2.7U.G0531400/AeUmb.PI554389.v2.3U.G0265900/AeUmb.PI554389.v2.1U.G0176400/AeUmb.PI554389.v2.5U.G0257200/AeUmb.PI554389.v2.7U.G0169900/AeUmb.PI554389.v2.5U.G0323200/AeUmb.PI5…	21	0.913043
BP	GO:0006520	amino acid metabolic process	42	0.521667	1.70507	0.000230242	0.00265707	0.00145564	1491	tags=57%, list=31%, signal=40%	AeUmb.PI554389.v2.6U.G0170300/AeUmb.PI554389.v2.5U.G0256700/AeUmb.PI554389.v2.2U.G0567700/AeUmb.PI554389.v2.6U.G0698300/AeUmb.PI554389.v2.7U.G0181700/AeUmb.PI554389.v2.5U.G0056600/AeUmb.PI554389.v2.6U.G0243600/AeUmb.PI554389.v2.6U.G0286000/AeUmb.PI554389.v2.1U.G0498100/AeUmb.PI554389.v2.5U.G0190400/AeUmb.PI554389.v2.2U.G0657100/AeUmb.PI554389.v2.5U.G0221000/AeUmb.PI554389.v2.1U.G0226600/AeUmb.PI5…	24	0.571429
BP	GO:0019637	organophosphate metabolic process	64	0.460745	1.57009	0.000223326	0.00265707	0.00145564	2315	tags=84%, list=48%, signal=44%	AeUmb.PI554389.v2.7U.G0273700/AeUmb.PI554389.v2.5U.G0541400/AeUmb.PI554389.v2.4U.G1018800/AeUmb.PI554389.v2.4U.G0915500/AeUmb.PI554389.v2.5U.G0883100/AeUmb.PI554389.v2.1U.G0580800/AeUmb.PI554389.v2.5U.G0121100/AeUmb.PI554389.v2.6U.G0611800/AeUmb.PI554389.v2.3U.G0276000/AeUmb.PI554389.v2.3U.G0029700/AeUmb.PI554389.v2.6U.G0598500/AeUmb.PI554389.v2.3U.G0519000/AeUmb.PI554389.v2.6U.G0563300/AeUmb.PI5…	54	0.84375
BP	GO:0018130	heterocycle biosynthetic process	223	0.36132	1.33739	0.000218791	0.00265707	0.00145564	2538	tags=71%, list=53%, signal=35%	AeUmb.PI554389.v2.5U.G0541400/AeUmb.PI554389.v2.2U.G0319500/AeUmb.PI554389.v2.3U.G0693800/AeUmb.PI554389.v2.4U.G0611700/AeUmb.PI554389.v2.1U.G0255100/AeUmb.PI554389.v2.1U.G0140800/AeUmb.PI554389.v2.4U.G0915500/AeUmb.PI554389.v2.2U.G0140100/AeUmb.PI554389.v2.2U.G0555700/AeUmb.PI554389.v2.5U.G0670500/AeUmb.PI554389.v2.4U.G0897300/AeUmb.PI554389.v2.5U.G0262900/AeUmb.PI554389.v2.4U.G0936800/AeUmb.PI5…	159	0.713004
MF	GO:0016755	aminoacyltransferase activity	33	0.536693	1.7066	0.000244066	0.00267975	0.00146807	1639	tags=76%, list=34%, signal=50%	AeUmb.PI554389.v2.6U.G0566800/AeUmb.PI554389.v2.1U.G0284300/AeUmb.PI554389.v2.1U.G0260700/AeUmb.PI554389.v2.1U.G0476800/AeUmb.PI554389.v2.6U.G0518600/AeUmb.PI554389.v2.6U.G0251300/AeUmb.PI554389.v2.1U.G0117000/AeUmb.PI554389.v2.2U.G0646100/AeUmb.PI554389.v2.3U.G0501600/AeUmb.PI554389.v2.5U.G0795000/AeUmb.PI554389.v2.1U.G0395600/AeUmb.PI554389.v2.5U.G0169000/AeUmb.PI554389.v2.3U.G0101900/AeUmb.PI5…	25	0.757576
BP	GO:1901362	organic cyclic compound biosynthetic process	227	0.363948	1.34825	0.000243798	0.00267975	0.00146807	2538	tags=72%, list=53%, signal=35%	AeUmb.PI554389.v2.5U.G0541400/AeUmb.PI554389.v2.2U.G0319500/AeUmb.PI554389.v2.3U.G0693800/AeUmb.PI554389.v2.4U.G0611700/AeUmb.PI554389.v2.1U.G0255100/AeUmb.PI554389.v2.1U.G0140800/AeUmb.PI554389.v2.4U.G0915500/AeUmb.PI554389.v2.2U.G0140100/AeUmb.PI554389.v2.2U.G0555700/AeUmb.PI554389.v2.5U.G0670500/AeUmb.PI554389.v2.4U.G0897300/AeUmb.PI554389.v2.5U.G0262900/AeUmb.PI554389.v2.4U.G0936800/AeUmb.PI5…	163	0.718062
BP	GO:0034220	monoatomic ion transmembrane transport	29	0.552811	1.72627	0.000253596	0.00271604	0.00148795	1478	tags=72%, list=31%, signal=50%	AeUmb.PI554389.v2.3U.G0195000/AeUmb.PI554389.v2.7U.G0273700/AeUmb.PI554389.v2.2U.G0131000/AeUmb.PI554389.v2.5U.G0335400/AeUmb.PI554389.v2.3U.G0182800/AeUmb.PI554389.v2.3U.G0224900/AeUmb.PI554389.v2.5U.G0671900/AeUmb.PI554389.v2.5U.G0836500/AeUmb.PI554389.v2.2U.G0158700/AeUmb.PI554389.v2.7U.G0319200/AeUmb.PI554389.v2.2U.G0681500/AeUmb.PI554389.v2.2U.G0214600/AeUmb.PI554389.v2.4U.G0432400/AeUmb.PI5…	21	0.724138
BP	GO:1901575	organic substance catabolic process	71	0.451892	1.55295	0.000257468	0.00271604	0.00148795	1654	tags=62%, list=35%, signal=41%	AeUmb.PI554389.v2.5U.G0030100/AeUmb.PI554389.v2.3U.G0596600/AeUmb.PI554389.v2.4U.G0914600/AeUmb.PI554389.v2.5U.G0511800/AeUmb.PI554389.v2.6U.G0660300/AeUmb.PI554389.v2.7U.G0794900/AeUmb.PI554389.v2.1U.G0260700/AeUmb.PI554389.v2.1U.G0580800/AeUmb.PI554389.v2.7U.G0698900/AeUmb.PI554389.v2.1U.G0476800/AeUmb.PI554389.v2.2U.G0100400/AeUmb.PI554389.v2.6U.G0324900/AeUmb.PI554389.v2.7U.G0235700/AeUmb.PI5…	44	0.619718
CC	GO:1902494	catalytic complex	63	0.460563	1.56738	0.000293923	0.00304097	0.00166596	1803	tags=68%, list=38%, signal=43%	AeUmb.PI554389.v2.3U.G0195000/AeUmb.PI554389.v2.7U.G0273700/AeUmb.PI554389.v2.2U.G0131000/AeUmb.PI554389.v2.4U.G0914600/AeUmb.PI554389.v2.2U.G0057300/AeUmb.PI554389.v2.3U.G0224900/AeUmb.PI554389.v2.5U.G0237400/AeUmb.PI554389.v2.1U.G0557300/AeUmb.PI554389.v2.2U.G0100400/AeUmb.PI554389.v2.6U.G0277200/AeUmb.PI554389.v2.3U.G0040800/AeUmb.PI554389.v2.7U.G0640800/AeUmb.PI554389.v2.6U.G0457200/AeUmb.PI5…	43	0.68254
CC	GO:0031966	mitochondrial membrane	13	0.690325	1.8801	0.000343677	0.00322552	0.00176706	1332	tags=92%, list=28%, signal=67%	AeUmb.PI554389.v2.5U.G0335400/AeUmb.PI554389.v2.5U.G0791500/AeUmb.PI554389.v2.3U.G0182800/AeUmb.PI554389.v2.5U.G0237400/AeUmb.PI554389.v2.7U.G0143200/AeUmb.PI554389.v2.6U.G0423400/AeUmb.PI554389.v2.7U.G1004300/AeUmb.PI554389.v2.1U.G0299400/AeUmb.PI554389.v2.3U.G0283900/AeUmb.PI554389.v2.4U.G0932400/AeUmb.PI554389.v2.1U.G0423600/AeUmb.PI554389.v2.4U.G0970100	12	0.923077
BP	GO:0008104	protein localization	31	0.545604	1.71962	0.000353728	0.00322552	0.00176706	722	tags=55%, list=15%, signal=47%	AeUmb.PI554389.v2.4U.G0983100/AeUmb.PI554389.v2.6U.G0195800/AeUmb.PI554389.v2.3U.G0661200/AeUmb.PI554389.v2.7U.G0794900/AeUmb.PI554389.v2.3U.G0016100/AeUmb.PI554389.v2.4U.G0264500/AeUmb.PI554389.v2.1U.G0450000/AeUmb.PI554389.v2.7U.G0235700/AeUmb.PI554389.v2.3U.G0078600/AeUmb.PI554389.v2.6U.G0443700/AeUmb.PI554389.v2.2U.G0058700/AeUmb.PI554389.v2.1U.G0472700/AeUmb.PI554389.v2.4U.G0939600/AeUmb.PI5…	17	0.548387
BP	GO:0045184	establishment of protein localization	31	0.545604	1.71962	0.000353728	0.00322552	0.00176706	722	tags=55%, list=15%, signal=47%	AeUmb.PI554389.v2.4U.G0983100/AeUmb.PI554389.v2.6U.G0195800/AeUmb.PI554389.v2.3U.G0661200/AeUmb.PI554389.v2.7U.G0794900/AeUmb.PI554389.v2.3U.G0016100/AeUmb.PI554389.v2.4U.G0264500/AeUmb.PI554389.v2.1U.G0450000/AeUmb.PI554389.v2.7U.G0235700/AeUmb.PI554389.v2.3U.G0078600/AeUmb.PI554389.v2.6U.G0443700/AeUmb.PI554389.v2.2U.G0058700/AeUmb.PI554389.v2.1U.G0472700/AeUmb.PI554389.v2.4U.G0939600/AeUmb.PI5…	17	0.548387
BP	GO:0070727	cellular macromolecule localization	31	0.545604	1.71962	0.000353728	0.00322552	0.00176706	722	tags=55%, list=15%, signal=47%	AeUmb.PI554389.v2.4U.G0983100/AeUmb.PI554389.v2.6U.G0195800/AeUmb.PI554389.v2.3U.G0661200/AeUmb.PI554389.v2.7U.G0794900/AeUmb.PI554389.v2.3U.G0016100/AeUmb.PI554389.v2.4U.G0264500/AeUmb.PI554389.v2.1U.G0450000/AeUmb.PI554389.v2.7U.G0235700/AeUmb.PI554389.v2.3U.G0078600/AeUmb.PI554389.v2.6U.G0443700/AeUmb.PI554389.v2.2U.G0058700/AeUmb.PI554389.v2.1U.G0472700/AeUmb.PI554389.v2.4U.G0939600/AeUmb.PI5…	17	0.548387
BP	GO:0046907	intracellular transport	34	0.533215	1.70222	0.000339831	0.00322552	0.00176706	1764	tags=79%, list=37%, signal=50%	AeUmb.PI554389.v2.4U.G0983100/AeUmb.PI554389.v2.7U.G0794900/AeUmb.PI554389.v2.3U.G0016100/AeUmb.PI554389.v2.5U.G0310600/AeUmb.PI554389.v2.4U.G0264500/AeUmb.PI554389.v2.7U.G0235700/AeUmb.PI554389.v2.3U.G0078600/AeUmb.PI554389.v2.2U.G0058700/AeUmb.PI554389.v2.1U.G0472700/AeUmb.PI554389.v2.5U.G0318500/AeUmb.PI554389.v2.1U.G0283600/AeUmb.PI554389.v2.7U.G0157300/AeUmb.PI554389.v2.3U.G0110600/AeUmb.PI5…	27	0.794118
BP	GO:0051649	establishment of localization in cell	34	0.533215	1.70222	0.000339831	0.00322552	0.00176706	1764	tags=79%, list=37%, signal=50%	AeUmb.PI554389.v2.4U.G0983100/AeUmb.PI554389.v2.7U.G0794900/AeUmb.PI554389.v2.3U.G0016100/AeUmb.PI554389.v2.5U.G0310600/AeUmb.PI554389.v2.4U.G0264500/AeUmb.PI554389.v2.7U.G0235700/AeUmb.PI554389.v2.3U.G0078600/AeUmb.PI554389.v2.2U.G0058700/AeUmb.PI554389.v2.1U.G0472700/AeUmb.PI554389.v2.5U.G0318500/AeUmb.PI554389.v2.1U.G0283600/AeUmb.PI554389.v2.7U.G0157300/AeUmb.PI554389.v2.3U.G0110600/AeUmb.PI5…	27	0.794118
BP	GO:0009056	catabolic process	88	0.42533	1.48939	0.000339492	0.00322552	0.00176706	1702	tags=57%, list=36%, signal=37%	AeUmb.PI554389.v2.5U.G0030100/AeUmb.PI554389.v2.3U.G0596600/AeUmb.PI554389.v2.4U.G0914600/AeUmb.PI554389.v2.5U.G0511800/AeUmb.PI554389.v2.6U.G0660300/AeUmb.PI554389.v2.7U.G0794900/AeUmb.PI554389.v2.1U.G0260700/AeUmb.PI554389.v2.1U.G0580800/AeUmb.PI554389.v2.7U.G0698900/AeUmb.PI554389.v2.1U.G0476800/AeUmb.PI554389.v2.2U.G0100400/AeUmb.PI554389.v2.6U.G0324900/AeUmb.PI554389.v2.7U.G0235700/AeUmb.PI5…	50	0.568182
MF	GO:0016746	acyltransferase activity	81	0.432265	1.50338	0.000366833	0.00328927	0.00180199	1991	tags=64%, list=42%, signal=38%	AeUmb.PI554389.v2.6U.G0566800/AeUmb.PI554389.v2.1U.G0284300/AeUmb.PI554389.v2.1U.G0260700/AeUmb.PI554389.v2.1U.G0476800/AeUmb.PI554389.v2.6U.G0518600/AeUmb.PI554389.v2.6U.G0400600/AeUmb.PI554389.v2.6U.G0251300/AeUmb.PI554389.v2.1U.G0117000/AeUmb.PI554389.v2.2U.G0646100/AeUmb.PI554389.v2.3U.G0501600/AeUmb.PI554389.v2.3U.G0519000/AeUmb.PI554389.v2.5U.G0795000/AeUmb.PI554389.v2.1U.G0395600/AeUmb.PI5…	52	0.641975
MF	GO:0061659	ubiquitin-like protein ligase activity	18	0.63165	1.83127	0.000457409	0.0040342	0.00221009	806	tags=72%, list=17%, signal=60%	AeUmb.PI554389.v2.6U.G0566800/AeUmb.PI554389.v2.1U.G0284300/AeUmb.PI554389.v2.1U.G0260700/AeUmb.PI554389.v2.6U.G0251300/AeUmb.PI554389.v2.1U.G0117000/AeUmb.PI554389.v2.3U.G0501600/AeUmb.PI554389.v2.5U.G0795000/AeUmb.PI554389.v2.1U.G0395600/AeUmb.PI554389.v2.3U.G0101900/AeUmb.PI554389.v2.3U.G0331200/AeUmb.PI554389.v2.1U.G0312600/AeUmb.PI554389.v2.4U.G1006800/AeUmb.PI554389.v2.1U.G0224800	13	0.722222
BP	GO:0065007	biological regulation	275	0.350785	1.30994	0.000499162	0.00433144	0.00237293	2545	tags=70%, list=53%, signal=35%	AeUmb.PI554389.v2.7U.G0066800/AeUmb.PI554389.v2.2U.G0319500/AeUmb.PI554389.v2.4U.G0611700/AeUmb.PI554389.v2.5U.G0237000/AeUmb.PI554389.v2.5U.G0791500/AeUmb.PI554389.v2.1U.G0140800/AeUmb.PI554389.v2.2U.G0140100/AeUmb.PI554389.v2.1U.G0260700/AeUmb.PI554389.v2.6U.G0283900/AeUmb.PI554389.v2.5U.G0670500/AeUmb.PI554389.v2.3U.G0346200/AeUmb.PI554389.v2.7U.G0698900/AeUmb.PI554389.v2.4U.G0897300/AeUmb.PI5…	193	0.701818
MF	GO:0022890	inorganic cation transmembrane transporter activity	41	0.497237	1.62029	0.000508677	0.00434394	0.00237977	1812	tags=71%, list=38%, signal=44%	AeUmb.PI554389.v2.3U.G0195000/AeUmb.PI554389.v2.7U.G0273700/AeUmb.PI554389.v2.2U.G0131000/AeUmb.PI554389.v2.3U.G0018900/AeUmb.PI554389.v2.6U.G0460100/AeUmb.PI554389.v2.3U.G0224900/AeUmb.PI554389.v2.5U.G0671900/AeUmb.PI554389.v2.5U.G0836500/AeUmb.PI554389.v2.2U.G0158700/AeUmb.PI554389.v2.7U.G0319200/AeUmb.PI554389.v2.2U.G0681500/AeUmb.PI554389.v2.6U.G0598500/AeUmb.PI554389.v2.2U.G0214600/AeUmb.PI5…	29	0.707317
MF	GO:0019001	guanyl nucleotide binding	26	0.566481	1.74259	0.000519714	0.00436885	0.00239342	1581	tags=81%, list=33%, signal=54%	AeUmb.PI554389.v2.6U.G0195800/AeUmb.PI554389.v2.5U.G0791500/AeUmb.PI554389.v2.3U.G0661200/AeUmb.PI554389.v2.4U.G0630900/AeUmb.PI554389.v2.7U.G0008200/AeUmb.PI554389.v2.1U.G0323500/AeUmb.PI554389.v2.5U.G0068400/AeUmb.PI554389.v2.5U.G0706300/AeUmb.PI554389.v2.1U.G0573300/AeUmb.PI554389.v2.4U.G1023200/AeUmb.PI554389.v2.5U.G0141300/AeUmb.PI554389.v2.7U.G0398200/AeUmb.PI554389.v2.4U.G0939600/AeUmb.PI5…	21	0.807692
BP	GO:0006629	lipid metabolic process	90	0.415515	1.45743	0.000563273	0.00466217	0.00255411	2195	tags=72%, list=46%, signal=40%	AeUmb.PI554389.v2.4U.G1018800/AeUmb.PI554389.v2.2U.G0103300/AeUmb.PI554389.v2.5U.G0030100/AeUmb.PI554389.v2.3U.G0223200/AeUmb.PI554389.v2.6U.G0660300/AeUmb.PI554389.v2.5U.G0883100/AeUmb.PI554389.v2.3U.G0481800/AeUmb.PI554389.v2.7U.G0888800/AeUmb.PI554389.v2.4U.G0986700/AeUmb.PI554389.v2.2U.G0885900/AeUmb.PI554389.v2.5U.G0121100/AeUmb.PI554389.v2.3U.G0029700/AeUmb.PI554389.v2.5U.G0296400/AeUmb.PI5…	65	0.722222
BP	GO:0044283	small molecule biosynthetic process	36	0.5163	1.65822	0.00059134	0.00482032	0.00264075	1873	tags=78%, list=39%, signal=48%	AeUmb.PI554389.v2.6U.G0170300/AeUmb.PI554389.v2.1U.G0436800/AeUmb.PI554389.v2.6U.G0138600/AeUmb.PI554389.v2.6U.G0491000/AeUmb.PI554389.v2.2U.G0567700/AeUmb.PI554389.v2.4U.G0972100/AeUmb.PI554389.v2.5U.G0056600/AeUmb.PI554389.v2.6U.G0243600/AeUmb.PI554389.v2.6U.G0286000/AeUmb.PI554389.v2.6U.G0379800/AeUmb.PI554389.v2.2U.G0657100/AeUmb.PI554389.v2.5U.G0252200/AeUmb.PI554389.v2.6U.G0184600/AeUmb.PI5…	28	0.777778
MF	GO:0035639	purine ribonucleoside triphosphate binding	390	0.329912	1.24789	0.000627384	0.0050378	0.0027599	2198	tags=57%, list=46%, signal=34%	AeUmb.PI554389.v2.7U.G0273700/AeUmb.PI554389.v2.7U.G0151600/AeUmb.PI554389.v2.5U.G0424000/AeUmb.PI554389.v2.5U.G0541400/AeUmb.PI554389.v2.1U.G0174900/AeUmb.PI554389.v2.3U.G0246500/AeUmb.PI554389.v2.1U.G0254000/AeUmb.PI554389.v2.3U.G0047200/AeUmb.PI554389.v2.2U.G0460800/AeUmb.PI554389.v2.5U.G0894200/AeUmb.PI554389.v2.2U.G0158000/AeUmb.PI554389.v2.5U.G0237300/AeUmb.PI554389.v2.6U.G0501600/AeUmb.PI5…	223	0.571795
MF	GO:0019787	ubiquitin-like protein transferase activity	32	0.531501	1.68262	0.000683293	0.00540605	0.00296164	1639	tags=75%, list=34%, signal=50%	AeUmb.PI554389.v2.6U.G0566800/AeUmb.PI554389.v2.1U.G0284300/AeUmb.PI554389.v2.1U.G0260700/AeUmb.PI554389.v2.6U.G0518600/AeUmb.PI554389.v2.6U.G0251300/AeUmb.PI554389.v2.1U.G0117000/AeUmb.PI554389.v2.2U.G0646100/AeUmb.PI554389.v2.3U.G0501600/AeUmb.PI554389.v2.5U.G0795000/AeUmb.PI554389.v2.1U.G0395600/AeUmb.PI554389.v2.5U.G0169000/AeUmb.PI554389.v2.3U.G0101900/AeUmb.PI554389.v2.6U.G0585500/AeUmb.PI5…	24	0.75
BP	GO:0019438	aromatic compound biosynthetic process	218	0.35835	1.32502	0.00072813	0.0056773	0.00311024	2538	tags=71%, list=53%, signal=35%	AeUmb.PI554389.v2.5U.G0541400/AeUmb.PI554389.v2.2U.G0319500/AeUmb.PI554389.v2.3U.G0693800/AeUmb.PI554389.v2.4U.G0611700/AeUmb.PI554389.v2.1U.G0255100/AeUmb.PI554389.v2.1U.G0140800/AeUmb.PI554389.v2.4U.G0915500/AeUmb.PI554389.v2.2U.G0140100/AeUmb.PI554389.v2.2U.G0555700/AeUmb.PI554389.v2.5U.G0670500/AeUmb.PI554389.v2.4U.G0897300/AeUmb.PI554389.v2.5U.G0262900/AeUmb.PI554389.v2.4U.G0936800/AeUmb.PI5…	155	0.711009
CC	GO:0005740	mitochondrial envelope	14	0.657262	1.81657	0.000742123	0.00570375	0.00312473	1332	tags=86%, list=28%, signal=62%	AeUmb.PI554389.v2.5U.G0335400/AeUmb.PI554389.v2.5U.G0791500/AeUmb.PI554389.v2.3U.G0182800/AeUmb.PI554389.v2.5U.G0237400/AeUmb.PI554389.v2.7U.G0143200/AeUmb.PI554389.v2.6U.G0423400/AeUmb.PI554389.v2.7U.G1004300/AeUmb.PI554389.v2.1U.G0299400/AeUmb.PI554389.v2.3U.G0283900/AeUmb.PI554389.v2.4U.G0932400/AeUmb.PI554389.v2.1U.G0423600/AeUmb.PI554389.v2.4U.G0970100	12	0.857143
CC	GO:0098796	membrane protein complex	29	0.53449	1.66906	0.000757652	0.00571964	0.00313344	1478	tags=66%, list=31%, signal=46%	AeUmb.PI554389.v2.3U.G0195000/AeUmb.PI554389.v2.7U.G0273700/AeUmb.PI554389.v2.2U.G0131000/AeUmb.PI554389.v2.2U.G0057300/AeUmb.PI554389.v2.3U.G0224900/AeUmb.PI554389.v2.5U.G0237400/AeUmb.PI554389.v2.6U.G0277200/AeUmb.PI554389.v2.2U.G0058700/AeUmb.PI554389.v2.1U.G0472700/AeUmb.PI554389.v2.4U.G0862700/AeUmb.PI554389.v2.7U.G0143200/AeUmb.PI554389.v2.1U.G0299400/AeUmb.PI554389.v2.3U.G0283900/AeUmb.PI5…	19	0.655172
BP	GO:0016071	mRNA metabolic process	35	0.515384	1.64996	0.000765454	0.00571964	0.00313344	1274	tags=66%, list=27%, signal=49%	AeUmb.PI554389.v2.7U.G0066800/AeUmb.PI554389.v2.1U.G0269200/AeUmb.PI554389.v2.4U.G0961100/AeUmb.PI554389.v2.1U.G0284300/AeUmb.PI554389.v2.4U.G0131200/AeUmb.PI554389.v2.7U.G0097400/AeUmb.PI554389.v2.4U.G0926200/AeUmb.PI554389.v2.7U.G0698900/AeUmb.PI554389.v2.2U.G0785400/AeUmb.PI554389.v2.7U.G0191700/AeUmb.PI554389.v2.4U.G0576600/AeUmb.PI554389.v2.7U.G0155400/AeUmb.PI554389.v2.6U.G0181400/AeUmb.PI5…	23	0.657143
MF	GO:0003924	GTPase activity	20	0.59343	1.753	0.00082165	0.00589397	0.00322894	1497	tags=80%, list=31%, signal=55%	AeUmb.PI554389.v2.6U.G0195800/AeUmb.PI554389.v2.5U.G0791500/AeUmb.PI554389.v2.7U.G0008200/AeUmb.PI554389.v2.1U.G0323500/AeUmb.PI554389.v2.5U.G0068400/AeUmb.PI554389.v2.5U.G0706300/AeUmb.PI554389.v2.1U.G0573300/AeUmb.PI554389.v2.4U.G1023200/AeUmb.PI554389.v2.5U.G0141300/AeUmb.PI554389.v2.4U.G0939600/AeUmb.PI554389.v2.4U.G0524900/AeUmb.PI554389.v2.4U.G0758600/AeUmb.PI554389.v2.7U.G0255800/AeUmb.PI5…	16	0.8
BP	GO:0015031	protein transport	29	0.533022	1.66448	0.000803569	0.00589397	0.00322894	1637	tags=72%, list=34%, signal=48%	AeUmb.PI554389.v2.4U.G0983100/AeUmb.PI554389.v2.6U.G0195800/AeUmb.PI554389.v2.7U.G0794900/AeUmb.PI554389.v2.3U.G0016100/AeUmb.PI554389.v2.4U.G0264500/AeUmb.PI554389.v2.1U.G0450000/AeUmb.PI554389.v2.7U.G0235700/AeUmb.PI554389.v2.3U.G0078600/AeUmb.PI554389.v2.6U.G0443700/AeUmb.PI554389.v2.2U.G0058700/AeUmb.PI554389.v2.1U.G0472700/AeUmb.PI554389.v2.1U.G0283600/AeUmb.PI554389.v2.7U.G0157300/AeUmb.PI5…	21	0.724138
BP	GO:0071840	cellular component organization or biogenesis	127	0.384101	1.38031	0.000819718	0.00589397	0.00322894	1893	tags=57%, list=40%, signal=35%	AeUmb.PI554389.v2.4U.G0145000/AeUmb.PI554389.v2.5U.G0791500/AeUmb.PI554389.v2.6U.G0556200/AeUmb.PI554389.v2.2U.G0074500/AeUmb.PI554389.v2.5U.G0324300/AeUmb.PI554389.v2.4U.G0131200/AeUmb.PI554389.v2.2U.G0108900/AeUmb.PI554389.v2.2U.G0345000/AeUmb.PI554389.v2.4U.G1016600/AeUmb.PI554389.v2.4U.G0264500/AeUmb.PI554389.v2.5U.G0718300/AeUmb.PI554389.v2.2U.G0136400/AeUmb.PI554389.v2.1U.G0334400/AeUmb.PI5…	72	0.566929
CC	GO:0005739	mitochondrion	18	0.613955	1.77997	0.000882003	0.00616257	0.00337609	1332	tags=72%, list=28%, signal=52%	AeUmb.PI554389.v2.5U.G0335400/AeUmb.PI554389.v2.5U.G0791500/AeUmb.PI554389.v2.2U.G0057300/AeUmb.PI554389.v2.3U.G0182800/AeUmb.PI554389.v2.5U.G0237400/AeUmb.PI554389.v2.7U.G0143200/AeUmb.PI554389.v2.6U.G0423400/AeUmb.PI554389.v2.7U.G1004300/AeUmb.PI554389.v2.1U.G0299400/AeUmb.PI554389.v2.3U.G0283900/AeUmb.PI554389.v2.4U.G0932400/AeUmb.PI554389.v2.1U.G0423600/AeUmb.PI554389.v2.4U.G0970100	13	0.722222
BP	GO:0033036	macromolecule localization	48	0.474154	1.57213	0.000874845	0.00616257	0.00337609	1764	tags=69%, list=37%, signal=44%	AeUmb.PI554389.v2.4U.G0983100/AeUmb.PI554389.v2.6U.G0195800/AeUmb.PI554389.v2.3U.G0661200/AeUmb.PI554389.v2.7U.G0794900/AeUmb.PI554389.v2.3U.G0016100/AeUmb.PI554389.v2.4U.G0264500/AeUmb.PI554389.v2.5U.G0718300/AeUmb.PI554389.v2.1U.G0450000/AeUmb.PI554389.v2.7U.G0235700/AeUmb.PI554389.v2.3U.G0078600/AeUmb.PI554389.v2.6U.G0443700/AeUmb.PI554389.v2.2U.G0058700/AeUmb.PI554389.v2.1U.G0472700/AeUmb.PI5…	33	0.6875
MF	GO:0005525	GTP binding	24	0.556299	1.68982	0.000908231	0.00618517	0.00338847	1581	tags=79%, list=33%, signal=53%	AeUmb.PI554389.v2.6U.G0195800/AeUmb.PI554389.v2.5U.G0791500/AeUmb.PI554389.v2.3U.G0661200/AeUmb.PI554389.v2.4U.G0630900/AeUmb.PI554389.v2.7U.G0008200/AeUmb.PI554389.v2.1U.G0323500/AeUmb.PI554389.v2.5U.G0068400/AeUmb.PI554389.v2.5U.G0706300/AeUmb.PI554389.v2.1U.G0573300/AeUmb.PI554389.v2.4U.G1023200/AeUmb.PI554389.v2.7U.G0398200/AeUmb.PI554389.v2.4U.G0939600/AeUmb.PI554389.v2.4U.G0758600/AeUmb.PI5…	19	0.791667
MF	GO:0032561	guanyl ribonucleotide binding	24	0.556299	1.68982	0.000908231	0.00618517	0.00338847	1581	tags=79%, list=33%, signal=53%	AeUmb.PI554389.v2.6U.G0195800/AeUmb.PI554389.v2.5U.G0791500/AeUmb.PI554389.v2.3U.G0661200/AeUmb.PI554389.v2.4U.G0630900/AeUmb.PI554389.v2.7U.G0008200/AeUmb.PI554389.v2.1U.G0323500/AeUmb.PI554389.v2.5U.G0068400/AeUmb.PI554389.v2.5U.G0706300/AeUmb.PI554389.v2.1U.G0573300/AeUmb.PI554389.v2.4U.G1023200/AeUmb.PI554389.v2.7U.G0398200/AeUmb.PI554389.v2.4U.G0939600/AeUmb.PI554389.v2.4U.G0758600/AeUmb.PI5…	19	0.791667
BP	GO:0032787	monocarboxylic acid metabolic process	27	0.544608	1.68583	0.000969832	0.00640612	0.00350952	1336	tags=70%, list=28%, signal=51%	AeUmb.PI554389.v2.5U.G0511800/AeUmb.PI554389.v2.3U.G0223200/AeUmb.PI554389.v2.1U.G0580800/AeUmb.PI554389.v2.3U.G0481800/AeUmb.PI554389.v2.6U.G0611800/AeUmb.PI554389.v2.6U.G0324900/AeUmb.PI554389.v2.5U.G0249200/AeUmb.PI554389.v2.6U.G0379800/AeUmb.PI554389.v2.4U.G0248600/AeUmb.PI554389.v2.2U.G0892100/AeUmb.PI554389.v2.7U.G0680500/AeUmb.PI554389.v2.7U.G0861700/AeUmb.PI554389.v2.4U.G1009800/AeUmb.PI5…	19	0.703704
BP	GO:0016053	organic acid biosynthetic process	27	0.543381	1.68203	0.000988305	0.00640612	0.00350952	1811	tags=78%, list=38%, signal=49%	AeUmb.PI554389.v2.6U.G0170300/AeUmb.PI554389.v2.1U.G0436800/AeUmb.PI554389.v2.6U.G0138600/AeUmb.PI554389.v2.2U.G0567700/AeUmb.PI554389.v2.5U.G0056600/AeUmb.PI554389.v2.6U.G0243600/AeUmb.PI554389.v2.6U.G0286000/AeUmb.PI554389.v2.6U.G0379800/AeUmb.PI554389.v2.2U.G0657100/AeUmb.PI554389.v2.5U.G0252200/AeUmb.PI554389.v2.7U.G0680500/AeUmb.PI554389.v2.4U.G1009800/AeUmb.PI554389.v2.5U.G0051200/AeUmb.PI5…	21	0.777778
BP	GO:0046394	carboxylic acid biosynthetic process	27	0.543381	1.68203	0.000988305	0.00640612	0.00350952	1811	tags=78%, list=38%, signal=49%	AeUmb.PI554389.v2.6U.G0170300/AeUmb.PI554389.v2.1U.G0436800/AeUmb.PI554389.v2.6U.G0138600/AeUmb.PI554389.v2.2U.G0567700/AeUmb.PI554389.v2.5U.G0056600/AeUmb.PI554389.v2.6U.G0243600/AeUmb.PI554389.v2.6U.G0286000/AeUmb.PI554389.v2.6U.G0379800/AeUmb.PI554389.v2.2U.G0657100/AeUmb.PI554389.v2.5U.G0252200/AeUmb.PI554389.v2.7U.G0680500/AeUmb.PI554389.v2.4U.G1009800/AeUmb.PI554389.v2.5U.G0051200/AeUmb.PI5…	21	0.777778
MF	GO:0004842	ubiquitin-protein transferase activity	30	0.521136	1.63598	0.000968569	0.00640612	0.00350952	1776	tags=77%, list=37%, signal=48%	AeUmb.PI554389.v2.6U.G0566800/AeUmb.PI554389.v2.1U.G0284300/AeUmb.PI554389.v2.1U.G0260700/AeUmb.PI554389.v2.6U.G0518600/AeUmb.PI554389.v2.6U.G0251300/AeUmb.PI554389.v2.2U.G0646100/AeUmb.PI554389.v2.3U.G0501600/AeUmb.PI554389.v2.5U.G0795000/AeUmb.PI554389.v2.5U.G0169000/AeUmb.PI554389.v2.3U.G0101900/AeUmb.PI554389.v2.6U.G0585500/AeUmb.PI554389.v2.3U.G0331200/AeUmb.PI554389.v2.1U.G0312600/AeUmb.PI5…	23	0.766667
MF	GO:0015078	proton transmembrane transporter activity	21	0.58277	1.73455	0.00105281	0.00674298	0.00369406	961	tags=62%, list=20%, signal=50%	AeUmb.PI554389.v2.3U.G0195000/AeUmb.PI554389.v2.7U.G0273700/AeUmb.PI554389.v2.2U.G0131000/AeUmb.PI554389.v2.6U.G0460100/AeUmb.PI554389.v2.3U.G0224900/AeUmb.PI554389.v2.5U.G0836500/AeUmb.PI554389.v2.6U.G0598500/AeUmb.PI554389.v2.4U.G0432400/AeUmb.PI554389.v2.5U.G0316300/AeUmb.PI554389.v2.3U.G0283900/AeUmb.PI554389.v2.7U.G1028000/AeUmb.PI554389.v2.2U.G0475900/AeUmb.PI554389.v2.2U.G0672700	13	0.619048
MF	GO:0015318	inorganic molecular entity transmembrane transporter activity	51	0.464784	1.55119	0.00107699	0.00681673	0.00373446	1812	tags=67%, list=38%, signal=42%	AeUmb.PI554389.v2.3U.G0195000/AeUmb.PI554389.v2.7U.G0273700/AeUmb.PI554389.v2.2U.G0131000/AeUmb.PI554389.v2.3U.G0018900/AeUmb.PI554389.v2.4U.G0710500/AeUmb.PI554389.v2.6U.G0460100/AeUmb.PI554389.v2.3U.G0224900/AeUmb.PI554389.v2.5U.G0671900/AeUmb.PI554389.v2.5U.G0836500/AeUmb.PI554389.v2.2U.G0158700/AeUmb.PI554389.v2.7U.G0319200/AeUmb.PI554389.v2.2U.G0681500/AeUmb.PI554389.v2.6U.G0598500/AeUmb.PI5…	34	0.666667
MF	GO:0016874	ligase activity	32	0.521429	1.65073	0.00109683	0.00686156	0.00375902	1491	tags=66%, list=31%, signal=45%	AeUmb.PI554389.v2.3U.G0223200/AeUmb.PI554389.v2.5U.G0256700/AeUmb.PI554389.v2.2U.G0567700/AeUmb.PI554389.v2.6U.G0598500/AeUmb.PI554389.v2.5U.G0249200/AeUmb.PI554389.v2.7U.G0181700/AeUmb.PI554389.v2.5U.G0425400/AeUmb.PI554389.v2.1U.G0167500/AeUmb.PI554389.v2.3U.G0283900/AeUmb.PI554389.v2.6U.G0379800/AeUmb.PI554389.v2.2U.G0268000/AeUmb.PI554389.v2.5U.G0190400/AeUmb.PI554389.v2.7U.G0602200/AeUmb.PI5…	21	0.65625
MF	GO:0008135	translation factor activity, RNA binding	14	0.642363	1.7754	0.00118757	0.00717876	0.0039328	1310	tags=79%, list=27%, signal=57%	AeUmb.PI554389.v2.5U.G0444300/AeUmb.PI554389.v2.2U.G0137500/AeUmb.PI554389.v2.2U.G0136400/AeUmb.PI554389.v2.5U.G0706300/AeUmb.PI554389.v2.6U.G0678600/AeUmb.PI554389.v2.6U.G0246900/AeUmb.PI554389.v2.6U.G0460500/AeUmb.PI554389.v2.7U.G0081800/AeUmb.PI554389.v2.7U.G0874300/AeUmb.PI554389.v2.4U.G0742500/AeUmb.PI554389.v2.5U.G0747800	11	0.785714
MF	GO:0045182	translation regulator activity	14	0.642363	1.7754	0.00118757	0.00717876	0.0039328	1310	tags=79%, list=27%, signal=57%	AeUmb.PI554389.v2.5U.G0444300/AeUmb.PI554389.v2.2U.G0137500/AeUmb.PI554389.v2.2U.G0136400/AeUmb.PI554389.v2.5U.G0706300/AeUmb.PI554389.v2.6U.G0678600/AeUmb.PI554389.v2.6U.G0246900/AeUmb.PI554389.v2.6U.G0460500/AeUmb.PI554389.v2.7U.G0081800/AeUmb.PI554389.v2.7U.G0874300/AeUmb.PI554389.v2.4U.G0742500/AeUmb.PI554389.v2.5U.G0747800	11	0.785714
MF	GO:0090079	translation regulator activity, nucleic acid binding	14	0.642363	1.7754	0.00118757	0.00717876	0.0039328	1310	tags=79%, list=27%, signal=57%	AeUmb.PI554389.v2.5U.G0444300/AeUmb.PI554389.v2.2U.G0137500/AeUmb.PI554389.v2.2U.G0136400/AeUmb.PI554389.v2.5U.G0706300/AeUmb.PI554389.v2.6U.G0678600/AeUmb.PI554389.v2.6U.G0246900/AeUmb.PI554389.v2.6U.G0460500/AeUmb.PI554389.v2.7U.G0081800/AeUmb.PI554389.v2.7U.G0874300/AeUmb.PI554389.v2.4U.G0742500/AeUmb.PI554389.v2.5U.G0747800	11	0.785714
BP	GO:0098655	monoatomic cation transmembrane transport	27	0.53866	1.66742	0.00128387	0.00759032	0.00415827	1478	tags=70%, list=31%, signal=49%	AeUmb.PI554389.v2.3U.G0195000/AeUmb.PI554389.v2.7U.G0273700/AeUmb.PI554389.v2.2U.G0131000/AeUmb.PI554389.v2.3U.G0224900/AeUmb.PI554389.v2.5U.G0671900/AeUmb.PI554389.v2.5U.G0836500/AeUmb.PI554389.v2.2U.G0158700/AeUmb.PI554389.v2.7U.G0319200/AeUmb.PI554389.v2.2U.G0681500/AeUmb.PI554389.v2.2U.G0214600/AeUmb.PI554389.v2.4U.G0432400/AeUmb.PI554389.v2.5U.G0316300/AeUmb.PI554389.v2.5U.G0147600/AeUmb.PI5…	19	0.703704
BP	GO:0098662	inorganic cation transmembrane transport	27	0.53866	1.66742	0.00128387	0.00759032	0.00415827	1478	tags=70%, list=31%, signal=49%	AeUmb.PI554389.v2.3U.G0195000/AeUmb.PI554389.v2.7U.G0273700/AeUmb.PI554389.v2.2U.G0131000/AeUmb.PI554389.v2.3U.G0224900/AeUmb.PI554389.v2.5U.G0671900/AeUmb.PI554389.v2.5U.G0836500/AeUmb.PI554389.v2.2U.G0158700/AeUmb.PI554389.v2.7U.G0319200/AeUmb.PI554389.v2.2U.G0681500/AeUmb.PI554389.v2.2U.G0214600/AeUmb.PI554389.v2.4U.G0432400/AeUmb.PI554389.v2.5U.G0316300/AeUmb.PI554389.v2.5U.G0147600/AeUmb.PI5…	19	0.703704
BP	GO:0043604	amide biosynthetic process	39	0.484213	1.56848	0.00131698	0.00770146	0.00421915	1342	tags=59%, list=28%, signal=43%	AeUmb.PI554389.v2.6U.G0611800/AeUmb.PI554389.v2.5U.G0256700/AeUmb.PI554389.v2.2U.G0136400/AeUmb.PI554389.v2.5U.G0706300/AeUmb.PI554389.v2.6U.G0246900/AeUmb.PI554389.v2.7U.G0181700/AeUmb.PI554389.v2.3U.G0087400/AeUmb.PI554389.v2.7U.G0531700/AeUmb.PI554389.v2.4U.G0833100/AeUmb.PI554389.v2.1U.G0167500/AeUmb.PI554389.v2.3U.G0101900/AeUmb.PI554389.v2.6U.G0379800/AeUmb.PI554389.v2.7U.G0081800/AeUmb.PI5…	23	0.589744
BP	GO:0044255	cellular lipid metabolic process	58	0.454567	1.53446	0.00148201	0.00848213	0.00464683	2122	tags=76%, list=44%, signal=43%	AeUmb.PI554389.v2.4U.G1018800/AeUmb.PI554389.v2.2U.G0103300/AeUmb.PI554389.v2.5U.G0030100/AeUmb.PI554389.v2.3U.G0223200/AeUmb.PI554389.v2.5U.G0883100/AeUmb.PI554389.v2.3U.G0481800/AeUmb.PI554389.v2.2U.G0885900/AeUmb.PI554389.v2.5U.G0121100/AeUmb.PI554389.v2.3U.G0029700/AeUmb.PI554389.v2.1U.G0287000/AeUmb.PI554389.v2.4U.G0235900/AeUmb.PI554389.v2.3U.G0519000/AeUmb.PI554389.v2.5U.G0249200/AeUmb.PI5…	44	0.758621
BP	GO:0016043	cellular component organization	109	0.38865	1.38262	0.00148186	0.00848213	0.00464683	1684	tags=52%, list=35%, signal=35%	AeUmb.PI554389.v2.4U.G0145000/AeUmb.PI554389.v2.5U.G0791500/AeUmb.PI554389.v2.6U.G0556200/AeUmb.PI554389.v2.2U.G0074500/AeUmb.PI554389.v2.5U.G0324300/AeUmb.PI554389.v2.4U.G0131200/AeUmb.PI554389.v2.2U.G0108900/AeUmb.PI554389.v2.2U.G0345000/AeUmb.PI554389.v2.4U.G1016600/AeUmb.PI554389.v2.4U.G0264500/AeUmb.PI554389.v2.5U.G0718300/AeUmb.PI554389.v2.2U.G0136400/AeUmb.PI554389.v2.1U.G0334400/AeUmb.PI5…	57	0.522936
BP	GO:0015980	energy derivation by oxidation of organic compounds	16	0.614932	1.74499	0.0015752	0.0089206	0.00488704	1708	tags=94%, list=36%, signal=60%	AeUmb.PI554389.v2.6U.G0437300/AeUmb.PI554389.v2.6U.G0309500/AeUmb.PI554389.v2.7U.G0145200/AeUmb.PI554389.v2.5U.G0237400/AeUmb.PI554389.v2.5U.G0175000/AeUmb.PI554389.v2.6U.G0400600/AeUmb.PI554389.v2.6U.G0437400/AeUmb.PI554389.v2.6U.G0451400/AeUmb.PI554389.v2.7U.G0143200/AeUmb.PI554389.v2.4U.G0932400/AeUmb.PI554389.v2.4U.G0962500/AeUmb.PI554389.v2.1U.G0423600/AeUmb.PI554389.v2.2U.G0755300/AeUmb.PI5…	15	0.9375
BP	GO:0090407	organophosphate biosynthetic process	32	0.513475	1.62555	0.00161297	0.00903937	0.00495211	1478	tags=66%, list=31%, signal=46%	AeUmb.PI554389.v2.5U.G0541400/AeUmb.PI554389.v2.4U.G1018800/AeUmb.PI554389.v2.4U.G0915500/AeUmb.PI554389.v2.5U.G0883100/AeUmb.PI554389.v2.5U.G0121100/AeUmb.PI554389.v2.6U.G0611800/AeUmb.PI554389.v2.3U.G0276000/AeUmb.PI554389.v2.6U.G0598500/AeUmb.PI554389.v2.6U.G0563300/AeUmb.PI554389.v2.5U.G0425400/AeUmb.PI554389.v2.4U.G0972100/AeUmb.PI554389.v2.3U.G0283900/AeUmb.PI554389.v2.2U.G0268000/AeUmb.PI5…	21	0.65625
BP	GO:0006397	mRNA processing	33	0.499673	1.58889	0.00172306	0.00955675	0.00523555	1274	tags=64%, list=27%, signal=47%	AeUmb.PI554389.v2.7U.G0066800/AeUmb.PI554389.v2.1U.G0269200/AeUmb.PI554389.v2.4U.G0961100/AeUmb.PI554389.v2.1U.G0284300/AeUmb.PI554389.v2.4U.G0131200/AeUmb.PI554389.v2.7U.G0097400/AeUmb.PI554389.v2.4U.G0926200/AeUmb.PI554389.v2.2U.G0785400/AeUmb.PI554389.v2.7U.G0191700/AeUmb.PI554389.v2.4U.G0576600/AeUmb.PI554389.v2.7U.G0155400/AeUmb.PI554389.v2.6U.G0181400/AeUmb.PI554389.v2.5U.G0000200/AeUmb.PI5…	21	0.636364
MF	GO:0016817	hydrolase activity, acting on acid anhydrides	101	0.391232	1.3845	0.00179479	0.00968303	0.00530473	1790	tags=57%, list=37%, signal=37%	AeUmb.PI554389.v2.7U.G0151600/AeUmb.PI554389.v2.6U.G0195800/AeUmb.PI554389.v2.5U.G0791500/AeUmb.PI554389.v2.6U.G0384700/AeUmb.PI554389.v2.3U.G0661200/AeUmb.PI554389.v2.7U.G0726500/AeUmb.PI554389.v2.4U.G0926200/AeUmb.PI554389.v2.7U.G0008200/AeUmb.PI554389.v2.2U.G0302800/AeUmb.PI554389.v2.2U.G0785400/AeUmb.PI554389.v2.7U.G0298800/AeUmb.PI554389.v2.2U.G0743100/AeUmb.PI554389.v2.1U.G0323500/AeUmb.PI5…	58	0.574257
BP	GO:0050794	regulation of cellular process	253	0.346934	1.2909	0.00179982	0.00968303	0.00530473	2398	tags=66%, list=50%, signal=35%	AeUmb.PI554389.v2.7U.G0066800/AeUmb.PI554389.v2.2U.G0319500/AeUmb.PI554389.v2.4U.G0611700/AeUmb.PI554389.v2.5U.G0237000/AeUmb.PI554389.v2.5U.G0791500/AeUmb.PI554389.v2.1U.G0140800/AeUmb.PI554389.v2.2U.G0140100/AeUmb.PI554389.v2.1U.G0260700/AeUmb.PI554389.v2.6U.G0283900/AeUmb.PI554389.v2.5U.G0670500/AeUmb.PI554389.v2.7U.G0698900/AeUmb.PI554389.v2.4U.G0897300/AeUmb.PI554389.v2.5U.G0262900/AeUmb.PI5…	167	0.660079
BP	GO:0036211	protein modification process	298	0.340866	1.27708	0.00179982	0.00968303	0.00530473	2373	tags=63%, list=50%, signal=34%	AeUmb.PI554389.v2.5U.G0424000/AeUmb.PI554389.v2.1U.G0174900/AeUmb.PI554389.v2.3U.G0246500/AeUmb.PI554389.v2.1U.G0254000/AeUmb.PI554389.v2.3U.G0047200/AeUmb.PI554389.v2.2U.G0460800/AeUmb.PI554389.v2.2U.G0683500/AeUmb.PI554389.v2.2U.G0158000/AeUmb.PI554389.v2.5U.G0237300/AeUmb.PI554389.v2.6U.G0501600/AeUmb.PI554389.v2.4U.G0742900/AeUmb.PI554389.v2.6U.G0566800/AeUmb.PI554389.v2.7U.G0761300/AeUmb.PI5…	189	0.634228
MF	GO:0019829	ATPase-coupled monoatomic cation transmembrane transporter activity	12	0.652517	1.74912	0.00199332	0.010548	0.00577858	1409	tags=92%, list=29%, signal=65%	AeUmb.PI554389.v2.3U.G0195000/AeUmb.PI554389.v2.7U.G0273700/AeUmb.PI554389.v2.2U.G0131000/AeUmb.PI554389.v2.3U.G0224900/AeUmb.PI554389.v2.6U.G0149900/AeUmb.PI554389.v2.7U.G0070300/AeUmb.PI554389.v2.5U.G0147600/AeUmb.PI554389.v2.6U.G0381100/AeUmb.PI554389.v2.2U.G0422000/AeUmb.PI554389.v2.2U.G0457500/AeUmb.PI554389.v2.6U.G0364100	11	0.916667
BP	GO:0050789	regulation of biological process	263	0.344409	1.28351	0.0019998	0.010548	0.00577858	2545	tags=69%, list=53%, signal=34%	AeUmb.PI554389.v2.7U.G0066800/AeUmb.PI554389.v2.2U.G0319500/AeUmb.PI554389.v2.4U.G0611700/AeUmb.PI554389.v2.5U.G0237000/AeUmb.PI554389.v2.5U.G0791500/AeUmb.PI554389.v2.1U.G0140800/AeUmb.PI554389.v2.2U.G0140100/AeUmb.PI554389.v2.1U.G0260700/AeUmb.PI554389.v2.6U.G0283900/AeUmb.PI554389.v2.5U.G0670500/AeUmb.PI554389.v2.7U.G0698900/AeUmb.PI554389.v2.4U.G0897300/AeUmb.PI554389.v2.5U.G0262900/AeUmb.PI5…	182	0.692015
MF	GO:0061630	ubiquitin protein ligase activity	16	0.602988	1.71109	0.00204939	0.0107046	0.00586438	806	tags=69%, list=17%, signal=57%	AeUmb.PI554389.v2.6U.G0566800/AeUmb.PI554389.v2.1U.G0284300/AeUmb.PI554389.v2.1U.G0260700/AeUmb.PI554389.v2.6U.G0251300/AeUmb.PI554389.v2.3U.G0501600/AeUmb.PI554389.v2.5U.G0795000/AeUmb.PI554389.v2.3U.G0101900/AeUmb.PI554389.v2.3U.G0331200/AeUmb.PI554389.v2.1U.G0312600/AeUmb.PI554389.v2.4U.G1006800/AeUmb.PI554389.v2.1U.G0224800	11	0.6875
BP	GO:0043687	post-translational protein modification	35	0.492021	1.57517	0.00210168	0.0107686	0.00589946	1185	tags=51%, list=25%, signal=39%	AeUmb.PI554389.v2.6U.G0566800/AeUmb.PI554389.v2.1U.G0284300/AeUmb.PI554389.v2.1U.G0559900/AeUmb.PI554389.v2.6U.G0430400/AeUmb.PI554389.v2.3U.G0020900/AeUmb.PI554389.v2.1U.G0117000/AeUmb.PI554389.v2.2U.G0646100/AeUmb.PI554389.v2.3U.G0158900/AeUmb.PI554389.v2.2U.G0185400/AeUmb.PI554389.v2.5U.G0169000/AeUmb.PI554389.v2.6U.G0585500/AeUmb.PI554389.v2.1U.G0312600/AeUmb.PI554389.v2.6U.G0196300/AeUmb.PI5…	18	0.514286
BP	GO:0070647	protein modification by small protein conjugation or removal	35	0.492021	1.57517	0.00210168	0.0107686	0.00589946	1185	tags=51%, list=25%, signal=39%	AeUmb.PI554389.v2.6U.G0566800/AeUmb.PI554389.v2.1U.G0284300/AeUmb.PI554389.v2.1U.G0559900/AeUmb.PI554389.v2.6U.G0430400/AeUmb.PI554389.v2.3U.G0020900/AeUmb.PI554389.v2.1U.G0117000/AeUmb.PI554389.v2.2U.G0646100/AeUmb.PI554389.v2.3U.G0158900/AeUmb.PI554389.v2.2U.G0185400/AeUmb.PI554389.v2.5U.G0169000/AeUmb.PI554389.v2.6U.G0585500/AeUmb.PI554389.v2.1U.G0312600/AeUmb.PI554389.v2.6U.G0196300/AeUmb.PI5…	18	0.514286
BP	GO:0000723	telomere maintenance	13	-0.527685	-1.949	0.00216622	0.0108918	0.00596696	2266	tags=100%, list=47%, signal=53%	AeUmb.PI554389.v2.6U.G0310900/AeUmb.PI554389.v2.6U.G0358100/AeUmb.PI554389.v2.1U.G0373300/AeUmb.PI554389.v2.6U.G0454000/AeUmb.PI554389.v2.1U.G0467100/AeUmb.PI554389.v2.5U.G0037400/AeUmb.PI554389.v2.7U.G1038300/AeUmb.PI554389.v2.1U.G0127100/AeUmb.PI554389.v2.7U.G0819400/AeUmb.PI554389.v2.2U.G0457300/AeUmb.PI554389.v2.2U.G0692900/AeUmb.PI554389.v2.7U.G0498900	12	0.923077
BP	GO:0032200	telomere organization	13	-0.527685	-1.949	0.00216622	0.0108918	0.00596696	2266	tags=100%, list=47%, signal=53%	AeUmb.PI554389.v2.6U.G0310900/AeUmb.PI554389.v2.6U.G0358100/AeUmb.PI554389.v2.1U.G0373300/AeUmb.PI554389.v2.6U.G0454000/AeUmb.PI554389.v2.1U.G0467100/AeUmb.PI554389.v2.5U.G0037400/AeUmb.PI554389.v2.7U.G1038300/AeUmb.PI554389.v2.1U.G0127100/AeUmb.PI554389.v2.7U.G0819400/AeUmb.PI554389.v2.2U.G0457300/AeUmb.PI554389.v2.2U.G0692900/AeUmb.PI554389.v2.7U.G0498900	12	0.923077
BP	GO:0043412	macromolecule modification	322	0.334308	1.25634	0.00219978	0.0109582	0.0060033	2373	tags=63%, list=50%, signal=34%	AeUmb.PI554389.v2.7U.G0066800/AeUmb.PI554389.v2.5U.G0424000/AeUmb.PI554389.v2.1U.G0174900/AeUmb.PI554389.v2.3U.G0246500/AeUmb.PI554389.v2.1U.G0254000/AeUmb.PI554389.v2.3U.G0047200/AeUmb.PI554389.v2.2U.G0460800/AeUmb.PI554389.v2.2U.G0683500/AeUmb.PI554389.v2.2U.G0158000/AeUmb.PI554389.v2.5U.G0237300/AeUmb.PI554389.v2.6U.G0501600/AeUmb.PI554389.v2.4U.G0742900/AeUmb.PI554389.v2.6U.G0566800/AeUmb.PI5…	202	0.627329
BP	GO:0006886	intracellular protein transport	21	0.550934	1.6398	0.00222672	0.0109906	0.00602107	1637	tags=76%, list=34%, signal=50%	AeUmb.PI554389.v2.4U.G0983100/AeUmb.PI554389.v2.7U.G0794900/AeUmb.PI554389.v2.3U.G0016100/AeUmb.PI554389.v2.4U.G0264500/AeUmb.PI554389.v2.7U.G0235700/AeUmb.PI554389.v2.3U.G0078600/AeUmb.PI554389.v2.2U.G0058700/AeUmb.PI554389.v2.1U.G0472700/AeUmb.PI554389.v2.1U.G0283600/AeUmb.PI554389.v2.7U.G0157300/AeUmb.PI554389.v2.3U.G0110600/AeUmb.PI554389.v2.4U.G0893900/AeUmb.PI554389.v2.7U.G0205600/AeUmb.PI5…	16	0.761905
BP	GO:0045333	cellular respiration	15	0.612454	1.71553	0.00247168	0.0119027	0.00652073	1708	tags=93%, list=36%, signal=60%	AeUmb.PI554389.v2.6U.G0437300/AeUmb.PI554389.v2.6U.G0309500/AeUmb.PI554389.v2.5U.G0237400/AeUmb.PI554389.v2.5U.G0175000/AeUmb.PI554389.v2.6U.G0400600/AeUmb.PI554389.v2.6U.G0437400/AeUmb.PI554389.v2.6U.G0451400/AeUmb.PI554389.v2.7U.G0143200/AeUmb.PI554389.v2.4U.G0932400/AeUmb.PI554389.v2.4U.G0962500/AeUmb.PI554389.v2.1U.G0423600/AeUmb.PI554389.v2.2U.G0755300/AeUmb.PI554389.v2.3U.G0063200/AeUmb.PI5…	14	0.933333
MF	GO:0008324	monoatomic cation transmembrane transporter activity	53	0.447822	1.50053	0.0025	0.0119027	0.00652073	1880	tags=68%, list=39%, signal=42%	AeUmb.PI554389.v2.3U.G0195000/AeUmb.PI554389.v2.7U.G0273700/AeUmb.PI554389.v2.2U.G0131000/AeUmb.PI554389.v2.3U.G0018900/AeUmb.PI554389.v2.6U.G0460100/AeUmb.PI554389.v2.3U.G0224900/AeUmb.PI554389.v2.5U.G0671900/AeUmb.PI554389.v2.5U.G0836500/AeUmb.PI554389.v2.2U.G0158700/AeUmb.PI554389.v2.7U.G0319200/AeUmb.PI554389.v2.6U.G0149900/AeUmb.PI554389.v2.2U.G0681500/AeUmb.PI554389.v2.6U.G0598500/AeUmb.PI5…	36	0.679245
MF	GO:0015075	monoatomic ion transmembrane transporter activity	68	0.418079	1.43175	0.00249975	0.0119027	0.00652073	1744	tags=62%, list=36%, signal=40%	AeUmb.PI554389.v2.3U.G0195000/AeUmb.PI554389.v2.7U.G0273700/AeUmb.PI554389.v2.2U.G0131000/AeUmb.PI554389.v2.3U.G0018900/AeUmb.PI554389.v2.5U.G0335400/AeUmb.PI554389.v2.4U.G0710500/AeUmb.PI554389.v2.2U.G0495500/AeUmb.PI554389.v2.6U.G0460100/AeUmb.PI554389.v2.3U.G0182800/AeUmb.PI554389.v2.3U.G0224900/AeUmb.PI554389.v2.5U.G0671900/AeUmb.PI554389.v2.5U.G0836500/AeUmb.PI554389.v2.2U.G0158700/AeUmb.PI5…	42	0.617647
MF	GO:0016818	hydrolase activity, acting on acid anhydrides, in phosphorus-containing anhydrides	100	0.388255	1.37286	0.00249975	0.0119027	0.00652073	1790	tags=57%, list=37%, signal=36%	AeUmb.PI554389.v2.7U.G0151600/AeUmb.PI554389.v2.6U.G0195800/AeUmb.PI554389.v2.5U.G0791500/AeUmb.PI554389.v2.6U.G0384700/AeUmb.PI554389.v2.3U.G0661200/AeUmb.PI554389.v2.7U.G0726500/AeUmb.PI554389.v2.4U.G0926200/AeUmb.PI554389.v2.7U.G0008200/AeUmb.PI554389.v2.2U.G0302800/AeUmb.PI554389.v2.2U.G0785400/AeUmb.PI554389.v2.7U.G0298800/AeUmb.PI554389.v2.2U.G0743100/AeUmb.PI554389.v2.1U.G0323500/AeUmb.PI5…	57	0.57
BP	GO:0034654	nucleobase-containing compound biosynthetic process	203	0.351762	1.29616	0.00259974	0.0121623	0.00666295	2538	tags=70%, list=53%, signal=34%	AeUmb.PI554389.v2.5U.G0541400/AeUmb.PI554389.v2.2U.G0319500/AeUmb.PI554389.v2.3U.G0693800/AeUmb.PI554389.v2.4U.G0611700/AeUmb.PI554389.v2.1U.G0140800/AeUmb.PI554389.v2.4U.G0915500/AeUmb.PI554389.v2.2U.G0140100/AeUmb.PI554389.v2.5U.G0670500/AeUmb.PI554389.v2.4U.G0897300/AeUmb.PI554389.v2.5U.G0262900/AeUmb.PI554389.v2.4U.G0936800/AeUmb.PI554389.v2.5U.G0528800/AeUmb.PI554389.v2.7U.G0236500/AeUmb.PI5…	142	0.699507
BP	GO:0090304	nucleic acid metabolic process	335	0.331513	1.24736	0.00259974	0.0121623	0.00666295	2596	tags=67%, list=54%, signal=33%	AeUmb.PI554389.v2.5U.G0314300/AeUmb.PI554389.v2.7U.G0066800/AeUmb.PI554389.v2.2U.G0319500/AeUmb.PI554389.v2.3U.G0693800/AeUmb.PI554389.v2.1U.G0269200/AeUmb.PI554389.v2.4U.G0611700/AeUmb.PI554389.v2.4U.G0961100/AeUmb.PI554389.v2.1U.G0284300/AeUmb.PI554389.v2.1U.G0140800/AeUmb.PI554389.v2.2U.G0140100/AeUmb.PI554389.v2.4U.G0131200/AeUmb.PI554389.v2.7U.G0097400/AeUmb.PI554389.v2.7U.G0201200/AeUmb.PI5…	225	0.671642
BP	GO:0098660	inorganic ion transmembrane transport	28	0.512477	1.59275	0.00270894	0.0123509	0.00676631	1478	tags=68%, list=31%, signal=47%	AeUmb.PI554389.v2.3U.G0195000/AeUmb.PI554389.v2.7U.G0273700/AeUmb.PI554389.v2.2U.G0131000/AeUmb.PI554389.v2.3U.G0224900/AeUmb.PI554389.v2.5U.G0671900/AeUmb.PI554389.v2.5U.G0836500/AeUmb.PI554389.v2.2U.G0158700/AeUmb.PI554389.v2.7U.G0319200/AeUmb.PI554389.v2.2U.G0681500/AeUmb.PI554389.v2.2U.G0214600/AeUmb.PI554389.v2.4U.G0432400/AeUmb.PI554389.v2.5U.G0316300/AeUmb.PI554389.v2.5U.G0147600/AeUmb.PI5…	19	0.678571
MF	GO:0008289	lipid binding	37	0.479218	1.54372	0.00270162	0.0123509	0.00676631	1734	tags=68%, list=36%, signal=43%	AeUmb.PI554389.v2.4U.G0145000/AeUmb.PI554389.v2.5U.G0560700/AeUmb.PI554389.v2.7U.G0794900/AeUmb.PI554389.v2.4U.G0392400/AeUmb.PI554389.v2.5U.G0528800/AeUmb.PI554389.v2.2U.G0178300/AeUmb.PI554389.v2.7U.G0235700/AeUmb.PI554389.v2.3U.G0078600/AeUmb.PI554389.v2.7U.G0996000/AeUmb.PI554389.v2.1U.G0397600/AeUmb.PI554389.v2.6U.G0722500/AeUmb.PI554389.v2.5U.G0217600/AeUmb.PI554389.v2.7U.G0177700/AeUmb.PI5…	25	0.675676
BP	GO:0055086	nucleobase-containing small molecule metabolic process	39	0.470692	1.52468	0.00270135	0.0123509	0.00676631	2379	tags=87%, list=50%, signal=44%	AeUmb.PI554389.v2.7U.G0273700/AeUmb.PI554389.v2.5U.G0541400/AeUmb.PI554389.v2.4U.G0915500/AeUmb.PI554389.v2.1U.G0580800/AeUmb.PI554389.v2.6U.G0611800/AeUmb.PI554389.v2.3U.G0276000/AeUmb.PI554389.v2.6U.G0598500/AeUmb.PI554389.v2.3U.G0253900/AeUmb.PI554389.v2.6U.G0563300/AeUmb.PI554389.v2.5U.G0425400/AeUmb.PI554389.v2.3U.G0283900/AeUmb.PI554389.v2.1U.G0223100/AeUmb.PI554389.v2.4U.G0248600/AeUmb.PI5…	34	0.871795
BP	GO:0033365	protein localization to organelle	13	0.629633	1.71481	0.0028084	0.012591	0.00689784	1637	tags=92%, list=34%, signal=61%	AeUmb.PI554389.v2.3U.G0661200/AeUmb.PI554389.v2.7U.G0794900/AeUmb.PI554389.v2.4U.G0264500/AeUmb.PI554389.v2.7U.G0235700/AeUmb.PI554389.v2.3U.G0078600/AeUmb.PI554389.v2.4U.G0939600/AeUmb.PI554389.v2.1U.G0283600/AeUmb.PI554389.v2.1U.G0299400/AeUmb.PI554389.v2.7U.G0205600/AeUmb.PI554389.v2.1U.G0358600/AeUmb.PI554389.v2.6U.G0293300/AeUmb.PI554389.v2.2U.G0889400	12	0.923077
BP	GO:0072594	establishment of protein localization to organelle	13	0.629633	1.71481	0.0028084	0.012591	0.00689784	1637	tags=92%, list=34%, signal=61%	AeUmb.PI554389.v2.3U.G0661200/AeUmb.PI554389.v2.7U.G0794900/AeUmb.PI554389.v2.4U.G0264500/AeUmb.PI554389.v2.7U.G0235700/AeUmb.PI554389.v2.3U.G0078600/AeUmb.PI554389.v2.4U.G0939600/AeUmb.PI554389.v2.1U.G0283600/AeUmb.PI554389.v2.1U.G0299400/AeUmb.PI554389.v2.7U.G0205600/AeUmb.PI554389.v2.1U.G0358600/AeUmb.PI554389.v2.6U.G0293300/AeUmb.PI554389.v2.2U.G0889400	12	0.923077
MF	GO:0017111	ribonucleoside triphosphate phosphatase activity	94	0.392438	1.38113	0.00289971	0.0128929	0.00706323	1553	tags=52%, list=32%, signal=36%	AeUmb.PI554389.v2.7U.G0151600/AeUmb.PI554389.v2.6U.G0195800/AeUmb.PI554389.v2.5U.G0791500/AeUmb.PI554389.v2.6U.G0384700/AeUmb.PI554389.v2.3U.G0661200/AeUmb.PI554389.v2.7U.G0726500/AeUmb.PI554389.v2.7U.G0008200/AeUmb.PI554389.v2.2U.G0302800/AeUmb.PI554389.v2.7U.G0298800/AeUmb.PI554389.v2.2U.G0743100/AeUmb.PI554389.v2.1U.G0323500/AeUmb.PI554389.v2.6U.G0297400/AeUmb.PI554389.v2.7U.G0456900/AeUmb.PI5…	49	0.521277
MF	GO:0016462	pyrophosphatase activity	99	0.393528	1.39054	0.00305235	0.0134604	0.0073741	1790	tags=58%, list=37%, signal=37%	AeUmb.PI554389.v2.7U.G0151600/AeUmb.PI554389.v2.6U.G0195800/AeUmb.PI554389.v2.5U.G0791500/AeUmb.PI554389.v2.6U.G0384700/AeUmb.PI554389.v2.3U.G0661200/AeUmb.PI554389.v2.7U.G0726500/AeUmb.PI554389.v2.4U.G0926200/AeUmb.PI554389.v2.7U.G0008200/AeUmb.PI554389.v2.2U.G0302800/AeUmb.PI554389.v2.2U.G0785400/AeUmb.PI554389.v2.7U.G0298800/AeUmb.PI554389.v2.2U.G0743100/AeUmb.PI554389.v2.1U.G0323500/AeUmb.PI5…	57	0.575758
BP	GO:0051179	localization	245	0.342901	1.27421	0.00309969	0.013558	0.00742758	2412	tags=67%, list=50%, signal=35%	AeUmb.PI554389.v2.3U.G0195000/AeUmb.PI554389.v2.7U.G0273700/AeUmb.PI554389.v2.4U.G0983100/AeUmb.PI554389.v2.4U.G0145000/AeUmb.PI554389.v2.6U.G0123500/AeUmb.PI554389.v2.2U.G0131000/AeUmb.PI554389.v2.3U.G0018900/AeUmb.PI554389.v2.6U.G0195800/AeUmb.PI554389.v2.5U.G0335400/AeUmb.PI554389.v2.4U.G0710500/AeUmb.PI554389.v2.3U.G0661200/AeUmb.PI554389.v2.6U.G0604900/AeUmb.PI554389.v2.7U.G0794900/AeUmb.PI5…	165	0.673469
BP	GO:0006812	monoatomic cation transport	48	0.449422	1.49013	0.00330033	0.0143192	0.00784459	1880	tags=69%, list=39%, signal=42%	AeUmb.PI554389.v2.3U.G0195000/AeUmb.PI554389.v2.7U.G0273700/AeUmb.PI554389.v2.2U.G0131000/AeUmb.PI554389.v2.3U.G0018900/AeUmb.PI554389.v2.3U.G0224900/AeUmb.PI554389.v2.5U.G0671900/AeUmb.PI554389.v2.5U.G0836500/AeUmb.PI554389.v2.2U.G0158700/AeUmb.PI554389.v2.7U.G0319200/AeUmb.PI554389.v2.5U.G0222500/AeUmb.PI554389.v2.6U.G0149900/AeUmb.PI554389.v2.2U.G0681500/AeUmb.PI554389.v2.7U.G0070300/AeUmb.PI5…	33	0.6875
BP	GO:0051234	establishment of localization	243	0.340885	1.26613	0.00349965	0.0150625	0.00825181	2412	tags=67%, list=50%, signal=35%	AeUmb.PI554389.v2.3U.G0195000/AeUmb.PI554389.v2.7U.G0273700/AeUmb.PI554389.v2.4U.G0983100/AeUmb.PI554389.v2.4U.G0145000/AeUmb.PI554389.v2.6U.G0123500/AeUmb.PI554389.v2.2U.G0131000/AeUmb.PI554389.v2.3U.G0018900/AeUmb.PI554389.v2.6U.G0195800/AeUmb.PI554389.v2.5U.G0335400/AeUmb.PI554389.v2.4U.G0710500/AeUmb.PI554389.v2.3U.G0661200/AeUmb.PI554389.v2.6U.G0604900/AeUmb.PI554389.v2.7U.G0794900/AeUmb.PI5…	163	0.670782
CC	GO:0031967	organelle envelope	18	0.568878	1.64928	0.00377012	0.0156025	0.00854765	1332	tags=72%, list=28%, signal=52%	AeUmb.PI554389.v2.5U.G0335400/AeUmb.PI554389.v2.5U.G0791500/AeUmb.PI554389.v2.3U.G0182800/AeUmb.PI554389.v2.5U.G0237400/AeUmb.PI554389.v2.7U.G0143200/AeUmb.PI554389.v2.6U.G0423400/AeUmb.PI554389.v2.5U.G0216700/AeUmb.PI554389.v2.7U.G1004300/AeUmb.PI554389.v2.1U.G0299400/AeUmb.PI554389.v2.3U.G0283900/AeUmb.PI554389.v2.4U.G0932400/AeUmb.PI554389.v2.1U.G0423600/AeUmb.PI554389.v2.4U.G0970100	13	0.722222
CC	GO:0031975	envelope	18	0.568878	1.64928	0.00377012	0.0156025	0.00854765	1332	tags=72%, list=28%, signal=52%	AeUmb.PI554389.v2.5U.G0335400/AeUmb.PI554389.v2.5U.G0791500/AeUmb.PI554389.v2.3U.G0182800/AeUmb.PI554389.v2.5U.G0237400/AeUmb.PI554389.v2.7U.G0143200/AeUmb.PI554389.v2.6U.G0423400/AeUmb.PI554389.v2.5U.G0216700/AeUmb.PI554389.v2.7U.G1004300/AeUmb.PI554389.v2.1U.G0299400/AeUmb.PI554389.v2.3U.G0283900/AeUmb.PI554389.v2.4U.G0932400/AeUmb.PI554389.v2.1U.G0423600/AeUmb.PI554389.v2.4U.G0970100	13	0.722222
MF	GO:0019842	vitamin binding	20	0.553937	1.63634	0.00375025	0.0156025	0.00854765	1717	tags=75%, list=36%, signal=48%	AeUmb.PI554389.v2.1U.G0262700/AeUmb.PI554389.v2.2U.G0262200/AeUmb.PI554389.v2.6U.G0698300/AeUmb.PI554389.v2.6U.G0379800/AeUmb.PI554389.v2.1U.G0498100/AeUmb.PI554389.v2.3U.G0144800/AeUmb.PI554389.v2.7U.G1029500/AeUmb.PI554389.v2.3U.G0291000/AeUmb.PI554389.v2.1U.G0167700/AeUmb.PI554389.v2.4U.G0987400/AeUmb.PI554389.v2.7U.G0757900/AeUmb.PI554389.v2.6U.G0554800/AeUmb.PI554389.v2.1U.G0305200/AeUmb.PI5…	15	0.75
BP	GO:0006753	nucleoside phosphate metabolic process	34	0.483572	1.54374	0.00370333	0.0156025	0.00854765	2315	tags=88%, list=48%, signal=46%	AeUmb.PI554389.v2.7U.G0273700/AeUmb.PI554389.v2.5U.G0541400/AeUmb.PI554389.v2.4U.G0915500/AeUmb.PI554389.v2.1U.G0580800/AeUmb.PI554389.v2.6U.G0611800/AeUmb.PI554389.v2.3U.G0276000/AeUmb.PI554389.v2.6U.G0598500/AeUmb.PI554389.v2.6U.G0563300/AeUmb.PI554389.v2.5U.G0425400/AeUmb.PI554389.v2.3U.G0283900/AeUmb.PI554389.v2.1U.G0223100/AeUmb.PI554389.v2.4U.G0248600/AeUmb.PI554389.v2.2U.G0268000/AeUmb.PI5…	30	0.882353
BP	GO:0009117	nucleotide metabolic process	34	0.483572	1.54374	0.00370333	0.0156025	0.00854765	2315	tags=88%, list=48%, signal=46%	AeUmb.PI554389.v2.7U.G0273700/AeUmb.PI554389.v2.5U.G0541400/AeUmb.PI554389.v2.4U.G0915500/AeUmb.PI554389.v2.1U.G0580800/AeUmb.PI554389.v2.6U.G0611800/AeUmb.PI554389.v2.3U.G0276000/AeUmb.PI554389.v2.6U.G0598500/AeUmb.PI554389.v2.6U.G0563300/AeUmb.PI554389.v2.5U.G0425400/AeUmb.PI554389.v2.3U.G0283900/AeUmb.PI554389.v2.1U.G0223100/AeUmb.PI554389.v2.4U.G0248600/AeUmb.PI554389.v2.2U.G0268000/AeUmb.PI5…	30	0.882353
BP	GO:0009060	aerobic respiration	14	0.609515	1.68461	0.00392197	0.016107	0.00882405	1708	tags=93%, list=36%, signal=60%	AeUmb.PI554389.v2.6U.G0437300/AeUmb.PI554389.v2.5U.G0237400/AeUmb.PI554389.v2.5U.G0175000/AeUmb.PI554389.v2.6U.G0400600/AeUmb.PI554389.v2.6U.G0437400/AeUmb.PI554389.v2.6U.G0451400/AeUmb.PI554389.v2.7U.G0143200/AeUmb.PI554389.v2.4U.G0932400/AeUmb.PI554389.v2.4U.G0962500/AeUmb.PI554389.v2.1U.G0423600/AeUmb.PI554389.v2.2U.G0755300/AeUmb.PI554389.v2.3U.G0063200/AeUmb.PI554389.v2.2U.G0197800	13	0.928571
BP	GO:0016192	vesicle-mediated transport	32	0.487867	1.54448	0.0043056	0.0174166	0.00954149	1734	tags=72%, list=36%, signal=46%	AeUmb.PI554389.v2.4U.G0145000/AeUmb.PI554389.v2.7U.G0794900/AeUmb.PI554389.v2.3U.G0016100/AeUmb.PI554389.v2.4U.G0264500/AeUmb.PI554389.v2.7U.G0235700/AeUmb.PI554389.v2.3U.G0078600/AeUmb.PI554389.v2.4U.G0791100/AeUmb.PI554389.v2.2U.G0058700/AeUmb.PI554389.v2.6U.G0687000/AeUmb.PI554389.v2.1U.G0472700/AeUmb.PI554389.v2.2U.G0791300/AeUmb.PI554389.v2.3U.G0110600/AeUmb.PI554389.v2.6U.G0722500/AeUmb.PI5…	23	0.71875
BP	GO:0044248	cellular catabolic process	40	0.458112	1.48817	0.00430387	0.0174166	0.00954149	1931	tags=60%, list=40%, signal=36%	AeUmb.PI554389.v2.5U.G0030100/AeUmb.PI554389.v2.3U.G0596600/AeUmb.PI554389.v2.5U.G0511800/AeUmb.PI554389.v2.1U.G0580800/AeUmb.PI554389.v2.7U.G0698900/AeUmb.PI554389.v2.6U.G0324900/AeUmb.PI554389.v2.1U.G0287000/AeUmb.PI554389.v2.4U.G0660300/AeUmb.PI554389.v2.4U.G0827100/AeUmb.PI554389.v2.4U.G0248600/AeUmb.PI554389.v2.3U.G0321300/AeUmb.PI554389.v2.6U.G0498700/AeUmb.PI554389.v2.3U.G0382100/AeUmb.PI5…	24	0.6
MF	GO:0140098	catalytic activity, acting on RNA	43	0.456134	1.4944	0.00440132	0.0175401	0.00960912	1552	tags=56%, list=32%, signal=38%	AeUmb.PI554389.v2.4U.G0926200/AeUmb.PI554389.v2.5U.G0392800/AeUmb.PI554389.v2.2U.G0785400/AeUmb.PI554389.v2.6U.G0694800/AeUmb.PI554389.v2.5U.G0256700/AeUmb.PI554389.v2.4U.G0836200/AeUmb.PI554389.v2.7U.G0181700/AeUmb.PI554389.v2.2U.G0394700/AeUmb.PI554389.v2.2U.G0152200/AeUmb.PI554389.v2.5U.G0190400/AeUmb.PI554389.v2.1U.G0425300/AeUmb.PI554389.v2.6U.G0175200/AeUmb.PI554389.v2.1U.G0226600/AeUmb.PI5…	24	0.55814
BP	GO:0071705	nitrogen compound transport	47	0.447042	1.47866	0.00440044	0.0175401	0.00960912	1764	tags=68%, list=37%, signal=43%	AeUmb.PI554389.v2.4U.G0983100/AeUmb.PI554389.v2.6U.G0195800/AeUmb.PI554389.v2.7U.G0794900/AeUmb.PI554389.v2.3U.G0016100/AeUmb.PI554389.v2.4U.G0264500/AeUmb.PI554389.v2.1U.G0450000/AeUmb.PI554389.v2.7U.G0235700/AeUmb.PI554389.v2.3U.G0078600/AeUmb.PI554389.v2.6U.G0443700/AeUmb.PI554389.v2.2U.G0058700/AeUmb.PI554389.v2.1U.G0472700/AeUmb.PI554389.v2.5U.G0318500/AeUmb.PI554389.v2.7U.G1004300/AeUmb.PI5…	32	0.680851
BP	GO:0034660	ncRNA metabolic process	33	0.483322	1.53689	0.0045045	0.0178193	0.00976208	1935	tags=73%, list=40%, signal=44%	AeUmb.PI554389.v2.4U.G1029100/AeUmb.PI554389.v2.5U.G0256700/AeUmb.PI554389.v2.7U.G0181700/AeUmb.PI554389.v2.2U.G0152200/AeUmb.PI554389.v2.5U.G0190400/AeUmb.PI554389.v2.7U.G0602200/AeUmb.PI554389.v2.1U.G0226600/AeUmb.PI554389.v2.5U.G0397100/AeUmb.PI554389.v2.5U.G0961300/AeUmb.PI554389.v2.3U.G0260300/AeUmb.PI554389.v2.7U.G0282800/AeUmb.PI554389.v2.6U.G0726700/AeUmb.PI554389.v2.7U.G0006400/AeUmb.PI5…	24	0.727273
MF	GO:0004722	protein serine/threonine phosphatase activity	16	0.577465	1.63867	0.0047136	0.0185103	0.0101407	1608	tags=88%, list=34%, signal=58%	AeUmb.PI554389.v2.4U.G0742900/AeUmb.PI554389.v2.6U.G0104600/AeUmb.PI554389.v2.6U.G0161400/AeUmb.PI554389.v2.4U.G0031000/AeUmb.PI554389.v2.1U.G0176400/AeUmb.PI554389.v2.5U.G0323200/AeUmb.PI554389.v2.2U.G0225500/AeUmb.PI554389.v2.2U.G0728800/AeUmb.PI554389.v2.5U.G0782700/AeUmb.PI554389.v2.5U.G0315400/AeUmb.PI554389.v2.3U.G0161500/AeUmb.PI554389.v2.5U.G0617800/AeUmb.PI554389.v2.6U.G0443000/AeUmb.PI5…	14	0.875
BP	GO:0006091	generation of precursor metabolites and energy	35	0.476325	1.52491	0.00480384	0.018728	0.0102599	2154	tags=83%, list=45%, signal=46%	AeUmb.PI554389.v2.6U.G0437300/AeUmb.PI554389.v2.6U.G0309500/AeUmb.PI554389.v2.2U.G0096000/AeUmb.PI554389.v2.1U.G0580800/AeUmb.PI554389.v2.7U.G0145200/AeUmb.PI554389.v2.5U.G0237400/AeUmb.PI554389.v2.4U.G0076800/AeUmb.PI554389.v2.5U.G0175000/AeUmb.PI554389.v2.6U.G0400600/AeUmb.PI554389.v2.6U.G0437400/AeUmb.PI554389.v2.6U.G0451400/AeUmb.PI554389.v2.7U.G0143200/AeUmb.PI554389.v2.4U.G0248600/AeUmb.PI5…	29	0.828571
BP	GO:0072521	purine-containing compound metabolic process	30	0.490719	1.5405	0.00491031	0.0190054	0.0104119	2134	tags=83%, list=45%, signal=46%	AeUmb.PI554389.v2.7U.G0273700/AeUmb.PI554389.v2.5U.G0541400/AeUmb.PI554389.v2.4U.G0915500/AeUmb.PI554389.v2.1U.G0580800/AeUmb.PI554389.v2.6U.G0611800/AeUmb.PI554389.v2.6U.G0598500/AeUmb.PI554389.v2.5U.G0425400/AeUmb.PI554389.v2.3U.G0283900/AeUmb.PI554389.v2.1U.G0223100/AeUmb.PI554389.v2.4U.G0248600/AeUmb.PI554389.v2.2U.G0268000/AeUmb.PI554389.v2.2U.G0892100/AeUmb.PI554389.v2.7U.G0414800/AeUmb.PI5…	25	0.833333
MF	GO:0016772	transferase activity, transferring phosphorus-containing groups	276	0.33278	1.2429	0.00519948	0.0199809	0.0109463	2190	tags=59%, list=46%, signal=34%	AeUmb.PI554389.v2.5U.G0424000/AeUmb.PI554389.v2.5U.G0541400/AeUmb.PI554389.v2.1U.G0174900/AeUmb.PI554389.v2.3U.G0246500/AeUmb.PI554389.v2.1U.G0254000/AeUmb.PI554389.v2.7U.G0061600/AeUmb.PI554389.v2.3U.G0047200/AeUmb.PI554389.v2.2U.G0460800/AeUmb.PI554389.v2.3U.G0289100/AeUmb.PI554389.v2.5U.G0894200/AeUmb.PI554389.v2.2U.G0158000/AeUmb.PI554389.v2.5U.G0237300/AeUmb.PI554389.v2.6U.G0501600/AeUmb.PI5…	162	0.586957
BP	GO:0006810	transport	241	0.33858	1.25709	0.00569943	0.0217468	0.0119137	2412	tags=67%, list=50%, signal=35%	AeUmb.PI554389.v2.3U.G0195000/AeUmb.PI554389.v2.7U.G0273700/AeUmb.PI554389.v2.4U.G0983100/AeUmb.PI554389.v2.4U.G0145000/AeUmb.PI554389.v2.6U.G0123500/AeUmb.PI554389.v2.2U.G0131000/AeUmb.PI554389.v2.3U.G0018900/AeUmb.PI554389.v2.6U.G0195800/AeUmb.PI554389.v2.5U.G0335400/AeUmb.PI554389.v2.4U.G0710500/AeUmb.PI554389.v2.6U.G0604900/AeUmb.PI554389.v2.7U.G0794900/AeUmb.PI554389.v2.5U.G0613200/AeUmb.PI5…	161	0.66805
BP	GO:0035556	intracellular signal transduction	20	0.540671	1.59715	0.00587878	0.0222731	0.0122021	1751	tags=80%, list=37%, signal=51%	AeUmb.PI554389.v2.5U.G0237000/AeUmb.PI554389.v2.5U.G0791500/AeUmb.PI554389.v2.6U.G0283900/AeUmb.PI554389.v2.5U.G0121100/AeUmb.PI554389.v2.1U.G0450000/AeUmb.PI554389.v2.1U.G0307900/AeUmb.PI554389.v2.3U.G0416800/AeUmb.PI554389.v2.4U.G0246200/AeUmb.PI554389.v2.4U.G0846300/AeUmb.PI554389.v2.5U.G0539700/AeUmb.PI554389.v2.7U.G0578100/AeUmb.PI554389.v2.7U.G0498700/AeUmb.PI554389.v2.3U.G0078900/AeUmb.PI5…	16	0.8
BP	GO:0007034	vacuolar transport	11	0.638574	1.67891	0.00622494	0.0229385	0.0125666	1735	tags=100%, list=36%, signal=64%	AeUmb.PI554389.v2.7U.G0794900/AeUmb.PI554389.v2.5U.G0310600/AeUmb.PI554389.v2.4U.G0264500/AeUmb.PI554389.v2.7U.G0235700/AeUmb.PI554389.v2.3U.G0078600/AeUmb.PI554389.v2.7U.G0049700/AeUmb.PI554389.v2.7U.G0205600/AeUmb.PI554389.v2.6U.G0450600/AeUmb.PI554389.v2.1U.G0358600/AeUmb.PI554389.v2.2U.G0889400/AeUmb.PI554389.v2.4U.G0427500	11	1
BP	GO:0044272	sulfur compound biosynthetic process	14	0.592926	1.63876	0.00619259	0.0229385	0.0125666	1811	tags=93%, list=38%, signal=58%	AeUmb.PI554389.v2.6U.G0513200/AeUmb.PI554389.v2.6U.G0170300/AeUmb.PI554389.v2.6U.G0611800/AeUmb.PI554389.v2.1U.G0167500/AeUmb.PI554389.v2.5U.G0056600/AeUmb.PI554389.v2.6U.G0379800/AeUmb.PI554389.v2.2U.G0892100/AeUmb.PI554389.v2.7U.G0296100/AeUmb.PI554389.v2.5U.G0051200/AeUmb.PI554389.v2.5U.G0362500/AeUmb.PI554389.v2.6U.G0355500/AeUmb.PI554389.v2.6U.G0220400/AeUmb.PI554389.v2.3U.G0301800	13	0.928571
BP	GO:0006163	purine nucleotide metabolic process	29	0.488631	1.52586	0.0061159	0.0229385	0.0125666	2134	tags=83%, list=45%, signal=46%	AeUmb.PI554389.v2.7U.G0273700/AeUmb.PI554389.v2.5U.G0541400/AeUmb.PI554389.v2.4U.G0915500/AeUmb.PI554389.v2.1U.G0580800/AeUmb.PI554389.v2.6U.G0611800/AeUmb.PI554389.v2.6U.G0598500/AeUmb.PI554389.v2.5U.G0425400/AeUmb.PI554389.v2.3U.G0283900/AeUmb.PI554389.v2.1U.G0223100/AeUmb.PI554389.v2.4U.G0248600/AeUmb.PI554389.v2.2U.G0268000/AeUmb.PI554389.v2.2U.G0892100/AeUmb.PI554389.v2.7U.G0414800/AeUmb.PI5…	24	0.827586
MF	GO:0015399	primary active transmembrane transporter activity	32	0.478106	1.51358	0.00620807	0.0229385	0.0125666	1553	tags=62%, list=32%, signal=42%	AeUmb.PI554389.v2.2U.G0169000/AeUmb.PI554389.v2.3U.G0195000/AeUmb.PI554389.v2.7U.G0273700/AeUmb.PI554389.v2.2U.G0131000/AeUmb.PI554389.v2.6U.G0460100/AeUmb.PI554389.v2.3U.G0224900/AeUmb.PI554389.v2.6U.G0149900/AeUmb.PI554389.v2.1U.G0251200/AeUmb.PI554389.v2.7U.G0070300/AeUmb.PI554389.v2.4U.G0432400/AeUmb.PI554389.v2.5U.G0147600/AeUmb.PI554389.v2.1U.G0124800/AeUmb.PI554389.v2.6U.G0177400/AeUmb.PI5…	20	0.625
BP	GO:1901565	organonitrogen compound catabolic process	51	0.432151	1.44228	0.0064	0.0234231	0.0128321	1654	tags=61%, list=35%, signal=40%	AeUmb.PI554389.v2.5U.G0030100/AeUmb.PI554389.v2.4U.G0914600/AeUmb.PI554389.v2.7U.G0794900/AeUmb.PI554389.v2.1U.G0260700/AeUmb.PI554389.v2.1U.G0580800/AeUmb.PI554389.v2.1U.G0476800/AeUmb.PI554389.v2.2U.G0100400/AeUmb.PI554389.v2.7U.G0235700/AeUmb.PI554389.v2.3U.G0078600/AeUmb.PI554389.v2.6U.G0505800/AeUmb.PI554389.v2.1U.G0287000/AeUmb.PI554389.v2.7U.G0640800/AeUmb.PI554389.v2.7U.G0239400/AeUmb.PI5…	31	0.607843
MF	GO:0008237	metallopeptidase activity	21	0.531447	1.58179	0.00678138	0.0246512	0.0135049	2006	tags=81%, list=42%, signal=47%	AeUmb.PI554389.v2.6U.G0589100/AeUmb.PI554389.v2.7U.G0456900/AeUmb.PI554389.v2.3U.G0175100/AeUmb.PI554389.v2.3U.G0158900/AeUmb.PI554389.v2.5U.G0363000/AeUmb.PI554389.v2.4U.G0153600/AeUmb.PI554389.v2.6U.G0626600/AeUmb.PI554389.v2.3U.G0260300/AeUmb.PI554389.v2.7U.G0217400/AeUmb.PI554389.v2.3U.G0265700/AeUmb.PI554389.v2.7U.G0257600/AeUmb.PI554389.v2.6U.G0422100/AeUmb.PI554389.v2.3U.G0375700/AeUmb.PI5…	17	0.809524
MF	GO:0003755	peptidyl-prolyl cis-trans isomerase activity	12	0.608679	1.63161	0.00721757	0.0257156	0.014088	1269	tags=75%, list=27%, signal=55%	AeUmb.PI554389.v2.7U.G0161000/AeUmb.PI554389.v2.6U.G0383600/AeUmb.PI554389.v2.2U.G0118600/AeUmb.PI554389.v2.3U.G0179800/AeUmb.PI554389.v2.6U.G0196300/AeUmb.PI554389.v2.2U.G0177100/AeUmb.PI554389.v2.2U.G0893800/AeUmb.PI554389.v2.5U.G0397100/AeUmb.PI554389.v2.2U.G0812400	9	0.75
MF	GO:0016859	cis-trans isomerase activity	12	0.608679	1.63161	0.00721757	0.0257156	0.014088	1269	tags=75%, list=27%, signal=55%	AeUmb.PI554389.v2.7U.G0161000/AeUmb.PI554389.v2.6U.G0383600/AeUmb.PI554389.v2.2U.G0118600/AeUmb.PI554389.v2.3U.G0179800/AeUmb.PI554389.v2.6U.G0196300/AeUmb.PI554389.v2.2U.G0177100/AeUmb.PI554389.v2.2U.G0893800/AeUmb.PI554389.v2.5U.G0397100/AeUmb.PI554389.v2.2U.G0812400	9	0.75
CC	GO:0140535	intracellular protein-containing complex	33	0.473408	1.50537	0.00720721	0.0257156	0.014088	1803	tags=70%, list=38%, signal=44%	AeUmb.PI554389.v2.4U.G0914600/AeUmb.PI554389.v2.5U.G0392800/AeUmb.PI554389.v2.6U.G0694800/AeUmb.PI554389.v2.1U.G0557300/AeUmb.PI554389.v2.2U.G0100400/AeUmb.PI554389.v2.3U.G0040800/AeUmb.PI554389.v2.7U.G0640800/AeUmb.PI554389.v2.4U.G0160900/AeUmb.PI554389.v2.7U.G1052500/AeUmb.PI554389.v2.5U.G0217500/AeUmb.PI554389.v2.4U.G1007500/AeUmb.PI554389.v2.5U.G0363000/AeUmb.PI554389.v2.1U.G0389000/AeUmb.PI5…	23	0.69697
CC	GO:0005634	nucleus	82	0.389546	1.35612	0.00729927	0.0258356	0.0141537	2439	tags=80%, list=51%, signal=40%	AeUmb.PI554389.v2.7U.G0066800/AeUmb.PI554389.v2.1U.G0269200/AeUmb.PI554389.v2.4U.G0011900/AeUmb.PI554389.v2.4U.G0961100/AeUmb.PI554389.v2.6U.G0556200/AeUmb.PI554389.v2.4U.G0131200/AeUmb.PI554389.v2.1U.G0238400/AeUmb.PI554389.v2.2U.G0396000/AeUmb.PI554389.v2.1U.G0557300/AeUmb.PI554389.v2.3U.G0464000/AeUmb.PI554389.v2.6U.G0181400/AeUmb.PI554389.v2.3U.G0040800/AeUmb.PI554389.v2.6U.G0457200/AeUmb.PI5…	66	0.804878
BP	GO:0043043	peptide biosynthetic process	34	0.468659	1.49613	0.00740667	0.0260444	0.0142681	1491	tags=59%, list=31%, signal=41%	AeUmb.PI554389.v2.5U.G0256700/AeUmb.PI554389.v2.2U.G0136400/AeUmb.PI554389.v2.5U.G0706300/AeUmb.PI554389.v2.6U.G0246900/AeUmb.PI554389.v2.7U.G0181700/AeUmb.PI554389.v2.3U.G0087400/AeUmb.PI554389.v2.7U.G0531700/AeUmb.PI554389.v2.4U.G0833100/AeUmb.PI554389.v2.1U.G0167500/AeUmb.PI554389.v2.3U.G0101900/AeUmb.PI554389.v2.7U.G0081800/AeUmb.PI554389.v2.5U.G0190400/AeUmb.PI554389.v2.7U.G0874300/AeUmb.PI5…	20	0.588235
MF	GO:0046873	metal ion transmembrane transporter activity	29	0.484091	1.51168	0.00782033	0.0273204	0.0149671	1812	tags=69%, list=38%, signal=43%	AeUmb.PI554389.v2.3U.G0018900/AeUmb.PI554389.v2.5U.G0671900/AeUmb.PI554389.v2.5U.G0836500/AeUmb.PI554389.v2.2U.G0158700/AeUmb.PI554389.v2.7U.G0319200/AeUmb.PI554389.v2.2U.G0681500/AeUmb.PI554389.v2.2U.G0214600/AeUmb.PI554389.v2.5U.G0316300/AeUmb.PI554389.v2.5U.G0147600/AeUmb.PI554389.v2.7U.G1028000/AeUmb.PI554389.v2.2U.G0475900/AeUmb.PI554389.v2.2U.G0672700/AeUmb.PI554389.v2.2U.G0457500/AeUmb.PI5…	20	0.689655
MF	GO:0016810	hydrolase activity, acting on carbon-nitrogen (but not peptide) bonds	21	0.525674	1.56461	0.00819838	0.0284563	0.0155895	2125	tags=90%, list=44%, signal=50%	AeUmb.PI554389.v2.6U.G0404400/AeUmb.PI554389.v2.5U.G0030100/AeUmb.PI554389.v2.7U.G0273300/AeUmb.PI554389.v2.2U.G0555700/AeUmb.PI554389.v2.3U.G0253900/AeUmb.PI554389.v2.7U.G0266300/AeUmb.PI554389.v2.4U.G0827100/AeUmb.PI554389.v2.5U.G0056200/AeUmb.PI554389.v2.5U.G0178600/AeUmb.PI554389.v2.3U.G0362200/AeUmb.PI554389.v2.3U.G0362100/AeUmb.PI554389.v2.2U.G0182500/AeUmb.PI554389.v2.3U.G0336300/AeUmb.PI5…	19	0.904762
BP	GO:0030001	metal ion transport	27	0.488707	1.51279	0.00842866	0.0288829	0.0158232	1812	tags=70%, list=38%, signal=44%	AeUmb.PI554389.v2.3U.G0018900/AeUmb.PI554389.v2.5U.G0671900/AeUmb.PI554389.v2.5U.G0836500/AeUmb.PI554389.v2.2U.G0158700/AeUmb.PI554389.v2.7U.G0319200/AeUmb.PI554389.v2.2U.G0681500/AeUmb.PI554389.v2.2U.G0214600/AeUmb.PI554389.v2.5U.G0316300/AeUmb.PI554389.v2.5U.G0147600/AeUmb.PI554389.v2.2U.G0475900/AeUmb.PI554389.v2.2U.G0672700/AeUmb.PI554389.v2.2U.G0457500/AeUmb.PI554389.v2.6U.G0421700/AeUmb.PI5…	19	0.703704
BP	GO:0006811	monoatomic ion transport	61	0.410355	1.39252	0.00839916	0.0288829	0.0158232	1946	tags=66%, list=41%, signal=39%	AeUmb.PI554389.v2.3U.G0195000/AeUmb.PI554389.v2.7U.G0273700/AeUmb.PI554389.v2.2U.G0131000/AeUmb.PI554389.v2.3U.G0018900/AeUmb.PI554389.v2.5U.G0335400/AeUmb.PI554389.v2.4U.G0710500/AeUmb.PI554389.v2.3U.G0182800/AeUmb.PI554389.v2.3U.G0224900/AeUmb.PI554389.v2.5U.G0671900/AeUmb.PI554389.v2.5U.G0836500/AeUmb.PI554389.v2.2U.G0158700/AeUmb.PI554389.v2.7U.G0319200/AeUmb.PI554389.v2.5U.G0222500/AeUmb.PI5…	40	0.655738
BP	GO:0031323	regulation of cellular metabolic process	183	0.342933	1.25723	0.00849915	0.0289401	0.0158545	2596	tags=70%, list=54%, signal=33%	AeUmb.PI554389.v2.7U.G0066800/AeUmb.PI554389.v2.2U.G0319500/AeUmb.PI554389.v2.4U.G0611700/AeUmb.PI554389.v2.1U.G0140800/AeUmb.PI554389.v2.2U.G0140100/AeUmb.PI554389.v2.5U.G0670500/AeUmb.PI554389.v2.7U.G0698900/AeUmb.PI554389.v2.4U.G0897300/AeUmb.PI554389.v2.5U.G0262900/AeUmb.PI554389.v2.4U.G0936800/AeUmb.PI554389.v2.5U.G0528800/AeUmb.PI554389.v2.7U.G0236500/AeUmb.PI554389.v2.3U.G0154000/AeUmb.PI5…	129	0.704918
BP	GO:0070887	cellular response to chemical stimulus	19	0.539774	1.57955	0.00883787	0.0299042	0.0163827	1242	tags=68%, list=26%, signal=51%	AeUmb.PI554389.v2.3U.G0596600/AeUmb.PI554389.v2.6U.G0810800/AeUmb.PI554389.v2.6U.G0283900/AeUmb.PI554389.v2.7U.G0088700/AeUmb.PI554389.v2.7U.G0932000/AeUmb.PI554389.v2.2U.G0464100/AeUmb.PI554389.v2.3U.G0416800/AeUmb.PI554389.v2.6U.G0581300/AeUmb.PI554389.v2.4U.G0246200/AeUmb.PI554389.v2.1U.G0156800/AeUmb.PI554389.v2.3U.G0125500/AeUmb.PI554389.v2.5U.G0539700/AeUmb.PI554389.v2.7U.G0578100	13	0.684211
CC	GO:0140513	nuclear protein-containing complex	34	0.462187	1.47547	0.00960865	0.0323091	0.0177001	2587	tags=100%, list=54%, signal=46%	AeUmb.PI554389.v2.4U.G0131200/AeUmb.PI554389.v2.1U.G0557300/AeUmb.PI554389.v2.3U.G0464000/AeUmb.PI554389.v2.3U.G0040800/AeUmb.PI554389.v2.6U.G0457200/AeUmb.PI554389.v2.1U.G0307900/AeUmb.PI554389.v2.7U.G1052500/AeUmb.PI554389.v2.5U.G0363000/AeUmb.PI554389.v2.4U.G0153600/AeUmb.PI554389.v2.7U.G0310400/AeUmb.PI554389.v2.2U.G0560000/AeUmb.PI554389.v2.6U.G0398400/AeUmb.PI554389.v2.5U.G0898200/AeUmb.PI5…	34	1
BP	GO:0019222	regulation of metabolic process	185	0.340364	1.24861	0.00969903	0.0324104	0.0177557	2596	tags=70%, list=54%, signal=33%	AeUmb.PI554389.v2.7U.G0066800/AeUmb.PI554389.v2.2U.G0319500/AeUmb.PI554389.v2.4U.G0611700/AeUmb.PI554389.v2.1U.G0140800/AeUmb.PI554389.v2.2U.G0140100/AeUmb.PI554389.v2.1U.G0260700/AeUmb.PI554389.v2.5U.G0670500/AeUmb.PI554389.v2.7U.G0698900/AeUmb.PI554389.v2.4U.G0897300/AeUmb.PI554389.v2.5U.G0262900/AeUmb.PI554389.v2.4U.G0936800/AeUmb.PI554389.v2.5U.G0528800/AeUmb.PI554389.v2.7U.G0236500/AeUmb.PI5…	130	0.702703
CC	GO:0061695	transferase complex, transferring phosphorus-containing groups	12	0.59846	1.60421	0.0104603	0.0343709	0.0188297	1680	tags=92%, list=35%, signal=60%	AeUmb.PI554389.v2.1U.G0557300/AeUmb.PI554389.v2.3U.G0040800/AeUmb.PI554389.v2.7U.G1052500/AeUmb.PI554389.v2.5U.G0363000/AeUmb.PI554389.v2.6U.G0498700/AeUmb.PI554389.v2.1U.G0389000/AeUmb.PI554389.v2.2U.G0182400/AeUmb.PI554389.v2.4U.G0438400/AeUmb.PI554389.v2.1U.G0014200/AeUmb.PI554389.v2.2U.G0387300/AeUmb.PI554389.v2.3U.G0336100	11	0.916667
BP	GO:1901607	alpha-amino acid biosynthetic process	13	0.586497	1.59733	0.0104015	0.0343709	0.0188297	1698	tags=77%, list=36%, signal=50%	AeUmb.PI554389.v2.6U.G0170300/AeUmb.PI554389.v2.2U.G0567700/AeUmb.PI554389.v2.5U.G0056600/AeUmb.PI554389.v2.6U.G0243600/AeUmb.PI554389.v2.6U.G0286000/AeUmb.PI554389.v2.2U.G0657100/AeUmb.PI554389.v2.5U.G0252200/AeUmb.PI554389.v2.5U.G0051200/AeUmb.PI554389.v2.6U.G0224800/AeUmb.PI554389.v2.6U.G0220400	10	0.769231
MF	GO:0000287	magnesium ion binding	20	0.525888	1.55348	0.0105413	0.0343709	0.0188297	1188	tags=55%, list=25%, signal=42%	AeUmb.PI554389.v2.6U.G0437300/AeUmb.PI554389.v2.3U.G0276000/AeUmb.PI554389.v2.3U.G0222600/AeUmb.PI554389.v2.6U.G0563300/AeUmb.PI554389.v2.6U.G0379800/AeUmb.PI554389.v2.5U.G0006800/AeUmb.PI554389.v2.4U.G0248600/AeUmb.PI554389.v2.3U.G0099900/AeUmb.PI554389.v2.7U.G0274900/AeUmb.PI554389.v2.3U.G0145000/AeUmb.PI554389.v2.6U.G0263200	11	0.55
MF	GO:0005524	ATP binding	366	0.315709	1.19148	0.010499	0.0343709	0.0188297	2198	tags=55%, list=46%, signal=32%	AeUmb.PI554389.v2.7U.G0273700/AeUmb.PI554389.v2.7U.G0151600/AeUmb.PI554389.v2.5U.G0424000/AeUmb.PI554389.v2.5U.G0541400/AeUmb.PI554389.v2.1U.G0174900/AeUmb.PI554389.v2.3U.G0246500/AeUmb.PI554389.v2.1U.G0254000/AeUmb.PI554389.v2.3U.G0047200/AeUmb.PI554389.v2.2U.G0460800/AeUmb.PI554389.v2.5U.G0894200/AeUmb.PI554389.v2.2U.G0158000/AeUmb.PI554389.v2.5U.G0237300/AeUmb.PI554389.v2.6U.G0501600/AeUmb.PI5…	203	0.554645
BP	GO:0043603	amide metabolic process	57	0.410996	1.38496	0.0107	0.0346783	0.0189981	1342	tags=49%, list=28%, signal=36%	AeUmb.PI554389.v2.5U.G0030100/AeUmb.PI554389.v2.6U.G0611800/AeUmb.PI554389.v2.5U.G0256700/AeUmb.PI554389.v2.2U.G0136400/AeUmb.PI554389.v2.5U.G0706300/AeUmb.PI554389.v2.1U.G0287000/AeUmb.PI554389.v2.6U.G0246900/AeUmb.PI554389.v2.7U.G0181700/AeUmb.PI554389.v2.3U.G0087400/AeUmb.PI554389.v2.7U.G0531700/AeUmb.PI554389.v2.4U.G0833100/AeUmb.PI554389.v2.1U.G0167500/AeUmb.PI554389.v2.3U.G0101900/AeUmb.PI5…	28	0.491228
MF	GO:0016853	isomerase activity	30	0.470724	1.47773	0.0108227	0.034866	0.0191009	1269	tags=60%, list=27%, signal=44%	AeUmb.PI554389.v2.7U.G0161000/AeUmb.PI554389.v2.5U.G0191200/AeUmb.PI554389.v2.4U.G1029100/AeUmb.PI554389.v2.1U.G0436800/AeUmb.PI554389.v2.4U.G0079100/AeUmb.PI554389.v2.6U.G0383600/AeUmb.PI554389.v2.3U.G0344500/AeUmb.PI554389.v2.2U.G0118600/AeUmb.PI554389.v2.5U.G0745200/AeUmb.PI554389.v2.3U.G0179800/AeUmb.PI554389.v2.6U.G0196300/AeUmb.PI554389.v2.2U.G0177100/AeUmb.PI554389.v2.6U.G0184600/AeUmb.PI5…	18	0.6
BP	GO:1901135	carbohydrate derivative metabolic process	55	0.415098	1.39498	0.0114	0.0365071	0.02	2438	tags=78%, list=51%, signal=39%	AeUmb.PI554389.v2.7U.G0273700/AeUmb.PI554389.v2.5U.G0541400/AeUmb.PI554389.v2.5U.G0883100/AeUmb.PI554389.v2.2U.G0230500/AeUmb.PI554389.v2.1U.G0580800/AeUmb.PI554389.v2.6U.G0611800/AeUmb.PI554389.v2.1U.G0287000/AeUmb.PI554389.v2.6U.G0598500/AeUmb.PI554389.v2.5U.G0230400/AeUmb.PI554389.v2.2U.G0662100/AeUmb.PI554389.v2.2U.G0246200/AeUmb.PI554389.v2.3U.G0283900/AeUmb.PI554389.v2.1U.G0223100/AeUmb.PI5…	43	0.781818
BP	GO:1901605	alpha-amino acid metabolic process	18	0.537101	1.55715	0.0118198	0.0376277	0.0206139	1411	tags=67%, list=30%, signal=47%	AeUmb.PI554389.v2.6U.G0170300/AeUmb.PI554389.v2.2U.G0567700/AeUmb.PI554389.v2.5U.G0056600/AeUmb.PI554389.v2.6U.G0243600/AeUmb.PI554389.v2.6U.G0286000/AeUmb.PI554389.v2.2U.G0657100/AeUmb.PI554389.v2.5U.G0252200/AeUmb.PI554389.v2.7U.G1029500/AeUmb.PI554389.v2.6U.G0551000/AeUmb.PI554389.v2.1U.G0167700/AeUmb.PI554389.v2.5U.G0051200/AeUmb.PI554389.v2.6U.G0224800	12	0.666667
BP	GO:0006351	DNA-templated transcription	181	0.338671	1.24102	0.0126987	0.0399527	0.0218876	2596	tags=70%, list=54%, signal=33%	AeUmb.PI554389.v2.2U.G0319500/AeUmb.PI554389.v2.3U.G0693800/AeUmb.PI554389.v2.4U.G0611700/AeUmb.PI554389.v2.1U.G0140800/AeUmb.PI554389.v2.2U.G0140100/AeUmb.PI554389.v2.5U.G0670500/AeUmb.PI554389.v2.4U.G0897300/AeUmb.PI554389.v2.5U.G0262900/AeUmb.PI554389.v2.4U.G0936800/AeUmb.PI554389.v2.5U.G0528800/AeUmb.PI554389.v2.7U.G0236500/AeUmb.PI554389.v2.3U.G0154000/AeUmb.PI554389.v2.1U.G0557300/AeUmb.PI5…	126	0.696133
BP	GO:0032774	RNA biosynthetic process	181	0.338671	1.24102	0.0126987	0.0399527	0.0218876	2596	tags=70%, list=54%, signal=33%	AeUmb.PI554389.v2.2U.G0319500/AeUmb.PI554389.v2.3U.G0693800/AeUmb.PI554389.v2.4U.G0611700/AeUmb.PI554389.v2.1U.G0140800/AeUmb.PI554389.v2.2U.G0140100/AeUmb.PI554389.v2.5U.G0670500/AeUmb.PI554389.v2.4U.G0897300/AeUmb.PI554389.v2.5U.G0262900/AeUmb.PI554389.v2.4U.G0936800/AeUmb.PI554389.v2.5U.G0528800/AeUmb.PI554389.v2.7U.G0236500/AeUmb.PI554389.v2.3U.G0154000/AeUmb.PI554389.v2.1U.G0557300/AeUmb.PI5…	126	0.696133
BP	GO:0006412	translation	33	0.459219	1.46025	0.0129129	0.0403904	0.0221274	1491	tags=58%, list=31%, signal=40%	AeUmb.PI554389.v2.5U.G0256700/AeUmb.PI554389.v2.2U.G0136400/AeUmb.PI554389.v2.5U.G0706300/AeUmb.PI554389.v2.6U.G0246900/AeUmb.PI554389.v2.7U.G0181700/AeUmb.PI554389.v2.3U.G0087400/AeUmb.PI554389.v2.7U.G0531700/AeUmb.PI554389.v2.4U.G0833100/AeUmb.PI554389.v2.3U.G0101900/AeUmb.PI554389.v2.7U.G0081800/AeUmb.PI554389.v2.5U.G0190400/AeUmb.PI554389.v2.7U.G0874300/AeUmb.PI554389.v2.1U.G0226600/AeUmb.PI5…	19	0.575758
MF	GO:0030674	protein-macromolecule adaptor activity	19	0.526706	1.54131	0.0139171	0.0429646	0.0235376	1891	tags=79%, list=40%, signal=48%	AeUmb.PI554389.v2.5U.G0501500/AeUmb.PI554389.v2.5U.G0670500/AeUmb.PI554389.v2.3U.G0016100/AeUmb.PI554389.v2.4U.G0791100/AeUmb.PI554389.v2.7U.G0159100/AeUmb.PI554389.v2.7U.G0341800/AeUmb.PI554389.v2.3U.G0110600/AeUmb.PI554389.v2.4U.G0390700/AeUmb.PI554389.v2.2U.G0560000/AeUmb.PI554389.v2.6U.G0398400/AeUmb.PI554389.v2.5U.G0898200/AeUmb.PI554389.v2.5U.G0365300/AeUmb.PI554389.v2.1U.G0305500/AeUmb.PI5…	15	0.789474
MF	GO:0060090	molecular adaptor activity	19	0.526706	1.54131	0.0139171	0.0429646	0.0235376	1891	tags=79%, list=40%, signal=48%	AeUmb.PI554389.v2.5U.G0501500/AeUmb.PI554389.v2.5U.G0670500/AeUmb.PI554389.v2.3U.G0016100/AeUmb.PI554389.v2.4U.G0791100/AeUmb.PI554389.v2.7U.G0159100/AeUmb.PI554389.v2.7U.G0341800/AeUmb.PI554389.v2.3U.G0110600/AeUmb.PI554389.v2.4U.G0390700/AeUmb.PI554389.v2.2U.G0560000/AeUmb.PI554389.v2.6U.G0398400/AeUmb.PI554389.v2.5U.G0898200/AeUmb.PI554389.v2.5U.G0365300/AeUmb.PI554389.v2.1U.G0305500/AeUmb.PI5…	15	0.789474
BP	GO:0046486	glycerolipid metabolic process	25	0.488658	1.4942	0.0139755	0.0429646	0.0235376	2191	tags=80%, list=46%, signal=44%	AeUmb.PI554389.v2.4U.G1018800/AeUmb.PI554389.v2.5U.G0883100/AeUmb.PI554389.v2.5U.G0121100/AeUmb.PI554389.v2.3U.G0029700/AeUmb.PI554389.v2.6U.G0448900/AeUmb.PI554389.v2.2U.G0657300/AeUmb.PI554389.v2.7U.G0205000/AeUmb.PI554389.v2.6U.G0369900/AeUmb.PI554389.v2.6U.G0142900/AeUmb.PI554389.v2.7U.G0549100/AeUmb.PI554389.v2.7U.G0098800/AeUmb.PI554389.v2.4U.G0797000/AeUmb.PI554389.v2.4U.G0175000/AeUmb.PI5…	20	0.8
BP	GO:1901615	organic hydroxy compound metabolic process	15	0.557091	1.56046	0.0141092	0.0431292	0.0236278	1241	tags=73%, list=26%, signal=54%	AeUmb.PI554389.v2.5U.G0511800/AeUmb.PI554389.v2.6U.G0324900/AeUmb.PI554389.v2.6U.G0491000/AeUmb.PI554389.v2.3U.G0222600/AeUmb.PI554389.v2.4U.G0972100/AeUmb.PI554389.v2.3U.G0099900/AeUmb.PI554389.v2.6U.G0184600/AeUmb.PI554389.v2.3U.G0155100/AeUmb.PI554389.v2.7U.G0296100/AeUmb.PI554389.v2.6U.G0539500/AeUmb.PI554389.v2.3U.G0071600	11	0.733333
BP	GO:0007154	cell communication	68	0.392783	1.34512	0.0145985	0.044373	0.0243092	2398	tags=74%, list=50%, signal=37%	AeUmb.PI554389.v2.5U.G0237000/AeUmb.PI554389.v2.5U.G0791500/AeUmb.PI554389.v2.6U.G0283900/AeUmb.PI554389.v2.4U.G0829500/AeUmb.PI554389.v2.6U.G0347200/AeUmb.PI554389.v2.5U.G0121100/AeUmb.PI554389.v2.1U.G0450000/AeUmb.PI554389.v2.2U.G0698900/AeUmb.PI554389.v2.4U.G0103900/AeUmb.PI554389.v2.5U.G0141300/AeUmb.PI554389.v2.5U.G0169000/AeUmb.PI554389.v2.7U.G0932000/AeUmb.PI554389.v2.1U.G0307900/AeUmb.PI5…	50	0.735294
MF	GO:0010181	FMN binding	10	0.617846	1.58973	0.0151064	0.0455346	0.0249456	462	tags=50%, list=10%, signal=45%	AeUmb.PI554389.v2.2U.G0169000/AeUmb.PI554389.v2.2U.G0580800/AeUmb.PI554389.v2.2U.G0197000/AeUmb.PI554389.v2.6U.G0491000/AeUmb.PI554389.v2.5U.G0719800	5	0.5
BP	GO:0006366	transcription by RNA polymerase II	28	0.471114	1.46419	0.01515	0.0455346	0.0249456	1635	tags=64%, list=34%, signal=43%	AeUmb.PI554389.v2.2U.G0319500/AeUmb.PI554389.v2.3U.G0693800/AeUmb.PI554389.v2.5U.G0670500/AeUmb.PI554389.v2.4U.G0936800/AeUmb.PI554389.v2.1U.G0557300/AeUmb.PI554389.v2.4U.G0995800/AeUmb.PI554389.v2.7U.G0531700/AeUmb.PI554389.v2.7U.G1052500/AeUmb.PI554389.v2.4U.G0708000/AeUmb.PI554389.v2.2U.G0560000/AeUmb.PI554389.v2.6U.G0398400/AeUmb.PI554389.v2.5U.G0898200/AeUmb.PI554389.v2.5U.G0205100/AeUmb.PI5…	18	0.642857
BP	GO:0060255	regulation of macromolecule metabolic process	181	0.336535	1.23319	0.0156984	0.0469209	0.025705	2596	tags=70%, list=54%, signal=33%	AeUmb.PI554389.v2.7U.G0066800/AeUmb.PI554389.v2.2U.G0319500/AeUmb.PI554389.v2.4U.G0611700/AeUmb.PI554389.v2.1U.G0140800/AeUmb.PI554389.v2.2U.G0140100/AeUmb.PI554389.v2.1U.G0260700/AeUmb.PI554389.v2.5U.G0670500/AeUmb.PI554389.v2.7U.G0698900/AeUmb.PI554389.v2.4U.G0897300/AeUmb.PI554389.v2.5U.G0262900/AeUmb.PI554389.v2.4U.G0936800/AeUmb.PI554389.v2.5U.G0528800/AeUmb.PI554389.v2.7U.G0236500/AeUmb.PI5…	126	0.696133
BP	GO:0006099	tricarboxylic acid cycle	11	0.598463	1.57345	0.0160371	0.0476684	0.0261146	1708	tags=91%, list=36%, signal=59%	AeUmb.PI554389.v2.6U.G0437300/AeUmb.PI554389.v2.5U.G0175000/AeUmb.PI554389.v2.6U.G0400600/AeUmb.PI554389.v2.6U.G0437400/AeUmb.PI554389.v2.6U.G0451400/AeUmb.PI554389.v2.4U.G0962500/AeUmb.PI554389.v2.1U.G0423600/AeUmb.PI554389.v2.2U.G0755300/AeUmb.PI554389.v2.3U.G0063200/AeUmb.PI554389.v2.2U.G0197800	10	0.909091
MF	GO:0016651	oxidoreductase activity, acting on NAD(P)H	12	0.582634	1.56179	0.016318	0.0482367	0.0264259	1077	tags=67%, list=23%, signal=52%	AeUmb.PI554389.v2.2U.G0169000/AeUmb.PI554389.v2.2U.G0580800/AeUmb.PI554389.v2.2U.G0388700/AeUmb.PI554389.v2.5U.G0398800/AeUmb.PI554389.v2.5U.G0917500/AeUmb.PI554389.v2.5U.G0693700/AeUmb.PI554389.v2.3U.G0448800/AeUmb.PI554389.v2.7U.G0414800	8	0.666667
BP	GO:0008610	lipid biosynthetic process	30	0.460621	1.44601	0.0166349	0.0486391	0.0266463	2122	tags=73%, list=44%, signal=41%	AeUmb.PI554389.v2.4U.G1018800/AeUmb.PI554389.v2.2U.G0103300/AeUmb.PI554389.v2.5U.G0883100/AeUmb.PI554389.v2.5U.G0121100/AeUmb.PI554389.v2.4U.G0235900/AeUmb.PI554389.v2.6U.G0448900/AeUmb.PI554389.v2.6U.G0184600/AeUmb.PI554389.v2.6U.G0369900/AeUmb.PI554389.v2.7U.G0680500/AeUmb.PI554389.v2.4U.G1009800/AeUmb.PI554389.v2.3U.G0669500/AeUmb.PI554389.v2.2U.G0284000/AeUmb.PI554389.v2.3U.G0071600/AeUmb.PI5…	22	0.733333
BP	GO:0019219	regulation of nucleobase-containing compound metabolic process	164	0.33857	1.23298	0.0165983	0.0486391	0.0266463	2596	tags=70%, list=54%, signal=33%	AeUmb.PI554389.v2.7U.G0066800/AeUmb.PI554389.v2.2U.G0319500/AeUmb.PI554389.v2.4U.G0611700/AeUmb.PI554389.v2.1U.G0140800/AeUmb.PI554389.v2.2U.G0140100/AeUmb.PI554389.v2.5U.G0670500/AeUmb.PI554389.v2.4U.G0897300/AeUmb.PI554389.v2.5U.G0262900/AeUmb.PI554389.v2.4U.G0936800/AeUmb.PI554389.v2.5U.G0528800/AeUmb.PI554389.v2.7U.G0236500/AeUmb.PI554389.v2.3U.G0154000/AeUmb.PI554389.v2.5U.G0221100/AeUmb.PI5…	114	0.695122

## Sheet: U89I6_vs_U17I6_Up
ONTOLOGY	ID	Description	setSize	enrichmentScore	NES	pvalue	p.adjust	qvalue	rank	leading_edge	core_enrichment	CoreGeneCount	GeneRatio
CC	GO:0030117	membrane coat	28	-0.585327	-2.94901	7.27639e-09	2.23749e-06	1.97994e-06	2453	tags=96%, list=33%, signal=65%	AeUmb.PI554389.v2.6U.G0016800/AeUmb.PI554389.v2.4U.G0838800/AeUmb.PI554389.v2.4U.G0924400/AeUmb.PI554389.v2.3U.G0139600/AeUmb.PI554389.v2.1U.G0302600/AeUmb.PI554389.v2.3U.G0207100/AeUmb.PI554389.v2.4U.G0976200/AeUmb.PI554389.v2.6U.G0233500/AeUmb.PI554389.v2.1U.G0382000/AeUmb.PI554389.v2.3U.G0139200/AeUmb.PI554389.v2.5U.G0913700/AeUmb.PI554389.v2.2U.G0886600/AeUmb.PI554389.v2.6U.G0387400/AeUmb.PI5…	27	0.964286
CC	GO:0048475	coated membrane	28	-0.585327	-2.94901	7.27639e-09	2.23749e-06	1.97994e-06	2453	tags=96%, list=33%, signal=65%	AeUmb.PI554389.v2.6U.G0016800/AeUmb.PI554389.v2.4U.G0838800/AeUmb.PI554389.v2.4U.G0924400/AeUmb.PI554389.v2.3U.G0139600/AeUmb.PI554389.v2.1U.G0302600/AeUmb.PI554389.v2.3U.G0207100/AeUmb.PI554389.v2.4U.G0976200/AeUmb.PI554389.v2.6U.G0233500/AeUmb.PI554389.v2.1U.G0382000/AeUmb.PI554389.v2.3U.G0139200/AeUmb.PI554389.v2.5U.G0913700/AeUmb.PI554389.v2.2U.G0886600/AeUmb.PI554389.v2.6U.G0387400/AeUmb.PI5…	27	0.964286
CC	GO:0031410	cytoplasmic vesicle	25	-0.571383	-2.78118	1.40958e-07	1.73378e-05	1.53421e-05	2453	tags=96%, list=33%, signal=65%	AeUmb.PI554389.v2.6U.G0016800/AeUmb.PI554389.v2.4U.G0838800/AeUmb.PI554389.v2.4U.G0924400/AeUmb.PI554389.v2.3U.G0139600/AeUmb.PI554389.v2.1U.G0302600/AeUmb.PI554389.v2.4U.G0976200/AeUmb.PI554389.v2.6U.G0233500/AeUmb.PI554389.v2.3U.G0139200/AeUmb.PI554389.v2.5U.G0913700/AeUmb.PI554389.v2.2U.G0886600/AeUmb.PI554389.v2.2U.G0769700/AeUmb.PI554389.v2.5U.G0532800/AeUmb.PI554389.v2.5U.G0953900/AeUmb.PI5…	24	0.96
CC	GO:0031982	vesicle	25	-0.571383	-2.78118	1.40958e-07	1.73378e-05	1.53421e-05	2453	tags=96%, list=33%, signal=65%	AeUmb.PI554389.v2.6U.G0016800/AeUmb.PI554389.v2.4U.G0838800/AeUmb.PI554389.v2.4U.G0924400/AeUmb.PI554389.v2.3U.G0139600/AeUmb.PI554389.v2.1U.G0302600/AeUmb.PI554389.v2.4U.G0976200/AeUmb.PI554389.v2.6U.G0233500/AeUmb.PI554389.v2.3U.G0139200/AeUmb.PI554389.v2.5U.G0913700/AeUmb.PI554389.v2.2U.G0886600/AeUmb.PI554389.v2.2U.G0769700/AeUmb.PI554389.v2.5U.G0532800/AeUmb.PI554389.v2.5U.G0953900/AeUmb.PI5…	24	0.96
CC	GO:0097708	intracellular vesicle	25	-0.571383	-2.78118	1.40958e-07	1.73378e-05	1.53421e-05	2453	tags=96%, list=33%, signal=65%	AeUmb.PI554389.v2.6U.G0016800/AeUmb.PI554389.v2.4U.G0838800/AeUmb.PI554389.v2.4U.G0924400/AeUmb.PI554389.v2.3U.G0139600/AeUmb.PI554389.v2.1U.G0302600/AeUmb.PI554389.v2.4U.G0976200/AeUmb.PI554389.v2.6U.G0233500/AeUmb.PI554389.v2.3U.G0139200/AeUmb.PI554389.v2.5U.G0913700/AeUmb.PI554389.v2.2U.G0886600/AeUmb.PI554389.v2.2U.G0769700/AeUmb.PI554389.v2.5U.G0532800/AeUmb.PI554389.v2.5U.G0953900/AeUmb.PI5…	24	0.96
CC	GO:0012506	vesicle membrane	21	-0.561754	-2.55446	2.2332e-06	0.000196203	0.000173619	2453	tags=95%, list=33%, signal=64%	AeUmb.PI554389.v2.6U.G0016800/AeUmb.PI554389.v2.4U.G0838800/AeUmb.PI554389.v2.4U.G0924400/AeUmb.PI554389.v2.3U.G0139600/AeUmb.PI554389.v2.1U.G0302600/AeUmb.PI554389.v2.4U.G0976200/AeUmb.PI554389.v2.6U.G0233500/AeUmb.PI554389.v2.3U.G0139200/AeUmb.PI554389.v2.5U.G0913700/AeUmb.PI554389.v2.2U.G0886600/AeUmb.PI554389.v2.5U.G0532800/AeUmb.PI554389.v2.5U.G0953900/AeUmb.PI554389.v2.1U.G0430000/AeUmb.PI5…	20	0.952381
CC	GO:0030659	cytoplasmic vesicle membrane	21	-0.561754	-2.55446	2.2332e-06	0.000196203	0.000173619	2453	tags=95%, list=33%, signal=64%	AeUmb.PI554389.v2.6U.G0016800/AeUmb.PI554389.v2.4U.G0838800/AeUmb.PI554389.v2.4U.G0924400/AeUmb.PI554389.v2.3U.G0139600/AeUmb.PI554389.v2.1U.G0302600/AeUmb.PI554389.v2.4U.G0976200/AeUmb.PI554389.v2.6U.G0233500/AeUmb.PI554389.v2.3U.G0139200/AeUmb.PI554389.v2.5U.G0913700/AeUmb.PI554389.v2.2U.G0886600/AeUmb.PI554389.v2.5U.G0532800/AeUmb.PI554389.v2.5U.G0953900/AeUmb.PI554389.v2.1U.G0430000/AeUmb.PI5…	20	0.952381
CC	GO:0030135	coated vesicle	20	-0.556048	-2.44438	7.15771e-06	0.000550249	0.000486913	2453	tags=95%, list=33%, signal=64%	AeUmb.PI554389.v2.6U.G0016800/AeUmb.PI554389.v2.4U.G0838800/AeUmb.PI554389.v2.4U.G0924400/AeUmb.PI554389.v2.3U.G0139600/AeUmb.PI554389.v2.1U.G0302600/AeUmb.PI554389.v2.4U.G0976200/AeUmb.PI554389.v2.6U.G0233500/AeUmb.PI554389.v2.3U.G0139200/AeUmb.PI554389.v2.5U.G0913700/AeUmb.PI554389.v2.2U.G0886600/AeUmb.PI554389.v2.5U.G0953900/AeUmb.PI554389.v2.1U.G0430000/AeUmb.PI554389.v2.4U.G1011100/AeUmb.PI5…	19	0.95
CC	GO:0030120	vesicle coat	19	-0.553689	-2.35938	1.1807e-05	0.000726129	0.000642548	2453	tags=95%, list=33%, signal=64%	AeUmb.PI554389.v2.6U.G0016800/AeUmb.PI554389.v2.4U.G0838800/AeUmb.PI554389.v2.4U.G0924400/AeUmb.PI554389.v2.3U.G0139600/AeUmb.PI554389.v2.1U.G0302600/AeUmb.PI554389.v2.4U.G0976200/AeUmb.PI554389.v2.6U.G0233500/AeUmb.PI554389.v2.3U.G0139200/AeUmb.PI554389.v2.5U.G0913700/AeUmb.PI554389.v2.2U.G0886600/AeUmb.PI554389.v2.5U.G0953900/AeUmb.PI554389.v2.1U.G0430000/AeUmb.PI554389.v2.4U.G1011100/AeUmb.PI5…	18	0.947368
CC	GO:0030662	coated vesicle membrane	19	-0.553689	-2.35938	1.1807e-05	0.000726129	0.000642548	2453	tags=95%, list=33%, signal=64%	AeUmb.PI554389.v2.6U.G0016800/AeUmb.PI554389.v2.4U.G0838800/AeUmb.PI554389.v2.4U.G0924400/AeUmb.PI554389.v2.3U.G0139600/AeUmb.PI554389.v2.1U.G0302600/AeUmb.PI554389.v2.4U.G0976200/AeUmb.PI554389.v2.6U.G0233500/AeUmb.PI554389.v2.3U.G0139200/AeUmb.PI554389.v2.5U.G0913700/AeUmb.PI554389.v2.2U.G0886600/AeUmb.PI554389.v2.5U.G0953900/AeUmb.PI554389.v2.1U.G0430000/AeUmb.PI554389.v2.4U.G1011100/AeUmb.PI5…	18	0.947368
CC	GO:0005794	Golgi apparatus	25	-0.47925	-2.33272	1.35237e-05	0.0007561	0.000669069	2453	tags=92%, list=33%, signal=62%	AeUmb.PI554389.v2.6U.G0016800/AeUmb.PI554389.v2.4U.G0838800/AeUmb.PI554389.v2.3U.G0139600/AeUmb.PI554389.v2.6U.G0228000/AeUmb.PI554389.v2.1U.G0302600/AeUmb.PI554389.v2.4U.G0976200/AeUmb.PI554389.v2.6U.G0233500/AeUmb.PI554389.v2.3U.G0139200/AeUmb.PI554389.v2.3U.G0311600/AeUmb.PI554389.v2.5U.G0913700/AeUmb.PI554389.v2.2U.G0769700/AeUmb.PI554389.v2.3U.G0427800/AeUmb.PI554389.v2.7U.G0456500/AeUmb.PI5…	23	0.92
MF	GO:0016614	oxidoreductase activity, acting on CH-OH group of donors	29	-0.421674	-2.15478	2.37432e-05	0.00121684	0.00107677	4342	tags=100%, list=58%, signal=42%	AeUmb.PI554389.v2.6U.G0391800/AeUmb.PI554389.v2.2U.G0586800/AeUmb.PI554389.v2.2U.G0362800/AeUmb.PI554389.v2.7U.G0198400/AeUmb.PI554389.v2.6U.G0184800/AeUmb.PI554389.v2.6U.G0720500/AeUmb.PI554389.v2.6U.G0039300/AeUmb.PI554389.v2.5U.G0676100/AeUmb.PI554389.v2.7U.G0309900/AeUmb.PI554389.v2.3U.G0518100/AeUmb.PI554389.v2.6U.G0547500/AeUmb.PI554389.v2.2U.G0322500/AeUmb.PI554389.v2.4U.G0937400/AeUmb.PI5…	28	0.965517
MF	GO:0016616	oxidoreductase activity, acting on the CH-OH group of donors, NAD or NADP as acceptor	28	-0.421617	-2.1242	7.72904e-05	0.00365643	0.00323556	4342	tags=100%, list=58%, signal=42%	AeUmb.PI554389.v2.6U.G0391800/AeUmb.PI554389.v2.2U.G0586800/AeUmb.PI554389.v2.2U.G0362800/AeUmb.PI554389.v2.6U.G0184800/AeUmb.PI554389.v2.6U.G0720500/AeUmb.PI554389.v2.6U.G0039300/AeUmb.PI554389.v2.5U.G0676100/AeUmb.PI554389.v2.7U.G0309900/AeUmb.PI554389.v2.3U.G0518100/AeUmb.PI554389.v2.6U.G0547500/AeUmb.PI554389.v2.2U.G0322500/AeUmb.PI554389.v2.4U.G0937400/AeUmb.PI554389.v2.7U.G0921100/AeUmb.PI5…	27	0.964286
BP	GO:0009072	aromatic amino acid metabolic process	24	-0.444701	-2.08579	0.00015825	0.00695169	0.00615152	3371	tags=96%, list=45%, signal=53%	AeUmb.PI554389.v2.4U.G0447000/AeUmb.PI554389.v2.2U.G0377100/AeUmb.PI554389.v2.7U.G0235400/AeUmb.PI554389.v2.6U.G0286100/AeUmb.PI554389.v2.2U.G0110900/AeUmb.PI554389.v2.2U.G0252200/AeUmb.PI554389.v2.2U.G0750800/AeUmb.PI554389.v2.5U.G0833300/AeUmb.PI554389.v2.7U.G0450700/AeUmb.PI554389.v2.6U.G0260400/AeUmb.PI554389.v2.1U.G0090700/AeUmb.PI554389.v2.1U.G0342300/AeUmb.PI554389.v2.6U.G0251200/AeUmb.PI5…	23	0.958333
MF	GO:0140359	ABC-type transporter activity	31	-0.386906	-1.94353	0.000223097	0.009147	0.00809413	4602	tags=100%, list=61%, signal=39%	AeUmb.PI554389.v2.7U.G0624800/AeUmb.PI554389.v2.7U.G0466000/AeUmb.PI554389.v2.7U.G0264400/AeUmb.PI554389.v2.7U.G0710300/AeUmb.PI554389.v2.3U.G0379000/AeUmb.PI554389.v2.1U.G0579900/AeUmb.PI554389.v2.5U.G0751400/AeUmb.PI554389.v2.3U.G0028200/AeUmb.PI554389.v2.3U.G0600500/AeUmb.PI554389.v2.7U.G0315600/AeUmb.PI554389.v2.2U.G0692500/AeUmb.PI554389.v2.5U.G0850400/AeUmb.PI554389.v2.7U.G0626400/AeUmb.PI5…	30	0.967742
BP	GO:0034470	ncRNA processing	13	-0.58833	-2.20144	0.000266269	0.0102347	0.00905664	3090	tags=100%, list=41%, signal=59%	AeUmb.PI554389.v2.4U.G1030000/AeUmb.PI554389.v2.3U.G0461200/AeUmb.PI554389.v2.6U.G0099600/AeUmb.PI554389.v2.7U.G0941500/AeUmb.PI554389.v2.6U.G0189800/AeUmb.PI554389.v2.7U.G0468100/AeUmb.PI554389.v2.5U.G0737900/AeUmb.PI554389.v2.3U.G0062000/AeUmb.PI554389.v2.4U.G0623300/AeUmb.PI554389.v2.7U.G0061100/AeUmb.PI554389.v2.5U.G0742600/AeUmb.PI554389.v2.5U.G0746700	12	0.923077
MF	GO:0043531	ADP binding	195	0.368097	1.35726	0.000334935	0.0121168	0.0107221	3590	tags=72%, list=48%, signal=38%	AeUmb.PI554389.v2.2U.G0863500/AeUmb.PI554389.v2.7U.G0825700/AeUmb.PI554389.v2.2U.G0863400/AeUmb.PI554389.v2.4U.G0033900/AeUmb.PI554389.v2.3U.G0650200/AeUmb.PI554389.v2.7U.G0759400/AeUmb.PI554389.v2.2U.G0002100/AeUmb.PI554389.v2.7U.G0833600/AeUmb.PI554389.v2.4U.G0025300/AeUmb.PI554389.v2.2U.G0002500/AeUmb.PI554389.v2.7U.G0834800/AeUmb.PI554389.v2.7U.G1052900/AeUmb.PI554389.v2.5U.G0026200/AeUmb.PI5…	140	0.717949
BP	GO:0006952	defense response	205	0.362174	1.33855	0.000426072	0.0145575	0.0128818	3499	tags=69%, list=47%, signal=38%	AeUmb.PI554389.v2.2U.G0863400/AeUmb.PI554389.v2.4U.G0033900/AeUmb.PI554389.v2.7U.G0759400/AeUmb.PI554389.v2.2U.G0002100/AeUmb.PI554389.v2.7U.G0833600/AeUmb.PI554389.v2.4U.G0025300/AeUmb.PI554389.v2.2U.G0002500/AeUmb.PI554389.v2.7U.G0834800/AeUmb.PI554389.v2.4U.G0187800/AeUmb.PI554389.v2.5U.G0026200/AeUmb.PI554389.v2.1U.G0034200/AeUmb.PI554389.v2.3U.G0580100/AeUmb.PI554389.v2.4U.G0424500/AeUmb.PI5…	141	0.687805
BP	GO:0009060	aerobic respiration	15	-0.537885	-2.13767	0.000480992	0.0147905	0.013088	3468	tags=100%, list=46%, signal=54%	AeUmb.PI554389.v2.7U.G0309900/AeUmb.PI554389.v2.5U.G0323400/AeUmb.PI554389.v2.2U.G0261600/AeUmb.PI554389.v2.3U.G0145800/AeUmb.PI554389.v2.5U.G0699000/AeUmb.PI554389.v2.7U.G0717700/AeUmb.PI554389.v2.6U.G0443300/AeUmb.PI554389.v2.2U.G0315700/AeUmb.PI554389.v2.2U.G0240300/AeUmb.PI554389.v2.3U.G0219600/AeUmb.PI554389.v2.4U.G0875900/AeUmb.PI554389.v2.2U.G0826100/AeUmb.PI554389.v2.4U.G0842600/AeUmb.PI5…	14	0.933333
BP	GO:0045333	cellular respiration	15	-0.537885	-2.13767	0.000480992	0.0147905	0.013088	3468	tags=100%, list=46%, signal=54%	AeUmb.PI554389.v2.7U.G0309900/AeUmb.PI554389.v2.5U.G0323400/AeUmb.PI554389.v2.2U.G0261600/AeUmb.PI554389.v2.3U.G0145800/AeUmb.PI554389.v2.5U.G0699000/AeUmb.PI554389.v2.7U.G0717700/AeUmb.PI554389.v2.6U.G0443300/AeUmb.PI554389.v2.2U.G0315700/AeUmb.PI554389.v2.2U.G0240300/AeUmb.PI554389.v2.3U.G0219600/AeUmb.PI554389.v2.4U.G0875900/AeUmb.PI554389.v2.2U.G0826100/AeUmb.PI554389.v2.4U.G0842600/AeUmb.PI5…	14	0.933333
BP	GO:0044272	sulfur compound biosynthetic process	21	-0.434486	-1.97573	0.000512655	0.0150135	0.0132854	4243	tags=100%, list=57%, signal=43%	AeUmb.PI554389.v2.3U.G0569100/AeUmb.PI554389.v2.6U.G0222900/AeUmb.PI554389.v2.4U.G0792300/AeUmb.PI554389.v2.7U.G0656900/AeUmb.PI554389.v2.5U.G0509400/AeUmb.PI554389.v2.3U.G0519100/AeUmb.PI554389.v2.1U.G0419900/AeUmb.PI554389.v2.7U.G0656100/AeUmb.PI554389.v2.5U.G0117900/AeUmb.PI554389.v2.3U.G0154300/AeUmb.PI554389.v2.3U.G0569000/AeUmb.PI554389.v2.6U.G0758900/AeUmb.PI554389.v2.5U.G0810800/AeUmb.PI5…	20	0.952381
CC	GO:0005856	cytoskeleton	19	-0.450746	-1.92072	0.000620015	0.0173322	0.0153372	2832	tags=95%, list=38%, signal=59%	AeUmb.PI554389.v2.5U.G0826000/AeUmb.PI554389.v2.2U.G0298900/AeUmb.PI554389.v2.3U.G0063300/AeUmb.PI554389.v2.7U.G0568700/AeUmb.PI554389.v2.2U.G0107000/AeUmb.PI554389.v2.4U.G0248300/AeUmb.PI554389.v2.1U.G0447300/AeUmb.PI554389.v2.6U.G0222400/AeUmb.PI554389.v2.5U.G0401200/AeUmb.PI554389.v2.3U.G0180800/AeUmb.PI554389.v2.1U.G0588700/AeUmb.PI554389.v2.6U.G0652300/AeUmb.PI554389.v2.1U.G0316300/AeUmb.PI5…	18	0.947368
BP	GO:0019318	hexose metabolic process	11	-0.62015	-2.18198	0.000836117	0.021123	0.0186916	2851	tags=100%, list=38%, signal=62%	AeUmb.PI554389.v2.2U.G0501300/AeUmb.PI554389.v2.6U.G0371900/AeUmb.PI554389.v2.2U.G0322500/AeUmb.PI554389.v2.2U.G0295800/AeUmb.PI554389.v2.4U.G0004600/AeUmb.PI554389.v2.5U.G0492300/AeUmb.PI554389.v2.6U.G0465200/AeUmb.PI554389.v2.7U.G0188800/AeUmb.PI554389.v2.5U.G0425200/AeUmb.PI554389.v2.5U.G0325100	10	0.909091
BP	GO:0006888	endoplasmic reticulum to Golgi vesicle-mediated transport	12	-0.570186	-2.09205	0.000807958	0.021123	0.0186916	3225	tags=100%, list=43%, signal=57%	AeUmb.PI554389.v2.4U.G0838800/AeUmb.PI554389.v2.4U.G0924400/AeUmb.PI554389.v2.5U.G0913700/AeUmb.PI554389.v2.2U.G0886600/AeUmb.PI554389.v2.7U.G0841600/AeUmb.PI554389.v2.7U.G0326700/AeUmb.PI554389.v2.4U.G1011100/AeUmb.PI554389.v2.2U.G0653300/AeUmb.PI554389.v2.3U.G0401800/AeUmb.PI554389.v2.5U.G0414700/AeUmb.PI554389.v2.6U.G0601000	11	0.916667
BP	GO:0009073	aromatic amino acid family biosynthetic process	12	-0.560418	-2.05621	0.000893005	0.021123	0.0186916	3298	tags=100%, list=44%, signal=56%	AeUmb.PI554389.v2.6U.G0286100/AeUmb.PI554389.v2.2U.G0252200/AeUmb.PI554389.v2.2U.G0750800/AeUmb.PI554389.v2.5U.G0833300/AeUmb.PI554389.v2.6U.G0260400/AeUmb.PI554389.v2.1U.G0342300/AeUmb.PI554389.v2.6U.G0251200/AeUmb.PI554389.v2.5U.G0561200/AeUmb.PI554389.v2.1U.G0389400/AeUmb.PI554389.v2.2U.G0056200/AeUmb.PI554389.v2.7U.G0717200	11	0.916667
BP	GO:0006644	phospholipid metabolic process	24	-0.397132	-1.86267	0.000866558	0.021123	0.0186916	4523	tags=100%, list=60%, signal=40%	AeUmb.PI554389.v2.Un.G0010200/AeUmb.PI554389.v2.7U.G0658600/AeUmb.PI554389.v2.3U.G0698100/AeUmb.PI554389.v2.6U.G0824200/AeUmb.PI554389.v2.3U.G0239300/AeUmb.PI554389.v2.6U.G0670100/AeUmb.PI554389.v2.2U.G0528400/AeUmb.PI554389.v2.4U.G0164700/AeUmb.PI554389.v2.6U.G0074800/AeUmb.PI554389.v2.5U.G0568800/AeUmb.PI554389.v2.7U.G0098800/AeUmb.PI554389.v2.7U.G0716300/AeUmb.PI554389.v2.4U.G0138600/AeUmb.PI5…	23	0.958333
BP	GO:0006099	tricarboxylic acid cycle	13	-0.537741	-2.01215	0.00104713	0.0232317	0.0205576	3468	tags=100%, list=46%, signal=54%	AeUmb.PI554389.v2.7U.G0309900/AeUmb.PI554389.v2.5U.G0323400/AeUmb.PI554389.v2.2U.G0261600/AeUmb.PI554389.v2.3U.G0145800/AeUmb.PI554389.v2.5U.G0699000/AeUmb.PI554389.v2.7U.G0717700/AeUmb.PI554389.v2.2U.G0315700/AeUmb.PI554389.v2.2U.G0240300/AeUmb.PI554389.v2.3U.G0219600/AeUmb.PI554389.v2.4U.G0875900/AeUmb.PI554389.v2.2U.G0826100/AeUmb.PI554389.v2.5U.G0030900	12	0.923077
CC	GO:0005798	Golgi-associated vesicle	14	-0.520111	-1.98135	0.00109548	0.0232317	0.0205576	2453	tags=93%, list=33%, signal=63%	AeUmb.PI554389.v2.6U.G0016800/AeUmb.PI554389.v2.4U.G0838800/AeUmb.PI554389.v2.3U.G0139600/AeUmb.PI554389.v2.1U.G0302600/AeUmb.PI554389.v2.4U.G0976200/AeUmb.PI554389.v2.6U.G0233500/AeUmb.PI554389.v2.3U.G0139200/AeUmb.PI554389.v2.5U.G0913700/AeUmb.PI554389.v2.1U.G0430000/AeUmb.PI554389.v2.1U.G0489600/AeUmb.PI554389.v2.7U.G0605900/AeUmb.PI554389.v2.5U.G0305500/AeUmb.PI554389.v2.5U.G0284700	13	0.928571
CC	GO:0030660	Golgi-associated vesicle membrane	14	-0.520111	-1.98135	0.00109548	0.0232317	0.0205576	2453	tags=93%, list=33%, signal=63%	AeUmb.PI554389.v2.6U.G0016800/AeUmb.PI554389.v2.4U.G0838800/AeUmb.PI554389.v2.3U.G0139600/AeUmb.PI554389.v2.1U.G0302600/AeUmb.PI554389.v2.4U.G0976200/AeUmb.PI554389.v2.6U.G0233500/AeUmb.PI554389.v2.3U.G0139200/AeUmb.PI554389.v2.5U.G0913700/AeUmb.PI554389.v2.1U.G0430000/AeUmb.PI554389.v2.1U.G0489600/AeUmb.PI554389.v2.7U.G0605900/AeUmb.PI554389.v2.5U.G0305500/AeUmb.PI554389.v2.5U.G0284700	13	0.928571
BP	GO:0005996	monosaccharide metabolic process	19	-0.43303	-1.84523	0.00119313	0.0244591	0.0216437	4253	tags=100%, list=57%, signal=43%	AeUmb.PI554389.v2.2U.G0722700/AeUmb.PI554389.v2.5U.G0529900/AeUmb.PI554389.v2.2U.G0501300/AeUmb.PI554389.v2.7U.G0332600/AeUmb.PI554389.v2.2U.G0691600/AeUmb.PI554389.v2.6U.G0371900/AeUmb.PI554389.v2.2U.G0322500/AeUmb.PI554389.v2.2U.G0295800/AeUmb.PI554389.v2.4U.G0004600/AeUmb.PI554389.v2.6U.G0274400/AeUmb.PI554389.v2.3U.G0368000/AeUmb.PI554389.v2.5U.G0492300/AeUmb.PI554389.v2.6U.G0465200/AeUmb.PI5…	18	0.947368
MF	GO:0051082	unfolded protein binding	12	-0.550114	-2.0184	0.00128203	0.0254338	0.0225063	3375	tags=100%, list=45%, signal=55%	AeUmb.PI554389.v2.2U.G0835600/AeUmb.PI554389.v2.4U.G0409100/AeUmb.PI554389.v2.5U.G0454600/AeUmb.PI554389.v2.4U.G0717000/AeUmb.PI554389.v2.4U.G0716400/AeUmb.PI554389.v2.1U.G0220000/AeUmb.PI554389.v2.4U.G0301700/AeUmb.PI554389.v2.7U.G0538300/AeUmb.PI554389.v2.5U.G0642700/AeUmb.PI554389.v2.5U.G0442600/AeUmb.PI554389.v2.4U.G1020300	11	0.916667
BP	GO:0072522	purine-containing compound biosynthetic process	22	-0.390273	-1.77543	0.00193032	0.0370983	0.0328281	2154	tags=91%, list=29%, signal=65%	AeUmb.PI554389.v2.4U.G0004100/AeUmb.PI554389.v2.4U.G0052200/AeUmb.PI554389.v2.2U.G0268000/AeUmb.PI554389.v2.1U.G0462200/AeUmb.PI554389.v2.5U.G0331400/AeUmb.PI554389.v2.3U.G0651300/AeUmb.PI554389.v2.4U.G0159200/AeUmb.PI554389.v2.3U.G0094500/AeUmb.PI554389.v2.1U.G0294000/AeUmb.PI554389.v2.6U.G0758900/AeUmb.PI554389.v2.7U.G0922100/AeUmb.PI554389.v2.5U.G0810800/AeUmb.PI554389.v2.7U.G0302300/AeUmb.PI5…	20	0.909091
MF	GO:0008238	exopeptidase activity	25	-0.367596	-1.78926	0.00201117	0.0374808	0.0331666	3838	tags=96%, list=51%, signal=47%	AeUmb.PI554389.v2.1U.G0368900/AeUmb.PI554389.v2.2U.G0775100/AeUmb.PI554389.v2.1U.G0317700/AeUmb.PI554389.v2.3U.G0700400/AeUmb.PI554389.v2.4U.G0974600/AeUmb.PI554389.v2.1U.G0217100/AeUmb.PI554389.v2.3U.G0279600/AeUmb.PI554389.v2.1U.G0332400/AeUmb.PI554389.v2.7U.G0209400/AeUmb.PI554389.v2.4U.G0592000/AeUmb.PI554389.v2.6U.G0464700/AeUmb.PI554389.v2.4U.G0995700/AeUmb.PI554389.v2.3U.G0037700/AeUmb.PI5…	24	0.96
MF	GO:0008408	3'-5' exonuclease activity	10	0.679541	1.74721	0.00266951	0.0482868	0.0427288	277	tags=50%, list=4%, signal=48%	AeUmb.PI554389.v2.3U.G0095600/AeUmb.PI554389.v2.3U.G0095000/AeUmb.PI554389.v2.3U.G0086100/AeUmb.PI554389.v2.3U.G0094700/AeUmb.PI554389.v2.3U.G0092300	5	0.5

## Sheet: U89I6_vs_U17I6_Down
ONTOLOGY	ID	Description	setSize	enrichmentScore	NES	pvalue	p.adjust	qvalue	rank	leading_edge	core_enrichment	CoreGeneCount	GeneRatio
BP	GO:1901566	organonitrogen compound biosynthetic process	258	0.445562	1.66175	1e-10	6.78e-08	4.42105e-08	3425	tags=80%, list=48%, signal=43%	AeUmb.PI554389.v2.6U.G0611800/AeUmb.PI554389.v2.6U.G0326600/AeUmb.PI554389.v2.4U.G0487000/AeUmb.PI554389.v2.7U.G0081800/AeUmb.PI554389.v2.7U.G0808300/AeUmb.PI554389.v2.1U.G0325500/AeUmb.PI554389.v2.4U.G0681800/AeUmb.PI554389.v2.4U.G0063100/AeUmb.PI554389.v2.1U.G0255100/AeUmb.PI554389.v2.2U.G0631400/AeUmb.PI554389.v2.1U.G0167500/AeUmb.PI554389.v2.5U.G0607900/AeUmb.PI554389.v2.4U.G0915500/AeUmb.PI5…	207	0.802326
BP	GO:0043604	amide biosynthetic process	145	0.45741	1.65692	1.95997e-08	5.43899e-06	3.54661e-06	3383	tags=84%, list=48%, signal=45%	AeUmb.PI554389.v2.6U.G0611800/AeUmb.PI554389.v2.6U.G0326600/AeUmb.PI554389.v2.7U.G0081800/AeUmb.PI554389.v2.2U.G0631400/AeUmb.PI554389.v2.1U.G0167500/AeUmb.PI554389.v2.5U.G0747800/AeUmb.PI554389.v2.4U.G0689600/AeUmb.PI554389.v2.7U.G0900500/AeUmb.PI554389.v2.4U.G0950700/AeUmb.PI554389.v2.5U.G0371000/AeUmb.PI554389.v2.4U.G0145500/AeUmb.PI554389.v2.7U.G0121200/AeUmb.PI554389.v2.2U.G0207500/AeUmb.PI5…	122	0.841379
CC	GO:0043226	organelle	497	0.364731	1.39252	3.20884e-08	5.43899e-06	3.54661e-06	3469	tags=67%, list=49%, signal=37%	AeUmb.PI554389.v2.1U.G0269200/AeUmb.PI554389.v2.6U.G0611800/AeUmb.PI554389.v2.4U.G0160900/AeUmb.PI554389.v2.5U.G0353800/AeUmb.PI554389.v2.6U.G0402300/AeUmb.PI554389.v2.7U.G0840300/AeUmb.PI554389.v2.3U.G0409800/AeUmb.PI554389.v2.4U.G0131200/AeUmb.PI554389.v2.3U.G0291500/AeUmb.PI554389.v2.6U.G0016400/AeUmb.PI554389.v2.5U.G0797100/AeUmb.PI554389.v2.6U.G0763700/AeUmb.PI554389.v2.6U.G0181400/AeUmb.PI5…	331	0.665996
CC	GO:0043229	intracellular organelle	497	0.364731	1.39252	3.20884e-08	5.43899e-06	3.54661e-06	3469	tags=67%, list=49%, signal=37%	AeUmb.PI554389.v2.1U.G0269200/AeUmb.PI554389.v2.6U.G0611800/AeUmb.PI554389.v2.4U.G0160900/AeUmb.PI554389.v2.5U.G0353800/AeUmb.PI554389.v2.6U.G0402300/AeUmb.PI554389.v2.7U.G0840300/AeUmb.PI554389.v2.3U.G0409800/AeUmb.PI554389.v2.4U.G0131200/AeUmb.PI554389.v2.3U.G0291500/AeUmb.PI554389.v2.6U.G0016400/AeUmb.PI554389.v2.5U.G0797100/AeUmb.PI554389.v2.6U.G0763700/AeUmb.PI554389.v2.6U.G0181400/AeUmb.PI5…	331	0.665996
BP	GO:0043043	peptide biosynthetic process	141	0.454529	1.64329	6.13478e-08	8.31876e-06	5.42444e-06	3383	tags=84%, list=48%, signal=45%	AeUmb.PI554389.v2.6U.G0326600/AeUmb.PI554389.v2.7U.G0081800/AeUmb.PI554389.v2.2U.G0631400/AeUmb.PI554389.v2.1U.G0167500/AeUmb.PI554389.v2.5U.G0747800/AeUmb.PI554389.v2.4U.G0689600/AeUmb.PI554389.v2.7U.G0900500/AeUmb.PI554389.v2.4U.G0950700/AeUmb.PI554389.v2.5U.G0371000/AeUmb.PI554389.v2.4U.G0145500/AeUmb.PI554389.v2.2U.G0207500/AeUmb.PI554389.v2.6U.G0142700/AeUmb.PI554389.v2.5U.G0673700/AeUmb.PI5…	118	0.836879
BP	GO:0048507	meristem development	16	-0.702534	-2.88119	1.0274e-07	9.95107e-06	6.48882e-06	2118	tags=94%, list=30%, signal=66%	AeUmb.PI554389.v2.4U.G0072000/AeUmb.PI554389.v2.6U.G0671700/AeUmb.PI554389.v2.5U.G0388600/AeUmb.PI554389.v2.3U.G0289600/AeUmb.PI554389.v2.6U.G0782200/AeUmb.PI554389.v2.6U.G0115400/AeUmb.PI554389.v2.3U.G0329400/AeUmb.PI554389.v2.6U.G0550600/AeUmb.PI554389.v2.6U.G0081100/AeUmb.PI554389.v2.1U.G0514800/AeUmb.PI554389.v2.5U.G0151200/AeUmb.PI554389.v2.2U.G0018900/AeUmb.PI554389.v2.1U.G0244800/AeUmb.PI5…	15	0.9375
BP	GO:0006412	translation	140	0.453694	1.63961	9.70022e-08	9.95107e-06	6.48882e-06	3383	tags=84%, list=48%, signal=45%	AeUmb.PI554389.v2.6U.G0326600/AeUmb.PI554389.v2.7U.G0081800/AeUmb.PI554389.v2.2U.G0631400/AeUmb.PI554389.v2.5U.G0747800/AeUmb.PI554389.v2.4U.G0689600/AeUmb.PI554389.v2.7U.G0900500/AeUmb.PI554389.v2.4U.G0950700/AeUmb.PI554389.v2.5U.G0371000/AeUmb.PI554389.v2.4U.G0145500/AeUmb.PI554389.v2.2U.G0207500/AeUmb.PI554389.v2.6U.G0142700/AeUmb.PI554389.v2.5U.G0673700/AeUmb.PI554389.v2.5U.G0718200/AeUmb.PI5…	117	0.835714
BP	GO:0044281	small molecule metabolic process	166	0.438243	1.59987	1.3384e-07	1.00826e-05	6.57459e-06	2943	tags=69%, list=42%, signal=41%	AeUmb.PI554389.v2.6U.G0611800/AeUmb.PI554389.v2.6U.G0750900/AeUmb.PI554389.v2.5U.G0605400/AeUmb.PI554389.v2.5U.G0304100/AeUmb.PI554389.v2.4U.G0487000/AeUmb.PI554389.v2.7U.G0273700/AeUmb.PI554389.v2.7U.G0808300/AeUmb.PI554389.v2.7U.G0926800/AeUmb.PI554389.v2.4U.G0681800/AeUmb.PI554389.v2.6U.G0380900/AeUmb.PI554389.v2.3U.G0222600/AeUmb.PI554389.v2.5U.G0393900/AeUmb.PI554389.v2.2U.G0170900/AeUmb.PI5…	115	0.692771
BP	GO:0043603	amide metabolic process	168	0.433556	1.58371	1.27517e-07	1.00826e-05	6.57459e-06	3407	tags=80%, list=48%, signal=42%	AeUmb.PI554389.v2.6U.G0611800/AeUmb.PI554389.v2.6U.G0326600/AeUmb.PI554389.v2.7U.G0081800/AeUmb.PI554389.v2.6U.G0578300/AeUmb.PI554389.v2.2U.G0631400/AeUmb.PI554389.v2.1U.G0167500/AeUmb.PI554389.v2.5U.G0747800/AeUmb.PI554389.v2.4U.G0689600/AeUmb.PI554389.v2.7U.G0900500/AeUmb.PI554389.v2.4U.G0950700/AeUmb.PI554389.v2.5U.G0371000/AeUmb.PI554389.v2.4U.G0145500/AeUmb.PI554389.v2.7U.G0121200/AeUmb.PI5…	134	0.797619
BP	GO:0010073	meristem maintenance	15	-0.702435	-2.79912	3.16562e-07	2.14629e-05	1.39954e-05	2118	tags=93%, list=30%, signal=66%	AeUmb.PI554389.v2.4U.G0072000/AeUmb.PI554389.v2.5U.G0388600/AeUmb.PI554389.v2.3U.G0289600/AeUmb.PI554389.v2.6U.G0782200/AeUmb.PI554389.v2.6U.G0115400/AeUmb.PI554389.v2.3U.G0329400/AeUmb.PI554389.v2.6U.G0550600/AeUmb.PI554389.v2.6U.G0081100/AeUmb.PI554389.v2.1U.G0514800/AeUmb.PI554389.v2.5U.G0151200/AeUmb.PI554389.v2.2U.G0018900/AeUmb.PI554389.v2.1U.G0244800/AeUmb.PI554389.v2.3U.G0099600/AeUmb.PI5…	14	0.933333
BP	GO:0006082	organic acid metabolic process	93	0.477358	1.67981	7.45e-07	3.88546e-05	2.5336e-05	2101	tags=59%, list=30%, signal=42%	AeUmb.PI554389.v2.6U.G0611800/AeUmb.PI554389.v2.5U.G0304100/AeUmb.PI554389.v2.4U.G0487000/AeUmb.PI554389.v2.7U.G0808300/AeUmb.PI554389.v2.7U.G0926800/AeUmb.PI554389.v2.4U.G0681800/AeUmb.PI554389.v2.6U.G0380900/AeUmb.PI554389.v2.3U.G0222600/AeUmb.PI554389.v2.5U.G0393900/AeUmb.PI554389.v2.2U.G0170900/AeUmb.PI554389.v2.4U.G0063100/AeUmb.PI554389.v2.6U.G0324900/AeUmb.PI554389.v2.4U.G0171200/AeUmb.PI5…	55	0.591398
BP	GO:0043436	oxoacid metabolic process	93	0.477358	1.67981	7.45e-07	3.88546e-05	2.5336e-05	2101	tags=59%, list=30%, signal=42%	AeUmb.PI554389.v2.6U.G0611800/AeUmb.PI554389.v2.5U.G0304100/AeUmb.PI554389.v2.4U.G0487000/AeUmb.PI554389.v2.7U.G0808300/AeUmb.PI554389.v2.7U.G0926800/AeUmb.PI554389.v2.4U.G0681800/AeUmb.PI554389.v2.6U.G0380900/AeUmb.PI554389.v2.3U.G0222600/AeUmb.PI554389.v2.5U.G0393900/AeUmb.PI554389.v2.2U.G0170900/AeUmb.PI554389.v2.4U.G0063100/AeUmb.PI554389.v2.6U.G0324900/AeUmb.PI554389.v2.4U.G0171200/AeUmb.PI5…	55	0.591398
BP	GO:0006518	peptide metabolic process	162	0.428994	1.56424	7.10943e-07	3.88546e-05	2.5336e-05	3407	tags=79%, list=48%, signal=42%	AeUmb.PI554389.v2.6U.G0326600/AeUmb.PI554389.v2.7U.G0081800/AeUmb.PI554389.v2.6U.G0578300/AeUmb.PI554389.v2.2U.G0631400/AeUmb.PI554389.v2.1U.G0167500/AeUmb.PI554389.v2.5U.G0747800/AeUmb.PI554389.v2.4U.G0689600/AeUmb.PI554389.v2.7U.G0900500/AeUmb.PI554389.v2.4U.G0950700/AeUmb.PI554389.v2.5U.G0371000/AeUmb.PI554389.v2.4U.G0145500/AeUmb.PI554389.v2.2U.G0207500/AeUmb.PI554389.v2.4U.G0401600/AeUmb.PI5…	128	0.790123
BP	GO:0019752	carboxylic acid metabolic process	91	0.478379	1.68035	8.13113e-07	3.93779e-05	2.56773e-05	2101	tags=59%, list=30%, signal=42%	AeUmb.PI554389.v2.6U.G0611800/AeUmb.PI554389.v2.5U.G0304100/AeUmb.PI554389.v2.4U.G0487000/AeUmb.PI554389.v2.7U.G0808300/AeUmb.PI554389.v2.7U.G0926800/AeUmb.PI554389.v2.4U.G0681800/AeUmb.PI554389.v2.6U.G0380900/AeUmb.PI554389.v2.3U.G0222600/AeUmb.PI554389.v2.5U.G0393900/AeUmb.PI554389.v2.2U.G0170900/AeUmb.PI554389.v2.4U.G0063100/AeUmb.PI554389.v2.6U.G0324900/AeUmb.PI554389.v2.4U.G0171200/AeUmb.PI5…	54	0.593407
CC	GO:0005737	cytoplasm	155	0.428227	1.55736	8.81311e-07	3.98352e-05	2.59755e-05	2324	tags=60%, list=33%, signal=41%	AeUmb.PI554389.v2.2U.G0031400/AeUmb.PI554389.v2.5U.G0353800/AeUmb.PI554389.v2.7U.G0840300/AeUmb.PI554389.v2.2U.G0630400/AeUmb.PI554389.v2.2U.G0228500/AeUmb.PI554389.v2.6U.G0016400/AeUmb.PI554389.v2.2U.G0631400/AeUmb.PI554389.v2.2U.G0463900/AeUmb.PI554389.v2.4U.G0657800/AeUmb.PI554389.v2.5U.G0335400/AeUmb.PI554389.v2.5U.G0747800/AeUmb.PI554389.v2.4U.G0689600/AeUmb.PI554389.v2.2U.G0057300/AeUmb.PI5…	93	0.6
BP	GO:0032196	transposition	13	-0.727286	-2.74282	1.62696e-06	6.89424e-05	4.49555e-05	1941	tags=100%, list=27%, signal=73%	AeUmb.PI554389.v2.2U.G0465300/AeUmb.PI554389.v2.3U.G0544200/AeUmb.PI554389.v2.7U.G0695800/AeUmb.PI554389.v2.7U.G0971600/AeUmb.PI554389.v2.4U.G0102300/AeUmb.PI554389.v2.1U.G0052100/AeUmb.PI554389.v2.7U.G0551000/AeUmb.PI554389.v2.5U.G0046200/AeUmb.PI554389.v2.7U.G0720100/AeUmb.PI554389.v2.6U.G0043100/AeUmb.PI554389.v2.5U.G0626000/AeUmb.PI554389.v2.2U.G0464800	12	0.923077
MF	GO:0003743	translation initiation factor activity	11	0.830221	2.18751	1.94206e-06	7.7454e-05	5.05056e-05	1211	tags=100%, list=17%, signal=83%	AeUmb.PI554389.v2.6U.G0326600/AeUmb.PI554389.v2.2U.G0228500/AeUmb.PI554389.v2.7U.G0081800/AeUmb.PI554389.v2.4U.G0657800/AeUmb.PI554389.v2.5U.G0747800/AeUmb.PI554389.v2.4U.G0689600/AeUmb.PI554389.v2.6U.G0678600/AeUmb.PI554389.v2.2U.G0144700/AeUmb.PI554389.v2.6U.G0460500/AeUmb.PI554389.v2.4U.G0742500/AeUmb.PI554389.v2.5U.G0961100	11	1
MF	GO:0140098	catalytic activity, acting on RNA	74	0.485177	1.67681	5.01182e-06	0.000188778	0.000123097	2540	tags=65%, list=36%, signal=42%	AeUmb.PI554389.v2.2U.G0785400/AeUmb.PI554389.v2.5U.G0304100/AeUmb.PI554389.v2.3U.G0430300/AeUmb.PI554389.v2.2U.G0631400/AeUmb.PI554389.v2.6U.G0694800/AeUmb.PI554389.v2.7U.G0876200/AeUmb.PI554389.v2.7U.G0900500/AeUmb.PI554389.v2.5U.G0371000/AeUmb.PI554389.v2.4U.G0145500/AeUmb.PI554389.v2.6U.G0176500/AeUmb.PI554389.v2.2U.G0583100/AeUmb.PI554389.v2.6U.G0567200/AeUmb.PI554389.v2.1U.G0135400/AeUmb.PI5…	48	0.648649
CC	GO:0005840	ribosome	109	0.442823	1.5758	5.42658e-06	0.000193643	0.000126269	3383	tags=83%, list=48%, signal=44%	AeUmb.PI554389.v2.4U.G0950700/AeUmb.PI554389.v2.6U.G0142700/AeUmb.PI554389.v2.5U.G0673700/AeUmb.PI554389.v2.5U.G0718200/AeUmb.PI554389.v2.1U.G0455600/AeUmb.PI554389.v2.1U.G0253600/AeUmb.PI554389.v2.5U.G0797600/AeUmb.PI554389.v2.7U.G0906600/AeUmb.PI554389.v2.7U.G0283200/AeUmb.PI554389.v2.7U.G0122700/AeUmb.PI554389.v2.3U.G0232500/AeUmb.PI554389.v2.6U.G0499400/AeUmb.PI554389.v2.2U.G0473300/AeUmb.PI5…	91	0.834862
CC	GO:0031090	organelle membrane	49	0.532551	1.77078	8.68723e-06	0.000294497	0.000192034	2320	tags=76%, list=33%, signal=51%	AeUmb.PI554389.v2.5U.G0353800/AeUmb.PI554389.v2.7U.G0840300/AeUmb.PI554389.v2.6U.G0016400/AeUmb.PI554389.v2.2U.G0463900/AeUmb.PI554389.v2.5U.G0335400/AeUmb.PI554389.v2.5U.G0855500/AeUmb.PI554389.v2.6U.G0471000/AeUmb.PI554389.v2.6U.G0188600/AeUmb.PI554389.v2.5U.G0180100/AeUmb.PI554389.v2.5U.G0926500/AeUmb.PI554389.v2.2U.G0359600/AeUmb.PI554389.v2.5U.G0319600/AeUmb.PI554389.v2.7U.G0988100/AeUmb.PI5…	37	0.755102
MF	GO:0003735	structural constituent of ribosome	112	0.442269	1.57713	1.04899e-05	0.000338675	0.000220841	3383	tags=84%, list=48%, signal=45%	AeUmb.PI554389.v2.4U.G0950700/AeUmb.PI554389.v2.6U.G0142700/AeUmb.PI554389.v2.5U.G0673700/AeUmb.PI554389.v2.5U.G0718200/AeUmb.PI554389.v2.1U.G0455600/AeUmb.PI554389.v2.1U.G0253600/AeUmb.PI554389.v2.5U.G0797600/AeUmb.PI554389.v2.7U.G0906600/AeUmb.PI554389.v2.7U.G0283200/AeUmb.PI554389.v2.7U.G0122700/AeUmb.PI554389.v2.3U.G0232500/AeUmb.PI554389.v2.6U.G0499400/AeUmb.PI554389.v2.2U.G0473300/AeUmb.PI5…	94	0.839286
CC	GO:0043227	membrane-bounded organelle	231	0.379801	1.40961	1.68948e-05	0.000477278	0.00031122	3469	tags=74%, list=49%, signal=39%	AeUmb.PI554389.v2.1U.G0269200/AeUmb.PI554389.v2.6U.G0611800/AeUmb.PI554389.v2.5U.G0353800/AeUmb.PI554389.v2.6U.G0402300/AeUmb.PI554389.v2.7U.G0840300/AeUmb.PI554389.v2.3U.G0409800/AeUmb.PI554389.v2.4U.G0131200/AeUmb.PI554389.v2.6U.G0016400/AeUmb.PI554389.v2.5U.G0797100/AeUmb.PI554389.v2.6U.G0181400/AeUmb.PI554389.v2.7U.G0654500/AeUmb.PI554389.v2.7U.G0310400/AeUmb.PI554389.v2.2U.G0463900/AeUmb.PI5…	170	0.735931
CC	GO:0043231	intracellular membrane-bounded organelle	231	0.379801	1.40961	1.68948e-05	0.000477278	0.00031122	3469	tags=74%, list=49%, signal=39%	AeUmb.PI554389.v2.1U.G0269200/AeUmb.PI554389.v2.6U.G0611800/AeUmb.PI554389.v2.5U.G0353800/AeUmb.PI554389.v2.6U.G0402300/AeUmb.PI554389.v2.7U.G0840300/AeUmb.PI554389.v2.3U.G0409800/AeUmb.PI554389.v2.4U.G0131200/AeUmb.PI554389.v2.6U.G0016400/AeUmb.PI554389.v2.5U.G0797100/AeUmb.PI554389.v2.6U.G0181400/AeUmb.PI554389.v2.7U.G0654500/AeUmb.PI554389.v2.7U.G0310400/AeUmb.PI554389.v2.2U.G0463900/AeUmb.PI5…	170	0.735931
CC	GO:0016020	membrane	433	0.347589	1.32141	1.66155e-05	0.000477278	0.00031122	3341	tags=62%, list=47%, signal=35%	AeUmb.PI554389.v2.3U.G0110600/AeUmb.PI554389.v2.5U.G0618600/AeUmb.PI554389.v2.5U.G0353800/AeUmb.PI554389.v2.7U.G0840300/AeUmb.PI554389.v2.7U.G0273700/AeUmb.PI554389.v2.6U.G0777600/AeUmb.PI554389.v2.6U.G0629300/AeUmb.PI554389.v2.6U.G0016400/AeUmb.PI554389.v2.6U.G0421700/AeUmb.PI554389.v2.6U.G0123500/AeUmb.PI554389.v2.2U.G0334800/AeUmb.PI554389.v2.6U.G0578300/AeUmb.PI554389.v2.3U.G0195000/AeUmb.PI5…	270	0.623557
CC	GO:0098796	membrane protein complex	69	0.4751	1.63234	2.19212e-05	0.000550466	0.000358944	3249	tags=83%, list=46%, signal=45%	AeUmb.PI554389.v2.5U.G0353800/AeUmb.PI554389.v2.7U.G0273700/AeUmb.PI554389.v2.3U.G0195000/AeUmb.PI554389.v2.2U.G0463900/AeUmb.PI554389.v2.2U.G0057300/AeUmb.PI554389.v2.3U.G0224900/AeUmb.PI554389.v2.6U.G0188600/AeUmb.PI554389.v2.5U.G0704500/AeUmb.PI554389.v2.3U.G0164400/AeUmb.PI554389.v2.7U.G0988100/AeUmb.PI554389.v2.4U.G0771900/AeUmb.PI554389.v2.4U.G0862600/AeUmb.PI554389.v2.5U.G0237400/AeUmb.PI5…	57	0.826087
MF	GO:0003723	RNA binding	216	0.382663	1.41589	2.19212e-05	0.000550466	0.000358944	2605	tags=57%, list=37%, signal=37%	AeUmb.PI554389.v2.1U.G0269200/AeUmb.PI554389.v2.7U.G0156500/AeUmb.PI554389.v2.7U.G0198500/AeUmb.PI554389.v2.1U.G0419400/AeUmb.PI554389.v2.3U.G0430300/AeUmb.PI554389.v2.4U.G0980100/AeUmb.PI554389.v2.2U.G0179800/AeUmb.PI554389.v2.6U.G0181400/AeUmb.PI554389.v2.6U.G0572200/AeUmb.PI554389.v2.5U.G0718400/AeUmb.PI554389.v2.5U.G0747800/AeUmb.PI554389.v2.2U.G0069900/AeUmb.PI554389.v2.3U.G0400600/AeUmb.PI5…	124	0.574074
CC	GO:0032991	protein-containing complex	348	0.354963	1.34022	2.10835e-05	0.000550466	0.000358944	3330	tags=61%, list=47%, signal=34%	AeUmb.PI554389.v2.4U.G0914600/AeUmb.PI554389.v2.4U.G0160900/AeUmb.PI554389.v2.5U.G0353800/AeUmb.PI554389.v2.6U.G0402300/AeUmb.PI554389.v2.2U.G0630400/AeUmb.PI554389.v2.2U.G0228500/AeUmb.PI554389.v2.2U.G0100400/AeUmb.PI554389.v2.4U.G0131200/AeUmb.PI554389.v2.7U.G0273700/AeUmb.PI554389.v2.3U.G0195000/AeUmb.PI554389.v2.6U.G0763700/AeUmb.PI554389.v2.5U.G0212100/AeUmb.PI554389.v2.7U.G0654500/AeUmb.PI5…	212	0.609195
CC	GO:1902494	catalytic complex	109	0.429018	1.52667	2.58307e-05	0.000625472	0.000407853	3314	tags=76%, list=47%, signal=41%	AeUmb.PI554389.v2.4U.G0914600/AeUmb.PI554389.v2.4U.G0160900/AeUmb.PI554389.v2.5U.G0353800/AeUmb.PI554389.v2.6U.G0402300/AeUmb.PI554389.v2.2U.G0630400/AeUmb.PI554389.v2.2U.G0100400/AeUmb.PI554389.v2.7U.G0273700/AeUmb.PI554389.v2.3U.G0195000/AeUmb.PI554389.v2.5U.G0212100/AeUmb.PI554389.v2.2U.G0463900/AeUmb.PI554389.v2.2U.G0057300/AeUmb.PI554389.v2.3U.G0224900/AeUmb.PI554389.v2.5U.G0926100/AeUmb.PI5…	83	0.761468
BP	GO:0055086	nucleobase-containing small molecule metabolic process	58	0.483321	1.63443	6.03519e-05	0.00141099	0.000920066	2882	tags=76%, list=41%, signal=45%	AeUmb.PI554389.v2.6U.G0611800/AeUmb.PI554389.v2.5U.G0605400/AeUmb.PI554389.v2.7U.G0273700/AeUmb.PI554389.v2.7U.G0808300/AeUmb.PI554389.v2.7U.G0926800/AeUmb.PI554389.v2.5U.G0393900/AeUmb.PI554389.v2.2U.G0170900/AeUmb.PI554389.v2.1U.G0223100/AeUmb.PI554389.v2.5U.G0607900/AeUmb.PI554389.v2.4U.G0915500/AeUmb.PI554389.v2.4U.G1018300/AeUmb.PI554389.v2.1U.G0533700/AeUmb.PI554389.v2.3U.G0253900/AeUmb.PI5…	44	0.758621
MF	GO:0045182	translation regulator activity	19	0.652232	1.91482	6.92663e-05	0.00156542	0.00102077	2198	tags=89%, list=31%, signal=62%	AeUmb.PI554389.v2.6U.G0326600/AeUmb.PI554389.v2.2U.G0228500/AeUmb.PI554389.v2.7U.G0081800/AeUmb.PI554389.v2.4U.G0657800/AeUmb.PI554389.v2.5U.G0747800/AeUmb.PI554389.v2.4U.G0689600/AeUmb.PI554389.v2.2U.G0207500/AeUmb.PI554389.v2.6U.G0678600/AeUmb.PI554389.v2.2U.G0144700/AeUmb.PI554389.v2.6U.G0460500/AeUmb.PI554389.v2.4U.G0742500/AeUmb.PI554389.v2.5U.G0706300/AeUmb.PI554389.v2.5U.G0961100/AeUmb.PI5…	17	0.894737
BP	GO:0044255	cellular lipid metabolic process	65	0.475367	1.62513	9.75775e-05	0.00213411	0.0013916	3093	tags=75%, list=44%, signal=43%	AeUmb.PI554389.v2.2U.G0138100/AeUmb.PI554389.v2.3U.G0383600/AeUmb.PI554389.v2.7U.G1073900/AeUmb.PI554389.v2.7U.G0205000/AeUmb.PI554389.v2.6U.G0373100/AeUmb.PI554389.v2.5U.G0913900/AeUmb.PI554389.v2.2U.G0571600/AeUmb.PI554389.v2.5U.G0268200/AeUmb.PI554389.v2.6U.G0473800/AeUmb.PI554389.v2.3U.G0179600/AeUmb.PI554389.v2.1U.G0167100/AeUmb.PI554389.v2.6U.G0222800/AeUmb.PI554389.v2.3U.G0401200/AeUmb.PI5…	49	0.753846
BP	GO:0009888	tissue development	22	-0.475953	-2.15441	0.00010924	0.00224439	0.0014635	2863	tags=95%, list=40%, signal=57%	AeUmb.PI554389.v2.5U.G0400400/AeUmb.PI554389.v2.3U.G0470200/AeUmb.PI554389.v2.6U.G0170600/AeUmb.PI554389.v2.2U.G0146900/AeUmb.PI554389.v2.5U.G0103300/AeUmb.PI554389.v2.7U.G0872500/AeUmb.PI554389.v2.4U.G0072000/AeUmb.PI554389.v2.6U.G0671700/AeUmb.PI554389.v2.5U.G0388600/AeUmb.PI554389.v2.3U.G0289600/AeUmb.PI554389.v2.6U.G0782200/AeUmb.PI554389.v2.6U.G0115400/AeUmb.PI554389.v2.3U.G0329400/AeUmb.PI5…	21	0.954545
BP	GO:0051604	protein maturation	47	0.504804	1.67092	0.000107784	0.00224439	0.0014635	3114	tags=85%, list=44%, signal=48%	AeUmb.PI554389.v2.2U.G0630400/AeUmb.PI554389.v2.7U.G0278000/AeUmb.PI554389.v2.6U.G0578300/AeUmb.PI554389.v2.6U.G0473900/AeUmb.PI554389.v2.2U.G0184100/AeUmb.PI554389.v2.7U.G0758000/AeUmb.PI554389.v2.4U.G0401600/AeUmb.PI554389.v2.1U.G0387700/AeUmb.PI554389.v2.5U.G0176700/AeUmb.PI554389.v2.2U.G0824800/AeUmb.PI554389.v2.7U.G0176700/AeUmb.PI554389.v2.5U.G0686200/AeUmb.PI554389.v2.4U.G0660800/AeUmb.PI5…	40	0.851064
BP	GO:0006396	RNA processing	118	0.41044	1.46879	0.000116765	0.00232844	0.00151831	2764	tags=67%, list=39%, signal=42%	AeUmb.PI554389.v2.1U.G0269200/AeUmb.PI554389.v2.2U.G0785400/AeUmb.PI554389.v2.4U.G0586300/AeUmb.PI554389.v2.4U.G0131200/AeUmb.PI554389.v2.2U.G0164500/AeUmb.PI554389.v2.2U.G0276900/AeUmb.PI554389.v2.6U.G0181400/AeUmb.PI554389.v2.5U.G0718400/AeUmb.PI554389.v2.2U.G0111200/AeUmb.PI554389.v2.2U.G0069900/AeUmb.PI554389.v2.3U.G0400600/AeUmb.PI554389.v2.7U.G0066800/AeUmb.PI554389.v2.6U.G0176500/AeUmb.PI5…	79	0.669492
MF	GO:0008135	translation factor activity, RNA binding	18	0.650106	1.89114	0.000132691	0.00249901	0.00162953	2198	tags=89%, list=31%, signal=61%	AeUmb.PI554389.v2.6U.G0326600/AeUmb.PI554389.v2.2U.G0228500/AeUmb.PI554389.v2.7U.G0081800/AeUmb.PI554389.v2.4U.G0657800/AeUmb.PI554389.v2.5U.G0747800/AeUmb.PI554389.v2.4U.G0689600/AeUmb.PI554389.v2.2U.G0207500/AeUmb.PI554389.v2.6U.G0678600/AeUmb.PI554389.v2.2U.G0144700/AeUmb.PI554389.v2.6U.G0460500/AeUmb.PI554389.v2.4U.G0742500/AeUmb.PI554389.v2.5U.G0706300/AeUmb.PI554389.v2.5U.G0961100/AeUmb.PI5…	16	0.888889
MF	GO:0090079	translation regulator activity, nucleic acid binding	18	0.650106	1.89114	0.000132691	0.00249901	0.00162953	2198	tags=89%, list=31%, signal=61%	AeUmb.PI554389.v2.6U.G0326600/AeUmb.PI554389.v2.2U.G0228500/AeUmb.PI554389.v2.7U.G0081800/AeUmb.PI554389.v2.4U.G0657800/AeUmb.PI554389.v2.5U.G0747800/AeUmb.PI554389.v2.4U.G0689600/AeUmb.PI554389.v2.2U.G0207500/AeUmb.PI554389.v2.6U.G0678600/AeUmb.PI554389.v2.2U.G0144700/AeUmb.PI554389.v2.6U.G0460500/AeUmb.PI554389.v2.4U.G0742500/AeUmb.PI554389.v2.5U.G0706300/AeUmb.PI554389.v2.5U.G0961100/AeUmb.PI5…	16	0.888889
CC	GO:0019866	organelle inner membrane	20	0.615065	1.8225	0.000143353	0.00262685	0.0017129	2320	tags=90%, list=33%, signal=61%	AeUmb.PI554389.v2.5U.G0353800/AeUmb.PI554389.v2.7U.G0840300/AeUmb.PI554389.v2.6U.G0471000/AeUmb.PI554389.v2.6U.G0188600/AeUmb.PI554389.v2.5U.G0180100/AeUmb.PI554389.v2.5U.G0926500/AeUmb.PI554389.v2.7U.G0988100/AeUmb.PI554389.v2.5U.G0237400/AeUmb.PI554389.v2.5U.G0692000/AeUmb.PI554389.v2.7U.G1004300/AeUmb.PI554389.v2.4U.G0374900/AeUmb.PI554389.v2.2U.G0030200/AeUmb.PI554389.v2.1U.G0299400/AeUmb.PI5…	18	0.9
MF	GO:0004866	endopeptidase inhibitor activity	13	-0.591565	-2.23098	0.000183491	0.00289319	0.00188657	2900	tags=100%, list=41%, signal=59%	AeUmb.PI554389.v2.1U.G0528900/AeUmb.PI554389.v2.7U.G0021000/AeUmb.PI554389.v2.7U.G0527600/AeUmb.PI554389.v2.2U.G0277700/AeUmb.PI554389.v2.2U.G0048200/AeUmb.PI554389.v2.5U.G0837200/AeUmb.PI554389.v2.5U.G0792700/AeUmb.PI554389.v2.7U.G1000400/AeUmb.PI554389.v2.2U.G0369100/AeUmb.PI554389.v2.3U.G0472500/AeUmb.PI554389.v2.2U.G0837800/AeUmb.PI554389.v2.5U.G0517100	12	0.923077
MF	GO:0030414	peptidase inhibitor activity	13	-0.591565	-2.23098	0.000183491	0.00289319	0.00188657	2900	tags=100%, list=41%, signal=59%	AeUmb.PI554389.v2.1U.G0528900/AeUmb.PI554389.v2.7U.G0021000/AeUmb.PI554389.v2.7U.G0527600/AeUmb.PI554389.v2.2U.G0277700/AeUmb.PI554389.v2.2U.G0048200/AeUmb.PI554389.v2.5U.G0837200/AeUmb.PI554389.v2.5U.G0792700/AeUmb.PI554389.v2.7U.G1000400/AeUmb.PI554389.v2.2U.G0369100/AeUmb.PI554389.v2.3U.G0472500/AeUmb.PI554389.v2.2U.G0837800/AeUmb.PI554389.v2.5U.G0517100	12	0.923077
MF	GO:0061134	peptidase regulator activity	13	-0.591565	-2.23098	0.000183491	0.00289319	0.00188657	2900	tags=100%, list=41%, signal=59%	AeUmb.PI554389.v2.1U.G0528900/AeUmb.PI554389.v2.7U.G0021000/AeUmb.PI554389.v2.7U.G0527600/AeUmb.PI554389.v2.2U.G0277700/AeUmb.PI554389.v2.2U.G0048200/AeUmb.PI554389.v2.5U.G0837200/AeUmb.PI554389.v2.5U.G0792700/AeUmb.PI554389.v2.7U.G1000400/AeUmb.PI554389.v2.2U.G0369100/AeUmb.PI554389.v2.3U.G0472500/AeUmb.PI554389.v2.2U.G0837800/AeUmb.PI554389.v2.5U.G0517100	12	0.923077
MF	GO:0061135	endopeptidase regulator activity	13	-0.591565	-2.23098	0.000183491	0.00289319	0.00188657	2900	tags=100%, list=41%, signal=59%	AeUmb.PI554389.v2.1U.G0528900/AeUmb.PI554389.v2.7U.G0021000/AeUmb.PI554389.v2.7U.G0527600/AeUmb.PI554389.v2.2U.G0277700/AeUmb.PI554389.v2.2U.G0048200/AeUmb.PI554389.v2.5U.G0837200/AeUmb.PI554389.v2.5U.G0792700/AeUmb.PI554389.v2.7U.G1000400/AeUmb.PI554389.v2.2U.G0369100/AeUmb.PI554389.v2.3U.G0472500/AeUmb.PI554389.v2.2U.G0837800/AeUmb.PI554389.v2.5U.G0517100	12	0.923077
CC	GO:1990904	ribonucleoprotein complex	49	0.491641	1.63476	0.000173516	0.00289319	0.00188657	1677	tags=57%, list=24%, signal=44%	AeUmb.PI554389.v2.4U.G0131200/AeUmb.PI554389.v2.2U.G0111200/AeUmb.PI554389.v2.2U.G0069900/AeUmb.PI554389.v2.4U.G0950700/AeUmb.PI554389.v2.7U.G0113100/AeUmb.PI554389.v2.6U.G0142700/AeUmb.PI554389.v2.5U.G0673700/AeUmb.PI554389.v2.2U.G0569000/AeUmb.PI554389.v2.2U.G0340000/AeUmb.PI554389.v2.6U.G0426800/AeUmb.PI554389.v2.7U.G0838200/AeUmb.PI554389.v2.7U.G0906600/AeUmb.PI554389.v2.4U.G0125400/AeUmb.PI5…	28	0.571429
BP	GO:0019637	organophosphate metabolic process	84	0.44621	1.55799	0.000173446	0.00289319	0.00188657	3093	tags=74%, list=44%, signal=42%	AeUmb.PI554389.v2.6U.G0611800/AeUmb.PI554389.v2.7U.G0273700/AeUmb.PI554389.v2.7U.G0926800/AeUmb.PI554389.v2.5U.G0393900/AeUmb.PI554389.v2.3U.G0383600/AeUmb.PI554389.v2.2U.G0170900/AeUmb.PI554389.v2.1U.G0223100/AeUmb.PI554389.v2.5U.G0607900/AeUmb.PI554389.v2.4U.G0915500/AeUmb.PI554389.v2.7U.G0205000/AeUmb.PI554389.v2.6U.G0373100/AeUmb.PI554389.v2.1U.G0533700/AeUmb.PI554389.v2.5U.G0913900/AeUmb.PI5…	62	0.738095
BP	GO:0006520	amino acid metabolic process	72	0.453436	1.5632	0.000200653	0.00309188	0.00201613	2449	tags=57%, list=35%, signal=38%	AeUmb.PI554389.v2.5U.G0304100/AeUmb.PI554389.v2.4U.G0487000/AeUmb.PI554389.v2.7U.G0808300/AeUmb.PI554389.v2.6U.G0380900/AeUmb.PI554389.v2.4U.G0063100/AeUmb.PI554389.v2.2U.G0631400/AeUmb.PI554389.v2.4U.G0171200/AeUmb.PI554389.v2.2U.G0403600/AeUmb.PI554389.v2.7U.G0900500/AeUmb.PI554389.v2.5U.G0371000/AeUmb.PI554389.v2.4U.G0145500/AeUmb.PI554389.v2.4U.G0872900/AeUmb.PI554389.v2.5U.G0511900/AeUmb.PI5…	41	0.569444
BP	GO:0072521	purine-containing compound metabolic process	44	0.501341	1.64792	0.000214407	0.00323039	0.00210645	2882	tags=80%, list=41%, signal=47%	AeUmb.PI554389.v2.6U.G0611800/AeUmb.PI554389.v2.7U.G0273700/AeUmb.PI554389.v2.7U.G0926800/AeUmb.PI554389.v2.5U.G0393900/AeUmb.PI554389.v2.2U.G0170900/AeUmb.PI554389.v2.1U.G0223100/AeUmb.PI554389.v2.5U.G0607900/AeUmb.PI554389.v2.4U.G0915500/AeUmb.PI554389.v2.1U.G0533700/AeUmb.PI554389.v2.5U.G0206200/AeUmb.PI554389.v2.3U.G0407300/AeUmb.PI554389.v2.4U.G0929100/AeUmb.PI554389.v2.7U.G0414800/AeUmb.PI5…	35	0.795455
MF	GO:0016874	ligase activity	39	0.515816	1.67271	0.000317024	0.00467266	0.00304692	2401	tags=69%, list=34%, signal=46%	AeUmb.PI554389.v2.1U.G0325500/AeUmb.PI554389.v2.2U.G0631400/AeUmb.PI554389.v2.1U.G0167500/AeUmb.PI554389.v2.7U.G0900500/AeUmb.PI554389.v2.5U.G0371000/AeUmb.PI554389.v2.4U.G0145500/AeUmb.PI554389.v2.7U.G0602200/AeUmb.PI554389.v2.6U.G0567200/AeUmb.PI554389.v2.5U.G0256700/AeUmb.PI554389.v2.3U.G0132000/AeUmb.PI554389.v2.6U.G0379800/AeUmb.PI554389.v2.4U.G0030900/AeUmb.PI554389.v2.7U.G0116700/AeUmb.PI5…	27	0.692308
BP	GO:0032787	monocarboxylic acid metabolic process	30	0.540177	1.69737	0.000353905	0.00510527	0.00332901	2921	tags=83%, list=41%, signal=49%	AeUmb.PI554389.v2.6U.G0611800/AeUmb.PI554389.v2.7U.G0926800/AeUmb.PI554389.v2.5U.G0393900/AeUmb.PI554389.v2.2U.G0170900/AeUmb.PI554389.v2.6U.G0324900/AeUmb.PI554389.v2.1U.G0533700/AeUmb.PI554389.v2.7U.G0121200/AeUmb.PI554389.v2.5U.G0206200/AeUmb.PI554389.v2.4U.G0929100/AeUmb.PI554389.v2.6U.G0222800/AeUmb.PI554389.v2.6U.G0379800/AeUmb.PI554389.v2.5U.G0192300/AeUmb.PI554389.v2.1U.G0270500/AeUmb.PI5…	25	0.833333
CC	GO:0043228	non-membrane-bounded organelle	291	0.344441	1.29088	0.000403288	0.00558019	0.00363869	3454	tags=62%, list=49%, signal=33%	AeUmb.PI554389.v2.4U.G0160900/AeUmb.PI554389.v2.6U.G0402300/AeUmb.PI554389.v2.3U.G0291500/AeUmb.PI554389.v2.6U.G0016400/AeUmb.PI554389.v2.6U.G0763700/AeUmb.PI554389.v2.5U.G0212100/AeUmb.PI554389.v2.4U.G0644300/AeUmb.PI554389.v2.4U.G0028600/AeUmb.PI554389.v2.3U.G0204600/AeUmb.PI554389.v2.4U.G0950700/AeUmb.PI554389.v2.5U.G0660200/AeUmb.PI554389.v2.3U.G0390700/AeUmb.PI554389.v2.3U.G0246900/AeUmb.PI5…	180	0.618557
CC	GO:0043232	intracellular non-membrane-bounded organelle	291	0.344441	1.29088	0.000403288	0.00558019	0.00363869	3454	tags=62%, list=49%, signal=33%	AeUmb.PI554389.v2.4U.G0160900/AeUmb.PI554389.v2.6U.G0402300/AeUmb.PI554389.v2.3U.G0291500/AeUmb.PI554389.v2.6U.G0016400/AeUmb.PI554389.v2.6U.G0763700/AeUmb.PI554389.v2.5U.G0212100/AeUmb.PI554389.v2.4U.G0644300/AeUmb.PI554389.v2.4U.G0028600/AeUmb.PI554389.v2.3U.G0204600/AeUmb.PI554389.v2.4U.G0950700/AeUmb.PI554389.v2.5U.G0660200/AeUmb.PI554389.v2.3U.G0390700/AeUmb.PI554389.v2.3U.G0246900/AeUmb.PI5…	180	0.618557
CC	GO:0005743	mitochondrial inner membrane	19	0.611376	1.79487	0.000478723	0.00649148	0.00423292	2320	tags=89%, list=33%, signal=60%	AeUmb.PI554389.v2.5U.G0353800/AeUmb.PI554389.v2.7U.G0840300/AeUmb.PI554389.v2.6U.G0471000/AeUmb.PI554389.v2.6U.G0188600/AeUmb.PI554389.v2.5U.G0180100/AeUmb.PI554389.v2.7U.G0988100/AeUmb.PI554389.v2.5U.G0237400/AeUmb.PI554389.v2.5U.G0692000/AeUmb.PI554389.v2.7U.G1004300/AeUmb.PI554389.v2.4U.G0374900/AeUmb.PI554389.v2.2U.G0030200/AeUmb.PI554389.v2.1U.G0299400/AeUmb.PI554389.v2.7U.G0143200/AeUmb.PI5…	17	0.894737
CC	GO:0031966	mitochondrial membrane	24	0.572521	1.74363	0.000501418	0.00666591	0.00434666	2320	tags=83%, list=33%, signal=56%	AeUmb.PI554389.v2.5U.G0353800/AeUmb.PI554389.v2.7U.G0840300/AeUmb.PI554389.v2.5U.G0335400/AeUmb.PI554389.v2.5U.G0855500/AeUmb.PI554389.v2.6U.G0471000/AeUmb.PI554389.v2.6U.G0188600/AeUmb.PI554389.v2.5U.G0180100/AeUmb.PI554389.v2.7U.G0988100/AeUmb.PI554389.v2.5U.G0237400/AeUmb.PI554389.v2.5U.G0692000/AeUmb.PI554389.v2.7U.G1004300/AeUmb.PI554389.v2.4U.G0374900/AeUmb.PI554389.v2.7U.G0163000/AeUmb.PI5…	20	0.833333
CC	GO:0005739	mitochondrion	37	0.507419	1.63653	0.000582231	0.00744816	0.00485674	2648	tags=76%, list=37%, signal=48%	AeUmb.PI554389.v2.5U.G0353800/AeUmb.PI554389.v2.7U.G0840300/AeUmb.PI554389.v2.5U.G0335400/AeUmb.PI554389.v2.2U.G0057300/AeUmb.PI554389.v2.5U.G0855500/AeUmb.PI554389.v2.6U.G0471000/AeUmb.PI554389.v2.5U.G0913900/AeUmb.PI554389.v2.6U.G0188600/AeUmb.PI554389.v2.5U.G0180100/AeUmb.PI554389.v2.5U.G0840200/AeUmb.PI554389.v2.7U.G0988100/AeUmb.PI554389.v2.5U.G0237400/AeUmb.PI554389.v2.5U.G0692000/AeUmb.PI5…	28	0.756757
MF	GO:0016788	hydrolase activity, acting on ester bonds	166	0.375351	1.37027	0.00058159	0.00744816	0.00485674	2858	tags=61%, list=40%, signal=37%	AeUmb.PI554389.v2.2U.G0785400/AeUmb.PI554389.v2.7U.G0048700/AeUmb.PI554389.v2.3U.G0409800/AeUmb.PI554389.v2.5U.G0304100/AeUmb.PI554389.v2.1U.G0394300/AeUmb.PI554389.v2.3U.G0430300/AeUmb.PI554389.v2.5U.G0457800/AeUmb.PI554389.v2.7U.G0583300/AeUmb.PI554389.v2.6U.G0324900/AeUmb.PI554389.v2.3U.G0361900/AeUmb.PI554389.v2.7U.G0205000/AeUmb.PI554389.v2.6U.G0104600/AeUmb.PI554389.v2.6U.G0694800/AeUmb.PI5…	101	0.608434
CC	GO:0031967	organelle envelope	39	0.502888	1.63079	0.000609676	0.00746257	0.00486614	2320	tags=72%, list=33%, signal=49%	AeUmb.PI554389.v2.5U.G0353800/AeUmb.PI554389.v2.7U.G0840300/AeUmb.PI554389.v2.6U.G0016400/AeUmb.PI554389.v2.5U.G0335400/AeUmb.PI554389.v2.5U.G0855500/AeUmb.PI554389.v2.6U.G0471000/AeUmb.PI554389.v2.6U.G0188600/AeUmb.PI554389.v2.5U.G0180100/AeUmb.PI554389.v2.5U.G0926500/AeUmb.PI554389.v2.5U.G0319600/AeUmb.PI554389.v2.7U.G0988100/AeUmb.PI554389.v2.5U.G0237400/AeUmb.PI554389.v2.5U.G0692000/AeUmb.PI5…	28	0.717949
CC	GO:0031975	envelope	39	0.502888	1.63079	0.000609676	0.00746257	0.00486614	2320	tags=72%, list=33%, signal=49%	AeUmb.PI554389.v2.5U.G0353800/AeUmb.PI554389.v2.7U.G0840300/AeUmb.PI554389.v2.6U.G0016400/AeUmb.PI554389.v2.5U.G0335400/AeUmb.PI554389.v2.5U.G0855500/AeUmb.PI554389.v2.6U.G0471000/AeUmb.PI554389.v2.6U.G0188600/AeUmb.PI554389.v2.5U.G0180100/AeUmb.PI554389.v2.5U.G0926500/AeUmb.PI554389.v2.5U.G0319600/AeUmb.PI554389.v2.7U.G0988100/AeUmb.PI554389.v2.5U.G0237400/AeUmb.PI554389.v2.5U.G0692000/AeUmb.PI5…	28	0.717949
BP	GO:0006811	monoatomic ion transport	70	0.438965	1.50994	0.000618225	0.00746257	0.00486614	2225	tags=56%, list=31%, signal=39%	AeUmb.PI554389.v2.5U.G0618600/AeUmb.PI554389.v2.7U.G0273700/AeUmb.PI554389.v2.6U.G0629300/AeUmb.PI554389.v2.6U.G0421700/AeUmb.PI554389.v2.3U.G0195000/AeUmb.PI554389.v2.7U.G0442800/AeUmb.PI554389.v2.1U.G0460500/AeUmb.PI554389.v2.2U.G0463900/AeUmb.PI554389.v2.5U.G0335400/AeUmb.PI554389.v2.3U.G0224900/AeUmb.PI554389.v2.6U.G0017900/AeUmb.PI554389.v2.1U.G0226300/AeUmb.PI554389.v2.4U.G0918000/AeUmb.PI5…	39	0.557143
BP	GO:0022607	cellular component assembly	73	0.431357	1.48881	0.000627384	0.00746257	0.00486614	2642	tags=62%, list=37%, signal=39%	AeUmb.PI554389.v2.4U.G0131200/AeUmb.PI554389.v2.7U.G0081800/AeUmb.PI554389.v2.2U.G0108900/AeUmb.PI554389.v2.4U.G0644300/AeUmb.PI554389.v2.4U.G0912600/AeUmb.PI554389.v2.2U.G0069900/AeUmb.PI554389.v2.5U.G0253800/AeUmb.PI554389.v2.6U.G0716000/AeUmb.PI554389.v2.5U.G0390300/AeUmb.PI554389.v2.5U.G0370400/AeUmb.PI554389.v2.3U.G0246900/AeUmb.PI554389.v2.6U.G0311400/AeUmb.PI554389.v2.2U.G0024300/AeUmb.PI5…	45	0.616438
MF	GO:0016791	phosphatase activity	84	0.426126	1.48787	0.000764765	0.00893984	0.00582942	3021	tags=74%, list=43%, signal=43%	AeUmb.PI554389.v2.2U.G0785400/AeUmb.PI554389.v2.7U.G0048700/AeUmb.PI554389.v2.3U.G0409800/AeUmb.PI554389.v2.1U.G0394300/AeUmb.PI554389.v2.5U.G0457800/AeUmb.PI554389.v2.7U.G0583300/AeUmb.PI554389.v2.3U.G0361900/AeUmb.PI554389.v2.7U.G0205000/AeUmb.PI554389.v2.6U.G0104600/AeUmb.PI554389.v2.6U.G0373100/AeUmb.PI554389.v2.6U.G0052600/AeUmb.PI554389.v2.3U.G0208100/AeUmb.PI554389.v2.3U.G0325900/AeUmb.PI5…	62	0.738095
MF	GO:0022853	active monoatomic ion transmembrane transporter activity	18	0.605505	1.7614	0.000843639	0.00953312	0.00621628	2191	tags=72%, list=31%, signal=50%	AeUmb.PI554389.v2.7U.G0273700/AeUmb.PI554389.v2.3U.G0195000/AeUmb.PI554389.v2.2U.G0463900/AeUmb.PI554389.v2.6U.G0460100/AeUmb.PI554389.v2.3U.G0224900/AeUmb.PI554389.v2.7U.G0070300/AeUmb.PI554389.v2.6U.G0149900/AeUmb.PI554389.v2.6U.G0381100/AeUmb.PI554389.v2.5U.G0398700/AeUmb.PI554389.v2.7U.G0468200/AeUmb.PI554389.v2.3U.G0160300/AeUmb.PI554389.v2.5U.G0920300/AeUmb.PI554389.v2.7U.G0735600	13	0.722222
BP	GO:0009199	ribonucleoside triphosphate metabolic process	24	0.561948	1.71142	0.000832623	0.00953312	0.00621628	2320	tags=75%, list=33%, signal=51%	AeUmb.PI554389.v2.7U.G0273700/AeUmb.PI554389.v2.7U.G0926800/AeUmb.PI554389.v2.5U.G0393900/AeUmb.PI554389.v2.2U.G0170900/AeUmb.PI554389.v2.1U.G0533700/AeUmb.PI554389.v2.5U.G0206200/AeUmb.PI554389.v2.4U.G0929100/AeUmb.PI554389.v2.4U.G0030900/AeUmb.PI554389.v2.4U.G0063600/AeUmb.PI554389.v2.1U.G0270500/AeUmb.PI554389.v2.1U.G0391100/AeUmb.PI554389.v2.2U.G0152300/AeUmb.PI554389.v2.3U.G0601600/AeUmb.PI5…	18	0.75
MF	GO:0019829	ATPase-coupled monoatomic cation transmembrane transporter activity	12	0.665648	1.78609	0.00090705	0.0100657	0.00656358	2191	tags=92%, list=31%, signal=63%	AeUmb.PI554389.v2.7U.G0273700/AeUmb.PI554389.v2.3U.G0195000/AeUmb.PI554389.v2.2U.G0463900/AeUmb.PI554389.v2.3U.G0224900/AeUmb.PI554389.v2.7U.G0070300/AeUmb.PI554389.v2.6U.G0149900/AeUmb.PI554389.v2.6U.G0381100/AeUmb.PI554389.v2.5U.G0398700/AeUmb.PI554389.v2.7U.G0468200/AeUmb.PI554389.v2.5U.G0920300/AeUmb.PI554389.v2.7U.G0735600	11	0.916667
BP	GO:1901135	carbohydrate derivative metabolic process	73	0.426951	1.4736	0.000920464	0.0100657	0.00656358	2886	tags=66%, list=41%, signal=39%	AeUmb.PI554389.v2.6U.G0611800/AeUmb.PI554389.v2.5U.G0605400/AeUmb.PI554389.v2.7U.G0273700/AeUmb.PI554389.v2.7U.G0808300/AeUmb.PI554389.v2.7U.G0926800/AeUmb.PI554389.v2.5U.G0393900/AeUmb.PI554389.v2.2U.G0170900/AeUmb.PI554389.v2.1U.G0223100/AeUmb.PI554389.v2.4U.G1018300/AeUmb.PI554389.v2.5U.G0230400/AeUmb.PI554389.v2.3U.G0616400/AeUmb.PI554389.v2.1U.G0533700/AeUmb.PI554389.v2.5U.G0206200/AeUmb.PI5…	48	0.657534
BP	GO:0006753	nucleoside phosphate metabolic process	48	0.475485	1.5768	0.00098524	0.0104374	0.00680594	2882	tags=75%, list=41%, signal=45%	AeUmb.PI554389.v2.6U.G0611800/AeUmb.PI554389.v2.7U.G0273700/AeUmb.PI554389.v2.7U.G0926800/AeUmb.PI554389.v2.5U.G0393900/AeUmb.PI554389.v2.2U.G0170900/AeUmb.PI554389.v2.1U.G0223100/AeUmb.PI554389.v2.5U.G0607900/AeUmb.PI554389.v2.4U.G0915500/AeUmb.PI554389.v2.1U.G0533700/AeUmb.PI554389.v2.5U.G0206200/AeUmb.PI554389.v2.4U.G0929100/AeUmb.PI554389.v2.4U.G0030900/AeUmb.PI554389.v2.7U.G0414800/AeUmb.PI5…	36	0.75
BP	GO:0009117	nucleotide metabolic process	48	0.475485	1.5768	0.00098524	0.0104374	0.00680594	2882	tags=75%, list=41%, signal=45%	AeUmb.PI554389.v2.6U.G0611800/AeUmb.PI554389.v2.7U.G0273700/AeUmb.PI554389.v2.7U.G0926800/AeUmb.PI554389.v2.5U.G0393900/AeUmb.PI554389.v2.2U.G0170900/AeUmb.PI554389.v2.1U.G0223100/AeUmb.PI554389.v2.5U.G0607900/AeUmb.PI554389.v2.4U.G0915500/AeUmb.PI554389.v2.1U.G0533700/AeUmb.PI554389.v2.5U.G0206200/AeUmb.PI554389.v2.4U.G0929100/AeUmb.PI554389.v2.4U.G0030900/AeUmb.PI554389.v2.7U.G0414800/AeUmb.PI5…	36	0.75
MF	GO:0140640	catalytic activity, acting on a nucleic acid	134	0.382408	1.37889	0.00100325	0.0104647	0.00682375	2540	tags=50%, list=36%, signal=33%	AeUmb.PI554389.v2.2U.G0785400/AeUmb.PI554389.v2.5U.G0304100/AeUmb.PI554389.v2.3U.G0430300/AeUmb.PI554389.v2.7U.G1029900/AeUmb.PI554389.v2.5U.G0313500/AeUmb.PI554389.v2.2U.G0631400/AeUmb.PI554389.v2.6U.G0694800/AeUmb.PI554389.v2.7U.G0876200/AeUmb.PI554389.v2.7U.G0900500/AeUmb.PI554389.v2.5U.G0371000/AeUmb.PI554389.v2.4U.G0145500/AeUmb.PI554389.v2.6U.G0176500/AeUmb.PI554389.v2.4U.G0236700/AeUmb.PI5…	67	0.5
BP	GO:0006163	purine nucleotide metabolic process	41	0.492984	1.60796	0.00104101	0.010694	0.00697325	2882	tags=78%, list=41%, signal=47%	AeUmb.PI554389.v2.6U.G0611800/AeUmb.PI554389.v2.7U.G0273700/AeUmb.PI554389.v2.7U.G0926800/AeUmb.PI554389.v2.5U.G0393900/AeUmb.PI554389.v2.2U.G0170900/AeUmb.PI554389.v2.1U.G0223100/AeUmb.PI554389.v2.5U.G0607900/AeUmb.PI554389.v2.4U.G0915500/AeUmb.PI554389.v2.1U.G0533700/AeUmb.PI554389.v2.5U.G0206200/AeUmb.PI554389.v2.4U.G0929100/AeUmb.PI554389.v2.7U.G0414800/AeUmb.PI554389.v2.1U.G0270500/AeUmb.PI5…	32	0.780488
BP	GO:0043933	protein-containing complex organization	78	0.419204	1.45517	0.00137141	0.0138779	0.00904938	2764	tags=62%, list=39%, signal=38%	AeUmb.PI554389.v2.4U.G0160900/AeUmb.PI554389.v2.4U.G0131200/AeUmb.PI554389.v2.7U.G0081800/AeUmb.PI554389.v2.2U.G0069900/AeUmb.PI554389.v2.5U.G0253800/AeUmb.PI554389.v2.6U.G0716000/AeUmb.PI554389.v2.2U.G0207500/AeUmb.PI554389.v2.5U.G0390300/AeUmb.PI554389.v2.5U.G0370400/AeUmb.PI554389.v2.3U.G0246900/AeUmb.PI554389.v2.5U.G0707800/AeUmb.PI554389.v2.5U.G0915300/AeUmb.PI554389.v2.2U.G0024300/AeUmb.PI5…	48	0.615385
BP	GO:0006096	glycolytic process	13	0.640987	1.74944	0.00208073	0.0157962	0.0103003	2204	tags=85%, list=31%, signal=58%	AeUmb.PI554389.v2.7U.G0926800/AeUmb.PI554389.v2.5U.G0393900/AeUmb.PI554389.v2.2U.G0170900/AeUmb.PI554389.v2.1U.G0533700/AeUmb.PI554389.v2.5U.G0206200/AeUmb.PI554389.v2.4U.G0929100/AeUmb.PI554389.v2.1U.G0270500/AeUmb.PI554389.v2.3U.G0601600/AeUmb.PI554389.v2.5U.G0186900/AeUmb.PI554389.v2.7U.G0303200/AeUmb.PI554389.v2.4U.G0248600	11	0.846154
BP	GO:0006195	purine nucleotide catabolic process	13	0.640987	1.74944	0.00208073	0.0157962	0.0103003	2204	tags=85%, list=31%, signal=58%	AeUmb.PI554389.v2.7U.G0926800/AeUmb.PI554389.v2.5U.G0393900/AeUmb.PI554389.v2.2U.G0170900/AeUmb.PI554389.v2.1U.G0533700/AeUmb.PI554389.v2.5U.G0206200/AeUmb.PI554389.v2.4U.G0929100/AeUmb.PI554389.v2.1U.G0270500/AeUmb.PI554389.v2.3U.G0601600/AeUmb.PI554389.v2.5U.G0186900/AeUmb.PI554389.v2.7U.G0303200/AeUmb.PI554389.v2.4U.G0248600	11	0.846154
BP	GO:0009132	nucleoside diphosphate metabolic process	13	0.640987	1.74944	0.00208073	0.0157962	0.0103003	2204	tags=85%, list=31%, signal=58%	AeUmb.PI554389.v2.7U.G0926800/AeUmb.PI554389.v2.5U.G0393900/AeUmb.PI554389.v2.2U.G0170900/AeUmb.PI554389.v2.1U.G0533700/AeUmb.PI554389.v2.5U.G0206200/AeUmb.PI554389.v2.4U.G0929100/AeUmb.PI554389.v2.1U.G0270500/AeUmb.PI554389.v2.3U.G0601600/AeUmb.PI554389.v2.5U.G0186900/AeUmb.PI554389.v2.7U.G0303200/AeUmb.PI554389.v2.4U.G0248600	11	0.846154
BP	GO:0009134	nucleoside diphosphate catabolic process	13	0.640987	1.74944	0.00208073	0.0157962	0.0103003	2204	tags=85%, list=31%, signal=58%	AeUmb.PI554389.v2.7U.G0926800/AeUmb.PI554389.v2.5U.G0393900/AeUmb.PI554389.v2.2U.G0170900/AeUmb.PI554389.v2.1U.G0533700/AeUmb.PI554389.v2.5U.G0206200/AeUmb.PI554389.v2.4U.G0929100/AeUmb.PI554389.v2.1U.G0270500/AeUmb.PI554389.v2.3U.G0601600/AeUmb.PI554389.v2.5U.G0186900/AeUmb.PI554389.v2.7U.G0303200/AeUmb.PI554389.v2.4U.G0248600	11	0.846154
BP	GO:0009135	purine nucleoside diphosphate metabolic process	13	0.640987	1.74944	0.00208073	0.0157962	0.0103003	2204	tags=85%, list=31%, signal=58%	AeUmb.PI554389.v2.7U.G0926800/AeUmb.PI554389.v2.5U.G0393900/AeUmb.PI554389.v2.2U.G0170900/AeUmb.PI554389.v2.1U.G0533700/AeUmb.PI554389.v2.5U.G0206200/AeUmb.PI554389.v2.4U.G0929100/AeUmb.PI554389.v2.1U.G0270500/AeUmb.PI554389.v2.3U.G0601600/AeUmb.PI554389.v2.5U.G0186900/AeUmb.PI554389.v2.7U.G0303200/AeUmb.PI554389.v2.4U.G0248600	11	0.846154
BP	GO:0009137	purine nucleoside diphosphate catabolic process	13	0.640987	1.74944	0.00208073	0.0157962	0.0103003	2204	tags=85%, list=31%, signal=58%	AeUmb.PI554389.v2.7U.G0926800/AeUmb.PI554389.v2.5U.G0393900/AeUmb.PI554389.v2.2U.G0170900/AeUmb.PI554389.v2.1U.G0533700/AeUmb.PI554389.v2.5U.G0206200/AeUmb.PI554389.v2.4U.G0929100/AeUmb.PI554389.v2.1U.G0270500/AeUmb.PI554389.v2.3U.G0601600/AeUmb.PI554389.v2.5U.G0186900/AeUmb.PI554389.v2.7U.G0303200/AeUmb.PI554389.v2.4U.G0248600	11	0.846154
BP	GO:0009154	purine ribonucleotide catabolic process	13	0.640987	1.74944	0.00208073	0.0157962	0.0103003	2204	tags=85%, list=31%, signal=58%	AeUmb.PI554389.v2.7U.G0926800/AeUmb.PI554389.v2.5U.G0393900/AeUmb.PI554389.v2.2U.G0170900/AeUmb.PI554389.v2.1U.G0533700/AeUmb.PI554389.v2.5U.G0206200/AeUmb.PI554389.v2.4U.G0929100/AeUmb.PI554389.v2.1U.G0270500/AeUmb.PI554389.v2.3U.G0601600/AeUmb.PI554389.v2.5U.G0186900/AeUmb.PI554389.v2.7U.G0303200/AeUmb.PI554389.v2.4U.G0248600	11	0.846154
BP	GO:0009179	purine ribonucleoside diphosphate metabolic process	13	0.640987	1.74944	0.00208073	0.0157962	0.0103003	2204	tags=85%, list=31%, signal=58%	AeUmb.PI554389.v2.7U.G0926800/AeUmb.PI554389.v2.5U.G0393900/AeUmb.PI554389.v2.2U.G0170900/AeUmb.PI554389.v2.1U.G0533700/AeUmb.PI554389.v2.5U.G0206200/AeUmb.PI554389.v2.4U.G0929100/AeUmb.PI554389.v2.1U.G0270500/AeUmb.PI554389.v2.3U.G0601600/AeUmb.PI554389.v2.5U.G0186900/AeUmb.PI554389.v2.7U.G0303200/AeUmb.PI554389.v2.4U.G0248600	11	0.846154
BP	GO:0009181	purine ribonucleoside diphosphate catabolic process	13	0.640987	1.74944	0.00208073	0.0157962	0.0103003	2204	tags=85%, list=31%, signal=58%	AeUmb.PI554389.v2.7U.G0926800/AeUmb.PI554389.v2.5U.G0393900/AeUmb.PI554389.v2.2U.G0170900/AeUmb.PI554389.v2.1U.G0533700/AeUmb.PI554389.v2.5U.G0206200/AeUmb.PI554389.v2.4U.G0929100/AeUmb.PI554389.v2.1U.G0270500/AeUmb.PI554389.v2.3U.G0601600/AeUmb.PI554389.v2.5U.G0186900/AeUmb.PI554389.v2.7U.G0303200/AeUmb.PI554389.v2.4U.G0248600	11	0.846154
BP	GO:0009185	ribonucleoside diphosphate metabolic process	13	0.640987	1.74944	0.00208073	0.0157962	0.0103003	2204	tags=85%, list=31%, signal=58%	AeUmb.PI554389.v2.7U.G0926800/AeUmb.PI554389.v2.5U.G0393900/AeUmb.PI554389.v2.2U.G0170900/AeUmb.PI554389.v2.1U.G0533700/AeUmb.PI554389.v2.5U.G0206200/AeUmb.PI554389.v2.4U.G0929100/AeUmb.PI554389.v2.1U.G0270500/AeUmb.PI554389.v2.3U.G0601600/AeUmb.PI554389.v2.5U.G0186900/AeUmb.PI554389.v2.7U.G0303200/AeUmb.PI554389.v2.4U.G0248600	11	0.846154
BP	GO:0009191	ribonucleoside diphosphate catabolic process	13	0.640987	1.74944	0.00208073	0.0157962	0.0103003	2204	tags=85%, list=31%, signal=58%	AeUmb.PI554389.v2.7U.G0926800/AeUmb.PI554389.v2.5U.G0393900/AeUmb.PI554389.v2.2U.G0170900/AeUmb.PI554389.v2.1U.G0533700/AeUmb.PI554389.v2.5U.G0206200/AeUmb.PI554389.v2.4U.G0929100/AeUmb.PI554389.v2.1U.G0270500/AeUmb.PI554389.v2.3U.G0601600/AeUmb.PI554389.v2.5U.G0186900/AeUmb.PI554389.v2.7U.G0303200/AeUmb.PI554389.v2.4U.G0248600	11	0.846154
BP	GO:0009261	ribonucleotide catabolic process	13	0.640987	1.74944	0.00208073	0.0157962	0.0103003	2204	tags=85%, list=31%, signal=58%	AeUmb.PI554389.v2.7U.G0926800/AeUmb.PI554389.v2.5U.G0393900/AeUmb.PI554389.v2.2U.G0170900/AeUmb.PI554389.v2.1U.G0533700/AeUmb.PI554389.v2.5U.G0206200/AeUmb.PI554389.v2.4U.G0929100/AeUmb.PI554389.v2.1U.G0270500/AeUmb.PI554389.v2.3U.G0601600/AeUmb.PI554389.v2.5U.G0186900/AeUmb.PI554389.v2.7U.G0303200/AeUmb.PI554389.v2.4U.G0248600	11	0.846154
BP	GO:0019364	pyridine nucleotide catabolic process	13	0.640987	1.74944	0.00208073	0.0157962	0.0103003	2204	tags=85%, list=31%, signal=58%	AeUmb.PI554389.v2.7U.G0926800/AeUmb.PI554389.v2.5U.G0393900/AeUmb.PI554389.v2.2U.G0170900/AeUmb.PI554389.v2.1U.G0533700/AeUmb.PI554389.v2.5U.G0206200/AeUmb.PI554389.v2.4U.G0929100/AeUmb.PI554389.v2.1U.G0270500/AeUmb.PI554389.v2.3U.G0601600/AeUmb.PI554389.v2.5U.G0186900/AeUmb.PI554389.v2.7U.G0303200/AeUmb.PI554389.v2.4U.G0248600	11	0.846154
BP	GO:0046031	ADP metabolic process	13	0.640987	1.74944	0.00208073	0.0157962	0.0103003	2204	tags=85%, list=31%, signal=58%	AeUmb.PI554389.v2.7U.G0926800/AeUmb.PI554389.v2.5U.G0393900/AeUmb.PI554389.v2.2U.G0170900/AeUmb.PI554389.v2.1U.G0533700/AeUmb.PI554389.v2.5U.G0206200/AeUmb.PI554389.v2.4U.G0929100/AeUmb.PI554389.v2.1U.G0270500/AeUmb.PI554389.v2.3U.G0601600/AeUmb.PI554389.v2.5U.G0186900/AeUmb.PI554389.v2.7U.G0303200/AeUmb.PI554389.v2.4U.G0248600	11	0.846154
BP	GO:0046032	ADP catabolic process	13	0.640987	1.74944	0.00208073	0.0157962	0.0103003	2204	tags=85%, list=31%, signal=58%	AeUmb.PI554389.v2.7U.G0926800/AeUmb.PI554389.v2.5U.G0393900/AeUmb.PI554389.v2.2U.G0170900/AeUmb.PI554389.v2.1U.G0533700/AeUmb.PI554389.v2.5U.G0206200/AeUmb.PI554389.v2.4U.G0929100/AeUmb.PI554389.v2.1U.G0270500/AeUmb.PI554389.v2.3U.G0601600/AeUmb.PI554389.v2.5U.G0186900/AeUmb.PI554389.v2.7U.G0303200/AeUmb.PI554389.v2.4U.G0248600	11	0.846154
BP	GO:0072523	purine-containing compound catabolic process	13	0.640987	1.74944	0.00208073	0.0157962	0.0103003	2204	tags=85%, list=31%, signal=58%	AeUmb.PI554389.v2.7U.G0926800/AeUmb.PI554389.v2.5U.G0393900/AeUmb.PI554389.v2.2U.G0170900/AeUmb.PI554389.v2.1U.G0533700/AeUmb.PI554389.v2.5U.G0206200/AeUmb.PI554389.v2.4U.G0929100/AeUmb.PI554389.v2.1U.G0270500/AeUmb.PI554389.v2.3U.G0601600/AeUmb.PI554389.v2.5U.G0186900/AeUmb.PI554389.v2.7U.G0303200/AeUmb.PI554389.v2.4U.G0248600	11	0.846154
BP	GO:0072526	pyridine-containing compound catabolic process	13	0.640987	1.74944	0.00208073	0.0157962	0.0103003	2204	tags=85%, list=31%, signal=58%	AeUmb.PI554389.v2.7U.G0926800/AeUmb.PI554389.v2.5U.G0393900/AeUmb.PI554389.v2.2U.G0170900/AeUmb.PI554389.v2.1U.G0533700/AeUmb.PI554389.v2.5U.G0206200/AeUmb.PI554389.v2.4U.G0929100/AeUmb.PI554389.v2.1U.G0270500/AeUmb.PI554389.v2.3U.G0601600/AeUmb.PI554389.v2.5U.G0186900/AeUmb.PI554389.v2.7U.G0303200/AeUmb.PI554389.v2.4U.G0248600	11	0.846154
BP	GO:0019362	pyridine nucleotide metabolic process	21	0.564355	1.6842	0.00212014	0.0157962	0.0103003	2882	tags=90%, list=41%, signal=54%	AeUmb.PI554389.v2.7U.G0926800/AeUmb.PI554389.v2.5U.G0393900/AeUmb.PI554389.v2.2U.G0170900/AeUmb.PI554389.v2.5U.G0607900/AeUmb.PI554389.v2.4U.G0915500/AeUmb.PI554389.v2.1U.G0533700/AeUmb.PI554389.v2.5U.G0206200/AeUmb.PI554389.v2.4U.G0929100/AeUmb.PI554389.v2.7U.G0414800/AeUmb.PI554389.v2.1U.G0270500/AeUmb.PI554389.v2.4U.G0652300/AeUmb.PI554389.v2.3U.G0601600/AeUmb.PI554389.v2.5U.G0481300/AeUmb.PI5…	19	0.904762
BP	GO:0046496	nicotinamide nucleotide metabolic process	21	0.564355	1.6842	0.00212014	0.0157962	0.0103003	2882	tags=90%, list=41%, signal=54%	AeUmb.PI554389.v2.7U.G0926800/AeUmb.PI554389.v2.5U.G0393900/AeUmb.PI554389.v2.2U.G0170900/AeUmb.PI554389.v2.5U.G0607900/AeUmb.PI554389.v2.4U.G0915500/AeUmb.PI554389.v2.1U.G0533700/AeUmb.PI554389.v2.5U.G0206200/AeUmb.PI554389.v2.4U.G0929100/AeUmb.PI554389.v2.7U.G0414800/AeUmb.PI554389.v2.1U.G0270500/AeUmb.PI554389.v2.4U.G0652300/AeUmb.PI554389.v2.3U.G0601600/AeUmb.PI554389.v2.5U.G0481300/AeUmb.PI5…	19	0.904762
CC	GO:1990204	oxidoreductase complex	25	0.540538	1.65623	0.00200783	0.0157962	0.0103003	3177	tags=88%, list=45%, signal=49%	AeUmb.PI554389.v2.5U.G0353800/AeUmb.PI554389.v2.6U.G0157400/AeUmb.PI554389.v2.4U.G0771900/AeUmb.PI554389.v2.5U.G0237400/AeUmb.PI554389.v2.4U.G0374900/AeUmb.PI554389.v2.2U.G0273000/AeUmb.PI554389.v2.2U.G0030200/AeUmb.PI554389.v2.7U.G0086200/AeUmb.PI554389.v2.2U.G0191900/AeUmb.PI554389.v2.5U.G0784700/AeUmb.PI554389.v2.7U.G0143200/AeUmb.PI554389.v2.1U.G0423600/AeUmb.PI554389.v2.6U.G0613200/AeUmb.PI5…	22	0.88
MF	GO:0003924	GTPase activity	32	0.521061	1.65139	0.00170307	0.0157962	0.0103003	1170	tags=53%, list=17%, signal=45%	AeUmb.PI554389.v2.4U.G0060400/AeUmb.PI554389.v2.4U.G0524900/AeUmb.PI554389.v2.6U.G0195800/AeUmb.PI554389.v2.1U.G0275500/AeUmb.PI554389.v2.1U.G0550500/AeUmb.PI554389.v2.5U.G0264100/AeUmb.PI554389.v2.6U.G0585700/AeUmb.PI554389.v2.5U.G0150000/AeUmb.PI554389.v2.2U.G0236600/AeUmb.PI554389.v2.4U.G0939600/AeUmb.PI554389.v2.1U.G0572400/AeUmb.PI554389.v2.4U.G0966800/AeUmb.PI554389.v2.1U.G0573300/AeUmb.PI5…	17	0.53125
BP	GO:0006457	protein folding	32	0.519533	1.64655	0.00180325	0.0157962	0.0103003	3114	tags=84%, list=44%, signal=47%	AeUmb.PI554389.v2.7U.G0278000/AeUmb.PI554389.v2.6U.G0473900/AeUmb.PI554389.v2.2U.G0184100/AeUmb.PI554389.v2.7U.G0758000/AeUmb.PI554389.v2.1U.G0387700/AeUmb.PI554389.v2.5U.G0176700/AeUmb.PI554389.v2.7U.G0176700/AeUmb.PI554389.v2.4U.G0660800/AeUmb.PI554389.v2.6U.G0436100/AeUmb.PI554389.v2.6U.G0727100/AeUmb.PI554389.v2.7U.G0733000/AeUmb.PI554389.v2.5U.G0508300/AeUmb.PI554389.v2.5U.G0722100/AeUmb.PI5…	27	0.84375
BP	GO:0006399	tRNA metabolic process	43	0.475684	1.55971	0.0020014	0.0157962	0.0103003	2714	tags=72%, list=38%, signal=45%	AeUmb.PI554389.v2.2U.G0631400/AeUmb.PI554389.v2.7U.G0900500/AeUmb.PI554389.v2.5U.G0371000/AeUmb.PI554389.v2.4U.G0145500/AeUmb.PI554389.v2.7U.G0602200/AeUmb.PI554389.v2.6U.G0567200/AeUmb.PI554389.v2.5U.G0256700/AeUmb.PI554389.v2.7U.G0306000/AeUmb.PI554389.v2.5U.G0694400/AeUmb.PI554389.v2.3U.G0213700/AeUmb.PI554389.v2.6U.G0197500/AeUmb.PI554389.v2.7U.G0116700/AeUmb.PI554389.v2.2U.G0120500/AeUmb.PI5…	31	0.72093
BP	GO:0044085	cellular component biogenesis	109	0.390731	1.39042	0.00209979	0.0157962	0.0103003	2642	tags=59%, list=37%, signal=37%	AeUmb.PI554389.v2.4U.G0131200/AeUmb.PI554389.v2.7U.G0081800/AeUmb.PI554389.v2.2U.G0108900/AeUmb.PI554389.v2.4U.G0644300/AeUmb.PI554389.v2.4U.G0912600/AeUmb.PI554389.v2.2U.G0069900/AeUmb.PI554389.v2.5U.G0253800/AeUmb.PI554389.v2.6U.G0716000/AeUmb.PI554389.v2.5U.G0437800/AeUmb.PI554389.v2.6U.G0176500/AeUmb.PI554389.v2.2U.G0039500/AeUmb.PI554389.v2.2U.G0212100/AeUmb.PI554389.v2.5U.G0390300/AeUmb.PI5…	64	0.587156
CC	GO:0098800	inner mitochondrial membrane protein complex	14	0.627176	1.73902	0.00217234	0.0158728	0.0103502	2648	tags=100%, list=37%, signal=63%	AeUmb.PI554389.v2.5U.G0353800/AeUmb.PI554389.v2.6U.G0188600/AeUmb.PI554389.v2.7U.G0988100/AeUmb.PI554389.v2.5U.G0237400/AeUmb.PI554389.v2.5U.G0692000/AeUmb.PI554389.v2.4U.G0374900/AeUmb.PI554389.v2.2U.G0030200/AeUmb.PI554389.v2.1U.G0299400/AeUmb.PI554389.v2.7U.G0143200/AeUmb.PI554389.v2.1U.G0423600/AeUmb.PI554389.v2.4U.G0932400/AeUmb.PI554389.v2.2U.G0229100/AeUmb.PI554389.v2.3U.G0283900/AeUmb.PI5…	14	1
BP	GO:0016053	organic acid biosynthetic process	49	0.459702	1.52855	0.00220066	0.0158728	0.0103502	2078	tags=59%, list=29%, signal=42%	AeUmb.PI554389.v2.4U.G0487000/AeUmb.PI554389.v2.7U.G0808300/AeUmb.PI554389.v2.4U.G0681800/AeUmb.PI554389.v2.4U.G0063100/AeUmb.PI554389.v2.4U.G0171200/AeUmb.PI554389.v2.2U.G0403600/AeUmb.PI554389.v2.4U.G0872900/AeUmb.PI554389.v2.6U.G0286000/AeUmb.PI554389.v2.7U.G0121200/AeUmb.PI554389.v2.3U.G0409200/AeUmb.PI554389.v2.3U.G0134300/AeUmb.PI554389.v2.2U.G0591000/AeUmb.PI554389.v2.5U.G0886600/AeUmb.PI5…	29	0.591837
BP	GO:0046394	carboxylic acid biosynthetic process	49	0.459702	1.52855	0.00220066	0.0158728	0.0103502	2078	tags=59%, list=29%, signal=42%	AeUmb.PI554389.v2.4U.G0487000/AeUmb.PI554389.v2.7U.G0808300/AeUmb.PI554389.v2.4U.G0681800/AeUmb.PI554389.v2.4U.G0063100/AeUmb.PI554389.v2.4U.G0171200/AeUmb.PI554389.v2.2U.G0403600/AeUmb.PI554389.v2.4U.G0872900/AeUmb.PI554389.v2.6U.G0286000/AeUmb.PI554389.v2.7U.G0121200/AeUmb.PI554389.v2.3U.G0409200/AeUmb.PI554389.v2.3U.G0134300/AeUmb.PI554389.v2.2U.G0591000/AeUmb.PI554389.v2.5U.G0886600/AeUmb.PI5…	29	0.591837
BP	GO:0016070	RNA metabolic process	487	0.316882	1.20919	0.0022754	0.0162392	0.0105891	3475	tags=62%, list=49%, signal=34%	AeUmb.PI554389.v2.1U.G0269200/AeUmb.PI554389.v2.3U.G0693800/AeUmb.PI554389.v2.2U.G0785400/AeUmb.PI554389.v2.7U.G0932000/AeUmb.PI554389.v2.4U.G0586300/AeUmb.PI554389.v2.4U.G0131200/AeUmb.PI554389.v2.5U.G0797100/AeUmb.PI554389.v2.5U.G0340900/AeUmb.PI554389.v2.7U.G0397300/AeUmb.PI554389.v2.2U.G0164500/AeUmb.PI554389.v2.2U.G0276900/AeUmb.PI554389.v2.7U.G0142900/AeUmb.PI554389.v2.3U.G0041700/AeUmb.PI5…	301	0.61807
CC	GO:0005740	mitochondrial envelope	26	0.535537	1.65085	0.00230762	0.0162975	0.0106272	2320	tags=77%, list=33%, signal=52%	AeUmb.PI554389.v2.5U.G0353800/AeUmb.PI554389.v2.7U.G0840300/AeUmb.PI554389.v2.5U.G0335400/AeUmb.PI554389.v2.5U.G0855500/AeUmb.PI554389.v2.6U.G0471000/AeUmb.PI554389.v2.6U.G0188600/AeUmb.PI554389.v2.5U.G0180100/AeUmb.PI554389.v2.7U.G0988100/AeUmb.PI554389.v2.5U.G0237400/AeUmb.PI554389.v2.5U.G0692000/AeUmb.PI554389.v2.7U.G1004300/AeUmb.PI554389.v2.4U.G0374900/AeUmb.PI554389.v2.7U.G0163000/AeUmb.PI5…	20	0.769231
BP	GO:0009141	nucleoside triphosphate metabolic process	26	0.530029	1.63387	0.00260861	0.017865	0.0116493	2320	tags=69%, list=33%, signal=47%	AeUmb.PI554389.v2.7U.G0273700/AeUmb.PI554389.v2.7U.G0926800/AeUmb.PI554389.v2.5U.G0393900/AeUmb.PI554389.v2.2U.G0170900/AeUmb.PI554389.v2.1U.G0533700/AeUmb.PI554389.v2.5U.G0206200/AeUmb.PI554389.v2.4U.G0929100/AeUmb.PI554389.v2.4U.G0030900/AeUmb.PI554389.v2.4U.G0063600/AeUmb.PI554389.v2.1U.G0270500/AeUmb.PI554389.v2.1U.G0391100/AeUmb.PI554389.v2.2U.G0152300/AeUmb.PI554389.v2.3U.G0601600/AeUmb.PI5…	18	0.692308
MF	GO:0140101	catalytic activity, acting on a tRNA	29	0.515576	1.61197	0.00260678	0.017865	0.0116493	2401	tags=66%, list=34%, signal=43%	AeUmb.PI554389.v2.5U.G0304100/AeUmb.PI554389.v2.2U.G0631400/AeUmb.PI554389.v2.7U.G0900500/AeUmb.PI554389.v2.5U.G0371000/AeUmb.PI554389.v2.4U.G0145500/AeUmb.PI554389.v2.2U.G0583100/AeUmb.PI554389.v2.6U.G0567200/AeUmb.PI554389.v2.6U.G0512700/AeUmb.PI554389.v2.5U.G0256700/AeUmb.PI554389.v2.7U.G0306000/AeUmb.PI554389.v2.7U.G0116700/AeUmb.PI554389.v2.1U.G0270500/AeUmb.PI554389.v2.5U.G0961300/AeUmb.PI5…	19	0.655172
BP	GO:0015031	protein transport	37	0.48887	1.57671	0.0026026	0.017865	0.0116493	2478	tags=68%, list=35%, signal=44%	AeUmb.PI554389.v2.3U.G0110600/AeUmb.PI554389.v2.6U.G0195800/AeUmb.PI554389.v2.6U.G0585700/AeUmb.PI554389.v2.4U.G0155600/AeUmb.PI554389.v2.7U.G0527300/AeUmb.PI554389.v2.6U.G0188600/AeUmb.PI554389.v2.3U.G0074500/AeUmb.PI554389.v2.3U.G0157800/AeUmb.PI554389.v2.6U.G0239900/AeUmb.PI554389.v2.7U.G0988100/AeUmb.PI554389.v2.7U.G0205600/AeUmb.PI554389.v2.1U.G0283600/AeUmb.PI554389.v2.5U.G0508300/AeUmb.PI5…	25	0.675676
BP	GO:0051641	cellular localization	60	0.436685	1.48182	0.00269973	0.0179453	0.0117016	2353	tags=60%, list=33%, signal=40%	AeUmb.PI554389.v2.3U.G0110600/AeUmb.PI554389.v2.4U.G0060400/AeUmb.PI554389.v2.6U.G0195800/AeUmb.PI554389.v2.6U.G0585700/AeUmb.PI554389.v2.4U.G0155600/AeUmb.PI554389.v2.7U.G0527300/AeUmb.PI554389.v2.6U.G0188600/AeUmb.PI554389.v2.3U.G0074500/AeUmb.PI554389.v2.3U.G0157800/AeUmb.PI554389.v2.6U.G0239900/AeUmb.PI554389.v2.5U.G0933200/AeUmb.PI554389.v2.4U.G0939600/AeUmb.PI554389.v2.7U.G0988100/AeUmb.PI5…	36	0.6
BP	GO:0034660	ncRNA metabolic process	63	0.431627	1.47244	0.00269973	0.0179453	0.0117016	2714	tags=67%, list=38%, signal=41%	AeUmb.PI554389.v2.2U.G0631400/AeUmb.PI554389.v2.7U.G0900500/AeUmb.PI554389.v2.5U.G0371000/AeUmb.PI554389.v2.4U.G0145500/AeUmb.PI554389.v2.6U.G0176500/AeUmb.PI554389.v2.2U.G0212100/AeUmb.PI554389.v2.5U.G0370400/AeUmb.PI554389.v2.2U.G0569000/AeUmb.PI554389.v2.7U.G0602200/AeUmb.PI554389.v2.6U.G0567200/AeUmb.PI554389.v2.5U.G0256700/AeUmb.PI554389.v2.7U.G0122700/AeUmb.PI554389.v2.7U.G0306000/AeUmb.PI5…	42	0.666667
MF	GO:0042578	phosphoric ester hydrolase activity	96	0.395664	1.39542	0.00269973	0.0179453	0.0117016	3021	tags=69%, list=43%, signal=40%	AeUmb.PI554389.v2.2U.G0785400/AeUmb.PI554389.v2.7U.G0048700/AeUmb.PI554389.v2.3U.G0409800/AeUmb.PI554389.v2.1U.G0394300/AeUmb.PI554389.v2.5U.G0457800/AeUmb.PI554389.v2.7U.G0583300/AeUmb.PI554389.v2.3U.G0361900/AeUmb.PI554389.v2.7U.G0205000/AeUmb.PI554389.v2.6U.G0104600/AeUmb.PI554389.v2.6U.G0373100/AeUmb.PI554389.v2.5U.G0296400/AeUmb.PI554389.v2.6U.G0052600/AeUmb.PI554389.v2.3U.G0208100/AeUmb.PI5…	66	0.6875
MF	GO:0016836	hydro-lyase activity	14	0.619162	1.7168	0.00289645	0.018053	0.0117719	1509	tags=57%, list=21%, signal=45%	AeUmb.PI554389.v2.4U.G0681800/AeUmb.PI554389.v2.3U.G0228900/AeUmb.PI554389.v2.2U.G0403600/AeUmb.PI554389.v2.6U.G0286000/AeUmb.PI554389.v2.2U.G0591000/AeUmb.PI554389.v2.2U.G0257200/AeUmb.PI554389.v2.7U.G0353000/AeUmb.PI554389.v2.3U.G0213300	8	0.571429
BP	GO:0015980	energy derivation by oxidation of organic compounds	16	0.602113	1.71488	0.00277236	0.018053	0.0117719	2622	tags=94%, list=37%, signal=59%	AeUmb.PI554389.v2.2U.G0253200/AeUmb.PI554389.v2.6U.G0451400/AeUmb.PI554389.v2.7U.G0194400/AeUmb.PI554389.v2.1U.G0585700/AeUmb.PI554389.v2.6U.G0293800/AeUmb.PI554389.v2.6U.G0309500/AeUmb.PI554389.v2.5U.G0693200/AeUmb.PI554389.v2.5U.G0237400/AeUmb.PI554389.v2.3U.G0063200/AeUmb.PI554389.v2.4U.G0962500/AeUmb.PI554389.v2.7U.G0143200/AeUmb.PI554389.v2.1U.G0423600/AeUmb.PI554389.v2.4U.G0932400/AeUmb.PI5…	15	0.9375
BP	GO:0006418	tRNA aminoacylation for protein translation	16	0.601611	1.71345	0.00277236	0.018053	0.0117719	2401	tags=75%, list=34%, signal=50%	AeUmb.PI554389.v2.2U.G0631400/AeUmb.PI554389.v2.7U.G0900500/AeUmb.PI554389.v2.5U.G0371000/AeUmb.PI554389.v2.4U.G0145500/AeUmb.PI554389.v2.6U.G0567200/AeUmb.PI554389.v2.5U.G0256700/AeUmb.PI554389.v2.7U.G0116700/AeUmb.PI554389.v2.5U.G0961300/AeUmb.PI554389.v2.3U.G0006100/AeUmb.PI554389.v2.7U.G0006400/AeUmb.PI554389.v2.1U.G0226600/AeUmb.PI554389.v2.5U.G0190400	12	0.75
BP	GO:0008104	protein localization	41	0.474102	1.54637	0.00290232	0.018053	0.0117719	2478	tags=66%, list=35%, signal=43%	AeUmb.PI554389.v2.3U.G0110600/AeUmb.PI554389.v2.6U.G0195800/AeUmb.PI554389.v2.6U.G0585700/AeUmb.PI554389.v2.4U.G0155600/AeUmb.PI554389.v2.7U.G0527300/AeUmb.PI554389.v2.6U.G0188600/AeUmb.PI554389.v2.3U.G0074500/AeUmb.PI554389.v2.3U.G0157800/AeUmb.PI554389.v2.6U.G0239900/AeUmb.PI554389.v2.4U.G0939600/AeUmb.PI554389.v2.7U.G0988100/AeUmb.PI554389.v2.7U.G0205600/AeUmb.PI554389.v2.1U.G0283600/AeUmb.PI5…	27	0.658537
BP	GO:0045184	establishment of protein localization	41	0.474102	1.54637	0.00290232	0.018053	0.0117719	2478	tags=66%, list=35%, signal=43%	AeUmb.PI554389.v2.3U.G0110600/AeUmb.PI554389.v2.6U.G0195800/AeUmb.PI554389.v2.6U.G0585700/AeUmb.PI554389.v2.4U.G0155600/AeUmb.PI554389.v2.7U.G0527300/AeUmb.PI554389.v2.6U.G0188600/AeUmb.PI554389.v2.3U.G0074500/AeUmb.PI554389.v2.3U.G0157800/AeUmb.PI554389.v2.6U.G0239900/AeUmb.PI554389.v2.4U.G0939600/AeUmb.PI554389.v2.7U.G0988100/AeUmb.PI554389.v2.7U.G0205600/AeUmb.PI554389.v2.1U.G0283600/AeUmb.PI5…	27	0.658537
BP	GO:0070727	cellular macromolecule localization	41	0.474102	1.54637	0.00290232	0.018053	0.0117719	2478	tags=66%, list=35%, signal=43%	AeUmb.PI554389.v2.3U.G0110600/AeUmb.PI554389.v2.6U.G0195800/AeUmb.PI554389.v2.6U.G0585700/AeUmb.PI554389.v2.4U.G0155600/AeUmb.PI554389.v2.7U.G0527300/AeUmb.PI554389.v2.6U.G0188600/AeUmb.PI554389.v2.3U.G0074500/AeUmb.PI554389.v2.3U.G0157800/AeUmb.PI554389.v2.6U.G0239900/AeUmb.PI554389.v2.4U.G0939600/AeUmb.PI554389.v2.7U.G0988100/AeUmb.PI554389.v2.7U.G0205600/AeUmb.PI554389.v2.1U.G0283600/AeUmb.PI5…	27	0.658537
MF	GO:0016853	isomerase activity	53	0.443751	1.48784	0.00280056	0.018053	0.0117719	3213	tags=77%, list=45%, signal=43%	AeUmb.PI554389.v2.2U.G0138100/AeUmb.PI554389.v2.7U.G0926800/AeUmb.PI554389.v2.5U.G0313500/AeUmb.PI554389.v2.5U.G0191200/AeUmb.PI554389.v2.5U.G0327700/AeUmb.PI554389.v2.4U.G1018300/AeUmb.PI554389.v2.7U.G0100600/AeUmb.PI554389.v2.3U.G0344500/AeUmb.PI554389.v2.2U.G0118600/AeUmb.PI554389.v2.5U.G0449000/AeUmb.PI554389.v2.1U.G0086500/AeUmb.PI554389.v2.2U.G0812400/AeUmb.PI554389.v2.1U.G0167100/AeUmb.PI5…	41	0.773585
CC	GO:0070469	respirasome	11	0.67275	1.7726	0.00294813	0.0181712	0.0118489	2324	tags=100%, list=33%, signal=67%	AeUmb.PI554389.v2.5U.G0353800/AeUmb.PI554389.v2.2U.G0057300/AeUmb.PI554389.v2.5U.G0180100/AeUmb.PI554389.v2.5U.G0237400/AeUmb.PI554389.v2.5U.G0692000/AeUmb.PI554389.v2.4U.G0374900/AeUmb.PI554389.v2.2U.G0030200/AeUmb.PI554389.v2.7U.G0143200/AeUmb.PI554389.v2.1U.G0423600/AeUmb.PI554389.v2.4U.G0932400/AeUmb.PI554389.v2.7U.G0286700	11	1
BP	GO:0072524	pyridine-containing compound metabolic process	24	0.53705	1.6356	0.0031137	0.0186822	0.0121822	2882	tags=88%, list=41%, signal=52%	AeUmb.PI554389.v2.7U.G0926800/AeUmb.PI554389.v2.5U.G0393900/AeUmb.PI554389.v2.2U.G0170900/AeUmb.PI554389.v2.5U.G0607900/AeUmb.PI554389.v2.4U.G0915500/AeUmb.PI554389.v2.1U.G0533700/AeUmb.PI554389.v2.5U.G0206200/AeUmb.PI554389.v2.4U.G0929100/AeUmb.PI554389.v2.7U.G0414800/AeUmb.PI554389.v2.1U.G0270500/AeUmb.PI554389.v2.4U.G0699400/AeUmb.PI554389.v2.4U.G0652300/AeUmb.PI554389.v2.3U.G0601600/AeUmb.PI5…	21	0.875
BP	GO:0044283	small molecule biosynthetic process	61	0.434007	1.47574	0.00309969	0.0186822	0.0121822	3465	tags=80%, list=49%, signal=41%	AeUmb.PI554389.v2.4U.G0487000/AeUmb.PI554389.v2.7U.G0808300/AeUmb.PI554389.v2.4U.G0681800/AeUmb.PI554389.v2.4U.G0063100/AeUmb.PI554389.v2.4U.G0171200/AeUmb.PI554389.v2.3U.G0228900/AeUmb.PI554389.v2.2U.G0403600/AeUmb.PI554389.v2.4U.G0872900/AeUmb.PI554389.v2.6U.G0286000/AeUmb.PI554389.v2.7U.G0121200/AeUmb.PI554389.v2.3U.G0409200/AeUmb.PI554389.v2.3U.G0134300/AeUmb.PI554389.v2.2U.G0591000/AeUmb.PI5…	49	0.803279
BP	GO:0071705	nitrogen compound transport	62	0.431399	1.46925	0.00309969	0.0186822	0.0121822	2632	tags=65%, list=37%, signal=41%	AeUmb.PI554389.v2.3U.G0110600/AeUmb.PI554389.v2.6U.G0195800/AeUmb.PI554389.v2.6U.G0585700/AeUmb.PI554389.v2.4U.G0155600/AeUmb.PI554389.v2.7U.G0527300/AeUmb.PI554389.v2.7U.G0303500/AeUmb.PI554389.v2.6U.G0188600/AeUmb.PI554389.v2.3U.G0074500/AeUmb.PI554389.v2.3U.G0157800/AeUmb.PI554389.v2.6U.G0239900/AeUmb.PI554389.v2.7U.G0988100/AeUmb.PI554389.v2.6U.G0227800/AeUmb.PI554389.v2.7U.G0205600/AeUmb.PI5…	40	0.645161
BP	GO:0006090	pyruvate metabolic process	15	0.597801	1.68099	0.00329965	0.0196242	0.0127964	2559	tags=87%, list=36%, signal=55%	AeUmb.PI554389.v2.6U.G0611800/AeUmb.PI554389.v2.7U.G0926800/AeUmb.PI554389.v2.5U.G0393900/AeUmb.PI554389.v2.2U.G0170900/AeUmb.PI554389.v2.1U.G0533700/AeUmb.PI554389.v2.5U.G0206200/AeUmb.PI554389.v2.4U.G0929100/AeUmb.PI554389.v2.1U.G0270500/AeUmb.PI554389.v2.3U.G0601600/AeUmb.PI554389.v2.5U.G0186900/AeUmb.PI554389.v2.7U.G0303200/AeUmb.PI554389.v2.4U.G0248600/AeUmb.PI554389.v2.2U.G0892100	13	0.866667
BP	GO:0045333	cellular respiration	14	0.614066	1.70267	0.00341368	0.0196812	0.0128336	2107	tags=86%, list=30%, signal=60%	AeUmb.PI554389.v2.6U.G0451400/AeUmb.PI554389.v2.7U.G0194400/AeUmb.PI554389.v2.1U.G0585700/AeUmb.PI554389.v2.6U.G0293800/AeUmb.PI554389.v2.6U.G0309500/AeUmb.PI554389.v2.5U.G0693200/AeUmb.PI554389.v2.5U.G0237400/AeUmb.PI554389.v2.3U.G0063200/AeUmb.PI554389.v2.4U.G0962500/AeUmb.PI554389.v2.7U.G0143200/AeUmb.PI554389.v2.1U.G0423600/AeUmb.PI554389.v2.4U.G0932400	12	0.857143
BP	GO:0009144	purine nucleoside triphosphate metabolic process	22	0.549315	1.65054	0.00342535	0.0196812	0.0128336	2320	tags=73%, list=33%, signal=49%	AeUmb.PI554389.v2.7U.G0273700/AeUmb.PI554389.v2.7U.G0926800/AeUmb.PI554389.v2.5U.G0393900/AeUmb.PI554389.v2.2U.G0170900/AeUmb.PI554389.v2.1U.G0533700/AeUmb.PI554389.v2.5U.G0206200/AeUmb.PI554389.v2.4U.G0929100/AeUmb.PI554389.v2.1U.G0270500/AeUmb.PI554389.v2.1U.G0391100/AeUmb.PI554389.v2.2U.G0152300/AeUmb.PI554389.v2.3U.G0601600/AeUmb.PI554389.v2.Un.G0049900/AeUmb.PI554389.v2.5U.G0186900/AeUmb.PI5…	16	0.727273
BP	GO:0009205	purine ribonucleoside triphosphate metabolic process	22	0.549315	1.65054	0.00342535	0.0196812	0.0128336	2320	tags=73%, list=33%, signal=49%	AeUmb.PI554389.v2.7U.G0273700/AeUmb.PI554389.v2.7U.G0926800/AeUmb.PI554389.v2.5U.G0393900/AeUmb.PI554389.v2.2U.G0170900/AeUmb.PI554389.v2.1U.G0533700/AeUmb.PI554389.v2.5U.G0206200/AeUmb.PI554389.v2.4U.G0929100/AeUmb.PI554389.v2.1U.G0270500/AeUmb.PI554389.v2.1U.G0391100/AeUmb.PI554389.v2.2U.G0152300/AeUmb.PI554389.v2.3U.G0601600/AeUmb.PI554389.v2.Un.G0049900/AeUmb.PI554389.v2.5U.G0186900/AeUmb.PI5…	16	0.727273
BP	GO:0065003	protein-containing complex assembly	55	0.437784	1.47282	0.0034	0.0196812	0.0128336	2764	tags=64%, list=39%, signal=39%	AeUmb.PI554389.v2.4U.G0131200/AeUmb.PI554389.v2.7U.G0081800/AeUmb.PI554389.v2.2U.G0069900/AeUmb.PI554389.v2.5U.G0253800/AeUmb.PI554389.v2.6U.G0716000/AeUmb.PI554389.v2.5U.G0390300/AeUmb.PI554389.v2.5U.G0370400/AeUmb.PI554389.v2.3U.G0246900/AeUmb.PI554389.v2.2U.G0024300/AeUmb.PI554389.v2.6U.G0426800/AeUmb.PI554389.v2.6U.G0363200/AeUmb.PI554389.v2.2U.G0443100/AeUmb.PI554389.v2.2U.G0113500/AeUmb.PI5…	35	0.636364
BP	GO:0046434	organophosphate catabolic process	16	0.592164	1.68654	0.00349112	0.0198906	0.0129701	2204	tags=75%, list=31%, signal=52%	AeUmb.PI554389.v2.7U.G0926800/AeUmb.PI554389.v2.5U.G0393900/AeUmb.PI554389.v2.2U.G0170900/AeUmb.PI554389.v2.1U.G0533700/AeUmb.PI554389.v2.5U.G0206200/AeUmb.PI554389.v2.6U.G0157400/AeUmb.PI554389.v2.4U.G0929100/AeUmb.PI554389.v2.1U.G0270500/AeUmb.PI554389.v2.3U.G0601600/AeUmb.PI554389.v2.5U.G0186900/AeUmb.PI554389.v2.7U.G0303200/AeUmb.PI554389.v2.4U.G0248600	12	0.75
BP	GO:0042908	xenobiotic transport	14	-0.463836	-1.80462	0.00375662	0.020877	0.0136133	3803	tags=100%, list=54%, signal=46%	AeUmb.PI554389.v2.4U.G0874000/AeUmb.PI554389.v2.4U.G0873900/AeUmb.PI554389.v2.3U.G0663600/AeUmb.PI554389.v2.5U.G0595000/AeUmb.PI554389.v2.4U.G0479100/AeUmb.PI554389.v2.2U.G0406000/AeUmb.PI554389.v2.6U.G0012300/AeUmb.PI554389.v2.Un.G0050800/AeUmb.PI554389.v2.3U.G0297300/AeUmb.PI554389.v2.4U.G0169600/AeUmb.PI554389.v2.7U.G0472500/AeUmb.PI554389.v2.3U.G0663800/AeUmb.PI554389.v2.7U.G0059600	13	0.928571
BP	GO:0046618	xenobiotic export from cell	14	-0.463836	-1.80462	0.00375662	0.020877	0.0136133	3803	tags=100%, list=54%, signal=46%	AeUmb.PI554389.v2.4U.G0874000/AeUmb.PI554389.v2.4U.G0873900/AeUmb.PI554389.v2.3U.G0663600/AeUmb.PI554389.v2.5U.G0595000/AeUmb.PI554389.v2.4U.G0479100/AeUmb.PI554389.v2.2U.G0406000/AeUmb.PI554389.v2.6U.G0012300/AeUmb.PI554389.v2.Un.G0050800/AeUmb.PI554389.v2.3U.G0297300/AeUmb.PI554389.v2.4U.G0169600/AeUmb.PI554389.v2.7U.G0472500/AeUmb.PI554389.v2.3U.G0663800/AeUmb.PI554389.v2.7U.G0059600	13	0.928571
BP	GO:1990961	xenobiotic detoxification by transmembrane export across the plasma membrane	14	-0.463836	-1.80462	0.00375662	0.020877	0.0136133	3803	tags=100%, list=54%, signal=46%	AeUmb.PI554389.v2.4U.G0874000/AeUmb.PI554389.v2.4U.G0873900/AeUmb.PI554389.v2.3U.G0663600/AeUmb.PI554389.v2.5U.G0595000/AeUmb.PI554389.v2.4U.G0479100/AeUmb.PI554389.v2.2U.G0406000/AeUmb.PI554389.v2.6U.G0012300/AeUmb.PI554389.v2.Un.G0050800/AeUmb.PI554389.v2.3U.G0297300/AeUmb.PI554389.v2.4U.G0169600/AeUmb.PI554389.v2.7U.G0472500/AeUmb.PI554389.v2.3U.G0663800/AeUmb.PI554389.v2.7U.G0059600	13	0.928571
CC	GO:0098803	respiratory chain complex	10	0.672655	1.73182	0.00385109	0.021228	0.0138422	2324	tags=100%, list=33%, signal=67%	AeUmb.PI554389.v2.5U.G0353800/AeUmb.PI554389.v2.2U.G0057300/AeUmb.PI554389.v2.5U.G0237400/AeUmb.PI554389.v2.5U.G0692000/AeUmb.PI554389.v2.4U.G0374900/AeUmb.PI554389.v2.2U.G0030200/AeUmb.PI554389.v2.7U.G0143200/AeUmb.PI554389.v2.1U.G0423600/AeUmb.PI554389.v2.4U.G0932400/AeUmb.PI554389.v2.7U.G0286700	10	1
CC	GO:0009579	thylakoid	51	0.44123	1.47336	0.00390117	0.0213306	0.0139091	3249	tags=78%, list=46%, signal=43%	AeUmb.PI554389.v2.3U.G0291500/AeUmb.PI554389.v2.6U.G0016400/AeUmb.PI554389.v2.5U.G0704500/AeUmb.PI554389.v2.5U.G0319600/AeUmb.PI554389.v2.4U.G0771900/AeUmb.PI554389.v2.4U.G0862600/AeUmb.PI554389.v2.3U.G0327300/AeUmb.PI554389.v2.2U.G0273000/AeUmb.PI554389.v2.5U.G0820100/AeUmb.PI554389.v2.2U.G0195300/AeUmb.PI554389.v2.6U.G0584600/AeUmb.PI554389.v2.5U.G0216700/AeUmb.PI554389.v2.7U.G0023600/AeUmb.PI5…	40	0.784314
BP	GO:0019693	ribose phosphate metabolic process	35	0.485752	1.55574	0.00400481	0.0217221	0.0141644	2702	tags=74%, list=38%, signal=46%	AeUmb.PI554389.v2.6U.G0611800/AeUmb.PI554389.v2.7U.G0273700/AeUmb.PI554389.v2.7U.G0926800/AeUmb.PI554389.v2.5U.G0393900/AeUmb.PI554389.v2.2U.G0170900/AeUmb.PI554389.v2.1U.G0223100/AeUmb.PI554389.v2.1U.G0533700/AeUmb.PI554389.v2.5U.G0206200/AeUmb.PI554389.v2.4U.G0929100/AeUmb.PI554389.v2.4U.G0030900/AeUmb.PI554389.v2.4U.G0063600/AeUmb.PI554389.v2.1U.G0270500/AeUmb.PI554389.v2.1U.G0391100/AeUmb.PI5…	26	0.742857
MF	GO:0004812	aminoacyl-tRNA ligase activity	17	0.576941	1.66046	0.00428922	0.0219181	0.0142922	2401	tags=71%, list=34%, signal=47%	AeUmb.PI554389.v2.2U.G0631400/AeUmb.PI554389.v2.7U.G0900500/AeUmb.PI554389.v2.5U.G0371000/AeUmb.PI554389.v2.4U.G0145500/AeUmb.PI554389.v2.6U.G0567200/AeUmb.PI554389.v2.5U.G0256700/AeUmb.PI554389.v2.7U.G0116700/AeUmb.PI554389.v2.5U.G0961300/AeUmb.PI554389.v2.3U.G0006100/AeUmb.PI554389.v2.7U.G0006400/AeUmb.PI554389.v2.1U.G0226600/AeUmb.PI554389.v2.5U.G0190400	12	0.705882
MF	GO:0016875	ligase activity, forming carbon-oxygen bonds	17	0.576941	1.66046	0.00428922	0.0219181	0.0142922	2401	tags=71%, list=34%, signal=47%	AeUmb.PI554389.v2.2U.G0631400/AeUmb.PI554389.v2.7U.G0900500/AeUmb.PI554389.v2.5U.G0371000/AeUmb.PI554389.v2.4U.G0145500/AeUmb.PI554389.v2.6U.G0567200/AeUmb.PI554389.v2.5U.G0256700/AeUmb.PI554389.v2.7U.G0116700/AeUmb.PI554389.v2.5U.G0961300/AeUmb.PI554389.v2.3U.G0006100/AeUmb.PI554389.v2.7U.G0006400/AeUmb.PI554389.v2.1U.G0226600/AeUmb.PI554389.v2.5U.G0190400	12	0.705882
BP	GO:0043038	amino acid activation	17	0.576941	1.66046	0.00428922	0.0219181	0.0142922	2401	tags=71%, list=34%, signal=47%	AeUmb.PI554389.v2.2U.G0631400/AeUmb.PI554389.v2.7U.G0900500/AeUmb.PI554389.v2.5U.G0371000/AeUmb.PI554389.v2.4U.G0145500/AeUmb.PI554389.v2.6U.G0567200/AeUmb.PI554389.v2.5U.G0256700/AeUmb.PI554389.v2.7U.G0116700/AeUmb.PI554389.v2.5U.G0961300/AeUmb.PI554389.v2.3U.G0006100/AeUmb.PI554389.v2.7U.G0006400/AeUmb.PI554389.v2.1U.G0226600/AeUmb.PI554389.v2.5U.G0190400	12	0.705882
BP	GO:0043039	tRNA aminoacylation	17	0.576941	1.66046	0.00428922	0.0219181	0.0142922	2401	tags=71%, list=34%, signal=47%	AeUmb.PI554389.v2.2U.G0631400/AeUmb.PI554389.v2.7U.G0900500/AeUmb.PI554389.v2.5U.G0371000/AeUmb.PI554389.v2.4U.G0145500/AeUmb.PI554389.v2.6U.G0567200/AeUmb.PI554389.v2.5U.G0256700/AeUmb.PI554389.v2.7U.G0116700/AeUmb.PI554389.v2.5U.G0961300/AeUmb.PI554389.v2.3U.G0006100/AeUmb.PI554389.v2.7U.G0006400/AeUmb.PI554389.v2.1U.G0226600/AeUmb.PI554389.v2.5U.G0190400	12	0.705882
CC	GO:0140513	nuclear protein-containing complex	70	0.4108	1.41305	0.00429957	0.0219181	0.0142922	2779	tags=70%, list=39%, signal=43%	AeUmb.PI554389.v2.4U.G0131200/AeUmb.PI554389.v2.7U.G0654500/AeUmb.PI554389.v2.7U.G0310400/AeUmb.PI554389.v2.5U.G0718400/AeUmb.PI554389.v2.2U.G0111200/AeUmb.PI554389.v2.2U.G0069900/AeUmb.PI554389.v2.7U.G0179100/AeUmb.PI554389.v2.1U.G0557300/AeUmb.PI554389.v2.3U.G0390700/AeUmb.PI554389.v2.5U.G0619800/AeUmb.PI554389.v2.1U.G0307900/AeUmb.PI554389.v2.6U.G0204600/AeUmb.PI554389.v2.4U.G0798000/AeUmb.PI5…	49	0.7
MF	GO:0015075	monoatomic ion transmembrane transporter activity	78	0.406967	1.4127	0.00419958	0.0219181	0.0142922	2320	tags=54%, list=33%, signal=37%	AeUmb.PI554389.v2.5U.G0618600/AeUmb.PI554389.v2.7U.G0273700/AeUmb.PI554389.v2.6U.G0629300/AeUmb.PI554389.v2.6U.G0421700/AeUmb.PI554389.v2.3U.G0195000/AeUmb.PI554389.v2.7U.G0442800/AeUmb.PI554389.v2.1U.G0067500/AeUmb.PI554389.v2.1U.G0460500/AeUmb.PI554389.v2.2U.G0463900/AeUmb.PI554389.v2.6U.G0460100/AeUmb.PI554389.v2.5U.G0335400/AeUmb.PI554389.v2.3U.G0224900/AeUmb.PI554389.v2.6U.G0017900/AeUmb.PI5…	42	0.538462
BP	GO:0006091	generation of precursor metabolites and energy	88	0.399023	1.39816	0.00409959	0.0219181	0.0142922	3266	tags=74%, list=46%, signal=40%	AeUmb.PI554389.v2.6U.G0750900/AeUmb.PI554389.v2.2U.G0253200/AeUmb.PI554389.v2.7U.G0926800/AeUmb.PI554389.v2.6U.G0016400/AeUmb.PI554389.v2.6U.G0451400/AeUmb.PI554389.v2.5U.G0393900/AeUmb.PI554389.v2.2U.G0170900/AeUmb.PI554389.v2.2U.G0096000/AeUmb.PI554389.v2.7U.G0194400/AeUmb.PI554389.v2.5U.G0507300/AeUmb.PI554389.v2.1U.G0533700/AeUmb.PI554389.v2.5U.G0206200/AeUmb.PI554389.v2.1U.G0585700/AeUmb.PI5…	65	0.738636
MF	GO:0016462	pyrophosphatase activity	124	0.372064	1.33483	0.00419958	0.0219181	0.0142922	1360	tags=36%, list=19%, signal=30%	AeUmb.PI554389.v2.2U.G0785400/AeUmb.PI554389.v2.6U.G0312800/AeUmb.PI554389.v2.7U.G0557000/AeUmb.PI554389.v2.4U.G0060400/AeUmb.PI554389.v2.2U.G0743100/AeUmb.PI554389.v2.7U.G0278000/AeUmb.PI554389.v2.2U.G0569200/AeUmb.PI554389.v2.4U.G0524900/AeUmb.PI554389.v2.6U.G0195800/AeUmb.PI554389.v2.1U.G0275500/AeUmb.PI554389.v2.4U.G0028600/AeUmb.PI554389.v2.1U.G0550500/AeUmb.PI554389.v2.2U.G0302800/AeUmb.PI5…	45	0.362903
MF	GO:0051536	iron-sulfur cluster binding	37	0.472525	1.52399	0.0046046	0.0231253	0.0150794	2921	tags=73%, list=41%, signal=43%	AeUmb.PI554389.v2.2U.G0169000/AeUmb.PI554389.v2.4U.G0681800/AeUmb.PI554389.v2.7U.G1029900/AeUmb.PI554389.v2.4U.G0899500/AeUmb.PI554389.v2.6U.G0460100/AeUmb.PI554389.v2.4U.G0912600/AeUmb.PI554389.v2.7U.G0194400/AeUmb.PI554389.v2.5U.G0507300/AeUmb.PI554389.v2.7U.G0121200/AeUmb.PI554389.v2.6U.G0311400/AeUmb.PI554389.v2.7U.G0646100/AeUmb.PI554389.v2.5U.G0694400/AeUmb.PI554389.v2.3U.G0213700/AeUmb.PI5…	27	0.72973
MF	GO:0051540	metal cluster binding	37	0.472525	1.52399	0.0046046	0.0231253	0.0150794	2921	tags=73%, list=41%, signal=43%	AeUmb.PI554389.v2.2U.G0169000/AeUmb.PI554389.v2.4U.G0681800/AeUmb.PI554389.v2.7U.G1029900/AeUmb.PI554389.v2.4U.G0899500/AeUmb.PI554389.v2.6U.G0460100/AeUmb.PI554389.v2.4U.G0912600/AeUmb.PI554389.v2.7U.G0194400/AeUmb.PI554389.v2.5U.G0507300/AeUmb.PI554389.v2.7U.G0121200/AeUmb.PI554389.v2.6U.G0311400/AeUmb.PI554389.v2.7U.G0646100/AeUmb.PI554389.v2.5U.G0694400/AeUmb.PI554389.v2.3U.G0213700/AeUmb.PI5…	27	0.72973
CC	GO:0005634	nucleus	147	0.36106	1.30894	0.00469953	0.0234285	0.0152771	3642	tags=75%, list=51%, signal=37%	AeUmb.PI554389.v2.1U.G0269200/AeUmb.PI554389.v2.6U.G0402300/AeUmb.PI554389.v2.3U.G0409800/AeUmb.PI554389.v2.4U.G0131200/AeUmb.PI554389.v2.5U.G0797100/AeUmb.PI554389.v2.6U.G0181400/AeUmb.PI554389.v2.7U.G0654500/AeUmb.PI554389.v2.7U.G0310400/AeUmb.PI554389.v2.5U.G0718400/AeUmb.PI554389.v2.2U.G0111200/AeUmb.PI554389.v2.2U.G0069900/AeUmb.PI554389.v2.7U.G0066800/AeUmb.PI554389.v2.4U.G0729500/AeUmb.PI5…	110	0.748299
BP	GO:0006397	mRNA processing	49	0.440303	1.46405	0.00490147	0.0240811	0.0157027	3024	tags=73%, list=43%, signal=42%	AeUmb.PI554389.v2.1U.G0269200/AeUmb.PI554389.v2.2U.G0785400/AeUmb.PI554389.v2.4U.G0131200/AeUmb.PI554389.v2.2U.G0276900/AeUmb.PI554389.v2.6U.G0181400/AeUmb.PI554389.v2.5U.G0718400/AeUmb.PI554389.v2.2U.G0069900/AeUmb.PI554389.v2.3U.G0400600/AeUmb.PI554389.v2.7U.G0066800/AeUmb.PI554389.v2.7U.G0177800/AeUmb.PI554389.v2.2U.G0310100/AeUmb.PI554389.v2.3U.G0122500/AeUmb.PI554389.v2.6U.G0426800/AeUmb.PI5…	36	0.734694
MF	GO:0016818	hydrolase activity, acting on acid anhydrides, in phosphorus-containing anhydrides	125	0.369427	1.32611	0.00489951	0.0240811	0.0157027	1360	tags=36%, list=19%, signal=30%	AeUmb.PI554389.v2.2U.G0785400/AeUmb.PI554389.v2.6U.G0312800/AeUmb.PI554389.v2.7U.G0557000/AeUmb.PI554389.v2.4U.G0060400/AeUmb.PI554389.v2.2U.G0743100/AeUmb.PI554389.v2.7U.G0278000/AeUmb.PI554389.v2.2U.G0569200/AeUmb.PI554389.v2.4U.G0524900/AeUmb.PI554389.v2.6U.G0195800/AeUmb.PI554389.v2.1U.G0275500/AeUmb.PI554389.v2.4U.G0028600/AeUmb.PI554389.v2.1U.G0550500/AeUmb.PI554389.v2.2U.G0302800/AeUmb.PI5…	45	0.36
BP	GO:0046034	ATP metabolic process	21	0.542177	1.61801	0.00504796	0.0246224	0.0160556	2320	tags=71%, list=33%, signal=48%	AeUmb.PI554389.v2.7U.G0273700/AeUmb.PI554389.v2.7U.G0926800/AeUmb.PI554389.v2.5U.G0393900/AeUmb.PI554389.v2.2U.G0170900/AeUmb.PI554389.v2.1U.G0533700/AeUmb.PI554389.v2.5U.G0206200/AeUmb.PI554389.v2.4U.G0929100/AeUmb.PI554389.v2.1U.G0270500/AeUmb.PI554389.v2.2U.G0152300/AeUmb.PI554389.v2.3U.G0601600/AeUmb.PI554389.v2.Un.G0049900/AeUmb.PI554389.v2.5U.G0186900/AeUmb.PI554389.v2.7U.G0303200/AeUmb.PI5…	15	0.714286
BP	GO:0006629	lipid metabolic process	107	0.379577	1.34939	0.00509949	0.0246961	0.0161037	3139	tags=64%, list=44%, signal=36%	AeUmb.PI554389.v2.2U.G0138100/AeUmb.PI554389.v2.3U.G0383600/AeUmb.PI554389.v2.7U.G1073900/AeUmb.PI554389.v2.7U.G0205000/AeUmb.PI554389.v2.6U.G0373100/AeUmb.PI554389.v2.5U.G0296400/AeUmb.PI554389.v2.5U.G0913900/AeUmb.PI554389.v2.4U.G0741200/AeUmb.PI554389.v2.7U.G0888800/AeUmb.PI554389.v2.2U.G0571600/AeUmb.PI554389.v2.5U.G0268200/AeUmb.PI554389.v2.6U.G0229300/AeUmb.PI554389.v2.6U.G0473800/AeUmb.PI5…	68	0.635514
BP	GO:0009166	nucleotide catabolic process	15	0.583715	1.64138	0.00525882	0.025109	0.0163729	2204	tags=73%, list=31%, signal=51%	AeUmb.PI554389.v2.7U.G0926800/AeUmb.PI554389.v2.5U.G0393900/AeUmb.PI554389.v2.2U.G0170900/AeUmb.PI554389.v2.1U.G0533700/AeUmb.PI554389.v2.5U.G0206200/AeUmb.PI554389.v2.4U.G0929100/AeUmb.PI554389.v2.1U.G0270500/AeUmb.PI554389.v2.3U.G0601600/AeUmb.PI554389.v2.5U.G0186900/AeUmb.PI554389.v2.7U.G0303200/AeUmb.PI554389.v2.4U.G0248600	11	0.733333
BP	GO:1901292	nucleoside phosphate catabolic process	15	0.583715	1.64138	0.00525882	0.025109	0.0163729	2204	tags=73%, list=31%, signal=51%	AeUmb.PI554389.v2.7U.G0926800/AeUmb.PI554389.v2.5U.G0393900/AeUmb.PI554389.v2.2U.G0170900/AeUmb.PI554389.v2.1U.G0533700/AeUmb.PI554389.v2.5U.G0206200/AeUmb.PI554389.v2.4U.G0929100/AeUmb.PI554389.v2.1U.G0270500/AeUmb.PI554389.v2.3U.G0601600/AeUmb.PI554389.v2.5U.G0186900/AeUmb.PI554389.v2.7U.G0303200/AeUmb.PI554389.v2.4U.G0248600	11	0.733333
CC	GO:0140535	intracellular protein-containing complex	51	0.436568	1.45779	0.00530159	0.0251362	0.0163906	3150	tags=73%, list=44%, signal=41%	AeUmb.PI554389.v2.4U.G0914600/AeUmb.PI554389.v2.4U.G0160900/AeUmb.PI554389.v2.2U.G0630400/AeUmb.PI554389.v2.2U.G0100400/AeUmb.PI554389.v2.5U.G0212100/AeUmb.PI554389.v2.6U.G0694800/AeUmb.PI554389.v2.5U.G0926100/AeUmb.PI554389.v2.1U.G0557300/AeUmb.PI554389.v2.3U.G0390700/AeUmb.PI554389.v2.4U.G1007500/AeUmb.PI554389.v2.4U.G0798000/AeUmb.PI554389.v2.1U.G0389000/AeUmb.PI554389.v2.5U.G0274400/AeUmb.PI5…	37	0.72549
BP	GO:0006793	phosphorus metabolic process	385	0.317089	1.20063	0.00579942	0.0273056	0.0178052	3384	tags=59%, list=48%, signal=33%	AeUmb.PI554389.v2.7U.G0637700/AeUmb.PI554389.v2.6U.G0611800/AeUmb.PI554389.v2.7U.G0140200/AeUmb.PI554389.v2.2U.G0785400/AeUmb.PI554389.v2.7U.G0048700/AeUmb.PI554389.v2.5U.G0605400/AeUmb.PI554389.v2.2U.G0109400/AeUmb.PI554389.v2.7U.G0273700/AeUmb.PI554389.v2.1U.G0394300/AeUmb.PI554389.v2.7U.G0926800/AeUmb.PI554389.v2.5U.G0393900/AeUmb.PI554389.v2.3U.G0383600/AeUmb.PI554389.v2.7U.G0583300/AeUmb.PI5…	227	0.58961
MF	GO:0008324	monoatomic cation transmembrane transporter activity	63	0.416194	1.41979	0.00589941	0.0275848	0.0179873	2434	tags=57%, list=34%, signal=38%	AeUmb.PI554389.v2.7U.G0273700/AeUmb.PI554389.v2.6U.G0421700/AeUmb.PI554389.v2.3U.G0195000/AeUmb.PI554389.v2.7U.G0442800/AeUmb.PI554389.v2.1U.G0067500/AeUmb.PI554389.v2.1U.G0460500/AeUmb.PI554389.v2.2U.G0463900/AeUmb.PI554389.v2.6U.G0460100/AeUmb.PI554389.v2.3U.G0224900/AeUmb.PI554389.v2.6U.G0017900/AeUmb.PI554389.v2.1U.G0226300/AeUmb.PI554389.v2.4U.G0918000/AeUmb.PI554389.v2.7U.G0070300/AeUmb.PI5…	36	0.571429
BP	GO:0016043	cellular component organization	162	0.350419	1.27773	0.00609939	0.0283246	0.0184697	2783	tags=51%, list=39%, signal=32%	AeUmb.PI554389.v2.4U.G0160900/AeUmb.PI554389.v2.4U.G0131200/AeUmb.PI554389.v2.7U.G0081800/AeUmb.PI554389.v2.6U.G0763700/AeUmb.PI554389.v2.2U.G0108900/AeUmb.PI554389.v2.5U.G0313500/AeUmb.PI554389.v2.4U.G0644300/AeUmb.PI554389.v2.4U.G0912600/AeUmb.PI554389.v2.2U.G0069900/AeUmb.PI554389.v2.4U.G0028600/AeUmb.PI554389.v2.4U.G0267400/AeUmb.PI554389.v2.5U.G0253800/AeUmb.PI554389.v2.2U.G0646100/AeUmb.PI5…	83	0.512346
MF	GO:0016817	hydrolase activity, acting on acid anhydrides	126	0.36594	1.31428	0.00619938	0.0285931	0.0186448	1360	tags=36%, list=19%, signal=29%	AeUmb.PI554389.v2.2U.G0785400/AeUmb.PI554389.v2.6U.G0312800/AeUmb.PI554389.v2.7U.G0557000/AeUmb.PI554389.v2.4U.G0060400/AeUmb.PI554389.v2.2U.G0743100/AeUmb.PI554389.v2.7U.G0278000/AeUmb.PI554389.v2.2U.G0569200/AeUmb.PI554389.v2.4U.G0524900/AeUmb.PI554389.v2.6U.G0195800/AeUmb.PI554389.v2.1U.G0275500/AeUmb.PI554389.v2.4U.G0028600/AeUmb.PI554389.v2.1U.G0550500/AeUmb.PI554389.v2.2U.G0302800/AeUmb.PI5…	45	0.357143
BP	GO:0009060	aerobic respiration	13	0.606231	1.65458	0.0062422	0.028596	0.0186467	2107	tags=85%, list=30%, signal=60%	AeUmb.PI554389.v2.6U.G0451400/AeUmb.PI554389.v2.7U.G0194400/AeUmb.PI554389.v2.1U.G0585700/AeUmb.PI554389.v2.6U.G0293800/AeUmb.PI554389.v2.5U.G0693200/AeUmb.PI554389.v2.5U.G0237400/AeUmb.PI554389.v2.3U.G0063200/AeUmb.PI554389.v2.4U.G0962500/AeUmb.PI554389.v2.7U.G0143200/AeUmb.PI554389.v2.1U.G0423600/AeUmb.PI554389.v2.4U.G0932400	11	0.846154
BP	GO:0009259	ribonucleotide metabolic process	33	0.478348	1.52124	0.00651172	0.0296305	0.0193212	2877	tags=76%, list=41%, signal=45%	AeUmb.PI554389.v2.6U.G0611800/AeUmb.PI554389.v2.7U.G0273700/AeUmb.PI554389.v2.7U.G0926800/AeUmb.PI554389.v2.5U.G0393900/AeUmb.PI554389.v2.2U.G0170900/AeUmb.PI554389.v2.1U.G0223100/AeUmb.PI554389.v2.1U.G0533700/AeUmb.PI554389.v2.5U.G0206200/AeUmb.PI554389.v2.4U.G0929100/AeUmb.PI554389.v2.4U.G0030900/AeUmb.PI554389.v2.4U.G0063600/AeUmb.PI554389.v2.1U.G0270500/AeUmb.PI554389.v2.1U.G0391100/AeUmb.PI5…	25	0.757576
BP	GO:0006796	phosphate-containing compound metabolic process	383	0.316467	1.19819	0.00659934	0.029829	0.0194507	3384	tags=59%, list=48%, signal=33%	AeUmb.PI554389.v2.7U.G0637700/AeUmb.PI554389.v2.6U.G0611800/AeUmb.PI554389.v2.7U.G0140200/AeUmb.PI554389.v2.2U.G0785400/AeUmb.PI554389.v2.7U.G0048700/AeUmb.PI554389.v2.2U.G0109400/AeUmb.PI554389.v2.7U.G0273700/AeUmb.PI554389.v2.1U.G0394300/AeUmb.PI554389.v2.7U.G0926800/AeUmb.PI554389.v2.5U.G0393900/AeUmb.PI554389.v2.3U.G0383600/AeUmb.PI554389.v2.7U.G0583300/AeUmb.PI554389.v2.2U.G0170900/AeUmb.PI5…	226	0.590078
BP	GO:0006812	monoatomic cation transport	57	0.424444	1.43301	0.0067	0.0300834	0.0196166	2225	tags=54%, list=31%, signal=38%	AeUmb.PI554389.v2.7U.G0273700/AeUmb.PI554389.v2.6U.G0421700/AeUmb.PI554389.v2.3U.G0195000/AeUmb.PI554389.v2.7U.G0442800/AeUmb.PI554389.v2.1U.G0460500/AeUmb.PI554389.v2.2U.G0463900/AeUmb.PI554389.v2.3U.G0224900/AeUmb.PI554389.v2.1U.G0226300/AeUmb.PI554389.v2.4U.G0918000/AeUmb.PI554389.v2.7U.G0070300/AeUmb.PI554389.v2.2U.G0158700/AeUmb.PI554389.v2.6U.G0149900/AeUmb.PI554389.v2.4U.G0815000/AeUmb.PI5…	31	0.54386
MF	GO:0008237	metallopeptidase activity	31	0.484024	1.52655	0.00701262	0.03128	0.0203968	1526	tags=52%, list=22%, signal=41%	AeUmb.PI554389.v2.2U.G0228500/AeUmb.PI554389.v2.5U.G0335800/AeUmb.PI554389.v2.7U.G0293800/AeUmb.PI554389.v2.4U.G0689600/AeUmb.PI554389.v2.6U.G0422100/AeUmb.PI554389.v2.6U.G0502100/AeUmb.PI554389.v2.2U.G0448600/AeUmb.PI554389.v2.3U.G0265700/AeUmb.PI554389.v2.7U.G0456900/AeUmb.PI554389.v2.3U.G0260300/AeUmb.PI554389.v2.6U.G0589100/AeUmb.PI554389.v2.7U.G0233400/AeUmb.PI554389.v2.7U.G0557900/AeUmb.PI5…	16	0.516129
MF	GO:0016614	oxidoreductase activity, acting on CH-OH group of donors	41	0.452243	1.47507	0.00730584	0.0323749	0.0211108	2941	tags=63%, list=42%, signal=37%	AeUmb.PI554389.v2.6U.G0750900/AeUmb.PI554389.v2.4U.G0487000/AeUmb.PI554389.v2.3U.G0222600/AeUmb.PI554389.v2.4U.G0063100/AeUmb.PI554389.v2.7U.G1073900/AeUmb.PI554389.v2.7U.G0157700/AeUmb.PI554389.v2.7U.G0125000/AeUmb.PI554389.v2.1U.G0585700/AeUmb.PI554389.v2.6U.G0157400/AeUmb.PI554389.v2.5U.G0295100/AeUmb.PI554389.v2.5U.G0693200/AeUmb.PI554389.v2.2U.G0831500/AeUmb.PI554389.v2.6U.G0237300/AeUmb.PI5…	26	0.634146
BP	GO:0044282	small molecule catabolic process	10	0.640542	1.64914	0.00738126	0.0324967	0.0211902	2101	tags=80%, list=30%, signal=56%	AeUmb.PI554389.v2.5U.G0304100/AeUmb.PI554389.v2.6U.G0324900/AeUmb.PI554389.v2.3U.G0344500/AeUmb.PI554389.v2.5U.G0433000/AeUmb.PI554389.v2.2U.G0513200/AeUmb.PI554389.v2.3U.G0596600/AeUmb.PI554389.v2.7U.G0719600/AeUmb.PI554389.v2.6U.G0613200	8	0.8
CC	GO:0098798	mitochondrial protein-containing complex	16	0.56597	1.61194	0.00749564	0.0327874	0.0213797	2648	tags=88%, list=37%, signal=55%	AeUmb.PI554389.v2.5U.G0353800/AeUmb.PI554389.v2.6U.G0188600/AeUmb.PI554389.v2.7U.G0988100/AeUmb.PI554389.v2.5U.G0237400/AeUmb.PI554389.v2.5U.G0692000/AeUmb.PI554389.v2.4U.G0374900/AeUmb.PI554389.v2.2U.G0030200/AeUmb.PI554389.v2.1U.G0299400/AeUmb.PI554389.v2.7U.G0143200/AeUmb.PI554389.v2.1U.G0423600/AeUmb.PI554389.v2.4U.G0932400/AeUmb.PI554389.v2.2U.G0229100/AeUmb.PI554389.v2.3U.G0283900/AeUmb.PI5…	14	0.875
CC	GO:0034357	photosynthetic membrane	45	0.441191	1.45374	0.00780312	0.0339136	0.0221141	3498	tags=82%, list=49%, signal=42%	AeUmb.PI554389.v2.6U.G0016400/AeUmb.PI554389.v2.5U.G0704500/AeUmb.PI554389.v2.5U.G0319600/AeUmb.PI554389.v2.4U.G0771900/AeUmb.PI554389.v2.4U.G0862600/AeUmb.PI554389.v2.3U.G0327300/AeUmb.PI554389.v2.2U.G0273000/AeUmb.PI554389.v2.5U.G0820100/AeUmb.PI554389.v2.2U.G0195300/AeUmb.PI554389.v2.5U.G0216700/AeUmb.PI554389.v2.7U.G0086200/AeUmb.PI554389.v2.2U.G0191900/AeUmb.PI554389.v2.5U.G0784700/AeUmb.PI5…	37	0.822222
BP	GO:0071840	cellular component organization or biogenesis	198	0.33846	1.24716	0.00789921	0.0341125	0.0222438	2783	tags=52%, list=39%, signal=32%	AeUmb.PI554389.v2.4U.G0160900/AeUmb.PI554389.v2.4U.G0131200/AeUmb.PI554389.v2.7U.G0081800/AeUmb.PI554389.v2.6U.G0763700/AeUmb.PI554389.v2.2U.G0108900/AeUmb.PI554389.v2.5U.G0313500/AeUmb.PI554389.v2.4U.G0644300/AeUmb.PI554389.v2.4U.G0912600/AeUmb.PI554389.v2.2U.G0069900/AeUmb.PI554389.v2.4U.G0028600/AeUmb.PI554389.v2.4U.G0267400/AeUmb.PI554389.v2.5U.G0253800/AeUmb.PI554389.v2.2U.G0646100/AeUmb.PI5…	102	0.515152
BP	GO:0016071	mRNA metabolic process	52	0.424782	1.42168	0.00810162	0.0347652	0.0226694	3083	tags=73%, list=44%, signal=42%	AeUmb.PI554389.v2.1U.G0269200/AeUmb.PI554389.v2.2U.G0785400/AeUmb.PI554389.v2.4U.G0131200/AeUmb.PI554389.v2.2U.G0276900/AeUmb.PI554389.v2.6U.G0181400/AeUmb.PI554389.v2.5U.G0718400/AeUmb.PI554389.v2.2U.G0069900/AeUmb.PI554389.v2.3U.G0400600/AeUmb.PI554389.v2.7U.G0066800/AeUmb.PI554389.v2.7U.G0177800/AeUmb.PI554389.v2.2U.G0310100/AeUmb.PI554389.v2.3U.G0122500/AeUmb.PI554389.v2.6U.G0426800/AeUmb.PI5…	38	0.730769
CC	GO:0044391	ribosomal subunit	21	0.529375	1.57981	0.00817769	0.0348709	0.0227384	1677	tags=62%, list=24%, signal=47%	AeUmb.PI554389.v2.4U.G0950700/AeUmb.PI554389.v2.6U.G0142700/AeUmb.PI554389.v2.5U.G0673700/AeUmb.PI554389.v2.7U.G0906600/AeUmb.PI554389.v2.7U.G0122700/AeUmb.PI554389.v2.2U.G0178000/AeUmb.PI554389.v2.3U.G0044200/AeUmb.PI554389.v2.1U.G0027300/AeUmb.PI554389.v2.1U.G0494600/AeUmb.PI554389.v2.2U.G0068500/AeUmb.PI554389.v2.2U.G0210200/AeUmb.PI554389.v2.2U.G0046600/AeUmb.PI554389.v2.7U.G0165100	13	0.619048
MF	GO:0022836	gated channel activity	16	0.561114	1.59811	0.00831708	0.0350247	0.0228387	422	tags=38%, list=6%, signal=35%	AeUmb.PI554389.v2.1U.G0067500/AeUmb.PI554389.v2.1U.G0460500/AeUmb.PI554389.v2.5U.G0335400/AeUmb.PI554389.v2.6U.G0017900/AeUmb.PI554389.v2.5U.G0855500/AeUmb.PI554389.v2.2U.G0495500	6	0.375
MF	GO:0035639	purine ribonucleoside triphosphate binding	481	0.305858	1.16665	0.00829917	0.0350247	0.0228387	3084	tags=51%, list=44%, signal=31%	AeUmb.PI554389.v2.7U.G0637700/AeUmb.PI554389.v2.7U.G0140200/AeUmb.PI554389.v2.2U.G0785400/AeUmb.PI554389.v2.6U.G0312800/AeUmb.PI554389.v2.7U.G0557000/AeUmb.PI554389.v2.4U.G0060400/AeUmb.PI554389.v2.2U.G0743100/AeUmb.PI554389.v2.2U.G0109400/AeUmb.PI554389.v2.7U.G0273700/AeUmb.PI554389.v2.1U.G0325500/AeUmb.PI554389.v2.7U.G0278000/AeUmb.PI554389.v2.2U.G0569200/AeUmb.PI554389.v2.5U.G0393900/AeUmb.PI5…	246	0.511435
BP	GO:0033036	macromolecule localization	55	0.420171	1.41357	0.0085	0.0353558	0.0230546	2478	tags=60%, list=35%, signal=39%	AeUmb.PI554389.v2.3U.G0110600/AeUmb.PI554389.v2.6U.G0195800/AeUmb.PI554389.v2.6U.G0585700/AeUmb.PI554389.v2.4U.G0155600/AeUmb.PI554389.v2.7U.G0527300/AeUmb.PI554389.v2.6U.G0188600/AeUmb.PI554389.v2.3U.G0074500/AeUmb.PI554389.v2.3U.G0157800/AeUmb.PI554389.v2.6U.G0239900/AeUmb.PI554389.v2.4U.G0939600/AeUmb.PI554389.v2.7U.G0988100/AeUmb.PI554389.v2.2U.G0471200/AeUmb.PI554389.v2.5U.G0718300/AeUmb.PI5…	33	0.6
MF	GO:0017111	ribonucleoside triphosphate phosphatase activity	115	0.368041	1.31494	0.00849915	0.0353558	0.0230546	1360	tags=36%, list=19%, signal=29%	AeUmb.PI554389.v2.6U.G0312800/AeUmb.PI554389.v2.7U.G0557000/AeUmb.PI554389.v2.4U.G0060400/AeUmb.PI554389.v2.2U.G0743100/AeUmb.PI554389.v2.7U.G0278000/AeUmb.PI554389.v2.2U.G0569200/AeUmb.PI554389.v2.4U.G0524900/AeUmb.PI554389.v2.6U.G0195800/AeUmb.PI554389.v2.1U.G0275500/AeUmb.PI554389.v2.4U.G0028600/AeUmb.PI554389.v2.1U.G0550500/AeUmb.PI554389.v2.2U.G0302800/AeUmb.PI554389.v2.5U.G0264100/AeUmb.PI5…	41	0.356522
BP	GO:0008610	lipid biosynthetic process	48	0.42936	1.42384	0.0090027	0.0372185	0.0242692	3093	tags=69%, list=44%, signal=39%	AeUmb.PI554389.v2.2U.G0138100/AeUmb.PI554389.v2.3U.G0383600/AeUmb.PI554389.v2.7U.G1073900/AeUmb.PI554389.v2.6U.G0373100/AeUmb.PI554389.v2.5U.G0913900/AeUmb.PI554389.v2.2U.G0571600/AeUmb.PI554389.v2.5U.G0268200/AeUmb.PI554389.v2.6U.G0473800/AeUmb.PI554389.v2.3U.G0179600/AeUmb.PI554389.v2.3U.G0619900/AeUmb.PI554389.v2.1U.G0167100/AeUmb.PI554389.v2.6U.G0222800/AeUmb.PI554389.v2.5U.G0192300/AeUmb.PI5…	33	0.6875
CC	GO:0009523	photosystem II	22	0.516206	1.55106	0.0090671	0.0372575	0.0242946	3235	tags=82%, list=46%, signal=45%	AeUmb.PI554389.v2.4U.G0771900/AeUmb.PI554389.v2.2U.G0273000/AeUmb.PI554389.v2.7U.G0086200/AeUmb.PI554389.v2.2U.G0191900/AeUmb.PI554389.v2.5U.G0784700/AeUmb.PI554389.v2.2U.G0139500/AeUmb.PI554389.v2.6U.G0089000/AeUmb.PI554389.v2.6U.G0326700/AeUmb.PI554389.v2.7U.G0194500/AeUmb.PI554389.v2.5U.G0665300/AeUmb.PI554389.v2.2U.G0690700/AeUmb.PI554389.v2.2U.G0374200/AeUmb.PI554389.v2.2U.G0191100/AeUmb.PI5…	18	0.818182
MF	GO:0016616	oxidoreductase activity, acting on the CH-OH group of donors, NAD or NADP as acceptor	35	0.462741	1.48204	0.00921105	0.037621	0.0245317	2941	tags=71%, list=42%, signal=42%	AeUmb.PI554389.v2.6U.G0750900/AeUmb.PI554389.v2.4U.G0487000/AeUmb.PI554389.v2.3U.G0222600/AeUmb.PI554389.v2.4U.G0063100/AeUmb.PI554389.v2.7U.G1073900/AeUmb.PI554389.v2.7U.G0157700/AeUmb.PI554389.v2.7U.G0125000/AeUmb.PI554389.v2.1U.G0585700/AeUmb.PI554389.v2.6U.G0157400/AeUmb.PI554389.v2.5U.G0295100/AeUmb.PI554389.v2.5U.G0693200/AeUmb.PI554389.v2.2U.G0831500/AeUmb.PI554389.v2.6U.G0237300/AeUmb.PI5…	25	0.714286
CC	GO:0009521	photosystem	36	0.459664	1.47742	0.00940941	0.0382011	0.0249099	3249	tags=81%, list=46%, signal=44%	AeUmb.PI554389.v2.5U.G0704500/AeUmb.PI554389.v2.4U.G0771900/AeUmb.PI554389.v2.4U.G0862600/AeUmb.PI554389.v2.2U.G0273000/AeUmb.PI554389.v2.5U.G0820100/AeUmb.PI554389.v2.2U.G0195300/AeUmb.PI554389.v2.7U.G0086200/AeUmb.PI554389.v2.2U.G0191900/AeUmb.PI554389.v2.5U.G0784700/AeUmb.PI554389.v2.2U.G0683900/AeUmb.PI554389.v2.5U.G0777800/AeUmb.PI554389.v2.2U.G0139500/AeUmb.PI554389.v2.6U.G0089000/AeUmb.PI5…	29	0.805556
MF	GO:0004527	exonuclease activity	10	0.626203	1.61222	0.0104835	0.0420582	0.027425	1269	tags=50%, list=18%, signal=41%	AeUmb.PI554389.v2.6U.G0694800/AeUmb.PI554389.v2.6U.G0176500/AeUmb.PI554389.v2.2U.G0888600/AeUmb.PI554389.v2.2U.G0222200/AeUmb.PI554389.v2.2U.G0512900	5	0.5
MF	GO:0008408	3'-5' exonuclease activity	10	0.626203	1.61222	0.0104835	0.0420582	0.027425	1269	tags=50%, list=18%, signal=41%	AeUmb.PI554389.v2.6U.G0694800/AeUmb.PI554389.v2.6U.G0176500/AeUmb.PI554389.v2.2U.G0888600/AeUmb.PI554389.v2.2U.G0222200/AeUmb.PI554389.v2.2U.G0512900	5	0.5
MF	GO:0004176	ATP-dependent peptidase activity	19	0.534617	1.56953	0.0108585	0.043063	0.0280802	2380	tags=63%, list=34%, signal=42%	AeUmb.PI554389.v2.7U.G0293800/AeUmb.PI554389.v2.1U.G0364000/AeUmb.PI554389.v2.2U.G0370300/AeUmb.PI554389.v2.6U.G0502100/AeUmb.PI554389.v2.7U.G0456900/AeUmb.PI554389.v2.3U.G0150500/AeUmb.PI554389.v2.2U.G0715200/AeUmb.PI554389.v2.3U.G0375700/AeUmb.PI554389.v2.4U.G0017600/AeUmb.PI554389.v2.4U.G1019900/AeUmb.PI554389.v2.6U.G0333800/AeUmb.PI554389.v2.6U.G0402600	12	0.631579
CC	GO:0005667	transcription regulator complex	20	0.528075	1.56474	0.0109245	0.043063	0.0280802	2448	tags=80%, list=35%, signal=52%	AeUmb.PI554389.v2.7U.G0179100/AeUmb.PI554389.v2.1U.G0557300/AeUmb.PI554389.v2.3U.G0390700/AeUmb.PI554389.v2.7U.G0005100/AeUmb.PI554389.v2.2U.G0070800/AeUmb.PI554389.v2.3U.G0464000/AeUmb.PI554389.v2.1U.G0269700/AeUmb.PI554389.v2.1U.G0399700/AeUmb.PI554389.v2.3U.G0364100/AeUmb.PI554389.v2.1U.G0014200/AeUmb.PI554389.v2.4U.G0236100/AeUmb.PI554389.v2.5U.G0094300/AeUmb.PI554389.v2.3U.G0220300/AeUmb.PI5…	16	0.8
BP	GO:1901605	alpha-amino acid metabolic process	35	0.458419	1.4682	0.0109131	0.043063	0.0280802	2101	tags=57%, list=30%, signal=40%	AeUmb.PI554389.v2.5U.G0304100/AeUmb.PI554389.v2.4U.G0487000/AeUmb.PI554389.v2.7U.G0808300/AeUmb.PI554389.v2.4U.G0171200/AeUmb.PI554389.v2.2U.G0403600/AeUmb.PI554389.v2.4U.G0872900/AeUmb.PI554389.v2.6U.G0286000/AeUmb.PI554389.v2.3U.G0409200/AeUmb.PI554389.v2.2U.G0591000/AeUmb.PI554389.v2.5U.G0886600/AeUmb.PI554389.v2.5U.G0433000/AeUmb.PI554389.v2.7U.G0342300/AeUmb.PI554389.v2.6U.G0170300/AeUmb.PI5…	20	0.571429
MF	GO:0016859	cis-trans isomerase activity	18	0.537716	1.5642	0.0116019	0.0452906	0.0295327	3162	tags=89%, list=45%, signal=49%	AeUmb.PI554389.v2.7U.G0100600/AeUmb.PI554389.v2.2U.G0118600/AeUmb.PI554389.v2.5U.G0449000/AeUmb.PI554389.v2.2U.G0812400/AeUmb.PI554389.v2.1U.G0167100/AeUmb.PI554389.v2.2U.G0177100/AeUmb.PI554389.v2.4U.G0660800/AeUmb.PI554389.v2.7U.G1062100/AeUmb.PI554389.v2.2U.G0805500/AeUmb.PI554389.v2.3U.G0179800/AeUmb.PI554389.v2.2U.G0553300/AeUmb.PI554389.v2.2U.G0893800/AeUmb.PI554389.v2.4U.G0835900/AeUmb.PI5…	16	0.888889
BP	GO:0034220	monoatomic ion transmembrane transport	30	0.473935	1.48922	0.0116232	0.0452906	0.0295327	2225	tags=57%, list=31%, signal=39%	AeUmb.PI554389.v2.7U.G0273700/AeUmb.PI554389.v2.3U.G0195000/AeUmb.PI554389.v2.2U.G0463900/AeUmb.PI554389.v2.5U.G0335400/AeUmb.PI554389.v2.3U.G0224900/AeUmb.PI554389.v2.6U.G0017900/AeUmb.PI554389.v2.1U.G0226300/AeUmb.PI554389.v2.5U.G0855500/AeUmb.PI554389.v2.2U.G0158700/AeUmb.PI554389.v2.2U.G0439700/AeUmb.PI554389.v2.4U.G0792100/AeUmb.PI554389.v2.Un.G0049900/AeUmb.PI554389.v2.5U.G0179400/AeUmb.PI5…	17	0.566667
BP	GO:0043412	macromolecule modification	457	0.305577	1.16371	0.0116988	0.0453246	0.0295549	3841	tags=65%, list=54%, signal=32%	AeUmb.PI554389.v2.7U.G0637700/AeUmb.PI554389.v2.7U.G0140200/AeUmb.PI554389.v2.2U.G0785400/AeUmb.PI554389.v2.7U.G0048700/AeUmb.PI554389.v2.2U.G0630400/AeUmb.PI554389.v2.5U.G0726200/AeUmb.PI554389.v2.2U.G0109400/AeUmb.PI554389.v2.1U.G0394300/AeUmb.PI554389.v2.3U.G0424000/AeUmb.PI554389.v2.4U.G1003400/AeUmb.PI554389.v2.7U.G1029900/AeUmb.PI554389.v2.2U.G0215000/AeUmb.PI554389.v2.7U.G0583300/AeUmb.PI5…	298	0.652079
BP	GO:0009150	purine ribonucleotide metabolic process	31	0.468823	1.4786	0.0120216	0.0463106	0.0301979	2877	tags=74%, list=41%, signal=44%	AeUmb.PI554389.v2.6U.G0611800/AeUmb.PI554389.v2.7U.G0273700/AeUmb.PI554389.v2.7U.G0926800/AeUmb.PI554389.v2.5U.G0393900/AeUmb.PI554389.v2.2U.G0170900/AeUmb.PI554389.v2.1U.G0223100/AeUmb.PI554389.v2.1U.G0533700/AeUmb.PI554389.v2.5U.G0206200/AeUmb.PI554389.v2.4U.G0929100/AeUmb.PI554389.v2.1U.G0270500/AeUmb.PI554389.v2.1U.G0391100/AeUmb.PI554389.v2.2U.G0152300/AeUmb.PI554389.v2.3U.G0601600/AeUmb.PI5…	23	0.741935
MF	GO:0016835	carbon-oxygen lyase activity	21	0.515449	1.53825	0.0127208	0.0487273	0.0317738	1845	tags=52%, list=26%, signal=39%	AeUmb.PI554389.v2.4U.G0681800/AeUmb.PI554389.v2.3U.G0228900/AeUmb.PI554389.v2.2U.G0403600/AeUmb.PI554389.v2.6U.G0286000/AeUmb.PI554389.v2.2U.G0591000/AeUmb.PI554389.v2.2U.G0257200/AeUmb.PI554389.v2.7U.G0353000/AeUmb.PI554389.v2.3U.G0213300/AeUmb.PI554389.v2.6U.G0157100/AeUmb.PI554389.v2.2U.G0647200/AeUmb.PI554389.v2.2U.G0868900	11	0.52381
BP	GO:0022613	ribonucleoprotein complex biogenesis	41	0.436726	1.42446	0.0129103	0.0491753	0.0320659	1446	tags=49%, list=20%, signal=39%	AeUmb.PI554389.v2.4U.G0131200/AeUmb.PI554389.v2.7U.G0081800/AeUmb.PI554389.v2.2U.G0069900/AeUmb.PI554389.v2.5U.G0437800/AeUmb.PI554389.v2.6U.G0176500/AeUmb.PI554389.v2.2U.G0039500/AeUmb.PI554389.v2.2U.G0212100/AeUmb.PI554389.v2.5U.G0370400/AeUmb.PI554389.v2.7U.G0113100/AeUmb.PI554389.v2.2U.G0569000/AeUmb.PI554389.v2.6U.G0426800/AeUmb.PI554389.v2.7U.G0122700/AeUmb.PI554389.v2.6U.G0363200/AeUmb.PI5…	20	0.487805
CC	GO:0090575	RNA polymerase II transcription regulator complex	16	0.544473	1.55071	0.0130404	0.0493931	0.0322079	2448	tags=81%, list=35%, signal=53%	AeUmb.PI554389.v2.7U.G0179100/AeUmb.PI554389.v2.1U.G0557300/AeUmb.PI554389.v2.3U.G0390700/AeUmb.PI554389.v2.2U.G0070800/AeUmb.PI554389.v2.3U.G0464000/AeUmb.PI554389.v2.3U.G0364100/AeUmb.PI554389.v2.1U.G0014200/AeUmb.PI554389.v2.4U.G0236100/AeUmb.PI554389.v2.5U.G0094300/AeUmb.PI554389.v2.3U.G0220300/AeUmb.PI554389.v2.7U.G1021600/AeUmb.PI554389.v2.6U.G0526000/AeUmb.PI554389.v2.4U.G0689500	13	0.8125

## Sheet: U89I24_vs_U17I24_Up
ONTOLOGY	ID	Description	setSize	enrichmentScore	NES	pvalue	p.adjust	qvalue	rank	leading_edge	core_enrichment	CoreGeneCount	GeneRatio
CC	GO:0030117	membrane coat	27	-0.582797	-2.94931	3.38259e-08	1.05537e-05	9.79171e-06	3462	tags=100%, list=42%, signal=58%	AeUmb.PI554389.v2.4U.G0924400/AeUmb.PI554389.v2.1U.G0302600/AeUmb.PI554389.v2.7U.G0681800/AeUmb.PI554389.v2.3U.G0139200/AeUmb.PI554389.v2.4U.G0838800/AeUmb.PI554389.v2.6U.G0233500/AeUmb.PI554389.v2.3U.G0735900/AeUmb.PI554389.v2.2U.G0886600/AeUmb.PI554389.v2.4U.G0976200/AeUmb.PI554389.v2.3U.G0207100/AeUmb.PI554389.v2.3U.G0139600/AeUmb.PI554389.v2.6U.G0387400/AeUmb.PI554389.v2.6U.G0016800/AeUmb.PI5…	26	0.962963
CC	GO:0048475	coated membrane	27	-0.582797	-2.94931	3.38259e-08	1.05537e-05	9.79171e-06	3462	tags=100%, list=42%, signal=58%	AeUmb.PI554389.v2.4U.G0924400/AeUmb.PI554389.v2.1U.G0302600/AeUmb.PI554389.v2.7U.G0681800/AeUmb.PI554389.v2.3U.G0139200/AeUmb.PI554389.v2.4U.G0838800/AeUmb.PI554389.v2.6U.G0233500/AeUmb.PI554389.v2.3U.G0735900/AeUmb.PI554389.v2.2U.G0886600/AeUmb.PI554389.v2.4U.G0976200/AeUmb.PI554389.v2.3U.G0207100/AeUmb.PI554389.v2.3U.G0139600/AeUmb.PI554389.v2.6U.G0387400/AeUmb.PI554389.v2.6U.G0016800/AeUmb.PI5…	26	0.962963
MF	GO:0008135	translation factor activity, RNA binding	30	-0.511076	-2.88101	2.35678e-07	2.94126e-05	2.7289e-05	2888	tags=93%, list=35%, signal=61%	AeUmb.PI554389.v2.3U.G0593300/AeUmb.PI554389.v2.6U.G0105100/AeUmb.PI554389.v2.3U.G0078500/AeUmb.PI554389.v2.7U.G0301800/AeUmb.PI554389.v2.5U.G0706200/AeUmb.PI554389.v2.6U.G0287200/AeUmb.PI554389.v2.2U.G0342100/AeUmb.PI554389.v2.5U.G0961100/AeUmb.PI554389.v2.4U.G0944600/AeUmb.PI554389.v2.4U.G0076900/AeUmb.PI554389.v2.6U.G0688400/AeUmb.PI554389.v2.2U.G0826700/AeUmb.PI554389.v2.5U.G0385000/AeUmb.PI5…	28	0.933333
MF	GO:0045182	translation regulator activity	30	-0.511076	-2.88101	2.35678e-07	2.94126e-05	2.7289e-05	2888	tags=93%, list=35%, signal=61%	AeUmb.PI554389.v2.3U.G0593300/AeUmb.PI554389.v2.6U.G0105100/AeUmb.PI554389.v2.3U.G0078500/AeUmb.PI554389.v2.7U.G0301800/AeUmb.PI554389.v2.5U.G0706200/AeUmb.PI554389.v2.6U.G0287200/AeUmb.PI554389.v2.2U.G0342100/AeUmb.PI554389.v2.5U.G0961100/AeUmb.PI554389.v2.4U.G0944600/AeUmb.PI554389.v2.4U.G0076900/AeUmb.PI554389.v2.6U.G0688400/AeUmb.PI554389.v2.2U.G0826700/AeUmb.PI554389.v2.5U.G0385000/AeUmb.PI5…	28	0.933333
MF	GO:0090079	translation regulator activity, nucleic acid binding	30	-0.511076	-2.88101	2.35678e-07	2.94126e-05	2.7289e-05	2888	tags=93%, list=35%, signal=61%	AeUmb.PI554389.v2.3U.G0593300/AeUmb.PI554389.v2.6U.G0105100/AeUmb.PI554389.v2.3U.G0078500/AeUmb.PI554389.v2.7U.G0301800/AeUmb.PI554389.v2.5U.G0706200/AeUmb.PI554389.v2.6U.G0287200/AeUmb.PI554389.v2.2U.G0342100/AeUmb.PI554389.v2.5U.G0961100/AeUmb.PI554389.v2.4U.G0944600/AeUmb.PI554389.v2.4U.G0076900/AeUmb.PI554389.v2.6U.G0688400/AeUmb.PI554389.v2.2U.G0826700/AeUmb.PI554389.v2.5U.G0385000/AeUmb.PI5…	28	0.933333
CC	GO:0031410	cytoplasmic vesicle	22	-0.582443	-2.76262	9.93032e-07	6.88502e-05	6.38792e-05	3462	tags=100%, list=42%, signal=58%	AeUmb.PI554389.v2.4U.G0924400/AeUmb.PI554389.v2.1U.G0302600/AeUmb.PI554389.v2.3U.G0139200/AeUmb.PI554389.v2.2U.G0769700/AeUmb.PI554389.v2.4U.G0838800/AeUmb.PI554389.v2.6U.G0233500/AeUmb.PI554389.v2.2U.G0886600/AeUmb.PI554389.v2.4U.G0976200/AeUmb.PI554389.v2.3U.G0139600/AeUmb.PI554389.v2.6U.G0016800/AeUmb.PI554389.v2.5U.G0284700/AeUmb.PI554389.v2.5U.G0913700/AeUmb.PI554389.v2.3U.G0149400/AeUmb.PI5…	21	0.954545
CC	GO:0031982	vesicle	22	-0.582443	-2.76262	9.93032e-07	6.88502e-05	6.38792e-05	3462	tags=100%, list=42%, signal=58%	AeUmb.PI554389.v2.4U.G0924400/AeUmb.PI554389.v2.1U.G0302600/AeUmb.PI554389.v2.3U.G0139200/AeUmb.PI554389.v2.2U.G0769700/AeUmb.PI554389.v2.4U.G0838800/AeUmb.PI554389.v2.6U.G0233500/AeUmb.PI554389.v2.2U.G0886600/AeUmb.PI554389.v2.4U.G0976200/AeUmb.PI554389.v2.3U.G0139600/AeUmb.PI554389.v2.6U.G0016800/AeUmb.PI554389.v2.5U.G0284700/AeUmb.PI554389.v2.5U.G0913700/AeUmb.PI554389.v2.3U.G0149400/AeUmb.PI5…	21	0.954545
CC	GO:0097708	intracellular vesicle	22	-0.582443	-2.76262	9.93032e-07	6.88502e-05	6.38792e-05	3462	tags=100%, list=42%, signal=58%	AeUmb.PI554389.v2.4U.G0924400/AeUmb.PI554389.v2.1U.G0302600/AeUmb.PI554389.v2.3U.G0139200/AeUmb.PI554389.v2.2U.G0769700/AeUmb.PI554389.v2.4U.G0838800/AeUmb.PI554389.v2.6U.G0233500/AeUmb.PI554389.v2.2U.G0886600/AeUmb.PI554389.v2.4U.G0976200/AeUmb.PI554389.v2.3U.G0139600/AeUmb.PI554389.v2.6U.G0016800/AeUmb.PI554389.v2.5U.G0284700/AeUmb.PI554389.v2.5U.G0913700/AeUmb.PI554389.v2.3U.G0149400/AeUmb.PI5…	21	0.954545
CC	GO:0005794	Golgi apparatus	20	-0.591664	-2.67583	8.14361e-07	6.88502e-05	6.38792e-05	2583	tags=95%, list=31%, signal=65%	AeUmb.PI554389.v2.1U.G0302600/AeUmb.PI554389.v2.3U.G0427800/AeUmb.PI554389.v2.3U.G0139200/AeUmb.PI554389.v2.2U.G0769700/AeUmb.PI554389.v2.4U.G0838800/AeUmb.PI554389.v2.2U.G0332900/AeUmb.PI554389.v2.6U.G0233500/AeUmb.PI554389.v2.7U.G0456500/AeUmb.PI554389.v2.3U.G0311600/AeUmb.PI554389.v2.6U.G0228000/AeUmb.PI554389.v2.4U.G0976200/AeUmb.PI554389.v2.3U.G0139600/AeUmb.PI554389.v2.6U.G0016800/AeUmb.PI5…	19	0.95
CC	GO:0030135	coated vesicle	20	-0.582302	-2.63349	1.25298e-06	7.81858e-05	7.25408e-05	3462	tags=100%, list=42%, signal=58%	AeUmb.PI554389.v2.4U.G0924400/AeUmb.PI554389.v2.1U.G0302600/AeUmb.PI554389.v2.3U.G0139200/AeUmb.PI554389.v2.4U.G0838800/AeUmb.PI554389.v2.6U.G0233500/AeUmb.PI554389.v2.2U.G0886600/AeUmb.PI554389.v2.4U.G0976200/AeUmb.PI554389.v2.3U.G0139600/AeUmb.PI554389.v2.6U.G0016800/AeUmb.PI554389.v2.5U.G0284700/AeUmb.PI554389.v2.5U.G0913700/AeUmb.PI554389.v2.3U.G0149400/AeUmb.PI554389.v2.1U.G0430000/AeUmb.PI5…	19	0.95
CC	GO:0012506	vesicle membrane	19	-0.582231	-2.54462	2.276e-06	0.000101445	9.41204e-05	3462	tags=100%, list=42%, signal=58%	AeUmb.PI554389.v2.4U.G0924400/AeUmb.PI554389.v2.1U.G0302600/AeUmb.PI554389.v2.3U.G0139200/AeUmb.PI554389.v2.4U.G0838800/AeUmb.PI554389.v2.6U.G0233500/AeUmb.PI554389.v2.2U.G0886600/AeUmb.PI554389.v2.4U.G0976200/AeUmb.PI554389.v2.3U.G0139600/AeUmb.PI554389.v2.6U.G0016800/AeUmb.PI554389.v2.5U.G0284700/AeUmb.PI554389.v2.5U.G0913700/AeUmb.PI554389.v2.3U.G0149400/AeUmb.PI554389.v2.1U.G0430000/AeUmb.PI5…	18	0.947368
CC	GO:0030120	vesicle coat	19	-0.582231	-2.54462	2.276e-06	0.000101445	9.41204e-05	3462	tags=100%, list=42%, signal=58%	AeUmb.PI554389.v2.4U.G0924400/AeUmb.PI554389.v2.1U.G0302600/AeUmb.PI554389.v2.3U.G0139200/AeUmb.PI554389.v2.4U.G0838800/AeUmb.PI554389.v2.6U.G0233500/AeUmb.PI554389.v2.2U.G0886600/AeUmb.PI554389.v2.4U.G0976200/AeUmb.PI554389.v2.3U.G0139600/AeUmb.PI554389.v2.6U.G0016800/AeUmb.PI554389.v2.5U.G0284700/AeUmb.PI554389.v2.5U.G0913700/AeUmb.PI554389.v2.3U.G0149400/AeUmb.PI554389.v2.1U.G0430000/AeUmb.PI5…	18	0.947368
CC	GO:0030659	cytoplasmic vesicle membrane	19	-0.582231	-2.54462	2.276e-06	0.000101445	9.41204e-05	3462	tags=100%, list=42%, signal=58%	AeUmb.PI554389.v2.4U.G0924400/AeUmb.PI554389.v2.1U.G0302600/AeUmb.PI554389.v2.3U.G0139200/AeUmb.PI554389.v2.4U.G0838800/AeUmb.PI554389.v2.6U.G0233500/AeUmb.PI554389.v2.2U.G0886600/AeUmb.PI554389.v2.4U.G0976200/AeUmb.PI554389.v2.3U.G0139600/AeUmb.PI554389.v2.6U.G0016800/AeUmb.PI554389.v2.5U.G0284700/AeUmb.PI554389.v2.5U.G0913700/AeUmb.PI554389.v2.3U.G0149400/AeUmb.PI554389.v2.1U.G0430000/AeUmb.PI5…	18	0.947368
CC	GO:0030662	coated vesicle membrane	19	-0.582231	-2.54462	2.276e-06	0.000101445	9.41204e-05	3462	tags=100%, list=42%, signal=58%	AeUmb.PI554389.v2.4U.G0924400/AeUmb.PI554389.v2.1U.G0302600/AeUmb.PI554389.v2.3U.G0139200/AeUmb.PI554389.v2.4U.G0838800/AeUmb.PI554389.v2.6U.G0233500/AeUmb.PI554389.v2.2U.G0886600/AeUmb.PI554389.v2.4U.G0976200/AeUmb.PI554389.v2.3U.G0139600/AeUmb.PI554389.v2.6U.G0016800/AeUmb.PI554389.v2.5U.G0284700/AeUmb.PI554389.v2.5U.G0913700/AeUmb.PI554389.v2.3U.G0149400/AeUmb.PI554389.v2.1U.G0430000/AeUmb.PI5…	18	0.947368
MF	GO:0051082	unfolded protein binding	21	-0.535511	-2.49769	1.44512e-05	0.000601171	0.000557766	3848	tags=100%, list=47%, signal=54%	AeUmb.PI554389.v2.4U.G0409100/AeUmb.PI554389.v2.4U.G0301700/AeUmb.PI554389.v2.4U.G0716400/AeUmb.PI554389.v2.7U.G0538300/AeUmb.PI554389.v2.5U.G0442600/AeUmb.PI554389.v2.5U.G0454600/AeUmb.PI554389.v2.6U.G0772900/AeUmb.PI554389.v2.6U.G0342200/AeUmb.PI554389.v2.4U.G0717000/AeUmb.PI554389.v2.7U.G0228300/AeUmb.PI554389.v2.5U.G0218700/AeUmb.PI554389.v2.5U.G0207800/AeUmb.PI554389.v2.4U.G1020300/AeUmb.PI5…	20	0.952381
BP	GO:0042254	ribosome biogenesis	28	-0.450425	-2.27773	1.9115e-05	0.000745484	0.00069166	4552	tags=100%, list=55%, signal=45%	AeUmb.PI554389.v2.4U.G1030000/AeUmb.PI554389.v2.4U.G0079600/AeUmb.PI554389.v2.5U.G0710200/AeUmb.PI554389.v2.4U.G0656300/AeUmb.PI554389.v2.7U.G0001400/AeUmb.PI554389.v2.1U.G0156300/AeUmb.PI554389.v2.7U.G0468100/AeUmb.PI554389.v2.4U.G0399700/AeUmb.PI554389.v2.3U.G0336900/AeUmb.PI554389.v2.5U.G0769100/AeUmb.PI554389.v2.4U.G0447900/AeUmb.PI554389.v2.4U.G0596100/AeUmb.PI554389.v2.6U.G0326300/AeUmb.PI5…	27	0.964286
MF	GO:0003746	translation elongation factor activity	13	-0.651425	-2.42633	2.33591e-05	0.000857415	0.000795509	2888	tags=100%, list=35%, signal=65%	AeUmb.PI554389.v2.6U.G0105100/AeUmb.PI554389.v2.7U.G0301800/AeUmb.PI554389.v2.5U.G0706200/AeUmb.PI554389.v2.6U.G0287200/AeUmb.PI554389.v2.4U.G0944600/AeUmb.PI554389.v2.6U.G0287300/AeUmb.PI554389.v2.2U.G0386100/AeUmb.PI554389.v2.7U.G0438300/AeUmb.PI554389.v2.7U.G0246600/AeUmb.PI554389.v2.6U.G0451300/AeUmb.PI554389.v2.2U.G0067100/AeUmb.PI554389.v2.7U.G0273000	12	0.923077
BP	GO:0022613	ribonucleoprotein complex biogenesis	29	-0.45048	-2.39132	3.29929e-05	0.00114375	0.00106117	4552	tags=100%, list=55%, signal=45%	AeUmb.PI554389.v2.4U.G1030000/AeUmb.PI554389.v2.4U.G0079600/AeUmb.PI554389.v2.5U.G0710200/AeUmb.PI554389.v2.4U.G0656300/AeUmb.PI554389.v2.7U.G0001400/AeUmb.PI554389.v2.1U.G0156300/AeUmb.PI554389.v2.7U.G0468100/AeUmb.PI554389.v2.4U.G0399700/AeUmb.PI554389.v2.3U.G0336900/AeUmb.PI554389.v2.5U.G0769100/AeUmb.PI554389.v2.4U.G0447900/AeUmb.PI554389.v2.4U.G0596100/AeUmb.PI554389.v2.6U.G0326300/AeUmb.PI5…	28	0.965517
BP	GO:0008033	tRNA processing	15	-0.594201	-2.40876	6.0817e-05	0.00199736	0.00185315	3361	tags=100%, list=41%, signal=59%	AeUmb.PI554389.v2.6U.G0099600/AeUmb.PI554389.v2.4U.G1017100/AeUmb.PI554389.v2.5U.G0147300/AeUmb.PI554389.v2.4U.G0418900/AeUmb.PI554389.v2.6U.G0153000/AeUmb.PI554389.v2.2U.G0217300/AeUmb.PI554389.v2.3U.G0062000/AeUmb.PI554389.v2.1U.G0243000/AeUmb.PI554389.v2.7U.G0061100/AeUmb.PI554389.v2.1U.G0204600/AeUmb.PI554389.v2.6U.G0388500/AeUmb.PI554389.v2.3U.G0081600/AeUmb.PI554389.v2.3U.G0736300/AeUmb.PI5…	14	0.933333
BP	GO:0006400	tRNA modification	11	-0.649206	-2.25916	0.000279895	0.00873273	0.00810223	2905	tags=100%, list=35%, signal=65%	AeUmb.PI554389.v2.4U.G1017100/AeUmb.PI554389.v2.5U.G0147300/AeUmb.PI554389.v2.4U.G0418900/AeUmb.PI554389.v2.2U.G0217300/AeUmb.PI554389.v2.3U.G0062000/AeUmb.PI554389.v2.1U.G0243000/AeUmb.PI554389.v2.7U.G0061100/AeUmb.PI554389.v2.1U.G0204600/AeUmb.PI554389.v2.3U.G0736300/AeUmb.PI554389.v2.2U.G0269100	10	0.909091
CC	GO:0005798	Golgi-associated vesicle	13	-0.581807	-2.16703	0.00036616	0.00993409	0.00921685	3462	tags=100%, list=42%, signal=58%	AeUmb.PI554389.v2.1U.G0302600/AeUmb.PI554389.v2.3U.G0139200/AeUmb.PI554389.v2.4U.G0838800/AeUmb.PI554389.v2.6U.G0233500/AeUmb.PI554389.v2.4U.G0976200/AeUmb.PI554389.v2.3U.G0139600/AeUmb.PI554389.v2.6U.G0016800/AeUmb.PI554389.v2.5U.G0284700/AeUmb.PI554389.v2.5U.G0913700/AeUmb.PI554389.v2.1U.G0430000/AeUmb.PI554389.v2.6U.G0727700/AeUmb.PI554389.v2.7U.G0605900	12	0.923077
CC	GO:0030660	Golgi-associated vesicle membrane	13	-0.581807	-2.16703	0.00036616	0.00993409	0.00921685	3462	tags=100%, list=42%, signal=58%	AeUmb.PI554389.v2.1U.G0302600/AeUmb.PI554389.v2.3U.G0139200/AeUmb.PI554389.v2.4U.G0838800/AeUmb.PI554389.v2.6U.G0233500/AeUmb.PI554389.v2.4U.G0976200/AeUmb.PI554389.v2.3U.G0139600/AeUmb.PI554389.v2.6U.G0016800/AeUmb.PI554389.v2.5U.G0284700/AeUmb.PI554389.v2.5U.G0913700/AeUmb.PI554389.v2.1U.G0430000/AeUmb.PI554389.v2.6U.G0727700/AeUmb.PI554389.v2.7U.G0605900	12	0.923077
MF	GO:0043531	ADP binding	208	0.366274	1.3511	0.000344049	0.00993409	0.00921685	4350	tags=77%, list=53%, signal=38%	AeUmb.PI554389.v2.2U.G0863500/AeUmb.PI554389.v2.7U.G0825700/AeUmb.PI554389.v2.2U.G0863400/AeUmb.PI554389.v2.3U.G0580100/AeUmb.PI554389.v2.3U.G0546300/AeUmb.PI554389.v2.2U.G0520700/AeUmb.PI554389.v2.4U.G0215100/AeUmb.PI554389.v2.7U.G0833600/AeUmb.PI554389.v2.7U.G0759400/AeUmb.PI554389.v2.4U.G0033900/AeUmb.PI554389.v2.2U.G0006800/AeUmb.PI554389.v2.7U.G1052900/AeUmb.PI554389.v2.4U.G0215400/AeUmb.PI5…	161	0.774038
MF	GO:0003743	translation initiation factor activity	14	-0.527757	-2.049	0.000496593	0.0129114	0.0119792	1567	tags=93%, list=19%, signal=75%	AeUmb.PI554389.v2.3U.G0078500/AeUmb.PI554389.v2.2U.G0342100/AeUmb.PI554389.v2.5U.G0961100/AeUmb.PI554389.v2.4U.G0076900/AeUmb.PI554389.v2.6U.G0688400/AeUmb.PI554389.v2.2U.G0826700/AeUmb.PI554389.v2.5U.G0385000/AeUmb.PI554389.v2.7U.G0155200/AeUmb.PI554389.v2.5U.G0071800/AeUmb.PI554389.v2.2U.G0736800/AeUmb.PI554389.v2.2U.G0128100/AeUmb.PI554389.v2.4U.G1022700/AeUmb.PI554389.v2.5U.G0444300	13	0.928571
BP	GO:0044272	sulfur compound biosynthetic process	22	-0.426508	-2.02299	0.000782092	0.019521	0.0181116	3820	tags=95%, list=46%, signal=51%	AeUmb.PI554389.v2.4U.G0792300/AeUmb.PI554389.v2.3U.G0569100/AeUmb.PI554389.v2.5U.G0117900/AeUmb.PI554389.v2.6U.G0222900/AeUmb.PI554389.v2.1U.G0419900/AeUmb.PI554389.v2.5U.G0645800/AeUmb.PI554389.v2.4U.G0806300/AeUmb.PI554389.v2.5U.G0509400/AeUmb.PI554389.v2.5U.G0218900/AeUmb.PI554389.v2.4U.G0305700/AeUmb.PI554389.v2.7U.G0656900/AeUmb.PI554389.v2.7U.G0275700/AeUmb.PI554389.v2.5U.G0810800/AeUmb.PI5…	21	0.954545
BP	GO:0006888	endoplasmic reticulum to Golgi vesicle-mediated transport	15	-0.505399	-2.04877	0.000942566	0.0210057	0.0194891	4093	tags=93%, list=50%, signal=47%	AeUmb.PI554389.v2.4U.G0924400/AeUmb.PI554389.v2.4U.G0838800/AeUmb.PI554389.v2.7U.G0326700/AeUmb.PI554389.v2.2U.G0886600/AeUmb.PI554389.v2.7U.G0841600/AeUmb.PI554389.v2.2U.G0653300/AeUmb.PI554389.v2.3U.G0401800/AeUmb.PI554389.v2.4U.G0551700/AeUmb.PI554389.v2.3U.G0083600/AeUmb.PI554389.v2.5U.G0913700/AeUmb.PI554389.v2.3U.G0149400/AeUmb.PI554389.v2.4U.G1011100/AeUmb.PI554389.v2.6U.G0601000/AeUmb.PI5…	14	0.933333
BP	GO:0006364	rRNA processing	19	-0.449933	-1.96642	0.000921427	0.0210057	0.0194891	4552	tags=100%, list=55%, signal=45%	AeUmb.PI554389.v2.4U.G1030000/AeUmb.PI554389.v2.4U.G0079600/AeUmb.PI554389.v2.5U.G0710200/AeUmb.PI554389.v2.4U.G0656300/AeUmb.PI554389.v2.7U.G0001400/AeUmb.PI554389.v2.1U.G0156300/AeUmb.PI554389.v2.7U.G0468100/AeUmb.PI554389.v2.4U.G0399700/AeUmb.PI554389.v2.3U.G0336900/AeUmb.PI554389.v2.5U.G0769100/AeUmb.PI554389.v2.4U.G0447900/AeUmb.PI554389.v2.5U.G0742600/AeUmb.PI554389.v2.2U.G0143600/AeUmb.PI5…	18	0.947368
BP	GO:0016072	rRNA metabolic process	19	-0.449933	-1.96642	0.000921427	0.0210057	0.0194891	4552	tags=100%, list=55%, signal=45%	AeUmb.PI554389.v2.4U.G1030000/AeUmb.PI554389.v2.4U.G0079600/AeUmb.PI554389.v2.5U.G0710200/AeUmb.PI554389.v2.4U.G0656300/AeUmb.PI554389.v2.7U.G0001400/AeUmb.PI554389.v2.1U.G0156300/AeUmb.PI554389.v2.7U.G0468100/AeUmb.PI554389.v2.4U.G0399700/AeUmb.PI554389.v2.3U.G0336900/AeUmb.PI554389.v2.5U.G0769100/AeUmb.PI554389.v2.4U.G0447900/AeUmb.PI554389.v2.5U.G0742600/AeUmb.PI554389.v2.2U.G0143600/AeUmb.PI5…	18	0.947368
BP	GO:0032259	methylation	15	-0.500061	-2.02713	0.00105248	0.0226464	0.0210114	4137	tags=100%, list=50%, signal=50%	AeUmb.PI554389.v2.6U.G0193200/AeUmb.PI554389.v2.4U.G0026200/AeUmb.PI554389.v2.7U.G0863200/AeUmb.PI554389.v2.6U.G0657100/AeUmb.PI554389.v2.6U.G0099600/AeUmb.PI554389.v2.5U.G0430200/AeUmb.PI554389.v2.6U.G0547300/AeUmb.PI554389.v2.6U.G0573400/AeUmb.PI554389.v2.7U.G0841700/AeUmb.PI554389.v2.7U.G0695100/AeUmb.PI554389.v2.3U.G0736300/AeUmb.PI554389.v2.2U.G0683500/AeUmb.PI554389.v2.5U.G0416100/AeUmb.PI5…	14	0.933333
BP	GO:0006952	defense response	225	0.351939	1.30374	0.00120574	0.0250794	0.0232687	4350	tags=75%, list=53%, signal=36%	AeUmb.PI554389.v2.2U.G0863400/AeUmb.PI554389.v2.3U.G0580100/AeUmb.PI554389.v2.3U.G0546300/AeUmb.PI554389.v2.2U.G0520700/AeUmb.PI554389.v2.4U.G0215100/AeUmb.PI554389.v2.7U.G0833600/AeUmb.PI554389.v2.7U.G0759400/AeUmb.PI554389.v2.4U.G0187800/AeUmb.PI554389.v2.1U.G0377800/AeUmb.PI554389.v2.4U.G0033900/AeUmb.PI554389.v2.4U.G0215400/AeUmb.PI554389.v2.4U.G0025300/AeUmb.PI554389.v2.3U.G0546400/AeUmb.PI5…	168	0.746667
BP	GO:0009069	serine family amino acid metabolic process	14	-0.475983	-1.84799	0.0018003	0.0362383	0.0336219	4335	tags=100%, list=52%, signal=48%	AeUmb.PI554389.v2.7U.G0530700/AeUmb.PI554389.v2.6U.G0176400/AeUmb.PI554389.v2.2U.G0556300/AeUmb.PI554389.v2.5U.G0509400/AeUmb.PI554389.v2.7U.G0656900/AeUmb.PI554389.v2.7U.G0275700/AeUmb.PI554389.v2.6U.G0372900/AeUmb.PI554389.v2.7U.G0656100/AeUmb.PI554389.v2.3U.G0278900/AeUmb.PI554389.v2.2U.G0033700/AeUmb.PI554389.v2.1U.G0396400/AeUmb.PI554389.v2.3U.G0409200/AeUmb.PI554389.v2.4U.G0487000	13	0.928571
BP	GO:0006766	vitamin metabolic process	10	-0.570199	-1.88765	0.00264229	0.0484953	0.044994	3556	tags=100%, list=43%, signal=57%	AeUmb.PI554389.v2.1U.G0419900/AeUmb.PI554389.v2.4U.G0806300/AeUmb.PI554389.v2.3U.G0569000/AeUmb.PI554389.v2.3U.G0074600/AeUmb.PI554389.v2.6U.G0133200/AeUmb.PI554389.v2.6U.G0765200/AeUmb.PI554389.v2.7U.G0355600/AeUmb.PI554389.v2.5U.G0893100/AeUmb.PI554389.v2.2U.G0339800	9	0.9
BP	GO:0009110	vitamin biosynthetic process	10	-0.570199	-1.88765	0.00264229	0.0484953	0.044994	3556	tags=100%, list=43%, signal=57%	AeUmb.PI554389.v2.1U.G0419900/AeUmb.PI554389.v2.4U.G0806300/AeUmb.PI554389.v2.3U.G0569000/AeUmb.PI554389.v2.3U.G0074600/AeUmb.PI554389.v2.6U.G0133200/AeUmb.PI554389.v2.6U.G0765200/AeUmb.PI554389.v2.7U.G0355600/AeUmb.PI554389.v2.5U.G0893100/AeUmb.PI554389.v2.2U.G0339800	9	0.9
BP	GO:0006644	phospholipid metabolic process	32	-0.334306	-1.88228	0.00264237	0.0484953	0.044994	5509	tags=100%, list=67%, signal=33%	AeUmb.PI554389.v2.6U.G0256900/AeUmb.PI554389.v2.5U.G0355900/AeUmb.PI554389.v2.Un.G0010200/AeUmb.PI554389.v2.3U.G0231400/AeUmb.PI554389.v2.7U.G0434400/AeUmb.PI554389.v2.3U.G0698100/AeUmb.PI554389.v2.6U.G0074800/AeUmb.PI554389.v2.2U.G0546300/AeUmb.PI554389.v2.2U.G0528400/AeUmb.PI554389.v2.4U.G0835500/AeUmb.PI554389.v2.7U.G0658600/AeUmb.PI554389.v2.4U.G0145100/AeUmb.PI554389.v2.7U.G0098800/AeUmb.PI5…	31	0.96875

## Sheet: U89I24_vs_U17I24_Down
ONTOLOGY	ID	Description	setSize	enrichmentScore	NES	pvalue	p.adjust	qvalue	rank	leading_edge	core_enrichment	CoreGeneCount	GeneRatio
CC	GO:0016020	membrane	435	0.389213	1.47738	2.14628e-10	1.44015e-07	8.74325e-08	2715	tags=59%, list=40%, signal=38%	AeUmb.PI554389.v2.1U.G0000300/AeUmb.PI554389.v2.2U.G0131000/AeUmb.PI554389.v2.2U.G0182300/AeUmb.PI554389.v2.6U.G0686200/AeUmb.PI554389.v2.3U.G0077400/AeUmb.PI554389.v2.3U.G0547400/AeUmb.PI554389.v2.7U.G1028000/AeUmb.PI554389.v2.3U.G0170100/AeUmb.PI554389.v2.5U.G0283800/AeUmb.PI554389.v2.2U.G0314200/AeUmb.PI554389.v2.5U.G0197700/AeUmb.PI554389.v2.6U.G0460100/AeUmb.PI554389.v2.4U.G0027300/AeUmb.PI5…	255	0.586207
CC	GO:0031090	organelle membrane	72	0.556274	1.91797	2.95757e-09	9.92265e-07	6.0241e-07	2115	tags=76%, list=31%, signal=53%	AeUmb.PI554389.v2.1U.G0000300/AeUmb.PI554389.v2.2U.G0131000/AeUmb.PI554389.v2.3U.G0547400/AeUmb.PI554389.v2.5U.G0197700/AeUmb.PI554389.v2.6U.G0565000/AeUmb.PI554389.v2.3U.G0182800/AeUmb.PI554389.v2.1U.G0328200/AeUmb.PI554389.v2.7U.G0180200/AeUmb.PI554389.v2.6U.G0443700/AeUmb.PI554389.v2.3U.G0224600/AeUmb.PI554389.v2.6U.G0447100/AeUmb.PI554389.v2.5U.G0393200/AeUmb.PI554389.v2.4U.G0893900/AeUmb.PI5…	55	0.763889
BP	GO:0048507	meristem development	15	-0.782238	-3.16127	6.44395e-09	1.4413e-06	8.75021e-07	1497	tags=100%, list=22%, signal=78%	AeUmb.PI554389.v2.4U.G0072000/AeUmb.PI554389.v2.2U.G0018900/AeUmb.PI554389.v2.5U.G0388600/AeUmb.PI554389.v2.3U.G0289600/AeUmb.PI554389.v2.6U.G0081100/AeUmb.PI554389.v2.1U.G0514800/AeUmb.PI554389.v2.3U.G0329400/AeUmb.PI554389.v2.6U.G0671700/AeUmb.PI554389.v2.6U.G0115400/AeUmb.PI554389.v2.5U.G0151200/AeUmb.PI554389.v2.6U.G0550600/AeUmb.PI554389.v2.1U.G0244800/AeUmb.PI554389.v2.3U.G0099600/AeUmb.PI5…	14	0.933333
BP	GO:0010073	meristem maintenance	14	-0.782123	-3.02798	1.2901e-08	1.45167e-06	8.8132e-07	1497	tags=100%, list=22%, signal=78%	AeUmb.PI554389.v2.4U.G0072000/AeUmb.PI554389.v2.2U.G0018900/AeUmb.PI554389.v2.5U.G0388600/AeUmb.PI554389.v2.3U.G0289600/AeUmb.PI554389.v2.6U.G0081100/AeUmb.PI554389.v2.1U.G0514800/AeUmb.PI554389.v2.3U.G0329400/AeUmb.PI554389.v2.6U.G0115400/AeUmb.PI554389.v2.5U.G0151200/AeUmb.PI554389.v2.6U.G0550600/AeUmb.PI554389.v2.1U.G0244800/AeUmb.PI554389.v2.3U.G0099600/AeUmb.PI554389.v2.6U.G0496700	13	0.928571
CC	GO:0043227	membrane-bounded organelle	238	0.415358	1.543	1.29807e-08	1.45167e-06	8.8132e-07	2514	tags=63%, list=37%, signal=41%	AeUmb.PI554389.v2.1U.G0000300/AeUmb.PI554389.v2.3U.G0155000/AeUmb.PI554389.v2.2U.G0131000/AeUmb.PI554389.v2.3U.G0547400/AeUmb.PI554389.v2.5U.G0197700/AeUmb.PI554389.v2.6U.G0565000/AeUmb.PI554389.v2.3U.G0182800/AeUmb.PI554389.v2.1U.G0328200/AeUmb.PI554389.v2.7U.G0066800/AeUmb.PI554389.v2.5U.G0647100/AeUmb.PI554389.v2.4U.G0157900/AeUmb.PI554389.v2.7U.G0180200/AeUmb.PI554389.v2.5U.G0344700/AeUmb.PI5…	151	0.634454
CC	GO:0043231	intracellular membrane-bounded organelle	238	0.415358	1.543	1.29807e-08	1.45167e-06	8.8132e-07	2514	tags=63%, list=37%, signal=41%	AeUmb.PI554389.v2.1U.G0000300/AeUmb.PI554389.v2.3U.G0155000/AeUmb.PI554389.v2.2U.G0131000/AeUmb.PI554389.v2.3U.G0547400/AeUmb.PI554389.v2.5U.G0197700/AeUmb.PI554389.v2.6U.G0565000/AeUmb.PI554389.v2.3U.G0182800/AeUmb.PI554389.v2.1U.G0328200/AeUmb.PI554389.v2.7U.G0066800/AeUmb.PI554389.v2.5U.G0647100/AeUmb.PI554389.v2.4U.G0157900/AeUmb.PI554389.v2.7U.G0180200/AeUmb.PI554389.v2.5U.G0344700/AeUmb.PI5…	151	0.634454
CC	GO:0005737	cytoplasm	177	0.427974	1.56821	1.08548e-07	1.04051e-05	6.31699e-06	2151	tags=58%, list=32%, signal=41%	AeUmb.PI554389.v2.1U.G0000300/AeUmb.PI554389.v2.2U.G0131000/AeUmb.PI554389.v2.3U.G0547400/AeUmb.PI554389.v2.3U.G0344500/AeUmb.PI554389.v2.5U.G0197700/AeUmb.PI554389.v2.6U.G0565000/AeUmb.PI554389.v2.3U.G0182800/AeUmb.PI554389.v2.5U.G0512000/AeUmb.PI554389.v2.1U.G0328200/AeUmb.PI554389.v2.4U.G0657800/AeUmb.PI554389.v2.7U.G0180200/AeUmb.PI554389.v2.7U.G0841800/AeUmb.PI554389.v2.6U.G0588700/AeUmb.PI5…	103	0.581921
CC	GO:0005622	intracellular anatomical structure	446	0.361247	1.3723	1.82316e-07	1.35927e-05	8.25221e-06	2822	tags=59%, list=41%, signal=37%	AeUmb.PI554389.v2.1U.G0000300/AeUmb.PI554389.v2.3U.G0155000/AeUmb.PI554389.v2.2U.G0131000/AeUmb.PI554389.v2.2U.G0182300/AeUmb.PI554389.v2.2U.G0100400/AeUmb.PI554389.v2.3U.G0547400/AeUmb.PI554389.v2.3U.G0344500/AeUmb.PI554389.v2.5U.G0197700/AeUmb.PI554389.v2.6U.G0565000/AeUmb.PI554389.v2.3U.G0182800/AeUmb.PI554389.v2.5U.G0512000/AeUmb.PI554389.v2.1U.G0328200/AeUmb.PI554389.v2.7U.G0066800/AeUmb.PI5…	264	0.591928
BP	GO:0009059	macromolecule biosynthetic process	498	0.357027	1.36064	1.63347e-07	1.35927e-05	8.25221e-06	3195	tags=63%, list=47%, signal=36%	AeUmb.PI554389.v2.4U.G0897300/AeUmb.PI554389.v2.2U.G0051000/AeUmb.PI554389.v2.6U.G0326600/AeUmb.PI554389.v2.4U.G0807100/AeUmb.PI554389.v2.7U.G0367200/AeUmb.PI554389.v2.6U.G0601300/AeUmb.PI554389.v2.2U.G0314200/AeUmb.PI554389.v2.2U.G0785400/AeUmb.PI554389.v2.7U.G0932000/AeUmb.PI554389.v2.5U.G0314300/AeUmb.PI554389.v2.6U.G0591400/AeUmb.PI554389.v2.1U.G0437400/AeUmb.PI554389.v2.3U.G0290500/AeUmb.PI5…	314	0.630522
BP	GO:0010467	gene expression	473	0.354645	1.34945	4.72546e-07	3.17079e-05	1.92501e-05	3258	tags=64%, list=48%, signal=36%	AeUmb.PI554389.v2.4U.G0897300/AeUmb.PI554389.v2.2U.G0051000/AeUmb.PI554389.v2.6U.G0326600/AeUmb.PI554389.v2.4U.G0807100/AeUmb.PI554389.v2.7U.G0367200/AeUmb.PI554389.v2.6U.G0601300/AeUmb.PI554389.v2.2U.G0785400/AeUmb.PI554389.v2.7U.G0932000/AeUmb.PI554389.v2.5U.G0314300/AeUmb.PI554389.v2.6U.G0591400/AeUmb.PI554389.v2.1U.G0437400/AeUmb.PI554389.v2.3U.G0290500/AeUmb.PI554389.v2.5U.G0190400/AeUmb.PI5…	303	0.640592
CC	GO:0098796	membrane protein complex	76	0.507908	1.75977	8.04599e-07	4.90805e-05	2.97971e-05	2151	tags=68%, list=32%, signal=47%	AeUmb.PI554389.v2.2U.G0131000/AeUmb.PI554389.v2.2U.G0182300/AeUmb.PI554389.v2.3U.G0547400/AeUmb.PI554389.v2.3U.G0170100/AeUmb.PI554389.v2.5U.G0197700/AeUmb.PI554389.v2.6U.G0565000/AeUmb.PI554389.v2.2U.G0191900/AeUmb.PI554389.v2.3U.G0224600/AeUmb.PI554389.v2.4U.G0893900/AeUmb.PI554389.v2.4U.G0929500/AeUmb.PI554389.v2.7U.G0988100/AeUmb.PI554389.v2.2U.G0191100/AeUmb.PI554389.v2.6U.G0074700/AeUmb.PI5…	52	0.684211
CC	GO:0043226	organelle	361	0.361446	1.3646	2.25284e-06	0.000116281	7.0595e-05	3171	tags=65%, list=47%, signal=37%	AeUmb.PI554389.v2.1U.G0000300/AeUmb.PI554389.v2.3U.G0155000/AeUmb.PI554389.v2.2U.G0131000/AeUmb.PI554389.v2.3U.G0547400/AeUmb.PI554389.v2.5U.G0197700/AeUmb.PI554389.v2.6U.G0565000/AeUmb.PI554389.v2.3U.G0182800/AeUmb.PI554389.v2.1U.G0328200/AeUmb.PI554389.v2.7U.G0066800/AeUmb.PI554389.v2.5U.G0647100/AeUmb.PI554389.v2.4U.G0157900/AeUmb.PI554389.v2.7U.G0180200/AeUmb.PI554389.v2.5U.G0344700/AeUmb.PI5…	236	0.65374
CC	GO:0043229	intracellular organelle	361	0.361446	1.3646	2.25284e-06	0.000116281	7.0595e-05	3171	tags=65%, list=47%, signal=37%	AeUmb.PI554389.v2.1U.G0000300/AeUmb.PI554389.v2.3U.G0155000/AeUmb.PI554389.v2.2U.G0131000/AeUmb.PI554389.v2.3U.G0547400/AeUmb.PI554389.v2.5U.G0197700/AeUmb.PI554389.v2.6U.G0565000/AeUmb.PI554389.v2.3U.G0182800/AeUmb.PI554389.v2.1U.G0328200/AeUmb.PI554389.v2.7U.G0066800/AeUmb.PI554389.v2.5U.G0647100/AeUmb.PI554389.v2.4U.G0157900/AeUmb.PI554389.v2.7U.G0180200/AeUmb.PI554389.v2.5U.G0344700/AeUmb.PI5…	236	0.65374
MF	GO:0019001	guanyl nucleotide binding	42	0.578187	1.89416	2.73545e-06	0.000122366	7.42889e-05	1664	tags=71%, list=24%, signal=54%	AeUmb.PI554389.v2.4U.G0524900/AeUmb.PI554389.v2.1U.G0323500/AeUmb.PI554389.v2.3U.G0159400/AeUmb.PI554389.v2.3U.G0281900/AeUmb.PI554389.v2.6U.G0195800/AeUmb.PI554389.v2.4U.G0060400/AeUmb.PI554389.v2.1U.G0032700/AeUmb.PI554389.v2.4U.G0630900/AeUmb.PI554389.v2.6U.G0585700/AeUmb.PI554389.v2.4U.G1023200/AeUmb.PI554389.v2.6U.G0229600/AeUmb.PI554389.v2.5U.G0038500/AeUmb.PI554389.v2.1U.G0386900/AeUmb.PI5…	30	0.714286
CC	GO:0032991	protein-containing complex	271	0.37886	1.41514	2.59678e-06	0.000122366	7.42889e-05	2733	tags=59%, list=40%, signal=37%	AeUmb.PI554389.v2.2U.G0131000/AeUmb.PI554389.v2.2U.G0182300/AeUmb.PI554389.v2.3U.G0636800/AeUmb.PI554389.v2.2U.G0100400/AeUmb.PI554389.v2.2U.G0395200/AeUmb.PI554389.v2.3U.G0547400/AeUmb.PI554389.v2.3U.G0170100/AeUmb.PI554389.v2.4U.G0825400/AeUmb.PI554389.v2.5U.G0197700/AeUmb.PI554389.v2.6U.G0565000/AeUmb.PI554389.v2.5U.G0481500/AeUmb.PI554389.v2.5U.G0647100/AeUmb.PI554389.v2.1U.G0244000/AeUmb.PI5…	161	0.594096
BP	GO:0016043	cellular component organization	157	0.420957	1.5332	2.94071e-06	0.000123326	7.48722e-05	2130	tags=50%, list=31%, signal=35%	AeUmb.PI554389.v2.1U.G0000300/AeUmb.PI554389.v2.3U.G0155000/AeUmb.PI554389.v2.2U.G0528700/AeUmb.PI554389.v2.3U.G0495600/AeUmb.PI554389.v2.5U.G0197700/AeUmb.PI554389.v2.6U.G0565000/AeUmb.PI554389.v2.6U.G0738100/AeUmb.PI554389.v2.5U.G0313500/AeUmb.PI554389.v2.7U.G0180200/AeUmb.PI554389.v2.6U.G0153600/AeUmb.PI554389.v2.2U.G0702300/AeUmb.PI554389.v2.2U.G0191900/AeUmb.PI554389.v2.2U.G0345000/AeUmb.PI5…	78	0.496815
BP	GO:0046907	intracellular transport	53	0.529156	1.77519	4.45924e-06	0.000166231	0.00010092	2151	tags=70%, list=32%, signal=48%	AeUmb.PI554389.v2.1U.G0000300/AeUmb.PI554389.v2.5U.G0197700/AeUmb.PI554389.v2.6U.G0565000/AeUmb.PI554389.v2.4U.G0060400/AeUmb.PI554389.v2.7U.G0180200/AeUmb.PI554389.v2.6U.G0588700/AeUmb.PI554389.v2.6U.G0466400/AeUmb.PI554389.v2.3U.G0035500/AeUmb.PI554389.v2.6U.G0239900/AeUmb.PI554389.v2.1U.G0400500/AeUmb.PI554389.v2.5U.G0393200/AeUmb.PI554389.v2.4U.G0893900/AeUmb.PI554389.v2.7U.G0988100/AeUmb.PI5…	37	0.698113
BP	GO:0051649	establishment of localization in cell	53	0.529156	1.77519	4.45924e-06	0.000166231	0.00010092	2151	tags=70%, list=32%, signal=48%	AeUmb.PI554389.v2.1U.G0000300/AeUmb.PI554389.v2.5U.G0197700/AeUmb.PI554389.v2.6U.G0565000/AeUmb.PI554389.v2.4U.G0060400/AeUmb.PI554389.v2.7U.G0180200/AeUmb.PI554389.v2.6U.G0588700/AeUmb.PI554389.v2.6U.G0466400/AeUmb.PI554389.v2.3U.G0035500/AeUmb.PI554389.v2.6U.G0239900/AeUmb.PI554389.v2.1U.G0400500/AeUmb.PI554389.v2.5U.G0393200/AeUmb.PI554389.v2.4U.G0893900/AeUmb.PI554389.v2.7U.G0988100/AeUmb.PI5…	37	0.698113
BP	GO:0032196	transposition	12	-0.728836	-2.66588	5.7553e-06	0.000203253	0.000123396	1858	tags=100%, list=27%, signal=73%	AeUmb.PI554389.v2.7U.G0720100/AeUmb.PI554389.v2.3U.G0544200/AeUmb.PI554389.v2.6U.G0620200/AeUmb.PI554389.v2.1U.G0052100/AeUmb.PI554389.v2.4U.G0315600/AeUmb.PI554389.v2.4U.G0102300/AeUmb.PI554389.v2.5U.G0626000/AeUmb.PI554389.v2.7U.G0551000/AeUmb.PI554389.v2.6U.G0043100/AeUmb.PI554389.v2.6U.G0295200/AeUmb.PI554389.v2.2U.G0464800	11	0.916667
MF	GO:0003924	GTPase activity	35	0.578113	1.85514	6.88652e-06	0.000220041	0.000133588	1664	tags=71%, list=24%, signal=54%	AeUmb.PI554389.v2.4U.G0524900/AeUmb.PI554389.v2.1U.G0323500/AeUmb.PI554389.v2.3U.G0159400/AeUmb.PI554389.v2.3U.G0281900/AeUmb.PI554389.v2.6U.G0195800/AeUmb.PI554389.v2.4U.G0060400/AeUmb.PI554389.v2.1U.G0032700/AeUmb.PI554389.v2.6U.G0585700/AeUmb.PI554389.v2.4U.G1023200/AeUmb.PI554389.v2.5U.G0038500/AeUmb.PI554389.v2.1U.G0386900/AeUmb.PI554389.v2.7U.G0871800/AeUmb.PI554389.v2.4U.G0758600/AeUmb.PI5…	25	0.714286
MF	GO:0003723	RNA binding	141	0.424697	1.53707	6.60175e-06	0.000220041	0.000133588	2038	tags=52%, list=30%, signal=38%	AeUmb.PI554389.v2.2U.G0066100/AeUmb.PI554389.v2.7U.G0274800/AeUmb.PI554389.v2.3U.G0444300/AeUmb.PI554389.v2.7U.G0811000/AeUmb.PI554389.v2.3U.G0402300/AeUmb.PI554389.v2.1U.G0419400/AeUmb.PI554389.v2.5U.G0314300/AeUmb.PI554389.v2.1U.G0437400/AeUmb.PI554389.v2.7U.G0698900/AeUmb.PI554389.v2.3U.G0032100/AeUmb.PI554389.v2.7U.G0981900/AeUmb.PI554389.v2.4U.G0908700/AeUmb.PI554389.v2.7U.G0197800/AeUmb.PI5…	74	0.524823
BP	GO:0071840	cellular component organization or biogenesis	178	0.400138	1.46661	9.65632e-06	0.000294518	0.000178804	2130	tags=49%, list=31%, signal=35%	AeUmb.PI554389.v2.1U.G0000300/AeUmb.PI554389.v2.3U.G0155000/AeUmb.PI554389.v2.2U.G0528700/AeUmb.PI554389.v2.3U.G0495600/AeUmb.PI554389.v2.5U.G0197700/AeUmb.PI554389.v2.6U.G0565000/AeUmb.PI554389.v2.6U.G0738100/AeUmb.PI554389.v2.5U.G0313500/AeUmb.PI554389.v2.7U.G0180200/AeUmb.PI554389.v2.6U.G0153600/AeUmb.PI554389.v2.2U.G0702300/AeUmb.PI554389.v2.2U.G0191900/AeUmb.PI554389.v2.6U.G0176500/AeUmb.PI5…	87	0.488764
CC	GO:1902494	catalytic complex	112	0.435723	1.55609	1.21572e-05	0.000354673	0.000215324	2488	tags=65%, list=37%, signal=42%	AeUmb.PI554389.v2.2U.G0131000/AeUmb.PI554389.v2.2U.G0182300/AeUmb.PI554389.v2.3U.G0636800/AeUmb.PI554389.v2.2U.G0100400/AeUmb.PI554389.v2.2U.G0395200/AeUmb.PI554389.v2.3U.G0547400/AeUmb.PI554389.v2.3U.G0170100/AeUmb.PI554389.v2.4U.G0825400/AeUmb.PI554389.v2.5U.G0481500/AeUmb.PI554389.v2.1U.G0244000/AeUmb.PI554389.v2.7U.G0841800/AeUmb.PI554389.v2.7U.G0074000/AeUmb.PI554389.v2.2U.G0191900/AeUmb.PI5…	73	0.651786
BP	GO:0051641	cellular localization	69	0.480639	1.65107	1.99665e-05	0.000550891	0.000334449	2151	tags=65%, list=32%, signal=45%	AeUmb.PI554389.v2.1U.G0000300/AeUmb.PI554389.v2.5U.G0197700/AeUmb.PI554389.v2.6U.G0565000/AeUmb.PI554389.v2.6U.G0195800/AeUmb.PI554389.v2.4U.G0060400/AeUmb.PI554389.v2.7U.G0180200/AeUmb.PI554389.v2.6U.G0588700/AeUmb.PI554389.v2.6U.G0466400/AeUmb.PI554389.v2.3U.G0035500/AeUmb.PI554389.v2.6U.G0443700/AeUmb.PI554389.v2.6U.G0239900/AeUmb.PI554389.v2.1U.G0400500/AeUmb.PI554389.v2.5U.G0393200/AeUmb.PI5…	45	0.652174
BP	GO:0016070	RNA metabolic process	403	0.346283	1.31152	2.0525e-05	0.000550891	0.000334449	3659	tags=70%, list=54%, signal=35%	AeUmb.PI554389.v2.4U.G0897300/AeUmb.PI554389.v2.2U.G0051000/AeUmb.PI554389.v2.4U.G0807100/AeUmb.PI554389.v2.7U.G0367200/AeUmb.PI554389.v2.6U.G0601300/AeUmb.PI554389.v2.2U.G0785400/AeUmb.PI554389.v2.7U.G0932000/AeUmb.PI554389.v2.5U.G0314300/AeUmb.PI554389.v2.1U.G0437400/AeUmb.PI554389.v2.3U.G0290500/AeUmb.PI554389.v2.5U.G0190400/AeUmb.PI554389.v2.7U.G0066800/AeUmb.PI554389.v2.5U.G0647100/AeUmb.PI5…	283	0.702233
CC	GO:0098588	bounding membrane of organelle	26	0.603536	1.86238	2.64898e-05	0.000683642	0.000415043	2475	tags=88%, list=36%, signal=57%	AeUmb.PI554389.v2.1U.G0000300/AeUmb.PI554389.v2.2U.G0131000/AeUmb.PI554389.v2.3U.G0182800/AeUmb.PI554389.v2.7U.G0180200/AeUmb.PI554389.v2.3U.G0224600/AeUmb.PI554389.v2.6U.G0447100/AeUmb.PI554389.v2.5U.G0393200/AeUmb.PI554389.v2.4U.G0893900/AeUmb.PI554389.v2.5U.G0216700/AeUmb.PI554389.v2.5U.G0437900/AeUmb.PI554389.v2.2U.G0463900/AeUmb.PI554389.v2.5U.G0335400/AeUmb.PI554389.v2.2U.G0069800/AeUmb.PI5…	23	0.884615
BP	GO:0090304	nucleic acid metabolic process	481	0.33892	1.29022	2.77854e-05	0.00069052	0.000419219	3342	tags=62%, list=49%, signal=34%	AeUmb.PI554389.v2.4U.G0897300/AeUmb.PI554389.v2.2U.G0051000/AeUmb.PI554389.v2.4U.G0807100/AeUmb.PI554389.v2.7U.G0367200/AeUmb.PI554389.v2.6U.G0601300/AeUmb.PI554389.v2.2U.G0785400/AeUmb.PI554389.v2.7U.G0932000/AeUmb.PI554389.v2.5U.G0314300/AeUmb.PI554389.v2.1U.G0437400/AeUmb.PI554389.v2.3U.G0290500/AeUmb.PI554389.v2.5U.G0190400/AeUmb.PI554389.v2.7U.G0066800/AeUmb.PI554389.v2.5U.G0647100/AeUmb.PI5…	298	0.619543
MF	GO:0015078	proton transmembrane transporter activity	26	0.599168	1.84891	3.46493e-05	0.000810191	0.000491872	1444	tags=62%, list=21%, signal=49%	AeUmb.PI554389.v2.2U.G0131000/AeUmb.PI554389.v2.2U.G0182300/AeUmb.PI554389.v2.7U.G1028000/AeUmb.PI554389.v2.3U.G0170100/AeUmb.PI554389.v2.6U.G0460100/AeUmb.PI554389.v2.4U.G0929500/AeUmb.PI554389.v2.2U.G0475900/AeUmb.PI554389.v2.3U.G0195000/AeUmb.PI554389.v2.4U.G0869200/AeUmb.PI554389.v2.2U.G0463900/AeUmb.PI554389.v2.5U.G0229400/AeUmb.PI554389.v2.3U.G0245000/AeUmb.PI554389.v2.2U.G0672700/AeUmb.PI5…	16	0.615385
MF	GO:0005525	GTP binding	38	0.555912	1.80352	3.62232e-05	0.000810191	0.000491872	1664	tags=68%, list=24%, signal=52%	AeUmb.PI554389.v2.1U.G0323500/AeUmb.PI554389.v2.3U.G0159400/AeUmb.PI554389.v2.3U.G0281900/AeUmb.PI554389.v2.6U.G0195800/AeUmb.PI554389.v2.4U.G0060400/AeUmb.PI554389.v2.1U.G0032700/AeUmb.PI554389.v2.4U.G0630900/AeUmb.PI554389.v2.6U.G0585700/AeUmb.PI554389.v2.4U.G1023200/AeUmb.PI554389.v2.6U.G0229600/AeUmb.PI554389.v2.5U.G0038500/AeUmb.PI554389.v2.1U.G0386900/AeUmb.PI554389.v2.3U.G0661200/AeUmb.PI5…	26	0.684211
MF	GO:0032561	guanyl ribonucleotide binding	38	0.555912	1.80352	3.62232e-05	0.000810191	0.000491872	1664	tags=68%, list=24%, signal=52%	AeUmb.PI554389.v2.1U.G0323500/AeUmb.PI554389.v2.3U.G0159400/AeUmb.PI554389.v2.3U.G0281900/AeUmb.PI554389.v2.6U.G0195800/AeUmb.PI554389.v2.4U.G0060400/AeUmb.PI554389.v2.1U.G0032700/AeUmb.PI554389.v2.4U.G0630900/AeUmb.PI554389.v2.6U.G0585700/AeUmb.PI554389.v2.4U.G1023200/AeUmb.PI554389.v2.6U.G0229600/AeUmb.PI554389.v2.5U.G0038500/AeUmb.PI554389.v2.1U.G0386900/AeUmb.PI554389.v2.3U.G0661200/AeUmb.PI5…	26	0.684211
BP	GO:0006091	generation of precursor metabolites and energy	59	0.484582	1.64235	5.58509e-05	0.0012089	0.000733932	2585	tags=73%, list=38%, signal=46%	AeUmb.PI554389.v2.3U.G0547400/AeUmb.PI554389.v2.6U.G0374900/AeUmb.PI554389.v2.4U.G0248600/AeUmb.PI554389.v2.2U.G0191900/AeUmb.PI554389.v2.6U.G0263200/AeUmb.PI554389.v2.4U.G0925100/AeUmb.PI554389.v2.3U.G0063200/AeUmb.PI554389.v2.2U.G0122500/AeUmb.PI554389.v2.4U.G0047600/AeUmb.PI554389.v2.3U.G0416200/AeUmb.PI554389.v2.6U.G0309500/AeUmb.PI554389.v2.7U.G0589600/AeUmb.PI554389.v2.2U.G0222600/AeUmb.PI5…	43	0.728814
BP	GO:0044271	cellular nitrogen compound biosynthetic process	397	0.344071	1.30225	6.148e-05	0.00128916	0.000782656	3657	tags=70%, list=54%, signal=34%	AeUmb.PI554389.v2.4U.G0897300/AeUmb.PI554389.v2.2U.G0182300/AeUmb.PI554389.v2.2U.G0051000/AeUmb.PI554389.v2.6U.G0326600/AeUmb.PI554389.v2.4U.G0807100/AeUmb.PI554389.v2.1U.G0255100/AeUmb.PI554389.v2.6U.G0601300/AeUmb.PI554389.v2.7U.G0932000/AeUmb.PI554389.v2.3U.G0290500/AeUmb.PI554389.v2.5U.G0190400/AeUmb.PI554389.v2.5U.G0056200/AeUmb.PI554389.v2.5U.G0647100/AeUmb.PI554389.v2.5U.G0201300/AeUmb.PI5…	277	0.697733
CC	GO:1990204	oxidoreductase complex	24	0.612647	1.86676	6.40949e-05	0.00130326	0.00079122	2355	tags=83%, list=35%, signal=55%	AeUmb.PI554389.v2.3U.G0547400/AeUmb.PI554389.v2.7U.G0841800/AeUmb.PI554389.v2.2U.G0191900/AeUmb.PI554389.v2.2U.G0191100/AeUmb.PI554389.v2.5U.G0353800/AeUmb.PI554389.v2.2U.G0341200/AeUmb.PI554389.v2.7U.G0200500/AeUmb.PI554389.v2.7U.G0589600/AeUmb.PI554389.v2.2U.G0030200/AeUmb.PI554389.v2.4U.G0374900/AeUmb.PI554389.v2.1U.G0423600/AeUmb.PI554389.v2.7U.G0182200/AeUmb.PI554389.v2.2U.G0139500/AeUmb.PI5…	20	0.833333
CC	GO:0031966	mitochondrial membrane	39	0.535974	1.74335	7.05396e-05	0.00139212	0.000845164	2262	tags=79%, list=33%, signal=53%	AeUmb.PI554389.v2.3U.G0547400/AeUmb.PI554389.v2.5U.G0197700/AeUmb.PI554389.v2.6U.G0565000/AeUmb.PI554389.v2.3U.G0182800/AeUmb.PI554389.v2.7U.G0988100/AeUmb.PI554389.v2.6U.G0074700/AeUmb.PI554389.v2.5U.G0353800/AeUmb.PI554389.v2.7U.G0200500/AeUmb.PI554389.v2.7U.G0589600/AeUmb.PI554389.v2.2U.G0030200/AeUmb.PI554389.v2.4U.G0374900/AeUmb.PI554389.v2.1U.G0423600/AeUmb.PI554389.v2.5U.G0335400/AeUmb.PI5…	31	0.794872
BP	GO:0019752	carboxylic acid metabolic process	85	0.438156	1.53239	0.000103218	0.00197883	0.00120136	1962	tags=54%, list=29%, signal=39%	AeUmb.PI554389.v2.7U.G0157700/AeUmb.PI554389.v2.7U.G0909300/AeUmb.PI554389.v2.4U.G0071000/AeUmb.PI554389.v2.5U.G0512000/AeUmb.PI554389.v2.6U.G0374900/AeUmb.PI554389.v2.6U.G0380900/AeUmb.PI554389.v2.4U.G0248600/AeUmb.PI554389.v2.7U.G0841800/AeUmb.PI554389.v2.1U.G0436800/AeUmb.PI554389.v2.6U.G0263200/AeUmb.PI554389.v2.3U.G0134300/AeUmb.PI554389.v2.3U.G0481800/AeUmb.PI554389.v2.4U.G0925100/AeUmb.PI5…	46	0.541176
CC	GO:0005739	mitochondrion	51	0.49468	1.65421	0.00010888	0.0020294	0.00123206	2115	tags=69%, list=31%, signal=48%	AeUmb.PI554389.v2.3U.G0547400/AeUmb.PI554389.v2.5U.G0197700/AeUmb.PI554389.v2.6U.G0565000/AeUmb.PI554389.v2.3U.G0182800/AeUmb.PI554389.v2.7U.G0988100/AeUmb.PI554389.v2.6U.G0074700/AeUmb.PI554389.v2.5U.G0353800/AeUmb.PI554389.v2.5U.G0913900/AeUmb.PI554389.v2.2U.G0057300/AeUmb.PI554389.v2.7U.G0200500/AeUmb.PI554389.v2.7U.G0589600/AeUmb.PI554389.v2.2U.G0030200/AeUmb.PI554389.v2.4U.G0374900/AeUmb.PI5…	35	0.686275
BP	GO:0044281	small molecule metabolic process	156	0.394752	1.43712	0.000119033	0.00215867	0.00131054	2820	tags=63%, list=41%, signal=38%	AeUmb.PI554389.v2.7U.G0157700/AeUmb.PI554389.v2.7U.G0909300/AeUmb.PI554389.v2.2U.G0182300/AeUmb.PI554389.v2.3U.G0344500/AeUmb.PI554389.v2.5U.G0260600/AeUmb.PI554389.v2.4U.G0071000/AeUmb.PI554389.v2.5U.G0512000/AeUmb.PI554389.v2.6U.G0374900/AeUmb.PI554389.v2.6U.G0380900/AeUmb.PI554389.v2.4U.G0248600/AeUmb.PI554389.v2.7U.G0841800/AeUmb.PI554389.v2.7U.G0188800/AeUmb.PI554389.v2.1U.G0436800/AeUmb.PI5…	98	0.628205
CC	GO:0019866	organelle inner membrane	30	0.564277	1.77795	0.000123815	0.00218631	0.00132732	2115	tags=80%, list=31%, signal=55%	AeUmb.PI554389.v2.3U.G0547400/AeUmb.PI554389.v2.5U.G0197700/AeUmb.PI554389.v2.6U.G0565000/AeUmb.PI554389.v2.7U.G0988100/AeUmb.PI554389.v2.6U.G0074700/AeUmb.PI554389.v2.5U.G0353800/AeUmb.PI554389.v2.7U.G0200500/AeUmb.PI554389.v2.7U.G0589600/AeUmb.PI554389.v2.2U.G0030200/AeUmb.PI554389.v2.4U.G0374900/AeUmb.PI554389.v2.1U.G0423600/AeUmb.PI554389.v2.5U.G0692000/AeUmb.PI554389.v2.6U.G0188600/AeUmb.PI5…	24	0.8
BP	GO:0000723	telomere maintenance	12	-0.642563	-2.35031	0.000152318	0.00251193	0.00152501	2445	tags=100%, list=36%, signal=64%	AeUmb.PI554389.v2.1U.G0373300/AeUmb.PI554389.v2.6U.G0358100/AeUmb.PI554389.v2.7U.G0819400/AeUmb.PI554389.v2.6U.G0454000/AeUmb.PI554389.v2.7U.G1038300/AeUmb.PI554389.v2.5U.G0037400/AeUmb.PI554389.v2.1U.G0467100/AeUmb.PI554389.v2.2U.G0457300/AeUmb.PI554389.v2.1U.G0127100/AeUmb.PI554389.v2.2U.G0692900/AeUmb.PI554389.v2.7U.G0498900	11	0.916667
BP	GO:0032200	telomere organization	12	-0.642563	-2.35031	0.000152318	0.00251193	0.00152501	2445	tags=100%, list=36%, signal=64%	AeUmb.PI554389.v2.1U.G0373300/AeUmb.PI554389.v2.6U.G0358100/AeUmb.PI554389.v2.7U.G0819400/AeUmb.PI554389.v2.6U.G0454000/AeUmb.PI554389.v2.7U.G1038300/AeUmb.PI554389.v2.5U.G0037400/AeUmb.PI554389.v2.1U.G0467100/AeUmb.PI554389.v2.2U.G0457300/AeUmb.PI554389.v2.1U.G0127100/AeUmb.PI554389.v2.2U.G0692900/AeUmb.PI554389.v2.7U.G0498900	11	0.916667
BP	GO:0006886	intracellular protein transport	28	0.57738	1.80071	0.000153486	0.00251193	0.00152501	2314	tags=75%, list=34%, signal=50%	AeUmb.PI554389.v2.1U.G0000300/AeUmb.PI554389.v2.5U.G0197700/AeUmb.PI554389.v2.6U.G0565000/AeUmb.PI554389.v2.7U.G0180200/AeUmb.PI554389.v2.6U.G0588700/AeUmb.PI554389.v2.3U.G0035500/AeUmb.PI554389.v2.6U.G0239900/AeUmb.PI554389.v2.4U.G0893900/AeUmb.PI554389.v2.7U.G0988100/AeUmb.PI554389.v2.2U.G0069800/AeUmb.PI554389.v2.6U.G0188600/AeUmb.PI554389.v2.5U.G0403800/AeUmb.PI554389.v2.6U.G0295400/AeUmb.PI5…	21	0.75
BP	GO:0006082	organic acid metabolic process	88	0.426271	1.49481	0.000166645	0.00266234	0.00161633	2820	tags=66%, list=41%, signal=39%	AeUmb.PI554389.v2.7U.G0157700/AeUmb.PI554389.v2.7U.G0909300/AeUmb.PI554389.v2.4U.G0071000/AeUmb.PI554389.v2.5U.G0512000/AeUmb.PI554389.v2.6U.G0374900/AeUmb.PI554389.v2.6U.G0380900/AeUmb.PI554389.v2.4U.G0248600/AeUmb.PI554389.v2.7U.G0841800/AeUmb.PI554389.v2.1U.G0436800/AeUmb.PI554389.v2.6U.G0263200/AeUmb.PI554389.v2.3U.G0134300/AeUmb.PI554389.v2.3U.G0481800/AeUmb.PI554389.v2.4U.G0925100/AeUmb.PI5…	58	0.659091
BP	GO:0019438	aromatic compound biosynthetic process	339	0.34144	1.28647	0.000175713	0.00274195	0.00166465	3669	tags=70%, list=54%, signal=34%	AeUmb.PI554389.v2.4U.G0897300/AeUmb.PI554389.v2.2U.G0182300/AeUmb.PI554389.v2.2U.G0051000/AeUmb.PI554389.v2.4U.G0807100/AeUmb.PI554389.v2.1U.G0255100/AeUmb.PI554389.v2.6U.G0601300/AeUmb.PI554389.v2.7U.G0932000/AeUmb.PI554389.v2.3U.G0290500/AeUmb.PI554389.v2.5U.G0647100/AeUmb.PI554389.v2.5U.G0201300/AeUmb.PI554389.v2.1U.G0140800/AeUmb.PI554389.v2.1U.G0258000/AeUmb.PI554389.v2.6U.G0446200/AeUmb.PI5…	237	0.699115
BP	GO:0009259	ribonucleotide metabolic process	35	0.525423	1.68606	0.000180464	0.00275208	0.00167081	2698	tags=80%, list=40%, signal=49%	AeUmb.PI554389.v2.2U.G0182300/AeUmb.PI554389.v2.6U.G0374900/AeUmb.PI554389.v2.4U.G0248600/AeUmb.PI554389.v2.7U.G0841800/AeUmb.PI554389.v2.6U.G0263200/AeUmb.PI554389.v2.4U.G0925100/AeUmb.PI554389.v2.6U.G0611800/AeUmb.PI554389.v2.4U.G0869200/AeUmb.PI554389.v2.3U.G0416200/AeUmb.PI554389.v2.7U.G0114600/AeUmb.PI554389.v2.2U.G0892100/AeUmb.PI554389.v2.7U.G0182200/AeUmb.PI554389.v2.7U.G0532800/AeUmb.PI5…	28	0.8
CC	GO:0005743	mitochondrial inner membrane	29	0.559646	1.75452	0.000187612	0.00276211	0.00167689	2115	tags=79%, list=31%, signal=55%	AeUmb.PI554389.v2.3U.G0547400/AeUmb.PI554389.v2.5U.G0197700/AeUmb.PI554389.v2.6U.G0565000/AeUmb.PI554389.v2.7U.G0988100/AeUmb.PI554389.v2.6U.G0074700/AeUmb.PI554389.v2.5U.G0353800/AeUmb.PI554389.v2.7U.G0200500/AeUmb.PI554389.v2.7U.G0589600/AeUmb.PI554389.v2.2U.G0030200/AeUmb.PI554389.v2.4U.G0374900/AeUmb.PI554389.v2.1U.G0423600/AeUmb.PI554389.v2.5U.G0692000/AeUmb.PI554389.v2.6U.G0188600/AeUmb.PI5…	23	0.793103
BP	GO:0009117	nucleotide metabolic process	49	0.496269	1.65337	0.000189355	0.00276211	0.00167689	2568	tags=73%, list=38%, signal=46%	AeUmb.PI554389.v2.2U.G0182300/AeUmb.PI554389.v2.6U.G0374900/AeUmb.PI554389.v2.4U.G0248600/AeUmb.PI554389.v2.7U.G0841800/AeUmb.PI554389.v2.6U.G0263200/AeUmb.PI554389.v2.3U.G0276000/AeUmb.PI554389.v2.4U.G0925100/AeUmb.PI554389.v2.6U.G0611800/AeUmb.PI554389.v2.6U.G0563300/AeUmb.PI554389.v2.4U.G0869200/AeUmb.PI554389.v2.3U.G0416200/AeUmb.PI554389.v2.2U.G0222600/AeUmb.PI554389.v2.2U.G0252000/AeUmb.PI5…	36	0.734694
BP	GO:0019693	ribose phosphate metabolic process	36	0.52832	1.70158	0.000194026	0.00277003	0.0016817	2698	tags=81%, list=40%, signal=49%	AeUmb.PI554389.v2.2U.G0182300/AeUmb.PI554389.v2.6U.G0374900/AeUmb.PI554389.v2.4U.G0248600/AeUmb.PI554389.v2.7U.G0841800/AeUmb.PI554389.v2.6U.G0263200/AeUmb.PI554389.v2.4U.G0925100/AeUmb.PI554389.v2.6U.G0611800/AeUmb.PI554389.v2.4U.G0869200/AeUmb.PI554389.v2.3U.G0416200/AeUmb.PI554389.v2.2U.G0222600/AeUmb.PI554389.v2.7U.G0114600/AeUmb.PI554389.v2.2U.G0892100/AeUmb.PI554389.v2.7U.G0182200/AeUmb.PI5…	29	0.805556
BP	GO:1901362	organic cyclic compound biosynthetic process	348	0.341014	1.28601	0.000198386	0.00277327	0.00168367	3669	tags=70%, list=54%, signal=34%	AeUmb.PI554389.v2.4U.G0897300/AeUmb.PI554389.v2.2U.G0182300/AeUmb.PI554389.v2.2U.G0051000/AeUmb.PI554389.v2.4U.G0807100/AeUmb.PI554389.v2.1U.G0255100/AeUmb.PI554389.v2.6U.G0601300/AeUmb.PI554389.v2.7U.G0932000/AeUmb.PI554389.v2.3U.G0290500/AeUmb.PI554389.v2.5U.G0647100/AeUmb.PI554389.v2.5U.G0201300/AeUmb.PI554389.v2.1U.G0140800/AeUmb.PI554389.v2.1U.G0258000/AeUmb.PI554389.v2.6U.G0446200/AeUmb.PI5…	243	0.698276
CC	GO:0070469	respirasome	14	0.69112	1.9183	0.000211861	0.00290119	0.00176133	2115	tags=100%, list=31%, signal=69%	AeUmb.PI554389.v2.3U.G0547400/AeUmb.PI554389.v2.5U.G0353800/AeUmb.PI554389.v2.2U.G0057300/AeUmb.PI554389.v2.7U.G0200500/AeUmb.PI554389.v2.7U.G0589600/AeUmb.PI554389.v2.2U.G0030200/AeUmb.PI554389.v2.4U.G0374900/AeUmb.PI554389.v2.1U.G0423600/AeUmb.PI554389.v2.5U.G0692000/AeUmb.PI554389.v2.5U.G0180100/AeUmb.PI554389.v2.7U.G0143200/AeUmb.PI554389.v2.7U.G0677500/AeUmb.PI554389.v2.5U.G0237400/AeUmb.PI5…	14	1
BP	GO:0006090	pyruvate metabolic process	20	0.615373	1.82298	0.000242024	0.00320761	0.00194736	2451	tags=90%, list=36%, signal=58%	AeUmb.PI554389.v2.6U.G0374900/AeUmb.PI554389.v2.4U.G0248600/AeUmb.PI554389.v2.7U.G0841800/AeUmb.PI554389.v2.6U.G0263200/AeUmb.PI554389.v2.4U.G0925100/AeUmb.PI554389.v2.6U.G0611800/AeUmb.PI554389.v2.3U.G0416200/AeUmb.PI554389.v2.7U.G0114600/AeUmb.PI554389.v2.2U.G0892100/AeUmb.PI554389.v2.7U.G0182200/AeUmb.PI554389.v2.7U.G0303200/AeUmb.PI554389.v2.5U.G0153500/AeUmb.PI554389.v2.5U.G0362500/AeUmb.PI5…	18	0.9
BP	GO:0051179	localization	339	0.339963	1.2809	0.000243798	0.00320761	0.00194736	2637	tags=53%, list=39%, signal=34%	AeUmb.PI554389.v2.1U.G0000300/AeUmb.PI554389.v2.2U.G0131000/AeUmb.PI554389.v2.7U.G1028000/AeUmb.PI554389.v2.3U.G0170100/AeUmb.PI554389.v2.5U.G0197700/AeUmb.PI554389.v2.6U.G0565000/AeUmb.PI554389.v2.5U.G0351800/AeUmb.PI554389.v2.4U.G0036800/AeUmb.PI554389.v2.3U.G0182800/AeUmb.PI554389.v2.4U.G0031800/AeUmb.PI554389.v2.4U.G0815000/AeUmb.PI554389.v2.6U.G0195800/AeUmb.PI554389.v2.3U.G0399800/AeUmb.PI5…	178	0.525074
CC	GO:0005746	mitochondrial respirasome	13	0.691019	1.88908	0.000262737	0.00326475	0.00198205	2115	tags=100%, list=31%, signal=69%	AeUmb.PI554389.v2.3U.G0547400/AeUmb.PI554389.v2.5U.G0353800/AeUmb.PI554389.v2.7U.G0200500/AeUmb.PI554389.v2.7U.G0589600/AeUmb.PI554389.v2.2U.G0030200/AeUmb.PI554389.v2.4U.G0374900/AeUmb.PI554389.v2.1U.G0423600/AeUmb.PI554389.v2.5U.G0692000/AeUmb.PI554389.v2.5U.G0180100/AeUmb.PI554389.v2.7U.G0143200/AeUmb.PI554389.v2.7U.G0677500/AeUmb.PI554389.v2.5U.G0237400/AeUmb.PI554389.v2.4U.G0932400	13	1
CC	GO:0098803	respiratory chain complex	13	0.691019	1.88908	0.000262737	0.00326475	0.00198205	2115	tags=100%, list=31%, signal=69%	AeUmb.PI554389.v2.3U.G0547400/AeUmb.PI554389.v2.5U.G0353800/AeUmb.PI554389.v2.2U.G0057300/AeUmb.PI554389.v2.7U.G0200500/AeUmb.PI554389.v2.7U.G0589600/AeUmb.PI554389.v2.2U.G0030200/AeUmb.PI554389.v2.4U.G0374900/AeUmb.PI554389.v2.1U.G0423600/AeUmb.PI554389.v2.5U.G0692000/AeUmb.PI554389.v2.7U.G0143200/AeUmb.PI554389.v2.7U.G0677500/AeUmb.PI554389.v2.5U.G0237400/AeUmb.PI554389.v2.4U.G0932400	13	1
BP	GO:0009150	purine ribonucleotide metabolic process	33	0.530785	1.69208	0.000253241	0.00326475	0.00198205	2451	tags=76%, list=36%, signal=49%	AeUmb.PI554389.v2.2U.G0182300/AeUmb.PI554389.v2.6U.G0374900/AeUmb.PI554389.v2.4U.G0248600/AeUmb.PI554389.v2.7U.G0841800/AeUmb.PI554389.v2.6U.G0263200/AeUmb.PI554389.v2.4U.G0925100/AeUmb.PI554389.v2.6U.G0611800/AeUmb.PI554389.v2.4U.G0869200/AeUmb.PI554389.v2.3U.G0416200/AeUmb.PI554389.v2.7U.G0114600/AeUmb.PI554389.v2.2U.G0892100/AeUmb.PI554389.v2.7U.G0182200/AeUmb.PI554389.v2.7U.G0532800/AeUmb.PI5…	25	0.757576
BP	GO:0043436	oxoacid metabolic process	87	0.428313	1.50055	0.000271139	0.00330789	0.00200824	1962	tags=53%, list=29%, signal=38%	AeUmb.PI554389.v2.7U.G0157700/AeUmb.PI554389.v2.7U.G0909300/AeUmb.PI554389.v2.4U.G0071000/AeUmb.PI554389.v2.5U.G0512000/AeUmb.PI554389.v2.6U.G0374900/AeUmb.PI554389.v2.6U.G0380900/AeUmb.PI554389.v2.4U.G0248600/AeUmb.PI554389.v2.7U.G0841800/AeUmb.PI554389.v2.1U.G0436800/AeUmb.PI554389.v2.6U.G0263200/AeUmb.PI554389.v2.3U.G0134300/AeUmb.PI554389.v2.3U.G0481800/AeUmb.PI554389.v2.4U.G0925100/AeUmb.PI5…	46	0.528736
BP	GO:0006753	nucleoside phosphate metabolic process	50	0.488477	1.6304	0.000284866	0.00341331	0.00207224	2568	tags=72%, list=38%, signal=45%	AeUmb.PI554389.v2.2U.G0182300/AeUmb.PI554389.v2.6U.G0374900/AeUmb.PI554389.v2.4U.G0248600/AeUmb.PI554389.v2.7U.G0841800/AeUmb.PI554389.v2.6U.G0263200/AeUmb.PI554389.v2.3U.G0276000/AeUmb.PI554389.v2.4U.G0925100/AeUmb.PI554389.v2.6U.G0611800/AeUmb.PI554389.v2.6U.G0563300/AeUmb.PI554389.v2.4U.G0869200/AeUmb.PI554389.v2.3U.G0416200/AeUmb.PI554389.v2.2U.G0222600/AeUmb.PI554389.v2.2U.G0252000/AeUmb.PI5…	36	0.72
CC	GO:0031967	organelle envelope	52	0.481595	1.61341	0.000307655	0.00354184	0.00215028	2115	tags=67%, list=31%, signal=47%	AeUmb.PI554389.v2.3U.G0547400/AeUmb.PI554389.v2.5U.G0197700/AeUmb.PI554389.v2.6U.G0565000/AeUmb.PI554389.v2.3U.G0182800/AeUmb.PI554389.v2.7U.G0988100/AeUmb.PI554389.v2.6U.G0074700/AeUmb.PI554389.v2.5U.G0353800/AeUmb.PI554389.v2.2U.G0181500/AeUmb.PI554389.v2.7U.G0200500/AeUmb.PI554389.v2.5U.G0216700/AeUmb.PI554389.v2.7U.G0589600/AeUmb.PI554389.v2.2U.G0030200/AeUmb.PI554389.v2.5U.G0437900/AeUmb.PI5…	35	0.673077
CC	GO:0031975	envelope	52	0.481595	1.61341	0.000307655	0.00354184	0.00215028	2115	tags=67%, list=31%, signal=47%	AeUmb.PI554389.v2.3U.G0547400/AeUmb.PI554389.v2.5U.G0197700/AeUmb.PI554389.v2.6U.G0565000/AeUmb.PI554389.v2.3U.G0182800/AeUmb.PI554389.v2.7U.G0988100/AeUmb.PI554389.v2.6U.G0074700/AeUmb.PI554389.v2.5U.G0353800/AeUmb.PI554389.v2.2U.G0181500/AeUmb.PI554389.v2.7U.G0200500/AeUmb.PI554389.v2.5U.G0216700/AeUmb.PI554389.v2.7U.G0589600/AeUmb.PI554389.v2.2U.G0030200/AeUmb.PI554389.v2.5U.G0437900/AeUmb.PI5…	35	0.673077
BP	GO:0071705	nitrogen compound transport	69	0.44707	1.53575	0.000316707	0.00354184	0.00215028	2151	tags=61%, list=32%, signal=42%	AeUmb.PI554389.v2.1U.G0000300/AeUmb.PI554389.v2.5U.G0197700/AeUmb.PI554389.v2.6U.G0565000/AeUmb.PI554389.v2.6U.G0195800/AeUmb.PI554389.v2.7U.G0180200/AeUmb.PI554389.v2.6U.G0588700/AeUmb.PI554389.v2.3U.G0035500/AeUmb.PI554389.v2.6U.G0443700/AeUmb.PI554389.v2.6U.G0239900/AeUmb.PI554389.v2.6U.G0447100/AeUmb.PI554389.v2.6U.G0585700/AeUmb.PI554389.v2.6U.G0236200/AeUmb.PI554389.v2.4U.G0893900/AeUmb.PI5…	42	0.608696
BP	GO:0051234	establishment of localization	337	0.340368	1.28215	0.000316707	0.00354184	0.00215028	2637	tags=53%, list=39%, signal=34%	AeUmb.PI554389.v2.1U.G0000300/AeUmb.PI554389.v2.2U.G0131000/AeUmb.PI554389.v2.7U.G1028000/AeUmb.PI554389.v2.3U.G0170100/AeUmb.PI554389.v2.5U.G0197700/AeUmb.PI554389.v2.6U.G0565000/AeUmb.PI554389.v2.5U.G0351800/AeUmb.PI554389.v2.4U.G0036800/AeUmb.PI554389.v2.3U.G0182800/AeUmb.PI554389.v2.4U.G0031800/AeUmb.PI554389.v2.4U.G0815000/AeUmb.PI554389.v2.6U.G0195800/AeUmb.PI554389.v2.3U.G0399800/AeUmb.PI5…	177	0.525223
BP	GO:0006996	organelle organization	80	0.433743	1.50959	0.000330378	0.00363416	0.00220632	2130	tags=50%, list=31%, signal=35%	AeUmb.PI554389.v2.1U.G0000300/AeUmb.PI554389.v2.3U.G0155000/AeUmb.PI554389.v2.2U.G0528700/AeUmb.PI554389.v2.5U.G0197700/AeUmb.PI554389.v2.6U.G0565000/AeUmb.PI554389.v2.5U.G0313500/AeUmb.PI554389.v2.7U.G0180200/AeUmb.PI554389.v2.6U.G0153600/AeUmb.PI554389.v2.2U.G0702300/AeUmb.PI554389.v2.2U.G0345000/AeUmb.PI554389.v2.4U.G0893900/AeUmb.PI554389.v2.7U.G0988100/AeUmb.PI554389.v2.2U.G0234200/AeUmb.PI5…	40	0.5
BP	GO:0018130	heterocycle biosynthetic process	343	0.342527	1.29093	0.000339492	0.00367418	0.00223062	3657	tags=70%, list=54%, signal=34%	AeUmb.PI554389.v2.4U.G0897300/AeUmb.PI554389.v2.2U.G0182300/AeUmb.PI554389.v2.2U.G0051000/AeUmb.PI554389.v2.4U.G0807100/AeUmb.PI554389.v2.1U.G0255100/AeUmb.PI554389.v2.6U.G0601300/AeUmb.PI554389.v2.7U.G0932000/AeUmb.PI554389.v2.3U.G0290500/AeUmb.PI554389.v2.5U.G0647100/AeUmb.PI554389.v2.5U.G0201300/AeUmb.PI554389.v2.1U.G0140800/AeUmb.PI554389.v2.1U.G0258000/AeUmb.PI554389.v2.6U.G0446200/AeUmb.PI5…	239	0.696793
BP	GO:0006810	transport	334	0.342796	1.29112	0.000357719	0.00380999	0.00231307	2637	tags=53%, list=39%, signal=34%	AeUmb.PI554389.v2.1U.G0000300/AeUmb.PI554389.v2.2U.G0131000/AeUmb.PI554389.v2.7U.G1028000/AeUmb.PI554389.v2.3U.G0170100/AeUmb.PI554389.v2.5U.G0197700/AeUmb.PI554389.v2.6U.G0565000/AeUmb.PI554389.v2.5U.G0351800/AeUmb.PI554389.v2.4U.G0036800/AeUmb.PI554389.v2.3U.G0182800/AeUmb.PI554389.v2.4U.G0031800/AeUmb.PI554389.v2.4U.G0815000/AeUmb.PI554389.v2.6U.G0195800/AeUmb.PI554389.v2.3U.G0399800/AeUmb.PI5…	176	0.526946
BP	GO:1901135	carbohydrate derivative metabolic process	72	0.440972	1.52042	0.000398731	0.00418045	0.00253798	2568	tags=64%, list=38%, signal=40%	AeUmb.PI554389.v2.2U.G0182300/AeUmb.PI554389.v2.2U.G0314200/AeUmb.PI554389.v2.6U.G0374900/AeUmb.PI554389.v2.4U.G0248600/AeUmb.PI554389.v2.7U.G0841800/AeUmb.PI554389.v2.6U.G0263200/AeUmb.PI554389.v2.4U.G0925100/AeUmb.PI554389.v2.6U.G0611800/AeUmb.PI554389.v2.3U.G0338000/AeUmb.PI554389.v2.4U.G0869200/AeUmb.PI554389.v2.3U.G0416200/AeUmb.PI554389.v2.2U.G0222600/AeUmb.PI554389.v2.1U.G0348700/AeUmb.PI5…	46	0.638889
BP	GO:0031123	RNA 3'-end processing	10	0.721218	1.85981	0.000419733	0.00425219	0.00258153	1614	tags=90%, list=24%, signal=69%	AeUmb.PI554389.v2.6U.G0176500/AeUmb.PI554389.v2.2U.G0310100/AeUmb.PI554389.v2.6U.G0412300/AeUmb.PI554389.v2.1U.G0566400/AeUmb.PI554389.v2.6U.G0432500/AeUmb.PI554389.v2.6U.G0501500/AeUmb.PI554389.v2.4U.G0871000/AeUmb.PI554389.v2.5U.G0673000/AeUmb.PI554389.v2.4U.G0908400	9	0.9
BP	GO:0007005	mitochondrion organization	10	0.720612	1.85824	0.000424586	0.00425219	0.00258153	1464	tags=90%, list=21%, signal=71%	AeUmb.PI554389.v2.5U.G0197700/AeUmb.PI554389.v2.6U.G0565000/AeUmb.PI554389.v2.6U.G0153600/AeUmb.PI554389.v2.7U.G0988100/AeUmb.PI554389.v2.1U.G0362500/AeUmb.PI554389.v2.6U.G0188600/AeUmb.PI554389.v2.1U.G0385500/AeUmb.PI554389.v2.6U.G0295400/AeUmb.PI554389.v2.1U.G0415400	9	0.9
BP	GO:0055086	nucleobase-containing small molecule metabolic process	59	0.460666	1.5613	0.000417	0.00425219	0.00258153	2568	tags=68%, list=38%, signal=43%	AeUmb.PI554389.v2.2U.G0182300/AeUmb.PI554389.v2.6U.G0374900/AeUmb.PI554389.v2.4U.G0248600/AeUmb.PI554389.v2.7U.G0841800/AeUmb.PI554389.v2.6U.G0263200/AeUmb.PI554389.v2.3U.G0276000/AeUmb.PI554389.v2.4U.G0925100/AeUmb.PI554389.v2.6U.G0611800/AeUmb.PI554389.v2.6U.G0563300/AeUmb.PI554389.v2.4U.G0869200/AeUmb.PI554389.v2.3U.G0416200/AeUmb.PI554389.v2.2U.G0222600/AeUmb.PI554389.v2.2U.G0252000/AeUmb.PI5…	40	0.677966
BP	GO:0006163	purine nucleotide metabolic process	42	0.507043	1.66109	0.000453595	0.00447592	0.00271736	2512	tags=74%, list=37%, signal=47%	AeUmb.PI554389.v2.2U.G0182300/AeUmb.PI554389.v2.6U.G0374900/AeUmb.PI554389.v2.4U.G0248600/AeUmb.PI554389.v2.7U.G0841800/AeUmb.PI554389.v2.6U.G0263200/AeUmb.PI554389.v2.4U.G0925100/AeUmb.PI554389.v2.6U.G0611800/AeUmb.PI554389.v2.4U.G0869200/AeUmb.PI554389.v2.3U.G0416200/AeUmb.PI554389.v2.2U.G0222600/AeUmb.PI554389.v2.7U.G0114600/AeUmb.PI554389.v2.5U.G0607900/AeUmb.PI554389.v2.2U.G0892100/AeUmb.PI5…	31	0.738095
BP	GO:0032787	monocarboxylic acid metabolic process	34	0.52674	1.68525	0.000573062	0.00526746	0.00319791	2451	tags=74%, list=36%, signal=47%	AeUmb.PI554389.v2.4U.G0071000/AeUmb.PI554389.v2.6U.G0374900/AeUmb.PI554389.v2.4U.G0248600/AeUmb.PI554389.v2.7U.G0841800/AeUmb.PI554389.v2.6U.G0263200/AeUmb.PI554389.v2.3U.G0481800/AeUmb.PI554389.v2.4U.G0925100/AeUmb.PI554389.v2.6U.G0611800/AeUmb.PI554389.v2.3U.G0416200/AeUmb.PI554389.v2.7U.G0861700/AeUmb.PI554389.v2.7U.G0114600/AeUmb.PI554389.v2.7U.G0510900/AeUmb.PI554389.v2.2U.G0892100/AeUmb.PI5…	25	0.735294
CC	GO:0012505	endomembrane system	34	0.526485	1.68444	0.000573062	0.00526746	0.00319791	1806	tags=65%, list=26%, signal=48%	AeUmb.PI554389.v2.1U.G0328200/AeUmb.PI554389.v2.6U.G0588700/AeUmb.PI554389.v2.6U.G0443700/AeUmb.PI554389.v2.6U.G0239900/AeUmb.PI554389.v2.3U.G0224600/AeUmb.PI554389.v2.6U.G0447100/AeUmb.PI554389.v2.5U.G0393200/AeUmb.PI554389.v2.4U.G0893900/AeUmb.PI554389.v2.1U.G0562200/AeUmb.PI554389.v2.2U.G0181500/AeUmb.PI554389.v2.3U.G0565800/AeUmb.PI554389.v2.6U.G0448900/AeUmb.PI554389.v2.2U.G0910500/AeUmb.PI5…	22	0.647059
BP	GO:0008104	protein localization	44	0.476	1.5686	0.000563442	0.00526746	0.00319791	2151	tags=64%, list=32%, signal=44%	AeUmb.PI554389.v2.1U.G0000300/AeUmb.PI554389.v2.5U.G0197700/AeUmb.PI554389.v2.6U.G0565000/AeUmb.PI554389.v2.6U.G0195800/AeUmb.PI554389.v2.7U.G0180200/AeUmb.PI554389.v2.6U.G0588700/AeUmb.PI554389.v2.3U.G0035500/AeUmb.PI554389.v2.6U.G0443700/AeUmb.PI554389.v2.6U.G0239900/AeUmb.PI554389.v2.6U.G0585700/AeUmb.PI554389.v2.4U.G0893900/AeUmb.PI554389.v2.7U.G0988100/AeUmb.PI554389.v2.7U.G0527300/AeUmb.PI5…	28	0.636364
BP	GO:0045184	establishment of protein localization	44	0.476	1.5686	0.000563442	0.00526746	0.00319791	2151	tags=64%, list=32%, signal=44%	AeUmb.PI554389.v2.1U.G0000300/AeUmb.PI554389.v2.5U.G0197700/AeUmb.PI554389.v2.6U.G0565000/AeUmb.PI554389.v2.6U.G0195800/AeUmb.PI554389.v2.7U.G0180200/AeUmb.PI554389.v2.6U.G0588700/AeUmb.PI554389.v2.3U.G0035500/AeUmb.PI554389.v2.6U.G0443700/AeUmb.PI554389.v2.6U.G0239900/AeUmb.PI554389.v2.6U.G0585700/AeUmb.PI554389.v2.4U.G0893900/AeUmb.PI554389.v2.7U.G0988100/AeUmb.PI554389.v2.7U.G0527300/AeUmb.PI5…	28	0.636364
BP	GO:0070727	cellular macromolecule localization	44	0.476	1.5686	0.000563442	0.00526746	0.00319791	2151	tags=64%, list=32%, signal=44%	AeUmb.PI554389.v2.1U.G0000300/AeUmb.PI554389.v2.5U.G0197700/AeUmb.PI554389.v2.6U.G0565000/AeUmb.PI554389.v2.6U.G0195800/AeUmb.PI554389.v2.7U.G0180200/AeUmb.PI554389.v2.6U.G0588700/AeUmb.PI554389.v2.3U.G0035500/AeUmb.PI554389.v2.6U.G0443700/AeUmb.PI554389.v2.6U.G0239900/AeUmb.PI554389.v2.6U.G0585700/AeUmb.PI554389.v2.4U.G0893900/AeUmb.PI554389.v2.7U.G0988100/AeUmb.PI554389.v2.7U.G0527300/AeUmb.PI5…	28	0.636364
BP	GO:0043933	protein-containing complex organization	75	0.435791	1.50785	0.000599908	0.0054397	0.00330248	2101	tags=53%, list=31%, signal=37%	AeUmb.PI554389.v2.3U.G0495600/AeUmb.PI554389.v2.6U.G0153600/AeUmb.PI554389.v2.2U.G0702300/AeUmb.PI554389.v2.2U.G0191900/AeUmb.PI554389.v2.5U.G0180000/AeUmb.PI554389.v2.7U.G0873500/AeUmb.PI554389.v2.2U.G0207500/AeUmb.PI554389.v2.1U.G0362500/AeUmb.PI554389.v2.5U.G0253800/AeUmb.PI554389.v2.4U.G0160900/AeUmb.PI554389.v2.2U.G0024300/AeUmb.PI554389.v2.6U.G0246900/AeUmb.PI554389.v2.7U.G0505700/AeUmb.PI5…	40	0.533333
BP	GO:0006396	RNA processing	84	0.427692	1.49511	0.000627384	0.00561299	0.00340769	3338	tags=81%, list=49%, signal=42%	AeUmb.PI554389.v2.7U.G0367200/AeUmb.PI554389.v2.2U.G0785400/AeUmb.PI554389.v2.5U.G0314300/AeUmb.PI554389.v2.7U.G0066800/AeUmb.PI554389.v2.3U.G0122500/AeUmb.PI554389.v2.7U.G0123400/AeUmb.PI554389.v2.6U.G0176500/AeUmb.PI554389.v2.2U.G0310100/AeUmb.PI554389.v2.4U.G0896300/AeUmb.PI554389.v2.6U.G0412300/AeUmb.PI554389.v2.1U.G0269200/AeUmb.PI554389.v2.3U.G0213700/AeUmb.PI554389.v2.1U.G0566400/AeUmb.PI5…	68	0.809524
BP	GO:0015031	protein transport	41	0.497216	1.62526	0.000654991	0.00578288	0.00351082	2151	tags=66%, list=32%, signal=45%	AeUmb.PI554389.v2.1U.G0000300/AeUmb.PI554389.v2.5U.G0197700/AeUmb.PI554389.v2.6U.G0565000/AeUmb.PI554389.v2.6U.G0195800/AeUmb.PI554389.v2.7U.G0180200/AeUmb.PI554389.v2.6U.G0588700/AeUmb.PI554389.v2.3U.G0035500/AeUmb.PI554389.v2.6U.G0443700/AeUmb.PI554389.v2.6U.G0239900/AeUmb.PI554389.v2.6U.G0585700/AeUmb.PI554389.v2.4U.G0893900/AeUmb.PI554389.v2.7U.G0988100/AeUmb.PI554389.v2.7U.G0527300/AeUmb.PI5…	27	0.658537
BP	GO:0006796	phosphate-containing compound metabolic process	379	0.329205	1.24439	0.000664019	0.00578645	0.00351299	3672	tags=68%, list=54%, signal=33%	AeUmb.PI554389.v2.2U.G0460800/AeUmb.PI554389.v2.6U.G0447300/AeUmb.PI554389.v2.3U.G0172800/AeUmb.PI554389.v2.2U.G0182300/AeUmb.PI554389.v2.7U.G0761300/AeUmb.PI554389.v2.1U.G0207100/AeUmb.PI554389.v2.3U.G0166400/AeUmb.PI554389.v2.1U.G0174900/AeUmb.PI554389.v2.5U.G0237300/AeUmb.PI554389.v2.2U.G0785400/AeUmb.PI554389.v2.2U.G0184700/AeUmb.PI554389.v2.4U.G0742900/AeUmb.PI554389.v2.6U.G0374900/AeUmb.PI5…	257	0.6781
BP	GO:0050794	regulation of cellular process	369	0.332403	1.25572	0.000737289	0.00634257	0.00385062	3633	tags=67%, list=53%, signal=33%	AeUmb.PI554389.v2.3U.G0155000/AeUmb.PI554389.v2.4U.G0897300/AeUmb.PI554389.v2.2U.G0051000/AeUmb.PI554389.v2.4U.G0524900/AeUmb.PI554389.v2.4U.G0807100/AeUmb.PI554389.v2.5U.G0135800/AeUmb.PI554389.v2.1U.G0207100/AeUmb.PI554389.v2.6U.G0601300/AeUmb.PI554389.v2.7U.G0932000/AeUmb.PI554389.v2.1U.G0437400/AeUmb.PI554389.v2.2U.G0751500/AeUmb.PI554389.v2.3U.G0290500/AeUmb.PI554389.v2.7U.G0066800/AeUmb.PI5…	248	0.672087
BP	GO:0072521	purine-containing compound metabolic process	46	0.486428	1.6099	0.000755757	0.00641915	0.00389711	2512	tags=72%, list=37%, signal=46%	AeUmb.PI554389.v2.2U.G0182300/AeUmb.PI554389.v2.6U.G0374900/AeUmb.PI554389.v2.4U.G0248600/AeUmb.PI554389.v2.7U.G0841800/AeUmb.PI554389.v2.6U.G0263200/AeUmb.PI554389.v2.4U.G0925100/AeUmb.PI554389.v2.6U.G0611800/AeUmb.PI554389.v2.4U.G0869200/AeUmb.PI554389.v2.3U.G0416200/AeUmb.PI554389.v2.2U.G0222600/AeUmb.PI554389.v2.7U.G0114600/AeUmb.PI554389.v2.3U.G0407300/AeUmb.PI554389.v2.5U.G0607900/AeUmb.PI5…	33	0.717391
MF	GO:0016791	phosphatase activity	69	0.434246	1.4917	0.000792241	0.00664492	0.00403418	3150	tags=80%, list=46%, signal=43%	AeUmb.PI554389.v2.7U.G0909300/AeUmb.PI554389.v2.3U.G0361900/AeUmb.PI554389.v2.3U.G0166400/AeUmb.PI554389.v2.2U.G0785400/AeUmb.PI554389.v2.7U.G0476500/AeUmb.PI554389.v2.4U.G0742900/AeUmb.PI554389.v2.1U.G0521600/AeUmb.PI554389.v2.7U.G0048700/AeUmb.PI554389.v2.7U.G0205000/AeUmb.PI554389.v2.5U.G0457800/AeUmb.PI554389.v2.6U.G0238400/AeUmb.PI554389.v2.7U.G0169900/AeUmb.PI554389.v2.2U.G0291400/AeUmb.PI5…	55	0.797101
BP	GO:0061024	membrane organization	10	0.704044	1.81552	0.000804602	0.00666528	0.00404653	1307	tags=80%, list=19%, signal=65%	AeUmb.PI554389.v2.5U.G0197700/AeUmb.PI554389.v2.6U.G0565000/AeUmb.PI554389.v2.4U.G0893900/AeUmb.PI554389.v2.7U.G0988100/AeUmb.PI554389.v2.2U.G0471200/AeUmb.PI554389.v2.5U.G0718300/AeUmb.PI554389.v2.6U.G0188600/AeUmb.PI554389.v2.6U.G0295400	8	0.8
BP	GO:1902600	proton transmembrane transport	18	0.615633	1.79413	0.00082357	0.00673921	0.00409142	1444	tags=67%, list=21%, signal=53%	AeUmb.PI554389.v2.2U.G0131000/AeUmb.PI554389.v2.7U.G1028000/AeUmb.PI554389.v2.3U.G0170100/AeUmb.PI554389.v2.4U.G0929500/AeUmb.PI554389.v2.3U.G0195000/AeUmb.PI554389.v2.2U.G0463900/AeUmb.PI554389.v2.5U.G0229400/AeUmb.PI554389.v2.3U.G0245000/AeUmb.PI554389.v2.2U.G0672700/AeUmb.PI554389.v2.1U.G0089700/AeUmb.PI554389.v2.3U.G0224900/AeUmb.PI554389.v2.5U.G0316300	12	0.666667
MF	GO:0017111	ribonucleoside triphosphate phosphatase activity	109	0.393713	1.40356	0.000847194	0.006849	0.00415807	1861	tags=46%, list=27%, signal=34%	AeUmb.PI554389.v2.7U.G0298800/AeUmb.PI554389.v2.4U.G0524900/AeUmb.PI554389.v2.1U.G0323500/AeUmb.PI554389.v2.2U.G0743100/AeUmb.PI554389.v2.3U.G0159400/AeUmb.PI554389.v2.3U.G0281900/AeUmb.PI554389.v2.6U.G0195800/AeUmb.PI554389.v2.4U.G0060400/AeUmb.PI554389.v2.1U.G0032700/AeUmb.PI554389.v2.7U.G0733000/AeUmb.PI554389.v2.6U.G0585700/AeUmb.PI554389.v2.7U.G0557000/AeUmb.PI554389.v2.4U.G1023200/AeUmb.PI5…	50	0.458716
MF	GO:0016462	pyrophosphatase activity	119	0.391409	1.40255	0.000892988	0.00713327	0.00433065	2122	tags=50%, list=31%, signal=35%	AeUmb.PI554389.v2.7U.G0298800/AeUmb.PI554389.v2.4U.G0524900/AeUmb.PI554389.v2.1U.G0323500/AeUmb.PI554389.v2.2U.G0743100/AeUmb.PI554389.v2.2U.G0785400/AeUmb.PI554389.v2.3U.G0159400/AeUmb.PI554389.v2.3U.G0281900/AeUmb.PI554389.v2.6U.G0195800/AeUmb.PI554389.v2.4U.G0060400/AeUmb.PI554389.v2.1U.G0032700/AeUmb.PI554389.v2.7U.G0733000/AeUmb.PI554389.v2.3U.G0134300/AeUmb.PI554389.v2.6U.G0585700/AeUmb.PI5…	59	0.495798
CC	GO:0005740	mitochondrial envelope	42	0.495052	1.62181	0.000929995	0.00734149	0.00445706	2262	tags=74%, list=33%, signal=50%	AeUmb.PI554389.v2.3U.G0547400/AeUmb.PI554389.v2.5U.G0197700/AeUmb.PI554389.v2.6U.G0565000/AeUmb.PI554389.v2.3U.G0182800/AeUmb.PI554389.v2.7U.G0988100/AeUmb.PI554389.v2.6U.G0074700/AeUmb.PI554389.v2.5U.G0353800/AeUmb.PI554389.v2.7U.G0200500/AeUmb.PI554389.v2.7U.G0589600/AeUmb.PI554389.v2.2U.G0030200/AeUmb.PI554389.v2.4U.G0374900/AeUmb.PI554389.v2.1U.G0423600/AeUmb.PI554389.v2.5U.G0335400/AeUmb.PI5…	31	0.738095
BP	GO:0019637	organophosphate metabolic process	87	0.410551	1.43832	0.00104007	0.00811496	0.00492665	2698	tags=66%, list=40%, signal=40%	AeUmb.PI554389.v2.2U.G0182300/AeUmb.PI554389.v2.6U.G0374900/AeUmb.PI554389.v2.1U.G0521600/AeUmb.PI554389.v2.4U.G0248600/AeUmb.PI554389.v2.7U.G0841800/AeUmb.PI554389.v2.7U.G0205000/AeUmb.PI554389.v2.6U.G0263200/AeUmb.PI554389.v2.3U.G0276000/AeUmb.PI554389.v2.3U.G0519000/AeUmb.PI554389.v2.4U.G0829600/AeUmb.PI554389.v2.1U.G0319100/AeUmb.PI554389.v2.4U.G0925100/AeUmb.PI554389.v2.6U.G0611800/AeUmb.PI5…	57	0.655172
MF	GO:0022890	inorganic cation transmembrane transporter activity	52	0.458617	1.53643	0.00111392	0.0085913	0.00521583	2056	tags=56%, list=30%, signal=39%	AeUmb.PI554389.v2.2U.G0131000/AeUmb.PI554389.v2.2U.G0182300/AeUmb.PI554389.v2.7U.G1028000/AeUmb.PI554389.v2.3U.G0170100/AeUmb.PI554389.v2.6U.G0460100/AeUmb.PI554389.v2.4U.G0815000/AeUmb.PI554389.v2.2U.G0609400/AeUmb.PI554389.v2.3U.G0449000/AeUmb.PI554389.v2.4U.G0929500/AeUmb.PI554389.v2.2U.G0158700/AeUmb.PI554389.v2.2U.G0475900/AeUmb.PI554389.v2.3U.G0195000/AeUmb.PI554389.v2.4U.G0869200/AeUmb.PI5…	29	0.557692
MF	GO:0016817	hydrolase activity, acting on acid anhydrides	120	0.38791	1.39061	0.00118733	0.00895169	0.00543463	2122	tags=49%, list=31%, signal=34%	AeUmb.PI554389.v2.7U.G0298800/AeUmb.PI554389.v2.4U.G0524900/AeUmb.PI554389.v2.1U.G0323500/AeUmb.PI554389.v2.2U.G0743100/AeUmb.PI554389.v2.2U.G0785400/AeUmb.PI554389.v2.3U.G0159400/AeUmb.PI554389.v2.3U.G0281900/AeUmb.PI554389.v2.6U.G0195800/AeUmb.PI554389.v2.4U.G0060400/AeUmb.PI554389.v2.1U.G0032700/AeUmb.PI554389.v2.7U.G0733000/AeUmb.PI554389.v2.3U.G0134300/AeUmb.PI554389.v2.6U.G0585700/AeUmb.PI5…	59	0.491667
MF	GO:0016818	hydrolase activity, acting on acid anhydrides, in phosphorus-containing anhydrides	120	0.38791	1.39061	0.00118733	0.00895169	0.00543463	2122	tags=49%, list=31%, signal=34%	AeUmb.PI554389.v2.7U.G0298800/AeUmb.PI554389.v2.4U.G0524900/AeUmb.PI554389.v2.1U.G0323500/AeUmb.PI554389.v2.2U.G0743100/AeUmb.PI554389.v2.2U.G0785400/AeUmb.PI554389.v2.3U.G0159400/AeUmb.PI554389.v2.3U.G0281900/AeUmb.PI554389.v2.6U.G0195800/AeUmb.PI554389.v2.4U.G0060400/AeUmb.PI554389.v2.1U.G0032700/AeUmb.PI554389.v2.7U.G0733000/AeUmb.PI554389.v2.3U.G0134300/AeUmb.PI554389.v2.6U.G0585700/AeUmb.PI5…	59	0.491667
BP	GO:0034654	nucleobase-containing compound biosynthetic process	318	0.335512	1.26149	0.00126096	0.00940119	0.00570752	3657	tags=69%, list=54%, signal=33%	AeUmb.PI554389.v2.4U.G0897300/AeUmb.PI554389.v2.2U.G0182300/AeUmb.PI554389.v2.2U.G0051000/AeUmb.PI554389.v2.4U.G0807100/AeUmb.PI554389.v2.6U.G0601300/AeUmb.PI554389.v2.7U.G0932000/AeUmb.PI554389.v2.3U.G0290500/AeUmb.PI554389.v2.5U.G0647100/AeUmb.PI554389.v2.5U.G0201300/AeUmb.PI554389.v2.1U.G0140800/AeUmb.PI554389.v2.1U.G0258000/AeUmb.PI554389.v2.6U.G0446200/AeUmb.PI554389.v2.7U.G0841800/AeUmb.PI5…	218	0.685535
BP	GO:0006793	phosphorus metabolic process	380	0.328947	1.24351	0.00137141	0.0101123	0.00613923	3672	tags=68%, list=54%, signal=33%	AeUmb.PI554389.v2.2U.G0460800/AeUmb.PI554389.v2.6U.G0447300/AeUmb.PI554389.v2.3U.G0172800/AeUmb.PI554389.v2.2U.G0182300/AeUmb.PI554389.v2.7U.G0761300/AeUmb.PI554389.v2.1U.G0207100/AeUmb.PI554389.v2.3U.G0166400/AeUmb.PI554389.v2.1U.G0174900/AeUmb.PI554389.v2.5U.G0237300/AeUmb.PI554389.v2.2U.G0785400/AeUmb.PI554389.v2.2U.G0184700/AeUmb.PI554389.v2.4U.G0742900/AeUmb.PI554389.v2.6U.G0374900/AeUmb.PI5…	257	0.676316
MF	GO:0015075	monoatomic ion transmembrane transporter activity	81	0.415383	1.4472	0.00144504	0.0105394	0.00639853	2350	tags=58%, list=34%, signal=38%	AeUmb.PI554389.v2.2U.G0131000/AeUmb.PI554389.v2.2U.G0182300/AeUmb.PI554389.v2.7U.G1028000/AeUmb.PI554389.v2.3U.G0170100/AeUmb.PI554389.v2.6U.G0460100/AeUmb.PI554389.v2.3U.G0182800/AeUmb.PI554389.v2.4U.G0815000/AeUmb.PI554389.v2.5U.G0618600/AeUmb.PI554389.v2.2U.G0609400/AeUmb.PI554389.v2.3U.G0449000/AeUmb.PI554389.v2.4U.G0929500/AeUmb.PI554389.v2.2U.G0158700/AeUmb.PI554389.v2.2U.G0475900/AeUmb.PI5…	47	0.580247
MF	GO:0022853	active monoatomic ion transmembrane transporter activity	21	0.56778	1.69566	0.00181708	0.0128343	0.0077918	1707	tags=67%, list=25%, signal=50%	AeUmb.PI554389.v2.2U.G0131000/AeUmb.PI554389.v2.7U.G1028000/AeUmb.PI554389.v2.3U.G0170100/AeUmb.PI554389.v2.6U.G0460100/AeUmb.PI554389.v2.4U.G0929500/AeUmb.PI554389.v2.2U.G0475900/AeUmb.PI554389.v2.3U.G0195000/AeUmb.PI554389.v2.2U.G0463900/AeUmb.PI554389.v2.5U.G0229400/AeUmb.PI554389.v2.3U.G0245000/AeUmb.PI554389.v2.2U.G0672700/AeUmb.PI554389.v2.3U.G0224900/AeUmb.PI554389.v2.5U.G0316300/AeUmb.PI5…	14	0.666667
CC	GO:0098798	mitochondrial protein-containing complex	27	0.527335	1.63613	0.00180596	0.0128343	0.0077918	2115	tags=74%, list=31%, signal=51%	AeUmb.PI554389.v2.3U.G0547400/AeUmb.PI554389.v2.5U.G0197700/AeUmb.PI554389.v2.6U.G0565000/AeUmb.PI554389.v2.7U.G0988100/AeUmb.PI554389.v2.6U.G0074700/AeUmb.PI554389.v2.5U.G0353800/AeUmb.PI554389.v2.7U.G0200500/AeUmb.PI554389.v2.7U.G0589600/AeUmb.PI554389.v2.2U.G0030200/AeUmb.PI554389.v2.4U.G0374900/AeUmb.PI554389.v2.1U.G0423600/AeUmb.PI554389.v2.5U.G0692000/AeUmb.PI554389.v2.6U.G0188600/AeUmb.PI5…	20	0.740741
BP	GO:0050789	regulation of biological process	396	0.322968	1.2223	0.00179982	0.0128343	0.0077918	3633	tags=66%, list=53%, signal=33%	AeUmb.PI554389.v2.3U.G0155000/AeUmb.PI554389.v2.4U.G0897300/AeUmb.PI554389.v2.2U.G0051000/AeUmb.PI554389.v2.4U.G0524900/AeUmb.PI554389.v2.4U.G0807100/AeUmb.PI554389.v2.5U.G0135800/AeUmb.PI554389.v2.1U.G0207100/AeUmb.PI554389.v2.6U.G0601300/AeUmb.PI554389.v2.7U.G0932000/AeUmb.PI554389.v2.1U.G0437400/AeUmb.PI554389.v2.2U.G0751500/AeUmb.PI554389.v2.3U.G0290500/AeUmb.PI554389.v2.7U.G0066800/AeUmb.PI5…	261	0.659091
BP	GO:0022904	respiratory electron transport chain	10	0.690714	1.78115	0.00191652	0.0131178	0.00796392	2115	tags=100%, list=31%, signal=69%	AeUmb.PI554389.v2.3U.G0547400/AeUmb.PI554389.v2.6U.G0309500/AeUmb.PI554389.v2.7U.G0589600/AeUmb.PI554389.v2.1U.G0423600/AeUmb.PI554389.v2.7U.G0306900/AeUmb.PI554389.v2.6U.G0293800/AeUmb.PI554389.v2.7U.G0143200/AeUmb.PI554389.v2.7U.G0677500/AeUmb.PI554389.v2.5U.G0237400/AeUmb.PI554389.v2.4U.G0932400	10	1
MF	GO:0140993	histone modifying activity	12	0.655283	1.76268	0.00188206	0.0131178	0.00796392	929	tags=58%, list=14%, signal=50%	AeUmb.PI554389.v2.2U.G0051000/AeUmb.PI554389.v2.4U.G0157900/AeUmb.PI554389.v2.2U.G0255000/AeUmb.PI554389.v2.6U.G0336700/AeUmb.PI554389.v2.6U.G0411400/AeUmb.PI554389.v2.6U.G0306600/AeUmb.PI554389.v2.7U.G0273300	7	0.583333
CC	GO:1904949	ATPase complex	17	0.593889	1.71268	0.00193542	0.0131178	0.00796392	1423	tags=65%, list=21%, signal=51%	AeUmb.PI554389.v2.2U.G0131000/AeUmb.PI554389.v2.2U.G0182300/AeUmb.PI554389.v2.3U.G0170100/AeUmb.PI554389.v2.7U.G0074000/AeUmb.PI554389.v2.5U.G0180000/AeUmb.PI554389.v2.4U.G0929500/AeUmb.PI554389.v2.3U.G0195000/AeUmb.PI554389.v2.2U.G0463900/AeUmb.PI554389.v2.5U.G0229400/AeUmb.PI554389.v2.3U.G0245000/AeUmb.PI554389.v2.3U.G0224900	11	0.647059
MF	GO:0016788	hydrolase activity, acting on ester bonds	146	0.370182	1.34178	0.00189981	0.0131178	0.00796392	3655	tags=76%, list=54%, signal=36%	AeUmb.PI554389.v2.7U.G0909300/AeUmb.PI554389.v2.3U.G0361900/AeUmb.PI554389.v2.3U.G0166400/AeUmb.PI554389.v2.2U.G0785400/AeUmb.PI554389.v2.7U.G0476500/AeUmb.PI554389.v2.4U.G0742900/AeUmb.PI554389.v2.1U.G0521600/AeUmb.PI554389.v2.7U.G0048700/AeUmb.PI554389.v2.7U.G0205000/AeUmb.PI554389.v2.6U.G0176500/AeUmb.PI554389.v2.5U.G0457800/AeUmb.PI554389.v2.6U.G0238400/AeUmb.PI554389.v2.7U.G0169900/AeUmb.PI5…	111	0.760274
BP	GO:0071702	organic substance transport	95	0.394239	1.39121	0.00197942	0.0132819	0.00806353	2151	tags=51%, list=32%, signal=35%	AeUmb.PI554389.v2.1U.G0000300/AeUmb.PI554389.v2.5U.G0197700/AeUmb.PI554389.v2.6U.G0565000/AeUmb.PI554389.v2.6U.G0195800/AeUmb.PI554389.v2.7U.G0180200/AeUmb.PI554389.v2.6U.G0588700/AeUmb.PI554389.v2.3U.G0035500/AeUmb.PI554389.v2.6U.G0443700/AeUmb.PI554389.v2.6U.G0239900/AeUmb.PI554389.v2.6U.G0447100/AeUmb.PI554389.v2.6U.G0585700/AeUmb.PI554389.v2.6U.G0236200/AeUmb.PI554389.v2.4U.G0893900/AeUmb.PI5…	48	0.505263
MF	GO:0004721	phosphoprotein phosphatase activity	38	0.481642	1.56257	0.002001	0.0132938	0.00807074	3352	tags=95%, list=49%, signal=48%	AeUmb.PI554389.v2.3U.G0166400/AeUmb.PI554389.v2.2U.G0785400/AeUmb.PI554389.v2.4U.G0742900/AeUmb.PI554389.v2.7U.G0048700/AeUmb.PI554389.v2.5U.G0457800/AeUmb.PI554389.v2.7U.G0169900/AeUmb.PI554389.v2.2U.G0291400/AeUmb.PI554389.v2.5U.G0854900/AeUmb.PI554389.v2.2U.G0225500/AeUmb.PI554389.v2.2U.G0450100/AeUmb.PI554389.v2.2U.G0253100/AeUmb.PI554389.v2.6U.G0161400/AeUmb.PI554389.v2.3U.G0161500/AeUmb.PI5…	36	0.947368
BP	GO:0016052	carbohydrate catabolic process	18	0.581888	1.69578	0.0021335	0.0140351	0.00852077	2451	tags=83%, list=36%, signal=54%	AeUmb.PI554389.v2.3U.G0344500/AeUmb.PI554389.v2.6U.G0374900/AeUmb.PI554389.v2.4U.G0248600/AeUmb.PI554389.v2.6U.G0263200/AeUmb.PI554389.v2.4U.G0925100/AeUmb.PI554389.v2.6U.G0590000/AeUmb.PI554389.v2.3U.G0416200/AeUmb.PI554389.v2.7U.G0303200/AeUmb.PI554389.v2.5U.G0153500/AeUmb.PI554389.v2.4U.G0776300/AeUmb.PI554389.v2.5U.G0393900/AeUmb.PI554389.v2.6U.G0596500/AeUmb.PI554389.v2.1U.G0580800/AeUmb.PI5…	15	0.833333
CC	GO:0098800	inner mitochondrial membrane protein complex	23	0.552896	1.67346	0.00221774	0.0144476	0.00877124	2115	tags=78%, list=31%, signal=54%	AeUmb.PI554389.v2.3U.G0547400/AeUmb.PI554389.v2.5U.G0197700/AeUmb.PI554389.v2.6U.G0565000/AeUmb.PI554389.v2.7U.G0988100/AeUmb.PI554389.v2.6U.G0074700/AeUmb.PI554389.v2.5U.G0353800/AeUmb.PI554389.v2.7U.G0200500/AeUmb.PI554389.v2.7U.G0589600/AeUmb.PI554389.v2.2U.G0030200/AeUmb.PI554389.v2.4U.G0374900/AeUmb.PI554389.v2.1U.G0423600/AeUmb.PI554389.v2.5U.G0692000/AeUmb.PI554389.v2.6U.G0188600/AeUmb.PI5…	18	0.782609
BP	GO:0034220	monoatomic ion transmembrane transport	31	0.502833	1.59088	0.00230415	0.0148662	0.00902535	1444	tags=52%, list=21%, signal=41%	AeUmb.PI554389.v2.2U.G0131000/AeUmb.PI554389.v2.7U.G1028000/AeUmb.PI554389.v2.3U.G0170100/AeUmb.PI554389.v2.3U.G0182800/AeUmb.PI554389.v2.4U.G0929500/AeUmb.PI554389.v2.2U.G0158700/AeUmb.PI554389.v2.3U.G0195000/AeUmb.PI554389.v2.2U.G0463900/AeUmb.PI554389.v2.7U.G0319200/AeUmb.PI554389.v2.5U.G0229400/AeUmb.PI554389.v2.5U.G0335400/AeUmb.PI554389.v2.3U.G0245000/AeUmb.PI554389.v2.2U.G0672700/AeUmb.PI5…	16	0.516129
BP	GO:0098662	inorganic cation transmembrane transport	29	0.512816	1.60771	0.00240698	0.0153817	0.00933836	1444	tags=52%, list=21%, signal=41%	AeUmb.PI554389.v2.2U.G0131000/AeUmb.PI554389.v2.7U.G1028000/AeUmb.PI554389.v2.3U.G0170100/AeUmb.PI554389.v2.4U.G0929500/AeUmb.PI554389.v2.2U.G0158700/AeUmb.PI554389.v2.3U.G0195000/AeUmb.PI554389.v2.2U.G0463900/AeUmb.PI554389.v2.7U.G0319200/AeUmb.PI554389.v2.5U.G0229400/AeUmb.PI554389.v2.3U.G0245000/AeUmb.PI554389.v2.2U.G0672700/AeUmb.PI554389.v2.1U.G0089700/AeUmb.PI554389.v2.2U.G0356800/AeUmb.PI5…	15	0.517241
MF	GO:0008135	translation factor activity, RNA binding	13	0.626285	1.71211	0.00249299	0.0154888	0.00940338	1531	tags=69%, list=22%, signal=54%	AeUmb.PI554389.v2.6U.G0326600/AeUmb.PI554389.v2.7U.G0981900/AeUmb.PI554389.v2.4U.G0657800/AeUmb.PI554389.v2.2U.G0207500/AeUmb.PI554389.v2.6U.G0246900/AeUmb.PI554389.v2.2U.G0144700/AeUmb.PI554389.v2.2U.G0136400/AeUmb.PI554389.v2.7U.G0874300/AeUmb.PI554389.v2.4U.G0742500	9	0.692308
MF	GO:0045182	translation regulator activity	13	0.626285	1.71211	0.00249299	0.0154888	0.00940338	1531	tags=69%, list=22%, signal=54%	AeUmb.PI554389.v2.6U.G0326600/AeUmb.PI554389.v2.7U.G0981900/AeUmb.PI554389.v2.4U.G0657800/AeUmb.PI554389.v2.2U.G0207500/AeUmb.PI554389.v2.6U.G0246900/AeUmb.PI554389.v2.2U.G0144700/AeUmb.PI554389.v2.2U.G0136400/AeUmb.PI554389.v2.7U.G0874300/AeUmb.PI554389.v2.4U.G0742500	9	0.692308
MF	GO:0090079	translation regulator activity, nucleic acid binding	13	0.626285	1.71211	0.00249299	0.0154888	0.00940338	1531	tags=69%, list=22%, signal=54%	AeUmb.PI554389.v2.6U.G0326600/AeUmb.PI554389.v2.7U.G0981900/AeUmb.PI554389.v2.4U.G0657800/AeUmb.PI554389.v2.2U.G0207500/AeUmb.PI554389.v2.6U.G0246900/AeUmb.PI554389.v2.2U.G0144700/AeUmb.PI554389.v2.2U.G0136400/AeUmb.PI554389.v2.7U.G0874300/AeUmb.PI554389.v2.4U.G0742500	9	0.692308
BP	GO:1901575	organic substance catabolic process	96	0.400825	1.41522	0.00253438	0.0156016	0.00947181	2834	tags=65%, list=42%, signal=38%	AeUmb.PI554389.v2.2U.G0100400/AeUmb.PI554389.v2.3U.G0344500/AeUmb.PI554389.v2.4U.G0825400/AeUmb.PI554389.v2.1U.G0437400/AeUmb.PI554389.v2.5U.G0481500/AeUmb.PI554389.v2.7U.G0698900/AeUmb.PI554389.v2.6U.G0374900/AeUmb.PI554389.v2.4U.G0908700/AeUmb.PI554389.v2.7U.G0264500/AeUmb.PI554389.v2.3U.G0147600/AeUmb.PI554389.v2.1U.G0244000/AeUmb.PI554389.v2.4U.G0248600/AeUmb.PI554389.v2.6U.G0263200/AeUmb.PI5…	62	0.645833
BP	GO:0033036	macromolecule localization	64	0.42654	1.45657	0.00259974	0.0158584	0.00962775	2151	tags=56%, list=32%, signal=39%	AeUmb.PI554389.v2.1U.G0000300/AeUmb.PI554389.v2.5U.G0197700/AeUmb.PI554389.v2.6U.G0565000/AeUmb.PI554389.v2.6U.G0195800/AeUmb.PI554389.v2.7U.G0180200/AeUmb.PI554389.v2.6U.G0588700/AeUmb.PI554389.v2.3U.G0035500/AeUmb.PI554389.v2.6U.G0443700/AeUmb.PI554389.v2.6U.G0239900/AeUmb.PI554389.v2.6U.G0585700/AeUmb.PI554389.v2.4U.G0893900/AeUmb.PI554389.v2.7U.G0988100/AeUmb.PI554389.v2.2U.G0471200/AeUmb.PI5…	36	0.5625
CC	GO:0016469	proton-transporting two-sector ATPase complex	14	0.60274	1.67299	0.0032005	0.0161811	0.00982364	1423	tags=64%, list=21%, signal=51%	AeUmb.PI554389.v2.2U.G0131000/AeUmb.PI554389.v2.2U.G0182300/AeUmb.PI554389.v2.3U.G0170100/AeUmb.PI554389.v2.4U.G0929500/AeUmb.PI554389.v2.3U.G0195000/AeUmb.PI554389.v2.2U.G0463900/AeUmb.PI554389.v2.5U.G0229400/AeUmb.PI554389.v2.3U.G0245000/AeUmb.PI554389.v2.3U.G0224900	9	0.642857
BP	GO:0006096	glycolytic process	14	0.601188	1.66868	0.00330374	0.0161811	0.00982364	2451	tags=86%, list=36%, signal=55%	AeUmb.PI554389.v2.6U.G0374900/AeUmb.PI554389.v2.4U.G0248600/AeUmb.PI554389.v2.6U.G0263200/AeUmb.PI554389.v2.4U.G0925100/AeUmb.PI554389.v2.3U.G0416200/AeUmb.PI554389.v2.7U.G0303200/AeUmb.PI554389.v2.5U.G0153500/AeUmb.PI554389.v2.5U.G0393900/AeUmb.PI554389.v2.6U.G0596500/AeUmb.PI554389.v2.1U.G0580800/AeUmb.PI554389.v2.3U.G0601600/AeUmb.PI554389.v2.5U.G0186900	12	0.857143
BP	GO:0006195	purine nucleotide catabolic process	14	0.601188	1.66868	0.00330374	0.0161811	0.00982364	2451	tags=86%, list=36%, signal=55%	AeUmb.PI554389.v2.6U.G0374900/AeUmb.PI554389.v2.4U.G0248600/AeUmb.PI554389.v2.6U.G0263200/AeUmb.PI554389.v2.4U.G0925100/AeUmb.PI554389.v2.3U.G0416200/AeUmb.PI554389.v2.7U.G0303200/AeUmb.PI554389.v2.5U.G0153500/AeUmb.PI554389.v2.5U.G0393900/AeUmb.PI554389.v2.6U.G0596500/AeUmb.PI554389.v2.1U.G0580800/AeUmb.PI554389.v2.3U.G0601600/AeUmb.PI554389.v2.5U.G0186900	12	0.857143
BP	GO:0009132	nucleoside diphosphate metabolic process	14	0.601188	1.66868	0.00330374	0.0161811	0.00982364	2451	tags=86%, list=36%, signal=55%	AeUmb.PI554389.v2.6U.G0374900/AeUmb.PI554389.v2.4U.G0248600/AeUmb.PI554389.v2.6U.G0263200/AeUmb.PI554389.v2.4U.G0925100/AeUmb.PI554389.v2.3U.G0416200/AeUmb.PI554389.v2.7U.G0303200/AeUmb.PI554389.v2.5U.G0153500/AeUmb.PI554389.v2.5U.G0393900/AeUmb.PI554389.v2.6U.G0596500/AeUmb.PI554389.v2.1U.G0580800/AeUmb.PI554389.v2.3U.G0601600/AeUmb.PI554389.v2.5U.G0186900	12	0.857143
BP	GO:0009134	nucleoside diphosphate catabolic process	14	0.601188	1.66868	0.00330374	0.0161811	0.00982364	2451	tags=86%, list=36%, signal=55%	AeUmb.PI554389.v2.6U.G0374900/AeUmb.PI554389.v2.4U.G0248600/AeUmb.PI554389.v2.6U.G0263200/AeUmb.PI554389.v2.4U.G0925100/AeUmb.PI554389.v2.3U.G0416200/AeUmb.PI554389.v2.7U.G0303200/AeUmb.PI554389.v2.5U.G0153500/AeUmb.PI554389.v2.5U.G0393900/AeUmb.PI554389.v2.6U.G0596500/AeUmb.PI554389.v2.1U.G0580800/AeUmb.PI554389.v2.3U.G0601600/AeUmb.PI554389.v2.5U.G0186900	12	0.857143
BP	GO:0009135	purine nucleoside diphosphate metabolic process	14	0.601188	1.66868	0.00330374	0.0161811	0.00982364	2451	tags=86%, list=36%, signal=55%	AeUmb.PI554389.v2.6U.G0374900/AeUmb.PI554389.v2.4U.G0248600/AeUmb.PI554389.v2.6U.G0263200/AeUmb.PI554389.v2.4U.G0925100/AeUmb.PI554389.v2.3U.G0416200/AeUmb.PI554389.v2.7U.G0303200/AeUmb.PI554389.v2.5U.G0153500/AeUmb.PI554389.v2.5U.G0393900/AeUmb.PI554389.v2.6U.G0596500/AeUmb.PI554389.v2.1U.G0580800/AeUmb.PI554389.v2.3U.G0601600/AeUmb.PI554389.v2.5U.G0186900	12	0.857143
BP	GO:0009137	purine nucleoside diphosphate catabolic process	14	0.601188	1.66868	0.00330374	0.0161811	0.00982364	2451	tags=86%, list=36%, signal=55%	AeUmb.PI554389.v2.6U.G0374900/AeUmb.PI554389.v2.4U.G0248600/AeUmb.PI554389.v2.6U.G0263200/AeUmb.PI554389.v2.4U.G0925100/AeUmb.PI554389.v2.3U.G0416200/AeUmb.PI554389.v2.7U.G0303200/AeUmb.PI554389.v2.5U.G0153500/AeUmb.PI554389.v2.5U.G0393900/AeUmb.PI554389.v2.6U.G0596500/AeUmb.PI554389.v2.1U.G0580800/AeUmb.PI554389.v2.3U.G0601600/AeUmb.PI554389.v2.5U.G0186900	12	0.857143
BP	GO:0009154	purine ribonucleotide catabolic process	14	0.601188	1.66868	0.00330374	0.0161811	0.00982364	2451	tags=86%, list=36%, signal=55%	AeUmb.PI554389.v2.6U.G0374900/AeUmb.PI554389.v2.4U.G0248600/AeUmb.PI554389.v2.6U.G0263200/AeUmb.PI554389.v2.4U.G0925100/AeUmb.PI554389.v2.3U.G0416200/AeUmb.PI554389.v2.7U.G0303200/AeUmb.PI554389.v2.5U.G0153500/AeUmb.PI554389.v2.5U.G0393900/AeUmb.PI554389.v2.6U.G0596500/AeUmb.PI554389.v2.1U.G0580800/AeUmb.PI554389.v2.3U.G0601600/AeUmb.PI554389.v2.5U.G0186900	12	0.857143
BP	GO:0009179	purine ribonucleoside diphosphate metabolic process	14	0.601188	1.66868	0.00330374	0.0161811	0.00982364	2451	tags=86%, list=36%, signal=55%	AeUmb.PI554389.v2.6U.G0374900/AeUmb.PI554389.v2.4U.G0248600/AeUmb.PI554389.v2.6U.G0263200/AeUmb.PI554389.v2.4U.G0925100/AeUmb.PI554389.v2.3U.G0416200/AeUmb.PI554389.v2.7U.G0303200/AeUmb.PI554389.v2.5U.G0153500/AeUmb.PI554389.v2.5U.G0393900/AeUmb.PI554389.v2.6U.G0596500/AeUmb.PI554389.v2.1U.G0580800/AeUmb.PI554389.v2.3U.G0601600/AeUmb.PI554389.v2.5U.G0186900	12	0.857143
BP	GO:0009181	purine ribonucleoside diphosphate catabolic process	14	0.601188	1.66868	0.00330374	0.0161811	0.00982364	2451	tags=86%, list=36%, signal=55%	AeUmb.PI554389.v2.6U.G0374900/AeUmb.PI554389.v2.4U.G0248600/AeUmb.PI554389.v2.6U.G0263200/AeUmb.PI554389.v2.4U.G0925100/AeUmb.PI554389.v2.3U.G0416200/AeUmb.PI554389.v2.7U.G0303200/AeUmb.PI554389.v2.5U.G0153500/AeUmb.PI554389.v2.5U.G0393900/AeUmb.PI554389.v2.6U.G0596500/AeUmb.PI554389.v2.1U.G0580800/AeUmb.PI554389.v2.3U.G0601600/AeUmb.PI554389.v2.5U.G0186900	12	0.857143
BP	GO:0009185	ribonucleoside diphosphate metabolic process	14	0.601188	1.66868	0.00330374	0.0161811	0.00982364	2451	tags=86%, list=36%, signal=55%	AeUmb.PI554389.v2.6U.G0374900/AeUmb.PI554389.v2.4U.G0248600/AeUmb.PI554389.v2.6U.G0263200/AeUmb.PI554389.v2.4U.G0925100/AeUmb.PI554389.v2.3U.G0416200/AeUmb.PI554389.v2.7U.G0303200/AeUmb.PI554389.v2.5U.G0153500/AeUmb.PI554389.v2.5U.G0393900/AeUmb.PI554389.v2.6U.G0596500/AeUmb.PI554389.v2.1U.G0580800/AeUmb.PI554389.v2.3U.G0601600/AeUmb.PI554389.v2.5U.G0186900	12	0.857143
BP	GO:0009191	ribonucleoside diphosphate catabolic process	14	0.601188	1.66868	0.00330374	0.0161811	0.00982364	2451	tags=86%, list=36%, signal=55%	AeUmb.PI554389.v2.6U.G0374900/AeUmb.PI554389.v2.4U.G0248600/AeUmb.PI554389.v2.6U.G0263200/AeUmb.PI554389.v2.4U.G0925100/AeUmb.PI554389.v2.3U.G0416200/AeUmb.PI554389.v2.7U.G0303200/AeUmb.PI554389.v2.5U.G0153500/AeUmb.PI554389.v2.5U.G0393900/AeUmb.PI554389.v2.6U.G0596500/AeUmb.PI554389.v2.1U.G0580800/AeUmb.PI554389.v2.3U.G0601600/AeUmb.PI554389.v2.5U.G0186900	12	0.857143
BP	GO:0009261	ribonucleotide catabolic process	14	0.601188	1.66868	0.00330374	0.0161811	0.00982364	2451	tags=86%, list=36%, signal=55%	AeUmb.PI554389.v2.6U.G0374900/AeUmb.PI554389.v2.4U.G0248600/AeUmb.PI554389.v2.6U.G0263200/AeUmb.PI554389.v2.4U.G0925100/AeUmb.PI554389.v2.3U.G0416200/AeUmb.PI554389.v2.7U.G0303200/AeUmb.PI554389.v2.5U.G0153500/AeUmb.PI554389.v2.5U.G0393900/AeUmb.PI554389.v2.6U.G0596500/AeUmb.PI554389.v2.1U.G0580800/AeUmb.PI554389.v2.3U.G0601600/AeUmb.PI554389.v2.5U.G0186900	12	0.857143
BP	GO:0019364	pyridine nucleotide catabolic process	14	0.601188	1.66868	0.00330374	0.0161811	0.00982364	2451	tags=86%, list=36%, signal=55%	AeUmb.PI554389.v2.6U.G0374900/AeUmb.PI554389.v2.4U.G0248600/AeUmb.PI554389.v2.6U.G0263200/AeUmb.PI554389.v2.4U.G0925100/AeUmb.PI554389.v2.3U.G0416200/AeUmb.PI554389.v2.7U.G0303200/AeUmb.PI554389.v2.5U.G0153500/AeUmb.PI554389.v2.5U.G0393900/AeUmb.PI554389.v2.6U.G0596500/AeUmb.PI554389.v2.1U.G0580800/AeUmb.PI554389.v2.3U.G0601600/AeUmb.PI554389.v2.5U.G0186900	12	0.857143
BP	GO:0046031	ADP metabolic process	14	0.601188	1.66868	0.00330374	0.0161811	0.00982364	2451	tags=86%, list=36%, signal=55%	AeUmb.PI554389.v2.6U.G0374900/AeUmb.PI554389.v2.4U.G0248600/AeUmb.PI554389.v2.6U.G0263200/AeUmb.PI554389.v2.4U.G0925100/AeUmb.PI554389.v2.3U.G0416200/AeUmb.PI554389.v2.7U.G0303200/AeUmb.PI554389.v2.5U.G0153500/AeUmb.PI554389.v2.5U.G0393900/AeUmb.PI554389.v2.6U.G0596500/AeUmb.PI554389.v2.1U.G0580800/AeUmb.PI554389.v2.3U.G0601600/AeUmb.PI554389.v2.5U.G0186900	12	0.857143
BP	GO:0046032	ADP catabolic process	14	0.601188	1.66868	0.00330374	0.0161811	0.00982364	2451	tags=86%, list=36%, signal=55%	AeUmb.PI554389.v2.6U.G0374900/AeUmb.PI554389.v2.4U.G0248600/AeUmb.PI554389.v2.6U.G0263200/AeUmb.PI554389.v2.4U.G0925100/AeUmb.PI554389.v2.3U.G0416200/AeUmb.PI554389.v2.7U.G0303200/AeUmb.PI554389.v2.5U.G0153500/AeUmb.PI554389.v2.5U.G0393900/AeUmb.PI554389.v2.6U.G0596500/AeUmb.PI554389.v2.1U.G0580800/AeUmb.PI554389.v2.3U.G0601600/AeUmb.PI554389.v2.5U.G0186900	12	0.857143
BP	GO:0072523	purine-containing compound catabolic process	14	0.601188	1.66868	0.00330374	0.0161811	0.00982364	2451	tags=86%, list=36%, signal=55%	AeUmb.PI554389.v2.6U.G0374900/AeUmb.PI554389.v2.4U.G0248600/AeUmb.PI554389.v2.6U.G0263200/AeUmb.PI554389.v2.4U.G0925100/AeUmb.PI554389.v2.3U.G0416200/AeUmb.PI554389.v2.7U.G0303200/AeUmb.PI554389.v2.5U.G0153500/AeUmb.PI554389.v2.5U.G0393900/AeUmb.PI554389.v2.6U.G0596500/AeUmb.PI554389.v2.1U.G0580800/AeUmb.PI554389.v2.3U.G0601600/AeUmb.PI554389.v2.5U.G0186900	12	0.857143
BP	GO:0072526	pyridine-containing compound catabolic process	14	0.601188	1.66868	0.00330374	0.0161811	0.00982364	2451	tags=86%, list=36%, signal=55%	AeUmb.PI554389.v2.6U.G0374900/AeUmb.PI554389.v2.4U.G0248600/AeUmb.PI554389.v2.6U.G0263200/AeUmb.PI554389.v2.4U.G0925100/AeUmb.PI554389.v2.3U.G0416200/AeUmb.PI554389.v2.7U.G0303200/AeUmb.PI554389.v2.5U.G0153500/AeUmb.PI554389.v2.5U.G0393900/AeUmb.PI554389.v2.6U.G0596500/AeUmb.PI554389.v2.1U.G0580800/AeUmb.PI554389.v2.3U.G0601600/AeUmb.PI554389.v2.5U.G0186900	12	0.857143
MF	GO:0003755	peptidyl-prolyl cis-trans isomerase activity	19	0.562392	1.65227	0.00324412	0.0161811	0.00982364	1810	tags=68%, list=27%, signal=50%	AeUmb.PI554389.v2.6U.G0383600/AeUmb.PI554389.v2.7U.G0363800/AeUmb.PI554389.v2.2U.G0118600/AeUmb.PI554389.v2.7U.G0344100/AeUmb.PI554389.v2.2U.G0177100/AeUmb.PI554389.v2.5U.G0247900/AeUmb.PI554389.v2.2U.G0812400/AeUmb.PI554389.v2.6U.G0615900/AeUmb.PI554389.v2.5U.G0925400/AeUmb.PI554389.v2.7U.G1062100/AeUmb.PI554389.v2.2U.G0553300/AeUmb.PI554389.v2.4U.G0835900/AeUmb.PI554389.v2.3U.G0179800	13	0.684211
MF	GO:0016859	cis-trans isomerase activity	19	0.562392	1.65227	0.00324412	0.0161811	0.00982364	1810	tags=68%, list=27%, signal=50%	AeUmb.PI554389.v2.6U.G0383600/AeUmb.PI554389.v2.7U.G0363800/AeUmb.PI554389.v2.2U.G0118600/AeUmb.PI554389.v2.7U.G0344100/AeUmb.PI554389.v2.2U.G0177100/AeUmb.PI554389.v2.5U.G0247900/AeUmb.PI554389.v2.2U.G0812400/AeUmb.PI554389.v2.6U.G0615900/AeUmb.PI554389.v2.5U.G0925400/AeUmb.PI554389.v2.7U.G1062100/AeUmb.PI554389.v2.2U.G0553300/AeUmb.PI554389.v2.4U.G0835900/AeUmb.PI554389.v2.3U.G0179800	13	0.684211
BP	GO:0009165	nucleotide biosynthetic process	25	0.532699	1.63329	0.00321673	0.0161811	0.00982364	1341	tags=56%, list=20%, signal=45%	AeUmb.PI554389.v2.2U.G0182300/AeUmb.PI554389.v2.7U.G0841800/AeUmb.PI554389.v2.3U.G0276000/AeUmb.PI554389.v2.6U.G0611800/AeUmb.PI554389.v2.6U.G0563300/AeUmb.PI554389.v2.4U.G0869200/AeUmb.PI554389.v2.2U.G0252000/AeUmb.PI554389.v2.7U.G0114600/AeUmb.PI554389.v2.5U.G0607900/AeUmb.PI554389.v2.2U.G0892100/AeUmb.PI554389.v2.7U.G0182200/AeUmb.PI554389.v2.7U.G0532800/AeUmb.PI554389.v2.4U.G0030900/AeUmb.PI5…	14	0.56
BP	GO:1901293	nucleoside phosphate biosynthetic process	25	0.532699	1.63329	0.00321673	0.0161811	0.00982364	1341	tags=56%, list=20%, signal=45%	AeUmb.PI554389.v2.2U.G0182300/AeUmb.PI554389.v2.7U.G0841800/AeUmb.PI554389.v2.3U.G0276000/AeUmb.PI554389.v2.6U.G0611800/AeUmb.PI554389.v2.6U.G0563300/AeUmb.PI554389.v2.4U.G0869200/AeUmb.PI554389.v2.2U.G0252000/AeUmb.PI554389.v2.7U.G0114600/AeUmb.PI554389.v2.5U.G0607900/AeUmb.PI554389.v2.2U.G0892100/AeUmb.PI554389.v2.7U.G0182200/AeUmb.PI554389.v2.7U.G0532800/AeUmb.PI554389.v2.4U.G0030900/AeUmb.PI5…	14	0.56
BP	GO:0016192	vesicle-mediated transport	37	0.476222	1.54007	0.00330231	0.0161811	0.00982364	2151	tags=59%, list=32%, signal=41%	AeUmb.PI554389.v2.3U.G0399800/AeUmb.PI554389.v2.6U.G0466400/AeUmb.PI554389.v2.3U.G0224600/AeUmb.PI554389.v2.4U.G0990000/AeUmb.PI554389.v2.5U.G0393200/AeUmb.PI554389.v2.4U.G0893900/AeUmb.PI554389.v2.2U.G0791300/AeUmb.PI554389.v2.6U.G0687000/AeUmb.PI554389.v2.2U.G0648700/AeUmb.PI554389.v2.6U.G0425200/AeUmb.PI554389.v2.7U.G0165500/AeUmb.PI554389.v2.5U.G0770200/AeUmb.PI554389.v2.4U.G0791100/AeUmb.PI5…	22	0.594595
BP	GO:0015979	photosynthesis	39	0.472047	1.53541	0.00310124	0.0161811	0.00982364	2549	tags=67%, list=37%, signal=42%	AeUmb.PI554389.v2.2U.G0191900/AeUmb.PI554389.v2.2U.G0191100/AeUmb.PI554389.v2.6U.G0493400/AeUmb.PI554389.v2.2U.G0122500/AeUmb.PI554389.v2.2U.G0341200/AeUmb.PI554389.v2.4U.G0047600/AeUmb.PI554389.v2.5U.G0437900/AeUmb.PI554389.v2.2U.G0683900/AeUmb.PI554389.v2.2U.G0139500/AeUmb.PI554389.v2.7U.G0081500/AeUmb.PI554389.v2.1U.G0522800/AeUmb.PI554389.v2.2U.G0366900/AeUmb.PI554389.v2.7U.G0966200/AeUmb.PI5…	26	0.666667
MF	GO:0042578	phosphoric ester hydrolase activity	81	0.404586	1.40958	0.00269973	0.0161811	0.00982364	3610	tags=84%, list=53%, signal=40%	AeUmb.PI554389.v2.7U.G0909300/AeUmb.PI554389.v2.3U.G0361900/AeUmb.PI554389.v2.3U.G0166400/AeUmb.PI554389.v2.2U.G0785400/AeUmb.PI554389.v2.7U.G0476500/AeUmb.PI554389.v2.4U.G0742900/AeUmb.PI554389.v2.1U.G0521600/AeUmb.PI554389.v2.7U.G0048700/AeUmb.PI554389.v2.7U.G0205000/AeUmb.PI554389.v2.5U.G0457800/AeUmb.PI554389.v2.6U.G0238400/AeUmb.PI554389.v2.7U.G0169900/AeUmb.PI554389.v2.2U.G0291400/AeUmb.PI5…	68	0.839506
CC	GO:0005634	nucleus	131	0.372189	1.34168	0.00309969	0.0161811	0.00982364	3592	tags=78%, list=53%, signal=38%	AeUmb.PI554389.v2.3U.G0155000/AeUmb.PI554389.v2.7U.G0066800/AeUmb.PI554389.v2.5U.G0647100/AeUmb.PI554389.v2.4U.G0157900/AeUmb.PI554389.v2.5U.G0344700/AeUmb.PI554389.v2.7U.G0074000/AeUmb.PI554389.v2.7U.G0496800/AeUmb.PI554389.v2.7U.G0035100/AeUmb.PI554389.v2.7U.G0123400/AeUmb.PI554389.v2.4U.G0896300/AeUmb.PI554389.v2.5U.G0180000/AeUmb.PI554389.v2.1U.G0557300/AeUmb.PI554389.v2.6U.G0412300/AeUmb.PI5…	102	0.778626
BP	GO:0043412	macromolecule modification	414	0.319466	1.21088	0.00279972	0.0161811	0.00982364	3951	tags=71%, list=58%, signal=32%	AeUmb.PI554389.v2.2U.G0460800/AeUmb.PI554389.v2.6U.G0447300/AeUmb.PI554389.v2.3U.G0172800/AeUmb.PI554389.v2.2U.G0291700/AeUmb.PI554389.v2.7U.G0761300/AeUmb.PI554389.v2.3U.G0166400/AeUmb.PI554389.v2.1U.G0174900/AeUmb.PI554389.v2.5U.G0237300/AeUmb.PI554389.v2.2U.G0314200/AeUmb.PI554389.v2.2U.G0785400/AeUmb.PI554389.v2.7U.G0066800/AeUmb.PI554389.v2.4U.G1016400/AeUmb.PI554389.v2.2U.G0184700/AeUmb.PI5…	294	0.710145
BP	GO:1901566	organonitrogen compound biosynthetic process	153	0.363426	1.32128	0.00339966	0.0165302	0.0100356	3669	tags=75%, list=54%, signal=35%	AeUmb.PI554389.v2.7U.G0909300/AeUmb.PI554389.v2.2U.G0182300/AeUmb.PI554389.v2.6U.G0326600/AeUmb.PI554389.v2.1U.G0255100/AeUmb.PI554389.v2.2U.G0314200/AeUmb.PI554389.v2.5U.G0190400/AeUmb.PI554389.v2.5U.G0056200/AeUmb.PI554389.v2.7U.G0981900/AeUmb.PI554389.v2.7U.G0841800/AeUmb.PI554389.v2.1U.G0436800/AeUmb.PI554389.v2.3U.G0134300/AeUmb.PI554389.v2.6U.G0491000/AeUmb.PI554389.v2.2U.G0207500/AeUmb.PI5…	114	0.745098
BP	GO:0009199	ribonucleoside triphosphate metabolic process	23	0.535772	1.62163	0.00352823	0.0169103	0.0102663	2698	tags=78%, list=40%, signal=47%	AeUmb.PI554389.v2.2U.G0182300/AeUmb.PI554389.v2.6U.G0374900/AeUmb.PI554389.v2.4U.G0248600/AeUmb.PI554389.v2.6U.G0263200/AeUmb.PI554389.v2.4U.G0925100/AeUmb.PI554389.v2.4U.G0869200/AeUmb.PI554389.v2.3U.G0416200/AeUmb.PI554389.v2.7U.G0303200/AeUmb.PI554389.v2.3U.G0245000/AeUmb.PI554389.v2.5U.G0153500/AeUmb.PI554389.v2.4U.G0030900/AeUmb.PI554389.v2.6U.G0598500/AeUmb.PI554389.v2.5U.G0393900/AeUmb.PI5…	18	0.782609
BP	GO:0070887	cellular response to chemical stimulus	30	0.499847	1.57494	0.00350666	0.0169103	0.0102663	2631	tags=77%, list=39%, signal=47%	AeUmb.PI554389.v2.7U.G0932000/AeUmb.PI554389.v2.2U.G0751500/AeUmb.PI554389.v2.6U.G0810800/AeUmb.PI554389.v2.6U.G0230300/AeUmb.PI554389.v2.6U.G0283900/AeUmb.PI554389.v2.7U.G0048700/AeUmb.PI554389.v2.4U.G0944100/AeUmb.PI554389.v2.4U.G0246200/AeUmb.PI554389.v2.6U.G0397100/AeUmb.PI554389.v2.3U.G0596600/AeUmb.PI554389.v2.3U.G0125500/AeUmb.PI554389.v2.6U.G0581300/AeUmb.PI554389.v2.3U.G0041700/AeUmb.PI5…	23	0.766667
BP	GO:0036211	protein modification process	383	0.319115	1.20676	0.00359964	0.0171302	0.0103999	3672	tags=66%, list=54%, signal=32%	AeUmb.PI554389.v2.2U.G0460800/AeUmb.PI554389.v2.6U.G0447300/AeUmb.PI554389.v2.3U.G0172800/AeUmb.PI554389.v2.2U.G0291700/AeUmb.PI554389.v2.7U.G0761300/AeUmb.PI554389.v2.3U.G0166400/AeUmb.PI554389.v2.1U.G0174900/AeUmb.PI554389.v2.5U.G0237300/AeUmb.PI554389.v2.2U.G0314200/AeUmb.PI554389.v2.2U.G0785400/AeUmb.PI554389.v2.4U.G1016400/AeUmb.PI554389.v2.2U.G0184700/AeUmb.PI554389.v2.4U.G0742900/AeUmb.PI5…	252	0.657963
BP	GO:0045333	cellular respiration	16	0.579426	1.65234	0.0037813	0.017868	0.0108478	2696	tags=94%, list=40%, signal=57%	AeUmb.PI554389.v2.3U.G0547400/AeUmb.PI554389.v2.3U.G0063200/AeUmb.PI554389.v2.6U.G0309500/AeUmb.PI554389.v2.7U.G0589600/AeUmb.PI554389.v2.1U.G0423600/AeUmb.PI554389.v2.7U.G0306900/AeUmb.PI554389.v2.3U.G0306300/AeUmb.PI554389.v2.6U.G0293800/AeUmb.PI554389.v2.7U.G0143200/AeUmb.PI554389.v2.7U.G0677500/AeUmb.PI554389.v2.5U.G0237400/AeUmb.PI554389.v2.4U.G0932400/AeUmb.PI554389.v2.6U.G0451400/AeUmb.PI5…	15	0.9375
BP	GO:0051716	cellular response to stimulus	143	0.363918	1.31775	0.0039996	0.0187674	0.0113938	2755	tags=55%, list=40%, signal=34%	AeUmb.PI554389.v2.4U.G0524900/AeUmb.PI554389.v2.5U.G0135800/AeUmb.PI554389.v2.7U.G0932000/AeUmb.PI554389.v2.2U.G0751500/AeUmb.PI554389.v2.6U.G0810800/AeUmb.PI554389.v2.6U.G0230300/AeUmb.PI554389.v2.6U.G0283900/AeUmb.PI554389.v2.7U.G0048700/AeUmb.PI554389.v2.4U.G0944100/AeUmb.PI554389.v2.4U.G0246200/AeUmb.PI554389.v2.7U.G0035100/AeUmb.PI554389.v2.6U.G0397100/AeUmb.PI554389.v2.3U.G0596600/AeUmb.PI5…	79	0.552448
BP	GO:0072524	pyridine-containing compound metabolic process	25	0.524687	1.60873	0.00412143	0.0192047	0.0116593	2512	tags=80%, list=37%, signal=51%	AeUmb.PI554389.v2.6U.G0374900/AeUmb.PI554389.v2.4U.G0248600/AeUmb.PI554389.v2.6U.G0263200/AeUmb.PI554389.v2.6U.G0491000/AeUmb.PI554389.v2.4U.G0925100/AeUmb.PI554389.v2.5U.G0894600/AeUmb.PI554389.v2.3U.G0416200/AeUmb.PI554389.v2.2U.G0222600/AeUmb.PI554389.v2.5U.G0607900/AeUmb.PI554389.v2.7U.G0303200/AeUmb.PI554389.v2.5U.G0153500/AeUmb.PI554389.v2.5U.G0481300/AeUmb.PI554389.v2.3U.G0359100/AeUmb.PI5…	20	0.8
BP	GO:0015931	nucleobase-containing compound transport	12	0.625654	1.68298	0.00418235	0.0193008	0.0117176	1807	tags=83%, list=27%, signal=61%	AeUmb.PI554389.v2.6U.G0447100/AeUmb.PI554389.v2.5U.G0318500/AeUmb.PI554389.v2.6U.G0227800/AeUmb.PI554389.v2.6U.G0385200/AeUmb.PI554389.v2.3U.G0143000/AeUmb.PI554389.v2.7U.G1004300/AeUmb.PI554389.v2.1U.G0404100/AeUmb.PI554389.v2.4U.G0159300/AeUmb.PI554389.v2.4U.G0866500/AeUmb.PI554389.v2.3U.G0131200	10	0.833333
BP	GO:0031323	regulation of cellular metabolic process	289	0.328797	1.23128	0.00419958	0.0193008	0.0117176	3633	tags=67%, list=53%, signal=33%	AeUmb.PI554389.v2.4U.G0897300/AeUmb.PI554389.v2.2U.G0051000/AeUmb.PI554389.v2.4U.G0807100/AeUmb.PI554389.v2.1U.G0207100/AeUmb.PI554389.v2.6U.G0601300/AeUmb.PI554389.v2.7U.G0932000/AeUmb.PI554389.v2.1U.G0437400/AeUmb.PI554389.v2.3U.G0290500/AeUmb.PI554389.v2.7U.G0066800/AeUmb.PI554389.v2.5U.G0647100/AeUmb.PI554389.v2.7U.G0698900/AeUmb.PI554389.v2.5U.G0201300/AeUmb.PI554389.v2.1U.G0140800/AeUmb.PI5…	194	0.67128
BP	GO:0019362	pyridine nucleotide metabolic process	22	0.543576	1.63581	0.00443593	0.019712	0.0119673	2512	tags=82%, list=37%, signal=52%	AeUmb.PI554389.v2.6U.G0374900/AeUmb.PI554389.v2.4U.G0248600/AeUmb.PI554389.v2.6U.G0263200/AeUmb.PI554389.v2.4U.G0925100/AeUmb.PI554389.v2.3U.G0416200/AeUmb.PI554389.v2.2U.G0222600/AeUmb.PI554389.v2.5U.G0607900/AeUmb.PI554389.v2.7U.G0303200/AeUmb.PI554389.v2.5U.G0153500/AeUmb.PI554389.v2.5U.G0481300/AeUmb.PI554389.v2.3U.G0359100/AeUmb.PI554389.v2.5U.G0393900/AeUmb.PI554389.v2.6U.G0596500/AeUmb.PI5…	18	0.818182
BP	GO:0046496	nicotinamide nucleotide metabolic process	22	0.543576	1.63581	0.00443593	0.019712	0.0119673	2512	tags=82%, list=37%, signal=52%	AeUmb.PI554389.v2.6U.G0374900/AeUmb.PI554389.v2.4U.G0248600/AeUmb.PI554389.v2.6U.G0263200/AeUmb.PI554389.v2.4U.G0925100/AeUmb.PI554389.v2.3U.G0416200/AeUmb.PI554389.v2.2U.G0222600/AeUmb.PI554389.v2.5U.G0607900/AeUmb.PI554389.v2.7U.G0303200/AeUmb.PI554389.v2.5U.G0153500/AeUmb.PI554389.v2.5U.G0481300/AeUmb.PI554389.v2.3U.G0359100/AeUmb.PI554389.v2.5U.G0393900/AeUmb.PI554389.v2.6U.G0596500/AeUmb.PI5…	18	0.818182
MF	GO:0140098	catalytic activity, acting on RNA	51	0.43917	1.46858	0.00440044	0.019712	0.0119673	1583	tags=45%, list=23%, signal=35%	AeUmb.PI554389.v2.2U.G0785400/AeUmb.PI554389.v2.5U.G0190400/AeUmb.PI554389.v2.4U.G0908700/AeUmb.PI554389.v2.7U.G0876200/AeUmb.PI554389.v2.6U.G0176500/AeUmb.PI554389.v2.5U.G0294400/AeUmb.PI554389.v2.3U.G0213700/AeUmb.PI554389.v2.3U.G0006100/AeUmb.PI554389.v2.5U.G0211800/AeUmb.PI554389.v2.5U.G0304100/AeUmb.PI554389.v2.3U.G0347200/AeUmb.PI554389.v2.6U.G0175200/AeUmb.PI554389.v2.1U.G0228600/AeUmb.PI5…	23	0.45098
BP	GO:0006351	DNA-templated transcription	288	0.329337	1.23311	0.00439956	0.019712	0.0119673	3633	tags=67%, list=53%, signal=33%	AeUmb.PI554389.v2.4U.G0897300/AeUmb.PI554389.v2.2U.G0051000/AeUmb.PI554389.v2.4U.G0807100/AeUmb.PI554389.v2.6U.G0601300/AeUmb.PI554389.v2.7U.G0932000/AeUmb.PI554389.v2.3U.G0290500/AeUmb.PI554389.v2.5U.G0647100/AeUmb.PI554389.v2.5U.G0201300/AeUmb.PI554389.v2.1U.G0140800/AeUmb.PI554389.v2.1U.G0258000/AeUmb.PI554389.v2.6U.G0446200/AeUmb.PI554389.v2.7U.G0496800/AeUmb.PI554389.v2.1U.G0225000/AeUmb.PI5…	194	0.673611
BP	GO:0032774	RNA biosynthetic process	288	0.329337	1.23311	0.00439956	0.019712	0.0119673	3633	tags=67%, list=53%, signal=33%	AeUmb.PI554389.v2.4U.G0897300/AeUmb.PI554389.v2.2U.G0051000/AeUmb.PI554389.v2.4U.G0807100/AeUmb.PI554389.v2.6U.G0601300/AeUmb.PI554389.v2.7U.G0932000/AeUmb.PI554389.v2.3U.G0290500/AeUmb.PI554389.v2.5U.G0647100/AeUmb.PI554389.v2.5U.G0201300/AeUmb.PI554389.v2.1U.G0140800/AeUmb.PI554389.v2.1U.G0258000/AeUmb.PI554389.v2.6U.G0446200/AeUmb.PI554389.v2.7U.G0496800/AeUmb.PI554389.v2.1U.G0225000/AeUmb.PI5…	194	0.673611
BP	GO:0006470	protein dephosphorylation	34	0.477099	1.52643	0.0046046	0.0203269	0.0123406	3352	tags=94%, list=49%, signal=48%	AeUmb.PI554389.v2.3U.G0166400/AeUmb.PI554389.v2.2U.G0785400/AeUmb.PI554389.v2.4U.G0742900/AeUmb.PI554389.v2.7U.G0048700/AeUmb.PI554389.v2.7U.G0169900/AeUmb.PI554389.v2.2U.G0291400/AeUmb.PI554389.v2.5U.G0854900/AeUmb.PI554389.v2.2U.G0225500/AeUmb.PI554389.v2.2U.G0450100/AeUmb.PI554389.v2.3U.G0161500/AeUmb.PI554389.v2.4U.G0031000/AeUmb.PI554389.v2.6U.G0104600/AeUmb.PI554389.v2.6U.G0711100/AeUmb.PI5…	32	0.941176
BP	GO:0065007	biological regulation	416	0.316507	1.19985	0.00469953	0.0206104	0.0125127	3657	tags=66%, list=54%, signal=32%	AeUmb.PI554389.v2.3U.G0155000/AeUmb.PI554389.v2.4U.G0897300/AeUmb.PI554389.v2.2U.G0051000/AeUmb.PI554389.v2.4U.G0524900/AeUmb.PI554389.v2.4U.G0807100/AeUmb.PI554389.v2.5U.G0135800/AeUmb.PI554389.v2.1U.G0207100/AeUmb.PI554389.v2.6U.G0601300/AeUmb.PI554389.v2.7U.G0932000/AeUmb.PI554389.v2.1U.G0437400/AeUmb.PI554389.v2.2U.G0751500/AeUmb.PI554389.v2.3U.G0290500/AeUmb.PI554389.v2.7U.G0066800/AeUmb.PI5…	273	0.65625
MF	GO:0015318	inorganic molecular entity transmembrane transporter activity	61	0.417395	1.41941	0.0054	0.0235286	0.0142843	2078	tags=52%, list=30%, signal=37%	AeUmb.PI554389.v2.2U.G0131000/AeUmb.PI554389.v2.2U.G0182300/AeUmb.PI554389.v2.7U.G1028000/AeUmb.PI554389.v2.3U.G0170100/AeUmb.PI554389.v2.6U.G0460100/AeUmb.PI554389.v2.4U.G0815000/AeUmb.PI554389.v2.2U.G0609400/AeUmb.PI554389.v2.3U.G0449000/AeUmb.PI554389.v2.4U.G0929500/AeUmb.PI554389.v2.2U.G0158700/AeUmb.PI554389.v2.2U.G0475900/AeUmb.PI554389.v2.4U.G0710500/AeUmb.PI554389.v2.3U.G0195000/AeUmb.PI5…	32	0.52459
BP	GO:0098660	inorganic ion transmembrane transport	30	0.493557	1.55513	0.00551047	0.023855	0.0144825	1444	tags=50%, list=21%, signal=40%	AeUmb.PI554389.v2.2U.G0131000/AeUmb.PI554389.v2.7U.G1028000/AeUmb.PI554389.v2.3U.G0170100/AeUmb.PI554389.v2.4U.G0929500/AeUmb.PI554389.v2.2U.G0158700/AeUmb.PI554389.v2.3U.G0195000/AeUmb.PI554389.v2.2U.G0463900/AeUmb.PI554389.v2.7U.G0319200/AeUmb.PI554389.v2.5U.G0229400/AeUmb.PI554389.v2.3U.G0245000/AeUmb.PI554389.v2.2U.G0672700/AeUmb.PI554389.v2.1U.G0089700/AeUmb.PI554389.v2.2U.G0356800/AeUmb.PI5…	15	0.5
BP	GO:0022900	electron transport chain	22	0.533706	1.60611	0.00584736	0.0249452	0.0151444	2549	tags=77%, list=37%, signal=49%	AeUmb.PI554389.v2.3U.G0547400/AeUmb.PI554389.v2.6U.G0309500/AeUmb.PI554389.v2.7U.G0589600/AeUmb.PI554389.v2.5U.G0507300/AeUmb.PI554389.v2.2U.G0096000/AeUmb.PI554389.v2.1U.G0423600/AeUmb.PI554389.v2.7U.G0306900/AeUmb.PI554389.v2.6U.G0293800/AeUmb.PI554389.v2.6U.G0279300/AeUmb.PI554389.v2.7U.G0143200/AeUmb.PI554389.v2.7U.G0677500/AeUmb.PI554389.v2.4U.G0953200/AeUmb.PI554389.v2.5U.G0237400/AeUmb.PI5…	17	0.772727
BP	GO:0009144	purine nucleoside triphosphate metabolic process	22	0.531952	1.60083	0.00594818	0.0249452	0.0151444	2698	tags=77%, list=40%, signal=47%	AeUmb.PI554389.v2.2U.G0182300/AeUmb.PI554389.v2.6U.G0374900/AeUmb.PI554389.v2.4U.G0248600/AeUmb.PI554389.v2.6U.G0263200/AeUmb.PI554389.v2.4U.G0925100/AeUmb.PI554389.v2.4U.G0869200/AeUmb.PI554389.v2.3U.G0416200/AeUmb.PI554389.v2.7U.G0303200/AeUmb.PI554389.v2.3U.G0245000/AeUmb.PI554389.v2.5U.G0153500/AeUmb.PI554389.v2.6U.G0598500/AeUmb.PI554389.v2.5U.G0393900/AeUmb.PI554389.v2.6U.G0596500/AeUmb.PI5…	17	0.772727
BP	GO:0009205	purine ribonucleoside triphosphate metabolic process	22	0.531952	1.60083	0.00594818	0.0249452	0.0151444	2698	tags=77%, list=40%, signal=47%	AeUmb.PI554389.v2.2U.G0182300/AeUmb.PI554389.v2.6U.G0374900/AeUmb.PI554389.v2.4U.G0248600/AeUmb.PI554389.v2.6U.G0263200/AeUmb.PI554389.v2.4U.G0925100/AeUmb.PI554389.v2.4U.G0869200/AeUmb.PI554389.v2.3U.G0416200/AeUmb.PI554389.v2.7U.G0303200/AeUmb.PI554389.v2.3U.G0245000/AeUmb.PI554389.v2.5U.G0153500/AeUmb.PI554389.v2.6U.G0598500/AeUmb.PI554389.v2.5U.G0393900/AeUmb.PI554389.v2.6U.G0596500/AeUmb.PI5…	17	0.772727
BP	GO:0046034	ATP metabolic process	22	0.531952	1.60083	0.00594818	0.0249452	0.0151444	2698	tags=77%, list=40%, signal=47%	AeUmb.PI554389.v2.2U.G0182300/AeUmb.PI554389.v2.6U.G0374900/AeUmb.PI554389.v2.4U.G0248600/AeUmb.PI554389.v2.6U.G0263200/AeUmb.PI554389.v2.4U.G0925100/AeUmb.PI554389.v2.4U.G0869200/AeUmb.PI554389.v2.3U.G0416200/AeUmb.PI554389.v2.7U.G0303200/AeUmb.PI554389.v2.3U.G0245000/AeUmb.PI554389.v2.5U.G0153500/AeUmb.PI554389.v2.6U.G0598500/AeUmb.PI554389.v2.5U.G0393900/AeUmb.PI554389.v2.6U.G0596500/AeUmb.PI5…	17	0.772727
BP	GO:0098655	monoatomic cation transmembrane transport	28	0.499578	1.55807	0.00581629	0.0249452	0.0151444	1444	tags=50%, list=21%, signal=40%	AeUmb.PI554389.v2.2U.G0131000/AeUmb.PI554389.v2.7U.G1028000/AeUmb.PI554389.v2.3U.G0170100/AeUmb.PI554389.v2.4U.G0929500/AeUmb.PI554389.v2.2U.G0158700/AeUmb.PI554389.v2.3U.G0195000/AeUmb.PI554389.v2.2U.G0463900/AeUmb.PI554389.v2.7U.G0319200/AeUmb.PI554389.v2.5U.G0229400/AeUmb.PI554389.v2.3U.G0245000/AeUmb.PI554389.v2.2U.G0672700/AeUmb.PI554389.v2.1U.G0089700/AeUmb.PI554389.v2.3U.G0224900/AeUmb.PI5…	14	0.5
BP	GO:0016311	dephosphorylation	42	0.452189	1.48139	0.00610183	0.0254306	0.0154391	3352	tags=90%, list=49%, signal=46%	AeUmb.PI554389.v2.1U.G0207100/AeUmb.PI554389.v2.3U.G0166400/AeUmb.PI554389.v2.2U.G0785400/AeUmb.PI554389.v2.4U.G0742900/AeUmb.PI554389.v2.1U.G0521600/AeUmb.PI554389.v2.7U.G0048700/AeUmb.PI554389.v2.7U.G0205000/AeUmb.PI554389.v2.7U.G0169900/AeUmb.PI554389.v2.2U.G0291400/AeUmb.PI554389.v2.5U.G0854900/AeUmb.PI554389.v2.2U.G0225500/AeUmb.PI554389.v2.2U.G0450100/AeUmb.PI554389.v2.3U.G0161500/AeUmb.PI5…	38	0.904762
MF	GO:0016853	isomerase activity	39	0.458942	1.49278	0.00620248	0.0256905	0.0155969	1970	tags=59%, list=29%, signal=42%	AeUmb.PI554389.v2.3U.G0344500/AeUmb.PI554389.v2.6U.G0383600/AeUmb.PI554389.v2.7U.G0363800/AeUmb.PI554389.v2.5U.G0313500/AeUmb.PI554389.v2.2U.G0118600/AeUmb.PI554389.v2.7U.G0188800/AeUmb.PI554389.v2.1U.G0436800/AeUmb.PI554389.v2.7U.G0344100/AeUmb.PI554389.v2.2U.G0177100/AeUmb.PI554389.v2.5U.G0247900/AeUmb.PI554389.v2.2U.G0222600/AeUmb.PI554389.v2.5U.G0481300/AeUmb.PI554389.v2.5U.G0271400/AeUmb.PI5…	23	0.589744
BP	GO:0009166	nucleotide catabolic process	15	0.57454	1.61742	0.00626155	0.0257761	0.0156488	2451	tags=80%, list=36%, signal=51%	AeUmb.PI554389.v2.6U.G0374900/AeUmb.PI554389.v2.4U.G0248600/AeUmb.PI554389.v2.6U.G0263200/AeUmb.PI554389.v2.4U.G0925100/AeUmb.PI554389.v2.3U.G0416200/AeUmb.PI554389.v2.7U.G0303200/AeUmb.PI554389.v2.5U.G0153500/AeUmb.PI554389.v2.5U.G0393900/AeUmb.PI554389.v2.6U.G0596500/AeUmb.PI554389.v2.1U.G0580800/AeUmb.PI554389.v2.3U.G0601600/AeUmb.PI554389.v2.5U.G0186900	12	0.8
BP	GO:0090407	organophosphate biosynthetic process	42	0.448096	1.46798	0.00680204	0.0278303	0.016896	1341	tags=48%, list=20%, signal=38%	AeUmb.PI554389.v2.2U.G0182300/AeUmb.PI554389.v2.7U.G0841800/AeUmb.PI554389.v2.3U.G0276000/AeUmb.PI554389.v2.1U.G0319100/AeUmb.PI554389.v2.6U.G0611800/AeUmb.PI554389.v2.6U.G0563300/AeUmb.PI554389.v2.5U.G0913900/AeUmb.PI554389.v2.4U.G0869200/AeUmb.PI554389.v2.2U.G0252000/AeUmb.PI554389.v2.2U.G0515200/AeUmb.PI554389.v2.7U.G0114600/AeUmb.PI554389.v2.2U.G0501100/AeUmb.PI554389.v2.5U.G0607900/AeUmb.PI5…	20	0.47619
MF	GO:0015399	primary active transmembrane transporter activity	36	0.459901	1.48122	0.00720576	0.0293034	0.0177903	2612	tags=67%, list=38%, signal=41%	AeUmb.PI554389.v2.2U.G0131000/AeUmb.PI554389.v2.3U.G0170100/AeUmb.PI554389.v2.6U.G0460100/AeUmb.PI554389.v2.3U.G0279200/AeUmb.PI554389.v2.4U.G0929500/AeUmb.PI554389.v2.3U.G0195000/AeUmb.PI554389.v2.2U.G0463900/AeUmb.PI554389.v2.5U.G0229400/AeUmb.PI554389.v2.3U.G0245000/AeUmb.PI554389.v2.5U.G0868600/AeUmb.PI554389.v2.6U.G0408000/AeUmb.PI554389.v2.7U.G0572200/AeUmb.PI554389.v2.7U.G0279000/AeUmb.PI5…	24	0.666667
BP	GO:0006164	purine nucleotide biosynthetic process	18	0.541813	1.57899	0.00741644	0.0294463	0.0178771	1699	tags=61%, list=25%, signal=46%	AeUmb.PI554389.v2.2U.G0182300/AeUmb.PI554389.v2.7U.G0841800/AeUmb.PI554389.v2.6U.G0611800/AeUmb.PI554389.v2.4U.G0869200/AeUmb.PI554389.v2.7U.G0114600/AeUmb.PI554389.v2.5U.G0607900/AeUmb.PI554389.v2.2U.G0892100/AeUmb.PI554389.v2.7U.G0182200/AeUmb.PI554389.v2.7U.G0532800/AeUmb.PI554389.v2.6U.G0598500/AeUmb.PI554389.v2.5U.G0362500	11	0.611111
BP	GO:0071824	protein-DNA complex organization	28	0.489938	1.528	0.0073205	0.0294463	0.0178771	2075	tags=54%, list=30%, signal=37%	AeUmb.PI554389.v2.3U.G0495600/AeUmb.PI554389.v2.5U.G0180000/AeUmb.PI554389.v2.7U.G0873500/AeUmb.PI554389.v2.4U.G0160900/AeUmb.PI554389.v2.2U.G0821500/AeUmb.PI554389.v2.6U.G0306600/AeUmb.PI554389.v2.7U.G0934000/AeUmb.PI554389.v2.5U.G0360600/AeUmb.PI554389.v2.6U.G0191000/AeUmb.PI554389.v2.5U.G0915300/AeUmb.PI554389.v2.3U.G0246900/AeUmb.PI554389.v2.3U.G0183800/AeUmb.PI554389.v2.5U.G0166900/AeUmb.PI5…	15	0.535714
BP	GO:0016071	mRNA metabolic process	50	0.430248	1.43605	0.00740074	0.0294463	0.0178771	1805	tags=56%, list=26%, signal=41%	AeUmb.PI554389.v2.7U.G0367200/AeUmb.PI554389.v2.2U.G0785400/AeUmb.PI554389.v2.1U.G0437400/AeUmb.PI554389.v2.7U.G0066800/AeUmb.PI554389.v2.7U.G0698900/AeUmb.PI554389.v2.3U.G0122500/AeUmb.PI554389.v2.2U.G0310100/AeUmb.PI554389.v2.6U.G0412300/AeUmb.PI554389.v2.1U.G0269200/AeUmb.PI554389.v2.1U.G0566400/AeUmb.PI554389.v2.6U.G0527100/AeUmb.PI554389.v2.7U.G0177800/AeUmb.PI554389.v2.2U.G0240200/AeUmb.PI5…	28	0.56
MF	GO:0008324	monoatomic cation transmembrane transporter activity	62	0.412555	1.40486	0.0074	0.0294463	0.0178771	2350	tags=56%, list=34%, signal=37%	AeUmb.PI554389.v2.2U.G0131000/AeUmb.PI554389.v2.2U.G0182300/AeUmb.PI554389.v2.7U.G1028000/AeUmb.PI554389.v2.3U.G0170100/AeUmb.PI554389.v2.6U.G0460100/AeUmb.PI554389.v2.4U.G0815000/AeUmb.PI554389.v2.2U.G0609400/AeUmb.PI554389.v2.3U.G0449000/AeUmb.PI554389.v2.4U.G0929500/AeUmb.PI554389.v2.2U.G0158700/AeUmb.PI554389.v2.2U.G0475900/AeUmb.PI554389.v2.3U.G0195000/AeUmb.PI554389.v2.4U.G0869200/AeUmb.PI5…	35	0.564516
BP	GO:0009141	nucleoside triphosphate metabolic process	25	0.501926	1.53894	0.00814234	0.0321383	0.0195114	2698	tags=72%, list=40%, signal=44%	AeUmb.PI554389.v2.2U.G0182300/AeUmb.PI554389.v2.6U.G0374900/AeUmb.PI554389.v2.4U.G0248600/AeUmb.PI554389.v2.6U.G0263200/AeUmb.PI554389.v2.4U.G0925100/AeUmb.PI554389.v2.4U.G0869200/AeUmb.PI554389.v2.3U.G0416200/AeUmb.PI554389.v2.7U.G0303200/AeUmb.PI554389.v2.3U.G0245000/AeUmb.PI554389.v2.5U.G0153500/AeUmb.PI554389.v2.4U.G0030900/AeUmb.PI554389.v2.6U.G0598500/AeUmb.PI554389.v2.5U.G0393900/AeUmb.PI5…	18	0.72
BP	GO:0015980	energy derivation by oxidation of organic compounds	17	0.547047	1.57759	0.00825099	0.0323767	0.0196561	2696	tags=88%, list=40%, signal=53%	AeUmb.PI554389.v2.3U.G0547400/AeUmb.PI554389.v2.3U.G0063200/AeUmb.PI554389.v2.6U.G0309500/AeUmb.PI554389.v2.7U.G0589600/AeUmb.PI554389.v2.1U.G0423600/AeUmb.PI554389.v2.7U.G0306900/AeUmb.PI554389.v2.3U.G0306300/AeUmb.PI554389.v2.6U.G0293800/AeUmb.PI554389.v2.7U.G0143200/AeUmb.PI554389.v2.7U.G0677500/AeUmb.PI554389.v2.5U.G0237400/AeUmb.PI554389.v2.4U.G0932400/AeUmb.PI554389.v2.6U.G0451400/AeUmb.PI5…	15	0.882353
BP	GO:0019222	regulation of metabolic process	296	0.322215	1.20775	0.00889911	0.0347169	0.0210768	3633	tags=66%, list=53%, signal=32%	AeUmb.PI554389.v2.4U.G0897300/AeUmb.PI554389.v2.2U.G0051000/AeUmb.PI554389.v2.4U.G0807100/AeUmb.PI554389.v2.1U.G0207100/AeUmb.PI554389.v2.6U.G0601300/AeUmb.PI554389.v2.7U.G0932000/AeUmb.PI554389.v2.1U.G0437400/AeUmb.PI554389.v2.3U.G0290500/AeUmb.PI554389.v2.7U.G0066800/AeUmb.PI554389.v2.5U.G0647100/AeUmb.PI554389.v2.7U.G0698900/AeUmb.PI554389.v2.5U.G0201300/AeUmb.PI554389.v2.1U.G0140800/AeUmb.PI5…	196	0.662162
BP	GO:0006325	chromatin organization	24	0.503709	1.53482	0.00904977	0.0351006	0.0213098	2075	tags=54%, list=30%, signal=38%	AeUmb.PI554389.v2.3U.G0495600/AeUmb.PI554389.v2.5U.G0180000/AeUmb.PI554389.v2.4U.G0160900/AeUmb.PI554389.v2.2U.G0821500/AeUmb.PI554389.v2.6U.G0306600/AeUmb.PI554389.v2.7U.G0934000/AeUmb.PI554389.v2.5U.G0360600/AeUmb.PI554389.v2.5U.G0915300/AeUmb.PI554389.v2.3U.G0246900/AeUmb.PI554389.v2.3U.G0183800/AeUmb.PI554389.v2.5U.G0166900/AeUmb.PI554389.v2.4U.G0838900/AeUmb.PI554389.v2.4U.G0940400	13	0.541667
BP	GO:0009060	aerobic respiration	14	0.57489	1.59568	0.00960149	0.0368458	0.0223693	2696	tags=93%, list=40%, signal=56%	AeUmb.PI554389.v2.3U.G0547400/AeUmb.PI554389.v2.3U.G0063200/AeUmb.PI554389.v2.7U.G0589600/AeUmb.PI554389.v2.1U.G0423600/AeUmb.PI554389.v2.7U.G0306900/AeUmb.PI554389.v2.6U.G0293800/AeUmb.PI554389.v2.7U.G0143200/AeUmb.PI554389.v2.7U.G0677500/AeUmb.PI554389.v2.5U.G0237400/AeUmb.PI554389.v2.4U.G0932400/AeUmb.PI554389.v2.6U.G0451400/AeUmb.PI554389.v2.2U.G0755300/AeUmb.PI554389.v2.1U.G0585700	13	0.928571
BP	GO:0006338	chromatin remodeling	20	0.529127	1.56749	0.00960955	0.0368458	0.0223693	2075	tags=55%, list=30%, signal=38%	AeUmb.PI554389.v2.5U.G0180000/AeUmb.PI554389.v2.4U.G0160900/AeUmb.PI554389.v2.6U.G0306600/AeUmb.PI554389.v2.7U.G0934000/AeUmb.PI554389.v2.5U.G0360600/AeUmb.PI554389.v2.5U.G0915300/AeUmb.PI554389.v2.3U.G0246900/AeUmb.PI554389.v2.3U.G0183800/AeUmb.PI554389.v2.5U.G0166900/AeUmb.PI554389.v2.4U.G0838900/AeUmb.PI554389.v2.4U.G0940400	11	0.55
MF	GO:0008237	metallopeptidase activity	27	0.4886	1.51595	0.0100331	0.0382512	0.0232226	2318	tags=63%, list=34%, signal=42%	AeUmb.PI554389.v2.7U.G0122600/AeUmb.PI554389.v2.2U.G0448600/AeUmb.PI554389.v2.7U.G0293800/AeUmb.PI554389.v2.6U.G0626600/AeUmb.PI554389.v2.4U.G0644000/AeUmb.PI554389.v2.3U.G0125900/AeUmb.PI554389.v2.3U.G0158900/AeUmb.PI554389.v2.7U.G0233400/AeUmb.PI554389.v2.3U.G0260300/AeUmb.PI554389.v2.6U.G0589100/AeUmb.PI554389.v2.6U.G0422100/AeUmb.PI554389.v2.3U.G0265700/AeUmb.PI554389.v2.4U.G0153600/AeUmb.PI5…	17	0.62963
BP	GO:0034655	nucleobase-containing compound catabolic process	27	0.487411	1.51226	0.0102338	0.0387958	0.0235532	1105	tags=48%, list=16%, signal=41%	AeUmb.PI554389.v2.1U.G0437400/AeUmb.PI554389.v2.7U.G0698900/AeUmb.PI554389.v2.6U.G0374900/AeUmb.PI554389.v2.4U.G0908700/AeUmb.PI554389.v2.4U.G0248600/AeUmb.PI554389.v2.6U.G0263200/AeUmb.PI554389.v2.2U.G0310100/AeUmb.PI554389.v2.4U.G0925100/AeUmb.PI554389.v2.1U.G0376700/AeUmb.PI554389.v2.3U.G0416200/AeUmb.PI554389.v2.2U.G0442200/AeUmb.PI554389.v2.7U.G0303200/AeUmb.PI554389.v2.5U.G0153500	13	0.481481
CC	GO:0009521	photosystem	24	0.498669	1.51946	0.0104575	0.0394213	0.0239329	2549	tags=71%, list=37%, signal=45%	AeUmb.PI554389.v2.2U.G0191900/AeUmb.PI554389.v2.2U.G0191100/AeUmb.PI554389.v2.2U.G0341200/AeUmb.PI554389.v2.5U.G0437900/AeUmb.PI554389.v2.2U.G0683900/AeUmb.PI554389.v2.2U.G0139500/AeUmb.PI554389.v2.7U.G0081500/AeUmb.PI554389.v2.7U.G0966200/AeUmb.PI554389.v2.7U.G0194500/AeUmb.PI554389.v2.4U.G0100200/AeUmb.PI554389.v2.2U.G0690700/AeUmb.PI554389.v2.6U.G0277200/AeUmb.PI554389.v2.3U.G0308200/AeUmb.PI5…	17	0.708333
MF	GO:0003779	actin binding	12	0.594246	1.5985	0.0109787	0.0411547	0.0249853	1979	tags=67%, list=29%, signal=47%	AeUmb.PI554389.v2.7U.G0646600/AeUmb.PI554389.v2.2U.G0672500/AeUmb.PI554389.v2.6U.G0241200/AeUmb.PI554389.v2.7U.G0890800/AeUmb.PI554389.v2.5U.G0707800/AeUmb.PI554389.v2.5U.G0813900/AeUmb.PI554389.v2.2U.G0821600/AeUmb.PI554389.v2.1U.G0092700	8	0.666667
BP	GO:0046434	organophosphate catabolic process	16	0.548084	1.56296	0.0114461	0.0417066	0.0253204	2451	tags=75%, list=36%, signal=48%	AeUmb.PI554389.v2.6U.G0374900/AeUmb.PI554389.v2.4U.G0248600/AeUmb.PI554389.v2.6U.G0263200/AeUmb.PI554389.v2.4U.G0925100/AeUmb.PI554389.v2.3U.G0416200/AeUmb.PI554389.v2.7U.G0303200/AeUmb.PI554389.v2.5U.G0153500/AeUmb.PI554389.v2.5U.G0393900/AeUmb.PI554389.v2.6U.G0596500/AeUmb.PI554389.v2.1U.G0580800/AeUmb.PI554389.v2.3U.G0601600/AeUmb.PI554389.v2.5U.G0186900	12	0.75
BP	GO:1901292	nucleoside phosphate catabolic process	16	0.548084	1.56296	0.0114461	0.0417066	0.0253204	2451	tags=75%, list=36%, signal=48%	AeUmb.PI554389.v2.6U.G0374900/AeUmb.PI554389.v2.4U.G0248600/AeUmb.PI554389.v2.6U.G0263200/AeUmb.PI554389.v2.4U.G0925100/AeUmb.PI554389.v2.3U.G0416200/AeUmb.PI554389.v2.7U.G0303200/AeUmb.PI554389.v2.5U.G0153500/AeUmb.PI554389.v2.5U.G0393900/AeUmb.PI554389.v2.6U.G0596500/AeUmb.PI554389.v2.1U.G0580800/AeUmb.PI554389.v2.3U.G0601600/AeUmb.PI554389.v2.5U.G0186900	12	0.75
BP	GO:0009889	regulation of biosynthetic process	270	0.323148	1.20684	0.0114989	0.0417066	0.0253204	3633	tags=66%, list=53%, signal=32%	AeUmb.PI554389.v2.4U.G0897300/AeUmb.PI554389.v2.2U.G0051000/AeUmb.PI554389.v2.4U.G0807100/AeUmb.PI554389.v2.6U.G0601300/AeUmb.PI554389.v2.7U.G0932000/AeUmb.PI554389.v2.1U.G0437400/AeUmb.PI554389.v2.3U.G0290500/AeUmb.PI554389.v2.7U.G0066800/AeUmb.PI554389.v2.5U.G0647100/AeUmb.PI554389.v2.7U.G0698900/AeUmb.PI554389.v2.5U.G0201300/AeUmb.PI554389.v2.1U.G0140800/AeUmb.PI554389.v2.6U.G0446200/AeUmb.PI5…	178	0.659259
BP	GO:0010468	regulation of gene expression	270	0.323148	1.20684	0.0114989	0.0417066	0.0253204	3633	tags=66%, list=53%, signal=32%	AeUmb.PI554389.v2.4U.G0897300/AeUmb.PI554389.v2.2U.G0051000/AeUmb.PI554389.v2.4U.G0807100/AeUmb.PI554389.v2.6U.G0601300/AeUmb.PI554389.v2.7U.G0932000/AeUmb.PI554389.v2.1U.G0437400/AeUmb.PI554389.v2.3U.G0290500/AeUmb.PI554389.v2.7U.G0066800/AeUmb.PI554389.v2.5U.G0647100/AeUmb.PI554389.v2.7U.G0698900/AeUmb.PI554389.v2.5U.G0201300/AeUmb.PI554389.v2.1U.G0140800/AeUmb.PI554389.v2.6U.G0446200/AeUmb.PI5…	178	0.659259
BP	GO:0010556	regulation of macromolecule biosynthetic process	270	0.323148	1.20684	0.0114989	0.0417066	0.0253204	3633	tags=66%, list=53%, signal=32%	AeUmb.PI554389.v2.4U.G0897300/AeUmb.PI554389.v2.2U.G0051000/AeUmb.PI554389.v2.4U.G0807100/AeUmb.PI554389.v2.6U.G0601300/AeUmb.PI554389.v2.7U.G0932000/AeUmb.PI554389.v2.1U.G0437400/AeUmb.PI554389.v2.3U.G0290500/AeUmb.PI554389.v2.7U.G0066800/AeUmb.PI554389.v2.5U.G0647100/AeUmb.PI554389.v2.7U.G0698900/AeUmb.PI554389.v2.5U.G0201300/AeUmb.PI554389.v2.1U.G0140800/AeUmb.PI554389.v2.6U.G0446200/AeUmb.PI5…	178	0.659259
BP	GO:0031326	regulation of cellular biosynthetic process	270	0.323148	1.20684	0.0114989	0.0417066	0.0253204	3633	tags=66%, list=53%, signal=32%	AeUmb.PI554389.v2.4U.G0897300/AeUmb.PI554389.v2.2U.G0051000/AeUmb.PI554389.v2.4U.G0807100/AeUmb.PI554389.v2.6U.G0601300/AeUmb.PI554389.v2.7U.G0932000/AeUmb.PI554389.v2.1U.G0437400/AeUmb.PI554389.v2.3U.G0290500/AeUmb.PI554389.v2.7U.G0066800/AeUmb.PI554389.v2.5U.G0647100/AeUmb.PI554389.v2.7U.G0698900/AeUmb.PI554389.v2.5U.G0201300/AeUmb.PI554389.v2.1U.G0140800/AeUmb.PI554389.v2.6U.G0446200/AeUmb.PI5…	178	0.659259
BP	GO:0000413	protein peptidyl-prolyl isomerization	10	0.620431	1.59991	0.0118186	0.0424078	0.0257461	1810	tags=80%, list=27%, signal=59%	AeUmb.PI554389.v2.6U.G0383600/AeUmb.PI554389.v2.7U.G0363800/AeUmb.PI554389.v2.2U.G0118600/AeUmb.PI554389.v2.7U.G0344100/AeUmb.PI554389.v2.2U.G0177100/AeUmb.PI554389.v2.5U.G0925400/AeUmb.PI554389.v2.7U.G1062100/AeUmb.PI554389.v2.3U.G0179800	8	0.8
BP	GO:0018208	peptidyl-proline modification	10	0.620431	1.59991	0.0118186	0.0424078	0.0257461	1810	tags=80%, list=27%, signal=59%	AeUmb.PI554389.v2.6U.G0383600/AeUmb.PI554389.v2.7U.G0363800/AeUmb.PI554389.v2.2U.G0118600/AeUmb.PI554389.v2.7U.G0344100/AeUmb.PI554389.v2.2U.G0177100/AeUmb.PI554389.v2.5U.G0925400/AeUmb.PI554389.v2.7U.G1062100/AeUmb.PI554389.v2.3U.G0179800	8	0.8
BP	GO:0019219	regulation of nucleobase-containing compound metabolic process	258	0.324416	1.20918	0.0119988	0.0428255	0.0259996	3633	tags=67%, list=53%, signal=32%	AeUmb.PI554389.v2.4U.G0897300/AeUmb.PI554389.v2.2U.G0051000/AeUmb.PI554389.v2.4U.G0807100/AeUmb.PI554389.v2.6U.G0601300/AeUmb.PI554389.v2.7U.G0932000/AeUmb.PI554389.v2.3U.G0290500/AeUmb.PI554389.v2.7U.G0066800/AeUmb.PI554389.v2.5U.G0647100/AeUmb.PI554389.v2.5U.G0201300/AeUmb.PI554389.v2.1U.G0140800/AeUmb.PI554389.v2.6U.G0446200/AeUmb.PI554389.v2.2U.G0310100/AeUmb.PI554389.v2.1U.G0225000/AeUmb.PI5…	172	0.666667
CC	GO:0140513	nuclear protein-containing complex	61	0.404238	1.37467	0.0122	0.0433132	0.0262957	3564	tags=87%, list=52%, signal=42%	AeUmb.PI554389.v2.5U.G0647100/AeUmb.PI554389.v2.5U.G0344700/AeUmb.PI554389.v2.7U.G0074000/AeUmb.PI554389.v2.5U.G0180000/AeUmb.PI554389.v2.1U.G0557300/AeUmb.PI554389.v2.6U.G0412300/AeUmb.PI554389.v2.2U.G0181500/AeUmb.PI554389.v2.4U.G0236100/AeUmb.PI554389.v2.6U.G0306600/AeUmb.PI554389.v2.1U.G0228600/AeUmb.PI554389.v2.7U.G1021600/AeUmb.PI554389.v2.2U.G0267300/AeUmb.PI554389.v2.6U.G0204600/AeUmb.PI5…	53	0.868852
BP	GO:1901137	carbohydrate derivative biosynthetic process	40	0.438473	1.4296	0.0127013	0.0448555	0.0272321	2698	tags=65%, list=40%, signal=40%	AeUmb.PI554389.v2.2U.G0182300/AeUmb.PI554389.v2.2U.G0314200/AeUmb.PI554389.v2.7U.G0841800/AeUmb.PI554389.v2.6U.G0611800/AeUmb.PI554389.v2.3U.G0338000/AeUmb.PI554389.v2.4U.G0869200/AeUmb.PI554389.v2.7U.G0114600/AeUmb.PI554389.v2.2U.G0501100/AeUmb.PI554389.v2.7U.G0653400/AeUmb.PI554389.v2.2U.G0892100/AeUmb.PI554389.v2.7U.G0182200/AeUmb.PI554389.v2.7U.G0532800/AeUmb.PI554389.v2.6U.G0448900/AeUmb.PI5…	26	0.65
MF	GO:0022836	gated channel activity	19	0.520873	1.53029	0.0128751	0.0452314	0.0274603	2331	tags=68%, list=34%, signal=45%	AeUmb.PI554389.v2.3U.G0182800/AeUmb.PI554389.v2.2U.G0609400/AeUmb.PI554389.v2.4U.G0710500/AeUmb.PI554389.v2.3U.G0249500/AeUmb.PI554389.v2.5U.G0335400/AeUmb.PI554389.v2.2U.G0495500/AeUmb.PI554389.v2.1U.G0460500/AeUmb.PI554389.v2.7U.G0011300/AeUmb.PI554389.v2.5U.G0898300/AeUmb.PI554389.v2.2U.G0195700/AeUmb.PI554389.v2.5U.G0855500/AeUmb.PI554389.v2.6U.G0569900/AeUmb.PI554389.v2.1U.G0067500	13	0.684211
CC	GO:0009579	thylakoid	31	0.463162	1.46536	0.0139251	0.0486652	0.029545	2659	tags=68%, list=39%, signal=42%	AeUmb.PI554389.v2.2U.G0191900/AeUmb.PI554389.v2.2U.G0191100/AeUmb.PI554389.v2.2U.G0341200/AeUmb.PI554389.v2.5U.G0216700/AeUmb.PI554389.v2.5U.G0437900/AeUmb.PI554389.v2.2U.G0683900/AeUmb.PI554389.v2.2U.G0139500/AeUmb.PI554389.v2.7U.G0081500/AeUmb.PI554389.v2.7U.G0966200/AeUmb.PI554389.v2.7U.G0194500/AeUmb.PI554389.v2.5U.G0686800/AeUmb.PI554389.v2.4U.G0100200/AeUmb.PI554389.v2.2U.G0690700/AeUmb.PI5…	21	0.677419
BP	GO:0006811	monoatomic ion transport	73	0.387468	1.33756	0.0140986	0.0490163	0.0297581	2350	tags=55%, list=34%, signal=36%	AeUmb.PI554389.v2.2U.G0131000/AeUmb.PI554389.v2.7U.G1028000/AeUmb.PI554389.v2.3U.G0170100/AeUmb.PI554389.v2.3U.G0182800/AeUmb.PI554389.v2.4U.G0815000/AeUmb.PI554389.v2.5U.G0618600/AeUmb.PI554389.v2.2U.G0609400/AeUmb.PI554389.v2.3U.G0449000/AeUmb.PI554389.v2.4U.G0929500/AeUmb.PI554389.v2.2U.G0158700/AeUmb.PI554389.v2.2U.G0475900/AeUmb.PI554389.v2.4U.G0710500/AeUmb.PI554389.v2.3U.G0195000/AeUmb.PI5…	40	0.547945
BP	GO:0051252	regulation of RNA metabolic process	255	0.322019	1.19979	0.0141986	0.0491095	0.0298147	3633	tags=66%, list=53%, signal=32%	AeUmb.PI554389.v2.4U.G0897300/AeUmb.PI554389.v2.2U.G0051000/AeUmb.PI554389.v2.4U.G0807100/AeUmb.PI554389.v2.6U.G0601300/AeUmb.PI554389.v2.7U.G0932000/AeUmb.PI554389.v2.3U.G0290500/AeUmb.PI554389.v2.7U.G0066800/AeUmb.PI554389.v2.5U.G0647100/AeUmb.PI554389.v2.5U.G0201300/AeUmb.PI554389.v2.1U.G0140800/AeUmb.PI554389.v2.6U.G0446200/AeUmb.PI554389.v2.2U.G0310100/AeUmb.PI554389.v2.1U.G0225000/AeUmb.PI5…	169	0.662745

## Sheet: U89I72_vs_U17I72_Up
ONTOLOGY	ID	Description	setSize	enrichmentScore	NES	pvalue	p.adjust	qvalue	rank	leading_edge	core_enrichment	CoreGeneCount	GeneRatio
BP	GO:0034470	ncRNA processing	20	-0.570093	-2.59376	3.15357e-06	0.00110902	0.00101355	3609	tags=100%, list=43%, signal=57%	AeUmb.PI554389.v2.4U.G1030000/AeUmb.PI554389.v2.6U.G0099600/AeUmb.PI554389.v2.5U.G0925200/AeUmb.PI554389.v2.3U.G0461200/AeUmb.PI554389.v2.2U.G0202900/AeUmb.PI554389.v2.4U.G0656300/AeUmb.PI554389.v2.4U.G0079600/AeUmb.PI554389.v2.3U.G0336900/AeUmb.PI554389.v2.7U.G0702600/AeUmb.PI554389.v2.3U.G0062000/AeUmb.PI554389.v2.3U.G0736300/AeUmb.PI554389.v2.5U.G0710200/AeUmb.PI554389.v2.7U.G0061100/AeUmb.PI5…	19	0.95
MF	GO:0016616	oxidoreductase activity, acting on the CH-OH group of donors, NAD or NADP as acceptor	27	-0.498861	-2.44118	3.43882e-06	0.00110902	0.00101355	4207	tags=100%, list=50%, signal=50%	AeUmb.PI554389.v2.2U.G0831800/AeUmb.PI554389.v2.5U.G0456000/AeUmb.PI554389.v2.1U.G0532400/AeUmb.PI554389.v2.2U.G0846000/AeUmb.PI554389.v2.4U.G0209800/AeUmb.PI554389.v2.6U.G0039300/AeUmb.PI554389.v2.5U.G0676100/AeUmb.PI554389.v2.3U.G0276500/AeUmb.PI554389.v2.2U.G0832300/AeUmb.PI554389.v2.2U.G0304100/AeUmb.PI554389.v2.1U.G0396400/AeUmb.PI554389.v2.4U.G0487000/AeUmb.PI554389.v2.5U.G0371700/AeUmb.PI5…	26	0.962963
MF	GO:0043531	ADP binding	195	0.395372	1.45703	1.35466e-05	0.00291251	0.00266178	4085	tags=75%, list=49%, signal=39%	AeUmb.PI554389.v2.2U.G0863500/AeUmb.PI554389.v2.7U.G0825700/AeUmb.PI554389.v2.2U.G0863400/AeUmb.PI554389.v2.3U.G0546300/AeUmb.PI554389.v2.7U.G1052900/AeUmb.PI554389.v2.7U.G0759400/AeUmb.PI554389.v2.7U.G1053300/AeUmb.PI554389.v2.4U.G0215400/AeUmb.PI554389.v2.4U.G0033900/AeUmb.PI554389.v2.7U.G0833600/AeUmb.PI554389.v2.4U.G0018300/AeUmb.PI554389.v2.4U.G0424500/AeUmb.PI554389.v2.4U.G0032600/AeUmb.PI5…	147	0.753846
BP	GO:0006952	defense response	224	0.372923	1.38267	6.59921e-05	0.0106412	0.00972516	3844	tags=68%, list=46%, signal=38%	AeUmb.PI554389.v2.2U.G0863400/AeUmb.PI554389.v2.3U.G0546300/AeUmb.PI554389.v2.1U.G0377800/AeUmb.PI554389.v2.7U.G0759400/AeUmb.PI554389.v2.7U.G1053300/AeUmb.PI554389.v2.4U.G0215400/AeUmb.PI554389.v2.4U.G0033900/AeUmb.PI554389.v2.7U.G0833600/AeUmb.PI554389.v2.4U.G0424500/AeUmb.PI554389.v2.3U.G0546400/AeUmb.PI554389.v2.5U.G0066400/AeUmb.PI554389.v2.2U.G0014300/AeUmb.PI554389.v2.7U.G0782300/AeUmb.PI5…	153	0.683036
MF	GO:0004532	RNA exonuclease activity	10	0.75717	1.94397	0.000274426	0.0270829	0.0247514	344	tags=50%, list=4%, signal=48%	AeUmb.PI554389.v2.3U.G0095600/AeUmb.PI554389.v2.3U.G0094700/AeUmb.PI554389.v2.3U.G0086100/AeUmb.PI554389.v2.3U.G0092300/AeUmb.PI554389.v2.3U.G0095000	5	0.5
MF	GO:0016896	RNA exonuclease activity, producing 5'-phosphomonoesters	10	0.75717	1.94397	0.000274426	0.0270829	0.0247514	344	tags=50%, list=4%, signal=48%	AeUmb.PI554389.v2.3U.G0095600/AeUmb.PI554389.v2.3U.G0094700/AeUmb.PI554389.v2.3U.G0086100/AeUmb.PI554389.v2.3U.G0092300/AeUmb.PI554389.v2.3U.G0095000	5	0.5
BP	GO:0006950	response to stress	338	0.340943	1.28544	0.000293923	0.0270829	0.0247514	4092	tags=65%, list=49%, signal=35%	AeUmb.PI554389.v2.2U.G0863400/AeUmb.PI554389.v2.3U.G0546300/AeUmb.PI554389.v2.1U.G0377800/AeUmb.PI554389.v2.7U.G0759400/AeUmb.PI554389.v2.7U.G1053300/AeUmb.PI554389.v2.4U.G0215400/AeUmb.PI554389.v2.4U.G0033900/AeUmb.PI554389.v2.7U.G0833600/AeUmb.PI554389.v2.4U.G0424500/AeUmb.PI554389.v2.3U.G0546400/AeUmb.PI554389.v2.5U.G0066400/AeUmb.PI554389.v2.3U.G0177200/AeUmb.PI554389.v2.2U.G0014300/AeUmb.PI5…	220	0.650888
MF	GO:0016667	oxidoreductase activity, acting on a sulfur group of donors	12	-0.597678	-2.19383	0.000360661	0.0290783	0.026575	3374	tags=100%, list=40%, signal=60%	AeUmb.PI554389.v2.7U.G0053000/AeUmb.PI554389.v2.1U.G0548800/AeUmb.PI554389.v2.4U.G0204600/AeUmb.PI554389.v2.4U.G0879900/AeUmb.PI554389.v2.2U.G0364700/AeUmb.PI554389.v2.1U.G0220300/AeUmb.PI554389.v2.6U.G0168900/AeUmb.PI554389.v2.6U.G0726500/AeUmb.PI554389.v2.1U.G0154600/AeUmb.PI554389.v2.7U.G0245000/AeUmb.PI554389.v2.2U.G0654700	11	0.916667
CC	GO:0005794	Golgi apparatus	10	-0.626975	-2.13016	0.0006121	0.0326881	0.0298741	3128	tags=100%, list=37%, signal=63%	AeUmb.PI554389.v2.3U.G0362700/AeUmb.PI554389.v2.2U.G0108400/AeUmb.PI554389.v2.6U.G0016800/AeUmb.PI554389.v2.2U.G0769700/AeUmb.PI554389.v2.7U.G0456500/AeUmb.PI554389.v2.4U.G0838800/AeUmb.PI554389.v2.3U.G0139600/AeUmb.PI554389.v2.1U.G0302600/AeUmb.PI554389.v2.1U.G0483500	9	0.9
MF	GO:0008135	translation factor activity, RNA binding	17	-0.511079	-2.08993	0.000658831	0.0326881	0.0298741	4100	tags=100%, list=49%, signal=51%	AeUmb.PI554389.v2.5U.G0187200/AeUmb.PI554389.v2.4U.G0944600/AeUmb.PI554389.v2.6U.G0688400/AeUmb.PI554389.v2.4U.G1022700/AeUmb.PI554389.v2.4U.G0983300/AeUmb.PI554389.v2.2U.G0826700/AeUmb.PI554389.v2.2U.G0342100/AeUmb.PI554389.v2.2U.G0386100/AeUmb.PI554389.v2.7U.G0155200/AeUmb.PI554389.v2.2U.G0086300/AeUmb.PI554389.v2.1U.G0563900/AeUmb.PI554389.v2.6U.G0451300/AeUmb.PI554389.v2.6U.G0105100/AeUmb.PI5…	16	0.941176
MF	GO:0045182	translation regulator activity	17	-0.511079	-2.08993	0.000658831	0.0326881	0.0298741	4100	tags=100%, list=49%, signal=51%	AeUmb.PI554389.v2.5U.G0187200/AeUmb.PI554389.v2.4U.G0944600/AeUmb.PI554389.v2.6U.G0688400/AeUmb.PI554389.v2.4U.G1022700/AeUmb.PI554389.v2.4U.G0983300/AeUmb.PI554389.v2.2U.G0826700/AeUmb.PI554389.v2.2U.G0342100/AeUmb.PI554389.v2.2U.G0386100/AeUmb.PI554389.v2.7U.G0155200/AeUmb.PI554389.v2.2U.G0086300/AeUmb.PI554389.v2.1U.G0563900/AeUmb.PI554389.v2.6U.G0451300/AeUmb.PI554389.v2.6U.G0105100/AeUmb.PI5…	16	0.941176
MF	GO:0090079	translation regulator activity, nucleic acid binding	17	-0.511079	-2.08993	0.000658831	0.0326881	0.0298741	4100	tags=100%, list=49%, signal=51%	AeUmb.PI554389.v2.5U.G0187200/AeUmb.PI554389.v2.4U.G0944600/AeUmb.PI554389.v2.6U.G0688400/AeUmb.PI554389.v2.4U.G1022700/AeUmb.PI554389.v2.4U.G0983300/AeUmb.PI554389.v2.2U.G0826700/AeUmb.PI554389.v2.2U.G0342100/AeUmb.PI554389.v2.2U.G0386100/AeUmb.PI554389.v2.7U.G0155200/AeUmb.PI554389.v2.2U.G0086300/AeUmb.PI554389.v2.1U.G0563900/AeUmb.PI554389.v2.6U.G0451300/AeUmb.PI554389.v2.6U.G0105100/AeUmb.PI5…	16	0.941176
BP	GO:0006470	protein dephosphorylation	18	-0.482254	-2.05096	0.000537464	0.0326881	0.0298741	2892	tags=94%, list=35%, signal=62%	AeUmb.PI554389.v2.2U.G0022400/AeUmb.PI554389.v2.1U.G0456800/AeUmb.PI554389.v2.5U.G0273000/AeUmb.PI554389.v2.2U.G0496800/AeUmb.PI554389.v2.2U.G0740400/AeUmb.PI554389.v2.5U.G0153300/AeUmb.PI554389.v2.1U.G0368700/AeUmb.PI554389.v2.6U.G0420600/AeUmb.PI554389.v2.3U.G0242300/AeUmb.PI554389.v2.7U.G0073700/AeUmb.PI554389.v2.4U.G0025400/AeUmb.PI554389.v2.3U.G0387200/AeUmb.PI554389.v2.1U.G0111700/AeUmb.PI5…	17	0.944444
MF	GO:0016796	exonuclease activity, active with either ribo- or deoxyribonucleic acids and producing 5'-phosphomonoesters	11	0.726188	1.90686	0.000950423	0.0437874	0.0400178	344	tags=45%, list=4%, signal=44%	AeUmb.PI554389.v2.3U.G0095600/AeUmb.PI554389.v2.3U.G0094700/AeUmb.PI554389.v2.3U.G0086100/AeUmb.PI554389.v2.3U.G0092300/AeUmb.PI554389.v2.3U.G0095000	5	0.454545

## Sheet: U89I72_vs_U17I72_Down
ONTOLOGY	ID	Description	setSize	enrichmentScore	NES	pvalue	p.adjust	qvalue	rank	leading_edge	core_enrichment	CoreGeneCount	GeneRatio
CC	GO:0043227	membrane-bounded organelle	267	0.436378	1.62995	1e-10	1.68e-08	8.86842e-09	2993	tags=78%, list=46%, signal=44%	AeUmb.PI554389.v2.7U.G0840300/AeUmb.PI554389.v2.4U.G0145000/AeUmb.PI554389.v2.6U.G0151000/AeUmb.PI554389.v2.2U.G0122700/AeUmb.PI554389.v2.7U.G0123400/AeUmb.PI554389.v2.5U.G0353800/AeUmb.PI554389.v2.7U.G0173800/AeUmb.PI554389.v2.4U.G0163900/AeUmb.PI554389.v2.5U.G0414700/AeUmb.PI554389.v2.4U.G0131200/AeUmb.PI554389.v2.5U.G0180000/AeUmb.PI554389.v2.5U.G0335400/AeUmb.PI554389.v2.2U.G0196900/AeUmb.PI5…	207	0.775281
CC	GO:0043231	intracellular membrane-bounded organelle	267	0.436378	1.62995	1e-10	1.68e-08	8.86842e-09	2993	tags=78%, list=46%, signal=44%	AeUmb.PI554389.v2.7U.G0840300/AeUmb.PI554389.v2.4U.G0145000/AeUmb.PI554389.v2.6U.G0151000/AeUmb.PI554389.v2.2U.G0122700/AeUmb.PI554389.v2.7U.G0123400/AeUmb.PI554389.v2.5U.G0353800/AeUmb.PI554389.v2.7U.G0173800/AeUmb.PI554389.v2.4U.G0163900/AeUmb.PI554389.v2.5U.G0414700/AeUmb.PI554389.v2.4U.G0131200/AeUmb.PI554389.v2.5U.G0180000/AeUmb.PI554389.v2.5U.G0335400/AeUmb.PI554389.v2.2U.G0196900/AeUmb.PI5…	207	0.775281
CC	GO:0043226	organelle	432	0.403392	1.53089	1e-10	1.68e-08	8.86842e-09	3222	tags=75%, list=49%, signal=41%	AeUmb.PI554389.v2.7U.G0840300/AeUmb.PI554389.v2.4U.G0145000/AeUmb.PI554389.v2.6U.G0151000/AeUmb.PI554389.v2.2U.G0122700/AeUmb.PI554389.v2.7U.G0123400/AeUmb.PI554389.v2.5U.G0353800/AeUmb.PI554389.v2.7U.G0173800/AeUmb.PI554389.v2.4U.G0163900/AeUmb.PI554389.v2.5U.G0414700/AeUmb.PI554389.v2.4U.G0131200/AeUmb.PI554389.v2.5U.G0180000/AeUmb.PI554389.v2.3U.G0204600/AeUmb.PI554389.v2.5U.G0335400/AeUmb.PI5…	323	0.747685
CC	GO:0043229	intracellular organelle	432	0.403392	1.53089	1e-10	1.68e-08	8.86842e-09	3222	tags=75%, list=49%, signal=41%	AeUmb.PI554389.v2.7U.G0840300/AeUmb.PI554389.v2.4U.G0145000/AeUmb.PI554389.v2.6U.G0151000/AeUmb.PI554389.v2.2U.G0122700/AeUmb.PI554389.v2.7U.G0123400/AeUmb.PI554389.v2.5U.G0353800/AeUmb.PI554389.v2.7U.G0173800/AeUmb.PI554389.v2.4U.G0163900/AeUmb.PI554389.v2.5U.G0414700/AeUmb.PI554389.v2.4U.G0131200/AeUmb.PI554389.v2.5U.G0180000/AeUmb.PI554389.v2.3U.G0204600/AeUmb.PI554389.v2.5U.G0335400/AeUmb.PI5…	323	0.747685
CC	GO:0005737	cytoplasm	187	0.453788	1.66946	1.45973e-10	1.96188e-08	1.03564e-08	2671	tags=72%, list=41%, signal=44%	AeUmb.PI554389.v2.2U.G0058700/AeUmb.PI554389.v2.7U.G0840300/AeUmb.PI554389.v2.4U.G0145000/AeUmb.PI554389.v2.5U.G0512000/AeUmb.PI554389.v2.2U.G0031400/AeUmb.PI554389.v2.2U.G0122700/AeUmb.PI554389.v2.5U.G0353800/AeUmb.PI554389.v2.7U.G0173800/AeUmb.PI554389.v2.4U.G0163900/AeUmb.PI554389.v2.5U.G0414700/AeUmb.PI554389.v2.5U.G0335400/AeUmb.PI554389.v2.2U.G0196900/AeUmb.PI554389.v2.5U.G0791500/AeUmb.PI5…	134	0.716578
BP	GO:0010073	meristem maintenance	12	-0.79683	-2.96069	2.04334e-08	1.71641e-06	9.0606e-07	1346	tags=100%, list=20%, signal=80%	AeUmb.PI554389.v2.4U.G0072000/AeUmb.PI554389.v2.6U.G0115400/AeUmb.PI554389.v2.1U.G0514800/AeUmb.PI554389.v2.1U.G0244800/AeUmb.PI554389.v2.6U.G0550600/AeUmb.PI554389.v2.2U.G0018900/AeUmb.PI554389.v2.3U.G0289600/AeUmb.PI554389.v2.5U.G0151200/AeUmb.PI554389.v2.6U.G0081100/AeUmb.PI554389.v2.3U.G0099600/AeUmb.PI554389.v2.6U.G0496700	11	0.916667
BP	GO:0048507	meristem development	12	-0.79683	-2.96069	2.04334e-08	1.71641e-06	9.0606e-07	1346	tags=100%, list=20%, signal=80%	AeUmb.PI554389.v2.4U.G0072000/AeUmb.PI554389.v2.6U.G0115400/AeUmb.PI554389.v2.1U.G0514800/AeUmb.PI554389.v2.1U.G0244800/AeUmb.PI554389.v2.6U.G0550600/AeUmb.PI554389.v2.2U.G0018900/AeUmb.PI554389.v2.3U.G0289600/AeUmb.PI554389.v2.5U.G0151200/AeUmb.PI554389.v2.6U.G0081100/AeUmb.PI554389.v2.3U.G0099600/AeUmb.PI554389.v2.6U.G0496700	11	0.916667
BP	GO:0051641	cellular localization	84	0.527041	1.84237	1.67442e-08	1.71641e-06	9.0606e-07	2462	tags=80%, list=37%, signal=51%	AeUmb.PI554389.v2.2U.G0058700/AeUmb.PI554389.v2.3U.G0016100/AeUmb.PI554389.v2.6U.G0436400/AeUmb.PI554389.v2.4U.G0060400/AeUmb.PI554389.v2.5U.G0414700/AeUmb.PI554389.v2.2U.G0196900/AeUmb.PI554389.v2.3U.G0661200/AeUmb.PI554389.v2.6U.G0288300/AeUmb.PI554389.v2.4U.G0973500/AeUmb.PI554389.v2.6U.G0537000/AeUmb.PI554389.v2.7U.G0049700/AeUmb.PI554389.v2.6U.G0443700/AeUmb.PI554389.v2.4U.G0893900/AeUmb.PI5…	67	0.797619
CC	GO:0031090	organelle membrane	80	0.518128	1.80374	2.60896e-08	1.80573e-06	9.5321e-07	2365	tags=79%, list=36%, signal=51%	AeUmb.PI554389.v2.7U.G0840300/AeUmb.PI554389.v2.2U.G0122700/AeUmb.PI554389.v2.5U.G0353800/AeUmb.PI554389.v2.7U.G0173800/AeUmb.PI554389.v2.4U.G0163900/AeUmb.PI554389.v2.5U.G0414700/AeUmb.PI554389.v2.5U.G0335400/AeUmb.PI554389.v2.5U.G0791500/AeUmb.PI554389.v2.6U.G0443700/AeUmb.PI554389.v2.5U.G0319600/AeUmb.PI554389.v2.4U.G0893900/AeUmb.PI554389.v2.2U.G0909400/AeUmb.PI554389.v2.4U.G0374900/AeUmb.PI5…	63	0.7875
MF	GO:0003723	RNA binding	183	0.435594	1.60088	2.68709e-08	1.80573e-06	9.5321e-07	1991	tags=57%, list=30%, signal=41%	AeUmb.PI554389.v2.7U.G0127600/AeUmb.PI554389.v2.7U.G0203100/AeUmb.PI554389.v2.7U.G0198500/AeUmb.PI554389.v2.4U.G0980100/AeUmb.PI554389.v2.7U.G0274800/AeUmb.PI554389.v2.7U.G0123400/AeUmb.PI554389.v2.6U.G0295600/AeUmb.PI554389.v2.7U.G0779200/AeUmb.PI554389.v2.7U.G0329400/AeUmb.PI554389.v2.1U.G0437400/AeUmb.PI554389.v2.2U.G0005000/AeUmb.PI554389.v2.7U.G0154000/AeUmb.PI554389.v2.6U.G0421100/AeUmb.PI5…	105	0.57377
CC	GO:0032991	protein-containing complex	307	0.391154	1.46924	4.25235e-08	2.5978e-06	1.37133e-06	3195	tags=72%, list=49%, signal=39%	AeUmb.PI554389.v2.7U.G0273700/AeUmb.PI554389.v2.2U.G0322300/AeUmb.PI554389.v2.2U.G0058700/AeUmb.PI554389.v2.3U.G0195000/AeUmb.PI554389.v2.6U.G0436400/AeUmb.PI554389.v2.6U.G0151000/AeUmb.PI554389.v2.7U.G0123400/AeUmb.PI554389.v2.5U.G0353800/AeUmb.PI554389.v2.6U.G0187200/AeUmb.PI554389.v2.5U.G0414700/AeUmb.PI554389.v2.4U.G0131200/AeUmb.PI554389.v2.5U.G0180000/AeUmb.PI554389.v2.3U.G0204600/AeUmb.PI5…	221	0.71987
BP	GO:0046907	intracellular transport	69	0.526408	1.80968	2.77474e-07	1.50002e-05	7.91833e-06	2462	tags=80%, list=37%, signal=50%	AeUmb.PI554389.v2.2U.G0058700/AeUmb.PI554389.v2.3U.G0016100/AeUmb.PI554389.v2.6U.G0436400/AeUmb.PI554389.v2.4U.G0060400/AeUmb.PI554389.v2.5U.G0414700/AeUmb.PI554389.v2.2U.G0196900/AeUmb.PI554389.v2.6U.G0288300/AeUmb.PI554389.v2.4U.G0973500/AeUmb.PI554389.v2.6U.G0537000/AeUmb.PI554389.v2.7U.G0049700/AeUmb.PI554389.v2.4U.G0893900/AeUmb.PI554389.v2.2U.G0909400/AeUmb.PI554389.v2.6U.G0206400/AeUmb.PI5…	55	0.797101
BP	GO:0051649	establishment of localization in cell	70	0.520839	1.79243	2.90182e-07	1.50002e-05	7.91833e-06	2462	tags=79%, list=37%, signal=50%	AeUmb.PI554389.v2.2U.G0058700/AeUmb.PI554389.v2.3U.G0016100/AeUmb.PI554389.v2.6U.G0436400/AeUmb.PI554389.v2.4U.G0060400/AeUmb.PI554389.v2.5U.G0414700/AeUmb.PI554389.v2.2U.G0196900/AeUmb.PI554389.v2.6U.G0288300/AeUmb.PI554389.v2.4U.G0973500/AeUmb.PI554389.v2.6U.G0537000/AeUmb.PI554389.v2.7U.G0049700/AeUmb.PI554389.v2.4U.G0893900/AeUmb.PI554389.v2.2U.G0909400/AeUmb.PI554389.v2.6U.G0206400/AeUmb.PI5…	55	0.785714
BP	GO:1901566	organonitrogen compound biosynthetic process	215	0.407211	1.50771	5.66202e-07	2.53659e-05	1.33902e-05	3067	tags=72%, list=47%, signal=39%	AeUmb.PI554389.v2.5U.G0607900/AeUmb.PI554389.v2.6U.G0170300/AeUmb.PI554389.v2.6U.G0138600/AeUmb.PI554389.v2.3U.G0101900/AeUmb.PI554389.v2.6U.G0445900/AeUmb.PI554389.v2.5U.G0221000/AeUmb.PI554389.v2.6U.G0611800/AeUmb.PI554389.v2.6U.G0246900/AeUmb.PI554389.v2.1U.G0436800/AeUmb.PI554389.v2.3U.G0046300/AeUmb.PI554389.v2.2U.G0689700/AeUmb.PI554389.v2.2U.G0258100/AeUmb.PI554389.v2.6U.G0471900/AeUmb.PI5…	154	0.716279
BP	GO:0044271	cellular nitrogen compound biosynthetic process	426	0.359395	1.36336	5.4066e-07	2.53659e-05	1.33902e-05	3243	tags=67%, list=49%, signal=36%	AeUmb.PI554389.v2.2U.G0140100/AeUmb.PI554389.v2.2U.G0051000/AeUmb.PI554389.v2.5U.G0607900/AeUmb.PI554389.v2.5U.G0670500/AeUmb.PI554389.v2.6U.G0151000/AeUmb.PI554389.v2.4U.G0611700/AeUmb.PI554389.v2.7U.G0397300/AeUmb.PI554389.v2.3U.G0693800/AeUmb.PI554389.v2.6U.G0138600/AeUmb.PI554389.v2.3U.G0101900/AeUmb.PI554389.v2.5U.G0221000/AeUmb.PI554389.v2.6U.G0615700/AeUmb.PI554389.v2.7U.G0179100/AeUmb.PI5…	284	0.666667
BP	GO:0016070	RNA metabolic process	411	0.360623	1.36694	8.30142e-07	3.48659e-05	1.84051e-05	3258	tags=67%, list=50%, signal=36%	AeUmb.PI554389.v2.2U.G0140100/AeUmb.PI554389.v2.2U.G0051000/AeUmb.PI554389.v2.5U.G0670500/AeUmb.PI554389.v2.6U.G0151000/AeUmb.PI554389.v2.7U.G0123400/AeUmb.PI554389.v2.4U.G0611700/AeUmb.PI554389.v2.7U.G0397300/AeUmb.PI554389.v2.4U.G0131200/AeUmb.PI554389.v2.3U.G0693800/AeUmb.PI554389.v2.1U.G0232200/AeUmb.PI554389.v2.1U.G0437400/AeUmb.PI554389.v2.2U.G0269100/AeUmb.PI554389.v2.6U.G0615700/AeUmb.PI5…	276	0.671533
BP	GO:0071840	cellular component organization or biogenesis	197	0.406473	1.49955	1.48024e-06	5.85132e-05	3.08881e-05	2674	tags=60%, list=41%, signal=37%	AeUmb.PI554389.v2.4U.G0145000/AeUmb.PI554389.v2.5U.G0414700/AeUmb.PI554389.v2.4U.G0131200/AeUmb.PI554389.v2.2U.G0234200/AeUmb.PI554389.v2.5U.G0180000/AeUmb.PI554389.v2.3U.G0101900/AeUmb.PI554389.v2.2U.G0196900/AeUmb.PI554389.v2.5U.G0791500/AeUmb.PI554389.v2.6U.G0763700/AeUmb.PI554389.v2.6U.G0457200/AeUmb.PI554389.v2.6U.G0306600/AeUmb.PI554389.v2.7U.G0847800/AeUmb.PI554389.v2.6U.G0246900/AeUmb.PI5…	119	0.604061
MF	GO:0019001	guanyl nucleotide binding	54	0.535102	1.79853	2.08087e-06	7.76858e-05	4.10089e-05	1650	tags=69%, list=25%, signal=52%	AeUmb.PI554389.v2.3U.G0159400/AeUmb.PI554389.v2.4U.G0060400/AeUmb.PI554389.v2.3U.G0368700/AeUmb.PI554389.v2.4U.G0842400/AeUmb.PI554389.v2.5U.G0791500/AeUmb.PI554389.v2.3U.G0661200/AeUmb.PI554389.v2.3U.G0281900/AeUmb.PI554389.v2.5U.G0264100/AeUmb.PI554389.v2.1U.G0522300/AeUmb.PI554389.v2.6U.G0195800/AeUmb.PI554389.v2.3U.G0281300/AeUmb.PI554389.v2.7U.G0398200/AeUmb.PI554389.v2.7U.G0801400/AeUmb.PI5…	37	0.685185
BP	GO:0000723	telomere maintenance	12	-0.684194	-2.54219	4.52743e-06	0.000121711	6.42489e-05	2085	tags=100%, list=32%, signal=68%	AeUmb.PI554389.v2.6U.G0358100/AeUmb.PI554389.v2.1U.G0373300/AeUmb.PI554389.v2.6U.G0454000/AeUmb.PI554389.v2.5U.G0037400/AeUmb.PI554389.v2.1U.G0467100/AeUmb.PI554389.v2.2U.G0457300/AeUmb.PI554389.v2.7U.G0819400/AeUmb.PI554389.v2.2U.G0692900/AeUmb.PI554389.v2.7U.G1038300/AeUmb.PI554389.v2.1U.G0127100/AeUmb.PI554389.v2.7U.G0498900	11	0.916667
BP	GO:0032200	telomere organization	12	-0.684194	-2.54219	4.52743e-06	0.000121711	6.42489e-05	2085	tags=100%, list=32%, signal=68%	AeUmb.PI554389.v2.6U.G0358100/AeUmb.PI554389.v2.1U.G0373300/AeUmb.PI554389.v2.6U.G0454000/AeUmb.PI554389.v2.5U.G0037400/AeUmb.PI554389.v2.1U.G0467100/AeUmb.PI554389.v2.2U.G0457300/AeUmb.PI554389.v2.7U.G0819400/AeUmb.PI554389.v2.2U.G0692900/AeUmb.PI554389.v2.7U.G1038300/AeUmb.PI554389.v2.1U.G0127100/AeUmb.PI554389.v2.7U.G0498900	11	0.916667
BP	GO:0008104	protein localization	53	0.529278	1.77495	4.52792e-06	0.000121711	6.42489e-05	2454	tags=79%, list=37%, signal=50%	AeUmb.PI554389.v2.2U.G0058700/AeUmb.PI554389.v2.3U.G0016100/AeUmb.PI554389.v2.5U.G0414700/AeUmb.PI554389.v2.2U.G0196900/AeUmb.PI554389.v2.3U.G0661200/AeUmb.PI554389.v2.6U.G0537000/AeUmb.PI554389.v2.6U.G0443700/AeUmb.PI554389.v2.4U.G0893900/AeUmb.PI554389.v2.6U.G0195800/AeUmb.PI554389.v2.6U.G0239900/AeUmb.PI554389.v2.2U.G0229100/AeUmb.PI554389.v2.6U.G0585700/AeUmb.PI554389.v2.1U.G0283600/AeUmb.PI5…	42	0.792453
BP	GO:0045184	establishment of protein localization	53	0.529278	1.77495	4.52792e-06	0.000121711	6.42489e-05	2454	tags=79%, list=37%, signal=50%	AeUmb.PI554389.v2.2U.G0058700/AeUmb.PI554389.v2.3U.G0016100/AeUmb.PI554389.v2.5U.G0414700/AeUmb.PI554389.v2.2U.G0196900/AeUmb.PI554389.v2.3U.G0661200/AeUmb.PI554389.v2.6U.G0537000/AeUmb.PI554389.v2.6U.G0443700/AeUmb.PI554389.v2.4U.G0893900/AeUmb.PI554389.v2.6U.G0195800/AeUmb.PI554389.v2.6U.G0239900/AeUmb.PI554389.v2.2U.G0229100/AeUmb.PI554389.v2.6U.G0585700/AeUmb.PI554389.v2.1U.G0283600/AeUmb.PI5…	42	0.792453
BP	GO:0070727	cellular macromolecule localization	53	0.529278	1.77495	4.52792e-06	0.000121711	6.42489e-05	2454	tags=79%, list=37%, signal=50%	AeUmb.PI554389.v2.2U.G0058700/AeUmb.PI554389.v2.3U.G0016100/AeUmb.PI554389.v2.5U.G0414700/AeUmb.PI554389.v2.2U.G0196900/AeUmb.PI554389.v2.3U.G0661200/AeUmb.PI554389.v2.6U.G0537000/AeUmb.PI554389.v2.6U.G0443700/AeUmb.PI554389.v2.4U.G0893900/AeUmb.PI554389.v2.6U.G0195800/AeUmb.PI554389.v2.6U.G0239900/AeUmb.PI554389.v2.2U.G0229100/AeUmb.PI554389.v2.6U.G0585700/AeUmb.PI554389.v2.1U.G0283600/AeUmb.PI5…	42	0.792453
BP	GO:0006396	RNA processing	114	0.442893	1.58245	3.90578e-06	0.000121711	6.42489e-05	2712	tags=75%, list=41%, signal=45%	AeUmb.PI554389.v2.7U.G0123400/AeUmb.PI554389.v2.4U.G0131200/AeUmb.PI554389.v2.1U.G0232200/AeUmb.PI554389.v2.2U.G0269100/AeUmb.PI554389.v2.4U.G0576600/AeUmb.PI554389.v2.5U.G0495800/AeUmb.PI554389.v2.2U.G0339100/AeUmb.PI554389.v2.5U.G0519600/AeUmb.PI554389.v2.7U.G0066800/AeUmb.PI554389.v2.4U.G0926200/AeUmb.PI554389.v2.6U.G0426800/AeUmb.PI554389.v2.7U.G0155400/AeUmb.PI554389.v2.1U.G0284300/AeUmb.PI5…	85	0.745614
BP	GO:0044281	small molecule metabolic process	152	0.41606	1.51447	4.11316e-06	0.000121711	6.42489e-05	2812	tags=68%, list=43%, signal=40%	AeUmb.PI554389.v2.7U.G0273700/AeUmb.PI554389.v2.5U.G0260600/AeUmb.PI554389.v2.5U.G0607900/AeUmb.PI554389.v2.5U.G0512000/AeUmb.PI554389.v2.1U.G0223100/AeUmb.PI554389.v2.6U.G0170300/AeUmb.PI554389.v2.6U.G0138600/AeUmb.PI554389.v2.5U.G0221000/AeUmb.PI554389.v2.3U.G0222600/AeUmb.PI554389.v2.2U.G0222600/AeUmb.PI554389.v2.6U.G0611800/AeUmb.PI554389.v2.6U.G0324900/AeUmb.PI554389.v2.1U.G0436800/AeUmb.PI5…	103	0.677632
MF	GO:0003924	GTPase activity	46	0.544718	1.80333	5.08145e-06	0.000131336	6.93299e-05	1650	tags=70%, list=25%, signal=52%	AeUmb.PI554389.v2.3U.G0159400/AeUmb.PI554389.v2.4U.G0060400/AeUmb.PI554389.v2.3U.G0368700/AeUmb.PI554389.v2.4U.G0842400/AeUmb.PI554389.v2.5U.G0791500/AeUmb.PI554389.v2.3U.G0281900/AeUmb.PI554389.v2.5U.G0264100/AeUmb.PI554389.v2.1U.G0522300/AeUmb.PI554389.v2.6U.G0195800/AeUmb.PI554389.v2.3U.G0281300/AeUmb.PI554389.v2.7U.G0801400/AeUmb.PI554389.v2.1U.G0323500/AeUmb.PI554389.v2.1U.G0161900/AeUmb.PI5…	32	0.695652
MF	GO:0005525	GTP binding	51	0.536037	1.79181	7.57226e-06	0.000169619	8.95387e-05	1650	tags=69%, list=25%, signal=52%	AeUmb.PI554389.v2.3U.G0159400/AeUmb.PI554389.v2.4U.G0060400/AeUmb.PI554389.v2.3U.G0368700/AeUmb.PI554389.v2.4U.G0842400/AeUmb.PI554389.v2.5U.G0791500/AeUmb.PI554389.v2.3U.G0661200/AeUmb.PI554389.v2.3U.G0281900/AeUmb.PI554389.v2.5U.G0264100/AeUmb.PI554389.v2.1U.G0522300/AeUmb.PI554389.v2.6U.G0195800/AeUmb.PI554389.v2.3U.G0281300/AeUmb.PI554389.v2.7U.G0398200/AeUmb.PI554389.v2.1U.G0323500/AeUmb.PI5…	35	0.686275
MF	GO:0032561	guanyl ribonucleotide binding	51	0.536037	1.79181	7.57226e-06	0.000169619	8.95387e-05	1650	tags=69%, list=25%, signal=52%	AeUmb.PI554389.v2.3U.G0159400/AeUmb.PI554389.v2.4U.G0060400/AeUmb.PI554389.v2.3U.G0368700/AeUmb.PI554389.v2.4U.G0842400/AeUmb.PI554389.v2.5U.G0791500/AeUmb.PI554389.v2.3U.G0661200/AeUmb.PI554389.v2.3U.G0281900/AeUmb.PI554389.v2.5U.G0264100/AeUmb.PI554389.v2.1U.G0522300/AeUmb.PI554389.v2.6U.G0195800/AeUmb.PI554389.v2.3U.G0281300/AeUmb.PI554389.v2.7U.G0398200/AeUmb.PI554389.v2.1U.G0323500/AeUmb.PI5…	35	0.686275
BP	GO:1901575	organic substance catabolic process	89	0.462122	1.62407	7.57226e-06	0.000169619	8.95387e-05	2043	tags=60%, list=31%, signal=42%	AeUmb.PI554389.v2.1U.G0260700/AeUmb.PI554389.v2.6U.G0187200/AeUmb.PI554389.v2.2U.G0402700/AeUmb.PI554389.v2.1U.G0437400/AeUmb.PI554389.v2.6U.G0359700/AeUmb.PI554389.v2.6U.G0324900/AeUmb.PI554389.v2.7U.G0264500/AeUmb.PI554389.v2.3U.G0001100/AeUmb.PI554389.v2.1U.G0348700/AeUmb.PI554389.v2.4U.G0709700/AeUmb.PI554389.v2.4U.G0741200/AeUmb.PI554389.v2.6U.G0498400/AeUmb.PI554389.v2.3U.G0596600/AeUmb.PI5…	53	0.595506
BP	GO:0090304	nucleic acid metabolic process	493	0.341845	1.30278	7.57226e-06	0.000169619	8.95387e-05	3258	tags=63%, list=50%, signal=35%	AeUmb.PI554389.v2.2U.G0140100/AeUmb.PI554389.v2.2U.G0051000/AeUmb.PI554389.v2.5U.G0670500/AeUmb.PI554389.v2.6U.G0151000/AeUmb.PI554389.v2.7U.G0123400/AeUmb.PI554389.v2.4U.G0611700/AeUmb.PI554389.v2.7U.G0397300/AeUmb.PI554389.v2.4U.G0131200/AeUmb.PI554389.v2.3U.G0693800/AeUmb.PI554389.v2.1U.G0232200/AeUmb.PI554389.v2.1U.G0437400/AeUmb.PI554389.v2.2U.G0269100/AeUmb.PI554389.v2.6U.G0615700/AeUmb.PI5…	313	0.634888
BP	GO:0015031	protein transport	49	0.529532	1.76301	9.23951e-06	0.000200289	0.000105729	2454	tags=80%, list=37%, signal=50%	AeUmb.PI554389.v2.2U.G0058700/AeUmb.PI554389.v2.3U.G0016100/AeUmb.PI554389.v2.5U.G0414700/AeUmb.PI554389.v2.2U.G0196900/AeUmb.PI554389.v2.6U.G0537000/AeUmb.PI554389.v2.6U.G0443700/AeUmb.PI554389.v2.4U.G0893900/AeUmb.PI554389.v2.6U.G0195800/AeUmb.PI554389.v2.6U.G0239900/AeUmb.PI554389.v2.2U.G0229100/AeUmb.PI554389.v2.6U.G0585700/AeUmb.PI554389.v2.1U.G0283600/AeUmb.PI554389.v2.3U.G0154100/AeUmb.PI5…	39	0.795918
CC	GO:0098796	membrane protein complex	71	0.479769	1.65247	1.06289e-05	0.000223206	0.000117827	2987	tags=83%, list=45%, signal=46%	AeUmb.PI554389.v2.7U.G0273700/AeUmb.PI554389.v2.2U.G0058700/AeUmb.PI554389.v2.3U.G0195000/AeUmb.PI554389.v2.6U.G0436400/AeUmb.PI554389.v2.5U.G0353800/AeUmb.PI554389.v2.5U.G0414700/AeUmb.PI554389.v2.5U.G0784700/AeUmb.PI554389.v2.6U.G0537000/AeUmb.PI554389.v2.4U.G0893900/AeUmb.PI554389.v2.4U.G0374900/AeUmb.PI554389.v2.2U.G0229100/AeUmb.PI554389.v2.2U.G0463900/AeUmb.PI554389.v2.7U.G0589600/AeUmb.PI5…	59	0.830986
CC	GO:0016020	membrane	398	0.349373	1.32321	1.22961e-05	0.000250394	0.000132179	3118	tags=63%, list=47%, signal=35%	AeUmb.PI554389.v2.7U.G0273700/AeUmb.PI554389.v2.5U.G0283800/AeUmb.PI554389.v2.2U.G0058700/AeUmb.PI554389.v2.6U.G0460100/AeUmb.PI554389.v2.7U.G0840300/AeUmb.PI554389.v2.3U.G0016100/AeUmb.PI554389.v2.3U.G0195000/AeUmb.PI554389.v2.6U.G0436400/AeUmb.PI554389.v2.6U.G0149900/AeUmb.PI554389.v2.7U.G0070300/AeUmb.PI554389.v2.2U.G0122700/AeUmb.PI554389.v2.5U.G0353800/AeUmb.PI554389.v2.7U.G0173800/AeUmb.PI5…	251	0.630653
BP	GO:0071705	nitrogen compound transport	69	0.48318	1.66107	1.80118e-05	0.000355997	0.000187925	2454	tags=74%, list=37%, signal=47%	AeUmb.PI554389.v2.2U.G0058700/AeUmb.PI554389.v2.3U.G0016100/AeUmb.PI554389.v2.5U.G0414700/AeUmb.PI554389.v2.4U.G0849400/AeUmb.PI554389.v2.2U.G0196900/AeUmb.PI554389.v2.6U.G0537000/AeUmb.PI554389.v2.6U.G0443700/AeUmb.PI554389.v2.4U.G0893900/AeUmb.PI554389.v2.6U.G0195800/AeUmb.PI554389.v2.2U.G0894200/AeUmb.PI554389.v2.6U.G0239900/AeUmb.PI554389.v2.2U.G0229100/AeUmb.PI554389.v2.6U.G0585700/AeUmb.PI5…	51	0.73913
BP	GO:0033036	macromolecule localization	71	0.466011	1.60508	4.01302e-05	0.0007705	0.000406733	2454	tags=69%, list=37%, signal=44%	AeUmb.PI554389.v2.2U.G0058700/AeUmb.PI554389.v2.3U.G0016100/AeUmb.PI554389.v2.5U.G0414700/AeUmb.PI554389.v2.2U.G0196900/AeUmb.PI554389.v2.3U.G0661200/AeUmb.PI554389.v2.6U.G0537000/AeUmb.PI554389.v2.6U.G0443700/AeUmb.PI554389.v2.4U.G0893900/AeUmb.PI554389.v2.6U.G0195800/AeUmb.PI554389.v2.6U.G0239900/AeUmb.PI554389.v2.2U.G0229100/AeUmb.PI554389.v2.6U.G0585700/AeUmb.PI554389.v2.1U.G0283600/AeUmb.PI5…	49	0.690141
BP	GO:0016043	cellular component organization	163	0.393085	1.43611	4.57427e-05	0.000853864	0.00045074	2654	tags=57%, list=40%, signal=35%	AeUmb.PI554389.v2.4U.G0145000/AeUmb.PI554389.v2.5U.G0414700/AeUmb.PI554389.v2.4U.G0131200/AeUmb.PI554389.v2.2U.G0234200/AeUmb.PI554389.v2.5U.G0180000/AeUmb.PI554389.v2.3U.G0101900/AeUmb.PI554389.v2.2U.G0196900/AeUmb.PI554389.v2.5U.G0791500/AeUmb.PI554389.v2.6U.G0763700/AeUmb.PI554389.v2.6U.G0457200/AeUmb.PI554389.v2.6U.G0306600/AeUmb.PI554389.v2.7U.G0847800/AeUmb.PI554389.v2.6U.G0246900/AeUmb.PI5…	93	0.570552
BP	GO:0009056	catabolic process	113	0.424565	1.51587	4.79877e-05	0.000871561	0.000460082	2051	tags=52%, list=31%, signal=37%	AeUmb.PI554389.v2.1U.G0260700/AeUmb.PI554389.v2.6U.G0187200/AeUmb.PI554389.v2.2U.G0402700/AeUmb.PI554389.v2.1U.G0437400/AeUmb.PI554389.v2.1U.G0562200/AeUmb.PI554389.v2.6U.G0359700/AeUmb.PI554389.v2.7U.G0847800/AeUmb.PI554389.v2.6U.G0324900/AeUmb.PI554389.v2.7U.G0264500/AeUmb.PI554389.v2.3U.G0001100/AeUmb.PI554389.v2.1U.G0348700/AeUmb.PI554389.v2.4U.G0709700/AeUmb.PI554389.v2.4U.G0741200/AeUmb.PI5…	59	0.522124
BP	GO:0032196	transposition	13	-0.599238	-2.28411	5.77513e-05	0.00100104	0.000528429	2643	tags=100%, list=40%, signal=60%	AeUmb.PI554389.v2.2U.G0465300/AeUmb.PI554389.v2.5U.G0046200/AeUmb.PI554389.v2.6U.G0043100/AeUmb.PI554389.v2.3U.G0544200/AeUmb.PI554389.v2.7U.G0551000/AeUmb.PI554389.v2.7U.G0971600/AeUmb.PI554389.v2.1U.G0052100/AeUmb.PI554389.v2.4U.G0102300/AeUmb.PI554389.v2.7U.G0720100/AeUmb.PI554389.v2.5U.G0626000/AeUmb.PI554389.v2.2U.G0464800/AeUmb.PI554389.v2.6U.G0295200	12	0.923077
CC	GO:1902494	catalytic complex	113	0.421301	1.50422	5.80958e-05	0.00100104	0.000528429	2989	tags=74%, list=45%, signal=41%	AeUmb.PI554389.v2.7U.G0273700/AeUmb.PI554389.v2.2U.G0322300/AeUmb.PI554389.v2.3U.G0195000/AeUmb.PI554389.v2.6U.G0151000/AeUmb.PI554389.v2.5U.G0353800/AeUmb.PI554389.v2.6U.G0187200/AeUmb.PI554389.v2.5U.G0180000/AeUmb.PI554389.v2.5U.G0784700/AeUmb.PI554389.v2.6U.G0457200/AeUmb.PI554389.v2.5U.G0319600/AeUmb.PI554389.v2.4U.G0709700/AeUmb.PI554389.v2.4U.G0374900/AeUmb.PI554389.v2.4U.G0160900/AeUmb.PI5…	84	0.743363
BP	GO:0016192	vesicle-mediated transport	63	0.473499	1.61456	7.38884e-05	0.00124133	0.000655274	2643	tags=75%, list=40%, signal=45%	AeUmb.PI554389.v2.2U.G0058700/AeUmb.PI554389.v2.4U.G0145000/AeUmb.PI554389.v2.3U.G0016100/AeUmb.PI554389.v2.6U.G0436400/AeUmb.PI554389.v2.5U.G0414700/AeUmb.PI554389.v2.6U.G0288300/AeUmb.PI554389.v2.6U.G0537000/AeUmb.PI554389.v2.7U.G0049700/AeUmb.PI554389.v2.4U.G0893900/AeUmb.PI554389.v2.2U.G0909400/AeUmb.PI554389.v2.6U.G0206400/AeUmb.PI554389.v2.2U.G0791300/AeUmb.PI554389.v2.2U.G0347700/AeUmb.PI5…	47	0.746032
CC	GO:0031966	mitochondrial membrane	34	0.561946	1.79396	8.30207e-05	0.00136073	0.000718305	2317	tags=85%, list=35%, signal=56%	AeUmb.PI554389.v2.7U.G0840300/AeUmb.PI554389.v2.5U.G0353800/AeUmb.PI554389.v2.4U.G0163900/AeUmb.PI554389.v2.5U.G0335400/AeUmb.PI554389.v2.5U.G0791500/AeUmb.PI554389.v2.4U.G0374900/AeUmb.PI554389.v2.2U.G0229100/AeUmb.PI554389.v2.3U.G0182800/AeUmb.PI554389.v2.7U.G0589600/AeUmb.PI554389.v2.5U.G0776500/AeUmb.PI554389.v2.3U.G0190800/AeUmb.PI554389.v2.7U.G0988100/AeUmb.PI554389.v2.7U.G0604800/AeUmb.PI5…	29	0.852941
CC	GO:0031967	organelle envelope	45	0.51044	1.68594	9.42027e-05	0.00147219	0.000777144	2317	tags=76%, list=35%, signal=49%	AeUmb.PI554389.v2.7U.G0840300/AeUmb.PI554389.v2.5U.G0353800/AeUmb.PI554389.v2.4U.G0163900/AeUmb.PI554389.v2.5U.G0335400/AeUmb.PI554389.v2.5U.G0791500/AeUmb.PI554389.v2.4U.G0973500/AeUmb.PI554389.v2.5U.G0319600/AeUmb.PI554389.v2.4U.G0374900/AeUmb.PI554389.v2.2U.G0229100/AeUmb.PI554389.v2.3U.G0182800/AeUmb.PI554389.v2.7U.G0589600/AeUmb.PI554389.v2.5U.G0776500/AeUmb.PI554389.v2.3U.G0190800/AeUmb.PI5…	34	0.755556
CC	GO:0031975	envelope	45	0.51044	1.68594	9.42027e-05	0.00147219	0.000777144	2317	tags=76%, list=35%, signal=49%	AeUmb.PI554389.v2.7U.G0840300/AeUmb.PI554389.v2.5U.G0353800/AeUmb.PI554389.v2.4U.G0163900/AeUmb.PI554389.v2.5U.G0335400/AeUmb.PI554389.v2.5U.G0791500/AeUmb.PI554389.v2.4U.G0973500/AeUmb.PI554389.v2.5U.G0319600/AeUmb.PI554389.v2.4U.G0374900/AeUmb.PI554389.v2.2U.G0229100/AeUmb.PI554389.v2.3U.G0182800/AeUmb.PI554389.v2.7U.G0589600/AeUmb.PI554389.v2.5U.G0776500/AeUmb.PI554389.v2.3U.G0190800/AeUmb.PI5…	34	0.755556
MF	GO:0022853	active monoatomic ion transmembrane transporter activity	19	0.648058	1.90297	0.000100066	0.00152828	0.000806754	962	tags=63%, list=15%, signal=54%	AeUmb.PI554389.v2.7U.G0273700/AeUmb.PI554389.v2.6U.G0460100/AeUmb.PI554389.v2.3U.G0195000/AeUmb.PI554389.v2.6U.G0149900/AeUmb.PI554389.v2.7U.G0070300/AeUmb.PI554389.v2.7U.G1028000/AeUmb.PI554389.v2.4U.G0432400/AeUmb.PI554389.v2.2U.G0672700/AeUmb.PI554389.v2.2U.G0463900/AeUmb.PI554389.v2.5U.G0316300/AeUmb.PI554389.v2.3U.G0224900/AeUmb.PI554389.v2.5U.G0629600	12	0.631579
BP	GO:1901565	organonitrogen compound catabolic process	66	0.464744	1.59158	0.000108858	0.00162561	0.000858132	2043	tags=61%, list=31%, signal=42%	AeUmb.PI554389.v2.1U.G0260700/AeUmb.PI554389.v2.6U.G0187200/AeUmb.PI554389.v2.2U.G0402700/AeUmb.PI554389.v2.6U.G0359700/AeUmb.PI554389.v2.7U.G0264500/AeUmb.PI554389.v2.3U.G0001100/AeUmb.PI554389.v2.1U.G0348700/AeUmb.PI554389.v2.4U.G0709700/AeUmb.PI554389.v2.6U.G0498400/AeUmb.PI554389.v2.4U.G0248600/AeUmb.PI554389.v2.3U.G0308100/AeUmb.PI554389.v2.4U.G0825400/AeUmb.PI554389.v2.5U.G0481500/AeUmb.PI5…	40	0.606061
MF	GO:0016791	phosphatase activity	57	0.476031	1.60899	0.000114498	0.00167267	0.000882973	2024	tags=65%, list=31%, signal=45%	AeUmb.PI554389.v2.4U.G0742900/AeUmb.PI554389.v2.3U.G0119000/AeUmb.PI554389.v2.3U.G0166400/AeUmb.PI554389.v2.4U.G0926200/AeUmb.PI554389.v2.5U.G0457800/AeUmb.PI554389.v2.4U.G0469500/AeUmb.PI554389.v2.6U.G0052600/AeUmb.PI554389.v2.6U.G0461000/AeUmb.PI554389.v2.5U.G0006800/AeUmb.PI554389.v2.5U.G0216400/AeUmb.PI554389.v2.4U.G0031000/AeUmb.PI554389.v2.7U.G0549100/AeUmb.PI554389.v2.5U.G0806400/AeUmb.PI5…	37	0.649123
CC	GO:0005634	nucleus	145	0.396877	1.43997	0.000119033	0.00170191	0.00089841	3185	tags=77%, list=48%, signal=41%	AeUmb.PI554389.v2.6U.G0151000/AeUmb.PI554389.v2.7U.G0123400/AeUmb.PI554389.v2.4U.G0131200/AeUmb.PI554389.v2.5U.G0180000/AeUmb.PI554389.v2.6U.G0615700/AeUmb.PI554389.v2.7U.G0179100/AeUmb.PI554389.v2.4U.G0973500/AeUmb.PI554389.v2.6U.G0457200/AeUmb.PI554389.v2.6U.G0306600/AeUmb.PI554389.v2.1U.G0192500/AeUmb.PI554389.v2.5U.G0619800/AeUmb.PI554389.v2.7U.G0066800/AeUmb.PI554389.v2.6U.G0426800/AeUmb.PI5…	112	0.772414
CC	GO:0005740	mitochondrial envelope	36	0.530914	1.70683	0.000128217	0.00172324	0.000909665	2453	tags=83%, list=37%, signal=53%	AeUmb.PI554389.v2.7U.G0840300/AeUmb.PI554389.v2.5U.G0353800/AeUmb.PI554389.v2.4U.G0163900/AeUmb.PI554389.v2.5U.G0335400/AeUmb.PI554389.v2.5U.G0791500/AeUmb.PI554389.v2.4U.G0374900/AeUmb.PI554389.v2.2U.G0229100/AeUmb.PI554389.v2.3U.G0182800/AeUmb.PI554389.v2.7U.G0589600/AeUmb.PI554389.v2.5U.G0776500/AeUmb.PI554389.v2.3U.G0190800/AeUmb.PI554389.v2.7U.G0988100/AeUmb.PI554389.v2.7U.G0604800/AeUmb.PI5…	30	0.833333
CC	GO:0005739	mitochondrion	45	0.507095	1.67489	0.000125847	0.00172324	0.000909665	2317	tags=76%, list=35%, signal=49%	AeUmb.PI554389.v2.7U.G0840300/AeUmb.PI554389.v2.5U.G0353800/AeUmb.PI554389.v2.4U.G0163900/AeUmb.PI554389.v2.5U.G0335400/AeUmb.PI554389.v2.5U.G0791500/AeUmb.PI554389.v2.4U.G0374900/AeUmb.PI554389.v2.2U.G0229100/AeUmb.PI554389.v2.3U.G0182800/AeUmb.PI554389.v2.7U.G0589600/AeUmb.PI554389.v2.5U.G0776500/AeUmb.PI554389.v2.3U.G0190800/AeUmb.PI554389.v2.7U.G0988100/AeUmb.PI554389.v2.7U.G0604800/AeUmb.PI5…	34	0.755556
BP	GO:0019752	carboxylic acid metabolic process	76	0.443625	1.53798	0.000125834	0.00172324	0.000909665	1813	tags=53%, list=28%, signal=39%	AeUmb.PI554389.v2.5U.G0512000/AeUmb.PI554389.v2.6U.G0170300/AeUmb.PI554389.v2.6U.G0138600/AeUmb.PI554389.v2.3U.G0222600/AeUmb.PI554389.v2.6U.G0611800/AeUmb.PI554389.v2.6U.G0324900/AeUmb.PI554389.v2.1U.G0436800/AeUmb.PI554389.v2.3U.G0001100/AeUmb.PI554389.v2.4U.G0248600/AeUmb.PI554389.v2.3U.G0155100/AeUmb.PI554389.v2.7U.G1029500/AeUmb.PI554389.v2.3U.G0481800/AeUmb.PI554389.v2.6U.G0554800/AeUmb.PI5…	40	0.526316
MF	GO:0016818	hydrolase activity, acting on acid anhydrides, in phosphorus-containing anhydrides	140	0.389251	1.40988	0.000180248	0.00237503	0.00125374	2204	tags=54%, list=34%, signal=36%	AeUmb.PI554389.v2.6U.G0183200/AeUmb.PI554389.v2.3U.G0159400/AeUmb.PI554389.v2.4U.G0060400/AeUmb.PI554389.v2.6U.G0149900/AeUmb.PI554389.v2.7U.G0070300/AeUmb.PI554389.v2.3U.G0368700/AeUmb.PI554389.v2.6U.G0325800/AeUmb.PI554389.v2.4U.G0842400/AeUmb.PI554389.v2.5U.G0791500/AeUmb.PI554389.v2.3U.G0661200/AeUmb.PI554389.v2.7U.G0298800/AeUmb.PI554389.v2.3U.G0281900/AeUmb.PI554389.v2.5U.G0264100/AeUmb.PI5…	75	0.535714
MF	GO:0140096	catalytic activity, acting on a protein	484	0.325066	1.23823	0.000193851	0.00250516	0.00132243	3041	tags=55%, list=46%, signal=32%	AeUmb.PI554389.v2.2U.G0051000/AeUmb.PI554389.v2.4U.G0742900/AeUmb.PI554389.v2.6U.G0251300/AeUmb.PI554389.v2.7U.G0122600/AeUmb.PI554389.v2.4U.G0045100/AeUmb.PI554389.v2.1U.G0363500/AeUmb.PI554389.v2.2U.G0031400/AeUmb.PI554389.v2.2U.G0158000/AeUmb.PI554389.v2.1U.G0260700/AeUmb.PI554389.v2.6U.G0411400/AeUmb.PI554389.v2.2U.G0043300/AeUmb.PI554389.v2.6U.G0447300/AeUmb.PI554389.v2.5U.G0795000/AeUmb.PI5…	268	0.553719
CC	GO:0098588	bounding membrane of organelle	28	0.55197	1.71988	0.000210353	0.0026663	0.00140749	2365	tags=82%, list=36%, signal=53%	AeUmb.PI554389.v2.4U.G0163900/AeUmb.PI554389.v2.5U.G0414700/AeUmb.PI554389.v2.5U.G0335400/AeUmb.PI554389.v2.5U.G0791500/AeUmb.PI554389.v2.5U.G0319600/AeUmb.PI554389.v2.4U.G0893900/AeUmb.PI554389.v2.1U.G0283600/AeUmb.PI554389.v2.3U.G0182800/AeUmb.PI554389.v2.2U.G0463900/AeUmb.PI554389.v2.7U.G0604800/AeUmb.PI554389.v2.1U.G0511200/AeUmb.PI554389.v2.3U.G0314900/AeUmb.PI554389.v2.7U.G0163000/AeUmb.PI5…	23	0.821429
CC	GO:0012505	endomembrane system	62	0.473011	1.61093	0.000214257	0.0026663	0.00140749	2985	tags=85%, list=45%, signal=47%	AeUmb.PI554389.v2.6U.G0436400/AeUmb.PI554389.v2.2U.G0122700/AeUmb.PI554389.v2.7U.G0173800/AeUmb.PI554389.v2.5U.G0414700/AeUmb.PI554389.v2.1U.G0562200/AeUmb.PI554389.v2.4U.G0973500/AeUmb.PI554389.v2.6U.G0443700/AeUmb.PI554389.v2.4U.G0893900/AeUmb.PI554389.v2.3U.G0433000/AeUmb.PI554389.v2.2U.G0909400/AeUmb.PI554389.v2.6U.G0239900/AeUmb.PI554389.v2.4U.G0716400/AeUmb.PI554389.v2.4U.G0791100/AeUmb.PI5…	53	0.854839
BP	GO:0006091	generation of precursor metabolites and energy	51	0.491394	1.64258	0.000223326	0.00272863	0.0014404	3085	tags=88%, list=47%, signal=47%	AeUmb.PI554389.v2.2U.G0096000/AeUmb.PI554389.v2.7U.G0306900/AeUmb.PI554389.v2.5U.G0175000/AeUmb.PI554389.v2.2U.G0222600/AeUmb.PI554389.v2.6U.G0309500/AeUmb.PI554389.v2.5U.G0319600/AeUmb.PI554389.v2.3U.G0001100/AeUmb.PI554389.v2.4U.G0248600/AeUmb.PI554389.v2.7U.G0589600/AeUmb.PI554389.v2.5U.G0317700/AeUmb.PI554389.v2.1U.G0218400/AeUmb.PI554389.v2.5U.G0776500/AeUmb.PI554389.v2.5U.G0507300/AeUmb.PI5…	45	0.882353
BP	GO:0043604	amide biosynthetic process	113	0.407832	1.45613	0.000230127	0.00276153	0.00145776	3106	tags=75%, list=47%, signal=40%	AeUmb.PI554389.v2.3U.G0101900/AeUmb.PI554389.v2.6U.G0611800/AeUmb.PI554389.v2.6U.G0246900/AeUmb.PI554389.v2.2U.G0258100/AeUmb.PI554389.v2.1U.G0455600/AeUmb.PI554389.v2.6U.G0379800/AeUmb.PI554389.v2.2U.G0207500/AeUmb.PI554389.v2.5U.G0288400/AeUmb.PI554389.v2.1U.G0228200/AeUmb.PI554389.v2.7U.G0906600/AeUmb.PI554389.v2.7U.G0197700/AeUmb.PI554389.v2.2U.G0070100/AeUmb.PI554389.v2.7U.G0874300/AeUmb.PI5…	85	0.752212
BP	GO:0006886	intracellular protein transport	39	0.519883	1.68733	0.000239432	0.00277411	0.00146441	2454	tags=77%, list=37%, signal=48%	AeUmb.PI554389.v2.2U.G0058700/AeUmb.PI554389.v2.3U.G0016100/AeUmb.PI554389.v2.5U.G0414700/AeUmb.PI554389.v2.2U.G0196900/AeUmb.PI554389.v2.6U.G0537000/AeUmb.PI554389.v2.4U.G0893900/AeUmb.PI554389.v2.6U.G0239900/AeUmb.PI554389.v2.2U.G0229100/AeUmb.PI554389.v2.1U.G0283600/AeUmb.PI554389.v2.3U.G0154100/AeUmb.PI554389.v2.7U.G0235700/AeUmb.PI554389.v2.1U.G0358600/AeUmb.PI554389.v2.6U.G0293300/AeUmb.PI5…	30	0.769231
BP	GO:0044085	cellular component biogenesis	100	0.420517	1.48928	0.000239241	0.00277411	0.00146441	2674	tags=67%, list=41%, signal=40%	AeUmb.PI554389.v2.4U.G0145000/AeUmb.PI554389.v2.4U.G0131200/AeUmb.PI554389.v2.7U.G0847800/AeUmb.PI554389.v2.6U.G0426800/AeUmb.PI554389.v2.2U.G0152200/AeUmb.PI554389.v2.3U.G0260300/AeUmb.PI554389.v2.5U.G0390300/AeUmb.PI554389.v2.7U.G0703400/AeUmb.PI554389.v2.2U.G0345100/AeUmb.PI554389.v2.5U.G0409600/AeUmb.PI554389.v2.1U.G0265300/AeUmb.PI554389.v2.6U.G0464400/AeUmb.PI554389.v2.5U.G0746700/AeUmb.PI5…	67	0.67
BP	GO:0065007	biological regulation	361	0.337138	1.27337	0.000243798	0.00277682	0.00146583	3258	tags=62%, list=50%, signal=33%	AeUmb.PI554389.v2.2U.G0140100/AeUmb.PI554389.v2.2U.G0051000/AeUmb.PI554389.v2.2U.G0322300/AeUmb.PI554389.v2.5U.G0670500/AeUmb.PI554389.v2.1U.G0260700/AeUmb.PI554389.v2.4U.G0611700/AeUmb.PI554389.v2.6U.G0187200/AeUmb.PI554389.v2.1U.G0437400/AeUmb.PI554389.v2.5U.G0834600/AeUmb.PI554389.v2.5U.G0791500/AeUmb.PI554389.v2.4U.G0829500/AeUmb.PI554389.v2.6U.G0615700/AeUmb.PI554389.v2.1U.G0562200/AeUmb.PI5…	224	0.620499
MF	GO:0008237	metallopeptidase activity	27	0.559486	1.73543	0.000290324	0.00313518	0.00165501	2282	tags=74%, list=35%, signal=49%	AeUmb.PI554389.v2.7U.G0122600/AeUmb.PI554389.v2.2U.G0320300/AeUmb.PI554389.v2.6U.G0402600/AeUmb.PI554389.v2.7U.G0233400/AeUmb.PI554389.v2.3U.G0260300/AeUmb.PI554389.v2.6U.G0422100/AeUmb.PI554389.v2.3U.G0158900/AeUmb.PI554389.v2.2U.G0667600/AeUmb.PI554389.v2.3U.G0125900/AeUmb.PI554389.v2.7U.G0909200/AeUmb.PI554389.v2.6U.G0589100/AeUmb.PI554389.v2.7U.G0257600/AeUmb.PI554389.v2.3U.G0375700/AeUmb.PI5…	20	0.740741
BP	GO:0016071	mRNA metabolic process	59	0.459491	1.55809	0.000293923	0.00313518	0.00165501	2516	tags=73%, list=38%, signal=45%	AeUmb.PI554389.v2.4U.G0131200/AeUmb.PI554389.v2.1U.G0232200/AeUmb.PI554389.v2.1U.G0437400/AeUmb.PI554389.v2.4U.G0576600/AeUmb.PI554389.v2.5U.G0495800/AeUmb.PI554389.v2.2U.G0339100/AeUmb.PI554389.v2.5U.G0519600/AeUmb.PI554389.v2.7U.G0066800/AeUmb.PI554389.v2.4U.G0926200/AeUmb.PI554389.v2.6U.G0426800/AeUmb.PI554389.v2.7U.G0155400/AeUmb.PI554389.v2.1U.G0284300/AeUmb.PI554389.v2.6U.G0307300/AeUmb.PI5…	43	0.728814
MF	GO:0016462	pyrophosphatase activity	138	0.389036	1.40807	0.000280253	0.00313518	0.00165501	2204	tags=54%, list=34%, signal=36%	AeUmb.PI554389.v2.6U.G0183200/AeUmb.PI554389.v2.3U.G0159400/AeUmb.PI554389.v2.4U.G0060400/AeUmb.PI554389.v2.6U.G0149900/AeUmb.PI554389.v2.7U.G0070300/AeUmb.PI554389.v2.3U.G0368700/AeUmb.PI554389.v2.6U.G0325800/AeUmb.PI554389.v2.4U.G0842400/AeUmb.PI554389.v2.5U.G0791500/AeUmb.PI554389.v2.3U.G0661200/AeUmb.PI554389.v2.7U.G0298800/AeUmb.PI554389.v2.3U.G0281900/AeUmb.PI554389.v2.5U.G0264100/AeUmb.PI5…	74	0.536232
MF	GO:0016817	hydrolase activity, acting on acid anhydrides	141	0.385196	1.39574	0.000289366	0.00313518	0.00165501	2204	tags=53%, list=34%, signal=36%	AeUmb.PI554389.v2.6U.G0183200/AeUmb.PI554389.v2.3U.G0159400/AeUmb.PI554389.v2.4U.G0060400/AeUmb.PI554389.v2.6U.G0149900/AeUmb.PI554389.v2.7U.G0070300/AeUmb.PI554389.v2.3U.G0368700/AeUmb.PI554389.v2.6U.G0325800/AeUmb.PI554389.v2.4U.G0842400/AeUmb.PI554389.v2.5U.G0791500/AeUmb.PI554389.v2.3U.G0661200/AeUmb.PI554389.v2.7U.G0298800/AeUmb.PI554389.v2.3U.G0281900/AeUmb.PI554389.v2.5U.G0264100/AeUmb.PI5…	75	0.531915
BP	GO:0043436	oxoacid metabolic process	78	0.430129	1.4943	0.000339492	0.00350982	0.00185277	1813	tags=51%, list=28%, signal=38%	AeUmb.PI554389.v2.5U.G0512000/AeUmb.PI554389.v2.6U.G0170300/AeUmb.PI554389.v2.6U.G0138600/AeUmb.PI554389.v2.3U.G0222600/AeUmb.PI554389.v2.6U.G0611800/AeUmb.PI554389.v2.6U.G0324900/AeUmb.PI554389.v2.1U.G0436800/AeUmb.PI554389.v2.3U.G0001100/AeUmb.PI554389.v2.4U.G0248600/AeUmb.PI554389.v2.3U.G0155100/AeUmb.PI554389.v2.7U.G1029500/AeUmb.PI554389.v2.3U.G0481800/AeUmb.PI554389.v2.6U.G0554800/AeUmb.PI5…	40	0.512821
BP	GO:0050794	regulation of cellular process	330	0.338705	1.27541	0.000339492	0.00350982	0.00185277	3258	tags=62%, list=50%, signal=33%	AeUmb.PI554389.v2.2U.G0140100/AeUmb.PI554389.v2.2U.G0051000/AeUmb.PI554389.v2.2U.G0322300/AeUmb.PI554389.v2.5U.G0670500/AeUmb.PI554389.v2.1U.G0260700/AeUmb.PI554389.v2.4U.G0611700/AeUmb.PI554389.v2.1U.G0437400/AeUmb.PI554389.v2.5U.G0834600/AeUmb.PI554389.v2.5U.G0791500/AeUmb.PI554389.v2.4U.G0829500/AeUmb.PI554389.v2.6U.G0615700/AeUmb.PI554389.v2.1U.G0562200/AeUmb.PI554389.v2.4U.G0390700/AeUmb.PI5…	206	0.624242
MF	GO:0004721	phosphoprotein phosphatase activity	28	0.542557	1.69055	0.000367937	0.00374626	0.00197759	2024	tags=79%, list=31%, signal=55%	AeUmb.PI554389.v2.4U.G0742900/AeUmb.PI554389.v2.3U.G0166400/AeUmb.PI554389.v2.4U.G0926200/AeUmb.PI554389.v2.5U.G0457800/AeUmb.PI554389.v2.4U.G0469500/AeUmb.PI554389.v2.6U.G0461000/AeUmb.PI554389.v2.4U.G0031000/AeUmb.PI554389.v2.5U.G0315400/AeUmb.PI554389.v2.5U.G0782700/AeUmb.PI554389.v2.5U.G0323200/AeUmb.PI554389.v2.1U.G0176400/AeUmb.PI554389.v2.5U.G0815300/AeUmb.PI554389.v2.2U.G0253100/AeUmb.PI5…	22	0.785714
BP	GO:0019637	organophosphate metabolic process	88	0.41898	1.47094	0.000375947	0.00377069	0.00199048	3124	tags=77%, list=48%, signal=41%	AeUmb.PI554389.v2.7U.G0273700/AeUmb.PI554389.v2.5U.G0607900/AeUmb.PI554389.v2.1U.G0223100/AeUmb.PI554389.v2.2U.G0222600/AeUmb.PI554389.v2.6U.G0611800/AeUmb.PI554389.v2.3U.G0001100/AeUmb.PI554389.v2.3U.G0046300/AeUmb.PI554389.v2.2U.G0689700/AeUmb.PI554389.v2.7U.G0532800/AeUmb.PI554389.v2.4U.G0248600/AeUmb.PI554389.v2.4U.G0915500/AeUmb.PI554389.v2.1U.G0319100/AeUmb.PI554389.v2.5U.G0707900/AeUmb.PI5…	68	0.772727
BP	GO:0044282	small molecule catabolic process	10	0.715285	1.84249	0.000447185	0.00441924	0.00233284	999	tags=70%, list=15%, signal=59%	AeUmb.PI554389.v2.6U.G0324900/AeUmb.PI554389.v2.3U.G0596600/AeUmb.PI554389.v2.7U.G0861700/AeUmb.PI554389.v2.5U.G0433000/AeUmb.PI554389.v2.5U.G0511800/AeUmb.PI554389.v2.7U.G0719600/AeUmb.PI554389.v2.6U.G0590000	7	0.7
BP	GO:0055086	nucleobase-containing small molecule metabolic process	58	0.454386	1.53818	0.000462527	0.00446441	0.00235668	3013	tags=79%, list=46%, signal=43%	AeUmb.PI554389.v2.7U.G0273700/AeUmb.PI554389.v2.5U.G0607900/AeUmb.PI554389.v2.1U.G0223100/AeUmb.PI554389.v2.5U.G0221000/AeUmb.PI554389.v2.2U.G0222600/AeUmb.PI554389.v2.6U.G0611800/AeUmb.PI554389.v2.3U.G0001100/AeUmb.PI554389.v2.3U.G0046300/AeUmb.PI554389.v2.7U.G0532800/AeUmb.PI554389.v2.4U.G0248600/AeUmb.PI554389.v2.4U.G0915500/AeUmb.PI554389.v2.5U.G0707900/AeUmb.PI554389.v2.5U.G0605400/AeUmb.PI5…	46	0.793103
BP	GO:0006412	translation	106	0.402978	1.43294	0.000471686	0.00446441	0.00235668	3106	tags=75%, list=47%, signal=40%	AeUmb.PI554389.v2.3U.G0101900/AeUmb.PI554389.v2.6U.G0246900/AeUmb.PI554389.v2.2U.G0258100/AeUmb.PI554389.v2.1U.G0455600/AeUmb.PI554389.v2.2U.G0207500/AeUmb.PI554389.v2.5U.G0288400/AeUmb.PI554389.v2.1U.G0228200/AeUmb.PI554389.v2.7U.G0906600/AeUmb.PI554389.v2.7U.G0197700/AeUmb.PI554389.v2.2U.G0070100/AeUmb.PI554389.v2.7U.G0874300/AeUmb.PI554389.v2.2U.G0144700/AeUmb.PI554389.v2.7U.G0238500/AeUmb.PI5…	79	0.745283
BP	GO:0043043	peptide biosynthetic process	106	0.402978	1.43294	0.000471686	0.00446441	0.00235668	3106	tags=75%, list=47%, signal=40%	AeUmb.PI554389.v2.3U.G0101900/AeUmb.PI554389.v2.6U.G0246900/AeUmb.PI554389.v2.2U.G0258100/AeUmb.PI554389.v2.1U.G0455600/AeUmb.PI554389.v2.2U.G0207500/AeUmb.PI554389.v2.5U.G0288400/AeUmb.PI554389.v2.1U.G0228200/AeUmb.PI554389.v2.7U.G0906600/AeUmb.PI554389.v2.7U.G0197700/AeUmb.PI554389.v2.2U.G0070100/AeUmb.PI554389.v2.7U.G0874300/AeUmb.PI554389.v2.2U.G0144700/AeUmb.PI554389.v2.7U.G0238500/AeUmb.PI5…	79	0.745283
BP	GO:1901135	carbohydrate derivative metabolic process	88	0.415355	1.45821	0.000508321	0.0046161	0.00243676	2885	tags=70%, list=44%, signal=40%	AeUmb.PI554389.v2.7U.G0273700/AeUmb.PI554389.v2.1U.G0223100/AeUmb.PI554389.v2.6U.G0445900/AeUmb.PI554389.v2.2U.G0222600/AeUmb.PI554389.v2.6U.G0611800/AeUmb.PI554389.v2.3U.G0001100/AeUmb.PI554389.v2.3U.G0046300/AeUmb.PI554389.v2.1U.G0348700/AeUmb.PI554389.v2.2U.G0689700/AeUmb.PI554389.v2.7U.G0532800/AeUmb.PI554389.v2.4U.G0248600/AeUmb.PI554389.v2.3U.G0308100/AeUmb.PI554389.v2.5U.G0605400/AeUmb.PI5…	62	0.704545
BP	GO:0018130	heterocycle biosynthetic process	313	0.340422	1.27962	0.000499162	0.0046161	0.00243676	3258	tags=64%, list=50%, signal=34%	AeUmb.PI554389.v2.2U.G0140100/AeUmb.PI554389.v2.2U.G0051000/AeUmb.PI554389.v2.5U.G0607900/AeUmb.PI554389.v2.5U.G0670500/AeUmb.PI554389.v2.6U.G0151000/AeUmb.PI554389.v2.4U.G0611700/AeUmb.PI554389.v2.7U.G0397300/AeUmb.PI554389.v2.3U.G0693800/AeUmb.PI554389.v2.6U.G0138600/AeUmb.PI554389.v2.5U.G0221000/AeUmb.PI554389.v2.6U.G0615700/AeUmb.PI554389.v2.7U.G0179100/AeUmb.PI554389.v2.4U.G0390700/AeUmb.PI5…	200	0.638978
BP	GO:1901362	organic cyclic compound biosynthetic process	318	0.339683	1.27754	0.000508321	0.0046161	0.00243676	3288	tags=64%, list=50%, signal=34%	AeUmb.PI554389.v2.2U.G0140100/AeUmb.PI554389.v2.2U.G0051000/AeUmb.PI554389.v2.5U.G0607900/AeUmb.PI554389.v2.5U.G0670500/AeUmb.PI554389.v2.6U.G0151000/AeUmb.PI554389.v2.4U.G0611700/AeUmb.PI554389.v2.7U.G0397300/AeUmb.PI554389.v2.3U.G0693800/AeUmb.PI554389.v2.6U.G0138600/AeUmb.PI554389.v2.5U.G0221000/AeUmb.PI554389.v2.6U.G0615700/AeUmb.PI554389.v2.7U.G0179100/AeUmb.PI554389.v2.4U.G0390700/AeUmb.PI5…	205	0.644654
BP	GO:0006397	mRNA processing	56	0.463438	1.56375	0.000526638	0.00471868	0.00249091	2516	tags=73%, list=38%, signal=46%	AeUmb.PI554389.v2.4U.G0131200/AeUmb.PI554389.v2.1U.G0232200/AeUmb.PI554389.v2.4U.G0576600/AeUmb.PI554389.v2.5U.G0495800/AeUmb.PI554389.v2.2U.G0339100/AeUmb.PI554389.v2.5U.G0519600/AeUmb.PI554389.v2.7U.G0066800/AeUmb.PI554389.v2.4U.G0926200/AeUmb.PI554389.v2.6U.G0426800/AeUmb.PI554389.v2.7U.G0155400/AeUmb.PI554389.v2.1U.G0284300/AeUmb.PI554389.v2.6U.G0307300/AeUmb.PI554389.v2.4U.G0961100/AeUmb.PI5…	41	0.732143
CC	GO:0005743	mitochondrial inner membrane	23	0.579056	1.75515	0.000548741	0.00478902	0.00252804	2317	tags=87%, list=35%, signal=57%	AeUmb.PI554389.v2.7U.G0840300/AeUmb.PI554389.v2.5U.G0353800/AeUmb.PI554389.v2.4U.G0374900/AeUmb.PI554389.v2.2U.G0229100/AeUmb.PI554389.v2.7U.G0589600/AeUmb.PI554389.v2.5U.G0776500/AeUmb.PI554389.v2.3U.G0190800/AeUmb.PI554389.v2.7U.G0988100/AeUmb.PI554389.v2.7U.G0677500/AeUmb.PI554389.v2.2U.G0030200/AeUmb.PI554389.v2.5U.G0180100/AeUmb.PI554389.v2.1U.G0436000/AeUmb.PI554389.v2.5U.G0237400/AeUmb.PI5…	20	0.869565
CC	GO:0019866	organelle inner membrane	23	0.579056	1.75515	0.000548741	0.00478902	0.00252804	2317	tags=87%, list=35%, signal=57%	AeUmb.PI554389.v2.7U.G0840300/AeUmb.PI554389.v2.5U.G0353800/AeUmb.PI554389.v2.4U.G0374900/AeUmb.PI554389.v2.2U.G0229100/AeUmb.PI554389.v2.7U.G0589600/AeUmb.PI554389.v2.5U.G0776500/AeUmb.PI554389.v2.3U.G0190800/AeUmb.PI554389.v2.7U.G0988100/AeUmb.PI554389.v2.7U.G0677500/AeUmb.PI554389.v2.2U.G0030200/AeUmb.PI554389.v2.5U.G0180100/AeUmb.PI554389.v2.1U.G0436000/AeUmb.PI554389.v2.5U.G0237400/AeUmb.PI5…	20	0.869565
BP	GO:0022613	ribonucleoprotein complex biogenesis	43	0.486711	1.598	0.000600028	0.00516947	0.00272887	2523	tags=74%, list=38%, signal=46%	AeUmb.PI554389.v2.4U.G0131200/AeUmb.PI554389.v2.6U.G0426800/AeUmb.PI554389.v2.2U.G0152200/AeUmb.PI554389.v2.3U.G0260300/AeUmb.PI554389.v2.7U.G0703400/AeUmb.PI554389.v2.1U.G0265300/AeUmb.PI554389.v2.5U.G0746700/AeUmb.PI554389.v2.6U.G0247200/AeUmb.PI554389.v2.2U.G0307600/AeUmb.PI554389.v2.2U.G0031000/AeUmb.PI554389.v2.2U.G0039500/AeUmb.PI554389.v2.7U.G0248400/AeUmb.PI554389.v2.4U.G0034300/AeUmb.PI5…	32	0.744186
BP	GO:0009308	amine metabolic process	12	0.694366	1.86033	0.000641727	0.00542389	0.00286318	1109	tags=67%, list=17%, signal=56%	AeUmb.PI554389.v2.5U.G0311900/AeUmb.PI554389.v2.6U.G0471900/AeUmb.PI554389.v2.2U.G0341400/AeUmb.PI554389.v2.5U.G0056200/AeUmb.PI554389.v2.5U.G0433000/AeUmb.PI554389.v2.7U.G0719600/AeUmb.PI554389.v2.4U.G0029000/AeUmb.PI554389.v2.4U.G0395900	8	0.666667
BP	GO:0019438	aromatic compound biosynthetic process	311	0.337434	1.26807	0.000645701	0.00542389	0.00286318	3288	tags=64%, list=50%, signal=34%	AeUmb.PI554389.v2.2U.G0140100/AeUmb.PI554389.v2.2U.G0051000/AeUmb.PI554389.v2.5U.G0607900/AeUmb.PI554389.v2.5U.G0670500/AeUmb.PI554389.v2.6U.G0151000/AeUmb.PI554389.v2.4U.G0611700/AeUmb.PI554389.v2.7U.G0397300/AeUmb.PI554389.v2.3U.G0693800/AeUmb.PI554389.v2.6U.G0138600/AeUmb.PI554389.v2.6U.G0615700/AeUmb.PI554389.v2.7U.G0179100/AeUmb.PI554389.v2.4U.G0390700/AeUmb.PI554389.v2.6U.G0611800/AeUmb.PI5…	200	0.643087
MF	GO:0004867	serine-type endopeptidase inhibitor activity	10	-0.617248	-2.06934	0.000724412	0.00553188	0.00292018	2523	tags=100%, list=38%, signal=62%	AeUmb.PI554389.v2.5U.G0475800/AeUmb.PI554389.v2.7U.G0894300/AeUmb.PI554389.v2.2U.G0837800/AeUmb.PI554389.v2.1U.G0495800/AeUmb.PI554389.v2.7U.G0527600/AeUmb.PI554389.v2.5U.G0837200/AeUmb.PI554389.v2.2U.G0048200/AeUmb.PI554389.v2.5U.G0517100/AeUmb.PI554389.v2.5U.G0792700	9	0.9
BP	GO:0006888	endoplasmic reticulum to Golgi vesicle-mediated transport	11	0.696782	1.83298	0.000685017	0.00553188	0.00292018	880	tags=73%, list=13%, signal=63%	AeUmb.PI554389.v2.5U.G0414700/AeUmb.PI554389.v2.6U.G0288300/AeUmb.PI554389.v2.4U.G0893900/AeUmb.PI554389.v2.2U.G0909400/AeUmb.PI554389.v2.6U.G0206400/AeUmb.PI554389.v2.2U.G0347700/AeUmb.PI554389.v2.5U.G0725300/AeUmb.PI554389.v2.6U.G0399000	8	0.727273
BP	GO:0006364	rRNA processing	22	0.56923	1.71359	0.00071532	0.00553188	0.00292018	2434	tags=86%, list=37%, signal=55%	AeUmb.PI554389.v2.2U.G0152200/AeUmb.PI554389.v2.3U.G0260300/AeUmb.PI554389.v2.7U.G0703400/AeUmb.PI554389.v2.1U.G0265300/AeUmb.PI554389.v2.5U.G0746700/AeUmb.PI554389.v2.7U.G0248400/AeUmb.PI554389.v2.4U.G0034300/AeUmb.PI554389.v2.6U.G0176500/AeUmb.PI554389.v2.1U.G0381900/AeUmb.PI554389.v2.2U.G0646200/AeUmb.PI554389.v2.6U.G0197500/AeUmb.PI554389.v2.6U.G0774400/AeUmb.PI554389.v2.5U.G0257100/AeUmb.PI5…	19	0.863636
BP	GO:0016072	rRNA metabolic process	22	0.56923	1.71359	0.00071532	0.00553188	0.00292018	2434	tags=86%, list=37%, signal=55%	AeUmb.PI554389.v2.2U.G0152200/AeUmb.PI554389.v2.3U.G0260300/AeUmb.PI554389.v2.7U.G0703400/AeUmb.PI554389.v2.1U.G0265300/AeUmb.PI554389.v2.5U.G0746700/AeUmb.PI554389.v2.7U.G0248400/AeUmb.PI554389.v2.4U.G0034300/AeUmb.PI554389.v2.6U.G0176500/AeUmb.PI554389.v2.1U.G0381900/AeUmb.PI554389.v2.2U.G0646200/AeUmb.PI554389.v2.6U.G0197500/AeUmb.PI554389.v2.6U.G0774400/AeUmb.PI554389.v2.5U.G0257100/AeUmb.PI5…	19	0.863636
MF	GO:0004842	ubiquitin-protein transferase activity	41	0.491958	1.60533	0.000719187	0.00553188	0.00292018	2441	tags=71%, list=37%, signal=45%	AeUmb.PI554389.v2.6U.G0251300/AeUmb.PI554389.v2.1U.G0260700/AeUmb.PI554389.v2.5U.G0795000/AeUmb.PI554389.v2.3U.G0101900/AeUmb.PI554389.v2.1U.G0215500/AeUmb.PI554389.v2.7U.G0264500/AeUmb.PI554389.v2.7U.G0480300/AeUmb.PI554389.v2.6U.G0196300/AeUmb.PI554389.v2.1U.G0284300/AeUmb.PI554389.v2.5U.G0038300/AeUmb.PI554389.v2.5U.G0527400/AeUmb.PI554389.v2.7U.G0052100/AeUmb.PI554389.v2.6U.G0585500/AeUmb.PI5…	29	0.707317
MF	GO:0016755	aminoacyltransferase activity	41	0.491958	1.60533	0.000719187	0.00553188	0.00292018	2441	tags=71%, list=37%, signal=45%	AeUmb.PI554389.v2.6U.G0251300/AeUmb.PI554389.v2.1U.G0260700/AeUmb.PI554389.v2.5U.G0795000/AeUmb.PI554389.v2.3U.G0101900/AeUmb.PI554389.v2.1U.G0215500/AeUmb.PI554389.v2.7U.G0264500/AeUmb.PI554389.v2.7U.G0480300/AeUmb.PI554389.v2.6U.G0196300/AeUmb.PI554389.v2.1U.G0284300/AeUmb.PI554389.v2.5U.G0038300/AeUmb.PI554389.v2.5U.G0527400/AeUmb.PI554389.v2.7U.G0052100/AeUmb.PI554389.v2.6U.G0585500/AeUmb.PI5…	29	0.707317
MF	GO:0019787	ubiquitin-like protein transferase activity	41	0.491958	1.60533	0.000719187	0.00553188	0.00292018	2441	tags=71%, list=37%, signal=45%	AeUmb.PI554389.v2.6U.G0251300/AeUmb.PI554389.v2.1U.G0260700/AeUmb.PI554389.v2.5U.G0795000/AeUmb.PI554389.v2.3U.G0101900/AeUmb.PI554389.v2.1U.G0215500/AeUmb.PI554389.v2.7U.G0264500/AeUmb.PI554389.v2.7U.G0480300/AeUmb.PI554389.v2.6U.G0196300/AeUmb.PI554389.v2.1U.G0284300/AeUmb.PI554389.v2.5U.G0038300/AeUmb.PI554389.v2.5U.G0527400/AeUmb.PI554389.v2.7U.G0052100/AeUmb.PI554389.v2.6U.G0585500/AeUmb.PI5…	29	0.707317
MF	GO:0008270	zinc ion binding	164	0.371763	1.35848	0.000709813	0.00553188	0.00292018	2503	tags=49%, list=38%, signal=31%	AeUmb.PI554389.v2.5U.G0670500/AeUmb.PI554389.v2.7U.G0646300/AeUmb.PI554389.v2.4U.G0766700/AeUmb.PI554389.v2.5U.G0414700/AeUmb.PI554389.v2.1U.G0255800/AeUmb.PI554389.v2.4U.G0893900/AeUmb.PI554389.v2.6U.G0426800/AeUmb.PI554389.v2.6U.G0469300/AeUmb.PI554389.v2.5U.G0820200/AeUmb.PI554389.v2.2U.G0378600/AeUmb.PI554389.v2.4U.G0837900/AeUmb.PI554389.v2.5U.G0038300/AeUmb.PI554389.v2.4U.G0022000/AeUmb.PI5…	80	0.487805
MF	GO:0008135	translation factor activity, RNA binding	17	0.609026	1.7541	0.000825499	0.00609599	0.00321797	1924	tags=76%, list=29%, signal=54%	AeUmb.PI554389.v2.6U.G0295600/AeUmb.PI554389.v2.6U.G0246900/AeUmb.PI554389.v2.2U.G0207500/AeUmb.PI554389.v2.5U.G0444300/AeUmb.PI554389.v2.7U.G0874300/AeUmb.PI554389.v2.2U.G0144700/AeUmb.PI554389.v2.2U.G0666500/AeUmb.PI554389.v2.5U.G0747800/AeUmb.PI554389.v2.4U.G0657800/AeUmb.PI554389.v2.6U.G0678600/AeUmb.PI554389.v2.4U.G0505000/AeUmb.PI554389.v2.7U.G0081800/AeUmb.PI554389.v2.5U.G0706300	13	0.764706
MF	GO:0045182	translation regulator activity	17	0.609026	1.7541	0.000825499	0.00609599	0.00321797	1924	tags=76%, list=29%, signal=54%	AeUmb.PI554389.v2.6U.G0295600/AeUmb.PI554389.v2.6U.G0246900/AeUmb.PI554389.v2.2U.G0207500/AeUmb.PI554389.v2.5U.G0444300/AeUmb.PI554389.v2.7U.G0874300/AeUmb.PI554389.v2.2U.G0144700/AeUmb.PI554389.v2.2U.G0666500/AeUmb.PI554389.v2.5U.G0747800/AeUmb.PI554389.v2.4U.G0657800/AeUmb.PI554389.v2.6U.G0678600/AeUmb.PI554389.v2.4U.G0505000/AeUmb.PI554389.v2.7U.G0081800/AeUmb.PI554389.v2.5U.G0706300	13	0.764706
MF	GO:0090079	translation regulator activity, nucleic acid binding	17	0.609026	1.7541	0.000825499	0.00609599	0.00321797	1924	tags=76%, list=29%, signal=54%	AeUmb.PI554389.v2.6U.G0295600/AeUmb.PI554389.v2.6U.G0246900/AeUmb.PI554389.v2.2U.G0207500/AeUmb.PI554389.v2.5U.G0444300/AeUmb.PI554389.v2.7U.G0874300/AeUmb.PI554389.v2.2U.G0144700/AeUmb.PI554389.v2.2U.G0666500/AeUmb.PI554389.v2.5U.G0747800/AeUmb.PI554389.v2.4U.G0657800/AeUmb.PI554389.v2.6U.G0678600/AeUmb.PI554389.v2.4U.G0505000/AeUmb.PI554389.v2.7U.G0081800/AeUmb.PI554389.v2.5U.G0706300	13	0.764706
BP	GO:0051179	localization	317	0.337431	1.26898	0.000865511	0.006322	0.00333727	2495	tags=51%, list=38%, signal=33%	AeUmb.PI554389.v2.7U.G0273700/AeUmb.PI554389.v2.2U.G0058700/AeUmb.PI554389.v2.7U.G0840300/AeUmb.PI554389.v2.4U.G0145000/AeUmb.PI554389.v2.3U.G0016100/AeUmb.PI554389.v2.3U.G0195000/AeUmb.PI554389.v2.6U.G0436400/AeUmb.PI554389.v2.4U.G0060400/AeUmb.PI554389.v2.6U.G0149900/AeUmb.PI554389.v2.7U.G0070300/AeUmb.PI554389.v2.4U.G0163900/AeUmb.PI554389.v2.3U.G0018900/AeUmb.PI554389.v2.5U.G0414700/AeUmb.PI5…	162	0.511041
BP	GO:0072521	purine-containing compound metabolic process	44	0.479617	1.57969	0.000884006	0.00638765	0.00337193	3013	tags=84%, list=46%, signal=46%	AeUmb.PI554389.v2.7U.G0273700/AeUmb.PI554389.v2.5U.G0607900/AeUmb.PI554389.v2.1U.G0223100/AeUmb.PI554389.v2.2U.G0222600/AeUmb.PI554389.v2.6U.G0611800/AeUmb.PI554389.v2.3U.G0001100/AeUmb.PI554389.v2.3U.G0046300/AeUmb.PI554389.v2.7U.G0532800/AeUmb.PI554389.v2.4U.G0248600/AeUmb.PI554389.v2.4U.G0915500/AeUmb.PI554389.v2.5U.G0707900/AeUmb.PI554389.v2.3U.G0190800/AeUmb.PI554389.v2.7U.G0303200/AeUmb.PI5…	37	0.840909
CC	GO:0070469	respirasome	14	0.648879	1.79729	0.000895137	0.00639928	0.00337807	2317	tags=100%, list=35%, signal=65%	AeUmb.PI554389.v2.5U.G0353800/AeUmb.PI554389.v2.4U.G0374900/AeUmb.PI554389.v2.7U.G0589600/AeUmb.PI554389.v2.5U.G0776500/AeUmb.PI554389.v2.7U.G0677500/AeUmb.PI554389.v2.2U.G0030200/AeUmb.PI554389.v2.5U.G0180100/AeUmb.PI554389.v2.2U.G0057300/AeUmb.PI554389.v2.1U.G0436000/AeUmb.PI554389.v2.5U.G0237400/AeUmb.PI554389.v2.5U.G0692000/AeUmb.PI554389.v2.4U.G0932400/AeUmb.PI554389.v2.1U.G0423600/AeUmb.PI5…	14	1
BP	GO:0071702	organic substance transport	93	0.407991	1.43828	0.000929623	0.00657586	0.00347128	2383	tags=59%, list=36%, signal=38%	AeUmb.PI554389.v2.2U.G0058700/AeUmb.PI554389.v2.7U.G0840300/AeUmb.PI554389.v2.3U.G0016100/AeUmb.PI554389.v2.5U.G0414700/AeUmb.PI554389.v2.4U.G0849400/AeUmb.PI554389.v2.2U.G0196900/AeUmb.PI554389.v2.6U.G0537000/AeUmb.PI554389.v2.6U.G0443700/AeUmb.PI554389.v2.7U.G0025700/AeUmb.PI554389.v2.4U.G0893900/AeUmb.PI554389.v2.6U.G0195800/AeUmb.PI554389.v2.2U.G0894200/AeUmb.PI554389.v2.6U.G0239900/AeUmb.PI5…	55	0.591398
BP	GO:0006605	protein targeting	13	0.648791	1.76946	0.000988248	0.00677656	0.00357722	2112	tags=92%, list=32%, signal=63%	AeUmb.PI554389.v2.3U.G0661200/AeUmb.PI554389.v2.2U.G0229100/AeUmb.PI554389.v2.7U.G0988100/AeUmb.PI554389.v2.2U.G0513100/AeUmb.PI554389.v2.6U.G0361500/AeUmb.PI554389.v2.2U.G0367900/AeUmb.PI554389.v2.5U.G0403800/AeUmb.PI554389.v2.4U.G0481100/AeUmb.PI554389.v2.7U.G0240300/AeUmb.PI554389.v2.3U.G0207200/AeUmb.PI554389.v2.1U.G0299400/AeUmb.PI554389.v2.6U.G0295400	12	0.923077
CC	GO:0005746	mitochondrial respirasome	13	0.64878	1.76943	0.000988248	0.00677656	0.00357722	2317	tags=100%, list=35%, signal=65%	AeUmb.PI554389.v2.5U.G0353800/AeUmb.PI554389.v2.4U.G0374900/AeUmb.PI554389.v2.7U.G0589600/AeUmb.PI554389.v2.5U.G0776500/AeUmb.PI554389.v2.7U.G0677500/AeUmb.PI554389.v2.2U.G0030200/AeUmb.PI554389.v2.5U.G0180100/AeUmb.PI554389.v2.1U.G0436000/AeUmb.PI554389.v2.5U.G0237400/AeUmb.PI554389.v2.5U.G0692000/AeUmb.PI554389.v2.4U.G0932400/AeUmb.PI554389.v2.1U.G0423600/AeUmb.PI554389.v2.7U.G0143200	13	1
CC	GO:0098803	respiratory chain complex	13	0.64878	1.76943	0.000988248	0.00677656	0.00357722	2317	tags=100%, list=35%, signal=65%	AeUmb.PI554389.v2.5U.G0353800/AeUmb.PI554389.v2.4U.G0374900/AeUmb.PI554389.v2.7U.G0589600/AeUmb.PI554389.v2.5U.G0776500/AeUmb.PI554389.v2.7U.G0677500/AeUmb.PI554389.v2.2U.G0030200/AeUmb.PI554389.v2.2U.G0057300/AeUmb.PI554389.v2.1U.G0436000/AeUmb.PI554389.v2.5U.G0237400/AeUmb.PI554389.v2.5U.G0692000/AeUmb.PI554389.v2.4U.G0932400/AeUmb.PI554389.v2.1U.G0423600/AeUmb.PI554389.v2.7U.G0143200	13	1
BP	GO:0043603	amide metabolic process	138	0.375021	1.35735	0.00104007	0.00705987	0.00372678	3106	tags=69%, list=47%, signal=37%	AeUmb.PI554389.v2.3U.G0101900/AeUmb.PI554389.v2.6U.G0611800/AeUmb.PI554389.v2.6U.G0246900/AeUmb.PI554389.v2.1U.G0348700/AeUmb.PI554389.v2.2U.G0258100/AeUmb.PI554389.v2.2U.G0824800/AeUmb.PI554389.v2.1U.G0455600/AeUmb.PI554389.v2.6U.G0379800/AeUmb.PI554389.v2.2U.G0207500/AeUmb.PI554389.v2.6U.G0745300/AeUmb.PI554389.v2.5U.G0288400/AeUmb.PI554389.v2.1U.G0228200/AeUmb.PI554389.v2.7U.G0906600/AeUmb.PI5…	95	0.688406
MF	GO:0016853	isomerase activity	42	0.482281	1.57923	0.00113245	0.00761005	0.00401721	2160	tags=67%, list=33%, signal=45%	AeUmb.PI554389.v2.2U.G0138100/AeUmb.PI554389.v2.2U.G0222600/AeUmb.PI554389.v2.1U.G0436800/AeUmb.PI554389.v2.1U.G0347700/AeUmb.PI554389.v2.2U.G0564100/AeUmb.PI554389.v2.6U.G0196300/AeUmb.PI554389.v2.5U.G0745200/AeUmb.PI554389.v2.2U.G0177100/AeUmb.PI554389.v2.7U.G0344100/AeUmb.PI554389.v2.2U.G0785700/AeUmb.PI554389.v2.5U.G0313500/AeUmb.PI554389.v2.4U.G0835900/AeUmb.PI554389.v2.5U.G0271400/AeUmb.PI5…	28	0.666667
BP	GO:0051234	establishment of localization	315	0.337631	1.26943	0.00115052	0.00765492	0.0040409	2495	tags=51%, list=38%, signal=33%	AeUmb.PI554389.v2.7U.G0273700/AeUmb.PI554389.v2.2U.G0058700/AeUmb.PI554389.v2.7U.G0840300/AeUmb.PI554389.v2.4U.G0145000/AeUmb.PI554389.v2.3U.G0016100/AeUmb.PI554389.v2.3U.G0195000/AeUmb.PI554389.v2.6U.G0436400/AeUmb.PI554389.v2.4U.G0060400/AeUmb.PI554389.v2.6U.G0149900/AeUmb.PI554389.v2.7U.G0070300/AeUmb.PI554389.v2.4U.G0163900/AeUmb.PI554389.v2.3U.G0018900/AeUmb.PI554389.v2.5U.G0414700/AeUmb.PI5…	161	0.511111
[truncated: 157 more rows]
