# Supplementary material for: Improved reannotations of Aegilops umbellulata (PI 554389) genome and transcriptomics data provide candidates for leaf rust resistance for wheat improvement
Source: Sci Rep. 2025 Dec 29;15:44930. doi: 10.1038/s41598-025-29241-6 (PMC12749518; doi:10.1038/s41598-025-29241-6)
Supplement: Supplementary file 2 — Supplementary Material 2 [file 41598_2025_29241_MOESM2_ESM.xlsx]

## Sheet: Title Sheet
Table S12: The list of differentially expressed genes (DEGs) found in this study.
Sheet names
U890_vs_U170
U89I6_vs_U17I6
U89I24_vs_U17I24
U89I72_vs_U17I72
U89M6_vs_U17M6
U89M24_vs_U17M24
U89M72_vs_U17M72
U17I6_vs_U17M6
U17I24_vs_U17M24
U17I72_vs_U17M72
U89I6_vs_U89M6
U89I24_vs_U89M24
U89I72_vs_U89M72

## Sheet: U890_vs_U170
Gene	baseMean	log2FoldChange	lfcSE	stat	pvalue	padj	interpro_description	go
AeUmb.PI554389.v2.5U.G0000100	335.745	0.3963	0.166104	2.38585	0.0170396	0.0466023
AeUmb.PI554389.v2.5U.G0000200	966.704	-0.466236	0.174584	-2.67056	0.00757257	0.0235316	Protein kinase domain, Protein kinase-like domain superfamily, Serine/threonine-protein PRP4, Serine/threonine-protein kinase, active site, catalytic domain	GO:0004672, GO:0004674, GO:0005524, GO:0006468, GO:0045292
AeUmb.PI554389.v2.5U.G0001100	11.5569	-5.20012	1.51871	-3.42405	0.000616964	0.00265624	Microtubule-associated protein 70	GO:0007010, GO:0008017
AeUmb.PI554389.v2.5U.G0001200	28.1328	8.17306	1.24635	6.55762	5.46737e-11	8.79263e-10
AeUmb.PI554389.v2.5U.G0001300	78.0138	9.19781	1.20944	7.605	2.84909e-14	7.37346e-13
AeUmb.PI554389.v2.5U.G0001600	1555.27	0.463095	0.115024	4.02606	5.67192e-05	0.000315475	ATP binding site, Protein kinase, Protein kinase domain, Protein kinase-like domain superfamily, Serine/threonine-protein kinase, active site	GO:0004672, GO:0005524, GO:0006468
AeUmb.PI554389.v2.5U.G0001700	1908.89	1.06248	0.180361	5.89086	3.84186e-09	4.62279e-08
AeUmb.PI554389.v2.5U.G0002700	25.9326	-5.06874	1.13914	-4.44963	8.60199e-06	5.7136e-05
AeUmb.PI554389.v2.5U.G0004400	31.4782	-6.9691	1.74272	-3.99897	6.36196e-05	0.000349989	ATP binding site, Bulb-type lectin domain, Bulb-type lectin domain superfamily, PAN/Apple domain, Protein kinase, Protein kinase domain, Protein kinase-like domain superfamily, Serine/threonine-protein kinase, active site	GO:0004672, GO:0005524, GO:0006468
AeUmb.PI554389.v2.5U.G0004700	28.4011	6.9915	1.52998	4.56967	4.88491e-06	3.42227e-05	MFS transporter superfamily, Major facilitator, Major facilitator superfamily domain, Sugar transport protein STP/MST-like, Sugar transport protein STP/Polyol transporter PLT, Sugar transporter, Sugar/inositol transporter, conserved site, plant, sugar transporter-like	GO:0015144, GO:0015145, GO:0015749, GO:0016020, GO:0022857, GO:0055085
AeUmb.PI554389.v2.5U.G0005300	20.5357	-18.2463	4.50719	-4.04826	5.1599e-05	0.000290232
AeUmb.PI554389.v2.5U.G0005400	15317.6	0.719998	0.132892	5.4179	6.0302e-08	5.97716e-07	Carotenoid oxygenase	GO:0016702
AeUmb.PI554389.v2.5U.G0006200	6.52894	5.96329	1.8859	3.16204	0.00156669	0.00601616
AeUmb.PI554389.v2.5U.G0006800	6950.01	-0.557911	0.120949	-4.61278	3.97314e-06	2.82157e-05	C-terminal, HAD superfamily, HAD-like superfamily, HAD-superfamily hydrolase, NTF2-like domain superfamily, Sucrose phosphatase, Sucrose phosphatase-like domain, Sucrose-phosphatase, plant/cyanobacteria, subfamily IIB	GO:0000287, GO:0005986, GO:0050307
AeUmb.PI554389.v2.5U.G0007300	6.0448	5.46867	1.46593	3.73051	0.000191095	0.000941511	Leucine-rich repeat, Leucine-rich repeat domain superfamily, U2 small nuclear ribonucleoprotein A'	GO:0000398, GO:0005515, GO:0030620
AeUmb.PI554389.v2.5U.G0008200	76.5065	1.1333	0.36891	3.07202	0.00212614	0.00786355
AeUmb.PI554389.v2.5U.G0008700	49.7392	4.95382	1.30679	3.79083	0.000150147	0.000758569	AAA+ ATPase domain, AAA-type, AAA-type ATPase, ATPase, N-terminal domain, P-loop containing nucleoside triphosphate hydrolase, conserved site, core	GO:0005524, GO:0016887
AeUmb.PI554389.v2.5U.G0009300	243.568	10.5112	1.24132	8.46778	2.50116e-17	9.97888e-16
AeUmb.PI554389.v2.5U.G0009800	98.4989	9.37275	1.19658	7.83294	4.76589e-15	1.37478e-13	F-box domain, F-box-like domain superfamily	GO:0005515
AeUmb.PI554389.v2.5U.G0012400	1088.83	-0.52653	0.158341	-3.3253	0.000883245	0.00364151
AeUmb.PI554389.v2.5U.G0012500	1226.45	0.679365	0.204554	3.3212	0.000896315	0.00368557	GTP binding domain, P-loop containing nucleoside triphosphate hydrolase	GO:0005525
AeUmb.PI554389.v2.5U.G0012900	162.746	2.10849	0.2959	7.12568	1.03567e-12	2.15869e-11	PA clan, PDZ domain, PDZ domain 6, PDZ superfamily, Peptidase M50, Peptidase S1, chymotrypsin-like fold	GO:0005515, GO:0006508
AeUmb.PI554389.v2.5U.G0013600	112.092	-0.629303	0.248003	-2.53748	0.0111653	0.0327299	PA clan, PDZ domain 6, PDZ superfamily, Peptidase S1	GO:0005515
AeUmb.PI554389.v2.5U.G0013700	57.4009	-2.12792	0.678594	-3.13578	0.00171396	0.00651214	PA clan, PDZ domain, PDZ domain 6, PDZ superfamily, Peptidase M50, Peptidase S1, chymotrypsin-like fold	GO:0005515, GO:0006508
AeUmb.PI554389.v2.5U.G0013800	13.7979	-5.77853	1.68677	-3.4258	0.000613001	0.00264144	Protein kinase domain, Protein kinase-like domain superfamily, Receptor-like kinase WAK-like, Serine-threonine/tyrosine-protein kinase, Serine/threonine-protein kinase, active site, catalytic domain	GO:0004672, GO:0005524, GO:0006468, GO:0007166
AeUmb.PI554389.v2.5U.G0014100	106.003	-3.65566	0.515254	-7.09486	1.29486e-12	2.66217e-11	ATP binding site, Immunoglobulin-like fold, Major sperm protein (MSP) domain, PapD-like superfamily, Protein kinase, Protein kinase domain, Protein kinase-like domain superfamily, Serine/threonine-protein kinase, active site	GO:0004672, GO:0005524, GO:0006468
AeUmb.PI554389.v2.5U.G0014700	10.3748	7.30175	1.43461	5.08973	3.58582e-07	3.10846e-06	ATP binding site, Immunoglobulin-like fold, Major sperm protein (MSP) domain, PapD-like superfamily, Protein kinase, Protein kinase domain, Protein kinase-like domain superfamily, Serine/threonine-protein kinase, active site	GO:0004672, GO:0005524, GO:0006468
AeUmb.PI554389.v2.5U.G0014900	32.0271	8.2578	1.22087	6.76387	1.34351e-11	2.37568e-10	ATP binding site, Protein kinase, Protein kinase domain, Protein kinase-like domain superfamily, Serine-threonine/tyrosine-protein kinase, Serine/threonine-protein kinase, active site, catalytic domain	GO:0004672, GO:0005524, GO:0006468
AeUmb.PI554389.v2.5U.G0015600	31.1294	7.78944	1.23284	6.31828	2.64482e-10	3.84774e-09	ATP binding site, Protein kinase, Protein kinase domain, Protein kinase-like domain superfamily, Serine-threonine/tyrosine-protein kinase, Serine/threonine-protein kinase, active site, catalytic domain	GO:0004672, GO:0005524, GO:0006468
AeUmb.PI554389.v2.5U.G0016200	6.33454	6.31722	1.7126	3.68868	0.000225421	0.00109193
AeUmb.PI554389.v2.5U.G0018300	2495.25	-0.931716	0.138714	-6.7168	1.85755e-11	3.20398e-10	Homeobox KN domain, Homeobox domain, Homeobox-like domain superfamily, POX domain	GO:0003677, GO:0006355
AeUmb.PI554389.v2.5U.G0019100	7.74692	-6.97818	1.94448	-3.58871	0.000332317	0.00153208	PA clan, PDZ domain 6, PDZ superfamily, Peptidase S1, Peptidase S1C	GO:0004252, GO:0005515, GO:0006508
AeUmb.PI554389.v2.5U.G0019800	45.9254	-5.87492	1.02101	-5.75402	8.71457e-09	9.89464e-08	Cytochrome P450, Cytochrome P450 superfamily, E-class, conserved site, group I	GO:0004497, GO:0005506, GO:0016705, GO:0020037
AeUmb.PI554389.v2.5U.G0020100	86.3741	-10.2817	1.51199	-6.80012	1.0453e-11	1.87805e-10	Cytochrome P450, Cytochrome P450 superfamily, E-class, conserved site, group I	GO:0004497, GO:0005506, GO:0016705, GO:0020037
AeUmb.PI554389.v2.5U.G0020200	522.507	-5.37215	0.446223	-12.0392	2.21181e-33	4.54429e-31	Cytochrome P450, Cytochrome P450 superfamily, E-class, conserved site, group I	GO:0004497, GO:0005506, GO:0016705, GO:0020037
AeUmb.PI554389.v2.5U.G0020300	17.8047	-3.79433	0.936124	-4.05323	5.05146e-05	0.000284953	Ankyrin repeat, Ankyrin repeat-containing domain superfamily	GO:0005515
AeUmb.PI554389.v2.5U.G0020500	895.882	-4.58446	0.249165	-18.3993	1.33048e-75	2.36371e-72	Ankyrin repeat, Ankyrin repeat-containing domain superfamily, Tetratricopeptide repeat, Tetratricopeptide repeat 2, Tetratricopeptide-like helical domain superfamily	GO:0005515
AeUmb.PI554389.v2.5U.G0020900	14.6608	2.71965	1.14437	2.37656	0.0174751	0.0475825	Ankyrin repeat, Ankyrin repeat-containing domain superfamily, Tetratricopeptide repeat, Tetratricopeptide-like helical domain superfamily	GO:0005515
AeUmb.PI554389.v2.5U.G0021200	161.451	1.13121	0.312794	3.61646	0.000298658	0.00139846
AeUmb.PI554389.v2.5U.G0022100	12.4661	-7.29392	1.69423	-4.30517	1.66861e-05	0.00010462
AeUmb.PI554389.v2.5U.G0022800	30.2824	-2.78889	0.716232	-3.89383	9.86723e-05	0.000520269
AeUmb.PI554389.v2.5U.G0023600	153.195	2.75753	0.96934	2.84475	0.00444458	0.01492
AeUmb.PI554389.v2.5U.G0024100	1120.45	0.566447	0.111716	5.07043	3.96922e-07	3.41048e-06	Peroxin-3	GO:0005778, GO:0007031
AeUmb.PI554389.v2.5U.G0024400	346.242	-1.20363	0.387307	-3.1077	0.00188552	0.00706355
AeUmb.PI554389.v2.5U.G0024900	11.1335	5.62273	1.5059	3.7338	0.000188613	0.0009308
AeUmb.PI554389.v2.5U.G0025100	49.0336	9.40325	1.28439	7.32119	2.45774e-13	5.52297e-12
AeUmb.PI554389.v2.5U.G0026100	20.4571	-7.38873	1.59033	-4.64605	3.38353e-06	2.43831e-05
AeUmb.PI554389.v2.5U.G0026200	66.6712	9.18956	1.24567	7.3772	1.61659e-13	3.75571e-12	Disease resistance protein, Leucine-rich repeat domain superfamily, NB-ARC, P-loop containing nucleoside triphosphate hydrolase, Winged helix-like DNA-binding domain superfamily, plants	GO:0006952, GO:0043531
AeUmb.PI554389.v2.5U.G0026300	31.8283	8.48949	1.25325	6.77398	1.25289e-11	2.22717e-10	Apoptotic protease-activating factors, Disease resistance protein, Leucine-rich repeat domain superfamily, NB-ARC, P-loop containing nucleoside triphosphate hydrolase, Winged helix-like DNA-binding domain superfamily, helical domain, plants	GO:0006952, GO:0043531
AeUmb.PI554389.v2.5U.G0026500	289.53	2.61939	0.356861	7.34007	2.13475e-13	4.8513e-12
AeUmb.PI554389.v2.5U.G0026600	1098.01	1.20913	0.171322	7.05767	1.69316e-12	3.42053e-11
AeUmb.PI554389.v2.5U.G0027100	3085.07	-0.76567	0.153934	-4.974	6.55836e-07	5.43417e-06	7TM region, CSC1/OSCA1-like, Calcium permeable stress-gated cation channel 1-like, N-terminal transmembrane domain, cytosolic domain	GO:0005227, GO:0016020
AeUmb.PI554389.v2.5U.G0027300	11.8852	-6.2522	2.17453	-2.87519	0.00403779	0.0137437
AeUmb.PI554389.v2.5U.G0028400	12.0334	-6.52025	1.86338	-3.49915	0.000466739	0.00206935	Aldolase-type TIM barrel, Alpha galactosidase, C-terminal beta sandwich domain, Glycoside hydrolase, Glycoside hydrolase family 27/36, Glycoside hydrolase superfamily, Glycosyl hydrolase, all-beta, conserved site, family 27	GO:0004553, GO:0005975
AeUmb.PI554389.v2.5U.G0029300	3160.8	0.978196	0.221857	4.40914	1.03784e-05	6.7846e-05	ATP binding site, Leucine-rich repeat, Leucine-rich repeat domain superfamily, Leucine-rich repeat-containing N-terminal, Protein kinase, Protein kinase domain, Protein kinase-like domain superfamily, Serine/threonine-protein kinase, active site, plant-type	GO:0004672, GO:0005515, GO:0005524, GO:0006468
AeUmb.PI554389.v2.5U.G0030100	552.794	-0.333495	0.12053	-2.76692	0.00565891	0.0183341	C-terminal, C-terminal domain superfamily, N-terminal, Neutral ceramidase, Neutral/alkaline non-lysosomal ceramidase, Neutral/alkaline nonlysosomal ceramidase	GO:0017040, GO:0046514
AeUmb.PI554389.v2.5U.G0030700	16.2027	-4.90369	1.46053	-3.35746	0.00078661	0.00328728
AeUmb.PI554389.v2.5U.G0030800	25.8962	2.67582	0.577957	4.6298	3.66027e-06	2.61837e-05
AeUmb.PI554389.v2.5U.G0031700	76.0479	-2.71079	1.05306	-2.5742	0.0100472	0.0299167	Helix-loop-helix DNA-binding domain superfamily, Myc-type, basic helix-loop-helix (bHLH) domain	GO:0046983
AeUmb.PI554389.v2.5U.G0032200	17.1622	2.33391	0.96621	2.41553	0.0157125	0.0435205
AeUmb.PI554389.v2.5U.G0037100	121.983	-0.744079	0.249632	-2.98071	0.00287581	0.0102424	Circularly permuted (CP)-type guanine nucleotide-binding (G) domain, GTP binding domain, GTP-binding protein, P-loop containing nucleoside triphosphate hydrolase, orthogonal bundle domain superfamily	GO:0005525
AeUmb.PI554389.v2.5U.G0037200	3.53078	5.10314	1.83558	2.78012	0.00543385	0.0177247
AeUmb.PI554389.v2.5U.G0037400	6.44078	-7.04716	1.99671	-3.5294	0.000416509	0.00187445	DNA helicase Pif1-like, Helitron helicase-like domain, P-loop containing nucleoside triphosphate hydrolase	GO:0000723, GO:0003678, GO:0006281
AeUmb.PI554389.v2.5U.G0038100	56.6657	8.25458	1.22256	6.7519	1.45921e-11	2.56228e-10
AeUmb.PI554389.v2.5U.G0038200	19.7521	2.27172	0.572466	3.96831	7.23855e-05	0.000392564
AeUmb.PI554389.v2.5U.G0038400	311.403	0.61899	0.213445	2.9	0.00373159	0.0128157
AeUmb.PI554389.v2.5U.G0038800	99.3026	4.78088	0.549306	8.70349	3.21826e-18	1.42938e-16
AeUmb.PI554389.v2.5U.G0038900	290.421	1.36269	0.192077	7.09448	1.29837e-12	2.66759e-11
AeUmb.PI554389.v2.5U.G0039000	24.7226	7.26152	1.32668	5.47346	4.41335e-08	4.46689e-07
AeUmb.PI554389.v2.5U.G0039100	50.1159	8.8613	1.21319	7.30413	2.79069e-13	6.24793e-12	CRIB domain, CRIB domain superfamily, Rho GTPase-activating protein 1-5	GO:0005096
AeUmb.PI554389.v2.5U.G0039500	28.255	-7.68218	1.55169	-4.95085	7.38896e-07	6.04937e-06
AeUmb.PI554389.v2.5U.G0040400	203.185	4.54986	0.461677	9.85507	6.51704e-23	5.07288e-21	AAA+ ATPase domain, ABC transporter family G domain, ABC transporter-like, ABC-2 type transporter, ABC-transporter, ATP-binding cassette transporter, ATP-binding domain, N-terminal domain, P-loop containing nucleoside triphosphate hydrolase, PDR-like subfamily G, Plant PDR ABC transporter associated, domain 1, domain 2, transmembrane domain	GO:0005524, GO:0016020, GO:0016887, GO:0140359
AeUmb.PI554389.v2.5U.G0040700	57.1672	1.69496	0.511553	3.31336	0.000921833	0.00377764
AeUmb.PI554389.v2.5U.G0041200	1910.97	5.16463	0.605759	8.52588	1.51657e-17	6.24026e-16	C-terminal domain, Isoprenoid synthase domain superfamily, N-terminal domain, N-terminal domain superfamily, Terpene cyclase-like 1, Terpene cyclases, Terpene synthase, Terpenoid cyclases/protein prenyltransferase alpha-alpha toroid, class 1, metal-binding domain, plant	GO:0000287, GO:0010333, GO:0016102, GO:0016829
AeUmb.PI554389.v2.5U.G0042100	9492.73	0.679441	0.226218	3.00347	0.00266918	0.00959697
AeUmb.PI554389.v2.5U.G0042200	26.1799	-8.30506	1.60829	-5.16389	2.41869e-07	2.15421e-06
AeUmb.PI554389.v2.5U.G0042300	680.292	6.47769	1.18246	5.47816	4.29774e-08	4.3601e-07
AeUmb.PI554389.v2.5U.G0043400	25.2606	7.76045	1.38157	5.61714	1.94144e-08	2.07632e-07
AeUmb.PI554389.v2.5U.G0043700	16.9531	-7.496	1.5394	-4.86942	1.11924e-06	8.86291e-06	PLC-like phosphodiesterase, TIM beta/alpha-barrel domain superfamily	GO:0006629, GO:0008081
AeUmb.PI554389.v2.5U.G0044300	132.891	2.51617	0.366848	6.8589	6.9392e-12	1.28339e-10	PLC-like phosphodiesterase, TIM beta/alpha-barrel domain superfamily	GO:0006629, GO:0008081
AeUmb.PI554389.v2.5U.G0046200	5.29885	-5.96869	2.20701	-2.70443	0.00684221	0.0215618	Autonomous transposable element EN-1 mosaic protein	GO:0032196
AeUmb.PI554389.v2.5U.G0046300	16.4344	-3.41463	1.12755	-3.02836	0.00245883	0.00892845	Armadillo-like helical, Armadillo-type fold, HEAT, Splicing factor 3B subunit 1, Splicing factor 3B subunit 1-like, TOG domain, type 2	GO:0000245, GO:0003729
AeUmb.PI554389.v2.5U.G0048900	19.8053	8.07865	1.30169	6.20629	5.42496e-10	7.50062e-09
AeUmb.PI554389.v2.5U.G0049600	42.136	3.12713	0.53027	5.89724	3.69631e-09	4.46722e-08
AeUmb.PI554389.v2.5U.G0049800	4.76963	5.90623	1.61343	3.66067	0.000251558	0.00120287
AeUmb.PI554389.v2.5U.G0050000	40.8614	2.96102	0.495456	5.97635	2.28187e-09	2.85135e-08
AeUmb.PI554389.v2.5U.G0051100	238.377	0.531175	0.196637	2.7013	0.00690689	0.0217362	GATA-type, NHR/GATA-type, Zinc finger	GO:0006355, GO:0008270, GO:0043565
AeUmb.PI554389.v2.5U.G0051200	22731.3	-0.691649	0.225361	-3.06908	0.00214722	0.00792887	Cysteine synthase, Cysteine synthase CysK, Cysteine synthase/cystathionine beta-synthase, PALP domain, PALP domain superfamily, Tryptophan synthase beta chain-like, pyridoxal-phosphate attachment site	GO:0004124, GO:0006535
AeUmb.PI554389.v2.5U.G0051900	14.7055	7.07327	1.27091	5.56551	2.6139e-08	2.74878e-07
AeUmb.PI554389.v2.5U.G0052600	154.542	-1.81019	0.249302	-7.26105	3.84087e-13	8.39985e-12	Domain unknown function DUF295, F-box domain, F-box-like domain superfamily	GO:0005515
AeUmb.PI554389.v2.5U.G0053000	4.8432	4.58872	1.73227	2.64896	0.00807407	0.0248688	Armadillo-type fold, MT-associated protein TORTIFOLIA1/SPIRAL2-like	GO:0005874, GO:0008017
AeUmb.PI554389.v2.5U.G0053400	115.222	3.34494	0.637182	5.24958	1.52445e-07	1.41198e-06	Domain unknown function DUF295, F-box domain, F-box-like domain superfamily	GO:0005515
AeUmb.PI554389.v2.5U.G0053700	34.9347	5.50614	0.955502	5.76256	8.28477e-09	9.43502e-08	Domain unknown function DUF295, F-box domain, F-box-like domain superfamily	GO:0005515
AeUmb.PI554389.v2.5U.G0053800	8.73407	4.15435	1.24232	3.34401	0.000825759	0.00343331
AeUmb.PI554389.v2.5U.G0055700	21.9979	2.01246	0.735661	2.73559	0.00622693	0.0199075	NCX, Sodium/calcium exchanger membrane region, central ion-binding domain superfamily	GO:0016020, GO:0055085
AeUmb.PI554389.v2.5U.G0055900	41.9395	-1.41984	0.593023	-2.39424	0.0166548	0.0457114	Leucine-rich repeat, Leucine-rich repeat domain superfamily, Leucine-rich repeat-containing N-terminal, plant-type, typical subtype	GO:0005515
AeUmb.PI554389.v2.5U.G0056100	33.4457	4.97059	0.838908	5.92507	3.12165e-09	3.82474e-08
AeUmb.PI554389.v2.5U.G0056200	1626.07	-0.578334	0.132749	-4.3566	1.321e-05	8.45991e-05	Carbon-nitrogen hydrolase, Carbon-nitrogen hydrolase superfamily, N-carbamoylputrescine amidase	GO:0006596, GO:0006807, GO:0050126
AeUmb.PI554389.v2.5U.G0056300	9.61501	2.76726	1.04391	2.65086	0.00802862	0.024753
AeUmb.PI554389.v2.5U.G0056600	42523	-0.534324	0.186994	-2.85744	0.00427078	0.0144102	C-terminal/archaeal, Cobalamin-independent methionine synthase, Cobalamin-independent methionine synthase MetE, N-terminal, UROD/MetE-like superfamily	GO:0003871, GO:0008270, GO:0008652, GO:0009086
AeUmb.PI554389.v2.5U.G0056900	620.943	0.789754	0.128226	6.1591	7.31615e-10	9.88203e-09	C-terminal domain superfamily, Folylpolyglutamate synthetase, Mur ligase, Mur-like, catalytic domain superfamily, central, conserved site	GO:0004326, GO:0005524, GO:0009058, GO:0009396, GO:0016881
AeUmb.PI554389.v2.5U.G0057000	33.4481	8.23863	1.23685	6.66098	2.72012e-11	4.58444e-10
AeUmb.PI554389.v2.5U.G0057100	138.344	-0.996382	0.303884	-3.27882	0.00104242	0.00421122	Cysteine oxygenase/2-aminoethanethiol dioxygenase, RmlC-like cupin domain superfamily, RmlC-like jelly roll fold	GO:0016702
AeUmb.PI554389.v2.5U.G0057400	28.0586	7.97787	1.24477	6.40911	1.46372e-10	2.19937e-09
AeUmb.PI554389.v2.5U.G0057500	36.6306	8.22729	1.21739	6.75813	1.39788e-11	2.46317e-10
AeUmb.PI554389.v2.5U.G0057700	521.075	12.2848	1.18821	10.3389	4.69996e-25	4.79554e-23
AeUmb.PI554389.v2.5U.G0057900	44.8326	-9.35792	1.50563	-6.21529	5.12309e-10	7.10411e-09	3'-5' exonuclease domain, Ribonuclease H superfamily, Ribonuclease H-like superfamily	GO:0003676, GO:0006139, GO:0008408
AeUmb.PI554389.v2.5U.G0058300	26.4361	-8.00421	1.49624	-5.34954	8.81787e-08	8.48684e-07
AeUmb.PI554389.v2.5U.G0058600	28.5446	4.51375	1.01936	4.42802	9.51019e-06	6.26859e-05
AeUmb.PI554389.v2.5U.G0058700	324.309	11.208	1.19111	9.4097	4.9754e-21	3.15687e-19
AeUmb.PI554389.v2.5U.G0058800	316.1	11.2272	1.19453	9.39886	5.51572e-21	3.48506e-19
AeUmb.PI554389.v2.5U.G0061400	413.744	-0.550557	0.195879	-2.8107	0.00494339	0.0163688	High mobility group box domain superfamily, YABBY protein	GO:0007275
AeUmb.PI554389.v2.5U.G0062100	14.9959	2.37542	0.877587	2.70677	0.00679419	0.0214329
AeUmb.PI554389.v2.5U.G0062200	58.4583	2.91271	0.452234	6.44071	1.18913e-10	1.81659e-09
AeUmb.PI554389.v2.5U.G0062300	69.2173	2.43641	0.390368	6.24131	4.33912e-10	6.10671e-09
AeUmb.PI554389.v2.5U.G0062700	121.481	1.41186	0.319775	4.41518	1.00928e-05	6.61793e-05
AeUmb.PI554389.v2.5U.G0062900	58.8032	1.99959	0.555582	3.59909	0.000319336	0.00148059
AeUmb.PI554389.v2.5U.G0063300	76.0257	6.27144	0.781444	8.02545	1.01157e-15	3.24326e-14	Apoptotic protease-activating factors, Disease resistance protein, Leucine-rich repeat domain superfamily, N-terminal, NB-ARC, P-loop containing nucleoside triphosphate hydrolase, Rx, Virus X resistance protein-like, Winged helix-like DNA-binding domain superfamily, coiled-coil domain, helical domain, plants	GO:0006952, GO:0043531
AeUmb.PI554389.v2.5U.G0063800	62.1046	-1.47252	0.471697	-3.12174	0.00179783	0.00678558	F-box associated interaction domain, F-box domain, F-box-like domain superfamily	GO:0005515
AeUmb.PI554389.v2.5U.G0064300	8.26713	5.52938	1.48852	3.7147	0.000203449	0.000996199
AeUmb.PI554389.v2.5U.G0064700	80.8666	4.2965	0.674972	6.36546	1.94707e-10	2.88686e-09	AAA-type, ATPase, P-loop containing nucleoside triphosphate hydrolase, conserved site, core	GO:0005524, GO:0016887
AeUmb.PI554389.v2.5U.G0066300	50.5053	7.18716	1.25572	5.72354	1.04325e-08	1.17044e-07	Disease resistance protein, Leucine-rich repeat domain superfamily, N-terminal, NB-ARC, P-loop containing nucleoside triphosphate hydrolase, Rx, Winged helix-like DNA-binding domain superfamily, plants	GO:0006952, GO:0043531
AeUmb.PI554389.v2.5U.G0066400	73.7181	8.8912	1.24326	7.1515	8.58356e-13	1.80153e-11	Apoptotic protease-activating factors, Disease resistance protein, Leucine-rich repeat domain superfamily, NB-ARC, P-loop containing nucleoside triphosphate hydrolase, Protein of unknown function DUF674, Winged helix-like DNA-binding domain superfamily, helical domain, plants	GO:0006952, GO:0043531
AeUmb.PI554389.v2.5U.G0066500	57.6554	9.21154	1.22395	7.52609	5.22839e-14	1.30072e-12
AeUmb.PI554389.v2.5U.G0067300	1004.4	-0.813396	0.204924	-3.96925	7.20985e-05	0.000391148	Acyl-coenzyme A thioesterase 13, HotDog domain superfamily, Phenylacetic acid degradation-related domain, Thioesterase domain	GO:0047617
AeUmb.PI554389.v2.5U.G0068200	92.7298	-0.985465	0.321666	-3.06363	0.0021867	0.00805596	CCAAT-binding factor, Nuclear transcription factor Y subunit A, conserved site	GO:0003677, GO:0003700, GO:0006355, GO:0016602
AeUmb.PI554389.v2.5U.G0068400	464.462	-0.439125	0.181239	-2.42291	0.0153967	0.0428345	Circularly permuted (CP)-type guanine nucleotide-binding (G) domain, GTP binding domain, GTP-binding protein, P-loop containing nucleoside triphosphate hydrolase, Ras GTPase GNL1-like, orthogonal bundle domain superfamily	GO:0003924, GO:0005525
AeUmb.PI554389.v2.5U.G0068800	128.527	-1.72281	0.388853	-4.43048	9.40217e-06	6.20551e-05	HMA, Heavy metal-associated domain, Heavy metal-associated domain superfamily, Heavy-metal-associated, conserved site	GO:0046872
AeUmb.PI554389.v2.5U.G0069100	202.682	-0.845806	0.261358	-3.2362	0.00121133	0.00480809	C-terminal, GTP binding domain, N-terminal helical domain, NOG, NOG1, Nucleolar GTP-binding protein 1, OBG-type guanine nucleotide-binding (G) domain, P-loop containing nucleoside triphosphate hydrolase, Rossman-fold domain	GO:0005525
AeUmb.PI554389.v2.5U.G0071800	504.201	0.712528	0.169736	4.19786	2.69451e-05	0.000161403	Eukaryotic translation initiation factor 3 subunit B, Papain-like cysteine peptidase superfamily, Translation initiation factor, WD40/YVTN repeat-like-containing domain superfamily, beta propellor-like domain	GO:0003723, GO:0003743, GO:0005515, GO:0005852, GO:0006413, GO:0031369
AeUmb.PI554389.v2.5U.G0071900	459.686	0.677888	0.20489	3.30855	0.000937816	0.00383585
AeUmb.PI554389.v2.5U.G0073100	155.968	1.00712	0.423277	2.37935	0.0173433	0.0472746	TCP, Transcription factor, Transcription factor TCP subgroup	GO:0003700
AeUmb.PI554389.v2.5U.G0073300	483.974	0.803742	0.263184	3.05391	0.00225877	0.00828709	Small ribosomal subunit protein uS10, Small ribosomal subunit protein uS10 domain, Small ribosomal subunit protein uS10 domain superfamily, eukaryotic/archaeal	GO:0003735, GO:0005840, GO:0006412, GO:0015935
AeUmb.PI554389.v2.5U.G0074300	25.6908	3.15369	0.84267	3.7425	0.000182202	0.000902848	Kinesin motor domain, Kinesin motor domain superfamily, Kinesin-like protein, P-loop containing nucleoside triphosphate hydrolase, conserved site	GO:0003777, GO:0005524, GO:0007018, GO:0008017
AeUmb.PI554389.v2.5U.G0074800	28.0202	7.77027	1.25221	6.20526	5.46075e-10	7.53429e-09
AeUmb.PI554389.v2.5U.G0076200	20.2005	2.00365	0.551904	3.63043	0.000282946	0.00133357	Pentatricopeptide repeat, Tetratricopeptide-like helical domain superfamily	GO:0005515
AeUmb.PI554389.v2.5U.G0076300	28.1833	4.01997	0.791032	5.08193	3.7362e-07	3.23048e-06	Multi antimicrobial extrusion protein, Multidrug and toxic compound extrusion family, eukaryotic	GO:0015297, GO:0016020, GO:0042910, GO:0055085, GO:1990961
AeUmb.PI554389.v2.5U.G0076400	18.7656	7.90963	1.26579	6.24878	4.13667e-10	5.8354e-09
AeUmb.PI554389.v2.5U.G0076500	372.112	4.67753	0.353094	13.2473	4.6799e-40	1.32096e-37	Cytochrome P450, Cytochrome P450 superfamily, E-class, conserved site, group I	GO:0004497, GO:0005506, GO:0016705, GO:0020037
AeUmb.PI554389.v2.5U.G0076700	1417.91	0.94429	0.166324	5.67741	1.36746e-08	1.5062e-07
AeUmb.PI554389.v2.5U.G0076800	15.0161	7.10369	1.2829	5.5372	3.07343e-08	3.19641e-07	Ureide permease, plant	GO:0016020, GO:0022857, GO:0071705
AeUmb.PI554389.v2.5U.G0076900	9.4191	4.82903	1.40541	3.43602	0.000590324	0.0025532
AeUmb.PI554389.v2.5U.G0077000	9.85106	6.19228	1.45561	4.25408	2.09915e-05	0.000129147
AeUmb.PI554389.v2.5U.G0077600	871.915	-0.913953	0.283922	-3.21903	0.00128627	0.00506359
AeUmb.PI554389.v2.5U.G0077700	128.923	10.0927	1.20112	8.40274	4.36164e-17	1.68238e-15	Deoxyuridine triphosphate nucleotidohydrolase, dUTPase-like	GO:0000287, GO:0004170, GO:0006226, GO:0046081
AeUmb.PI554389.v2.5U.G0077800	36.7273	4.2242	0.736037	5.73911	9.51739e-09	1.07295e-07
AeUmb.PI554389.v2.5U.G0078100	9.23293	5.67534	1.60171	3.54331	0.000395145	0.00178736
AeUmb.PI554389.v2.5U.G0079800	528.765	-0.7294	0.187549	-3.88911	0.000100611	0.000529289	C-terminal, MYND-type, Programmed cell death protein 2, Zinc finger	GO:0005737
AeUmb.PI554389.v2.5U.G0079900	210.61	-1.85127	0.313469	-5.90574	3.51073e-09	4.25486e-08
AeUmb.PI554389.v2.5U.G0080900	63.5824	-4.13859	0.522929	-7.91426	2.48734e-15	7.55762e-14
AeUmb.PI554389.v2.5U.G0081400	6336.15	-3.02853	0.144951	-20.8935	6.13797e-97	3.70758e-93	Peptidase S8, Peptidase S8/S53 domain, Peptidase S8/S53 domain superfamily, Ser-active site, Subtilisin-like protease, fibronectin type-III domain, subtilisin	GO:0004252, GO:0006508, GO:0008236
AeUmb.PI554389.v2.5U.G0081500	1595.5	-2.66903	0.396129	-6.73779	1.60818e-11	2.80592e-10	Peptidase S8, Peptidase S8 propeptide/proteinase inhibitor I9, Peptidase S8 propeptide/proteinase inhibitor I9 superfamily, Peptidase S8/S53 domain, Peptidase S8/S53 domain superfamily, Subtilisin-like protease, subtilisin-related	GO:0004252, GO:0006508, GO:0008236
AeUmb.PI554389.v2.5U.G0082000	26.6211	5.77424	1.22194	4.72546	2.29596e-06	1.71048e-05
AeUmb.PI554389.v2.5U.G0083400	132.855	-1.11218	0.287238	-3.87199	0.000107949	0.000563689
AeUmb.PI554389.v2.5U.G0085000	11.7871	-3.65569	1.16083	-3.14919	0.00163721	0.00625359	F-box-like domain superfamily, FBD domain, Leucine-rich repeat domain superfamily	GO:0005515
AeUmb.PI554389.v2.5U.G0085200	1386.84	-1.95757	0.241598	-8.10261	5.37927e-16	1.79123e-14	MFS transporter superfamily, Proton-dependent oligopeptide transporter family	GO:0016020, GO:0022857, GO:0055085
AeUmb.PI554389.v2.5U.G0086500	1740.47	-0.57281	0.18838	-3.04071	0.0023602	0.00861214	Sugar transporter SWEET, Sugar transporter SWEET repeat	GO:0016020, GO:0051119
AeUmb.PI554389.v2.5U.G0086800	42.7168	1.31837	0.540106	2.44094	0.0146491	0.0410839
AeUmb.PI554389.v2.5U.G0087000	41.462	3.52916	0.619039	5.70104	1.1908e-08	1.32369e-07
AeUmb.PI554389.v2.5U.G0087100	248.717	1.98526	0.236181	8.40567	4.25425e-17	1.64306e-15
AeUmb.PI554389.v2.5U.G0087200	420.138	1.69127	0.270177	6.25985	3.85344e-10	5.46392e-09	Glycoside hydrolase family 17, Glycoside hydrolase superfamily, X8 domain, plant	GO:0004553, GO:0005975
AeUmb.PI554389.v2.5U.G0087700	110.463	9.78345	1.19945	8.1566	3.44581e-16	1.18666e-14	F-box domain, F-box protein, F-box-like domain superfamily, Leucine-rich repeat domain superfamily, plant	GO:0005515
AeUmb.PI554389.v2.5U.G0087800	11.0072	6.80477	1.41761	4.80016	1.58539e-06	1.21652e-05
AeUmb.PI554389.v2.5U.G0088900	5.64177	-7.57423	1.78745	-4.23745	2.26075e-05	0.000137965	FAD/NAD(P)-binding domain superfamily, GDP dissociation inhibitor, Rab GDI protein	GO:0005092, GO:0005093, GO:0007264, GO:0015031
AeUmb.PI554389.v2.5U.G0089200	797.079	1.15833	0.153206	7.56059	4.0126e-14	1.01328e-12	PA clan, PDZ domain 6, PDZ superfamily, Peptidase S1, Peptidase S1C	GO:0004252, GO:0005515, GO:0006508
AeUmb.PI554389.v2.5U.G0090400	8.52219	-6.3179	1.87463	-3.37021	0.000751114	0.00315993
AeUmb.PI554389.v2.5U.G0090700	62.4108	1.49344	0.576586	2.59014	0.00959382	0.0287824
AeUmb.PI554389.v2.5U.G0090900	10.1545	6.69709	1.37877	4.85727	1.19013e-06	9.35317e-06
AeUmb.PI554389.v2.5U.G0091000	9.89166	6.14271	1.36073	4.51428	6.35323e-06	4.34315e-05
AeUmb.PI554389.v2.5U.G0091100	45.8214	-1.47627	0.588245	-2.50962	0.0120861	0.0349675	Leucine-rich repeat, Leucine-rich repeat domain superfamily, Leucine-rich repeat-containing N-terminal, plant-type, typical subtype	GO:0005515
AeUmb.PI554389.v2.5U.G0091200	31.1195	4.86096	1.49392	3.25383	0.00113861	0.00455413
AeUmb.PI554389.v2.5U.G0091400	105.518	4.27406	1.10259	3.87638	0.000106022	0.000554566
AeUmb.PI554389.v2.5U.G0091800	17.6936	7.26814	1.34937	5.38631	7.19183e-08	7.04077e-07
AeUmb.PI554389.v2.5U.G0092200	9.0063	6.13931	1.57027	3.90973	9.23999e-05	0.000490278
AeUmb.PI554389.v2.5U.G0093500	135.34	-1.88664	0.450933	-4.18385	2.86611e-05	0.000170768	HMA, Heavy metal binding protein HIPP-like, Heavy metal-associated domain, Heavy metal-associated domain superfamily	GO:0046872
AeUmb.PI554389.v2.5U.G0093700	129.545	6.99873	0.799304	8.75603	2.02248e-18	9.27594e-17
AeUmb.PI554389.v2.5U.G0094600	156.024	-1.05877	0.311629	-3.39753	0.000679972	0.00289328	Nucleic acid-binding, OB-fold, Small ribosomal subunit protein uS17, bacteria/chloroplast	GO:0003735, GO:0005840, GO:0006412
AeUmb.PI554389.v2.5U.G0095200	47.9353	5.62921	0.712893	7.89629	2.8732e-15	8.64307e-14	UDP-glucuronosyl/UDP-glucosyltransferase	GO:0008194
AeUmb.PI554389.v2.5U.G0095800	216.584	1.61278	0.564348	2.85777	0.00426629	0.0144015
AeUmb.PI554389.v2.5U.G0095900	283.478	1.53338	0.597756	2.56522	0.010311	0.0305937
AeUmb.PI554389.v2.5U.G0096100	135.377	8.70835	1.9203	4.5349	5.76304e-06	3.9775e-05	Cupin 1, Germin, RmlC-like cupin domain superfamily, RmlC-like jelly roll fold, manganese binding site	GO:0030145
AeUmb.PI554389.v2.5U.G0096800	667.429	1.34453	0.504587	2.66462	0.00770765	0.0238829
AeUmb.PI554389.v2.5U.G0097000	298.709	-1.55164	0.482355	-3.2168	0.00129627	0.00509767
AeUmb.PI554389.v2.5U.G0097500	750.274	-0.386918	0.161126	-2.40134	0.016335	0.0449561
AeUmb.PI554389.v2.5U.G0098700	9.12982	-6.69516	1.89234	-3.53804	0.000403109	0.00181929	CCHC-type superfamily, DNA/RNA polymerase superfamily, Domain of unknown function DUF4219, GAG-pre-integrase domain, Integrase, RNA-dependent DNA polymerase, Reverse transcriptase, Ribonuclease H superfamily, Ribonuclease H-like superfamily, Zinc finger, catalytic core	GO:0003676, GO:0008270, GO:0015074
AeUmb.PI554389.v2.5U.G0100800	980.447	-0.613001	0.242797	-2.52475	0.0115782	0.0337468	Acyl transferase/acyl hydrolase/lysophospholipase, Patatin-like phospholipase domain	GO:0006629
AeUmb.PI554389.v2.5U.G0101000	16.7228	7.26813	1.34315	5.41127	6.25787e-08	6.1947e-07
AeUmb.PI554389.v2.5U.G0101200	3.01637	-5.71991	1.88322	-3.03731	0.00238702	0.0086998
AeUmb.PI554389.v2.5U.G0101300	65.7607	2.16329	0.357995	6.04281	1.51455e-09	1.95313e-08
AeUmb.PI554389.v2.5U.G0102400	3.97221	4.9048	1.87318	2.61844	0.00883329	0.0268151	Auxin response factor, DNA-binding pseudobarrel domain superfamily	GO:0003677, GO:0006355, GO:0009725
AeUmb.PI554389.v2.5U.G0102500	33.0263	7.87057	1.26834	6.20542	5.4552e-10	7.53007e-09
AeUmb.PI554389.v2.5U.G0105000	2.03768	5.43864	2.11818	2.5676	0.0102407	0.0304178
AeUmb.PI554389.v2.5U.G0105100	32.1476	7.83337	1.30415	6.0065	1.89565e-09	2.40153e-08
AeUmb.PI554389.v2.5U.G0105400	99.5713	1.22953	0.330846	3.71631	0.000202152	0.00099049	C-terminal, G-patch domain, GCF, TFP11/STIP/Ntr1	GO:0000390, GO:0003676
AeUmb.PI554389.v2.5U.G0105900	1267.24	-0.927622	0.177138	-5.23673	1.63448e-07	1.50869e-06	NAC domain, NAC domain superfamily	GO:0003677, GO:0006355
AeUmb.PI554389.v2.5U.G0106100	167.322	-0.663428	0.263426	-2.51846	0.0117869	0.0342693	Methyltransferase domain, S-adenosyl-L-methionine-dependent methyltransferase superfamily	GO:0008757
AeUmb.PI554389.v2.5U.G0106400	21.0043	3.04133	0.834571	3.64419	0.000268239	0.0012718	Disease resistance protein, N-terminal, NB-ARC, P-loop containing nucleoside triphosphate hydrolase, Rx, Winged helix-like DNA-binding domain superfamily, plants	GO:0006952, GO:0043531
AeUmb.PI554389.v2.5U.G0106500	8.29458	3.32204	1.05484	3.14933	0.00163647	0.00625154
AeUmb.PI554389.v2.5U.G0106800	140.529	8.23532	1.25996	6.53618	6.31119e-11	1.00374e-09	PA clan, PDZ domain, PDZ domain 6, PDZ superfamily, Peptidase S1	GO:0005515
AeUmb.PI554389.v2.5U.G0106900	3952.91	1.85323	0.487116	3.8045	0.000142093	0.000722529	Basic helix-loop-helix (bHLH) transcription factors ALC-like, Helix-loop-helix DNA-binding domain superfamily, Myc-type, Transcription factor PIF1-like, basic helix-loop-helix (bHLH) domain, basic helix-loop-helix domain, plant	GO:0046983
AeUmb.PI554389.v2.5U.G0107400	175.626	0.79637	0.303391	2.6249	0.00866747	0.0263705
AeUmb.PI554389.v2.5U.G0108000	13.8498	-6.75199	1.68021	-4.01855	5.85583e-05	0.00032451	NSF attachment protein, Tetratricopeptide-like helical domain superfamily	GO:0005515, GO:0006886
AeUmb.PI554389.v2.5U.G0108100	25.4577	7.36533	1.25912	5.8496	4.92749e-09	5.80669e-08
AeUmb.PI554389.v2.5U.G0108200	6.33719	5.59805	1.40117	3.99527	6.46205e-05	0.000354578
AeUmb.PI554389.v2.5U.G0108700	48.63	8.32266	1.21379	6.85678	7.04321e-12	1.30183e-10
AeUmb.PI554389.v2.5U.G0108800	76.9391	2.27749	0.405768	5.6128	1.99077e-08	2.12682e-07
AeUmb.PI554389.v2.5U.G0109000	169.712	1.23556	0.353724	3.49299	0.000477642	0.00211149	ATP binding site, Gnk2-homologous domain, Gnk2-homologous domain superfamily, Protein kinase, Protein kinase domain, Protein kinase-like domain superfamily, Serine/threonine-protein kinase, active site	GO:0004672, GO:0005524, GO:0006468
AeUmb.PI554389.v2.5U.G0109100	476.468	0.640695	0.216592	2.95807	0.00309574	0.0109162	ATP binding site, Gnk2-homologous domain, Gnk2-homologous domain superfamily, Protein kinase, Protein kinase domain, Protein kinase-like domain superfamily, Serine/threonine-protein kinase, active site	GO:0004672, GO:0005524, GO:0006468
AeUmb.PI554389.v2.5U.G0109400	53.0399	-1.57708	0.461275	-3.41895	0.000628628	0.00270184
AeUmb.PI554389.v2.5U.G0109500	14.9831	-2.23158	0.753753	-2.96062	0.00307016	0.0108399
AeUmb.PI554389.v2.5U.G0109600	44.4044	1.41125	0.584475	2.41455	0.0157545	0.0436088
AeUmb.PI554389.v2.5U.G0109800	10.7442	4.32584	1.42646	3.03258	0.00242476	0.0088232
AeUmb.PI554389.v2.5U.G0109900	6.83591	4.85226	1.59974	3.03316	0.00242006	0.00881034	Wall-associated receptor kinase, galacturonan-binding domain	GO:0030247
AeUmb.PI554389.v2.5U.G0110000	26.9552	4.99852	1.27888	3.9085	9.28693e-05	0.000492423	ATP binding site, Protein kinase, Protein kinase domain, Protein kinase-like domain superfamily, Serine/threonine-protein kinase, active site	GO:0004672, GO:0005524, GO:0006468
AeUmb.PI554389.v2.5U.G0110500	375.069	2.9996	0.204037	14.7012	6.32841e-49	2.73044e-46	C-terminal domain superfamily, Ku70, Ku70/Ku80, Ku70/Ku80 C-terminal arm, Ku70/Ku80 beta-barrel domain, N-terminal alpha/beta, SAP domain, SAP domain superfamily, SPOC-like, bridge and pillars domain superfamily, core domain, von Willebrand factor A-like domain superfamily	GO:0000723, GO:0003677, GO:0003678, GO:0003684, GO:0005634, GO:0006303, GO:0042162, GO:0043564
AeUmb.PI554389.v2.5U.G0111100	140.731	10.0124	1.19416	8.38447	5.09569e-17	1.95553e-15
AeUmb.PI554389.v2.5U.G0111200	452.358	9.73841	1.03134	9.44245	3.64156e-21	2.34504e-19
AeUmb.PI554389.v2.5U.G0111600	23.7746	7.26661	1.22686	5.92294	3.16232e-09	3.87144e-08	Piwi domain, Ribonuclease H superfamily, Ribonuclease H-like superfamily, Ubiquitin-like domain, Ubiquitin-like domain superfamily	GO:0003676, GO:0005515
AeUmb.PI554389.v2.5U.G0111700	36.2597	1.32789	0.424758	3.12622	0.0017707	0.00669654	Argonaute, Argonaute linker 2 domain, Argonaute-like, Mid domain, N-terminal, PAZ domain, PAZ domain superfamily, PIWI domain, Piwi domain, Protein argonaute, Ribonuclease H superfamily, Ribonuclease H-like superfamily, linker 1 domain	GO:0003676, GO:0003723, GO:0005515
AeUmb.PI554389.v2.5U.G0111800	5.3491	4.57169	1.61191	2.83619	0.00456554	0.015265
AeUmb.PI554389.v2.5U.G0112000	45.9077	-9.20734	1.49517	-6.15806	7.3642e-10	9.9425e-09
AeUmb.PI554389.v2.5U.G0112800	19.933	-7.26353	1.67997	-4.32361	1.53494e-05	9.69637e-05	ATP binding site, Protein kinase, Protein kinase domain, Protein kinase-like domain superfamily, Serine/threonine-protein kinase, active site	GO:0004672, GO:0005524, GO:0006468
AeUmb.PI554389.v2.5U.G0113100	42.0779	8.65525	1.23017	7.03579	1.9814e-12	3.96568e-11
AeUmb.PI554389.v2.5U.G0113500	48.8786	3.03339	0.860898	3.52352	0.000425858	0.00191021	Histone H2A/H2B/H3, Histone H2B, Histone-fold	GO:0000786, GO:0003677, GO:0030527, GO:0046982
AeUmb.PI554389.v2.5U.G0115200	54.2427	5.14844	0.660402	7.79593	6.3938e-15	1.8132e-13
AeUmb.PI554389.v2.5U.G0115300	22.9984	5.52135	1.07207	5.15017	2.60256e-07	2.30641e-06	ATP binding site, Protein kinase, Protein kinase domain, Protein kinase-like domain superfamily, Serine/threonine-protein kinase, active site	GO:0004672, GO:0005524, GO:0006468
AeUmb.PI554389.v2.5U.G0115500	57.5876	1.99643	0.566331	3.52519	0.000423175	0.00189984
AeUmb.PI554389.v2.5U.G0115600	17.6522	7.60478	1.299	5.85434	4.78908e-09	5.65883e-08	ATP binding site, Protein kinase, Protein kinase domain, Protein kinase-like domain superfamily, Serine/threonine-protein kinase, active site	GO:0004672, GO:0005524, GO:0006468
AeUmb.PI554389.v2.5U.G0115700	810.984	12.5699	1.18051	10.6479	1.78382e-26	2.08817e-24
AeUmb.PI554389.v2.5U.G0115800	7.49388	5.69521	1.42793	3.98844	6.65079e-05	0.000363824	Papain-like cysteine peptidase superfamily, Peptidase C19, Ubiquitin carboxyl-terminal hydrolase 14-like, Ubiquitin specific protease, Ubiquitin specific protease domain, conserved site, ubiquitin carboxyl-terminal hydrolase	GO:0004843, GO:0016579, GO:0043161
AeUmb.PI554389.v2.5U.G0116100	38.9339	3.98894	0.660967	6.035	1.58965e-09	2.03867e-08
AeUmb.PI554389.v2.5U.G0116300	9.91735	3.29131	0.922237	3.56883	0.000358581	0.00163841	ATP binding site, Protein kinase, Protein kinase domain, Protein kinase-like domain superfamily, Serine/threonine-protein kinase, active site	GO:0004672, GO:0005524, GO:0006468
AeUmb.PI554389.v2.5U.G0116500	40.7534	6.3356	1.07742	5.88034	4.09415e-09	4.9068e-08
AeUmb.PI554389.v2.5U.G0116600	20.4099	5.56686	1.07362	5.18512	2.15878e-07	1.93834e-06	ATP binding site, Protein kinase, Protein kinase domain, Protein kinase-like domain superfamily, Serine/threonine-protein kinase, active site	GO:0004672, GO:0005524, GO:0006468
AeUmb.PI554389.v2.5U.G0117000	3.71549	5.20783	1.82661	2.85109	0.00435701	0.0146799
AeUmb.PI554389.v2.5U.G0117400	3783.16	1.89324	0.200163	9.4585	3.12402e-21	2.03784e-19	Actin-crosslinking, Fascin, Glycoside hydrolase, Glycoside hydrolase superfamily, conserved site, family 5	GO:0004553, GO:0005975, GO:0007015, GO:0051015, GO:0071704
AeUmb.PI554389.v2.5U.G0117500	8.94665	-5.50775	1.94275	-2.83503	0.00458211	0.0153187
AeUmb.PI554389.v2.5U.G0117700	5.29973	4.86697	1.53849	3.16348	0.00155897	0.00599326	ATP binding site, Protein kinase, Protein kinase domain, Protein kinase-like domain superfamily, Serine/threonine-protein kinase, active site	GO:0004672, GO:0005524, GO:0006468
AeUmb.PI554389.v2.5U.G0117900	1689.89	0.732278	0.154425	4.74195	2.11669e-06	1.58947e-05	BHMT, Betaine-homocysteine S-methyltransferase, Homocysteine-binding domain, Homocysteine-binding domain superfamily	GO:0008168, GO:0008270, GO:0009086
AeUmb.PI554389.v2.5U.G0118200	145.509	1.32372	0.255122	5.18858	2.11902e-07	1.9087e-06	C-terminal catalytic domain, Papain-like cysteine peptidase superfamily, Ulp1 protease family	GO:0006508, GO:0008234
AeUmb.PI554389.v2.5U.G0119400	2.77196	6.43851	2.58241	2.49322	0.0126591	0.0363535
AeUmb.PI554389.v2.5U.G0120400	96.0251	0.940851	0.377133	2.49474	0.0126048	0.0362321	F-box-like domain superfamily	GO:0005515
AeUmb.PI554389.v2.5U.G0120900	460.989	-0.4722	0.173676	-2.71886	0.00655083	0.0208042	CRC domain, CRC domain-containing protein TSO1-like, Tesmin/TSO1-like CXC domain	GO:0003700
AeUmb.PI554389.v2.5U.G0121100	674.775	-0.418197	0.165679	-2.52414	0.0115983	0.0337925	Armadillo-type fold, C2 domain superfamily, C2 phosphatidylinositol 3-kinase-type domain, Phosphatidylinositol 3-/4-kinase, Phosphatidylinositol 3-kinase, Phosphatidylinositol 3/4-kinase, Phosphatidylinositol kinase, Phosphoinositide 3-kinase, Protein kinase-like domain superfamily, Vps34 type, accessory (PIK) domain, accessory (PIK) domain superfamily, catalytic domain, catalytic domain superfam…	GO:0016301, GO:0016303, GO:0046854, GO:0048015
AeUmb.PI554389.v2.5U.G0121600	17.8518	-6.69745	1.59609	-4.19617	2.7147e-05	0.00016258
AeUmb.PI554389.v2.5U.G0121700	4266.39	-0.639611	0.107941	-5.92554	3.1128e-09	3.817e-08
AeUmb.PI554389.v2.5U.G0122500	513.64	12.1822	1.18935	10.2427	1.27628e-24	1.23545e-22	CCHC-type, CCHC-type superfamily, Zinc finger	GO:0003676, GO:0008270
AeUmb.PI554389.v2.5U.G0122700	159.608	8.49874	1.03809	8.18687	2.68098e-16	9.41523e-15
AeUmb.PI554389.v2.5U.G0123400	11.2982	7.08114	1.4291	4.95498	7.23395e-07	5.93211e-06
AeUmb.PI554389.v2.5U.G0123700	534.451	12.2952	1.18185	10.4033	2.39378e-25	2.51031e-23	Armadillo-like helical, Armadillo-type fold, Importin beta family, Importin-beta, N-terminal domain	GO:0006606, GO:0006886, GO:0031267
AeUmb.PI554389.v2.5U.G0123900	347.028	11.6305	1.18915	9.78047	1.36577e-22	1.03902e-20	Armadillo-like helical, Armadillo-type fold, Importin beta family, Importin-beta, N-terminal domain	GO:0006606, GO:0006886, GO:0031267
AeUmb.PI554389.v2.5U.G0124000	3.63792	4.6185	1.87876	2.45828	0.0139606	0.0394755
AeUmb.PI554389.v2.5U.G0124100	2.57517	5.10831	2.12936	2.39899	0.0164406	0.0452097
AeUmb.PI554389.v2.5U.G0124200	105.878	7.10329	0.860868	8.25131	1.56662e-16	5.67328e-15
AeUmb.PI554389.v2.5U.G0124300	6.0449	6.13694	1.37955	4.44851	8.64685e-06	5.73834e-05
AeUmb.PI554389.v2.5U.G0124400	19.0392	7.24198	1.29156	5.60717	2.0566e-08	2.19095e-07
AeUmb.PI554389.v2.5U.G0125000	233.671	-3.97426	0.389329	-10.208	1.82633e-24	1.74553e-22	GB1/RHD3-type guanine nucleotide-binding (G) domain, P-loop containing nucleoside triphosphate hydrolase, RHD3/Sey1, Sey1/RHD3-like, three-helix bundle domain	GO:0005525
AeUmb.PI554389.v2.5U.G0125700	6.30745	5.3374	1.62393	3.28672	0.0010136	0.00410854
AeUmb.PI554389.v2.5U.G0125800	3.40923	5.33814	1.95898	2.72495	0.00643109	0.0204843
AeUmb.PI554389.v2.5U.G0125900	173.466	-2.81829	0.375408	-7.50726	6.03765e-14	1.491e-12
AeUmb.PI554389.v2.5U.G0126300	81.4819	-7.13804	1.05676	-6.75463	1.43203e-11	2.51748e-10
AeUmb.PI554389.v2.5U.G0127100	48.8548	-8.81228	1.47922	-5.95737	2.56324e-09	3.17796e-08
AeUmb.PI554389.v2.5U.G0127500	572.897	9.53994	0.74765	12.7599	2.74502e-37	6.85165e-35
AeUmb.PI554389.v2.5U.G0129700	22.6391	6.73978	1.2913	5.21937	1.7953e-07	1.64457e-06
AeUmb.PI554389.v2.5U.G0129900	9.19695	4.37963	1.4081	3.11031	0.00186894	0.00701014
AeUmb.PI554389.v2.5U.G0131200	108.46	1.23708	0.305466	4.04981	5.12593e-05	0.000288615	E3 ubiquitin protein ligase DRIP1-like, RING-type, RING/FYVE/PHD-type, Zinc finger, conserved site	GO:0004842
AeUmb.PI554389.v2.5U.G0132000	7.16776	-7.27337	1.82012	-3.9961	6.43951e-05	0.000353547	ATPase, Heat shock protein 70, Heat shock protein 70 family, conserved site, nucleotide binding domain	GO:0005524, GO:0140662
AeUmb.PI554389.v2.5U.G0134000	244.906	2.59025	0.238717	10.8507	1.97888e-27	2.54324e-25
AeUmb.PI554389.v2.5U.G0134400	7.31908	-6.3647	2.1097	-3.01688	0.00255395	0.00922881
AeUmb.PI554389.v2.5U.G0134800	249.122	0.682594	0.26843	2.54292	0.0109932	0.0322785
AeUmb.PI554389.v2.5U.G0135600	18.1936	6.69579	1.24304	5.38663	7.17925e-08	7.03073e-07
AeUmb.PI554389.v2.5U.G0135900	134.358	-1.09652	0.334724	-3.27588	0.00105333	0.00424623	Glycosylphosphatidylinositol-mannosyltransferase I, PIG-X/PBN1, Phosphatidylinositol-glycan biosynthesis class X protein	GO:0005789, GO:0006506
AeUmb.PI554389.v2.5U.G0136000	1544.76	-0.647882	0.135212	-4.7916	1.65456e-06	1.26733e-05
AeUmb.PI554389.v2.5U.G0136600	5.40007	-6.09548	1.97636	-3.08419	0.00204105	0.00757945	DNA/RNA polymerase superfamily, Integrase, Integrase zinc-binding domain, RNase H-like domain, Reverse transcriptase, Ribonuclease H superfamily, Ribonuclease H-like superfamily, catalytic core	GO:0003676, GO:0015074
AeUmb.PI554389.v2.5U.G0137500	33.204	2.1123	0.673222	3.13759	0.00170343	0.00647541
AeUmb.PI554389.v2.5U.G0138100	69.5516	-1.07765	0.372869	-2.89015	0.00385052	0.0131703
AeUmb.PI554389.v2.5U.G0138600	2026.52	-0.363923	0.132503	-2.74654	0.00602284	0.0193492
AeUmb.PI554389.v2.5U.G0139300	583.142	-1.50616	0.350611	-4.2958	1.74062e-05	0.000108819
AeUmb.PI554389.v2.5U.G0139400	1736.17	-0.837639	0.177588	-4.71675	2.39645e-06	1.78051e-05	ATP binding site, PB1 domain, Protein kinase, Protein kinase domain, Protein kinase-like domain superfamily, Serine-threonine/tyrosine-protein kinase, Serine/threonine-protein kinase, active site, catalytic domain	GO:0004672, GO:0005515, GO:0005524, GO:0006468
AeUmb.PI554389.v2.5U.G0139500	2593.81	0.653982	0.243068	2.69053	0.00713393	0.0223621
AeUmb.PI554389.v2.5U.G0140800	40.619	7.85038	1.29155	6.07824	1.21508e-09	1.59072e-08
AeUmb.PI554389.v2.5U.G0141300	971.613	-0.499549	0.166581	-2.99883	0.00271018	0.00971567	FYVE/PHD-type, G protein alpha subunit, Guanine nucleotide binding protein (G-protein), P-loop containing nucleoside triphosphate hydrolase, Zinc finger, alpha subunit, helical insertion	GO:0003924, GO:0007165, GO:0007186, GO:0019001, GO:0031683
AeUmb.PI554389.v2.5U.G0141500	51.1378	8.44932	1.21366	6.96182	3.35893e-12	6.4905e-11	Protein kinase domain, Protein kinase-like domain superfamily, Serine/threonine-protein kinase, active site	GO:0004672, GO:0005524, GO:0006468
AeUmb.PI554389.v2.5U.G0142100	792.991	-0.782419	0.203775	-3.83962	0.000123223	0.000634647	Histone deacetylase class II, Histone deacetylase domain, Histone deacetylase domain superfamily, Histone deacetylase family, RanBP2-type, Ureohydrolase domain superfamily, Zinc finger, eukaryotic-type	GO:0000118, GO:0004407, GO:0006325, GO:0016575
AeUmb.PI554389.v2.5U.G0142700	128.394	1.39866	0.548462	2.55015	0.0107677	0.0317428
AeUmb.PI554389.v2.5U.G0142800	177.995	-2.63701	0.466134	-5.6572	1.53865e-08	1.68109e-07	UDP-glucuronosyl/UDP-glucosyltransferase, UDP-glycosyltransferase family, conserved site	GO:0008194
AeUmb.PI554389.v2.5U.G0143800	7.23451	4.00999	1.18011	3.39799	0.000678828	0.00288882
AeUmb.PI554389.v2.5U.G0143900	16.1647	-2.33971	0.798967	-2.92842	0.0034069	0.011857
AeUmb.PI554389.v2.5U.G0144700	198.496	-0.780865	0.24224	-3.22351	0.00126629	0.00499341	B3 DNA binding domain, B3 domain-containing protein REM16-like, DNA-binding pseudobarrel domain superfamily	GO:0003677
AeUmb.PI554389.v2.5U.G0145000	31.0898	-7.8034	1.50622	-5.18079	2.20949e-07	1.98192e-06	B3 DNA binding domain, B3 domain-containing protein REM16-like, DNA-binding pseudobarrel domain superfamily	GO:0003677
AeUmb.PI554389.v2.5U.G0145100	49.2253	-8.96842	1.5516	-5.78012	7.4649e-09	8.53996e-08	CCHC-type, CCHC-type superfamily, Domain of unknown function DUF4283, Zinc finger	GO:0003676, GO:0008270
AeUmb.PI554389.v2.5U.G0145300	24.0503	2.15813	0.579916	3.72145	0.000198079	0.000973063	Apoptotic protease-activating factors, Disease resistance protein, Leucine-rich repeat domain superfamily, N-terminal, NB-ARC, P-loop containing nucleoside triphosphate hydrolase, Rx, Winged helix-like DNA-binding domain superfamily, helical domain, plants	GO:0006952, GO:0043531
AeUmb.PI554389.v2.5U.G0145800	294.075	-0.927804	0.344975	-2.68948	0.00715632	0.0224197	B3 DNA binding domain, B3 domain-containing protein REM16-like, DNA-binding pseudobarrel domain superfamily	GO:0003677
AeUmb.PI554389.v2.5U.G0145900	48.0729	5.21583	0.710724	7.33876	2.15583e-13	4.89552e-12
AeUmb.PI554389.v2.5U.G0146000	230.981	5.11245	0.512673	9.97215	2.01803e-23	1.67902e-21
AeUmb.PI554389.v2.5U.G0146300	190.167	3.14989	0.57029	5.52331	3.32673e-08	3.43383e-07	Kinesin motor domain, Kinesin motor domain superfamily, Kinesin-like protein KIF15/KIN-12, P-loop containing nucleoside triphosphate hydrolase, conserved site	GO:0003777, GO:0005524, GO:0007018, GO:0008017
AeUmb.PI554389.v2.5U.G0147000	57.7128	1.1931	0.37214	3.20604	0.00134575	0.00527367	F-box-like domain superfamily, FBD domain, Leucine-rich repeat domain superfamily	GO:0005515
AeUmb.PI554389.v2.5U.G0147200	88.4064	-6.89146	1.10575	-6.23237	4.59438e-10	6.43597e-09
AeUmb.PI554389.v2.5U.G0147600	3223.67	-0.53114	0.192822	-2.75456	0.00587714	0.0189375	A domain superfamily, C-terminal, Calcium-transporting P-type ATPase, Cation-transporting P-type ATPase, HAD superfamily, HAD-like superfamily, N-terminal, N-terminal autoinhibitory domain, P-type ATPase, cytoplasmic domain N, haloacid dehalogenase domain, phosphorylation site, subfamily IIB, transmembrane domain superfamily	GO:0000166, GO:0005215, GO:0005388, GO:0005516, GO:0005524, GO:0016020, GO:0016887, GO:0070588
AeUmb.PI554389.v2.5U.G0147700	207.677	-0.593724	0.216648	-2.74051	0.00613446	0.0196513
AeUmb.PI554389.v2.5U.G0148000	2786.29	-0.582841	0.198835	-2.93128	0.00337568	0.0117674	Homeobox-like domain superfamily, Myb domain, Myb family transcription factor HRS1-like, SANT/Myb domain, plants	GO:0003677, GO:0003700, GO:0006355
AeUmb.PI554389.v2.5U.G0148400	13.1994	1.89307	0.785641	2.40959	0.0159705	0.0441259	F-box-like domain superfamily, FBD domain, Leucine-rich repeat domain superfamily	GO:0005515
AeUmb.PI554389.v2.5U.G0148600	88.0222	-1.50324	0.376341	-3.99437	6.48673e-05	0.000355751	F-box-like domain superfamily, FBD domain	GO:0005515
AeUmb.PI554389.v2.5U.G0148800	1434.35	-0.576244	0.150812	-3.82093	0.000132948	0.000680904	ATP binding site, Protein kinase, Protein kinase domain, Protein kinase-like domain superfamily, Serine/threonine-protein kinase, active site	GO:0004672, GO:0005524, GO:0006468
AeUmb.PI554389.v2.5U.G0149000	39.8731	1.47858	0.572535	2.58251	0.00980848	0.0293361
AeUmb.PI554389.v2.5U.G0149300	210.987	7.77847	1.56075	4.98381	6.23442e-07	5.18567e-06	Bifunctional inhibitor/plant lipid transfer protein/seed storage helical domain, Bifunctional inhibitor/plant lipid transfer protein/seed storage helical domain superfamily, Non-specific lipid-transfer protein-like, Putative lipid-transfer protein DIR1-like	GO:0005504, GO:0009627
AeUmb.PI554389.v2.5U.G0149800	2208.62	-10.2082	0.636242	-16.0446	6.23931e-58	4.48665e-55
AeUmb.PI554389.v2.5U.G0150300	288.892	0.750232	0.299375	2.50599	0.0122109	0.0352473
AeUmb.PI554389.v2.5U.G0151100	119.934	-10.1493	1.50747	-6.7327	1.66547e-11	2.89583e-10
AeUmb.PI554389.v2.5U.G0151200	11.337	-7.51809	1.56138	-4.81502	1.47188e-06	1.13547e-05	Aminotransferase-like, Protein MAINTENANCE OF MERISTEMS-like, plant mobile domain	GO:0010073, GO:0048507
AeUmb.PI554389.v2.5U.G0151600	201.965	-1.23111	0.30211	-4.07503	4.60088e-05	0.000261441	Cytochrome P450 superfamily	GO:0004497, GO:0005506, GO:0016705, GO:0020037
AeUmb.PI554389.v2.5U.G0151700	648.781	-1.48201	0.20026	-7.40042	1.35752e-13	3.18817e-12	Cytochrome P450, Cytochrome P450 superfamily, E-class, conserved site, group I	GO:0004497, GO:0005506, GO:0016705, GO:0020037
AeUmb.PI554389.v2.5U.G0153400	69.9251	1.32688	0.443051	2.99486	0.0027457	0.00983114
AeUmb.PI554389.v2.5U.G0153800	1834.21	0.573051	0.170377	3.36343	0.000769815	0.00322602	Amino acid/polyamine transporter I, Polyamine transporter RMV1-like	GO:0016020, GO:0022857, GO:0055085
AeUmb.PI554389.v2.5U.G0154600	32.6935	1.68703	0.621723	2.71348	0.00665807	0.0210827
AeUmb.PI554389.v2.5U.G0155500	3199.8	-7.8409	0.319711	-24.525	7.99839e-133	8.05225e-129	Ubiquitin conserved site, Ubiquitin domain, Ubiquitin-like domain, Ubiquitin-like domain superfamily	GO:0005515
AeUmb.PI554389.v2.5U.G0155900	12115.3	-0.86977	0.153957	-5.64944	1.6097e-08	1.7513e-07	Ubiquitin conserved site, Ubiquitin domain, Ubiquitin-like domain, Ubiquitin-like domain superfamily	GO:0005515
AeUmb.PI554389.v2.5U.G0156100	984.296	-0.462864	0.187962	-2.46254	0.0137957	0.0390825	Glycoside hydrolase, Glycoside hydrolase superfamily, family 79	GO:0016020, GO:0016798
AeUmb.PI554389.v2.5U.G0156400	1160.19	-1.65445	0.251972	-6.566	5.16855e-11	8.34316e-10	AAA+ ATPase domain, AAA-type, AAA-type ATPase, ATPase, N-terminal domain, P-loop containing nucleoside triphosphate hydrolase, conserved site, core	GO:0005524, GO:0016887
AeUmb.PI554389.v2.5U.G0156500	295.131	1.02318	0.216368	4.72888	2.25762e-06	1.68598e-05	Ketol-acid reductoisomerase, N-terminal, NAD(P)-binding domain superfamily	GO:0009082, GO:0016491
AeUmb.PI554389.v2.5U.G0156600	29.4016	-7.43559	1.62981	-4.56223	5.06137e-06	3.53441e-05	Nucleotide-binding alpha-beta plait domain superfamily, RNA recognition motif domain, RNA-binding domain superfamily	GO:0003676, GO:0003723
AeUmb.PI554389.v2.5U.G0157700	480.746	1.78694	0.251098	7.11652	1.10689e-12	2.29289e-11
AeUmb.PI554389.v2.5U.G0157800	229.603	1.80134	0.325465	5.53466	3.1183e-08	3.23455e-07
AeUmb.PI554389.v2.5U.G0158600	86.8237	-1.60751	0.584936	-2.74817	0.00599283	0.0192671
AeUmb.PI554389.v2.5U.G0158900	45.7056	8.45375	1.27072	6.65272	2.87731e-11	4.82262e-10
AeUmb.PI554389.v2.5U.G0160600	110.44	9.42762	1.19788	7.87023	3.53998e-15	1.04715e-13
AeUmb.PI554389.v2.5U.G0160700	93.6017	9.59283	1.22034	7.86081	3.81655e-15	1.12529e-13
AeUmb.PI554389.v2.5U.G0161500	36.8009	-7.90254	1.59064	-4.96814	6.75975e-07	5.57504e-06
AeUmb.PI554389.v2.5U.G0161600	252.237	1.56023	0.261971	5.95572	2.58922e-09	3.20629e-08
AeUmb.PI554389.v2.5U.G0162000	134.815	1.97575	0.353101	5.59543	2.20075e-08	2.33531e-07	Mitochondrial import receptor subunit TOM5 homologue, viridiplantae	GO:0005742
AeUmb.PI554389.v2.5U.G0162400	179.137	10.3109	1.19789	8.60758	7.4622e-18	3.20132e-16
AeUmb.PI554389.v2.5U.G0162500	40.2915	6.25486	1.08724	5.75298	8.76819e-09	9.94805e-08
AeUmb.PI554389.v2.5U.G0163600	37.4173	8.40347	1.23449	6.80723	9.94945e-12	1.79613e-10
AeUmb.PI554389.v2.5U.G0163700	13.0477	-3.54581	1.02057	-3.47434	0.000512111	0.00224384
AeUmb.PI554389.v2.5U.G0163800	45.1974	8.45932	1.21459	6.96477	3.28941e-12	6.36838e-11
AeUmb.PI554389.v2.5U.G0163900	469.945	11.9995	1.1901	10.0827	6.58618e-24	5.86772e-22
AeUmb.PI554389.v2.5U.G0164000	45.3308	7.83959	1.22733	6.38751	1.68612e-10	2.51105e-09
AeUmb.PI554389.v2.5U.G0164100	118.42	9.54622	1.19267	8.00408	1.20368e-15	3.82265e-14
AeUmb.PI554389.v2.5U.G0164200	84.131	8.87298	1.20707	7.35084	1.96962e-13	4.5134e-12
AeUmb.PI554389.v2.5U.G0164300	23.1263	6.37596	1.29571	4.92083	8.61758e-07	6.96277e-06
AeUmb.PI554389.v2.5U.G0164400	71.4409	-1.77097	0.56512	-3.13379	0.00172566	0.00654836	DVL	GO:0008285
AeUmb.PI554389.v2.5U.G0164600	256.083	3.8343	0.37877	10.123	4.36648e-24	3.98418e-22
AeUmb.PI554389.v2.5U.G0164800	84.341	9.46398	1.20645	7.84452	4.34628e-15	1.26583e-13
AeUmb.PI554389.v2.5U.G0165000	455.652	1.49584	0.264247	5.66076	1.50703e-08	1.65192e-07
AeUmb.PI554389.v2.5U.G0165100	51.6335	8.9938	1.21154	7.42344	1.14121e-13	2.71383e-12
AeUmb.PI554389.v2.5U.G0165400	10.1862	-6.97679	1.68845	-4.13206	3.59524e-05	0.00020954
AeUmb.PI554389.v2.5U.G0165700	14.0172	3.54201	0.880989	4.02049	5.80761e-05	0.00032231	F-box domain, F-box-like domain superfamily	GO:0005515
AeUmb.PI554389.v2.5U.G0166300	39.4113	-9.78501	1.50187	-6.51522	7.25814e-11	1.1447e-09	Ankyrin repeat, Ankyrin repeat-containing domain superfamily, Nucleotide-binding alpha-beta plait domain superfamily, OST-HTH/LOTUS domain, RING-type, RNA recognition motif domain, RNA-binding domain superfamily, Zinc finger, conserved site	GO:0003676, GO:0003723, GO:0005515
AeUmb.PI554389.v2.5U.G0167200	195.807	7.14391	0.775278	9.21464	3.12317e-20	1.78987e-18
AeUmb.PI554389.v2.5U.G0168400	62.7543	1.35727	0.492973	2.75324	0.00590086	0.0190038
AeUmb.PI554389.v2.5U.G0168500	284.302	-0.537406	0.221305	-2.42835	0.0151677	0.0422871
AeUmb.PI554389.v2.5U.G0169000	1803.17	-0.508771	0.188277	-2.70225	0.00688727	0.0216835	Adaptor protein Cbl, Armadillo, Armadillo-like helical, Armadillo-type fold, N-terminal domain superfamily, PUB protein, RING/FYVE/PHD-type, U-box domain, Zinc finger, plant	GO:0004842, GO:0005515, GO:0007166, GO:0016567
AeUmb.PI554389.v2.5U.G0169300	5049.15	0.922539	0.227228	4.05997	4.90796e-05	0.000277481	ATPase, C-terminal domain superfamily, Heat shock protein 70, Heat shock protein 70 family, Heat shock protein 70kD, conserved site, nucleotide binding domain, peptide-binding domain superfamily	GO:0005524, GO:0140662
AeUmb.PI554389.v2.5U.G0169900	263.967	-1.01042	0.265889	-3.80015	0.000144611	0.000734162	Beta-grasp domain superfamily, Molybdopterin synthase/thiamin biosynthesis sulphur carrier, Ubiquitin-related modifier 1, beta-grasp	GO:0005737, GO:0034227
AeUmb.PI554389.v2.5U.G0170200	9.77688	6.7877	1.50377	4.51379	6.36805e-06	4.3523e-05
AeUmb.PI554389.v2.5U.G0170600	30.6612	2.63058	0.909082	2.89366	0.00380776	0.0130403
AeUmb.PI554389.v2.5U.G0172600	2066.3	0.461752	0.143516	3.21743	0.00129344	0.00508849	DapF, Diaminopimelate epimerase, active site	GO:0005737, GO:0008837, GO:0009089
AeUmb.PI554389.v2.5U.G0174300	4.1974	5.40422	1.74629	3.09469	0.0019702	0.00734527	PMZ-type, SWIM-type, Zinc finger	GO:0008270
AeUmb.PI554389.v2.5U.G0175000	3199.14	-0.406674	0.139424	-2.91682	0.00353619	0.0122393	ATP-citrate synthase, ATP-grasp fold, Succinate--CoA synthetase, Succinyl-CoA synthetase-like, beta subunit, citrate-binding domain, succinyl-CoA synthetase-type	GO:0006099
AeUmb.PI554389.v2.5U.G0175200	107.537	-1.77264	0.394401	-4.49451	6.97299e-06	4.72936e-05
AeUmb.PI554389.v2.5U.G0175500	456.018	-0.711267	0.300524	-2.36675	0.017945	0.0486468	Bicarbonate transporter, Bicarbonate transporter-like, eukaryotic, transmembrane domain	GO:0005452, GO:0006820, GO:0016020
AeUmb.PI554389.v2.5U.G0177100	134.717	-0.950521	0.29456	-3.22692	0.00125131	0.00494403
AeUmb.PI554389.v2.5U.G0177500	732.117	0.736811	0.123665	5.9581	2.55185e-09	3.16514e-08	Aminopeptidase P, Creatinase/Aminopeptidase P/Spt16, Creatinase/aminopeptidase-like, N-terminal, Peptidase M24, methionine aminopeptidase	GO:0030145, GO:0070006
AeUmb.PI554389.v2.5U.G0178400	59.8531	9.06548	1.27601	7.10455	1.20715e-12	2.48862e-11
AeUmb.PI554389.v2.5U.G0178600	403.091	-0.624459	0.217585	-2.86995	0.00410534	0.0139424	Amidohydrolase-related, Metal-dependent hydrolase, composite domain superfamily	GO:0016787, GO:0016810
AeUmb.PI554389.v2.5U.G0179500	59.4253	8.77053	1.2668	6.92336	4.41053e-12	8.37779e-11	Domain of unknown function DUF629, Papain-like cysteine peptidase superfamily, Tetratricopeptide-like helical domain superfamily	GO:0005515
AeUmb.PI554389.v2.5U.G0179600	10.0992	5.05882	1.22814	4.1191	3.80359e-05	0.000220492	FAR1 DNA binding domain, FHY3/FAR1 family, MULE transposase domain, PMZ-type, SWIM-type, Zinc finger	GO:0006355, GO:0008270
AeUmb.PI554389.v2.5U.G0179700	163.629	10.5294	1.1944	8.81568	1.18956e-18	5.6136e-17	C-terminal catalytic domain, Papain-like cysteine peptidase superfamily, Ulp1 protease family	GO:0006508, GO:0008234
AeUmb.PI554389.v2.5U.G0180800	181.101	0.682397	0.242821	2.81029	0.00494976	0.0163882	15kDa subunit, C-terminal zinc ribbon, DNA-directed RNA polymerase, DNA-directed RNA polymerase M, DNA-directed RNA polymerase subunit/transcription factor S, M/15kDa subunit, Pol II subunit B9, TFIIS-type, Zinc finger, conserved site	GO:0003676, GO:0003899, GO:0006351, GO:0008270
AeUmb.PI554389.v2.5U.G0181500	126.311	0.829111	0.283696	2.92254	0.00347192	0.0120493
AeUmb.PI554389.v2.5U.G0181800	103.372	-1.06698	0.36493	-2.92379	0.00345798	0.0120099	B3 DNA binding domain, B3 domain-containing protein REM16-like, DNA-binding pseudobarrel domain superfamily	GO:0003677
AeUmb.PI554389.v2.5U.G0181900	480.247	-1.11063	0.23924	-4.64233	3.44497e-06	2.47608e-05	C-terminal domain, CALMODULIN-BINDING PROTEIN60, Calmodulin binding protein, Calmodulin binding protein-like, N-terminal domain, central domain	GO:0005516
AeUmb.PI554389.v2.5U.G0182400	592.728	-0.532276	0.207302	-2.56763	0.0102395	0.0304173
AeUmb.PI554389.v2.5U.G0183800	14.2397	-3.45938	1.13555	-3.04644	0.00231569	0.00847022	Caspase-like domain superfamily, LSD1-type, Peptidase C14, Zinc finger, caspase domain	GO:0004197, GO:0006508
AeUmb.PI554389.v2.5U.G0184100	824.806	-0.953855	0.198897	-4.79572	1.62092e-06	1.24315e-05	N-terminal domain, PC-Esterase, Trichome birefringence-like, Trichome birefringence-like family	GO:0016413, GO:0016740
AeUmb.PI554389.v2.5U.G0184500	13.0597	3.77696	1.20692	3.12942	0.00175152	0.0066373	GroES-like superfamily, Medium-chain dehydrogenase/reductase, N-terminal domain, Oxidoreductase	GO:0016628
AeUmb.PI554389.v2.5U.G0185500	137.798	3.96942	0.652609	6.08238	1.18413e-09	1.55155e-08
AeUmb.PI554389.v2.5U.G0185600	936.779	-1.07165	0.339553	-3.15605	0.00159923	0.00612632
AeUmb.PI554389.v2.5U.G0186500	508.849	0.771638	0.262758	2.93668	0.00331745	0.0115911	C-terminal domain, CALMODULIN-BINDING PROTEIN60, Calmodulin binding protein, Calmodulin binding protein-like, N-terminal domain, central domain	GO:0005516
AeUmb.PI554389.v2.5U.G0186700	29.028	-7.28248	1.63219	-4.4618	8.12755e-06	5.42471e-05	Meiosis-specific protein ASY3-like	GO:0051321
AeUmb.PI554389.v2.5U.G0186800	42.006	-4.09867	1.16269	-3.52516	0.000423222	0.00189984	Meiosis-specific protein ASY3-like, coiled-coil	GO:0051321
AeUmb.PI554389.v2.5U.G0186900	730.454	-0.879131	0.168363	-5.22163	1.77351e-07	1.62658e-06	ATP-dependent 6-phosphofructokinase, Phosphofructokinase domain, Phosphofructokinase superfamily, Pyrophosphate-dependent phosphofructokinase TP0108-type	GO:0003872, GO:0005524, GO:0006002, GO:0006096
AeUmb.PI554389.v2.5U.G0187400	360.576	0.635884	0.225682	2.81761	0.00483819	0.0160804
AeUmb.PI554389.v2.5U.G0187700	14.543	2.77009	1.12061	2.47195	0.013438	0.0382088	Cytochrome b245, EF-Hand 1, EF-hand domain, EF-hand domain pair, FAD-binding 8, FAD-binding domain, Ferredoxin-NADP reductase (FNR), Ferric reductase, Ferric reductase transmembrane component-like domain, NAD binding domain, NADPH oxidase Respiratory burst, Riboflavin synthase-like beta-barrel, calcium-binding site, ferredoxin reductase-type, heavy chain, nucleotide-binding domain	GO:0004601, GO:0005509, GO:0016020, GO:0016491, GO:0050664
AeUmb.PI554389.v2.5U.G0188100	323.616	0.987031	0.231983	4.25475	2.09282e-05	0.000128811
AeUmb.PI554389.v2.5U.G0188800	484.936	-3.27854	0.376722	-8.70281	3.23774e-18	1.43592e-16
AeUmb.PI554389.v2.5U.G0189300	13.7103	5.01216	1.26828	3.95193	7.75241e-05	0.000417359
AeUmb.PI554389.v2.5U.G0189900	500.968	-0.747514	0.201821	-3.70385	0.000212351	0.00103593
AeUmb.PI554389.v2.5U.G0190200	46.258	1.50866	0.425345	3.54692	0.000389767	0.00176541
AeUmb.PI554389.v2.5U.G0190400	1261.2	-0.560952	0.129699	-4.32502	1.5252e-05	9.63888e-05	Aminoacyl-tRNA synthetase, Rossmann-like alpha/beta/alpha sandwich fold, Tryptophan-tRNA ligase, class I, class Ic, conserved site	GO:0000166, GO:0004812, GO:0004830, GO:0005524, GO:0006418, GO:0006436
AeUmb.PI554389.v2.5U.G0190700	113.467	8.95412	1.23721	7.23737	4.57454e-13	9.91818e-12	Deoxyuridine triphosphate nucleotidohydrolase, dUTPase-like, dUTPase-like superfamily	GO:0000287, GO:0004170, GO:0006226, GO:0046081
AeUmb.PI554389.v2.5U.G0190800	86.6915	5.20328	1.03266	5.03871	4.68681e-07	3.98286e-06
AeUmb.PI554389.v2.5U.G0191200	1255.41	-0.391234	0.161522	-2.42217	0.0154282	0.0428943	2,3-bisphosphoglycerate-independent phosphoglycerate mutase, 2,3-bisphosphoglycerate-independent phosphoglycerate mutase superfamily, Alkaline-phosphatase-like, Metalloenzyme, core domain superfamily	GO:0003824, GO:0046537, GO:0046872
AeUmb.PI554389.v2.5U.G0191300	609.588	-0.57138	0.173087	-3.3011	0.000963053	0.00392684	Plus-3 domain, Plus3-like superfamily	GO:0003677
AeUmb.PI554389.v2.5U.G0191500	263.047	0.708323	0.295295	2.39869	0.0164537	0.0452375	N-terminal domain, SNARE, Syntaxin, Syntaxin/epimorphin, Target SNARE coiled-coil homology domain, conserved site	GO:0005484, GO:0006886, GO:0016020, GO:0016192
AeUmb.PI554389.v2.5U.G0192500	855.249	-0.740657	0.183867	-4.02823	5.61992e-05	0.000313276	Fibronectin type III, Fibronectin type III superfamily, Immunoglobulin-like fold, Oberon-like, PHD finger domain, Vernalization insensitive 3-like	GO:0005515, GO:0010048, GO:0040029
AeUmb.PI554389.v2.5U.G0193000	32.0636	2.69784	0.690019	3.9098	9.23733e-05	0.000490223
AeUmb.PI554389.v2.5U.G0193400	1078.7	-0.502479	0.170906	-2.94008	0.00328123	0.0114739	Ankyrin repeat, Ankyrin repeat-containing domain superfamily, Tetratricopeptide repeat, Tetratricopeptide repeat 1, Tetratricopeptide-like helical domain superfamily	GO:0005515
AeUmb.PI554389.v2.5U.G0196000	85.651	-1.47969	0.372298	-3.97447	7.0535e-05	0.000383906	F-box domain, Leucine-rich repeat, Leucine-rich repeat domain superfamily, cysteine-containing subtype	GO:0005515
AeUmb.PI554389.v2.5U.G0196300	13.9607	-7.07698	1.61736	-4.37563	1.21084e-05	7.81739e-05	Leucine-rich repeat, Leucine-rich repeat domain superfamily, cysteine-containing subtype	GO:0005515
AeUmb.PI554389.v2.5U.G0196500	1673.4	9.73907	0.611728	15.9206	4.56112e-57	3.06122e-54
AeUmb.PI554389.v2.5U.G0196700	221.584	0.897448	0.342151	2.62296	0.00871691	0.0264962	Ankyrin repeat, Ankyrin repeat-containing domain superfamily, CCCH-type, RING finger protein Unkempt-like, Zinc finger	GO:0005515, GO:0046872
AeUmb.PI554389.v2.5U.G0197100	3781.77	0.446431	0.133776	3.33714	0.000846446	0.00350918	Amidohydrolase, Bacterial exopeptidase dimerisation domain, IAA-amino acid hydrolase ILR1-like, Peptidase M20, dimerisation domain	GO:0009850, GO:0016787
AeUmb.PI554389.v2.5U.G0198000	124.641	0.902704	0.278688	3.23912	0.00119899	0.00476346
AeUmb.PI554389.v2.5U.G0198600	554.74	-0.749774	0.187906	-3.99015	6.60311e-05	0.000361478	Stress-associated endoplasmic reticulum protein	GO:0005783
AeUmb.PI554389.v2.5U.G0198700	2093.94	0.70952	0.220324	3.22035	0.00128034	0.0050442	MFS transporter superfamily, Major facilitator, Major facilitator superfamily domain, Sugar transporter, Sugar/inositol transporter, conserved site, sugar transporter-like	GO:0016020, GO:0022857, GO:0055085
AeUmb.PI554389.v2.5U.G0198900	194.09	3.26126	0.343499	9.49422	2.2187e-21	1.45672e-19	Stress-associated endoplasmic reticulum protein	GO:0005783
AeUmb.PI554389.v2.5U.G0199200	73.6413	-2.82915	0.560192	-5.05031	4.41086e-07	3.76318e-06	FAD/NAD(P)-binding domain superfamily, Flavin monooxygenase FMO, Flavin monooxygenase-like	GO:0004499, GO:0050660, GO:0050661
AeUmb.PI554389.v2.5U.G0199800	217.841	-0.902325	0.261788	-3.44677	0.000567324	0.00246324	F-box-like domain superfamily	GO:0005515
AeUmb.PI554389.v2.5U.G0200400	40.093	-1.87462	0.658189	-2.84814	0.0043975	0.0147899
AeUmb.PI554389.v2.5U.G0200700	194.104	-0.654	0.22559	-2.89906	0.00374281	0.0128499
AeUmb.PI554389.v2.5U.G0201200	5.94969	-5.08261	1.94784	-2.60936	0.00907123	0.0274381
AeUmb.PI554389.v2.5U.G0201800	975.675	-0.530709	0.211403	-2.51041	0.012059	0.0349092	Ureide permease, plant	GO:0016020, GO:0022857, GO:0071705
AeUmb.PI554389.v2.5U.G0202400	778.664	-0.407448	0.167373	-2.43436	0.014918	0.0417257	WD40-repeat-containing domain superfamily, WD40/YVTN repeat-like-containing domain superfamily	GO:0005515
AeUmb.PI554389.v2.5U.G0202500	361.943	-0.750911	0.171739	-4.37241	1.22884e-05	7.92634e-05	Cell division topological specificity factor MinE, Cell division topological specificity factor MinE superfamily	GO:0032955, GO:0051301
AeUmb.PI554389.v2.5U.G0203600	188.214	5.57676	0.466029	11.9666	5.31898e-33	1.06387e-30
AeUmb.PI554389.v2.5U.G0203800	16.3439	-6.40079	1.59796	-4.00561	6.18578e-05	0.000340669
AeUmb.PI554389.v2.5U.G0204200	524.16	-0.424252	0.150997	-2.80966	0.00495937	0.016411	C-terminal, Initiation factor 2B-like, Initiation factor 2B-related, N-terminal, NagB/RpiA transferase-like, Translation initiation factor eIF-2B subunit alpha	GO:0044237
AeUmb.PI554389.v2.5U.G0204900	911.083	1.10074	0.30082	3.65914	0.000253067	0.00120802	Armadillo-like helical, Armadillo-type fold, Pumilio, Pumilio RNA-binding repeat, Pumilio homology domain, RNA binding domain	GO:0003723
AeUmb.PI554389.v2.5U.G0205100	494.042	-0.680423	0.130881	-5.19877	2.00608e-07	1.81413e-06	Cyclin, Cyclin-like domain, Cyclin-like superfamily, Cyclin/Cyclin-like subunit Ssn8, N-terminal	GO:0006357, GO:0016538
AeUmb.PI554389.v2.5U.G0205200	1247.16	-1.25554	0.120148	-10.4499	1.4668e-25	1.57652e-23
AeUmb.PI554389.v2.5U.G0205800	14.8969	6.8703	1.31531	5.22334	1.75729e-07	1.61318e-06
AeUmb.PI554389.v2.5U.G0205900	20.1542	7.65905	1.24945	6.12992	8.79256e-10	1.1771e-08
AeUmb.PI554389.v2.5U.G0206400	27.75	5.4873	1.11852	4.90588	9.30107e-07	7.48099e-06
AeUmb.PI554389.v2.5U.G0206500	8426.31	-0.512098	0.120107	-4.26367	2.01092e-05	0.000124124	GDP-L-galactose/GDP-D-glucose phosphorylase	GO:0080048
AeUmb.PI554389.v2.5U.G0207300	102.401	9.48517	1.20752	7.85506	3.99571e-15	1.1723e-13
AeUmb.PI554389.v2.5U.G0207400	184.519	1.61526	0.359643	4.49127	7.07986e-06	4.79538e-05
AeUmb.PI554389.v2.5U.G0207500	200.35	0.856406	0.218913	3.91208	9.15055e-05	0.000486162
AeUmb.PI554389.v2.5U.G0208300	1552.19	-0.885406	0.179625	-4.9292	8.25671e-07	6.68729e-06	Exocyst complex component Sec10-like	GO:0005737
AeUmb.PI554389.v2.5U.G0209800	27.5365	-1.57516	0.616557	-2.55477	0.0106257	0.0313855
AeUmb.PI554389.v2.5U.G0209900	62.0592	-1.20431	0.39422	-3.05491	0.00225128	0.00826767
AeUmb.PI554389.v2.5U.G0211000	89.6587	9.2446	1.21542	7.6061	2.82483e-14	7.31695e-13
AeUmb.PI554389.v2.5U.G0212100	763.876	-0.78865	0.133994	-5.88573	3.96306e-09	4.75914e-08	SAGA-associated factor 29, SGF29 tudor-like domain, first Tudor domain, second Tudor domain	GO:0000124
AeUmb.PI554389.v2.5U.G0212600	92.6342	9.80289	1.20747	8.11853	4.71848e-16	1.59583e-14
AeUmb.PI554389.v2.5U.G0213300	98.3033	-1.11031	0.401279	-2.76692	0.00565885	0.0183341	ATP binding site, EF-Hand 1, EF-hand domain, EF-hand domain pair, Protein kinase, Protein kinase domain, Protein kinase-like domain superfamily, Serine/threonine-protein kinase, active site, calcium-binding site	GO:0004672, GO:0005509, GO:0005524, GO:0006468
AeUmb.PI554389.v2.5U.G0213800	148.953	-0.940819	0.275979	-3.40902	0.000651968	0.00278866
AeUmb.PI554389.v2.5U.G0214000	115.561	5.66322	0.766278	7.39055	1.46218e-13	3.41274e-12	Rieske [2Fe-2S] iron-sulphur domain superfamily	GO:0051537
AeUmb.PI554389.v2.5U.G0214100	11.1827	3.68209	0.992751	3.70898	0.000208098	0.00101748
AeUmb.PI554389.v2.5U.G0214200	69.7679	1.64179	0.380643	4.3132	1.60906e-05	0.000101244
AeUmb.PI554389.v2.5U.G0214700	316.696	1.35141	0.219485	6.15721	7.40383e-10	9.98707e-09
AeUmb.PI554389.v2.5U.G0215000	2.72227	5.76929	2.23406	2.58243	0.00981077	0.02934	C-terminal catalytic domain, Papain-like cysteine peptidase superfamily, Ulp1 protease family	GO:0006508, GO:0008234
AeUmb.PI554389.v2.5U.G0215300	18.687	7.50483	1.27959	5.86503	4.49062e-09	5.3333e-08
AeUmb.PI554389.v2.5U.G0215500	193.119	2.30748	0.487744	4.73094	2.23486e-06	1.67072e-05
AeUmb.PI554389.v2.5U.G0215600	42.7467	4.13098	0.527002	7.83864	4.55443e-15	1.31882e-13
AeUmb.PI554389.v2.5U.G0215900	391.327	-1.56868	0.228034	-6.87916	6.02086e-12	1.12596e-10	AAA ATPase, AAA+ ATPase domain, AAA+ lid domain, AAA-type, ATPase, C-terminal, P-loop containing nucleoside triphosphate hydrolase, Spastin/Vps4, conserved site, core	GO:0005524, GO:0016887
AeUmb.PI554389.v2.5U.G0216000	9.76297	3.03362	1.0239	2.96279	0.00304864	0.0107728
AeUmb.PI554389.v2.5U.G0216100	42.3395	8.70441	1.26112	6.90213	5.12293e-12	9.64605e-11
AeUmb.PI554389.v2.5U.G0216300	122.089	-9.86272	1.47688	-6.67809	2.42068e-11	4.11653e-10
AeUmb.PI554389.v2.5U.G0216400	1253.83	-0.421809	0.132175	-3.19129	0.00141639	0.00551453	C2 domain, C2 domain superfamily, PTEN, Protein-tyrosine phosphatase, Protein-tyrosine phosphatase-like, Tensin phosphatase, Tensin-type phosphatase domain, Tyrosine-specific protein phosphatases domain, active site, phosphatase domain	GO:0016311, GO:0016791
AeUmb.PI554389.v2.5U.G0216700	7273.31	-0.500353	0.142426	-3.51307	0.000442957	0.00197821	Chaperone J-domain superfamily, DnaJ domain, NAD(P)H-quinone oxidoreductase subunit U, chloroplastic	GO:0009535, GO:0010598
AeUmb.PI554389.v2.5U.G0216800	115.879	9.91882	1.1944	8.30447	1.00269e-16	3.73866e-15
AeUmb.PI554389.v2.5U.G0217100	861.499	-0.592556	0.187819	-3.15493	0.00160535	0.00614663
AeUmb.PI554389.v2.5U.G0217300	458.882	0.903463	0.165753	5.45067	5.01801e-08	5.04507e-07	Protein of unknown function DUF92, TMEM19	GO:0016020
AeUmb.PI554389.v2.5U.G0217400	4144.93	1.45981	0.0889205	16.417	1.44546e-60	1.17989e-57	DCN1-like, Defective-in-cullin neddylation protein, PONY binding domain, Potentiating neddylation domain, UBA-like superfamily	GO:0005515
AeUmb.PI554389.v2.5U.G0217500	749.745	-0.528729	0.183469	-2.88184	0.00395362	0.0134781	CCR4-NOT transcription complex subunit 11	GO:0030014
AeUmb.PI554389.v2.5U.G0217600	300.349	-0.554244	0.191328	-2.89682	0.00376963	0.0129302	Oxysterol-binding protein, Oxysterol-binding protein superfamily, PH-like domain superfamily, Pleckstrin homology domain	GO:0008289
AeUmb.PI554389.v2.5U.G0217700	1420.68	1.28473	0.169278	7.58947	3.21208e-14	8.2213e-13	C-terminal, Mog1/PsbP, PsbP, Twin-arginine translocation pathway, alpha/beta/alpha sandwich, signal sequence	GO:0005509, GO:0009523, GO:0009654, GO:0015979, GO:0019898
AeUmb.PI554389.v2.5U.G0217800	427.624	-0.450905	0.190406	-2.36812	0.0178785	0.0485189
AeUmb.PI554389.v2.5U.G0217900	1695.38	-0.345649	0.0956644	-3.61314	0.000302514	0.0014141	CCCH-type, CCCH-type superfamily, Zinc finger	GO:0046872
AeUmb.PI554389.v2.5U.G0219500	3456.39	-1.17266	0.124133	-9.4468	3.49363e-21	2.25941e-19	Histone deacetylase class II, Histone deacetylase domain, Histone deacetylase domain superfamily, Histone deacetylase family, Ureohydrolase domain superfamily, eukaryotic-type	GO:0000118, GO:0004407, GO:0006325, GO:0016575
AeUmb.PI554389.v2.5U.G0219900	68.6788	-9.78326	1.46764	-6.66598	2.62913e-11	4.44349e-10
AeUmb.PI554389.v2.5U.G0220400	4748.28	0.705855	0.17121	4.12275	3.74376e-05	0.000217357	3(2),5 -bisphosphate nucleotidase HAL2, Inositol monophosphatase, Inositol monophosphatase-like, conserved site, metal-binding site	GO:0006790, GO:0008441, GO:0046854
AeUmb.PI554389.v2.5U.G0220500	2370.48	-0.560558	0.110103	-5.09119	3.55823e-07	3.08898e-06	Ataxin-2, C-terminal, La domain containing protein, La-type HTH domain, Lupus La protein, Nucleotide-binding alpha-beta plait domain superfamily, RNA recognition motif domain, RNA-binding domain superfamily, Winged helix DNA-binding domain superfamily, Winged helix-like DNA-binding domain superfamily	GO:0003676, GO:0003723, GO:0005634, GO:0006396, GO:1990904
AeUmb.PI554389.v2.5U.G0220600	25.4726	7.78798	1.28515	6.05997	1.36145e-09	1.77006e-08
AeUmb.PI554389.v2.5U.G0221000	569.197	-0.598284	0.167849	-3.56442	0.000364656	0.00166264	Asp/Orn-binding domain, Aspartate carbamoyltransferase, Aspartate/ornithine carbamoyltransferase, Aspartate/ornithine carbamoyltransferase superfamily, carbamoyl-P binding	GO:0004070, GO:0006207, GO:0006520, GO:0016597, GO:0016743
AeUmb.PI554389.v2.5U.G0221100	604.001	-0.426004	0.141888	-3.00239	0.00267868	0.00962381	Basic-leucine zipper domain, Basic-leucine zipper domain superfamily, G-box binding factor 1-like, G-box binding protein, G-box-binding factor-like, bZIP domain, multifunctional mosaic region, plant	GO:0003700, GO:0006355, GO:0043565
AeUmb.PI554389.v2.5U.G0221200	344.886	1.06364	0.228802	4.64873	3.33985e-06	2.41201e-05	Protein SUPPRESSOR OF GENE SILENCING 3, XS domain, XS domain superfamily, Zinc finger-XS domain	GO:0031047, GO:0051607
AeUmb.PI554389.v2.5U.G0221700	2290.42	-0.645331	0.17946	-3.59595	0.000323204	0.00149669
AeUmb.PI554389.v2.5U.G0222300	307.011	0.858528	0.234837	3.65584	0.000256342	0.0012223
AeUmb.PI554389.v2.5U.G0222500	2259.12	-0.440123	0.125221	-3.51477	0.000440129	0.00196813	Outer envelope pore protein 37-like	GO:0005216, GO:0006812
AeUmb.PI554389.v2.5U.G0222700	108.303	1.28494	0.406518	3.16085	0.00157309	0.00603783	C-terminal, Large ribosomal subunit protein uL18, Large ribosomal subunit protein uL18 eukaryotic/archaeal, eukaryotes	GO:0003735, GO:0005840, GO:0006412, GO:0008097
AeUmb.PI554389.v2.5U.G0224100	578.615	1.54488	0.285764	5.40613	6.44015e-08	6.36679e-07	Dynamin, Dynamin-type guanine nucleotide-binding (G) domain, GTPase domain, N-terminal, P-loop containing nucleoside triphosphate hydrolase	GO:0003924, GO:0005525
AeUmb.PI554389.v2.5U.G0224400	1376.44	1.18813	0.275809	4.3078	1.64889e-05	0.000103469
AeUmb.PI554389.v2.5U.G0225400	35.8931	3.93189	0.635691	6.18523	6.20127e-10	8.48621e-09
AeUmb.PI554389.v2.5U.G0225700	20.3385	6.05478	1.10121	5.49829	3.83482e-08	3.92076e-07
AeUmb.PI554389.v2.5U.G0225800	229.681	-11.9969	1.52285	-7.87794	3.32835e-15	9.93308e-14
AeUmb.PI554389.v2.5U.G0226000	224.996	-11.0286	1.46379	-7.53427	4.91077e-14	1.22473e-12	C-terminal, Fe-S cluster assembly domain superfamily, NIF system FeS cluster assembly, NifU	GO:0005506, GO:0016226, GO:0051536
AeUmb.PI554389.v2.5U.G0226900	621.775	-0.83047	0.177109	-4.68904	2.74494e-06	2.01317e-05	Class I peroxidase, Haem peroxidase, Haem peroxidase superfamily, Heme-binding peroxidase Ccp1-like, Peroxidases heam-ligand binding site	GO:0004601, GO:0006979, GO:0020037, GO:0034599
AeUmb.PI554389.v2.5U.G0227400	873.591	0.482861	0.149976	3.21959	0.00128375	0.00505434	ATP-binding domain, ATP-dependent RNA helicase DEAD-box, C-terminal, DEAD/DEAH box helicase domain, Helicase, Helicase superfamily 1/2, P-loop containing nucleoside triphosphate hydrolase, conserved site	GO:0003676, GO:0005524
AeUmb.PI554389.v2.5U.G0227600	1820.2	0.529652	0.136218	3.88827	0.000100961	0.000530854
AeUmb.PI554389.v2.5U.G0228400	1135.54	-1.23394	0.115326	-10.6995	1.02298e-26	1.23584e-24	C-terminal, Chaperone DnaJ, Chaperone J-domain superfamily, DnaJ domain, HSP40/DnaJ peptide-binding, Heat shock protein DnaJ, conserved site, cysteine-rich domain, cysteine-rich domain superfamily	GO:0005524, GO:0006457, GO:0009408, GO:0031072, GO:0051082
AeUmb.PI554389.v2.5U.G0230400	492.892	-0.471043	0.150552	-3.12877	0.00175539	0.0066478	3)-fucosyltransferase/alpha-(1, 4)-fucosyltransferase, Alpha-(1, C-terminal domain superfamily, GT10-like, Glycosyl transferase family 10, plant	GO:0006486, GO:0008417, GO:0016020
AeUmb.PI554389.v2.5U.G0230500	6.85025	5.52426	1.84214	2.99882	0.00271024	0.00971567
AeUmb.PI554389.v2.5U.G0230600	81.2365	-3.64074	1.06747	-3.41064	0.000648107	0.0027749
AeUmb.PI554389.v2.5U.G0230800	134.588	0.927662	0.314023	2.95412	0.00313565	0.0110352	TCP, Transcription factor, Transcription factor TCP subgroup	GO:0003700
AeUmb.PI554389.v2.5U.G0231200	61.6839	3.69629	0.507865	7.2781	3.38562e-13	7.51305e-12
AeUmb.PI554389.v2.5U.G0231400	444.988	11.9743	1.18635	10.0935	5.90432e-24	5.30721e-22	Argonaute, Argonaute linker 2 domain, Argonaute-like, Mid domain, N-terminal, PAZ domain, PAZ domain superfamily, PIWI domain, Piwi domain, Protein argonaute, Ribonuclease H superfamily, Ribonuclease H-like superfamily, linker 1 domain	GO:0003676, GO:0003723, GO:0005515
AeUmb.PI554389.v2.5U.G0231500	42.4299	5.11436	0.721834	7.08523	1.38813e-12	2.8404e-11	GRF-type, Zinc finger	GO:0008270
AeUmb.PI554389.v2.5U.G0231600	74.9442	1.51625	0.452293	3.35236	0.000801253	0.00334108
AeUmb.PI554389.v2.5U.G0231900	289.767	4.1225	0.279495	14.7499	3.08314e-49	1.36937e-46
AeUmb.PI554389.v2.5U.G0232000	48.5019	8.57916	1.2047	7.1214	1.06836e-12	2.21952e-11
AeUmb.PI554389.v2.5U.G0233000	347.624	9.79106	1.03543	9.45606	3.19763e-21	2.07688e-19	Argonaute, Argonaute linker 2 domain, Argonaute-like, Mid domain, N-terminal, PAZ domain, PAZ domain superfamily, PIWI domain, Piwi domain, Protein argonaute, Ribonuclease H superfamily, Ribonuclease H-like superfamily, linker 1 domain	GO:0003676, GO:0003723, GO:0005515
AeUmb.PI554389.v2.5U.G0234100	365.47	11.6568	1.18739	9.81709	9.50499e-23	7.30457e-21
AeUmb.PI554389.v2.5U.G0234400	585.145	0.576398	0.1469	3.92374	8.71848e-05	0.000465057	Nucleotidyltransferase superfamily, Poly A polymerase, RNA and SrmB- binding domain, head domain, tRNA nucleotidyltransferase/poly(A) polymerase	GO:0003723, GO:0006396, GO:0016779
AeUmb.PI554389.v2.5U.G0234700	767.914	0.518787	0.162857	3.18554	0.00144482	0.00560305	C-terminal, F-box domain, F-box-like domain superfamily, Tubby, Tubby-like, conserved site	GO:0005515
AeUmb.PI554389.v2.5U.G0234800	455.31	-1.7568	0.198309	-8.85891	8.08035e-19	3.91094e-17	Acyl-CoA N-acyltransferase, GNAT domain	GO:0016747
AeUmb.PI554389.v2.5U.G0235400	8.07143	-6.85605	1.92242	-3.56637	0.000361967	0.00165113
AeUmb.PI554389.v2.5U.G0235600	134.665	8.34834	1.07727	7.74956	9.2214e-15	2.55979e-13	C-terminal, PsbP	GO:0005509, GO:0009523, GO:0009654, GO:0015979, GO:0019898
AeUmb.PI554389.v2.5U.G0235900	1536.9	-0.410779	0.152597	-2.69193	0.00710397	0.0222821	G-protein beta WD-40 repeat, WD40 repeat, WD40-repeat-containing domain superfamily, WD40/YVTN repeat-like-containing domain superfamily, WDR48/Bun107, conserved site	GO:0005515
AeUmb.PI554389.v2.5U.G0236000	20.74	7.2616	1.2556	5.78336	7.32243e-09	8.3865e-08	Ankyrin repeat, Ankyrin repeat-containing domain superfamily	GO:0005515
AeUmb.PI554389.v2.5U.G0236100	2554.15	-0.627899	0.169191	-3.71119	0.000206285	0.00100894	Mediator of RNA polymerase II transcription subunit 26c-like, N-terminal, TFIIS/CRSP70, TFIIS/LEDGF domain superfamily, Transcription elongation factor, Transcription factor IIS, sub-type	GO:0005634
AeUmb.PI554389.v2.5U.G0237000	1235.7	-0.306313	0.121039	-2.5307	0.0113834	0.033269	Calcineurin B-like, EF-hand domain, EF-hand domain pair	GO:0005509, GO:0019722, GO:0019900
AeUmb.PI554389.v2.5U.G0237100	178.43	0.753825	0.210536	3.58051	0.000342926	0.00157617
AeUmb.PI554389.v2.5U.G0237300	1153.1	-0.309064	0.114931	-2.68912	0.00716401	0.0224401	ACT domain, ACT-like domain, Protein kinase domain, Protein kinase-like domain superfamily, Serine-threonine/tyrosine-protein kinase, Serine/threonine-protein kinase, active site, catalytic domain	GO:0004672, GO:0005524, GO:0006468
AeUmb.PI554389.v2.5U.G0237400	1273.5	-0.394879	0.123144	-3.20666	0.00134287	0.00526447	Cytochrome b-c1 complex, Ubiquinol-cytochrome C reductase hinge domain, Ubiquinol-cytochrome C reductase hinge domain superfamily, subunit 6	GO:0005750, GO:0006122
AeUmb.PI554389.v2.5U.G0237700	341.014	-0.750316	0.273324	-2.74515	0.00604834	0.019427	Myc-type, Transcription factor LHW-like, Transcription factor MYC/MYB N-terminal, basic helix-loop-helix (bHLH) domain	GO:0003700, GO:0006355, GO:0046983
AeUmb.PI554389.v2.5U.G0238000	63.0644	-1.23195	0.401564	-3.06789	0.00215578	0.00795563	C-terminal, Cullin repeat-like-containing domain superfamily, Exocyst complex component Exo70, Exocyst complex subunit Exo70	GO:0000145, GO:0005546, GO:0006887
AeUmb.PI554389.v2.5U.G0238600	146.768	1.57946	0.273828	5.76807	8.01864e-09	9.15265e-08
AeUmb.PI554389.v2.5U.G0238900	3.54211	4.94851	1.9337	2.55908	0.0104949	0.0310556
AeUmb.PI554389.v2.5U.G0239100	1139.7	-1.12882	0.166511	-6.77924	1.20812e-11	2.15393e-10
AeUmb.PI554389.v2.5U.G0239600	304.903	-1.39833	0.32343	-4.32343	1.53624e-05	9.70049e-05	Cytokinin-induced F-Box protein AT3G44326-like, F-box domain, F-box-like domain superfamily	GO:0005515
AeUmb.PI554389.v2.5U.G0239700	9.93858	-7.44521	1.66029	-4.48429	7.31567e-06	4.93738e-05
AeUmb.PI554389.v2.5U.G0239800	350.11	1.00443	0.187886	5.34596	8.99403e-08	8.64262e-07
AeUmb.PI554389.v2.5U.G0239900	19.8511	6.98546	1.25368	5.57197	2.51869e-08	2.65606e-07
AeUmb.PI554389.v2.5U.G0241500	60.4731	1.39542	0.343227	4.0656	4.79098e-05	0.000271171
AeUmb.PI554389.v2.5U.G0243700	9.61576	-6.6585	2.35445	-2.82805	0.00468328	0.015612	ApaH type, Calcineurin-like phosphoesterase domain, Iron/zinc purple acid phosphatase-like C-terminal domain, Metallo-dependent phosphatase-like, N-terminal, Purple acid phosphatase, Purple acid phosphatase-like, metallophosphatase domain	GO:0003993, GO:0016787, GO:0046872
AeUmb.PI554389.v2.5U.G0243800	9.04406	-6.33467	2.089	-3.0324	0.0024262	0.00882633
AeUmb.PI554389.v2.5U.G0244500	809	4.5405	1.15798	3.92106	8.81602e-05	0.000469597	Cytochrome P450, Cytochrome P450 superfamily	GO:0004497, GO:0005506, GO:0016705, GO:0020037
AeUmb.PI554389.v2.5U.G0245800	345.361	1.19028	0.326253	3.64834	0.000263943	0.00125478	Phytosulfokine	GO:0005576, GO:0008083, GO:0008283
AeUmb.PI554389.v2.5U.G0245900	42.1442	1.87714	0.500405	3.75124	0.000175965	0.000874812	AT-hook motif nuclear-localized protein, PPC domain	GO:0003680
AeUmb.PI554389.v2.5U.G0248000	202.564	-1.74704	0.276339	-6.3221	2.58038e-10	3.76486e-09	N-terminal domain, PC-Esterase, Trichome birefringence-like, Trichome birefringence-like family	GO:0016413, GO:0016740
AeUmb.PI554389.v2.5U.G0248500	167.762	0.989425	0.324464	3.04942	0.00229287	0.00839488
AeUmb.PI554389.v2.5U.G0249000	103.8	9.90943	1.19916	8.26361	1.41336e-16	5.14914e-15
AeUmb.PI554389.v2.5U.G0249200	2743.66	-0.476909	0.186619	-2.55552	0.010603	0.0313254	AMP-binding, AMP-binding enzyme, AMP-dependent synthetase/ligase domain, ANL, C-terminal domain, Long-chain fatty acid CoA synthetase, N-terminal domain, conserved site, eukaryotic	GO:0004467, GO:0006631
AeUmb.PI554389.v2.5U.G0249300	83.4204	5.47652	0.533392	10.2673	9.8888e-25	9.76019e-23	ATP-binding domain, C-terminal, DNA recombination and repair protein, DNA recombination and repair protein Rad51-like, DNA recombination and repair protein RecA, DNA recombination and repair protein RecA-like, DNA repair Rad51/transcription factor NusA, Meiotic recombination protein Dmc1, P-loop containing nucleoside triphosphate hydrolase, RecA-like, alpha-helical, monomer-monomer interface	GO:0000150, GO:0000166, GO:0003677, GO:0005524, GO:0005634, GO:0006259, GO:0006281, GO:0007131, GO:0008094, GO:0140664
AeUmb.PI554389.v2.5U.G0249400	465.436	-1.41018	0.322336	-4.37486	1.21512e-05	7.84335e-05	Ubiquitin-like domain, Ubiquitin-like domain superfamily, Ubiquitin-like modifier Hub1/Ubl5	GO:0005515, GO:0036211
AeUmb.PI554389.v2.5U.G0249600	934.623	1.5894	0.478324	3.32286	0.000890994	0.00366619	UDP-glucuronosyl/UDP-glucosyltransferase	GO:0008194
AeUmb.PI554389.v2.5U.G0250500	40.4153	8.36493	1.22771	6.81346	9.52817e-12	1.72623e-10
AeUmb.PI554389.v2.5U.G0250600	310.041	8.51301	0.741449	11.4816	1.63259e-30	2.67976e-28
AeUmb.PI554389.v2.5U.G0251600	25.8624	-2.0191	0.701821	-2.87695	0.00401541	0.0136738	AATF leucine zipper-containing domain, Apoptosis-antagonizing transcription factor, C-terminal, Protein AATF/Bfr2	GO:0005634
AeUmb.PI554389.v2.5U.G0251900	2457.56	-0.42954	0.121082	-3.54752	0.000388879	0.00176208	Cytochrome P450, Cytochrome P450 superfamily, E-class, conserved site, group I	GO:0004497, GO:0005506, GO:0016705, GO:0020037
AeUmb.PI554389.v2.5U.G0252200	4094.28	-0.628672	0.237924	-2.64232	0.0082339	0.0252621	2-isopropylmalate synthase, 2-isopropylmalate synthase LeuA, Aldolase-type TIM barrel, Alpha-isopropylmalate/homocitrate synthase, Pyruvate carboxyltransferase, allosteric (dimerisation) domain, allosteric (dimerisation) domain superfamily, bacterial-type, conserved site	GO:0003824, GO:0003852, GO:0009098, GO:0019752, GO:0046912
AeUmb.PI554389.v2.5U.G0252500	63.4343	8.77622	1.20611	7.27645	3.42729e-13	7.58878e-12
AeUmb.PI554389.v2.5U.G0252700	42.9138	-1.24588	0.459696	-2.71022	0.00672386	0.0212465
AeUmb.PI554389.v2.5U.G0252800	1407.71	-0.614664	0.125626	-4.8928	9.94109e-07	7.94078e-06	C3HC4 RING-type, RING-finger protein MAG2/RNF10, RING-type, RING/FYVE/PHD-type, Zinc finger, conserved site	GO:0046872
AeUmb.PI554389.v2.5U.G0252900	185.92	1.30069	0.328778	3.95613	7.61748e-05	0.0004109
AeUmb.PI554389.v2.5U.G0253000	66.4512	1.12811	0.434066	2.59894	0.00935118	0.0281355
AeUmb.PI554389.v2.5U.G0253200	58.9817	-8.9657	1.48884	-6.02193	1.72346e-09	2.19443e-08	EF-Hand 1, EF-hand domain, EF-hand domain pair, calcium-binding site	GO:0005509
AeUmb.PI554389.v2.5U.G0253300	407.92	-0.436802	0.173492	-2.5177	0.0118123	0.0343299
AeUmb.PI554389.v2.5U.G0253500	1032.61	-0.527261	0.178844	-2.94816	0.00319675	0.0112161	TAP42/TAP46-like superfamily, TAP46-like protein	GO:0009966
AeUmb.PI554389.v2.5U.G0254200	1208.54	0.445626	0.166066	2.68342	0.00728726	0.0227765
AeUmb.PI554389.v2.5U.G0255900	105.352	-1.16146	0.398816	-2.91226	0.00358824	0.0123783	F-box domain, F-box-like domain superfamily, Kelch repeat type 1, Kelch-type beta propeller	GO:0005515
AeUmb.PI554389.v2.5U.G0256200	82.9123	1.10069	0.440355	2.49956	0.0124348	0.0358115	Histidine phosphatase superfamily, Phosphoglycerate/bisphosphoglycerate mutase, active site, clade-1	GO:0003824
AeUmb.PI554389.v2.5U.G0256600	2583	-0.735526	0.136149	-5.40237	6.57651e-08	6.49297e-07	Aldolase-type TIM barrel, HMG-CoA lyase, Pyruvate carboxyltransferase	GO:0003824, GO:0016833
AeUmb.PI554389.v2.5U.G0256700	2153.11	-0.430087	0.129637	-3.31762	0.00090789	0.00372758	Aminoacyl-tRNA synthetase, Class I and II aminoacyl-tRNA synthetase, Class II Aminoacyl-tRNA synthetase/Biotinyl protein ligase (BPL) and lipoyl protein ligase (LPL), N-terminal, N-terminal domain superfamily, Serine-tRNA ligase, Serine-tRNA ligase catalytic core domain, Serine-tRNA synthetase, class II, class II (G/ P/ S/T), tRNA-binding arm, type1	GO:0000166, GO:0004812, GO:0004828, GO:0005524, GO:0006418, GO:0006434
AeUmb.PI554389.v2.5U.G0256900	45.7798	8.30779	1.23345	6.7354	1.63476e-11	2.84734e-10
AeUmb.PI554389.v2.5U.G0257200	251.221	-0.585426	0.198594	-2.94785	0.00319987	0.0112258	Dual specificity phosphatase, Dual specificity protein phosphatase 12, Dual specificity protein phosphatase domain, Protein-tyrosine phosphatase, Protein-tyrosine phosphatase-like, Tyrosine-specific protein phosphatases domain, active site, catalytic domain	GO:0006470, GO:0008138, GO:0016311, GO:0016791
AeUmb.PI554389.v2.5U.G0257500	11.1026	-6.90612	1.64952	-4.18675	2.82974e-05	0.000168867
AeUmb.PI554389.v2.5U.G0257600	33.4103	-2.1737	0.728849	-2.98238	0.0028602	0.0101952	MFS transporter superfamily, Major facilitator superfamily, Major facilitator superfamily domain	GO:0022857, GO:0055085
AeUmb.PI554389.v2.5U.G0257700	1259.57	0.49201	0.197664	2.48912	0.0128059	0.0366949	MFS transporter superfamily, Major facilitator superfamily, Major facilitator superfamily domain	GO:0022857, GO:0055085
AeUmb.PI554389.v2.5U.G0257800	16.8231	1.63733	0.613753	2.66773	0.00763654	0.0236917
AeUmb.PI554389.v2.5U.G0258300	16.2098	7.18822	1.2846	5.5957	2.19735e-08	2.33349e-07
AeUmb.PI554389.v2.5U.G0258400	13.682	6.71704	1.28394	5.23158	1.68066e-07	1.54848e-06
AeUmb.PI554389.v2.5U.G0258500	107.836	-0.801097	0.257615	-3.10967	0.00187296	0.00702347	DHHC domain, Palmitoyltransferase	GO:0016409
AeUmb.PI554389.v2.5U.G0258600	302.098	1.33637	0.205797	6.49364	8.37892e-11	1.31e-09
AeUmb.PI554389.v2.5U.G0259000	82.7707	2.27709	0.55884	4.07466	4.60808e-05	0.0002618	Tetratricopeptide-like helical domain superfamily	GO:0005515
AeUmb.PI554389.v2.5U.G0259100	1377.91	0.468212	0.187944	2.49123	0.0127301	0.0365298	Armadillo-like helical, C-terminal domain, Exportin-1/5, Exportin-5	GO:0005049, GO:0006611
AeUmb.PI554389.v2.5U.G0259200	11.2897	4.11807	1.55762	2.64382	0.00819754	0.0251684
AeUmb.PI554389.v2.5U.G0259600	183.481	10.5356	1.19693	8.80219	1.34166e-18	6.2823e-17
AeUmb.PI554389.v2.5U.G0259900	380.158	3.19745	0.228174	14.0133	1.29345e-44	4.70659e-42
AeUmb.PI554389.v2.5U.G0260500	591.71	-2.50565	0.210945	-11.8782	1.53574e-32	2.97323e-30	Aladin, Anaphase-promoting complex subunit 4-like, WD40 domain, WD40 repeat, WD40-repeat-containing domain superfamily, WD40/YVTN repeat-like-containing domain superfamily	GO:0005515
AeUmb.PI554389.v2.5U.G0260600	2100.29	-0.274091	0.078458	-3.49348	0.000476773	0.00210827	Alpha-L-arabinofuranosidase, C-terminal, Glycoside hydrolase superfamily, Glycosyl hydrolase, all-beta	GO:0046373, GO:0046556
AeUmb.PI554389.v2.5U.G0261100	299.025	0.588173	0.204707	2.87324	0.00406288	0.0138137
AeUmb.PI554389.v2.5U.G0262000	194.397	-3.8166	0.532071	-7.17309	7.33213e-13	1.55509e-11
AeUmb.PI554389.v2.5U.G0262500	144.406	7.22316	0.759629	9.5088	1.92876e-21	1.27467e-19
AeUmb.PI554389.v2.5U.G0262900	496.722	-0.388061	0.152124	-2.55096	0.0107427	0.0316815	Basic-leucine zipper domain, Basic-leucine zipper domain superfamily, Plant bZIP transcription factors	GO:0003700, GO:0006355, GO:0045893
AeUmb.PI554389.v2.5U.G0263200	226.457	1.04835	0.284292	3.68759	0.000226391	0.00109557
AeUmb.PI554389.v2.5U.G0263400	73.8438	8.94725	1.20498	7.42521	1.12598e-13	2.67981e-12
AeUmb.PI554389.v2.5U.G0263800	70.9262	-2.67676	0.430863	-6.21256	5.21291e-10	7.22203e-09
AeUmb.PI554389.v2.5U.G0264000	213.734	-1.2911	0.313718	-4.11548	3.86378e-05	0.000223466	Multi antimicrobial extrusion protein, Multidrug and toxic compound extrusion family, eukaryotic	GO:0015297, GO:0016020, GO:0042910, GO:0055085, GO:1990961
AeUmb.PI554389.v2.5U.G0264800	132.434	-2.8304	0.36221	-7.81424	5.5297e-15	1.58301e-13	Mad3/Bub1 homology region 1, Mitotic spindle checkpoint protein Bub1/Mad3	GO:0007094
AeUmb.PI554389.v2.5U.G0265300	73.3483	-1.42256	0.375054	-3.79294	0.000148872	0.000753029	F-box domain, F-box-like domain superfamily, Leucine-rich repeat domain superfamily	GO:0005515
AeUmb.PI554389.v2.5U.G0266900	413.006	-2.05783	0.331048	-6.2161	5.09676e-10	7.07409e-09	C-terminal, C-terminal alpha helical domain, C-terminal domain superfamily, C-terminal-like, Glutathione S-transferase, Glutathione S-transferase Omega/Tau-like, Glutathione S-transferases Tau, N-terminal, Thioredoxin-like superfamily, plant	GO:0004364, GO:0006749
AeUmb.PI554389.v2.5U.G0267000	1612.46	-0.618687	0.144203	-4.29039	1.78357e-05	0.000111296	Beta-galactosidase, D-galactoside/L-rhamnose binding SUEL lectin domain, D-galactoside/L-rhamnose binding SUEL lectin domain superfamily, Galactose-binding-like domain superfamily, Glycoside hydrolase, Glycoside hydrolase 35, Glycoside hydrolase superfamily, beta-sandwich domain, catalytic domain, conserved site, family 35	GO:0004553, GO:0005975, GO:0030246
AeUmb.PI554389.v2.5U.G0267200	72.0977	1.83077	0.338335	5.41111	6.26343e-08	6.19817e-07
AeUmb.PI554389.v2.5U.G0269200	40.8749	-1.72361	0.420322	-4.10069	4.11924e-05	0.000236519
AeUmb.PI554389.v2.5U.G0269800	26.9284	-1.33601	0.566804	-2.35709	0.018419	0.0497131
AeUmb.PI554389.v2.5U.G0269900	649.293	-0.748714	0.210546	-3.55606	0.000376459	0.00171129	Cytochrome P450, Cytochrome P450 superfamily, E-class, conserved site, group I	GO:0004497, GO:0005506, GO:0016705, GO:0020037
AeUmb.PI554389.v2.5U.G0270600	58.3931	8.92798	1.22943	7.26191	3.81657e-13	8.35277e-12
AeUmb.PI554389.v2.5U.G0270900	44.5697	2.66041	0.689095	3.86073	0.000113047	0.000587144	Glycoside hydrolase, Glycoside hydrolase superfamily, Mannan endo-1,4-beta-mannosidase-like, conserved site, family 5	GO:0004553, GO:0005975, GO:0071704
AeUmb.PI554389.v2.5U.G0271000	28.8451	2.16949	0.896881	2.41893	0.0155664	0.0432231	WRKY domain, WRKY domain superfamily, WRKY transcription factor, plant	GO:0003700, GO:0006355, GO:0043565
AeUmb.PI554389.v2.5U.G0271400	3267.77	-1.01797	0.25308	-4.02231	5.763e-05	0.00032007	3-layer sandwich, Chalcone isomerase, Chalcone isomerase superfamily, Chalcone--flavonone isomerase 3-like, orthogonal bundle domain superfamily	GO:0016872
AeUmb.PI554389.v2.5U.G0271900	6620.47	-0.831337	0.157369	-5.28271	1.27285e-07	1.19165e-06	Protein kinase domain, Protein kinase-like domain superfamily, Serine/threonine-protein kinase, active site	GO:0004672, GO:0005524, GO:0006468
AeUmb.PI554389.v2.5U.G0272400	3001.6	-0.761588	0.235551	-3.23321	0.00122406	0.00485095	ATP binding site, NAF domain, NAF/FISL domain, Protein kinase, Protein kinase domain, Protein kinase-like domain superfamily, Serine/threonine-protein kinase, active site	GO:0004672, GO:0005524, GO:0006468, GO:0007165
AeUmb.PI554389.v2.5U.G0273000	1116.52	0.838817	0.232532	3.60733	0.000309367	0.00144034	Dual specificity phosphatase, Dual specificity protein phosphatase domain, Laforin-like, Protein-tyrosine phosphatase-like, Tyrosine-specific protein phosphatases domain, catalytic domain, dual specificity phosphatase domain	GO:0006470, GO:0008138, GO:0016311, GO:0016791, GO:0019203
AeUmb.PI554389.v2.5U.G0273200	220.664	-10.737	1.46463	-7.3309	2.2861e-13	5.16415e-12	Saposin B type, Saposin B type domain, Saposin-like, Saposin-like type B, region 1, region 2	GO:0006629
AeUmb.PI554389.v2.5U.G0273300	142.907	2.12832	0.381239	5.58263	2.36906e-08	2.50439e-07
AeUmb.PI554389.v2.5U.G0273500	4.9583	3.26906	1.34712	2.42671	0.0152365	0.0424723
AeUmb.PI554389.v2.5U.G0273700	50.0384	1.50161	0.400302	3.75119	0.000175996	0.000874825	C-terminal, Molybdenum cofactor sulfurase, middle domain	GO:0003824, GO:0030151, GO:0030170
AeUmb.PI554389.v2.5U.G0274300	355.717	-1.74127	0.230219	-7.56355	3.9223e-14	9.91307e-13	AMP-binding, AMP-dependent synthetase/ligase domain, ANL, Long-chain fatty acid CoA synthetase, N-terminal domain, conserved site, eukaryotic	GO:0004467, GO:0006631
AeUmb.PI554389.v2.5U.G0274600	15.0779	6.76126	1.2928	5.22993	1.69578e-07	1.56147e-06
AeUmb.PI554389.v2.5U.G0274700	9.71928	6.32521	1.45431	4.34929	1.36578e-05	8.71527e-05
AeUmb.PI554389.v2.5U.G0275300	47.9261	-3.46309	0.714248	-4.84858	1.24351e-06	9.73722e-06	Histone-fold, Transcription initiation factor IID, subunit 13	GO:0006366, GO:0046982
AeUmb.PI554389.v2.5U.G0275700	22.8936	2.57773	0.980587	2.62876	0.00856958	0.0261303	Pentatricopeptide repeat, Tetratricopeptide-like helical domain superfamily	GO:0005515
AeUmb.PI554389.v2.5U.G0277600	44.3293	8.2119	1.21798	6.74224	1.55964e-11	2.72594e-10
AeUmb.PI554389.v2.5U.G0277700	5.87282	4.82699	1.59776	3.02109	0.00251864	0.00911869	Aminoacyl-tRNA synthetase, OB-fold, OB-fold superfamily, SNase-like, Staphylococcal nuclease (SNase-like), anticodon-binding, class Ia	GO:0000166, GO:0004812, GO:0005524, GO:0006418
AeUmb.PI554389.v2.5U.G0278200	136.413	8.94957	1.20571	7.42267	1.14786e-13	2.72329e-12
AeUmb.PI554389.v2.5U.G0278600	434.687	1.74292	0.20591	8.46444	2.57379e-17	1.02281e-15
AeUmb.PI554389.v2.5U.G0279200	2386.69	1.1203	0.206251	5.43172	5.58121e-08	5.56315e-07
AeUmb.PI554389.v2.5U.G0280300	11996.5	3.54172	0.550796	6.43018	1.27449e-10	1.93331e-09	Ferritin, Ferritin-like, Ferritin-like diiron domain, Ferritin-like superfamily, Ferritin/DPS protein domain, conserved site	GO:0006826, GO:0006879, GO:0008199
AeUmb.PI554389.v2.5U.G0281100	601.123	2.2898	0.202689	11.2971	1.3557e-29	1.99731e-27	Armadillo-like helical, C-terminal domain, Exportin-1/5, Exportin-5	GO:0005049, GO:0006611
AeUmb.PI554389.v2.5U.G0281300	14.9187	7.00726	1.40493	4.98763	6.11257e-07	5.08993e-06
AeUmb.PI554389.v2.5U.G0282400	302.88	3.74321	0.519505	7.20534	5.79002e-13	1.24109e-11	Ferritin, Ferritin-like, Ferritin-like diiron domain, Ferritin-like superfamily, Ferritin/DPS protein domain	GO:0006826, GO:0006879, GO:0008199
AeUmb.PI554389.v2.5U.G0282500	794.07	1.17946	0.49015	2.40632	0.0161141	0.0444577	Ferritin, Ferritin-like, Ferritin-like diiron domain, Ferritin-like superfamily, Ferritin/DPS protein domain, conserved site	GO:0006826, GO:0006879, GO:0008199
AeUmb.PI554389.v2.5U.G0282600	15.7971	7.65931	1.22774	6.23855	4.41659e-10	6.20996e-09
AeUmb.PI554389.v2.5U.G0282700	41.8239	8.47365	1.21767	6.95892	3.42895e-12	6.60466e-11
AeUmb.PI554389.v2.5U.G0283000	219.061	10.7624	1.19358	9.01689	1.93506e-19	1.03622e-17
AeUmb.PI554389.v2.5U.G0283600	13.3566	3.13936	1.07901	2.90948	0.00362035	0.0124762	ATP binding site, Leucine-rich repeat, Leucine-rich repeat domain superfamily, Protein kinase, Protein kinase domain, Protein kinase-like domain superfamily, Tyrosine-protein kinase, active site, typical subtype	GO:0004672, GO:0005515, GO:0005524, GO:0006468
AeUmb.PI554389.v2.5U.G0283800	1278.77	-0.306682	0.0942726	-3.25314	0.00114137	0.00456457	Bacterial surface antigen (D15), Surface antigen D15-like	GO:0019867
AeUmb.PI554389.v2.5U.G0284000	280.063	-1.12099	0.226791	-4.94284	7.69929e-07	6.2847e-06	Phytol/farnesol kinase	GO:0016301
AeUmb.PI554389.v2.5U.G0284100	133.543	3.23401	0.586355	5.51544	3.47908e-08	3.58007e-07	MFS transporter superfamily, Proton-dependent oligopeptide transporter family	GO:0016020, GO:0022857, GO:0055085
AeUmb.PI554389.v2.5U.G0286500	233.877	-1.12151	0.205358	-5.46123	4.72838e-08	4.76657e-07
AeUmb.PI554389.v2.5U.G0287200	743.673	-0.888553	0.209335	-4.24465	2.1894e-05	0.000134044	C2 domain, C2 domain superfamily, PLC-like phosphodiesterase, Phosphatidylinositol-specific phospholipase C, Phosphoinositide phospholipase C family, Phospholipase C, TIM beta/alpha-barrel domain superfamily, X domain, Y domain, phosphatidylinositol-specific	GO:0004435, GO:0006629, GO:0007165, GO:0008081, GO:0035556
AeUmb.PI554389.v2.5U.G0287400	157.417	1.1071	0.307581	3.59939	0.000318969	0.00147957	E3 ubiquitin ligase RBR family, IBR domain, RING-type, RING/FYVE/PHD-type, Ribonuclease H domain, Ribonuclease H superfamily, Ribonuclease H-like superfamily, TRIAD supradomain, Zinc finger, conserved site	GO:0003676, GO:0004523, GO:0004842, GO:0008270, GO:0016567
AeUmb.PI554389.v2.5U.G0287800	192.561	-1.07457	0.234323	-4.58586	4.5212e-06	3.18074e-05	Glycoside hydrolase family 17, Glycoside hydrolase superfamily, X8 domain, plant	GO:0004553, GO:0005975
AeUmb.PI554389.v2.5U.G0288100	2502.73	-0.918233	0.21318	-4.30731	1.65253e-05	0.000103676	Pentatricopeptide repeat, Tetratricopeptide-like helical domain superfamily	GO:0005515
AeUmb.PI554389.v2.5U.G0288300	510.165	0.654895	0.163918	3.99526	6.46242e-05	0.000354578	Small ribosomal subunit protein uS10, Small ribosomal subunit protein uS10 domain, Small ribosomal subunit protein uS10 domain superfamily	GO:0003735, GO:0005840, GO:0006412
AeUmb.PI554389.v2.5U.G0289000	159.334	-1.17158	0.302867	-3.8683	0.000109599	0.000571102	C-terminal catalytic domain, NEDD8-specific protease 1/2-like, Papain-like cysteine peptidase superfamily, Ulp1 protease family	GO:0006508, GO:0008234, GO:0019784
AeUmb.PI554389.v2.5U.G0290300	2119.61	0.764863	0.162754	4.69949	2.60812e-06	1.92154e-05
AeUmb.PI554389.v2.5U.G0290700	88.4524	1.74542	0.39425	4.42719	9.54685e-06	6.28864e-05	AAA+ ATPase domain, ABC transporter family G domain, ABC transporter-like, ABC-2 type transporter, ABC-transporter, ATP-binding cassette transporter, ATP-binding domain, N-terminal domain, P-loop containing nucleoside triphosphate hydrolase, PDR-like subfamily G, Plant PDR ABC transporter associated, domain 1, domain 2, transmembrane domain	GO:0005524, GO:0016020, GO:0016887, GO:0140359
AeUmb.PI554389.v2.5U.G0290800	358.785	8.51351	0.667606	12.7523	3.02689e-37	7.49329e-35
AeUmb.PI554389.v2.5U.G0291100	23.9435	-2.8404	0.736261	-3.85787	0.00011438	0.000593455	C-terminal, FY-rich, Transforming growth factor beta regulator 1, WD40-repeat-containing domain superfamily, WD40/YVTN repeat-like-containing domain superfamily	GO:0005515, GO:0005634
AeUmb.PI554389.v2.5U.G0291200	151.218	0.656694	0.277569	2.36588	0.0179873	0.0487337	FKBP-type peptidyl-prolyl cis-trans isomerase domain, Nucleoplasmin-like domain, Peptidyl-prolyl cis-trans isomerase domain superfamily	GO:0003755
AeUmb.PI554389.v2.5U.G0291800	771.659	-0.553674	0.166028	-3.33482	0.000853558	0.00353575	Alpha/Beta hydrolase fold, Lipase, Partial AB-hydrolase lipase domain, eukaryotic	GO:0006629, GO:0016788
AeUmb.PI554389.v2.5U.G0292000	1535.28	-0.430189	0.15383	-2.79653	0.0051655	0.0169907
AeUmb.PI554389.v2.5U.G0292700	597.047	-0.495576	0.131656	-3.76417	0.000167106	0.000834756
AeUmb.PI554389.v2.5U.G0292900	1147.77	-1.11019	0.269639	-4.11731	3.83329e-05	0.000221915
AeUmb.PI554389.v2.5U.G0294300	429.212	0.975984	0.28871	3.3805	0.000723532	0.00305838	Kynurenine formamidase superfamily, Kynurenine formamidase/cyclase-like	GO:0004061, GO:0019441
AeUmb.PI554389.v2.5U.G0295100	383.06	-0.895716	0.205212	-4.36483	1.27224e-05	8.17887e-05	D-isomer specific 2-hydroxyacid dehydrogenase, NAD(P)-binding domain superfamily, NAD-binding domain, NAD-binding domain conserved site, catalytic domain	GO:0016616, GO:0051287
AeUmb.PI554389.v2.5U.G0295200	5.74409	4.7364	1.45875	3.24689	0.00116674	0.00465003
AeUmb.PI554389.v2.5U.G0295700	2190.4	-0.641159	0.215061	-2.98129	0.00287037	0.0102254	ATP binding site, Protein kinase, Protein kinase domain, Protein kinase-like domain superfamily, Serine-threonine/tyrosine-protein kinase, Serine/threonine-protein kinase, active site, catalytic domain	GO:0004672, GO:0005524, GO:0006468
AeUmb.PI554389.v2.5U.G0295900	52.3262	-0.977088	0.394993	-2.47368	0.0133728	0.0380487
AeUmb.PI554389.v2.5U.G0296000	602.201	-0.449984	0.139433	-3.22724	0.00124993	0.00493984
AeUmb.PI554389.v2.5U.G0296400	1095.07	-0.441022	0.144746	-3.04687	0.00231237	0.00845909	PLC-like phosphodiesterase, TIM beta/alpha-barrel domain superfamily	GO:0006629, GO:0008081
AeUmb.PI554389.v2.5U.G0296600	227.523	-0.641085	0.174067	-3.68297	0.00023053	0.0011131	UBA-like superfamily, Ubiquitin system component CUE	GO:0005515, GO:0043130
AeUmb.PI554389.v2.5U.G0296700	642.398	-0.781619	0.172807	-4.52308	6.09472e-06	4.18252e-05
AeUmb.PI554389.v2.5U.G0297100	1161.37	-0.337169	0.132241	-2.54965	0.0107832	0.0317817	Nucleotide-binding alpha-beta plait domain superfamily, RNA recognition motif domain, RNA-binding domain superfamily, WW domain, WW domain superfamily	GO:0003676, GO:0003723, GO:0005515
AeUmb.PI554389.v2.5U.G0298700	1585.5	-3.20861	0.273756	-11.7207	9.98233e-32	1.80531e-29
AeUmb.PI554389.v2.5U.G0299600	911.044	-0.387486	0.0990372	-3.91253	9.13351e-05	0.000485481	NAD(P)-binding domain superfamily, Short-chain dehydrogenase/reductase, Short-chain dehydrogenase/reductase SDR, conserved site	GO:0016491
AeUmb.PI554389.v2.5U.G0299700	115.087	0.85906	0.301594	2.8484	0.004394	0.0147798	Argonaute, Argonaute linker 2 domain, Argonaute-like, N-terminal, PAZ domain, PAZ domain superfamily, PIWI domain, Piwi domain, Protein argonaute, Ribonuclease H superfamily, Ribonuclease H-like superfamily, linker 1 domain	GO:0003676, GO:0003723, GO:0005515
AeUmb.PI554389.v2.5U.G0300800	1404.1	-0.299314	0.0933803	-3.20533	0.00134909	0.00528611
AeUmb.PI554389.v2.5U.G0301300	822.132	-1.43395	0.205559	-6.97586	3.03997e-12	5.90818e-11	Glyceraldehyde 3-phosphate dehydrogenase, Glyceraldehyde/Erythrose phosphate dehydrogenase family, catalytic domain	GO:0016620
AeUmb.PI554389.v2.5U.G0301400	49.4931	3.14758	0.572376	5.49916	3.81615e-08	3.90564e-07
AeUmb.PI554389.v2.5U.G0301800	467.944	1.21252	0.158334	7.65798	1.88882e-14	5.03497e-13
AeUmb.PI554389.v2.5U.G0302200	1116.48	0.531693	0.175947	3.02189	0.00251199	0.00909787	Aminoglycoside phosphotransferase, Cupin-like domain 8, F-box domain, F-box-like domain superfamily, JmjC domain, Protein kinase-like domain superfamily	GO:0005515
AeUmb.PI554389.v2.5U.G0302600	2126.98	0.672159	0.228929	2.9361	0.00332369	0.0116035
AeUmb.PI554389.v2.5U.G0302700	98.3606	-1.12366	0.306905	-3.66127	0.000250965	0.00120083	Minichromosome loss protein Mcl1, WD40 repeat, WD40-repeat-containing domain superfamily, WD40/YVTN repeat-like-containing domain superfamily, conserved site, middle region	GO:0005515
AeUmb.PI554389.v2.5U.G0303100	228.914	1.48957	0.280824	5.30429	1.13115e-07	1.07026e-06
AeUmb.PI554389.v2.5U.G0303500	3669.6	-0.542169	0.197606	-2.74368	0.00607538	0.0194931	Armadillo-type fold, C-terminal, E3 ubiquitin ligase UBR4, E3 ubiquitin ligase UBR4-like, UBR-type, WD40-repeat-containing domain superfamily, ZZ-type, ZZ-type superfamily, Zinc finger	GO:0005515, GO:0008270
AeUmb.PI554389.v2.5U.G0304000	242.232	0.850998	0.344241	2.4721	0.0134322	0.0381961	Cathepsin propeptide inhibitor domain (I29), Cysteine peptidase, Papain-like cysteine endopeptidase, Papain-like cysteine peptidase superfamily, Peptidase C1A, cysteine active site, histidine active site, papain C-terminal	GO:0006508, GO:0008234
AeUmb.PI554389.v2.5U.G0304400	2695.7	-0.684302	0.0983372	-6.95873	3.43348e-12	6.60918e-11
AeUmb.PI554389.v2.5U.G0304600	509.554	-0.643703	0.236941	-2.71673	0.00659308	0.0209054	Kelch repeat type 1, Kelch-type beta propeller	GO:0005515
AeUmb.PI554389.v2.5U.G0306000	18.3291	7.43049	1.2771	5.81827	5.94606e-09	6.89643e-08
AeUmb.PI554389.v2.5U.G0306100	21.0514	3.97504	0.815225	4.876	1.08261e-06	8.59087e-06
AeUmb.PI554389.v2.5U.G0306700	24.5161	7.71221	1.25191	6.16037	7.2577e-10	9.81626e-09
AeUmb.PI554389.v2.5U.G0306900	4896.63	-0.433475	0.119896	-3.61543	0.00029985	0.00140274
AeUmb.PI554389.v2.5U.G0307000	96.7421	-1.04063	0.380883	-2.73215	0.00629233	0.0200825
AeUmb.PI554389.v2.5U.G0307900	10.4328	-6.00211	1.6411	-3.65736	0.000254824	0.00121564
AeUmb.PI554389.v2.5U.G0308000	35.951	-8.86263	1.555	-5.69943	1.20207e-08	1.33523e-07
AeUmb.PI554389.v2.5U.G0308200	154.53	1.29787	0.316394	4.10206	4.09493e-05	0.000235437	F-box domain, F-box-like domain superfamily	GO:0005515
AeUmb.PI554389.v2.5U.G0308300	1208.27	-1.82155	0.115316	-15.7962	3.30445e-56	2.03675e-53	2-phosphoglycolate phosphatase, HAD superfamily, HAD-like superfamily, HAD-superfamily hydrolase, eukaryotic, subfamily IIA	GO:0016791
AeUmb.PI554389.v2.5U.G0308600	21.3772	7.34735	1.25963	5.83293	5.44619e-09	6.36309e-08	F-box-like domain superfamily	GO:0005515
AeUmb.PI554389.v2.5U.G0308800	19.129	7.5725	1.30704	5.7936	6.88914e-09	7.91727e-08
AeUmb.PI554389.v2.5U.G0309100	59.632	9.15243	1.23519	7.40973	1.26559e-13	2.98854e-12
AeUmb.PI554389.v2.5U.G0309200	172.675	10.7257	1.20087	8.93157	4.20021e-19	2.11777e-17
AeUmb.PI554389.v2.5U.G0309300	200.301	10.7776	1.19567	9.01384	1.98974e-19	1.06361e-17
AeUmb.PI554389.v2.5U.G0309500	266.063	-0.940014	0.309981	-3.03249	0.00242543	0.00882456
AeUmb.PI554389.v2.5U.G0309600	4.71029	6.01602	1.77999	3.3798	0.000725394	0.00306539	FHY3/FAR1 family, PMZ-type, Zinc finger	GO:0006355, GO:0008270
AeUmb.PI554389.v2.5U.G0310100	24.0189	1.86679	0.718876	2.59681	0.00940934	0.0282767
AeUmb.PI554389.v2.5U.G0310600	2099.62	-0.40378	0.141674	-2.85006	0.00437109	0.0147175	Snf7 family	GO:0007034
AeUmb.PI554389.v2.5U.G0311900	445.978	-0.663339	0.160848	-4.124	3.72345e-05	0.000216372	Polyamine biosynthesis domain, S-adenosyl-L-methionine-dependent methyltransferase superfamily, Spermidine synthase, Spermidine/spermine synthase, Spermidine/spermine synthases, conserved site, eukaryotes, tetramerisation domain, tetramerisation domain superfamily	GO:0003824, GO:0006595, GO:0008757
AeUmb.PI554389.v2.5U.G0312100	36.4621	-3.87982	1.47598	-2.62864	0.00857266	0.0261368	LEA_1 subgroup, Late embryogenesis abundant protein	GO:0009793
AeUmb.PI554389.v2.5U.G0312500	974.701	-0.743849	0.127446	-5.83659	5.32799e-09	6.23464e-08	ENT domain, ENT domain-like superfamily, Lamin-B receptor of TUDOR domain, Protein EMSY-LIKE, plant	GO:0050832
AeUmb.PI554389.v2.5U.G0312800	306.603	-0.775791	0.171564	-4.52188	6.12932e-06	4.20435e-05	Protein kinase domain, Protein kinase-like domain superfamily, Serine/threonine-protein kinase, active site	GO:0004672, GO:0005524, GO:0006468
AeUmb.PI554389.v2.5U.G0313700	258.543	0.61654	0.237811	2.59257	0.00952629	0.0286025	C-terminal, Gfo/Idh/MocA-like oxidoreductase, N-terminal, NAD(P)-binding domain superfamily	GO:0000166
AeUmb.PI554389.v2.5U.G0313800	89.8889	-1.47824	0.353105	-4.1864	2.83419e-05	0.0001691
AeUmb.PI554389.v2.5U.G0313900	13.2318	5.82501	1.45126	4.01375	5.97622e-05	0.000330575
AeUmb.PI554389.v2.5U.G0314300	2001.51	-0.206684	0.0820131	-2.52014	0.0117309	0.0341293	G-patch domain, SURP and G-patch domain-containing protein 1/2, SWAP/Surp, SWAP/Surp superfamily	GO:0003676, GO:0003723, GO:0006396
AeUmb.PI554389.v2.5U.G0315100	1033.07	0.274078	0.104129	2.6321	0.0084859	0.0259089	GrpE nucleotide exchange factor, coiled-coil, head	GO:0000774, GO:0006457, GO:0042803, GO:0051087
AeUmb.PI554389.v2.5U.G0315200	177.747	0.824766	0.20845	3.95666	7.60051e-05	0.000410131
AeUmb.PI554389.v2.5U.G0315400	320.655	-0.672043	0.199693	-3.36538	0.000764373	0.00320722	ApaH type, Calcineurin-like phosphoesterase domain, Metallo-dependent phosphatase-like, Serine/Threonine protein phosphatase PP2A-like, Serine/threonine-specific protein phosphatase/bis(5-nucleosyl)-tetraphosphatase	GO:0004722, GO:0016787
AeUmb.PI554389.v2.5U.G0315500	36.0901	8.56919	1.21901	7.02962	2.07098e-12	4.13128e-11
AeUmb.PI554389.v2.5U.G0316300	1200.57	-0.489367	0.147151	-3.32562	0.000882216	0.003638	CPA1 family, Cation/H+ exchanger, Na+/H+ exchanger	GO:0006812, GO:0006814, GO:0006885, GO:0015297, GO:0015385, GO:0016020, GO:0055085, GO:1902600
AeUmb.PI554389.v2.5U.G0316500	70.5754	2.4097	0.522623	4.61078	4.01161e-06	2.84677e-05	AP2/ERF domain, AP2/ERF domain superfamily, DNA-binding domain superfamily, Ethylene-responsive transcription factor	GO:0003677, GO:0003700, GO:0006355, GO:0009873
AeUmb.PI554389.v2.5U.G0317200	277.329	1.07046	0.298002	3.59214	0.000327979	0.00151393
AeUmb.PI554389.v2.5U.G0317400	11603.8	-3.73949	0.213536	-17.5122	1.15569e-68	1.51757e-65	ACT domain, ACT-like domain, Acetylglutamate kinase-like superfamily, Aspartate kinase, Aspartate/glutamate/uridylate kinase, Aspartate/homoserine dehydrogenase, Bifunctional aspartokinase/homoserine dehydrogenase, CASTOR, Homoserine dehydrogenase, N-terminal catalytic domain, NAD(P)-binding domain superfamily, NAD-binding, catalytic, conserved site	GO:0004072, GO:0004412, GO:0006520, GO:0008652, GO:0009067, GO:0016491, GO:0050661
AeUmb.PI554389.v2.5U.G0318500	534.138	-0.486312	0.189688	-2.56375	0.0103547	0.0307022	Anaphase-promoting complex subunit 4-like, G-protein beta WD-40 repeat, TREX component Tex1/THOC3, WD40 domain, WD40 repeat, WD40-repeat-containing domain superfamily, WD40/YVTN repeat-like-containing domain superfamily, conserved site	GO:0005515, GO:0006406
AeUmb.PI554389.v2.5U.G0319400	1127.24	3.03419	0.750671	4.04198	5.30028e-05	0.000297048	Alpha-dioxygenase, Haem peroxidase, Haem peroxidase domain superfamily, Haem peroxidase superfamily, animal type, animal-type	GO:0004601, GO:0006979, GO:0016491, GO:0020037
AeUmb.PI554389.v2.5U.G0322400	1114.7	-13.1869	1.46236	-9.01755	1.92342e-19	1.03223e-17	Aquaporin transporter, Aquaporin-like, Major intrinsic protein, conserved site	GO:0015267, GO:0016020, GO:0055085
AeUmb.PI554389.v2.5U.G0322800	37.1151	4.51967	0.666278	6.78346	1.17331e-11	2.09434e-10
AeUmb.PI554389.v2.5U.G0323200	342.76	-0.60566	0.16847	-3.59507	0.000324301	0.00150062	PPM-type phosphatase-like domain, PPM-type phosphatase-like domain superfamily, Protein phosphatase 2C family	GO:0004722, GO:0006470
AeUmb.PI554389.v2.5U.G0323600	4.89142	-5.78292	2.26517	-2.55297	0.0106809	0.0315178	CCHC-type superfamily, Retrotransposon gag domain, Zinc finger	GO:0003676, GO:0008270
AeUmb.PI554389.v2.5U.G0323700	478.51	-1.02918	0.191088	-5.38587	7.20952e-08	7.05579e-07	Cysteine oxygenase/2-aminoethanethiol dioxygenase, RmlC-like cupin domain superfamily, RmlC-like jelly roll fold	GO:0016702
AeUmb.PI554389.v2.5U.G0324300	502.318	-0.353041	0.148635	-2.37523	0.0175382	0.0477154	FeS cluster biogenesis, FeS cluster insertion protein, HesB-like domain superfamily	GO:0016226, GO:0051536
AeUmb.PI554389.v2.5U.G0324800	1200.49	-0.739113	0.121742	-6.07115	1.27001e-09	1.6576e-08
AeUmb.PI554389.v2.5U.G0328200	150.233	1.3018	0.367689	3.5405	0.000399368	0.00180348	Apoptotic protease-activating factors, Disease resistance protein, Leucine-rich repeat domain superfamily, N-terminal, NB-ARC, P-loop containing nucleoside triphosphate hydrolase, RPW8-like, Rx, Winged helix-like DNA-binding domain superfamily, helical domain	GO:0043531, GO:0050832
AeUmb.PI554389.v2.5U.G0328900	7.86066	3.15545	1.27882	2.46748	0.0136067	0.0386268	Ankyrin repeat, Ankyrin repeat-containing domain superfamily, PGG domain	GO:0005515
AeUmb.PI554389.v2.5U.G0329200	271.707	-0.702254	0.251993	-2.78679	0.00532324	0.0174256
AeUmb.PI554389.v2.5U.G0329400	205.24	2.12704	0.621678	3.42144	0.000622899	0.00267989	WRKY domain, WRKY domain superfamily, WRKY transcription factor, plant	GO:0003700, GO:0006355, GO:0043565
AeUmb.PI554389.v2.5U.G0329500	677.931	0.671371	0.2836	2.36732	0.0179177	0.0485902	WRKY domain, WRKY domain superfamily, WRKY transcription factor, plant	GO:0003700, GO:0006355, GO:0043565
AeUmb.PI554389.v2.5U.G0330800	18.5249	2.76264	0.930169	2.97004	0.00297758	0.0105582	ATP binding site, Protein kinase, Protein kinase domain, Protein kinase-like domain superfamily, Serine/threonine-protein kinase, active site	GO:0004672, GO:0005524, GO:0006468
AeUmb.PI554389.v2.5U.G0331000	31.0519	3.95897	0.665856	5.94568	2.75314e-09	3.39944e-08
AeUmb.PI554389.v2.5U.G0331200	451.079	-0.443306	0.178055	-2.48971	0.0127847	0.0366479
AeUmb.PI554389.v2.5U.G0331400	243.693	1.89832	0.318065	5.96836	2.39649e-09	2.9847e-08	ATP-NAD kinase, C-terminal, Inorganic polyphosphate/ATP-NAD kinase, N-terminal, NAD kinase, NAD kinase/diacylglycerol kinase-like domain superfamily, PpnK-type	GO:0003951, GO:0006741, GO:0019674
AeUmb.PI554389.v2.5U.G0331700	293.559	-0.811316	0.216609	-3.74554	0.000180009	0.000893005
AeUmb.PI554389.v2.5U.G0332100	4.76172	6.46564	1.60968	4.01673	5.90118e-05	0.000326843	CCHC-type, Zinc finger	GO:0003676, GO:0008270
AeUmb.PI554389.v2.5U.G0332300	13.4248	1.93283	0.780447	2.47656	0.0132654	0.0377851	Anaphase-promoting complex subunit 4-like, WD repeat Cdc20/Fizzy, WD40 domain, WD40 repeat, WD40-repeat-containing domain superfamily, WD40/YVTN repeat-like-containing domain superfamily, conserved site	GO:0005515, GO:0010997, GO:0097027, GO:1904668
AeUmb.PI554389.v2.5U.G0334100	1947	-0.640866	0.0995154	-6.43987	1.19573e-10	1.82483e-09
AeUmb.PI554389.v2.5U.G0334200	9.92907	6.99026	1.29892	5.38158	7.38343e-08	7.20266e-07
AeUmb.PI554389.v2.5U.G0335200	414.4	1.67503	0.212989	7.8644	3.70856e-15	1.09488e-13
AeUmb.PI554389.v2.5U.G0335400	4014.16	-0.3244	0.0851623	-3.8092	0.000139415	0.000710291	Eukaryotic porin/Tom40, Porin, Porin domain superfamily, eukaryotic type	GO:0005741, GO:0008308, GO:0055085, GO:0098656
AeUmb.PI554389.v2.5U.G0335600	1595.3	-1.19276	0.346066	-3.44663	0.000567627	0.00246421	Alcohol dehydrogenase, Alcohol dehydrogenase-like, C-terminal, GroES-like superfamily, N-terminal, NAD(P)-binding domain superfamily, conserved site, zinc-type	GO:0008270, GO:0016491
AeUmb.PI554389.v2.5U.G0335800	11411.7	-0.912631	0.137698	-6.62776	3.40818e-11	5.66193e-10	Aminopeptidase N-like , Aminopeptidase N-type, CTD superfamily, ERAP1-like C-terminal domain, N-terminal domain, N-terminal domain superfamliy, Peptidase M1, Peptidase M4/M1, alanine aminopeptidase/leukotriene A4 hydrolase, membrane alanine aminopeptidase	GO:0006508, GO:0008237, GO:0008270
AeUmb.PI554389.v2.5U.G0336300	138.991	1.01238	0.322229	3.14179	0.00167918	0.00639446	Sphingosine N-acyltransferase Lag1/Lac1-like, TRAM/LAG1/CLN8 homology domain	GO:0016020, GO:0046513, GO:0050291
AeUmb.PI554389.v2.5U.G0337000	717.605	-0.562082	0.180738	-3.10993	0.00187131	0.00701815
AeUmb.PI554389.v2.5U.G0338300	74.4575	2.12173	0.509488	4.16443	3.12134e-05	0.000184555
AeUmb.PI554389.v2.5U.G0338500	15.2807	4.21148	1.03759	4.05892	4.92994e-05	0.000278463
AeUmb.PI554389.v2.5U.G0338600	44.6013	5.42858	0.825655	6.57488	4.86935e-11	7.91093e-10
AeUmb.PI554389.v2.5U.G0338700	222.492	1.77204	0.45947	3.85671	0.000114923	0.00059617
AeUmb.PI554389.v2.5U.G0339000	13.9787	-2.24102	0.882271	-2.54006	0.0110835	0.0325214	HMA, Heavy metal binding protein HIPP-like, Heavy metal-associated domain, Heavy metal-associated domain superfamily	GO:0046872
AeUmb.PI554389.v2.5U.G0339100	95.2189	3.50286	0.389505	8.99312	2.40312e-19	1.27109e-17
AeUmb.PI554389.v2.5U.G0340700	158.145	1.70709	0.312384	5.4647	4.6369e-08	4.68217e-07	Nucleic acid-binding, OB domain, OB-fold, Replication factor A protein 1, Replication protein A	GO:0003677, GO:0005634, GO:0006260, GO:0006281, GO:0006310
AeUmb.PI554389.v2.5U.G0341300	1059.48	0.423708	0.139852	3.02969	0.00244808	0.00889412
AeUmb.PI554389.v2.5U.G0342800	323.745	-0.591583	0.214057	-2.76367	0.00571555	0.0184839	FAD/NAD(P)-binding domain superfamily, Flavin monooxygenase FMO, Flavin monooxygenase-like	GO:0004499, GO:0050660, GO:0050661
AeUmb.PI554389.v2.5U.G0343300	83.6742	4.42146	0.52074	8.49072	2.05366e-17	8.24796e-16	Alpha/Beta hydrolase fold, Fungal lipase-like domain	GO:0006629
AeUmb.PI554389.v2.5U.G0344200	74.0243	1.26097	0.369414	3.41343	0.000641512	0.00274978
AeUmb.PI554389.v2.5U.G0344300	11.0726	6.80475	1.36133	4.99859	5.77498e-07	4.82879e-06
AeUmb.PI554389.v2.5U.G0344400	5.81723	4.60037	1.43002	3.217	0.0012954	0.00509491
AeUmb.PI554389.v2.5U.G0344500	21.9087	7.69338	1.30935	5.87573	4.20973e-09	5.03534e-08
AeUmb.PI554389.v2.5U.G0345400	403.646	-0.6171	0.197391	-3.12629	0.00177028	0.00669579	F-box associated domain, F-box associated interaction domain, F-box domain, F-box-like domain superfamily, Galactose oxidase/kelch, beta-propeller, type 3	GO:0005515
AeUmb.PI554389.v2.5U.G0345500	54.3436	9.04426	1.27626	7.08656	1.37488e-12	2.81711e-11
AeUmb.PI554389.v2.5U.G0347100	630.218	-0.693388	0.246359	-2.81454	0.00488465	0.0162081	ATP binding site, Protein kinase, Protein kinase domain, Protein kinase-like domain superfamily, Serine/threonine-protein kinase, active site	GO:0004672, GO:0005524, GO:0006468
AeUmb.PI554389.v2.5U.G0347400	90.0304	2.2873	0.451199	5.06939	3.99086e-07	3.42615e-06
AeUmb.PI554389.v2.5U.G0348800	807.692	0.764646	0.297955	2.56632	0.0102785	0.0305153	Helix-turn-helix motif, Homeobox, Homeobox domain, Homeobox-leucine zipper protein, Homeobox-like domain superfamily, Leucine zipper, class I, conserved site, homeobox-associated, plant	GO:0000981, GO:0003677, GO:0003700, GO:0006355, GO:0043565
AeUmb.PI554389.v2.5U.G0349000	908.395	1.16149	0.249991	4.64612	3.38235e-06	2.43803e-05	C-terminal domain, Endo-1,3(4)-beta-glucanase, Glycosyl hydrolase family 81, N-terminal	GO:0052861
AeUmb.PI554389.v2.5U.G0349200	16.6327	4.463	1.04547	4.26891	1.96429e-05	0.000121469	FHY3/FAR1 family, MULE transposase domain	GO:0006355
AeUmb.PI554389.v2.5U.G0349300	54.946	5.89548	0.937055	6.2915	3.14414e-10	4.53266e-09
AeUmb.PI554389.v2.5U.G0349500	146.75	10.563	1.19313	8.85315	8.50818e-19	4.11143e-17
AeUmb.PI554389.v2.5U.G0349600	647.06	12.6003	1.18222	10.6582	1.59725e-26	1.88439e-24
AeUmb.PI554389.v2.5U.G0350300	13.6877	6.13487	1.31686	4.6587	3.18212e-06	2.30803e-05
AeUmb.PI554389.v2.5U.G0353000	114.298	-1.1507	0.436077	-2.63876	0.00832098	0.0254897
AeUmb.PI554389.v2.5U.G0353700	724.915	1.05052	0.411856	2.55071	0.0107504	0.0316951	Protein PLASTID REDOX INSENSITIVE 2	GO:0010468
AeUmb.PI554389.v2.5U.G0354300	1391.82	0.3546	0.117296	3.02312	0.00250186	0.00906444	ATP-binding domain, C-terminal, DEAD-box type, DEAD/DEAH box helicase domain, Helicase, Helicase superfamily 1/2, P-loop containing nucleoside triphosphate hydrolase, Q motif, RNA helicase	GO:0003676, GO:0003724, GO:0005524
AeUmb.PI554389.v2.5U.G0354700	255.854	1.50842	0.407168	3.70466	0.000211676	0.0010328	AN1-like Zinc finger, AN1-type, Zinc finger	GO:0008270
AeUmb.PI554389.v2.5U.G0355900	14.184	3.20536	1.18866	2.69661	0.00700502	0.022006	C-terminal, C2 domain, C2 domain superfamily, Phospholipase D, Phospholipase D family, Phospholipase D/Transphosphatidylase, plant	GO:0003824, GO:0004630, GO:0005509, GO:0016020, GO:0046470
AeUmb.PI554389.v2.5U.G0356100	537.811	-0.538662	0.134379	-4.00854	6.10966e-05	0.000336722	Alpha/Beta hydrolase fold, EDS1, EDS1-like, EP domain, Fungal lipase-like domain	GO:0006629, GO:0006952
AeUmb.PI554389.v2.5U.G0356200	700.669	-0.51387	0.210414	-2.44218	0.0145988	0.0409693	Histone demethylase JHDM2-like, JmjC domain, RING-type, Zinc finger, Zinc-finger domain of monoamine-oxidase A repressor R1	GO:0032454, GO:0033169
AeUmb.PI554389.v2.5U.G0356700	336.744	-0.597476	0.184014	-3.24691	0.00116667	0.00465003
AeUmb.PI554389.v2.5U.G0357600	1414.74	2.5775	0.496817	5.18803	2.12526e-07	1.91318e-06	Ccc1 family	GO:0005384, GO:0030026
AeUmb.PI554389.v2.5U.G0357700	3792.97	-1.14636	0.303848	-3.77282	0.00016141	0.000809381	Glycosyl transferase, HAD superfamily, HAD-like superfamily, HAD-superfamily hydrolase, Trehalose-phosphatase, family 20, subfamily IIB	GO:0003824, GO:0005992
AeUmb.PI554389.v2.5U.G0359400	206.148	2.17822	0.709258	3.07112	0.00213256	0.00788245
AeUmb.PI554389.v2.5U.G0359700	155.676	10.1549	1.2039	8.43498	3.3125e-17	1.29591e-15
AeUmb.PI554389.v2.5U.G0359900	892.443	-0.616691	0.129217	-4.77254	1.81921e-06	1.38502e-05	Tetratricopeptide repeat, Tetratricopeptide-like helical domain superfamily, Thioredoxin, Thioredoxin domain, Thioredoxin-like superfamily, conserved site	GO:0005515
AeUmb.PI554389.v2.5U.G0360400	459.138	-0.440082	0.178739	-2.46215	0.0138107	0.0391177	PUB domain, PUB-like domain superfamily, Rad18, UBX domain, Ubiquitin-like domain superfamily, zinc finger UBZ4-type	GO:0003677, GO:0005515, GO:0006281
AeUmb.PI554389.v2.5U.G0360900	29.097	-6.79508	1.58602	-4.28436	1.83265e-05	0.000113982	Cytochrome P450, Cytochrome P450 superfamily, E-class, group I	GO:0004497, GO:0005506, GO:0016705, GO:0020037
AeUmb.PI554389.v2.5U.G0361100	94.4133	1.48815	0.459887	3.2359	0.0012126	0.00481185	SprT-like, SprT-like domain-containing protein Spartan	GO:0003697, GO:0004222, GO:0006974
AeUmb.PI554389.v2.5U.G0362000	117.985	-0.953166	0.371464	-2.56597	0.0102888	0.0305338	C-terminal, DNA mismatch repair MutS family, DNA mismatch repair protein MutS, DNA mismatch repair protein MutS-like, DNA mismatch repair protein MutS/MSH, MutS, N-terminal, P-loop containing nucleoside triphosphate hydrolase, Tudor domain, clamp, connector domain, connector domain superfamily, core, core domain superfamily	GO:0005524, GO:0006298, GO:0030983, GO:0140664
AeUmb.PI554389.v2.5U.G0362500	1046.99	-0.69778	0.214191	-3.25774	0.00112301	0.0045007	2-oxo acid dehydrogenase, 2-oxoacid dehydrogenase acyltransferase, Biotin/lipoyl attachment, Chloramphenicol acetyltransferase-like domain superfamily, Dihydrolipoamide acetyltransferase/Pyruvate dehydrogenase protein X component, E3-binding domain superfamily, Peripheral subunit-binding domain, Single hybrid motif, catalytic domain, lipoyl-binding site	GO:0006086, GO:0016746, GO:0045254
AeUmb.PI554389.v2.5U.G0362900	182.59	1.02719	0.335616	3.06062	0.00220881	0.00812949	Alpha crystallin/Hsp20 domain, HSP20-like chaperone, Heat shock protein 21-like	GO:0009408
AeUmb.PI554389.v2.5U.G0363000	1129.41	-0.550614	0.210164	-2.61993	0.00879485	0.0267064	Aminopeptidase N-like , Armadillo-like helical, Armadillo-type fold, CTD superfamily, N-terminal domain superfamliy, Peptidase M1, Peptidase M4/M1, Transcription initiation factor TFIID subunit 2, membrane alanine aminopeptidase	GO:0005669, GO:0008237, GO:0008270
AeUmb.PI554389.v2.5U.G0363100	369.099	-0.531141	0.199427	-2.66334	0.0077369	0.0239605
AeUmb.PI554389.v2.5U.G0364400	114.562	1.60655	0.448442	3.58251	0.000340307	0.00156509
AeUmb.PI554389.v2.5U.G0364700	34.1546	-8.91751	1.47668	-6.03888	1.55189e-09	1.99532e-08	FAR1 DNA binding domain, FHY3/FAR1 family, MULE transposase domain	GO:0006355
AeUmb.PI554389.v2.5U.G0364800	143.353	1.50149	0.364297	4.12162	3.76221e-05	0.000218302	Cytochrome P450, Cytochrome P450 superfamily, E-class, conserved site, group I	GO:0004497, GO:0005506, GO:0016705, GO:0020037
AeUmb.PI554389.v2.5U.G0365000	60.8559	7.40088	1.19754	6.18006	6.40776e-10	8.76085e-09	ATP binding site, Protein kinase, Protein kinase domain, Protein kinase-like domain superfamily, Serine-threonine/tyrosine-protein kinase, Serine/threonine-protein kinase, active site, catalytic domain	GO:0004672, GO:0005524, GO:0006468
AeUmb.PI554389.v2.5U.G0365300	147.758	-0.835087	0.291396	-2.86581	0.00415939	0.0140911	Mediator complex, subunit Med20	GO:0003712, GO:0006357, GO:0016592
AeUmb.PI554389.v2.5U.G0365600	52.2627	-4.81327	0.943108	-5.10362	3.33211e-07	2.90941e-06	F-box-like domain superfamily, Leucine-rich repeat domain superfamily	GO:0005515
AeUmb.PI554389.v2.5U.G0366000	909.996	-0.663134	0.209014	-3.17268	0.00151037	0.0058303	Peptidase M18, domain 2	GO:0004177, GO:0006508, GO:0008270
AeUmb.PI554389.v2.5U.G0367900	502.028	1.61778	0.317375	5.09739	3.44366e-07	3.00073e-06
AeUmb.PI554389.v2.5U.G0368100	37.7438	-1.84571	0.642008	-2.8749	0.00404151	0.0137519
AeUmb.PI554389.v2.5U.G0368200	9120.8	-0.756626	0.236137	-3.20419	0.00135444	0.00530293	Cathepsin propeptide inhibitor domain (I29), Cysteine peptidase, Papain-like cysteine endopeptidase, Papain-like cysteine peptidase superfamily, Peptidase C1A, asparagine active site, cysteine active site, histidine active site, papain C-terminal	GO:0006508, GO:0008234
AeUmb.PI554389.v2.5U.G0368500	13.6101	-6.67397	1.64802	-4.04968	5.12872e-05	0.000288719
AeUmb.PI554389.v2.5U.G0371500	647.579	-0.932401	0.119706	-7.78911	6.7482e-15	1.90833e-13	SAYSvFN domain, SAYSvFN domain-containing protein 1, Ubiquitin-like domain, Ubiquitin-like domain superfamily	GO:0005515
AeUmb.PI554389.v2.5U.G0371600	691.181	-1.67608	0.301453	-5.56002	2.69746e-08	2.83243e-07	AIG2-like domain, Gamma-glutamyl cyclotransferase-like, Gamma-glutamyl cyclotransferase-like superfamily, Gamma-glutamylaminecyclotransferase, Gamma-glutamylcyclotransferase	GO:0061929
AeUmb.PI554389.v2.5U.G0373600	2046.31	1.89061	0.516518	3.6603	0.000251921	0.00120426
AeUmb.PI554389.v2.5U.G0374000	3771.34	-0.830804	0.158737	-5.23386	1.66008e-07	1.53046e-06
AeUmb.PI554389.v2.5U.G0375400	210.071	0.600401	0.20053	2.99407	0.00275279	0.00985418	2Fe-2S ferredoxin-like superfamily, 2Fe-2S ferredoxin-type iron-sulfur binding domain, Adrenodoxin, Beta-grasp domain superfamily, iron-sulphur binding site	GO:0051536, GO:0051537, GO:0140647
AeUmb.PI554389.v2.5U.G0375500	2895.91	0.711225	0.207869	3.4215	0.000622758	0.00267966
AeUmb.PI554389.v2.5U.G0376900	12.7456	-3.31518	1.06915	-3.10076	0.00193027	0.00721064	PDZ superfamily	GO:0005515
AeUmb.PI554389.v2.5U.G0377000	72.9189	-4.1254	0.7333	-5.62581	1.84644e-08	1.98597e-07	PA clan, PDZ domain, PDZ superfamily, Peptidase S1	GO:0005515
AeUmb.PI554389.v2.5U.G0377500	45.5435	2.10689	0.66152	3.18492	0.00144795	0.00561229	E3 ubiquitin ligase RBR family, IBR domain, RING-type, RING/FYVE/PHD-type, TRIAD supradomain, Zinc finger, conserved site	GO:0004842, GO:0008270, GO:0016567
AeUmb.PI554389.v2.5U.G0378400	2777.72	0.853315	0.159113	5.36297	8.18667e-08	7.91466e-07	AP2/ERF domain, AP2/ERF domain superfamily, DNA-binding domain superfamily, Ethylene-responsive transcription factor	GO:0003677, GO:0003700, GO:0006355, GO:0009873
AeUmb.PI554389.v2.5U.G0379200	159.711	0.954205	0.299596	3.18498	0.00144766	0.00561188
AeUmb.PI554389.v2.5U.G0380500	218.341	1.13712	0.370588	3.06842	0.00215191	0.00794327	Glycosyl transferase, family 31	GO:0006486, GO:0016020, GO:0016758
AeUmb.PI554389.v2.5U.G0381400	774.265	1.06121	0.324062	3.27472	0.00105767	0.00426029	AAA+ ATPase domain, AAA-type, AAA-type ATPase, ATPase, N-terminal domain, P-loop containing nucleoside triphosphate hydrolase, core	GO:0005524, GO:0016887
AeUmb.PI554389.v2.5U.G0382200	676.01	0.49937	0.148745	3.35722	0.000787315	0.00328977	23-30kDa subunit, Transcription initiation factor TFIID	GO:0005634, GO:0006352
AeUmb.PI554389.v2.5U.G0382300	35.8517	8.46443	1.25283	6.75626	1.41603e-11	2.49225e-10
AeUmb.PI554389.v2.5U.G0382900	114.991	1.0114	0.285994	3.53642	0.000405588	0.00182966
AeUmb.PI554389.v2.5U.G0383100	154.473	3.18582	0.599617	5.31309	1.07783e-07	1.02463e-06	C-terminal, Ionotropic glutamate receptor, Periplasmic binding protein-like I, Receptor, Solute-binding protein family 3/N-terminal domain of MltF, ligand binding region, plant	GO:0015276, GO:0016020
AeUmb.PI554389.v2.5U.G0383400	83.0364	2.75727	0.406384	6.78491	1.16163e-11	2.07595e-10	C-terminal, Ionotropic glutamate receptor, Periplasmic binding protein-like I, Plant glutamate receptor, Receptor, Solute-binding protein family 3/N-terminal domain of MltF, ligand binding region, periplasmic ligand-binding domain, plant	GO:0015276, GO:0016020
AeUmb.PI554389.v2.5U.G0383500	4.45253	5.7721	1.66058	3.47594	0.000509059	0.00223338	C-terminal, GPCR, Ionotropic glutamate receptor, L-glutamate and glycine-binding domain, Periplasmic binding protein-like I, Plant glutamate receptor, Receptor, family 3, ligand binding region, periplasmic ligand-binding domain	GO:0004930, GO:0004970, GO:0007186, GO:0015276, GO:0016020
AeUmb.PI554389.v2.5U.G0383700	59.3998	1.55839	0.624844	2.49405	0.0126296	0.0362951
AeUmb.PI554389.v2.5U.G0384000	420.668	1.55976	0.511476	3.04952	0.00229206	0.00839293
AeUmb.PI554389.v2.5U.G0384200	50.481	2.56561	0.514757	4.98413	6.22414e-07	5.17855e-06
AeUmb.PI554389.v2.5U.G0384400	35.0163	4.7931	1.16834	4.10251	4.08699e-05	0.00023507
AeUmb.PI554389.v2.5U.G0384700	114.615	-1.80939	0.292971	-6.17599	6.57484e-10	8.96899e-09
AeUmb.PI554389.v2.5U.G0385700	3322.54	0.706391	0.26042	2.71251	0.00667752	0.021131	Tetraspani, Tetraspanin, Tetraspanin/Peripherin, conserved site, plant	GO:0009734, GO:0016020
AeUmb.PI554389.v2.5U.G0385800	52.4827	-3.93604	0.879074	-4.47748	7.55287e-06	5.07693e-05
AeUmb.PI554389.v2.5U.G0386500	20.2537	2.86274	0.750781	3.81301	0.000137284	0.000700737	S-adenosylmethionine decarboxylase, conserved site, core	GO:0004014, GO:0006597, GO:0008295
AeUmb.PI554389.v2.5U.G0386600	20.0651	7.20094	1.24554	5.78138	7.40886e-09	8.48228e-08
AeUmb.PI554389.v2.5U.G0386700	17.911	5.6982	1.33884	4.25608	2.0804e-05	0.000128098
AeUmb.PI554389.v2.5U.G0386900	1651.75	-0.364006	0.1534	-2.37292	0.0176482	0.0479671
AeUmb.PI554389.v2.5U.G0387100	13.6863	6.47518	1.45013	4.46526	7.9972e-06	5.34243e-05
AeUmb.PI554389.v2.5U.G0387200	14.6617	-6.81257	1.60335	-4.24896	2.14762e-05	0.000131781
AeUmb.PI554389.v2.5U.G0387500	402.18	-2.4311	0.321645	-7.55832	4.0832e-14	1.03025e-12	Biopterin transporter family, Folate-biopterin transporter, MFS transporter superfamily	GO:0016020
AeUmb.PI554389.v2.5U.G0388700	340.099	-0.825068	0.343681	-2.40068	0.0163646	0.0450214
AeUmb.PI554389.v2.5U.G0389000	473.398	0.676142	0.155178	4.3572	1.31738e-05	8.4421e-05	F-box-like domain superfamily, Leucine-rich repeat domain superfamily	GO:0005515
AeUmb.PI554389.v2.5U.G0389100	18.4116	-3.66575	0.833804	-4.39642	1.10052e-05	7.16022e-05
AeUmb.PI554389.v2.5U.G0389200	2358.27	-0.59466	0.227681	-2.61182	0.00900626	0.0272607
AeUmb.PI554389.v2.5U.G0390700	47.1719	-2.92309	0.671826	-4.35096	1.35543e-05	8.6602e-05	E3 ubiquitin ligase RBR family, IBR domain, RING-type, RING/FYVE/PHD-type, TRIAD supradomain, Zinc finger, conserved site	GO:0004842, GO:0008270, GO:0016567
AeUmb.PI554389.v2.5U.G0391000	7.73231	5.93732	1.76812	3.35798	0.000785154	0.00328256	E3 ubiquitin ligase RBR family, IBR domain, RING-type, RING/FYVE/PHD-type, TRIAD supradomain, Zinc finger, conserved site	GO:0004842, GO:0008270, GO:0016567
AeUmb.PI554389.v2.5U.G0391300	6384.24	-0.653184	0.257741	-2.53426	0.0112685	0.0330005
AeUmb.PI554389.v2.5U.G0392200	45.7982	6.72389	1.97332	3.40741	0.000655826	0.00280298	WRKY domain, WRKY domain superfamily, WRKY transcription factor, plant	GO:0003700, GO:0006355, GO:0043565
AeUmb.PI554389.v2.5U.G0392400	139.337	3.5535	1.29373	2.74671	0.00601967	0.0193431	WRKY domain, WRKY domain superfamily, WRKY transcription factor, plant	GO:0003700, GO:0006355, GO:0043565
AeUmb.PI554389.v2.5U.G0392800	1221.3	-0.392729	0.158127	-2.48362	0.0130053	0.0371674	CCR4-NOT transcription complex subunit 7/8/Pop2, Ribonuclease CAF1, Ribonuclease H superfamily, Ribonuclease H-like superfamily	GO:0003676, GO:0004535, GO:0030014
AeUmb.PI554389.v2.5U.G0393600	1091.32	1.5887	0.660842	2.40405	0.0162147	0.0446943
AeUmb.PI554389.v2.5U.G0393900	512.185	-0.737544	0.149391	-4.937	7.93332e-07	6.45828e-06	ATP-dependent 6-phosphofructokinase, Phosphofructokinase domain, Phosphofructokinase superfamily, Pyrophosphate-dependent phosphofructokinase TP0108-type	GO:0003872, GO:0005524, GO:0006002, GO:0006096
AeUmb.PI554389.v2.5U.G0395200	28.4783	1.87409	0.655837	2.85755	0.00426919	0.0144065
AeUmb.PI554389.v2.5U.G0395600	5397.16	0.425675	0.12707	3.34993	0.00080831	0.00336586
AeUmb.PI554389.v2.5U.G0395900	1157.04	0.676126	0.194788	3.47108	0.000518367	0.00226927	Type II CAAX prenyl endopeptidase Rce1-like	GO:0004222, GO:0016020, GO:0071586
AeUmb.PI554389.v2.5U.G0396400	633.455	-0.865	0.286489	-3.01931	0.00253349	0.00916693
AeUmb.PI554389.v2.5U.G0396800	311.503	2.22759	0.509323	4.37363	1.22195e-05	7.88405e-05	EF-Hand 1, EF-hand domain, EF-hand domain pair, calcium-binding site	GO:0005509
AeUmb.PI554389.v2.5U.G0396900	362.363	-0.443559	0.181357	-2.44577	0.0144542	0.0406279
AeUmb.PI554389.v2.5U.G0397100	1033.95	-0.667891	0.262117	-2.54807	0.0108322	0.0318957	Peptidyl-prolyl cis-trans isomerase, Peptidyl-prolyl cis-trans isomerase PIN4, Peptidyl-prolyl cis-trans isomerase domain superfamily, PpiC-type, conserved site	GO:0003677, GO:0003755, GO:0006364
AeUmb.PI554389.v2.5U.G0397600	10.793	6.92338	1.32952	5.20743	1.9147e-07	1.74232e-06
AeUmb.PI554389.v2.5U.G0398700	441.22	1.02749	0.241548	4.25376	2.10215e-05	0.000129278	A domain superfamily, HAD superfamily, HAD-like superfamily, P-type ATPase, cytoplasmic domain N, haloacid dehalogenase domain, phosphorylation site, subfamily IB, transmembrane domain superfamily	GO:0000166, GO:0005215, GO:0005524, GO:0006812, GO:0016020, GO:0016887, GO:0019829
AeUmb.PI554389.v2.5U.G0398800	11489.9	-0.545994	0.174844	-3.12275	0.00179171	0.006765	NAD(P)H-quinone oxidoreductase subunit L	GO:0016655
AeUmb.PI554389.v2.5U.G0399100	200.718	1.10467	0.249236	4.43224	9.32606e-06	6.15932e-05
AeUmb.PI554389.v2.5U.G0399200	230.808	-2.45035	0.346911	-7.06334	1.62543e-12	3.29472e-11
AeUmb.PI554389.v2.5U.G0399300	237.877	-1.34997	0.275369	-4.90239	9.46766e-07	7.59676e-06	Disease resistance protein, Leucine-rich repeat domain superfamily, N-terminal, NB-ARC, P-loop containing nucleoside triphosphate hydrolase, Rx, Virus X resistance protein-like, Winged helix-like DNA-binding domain superfamily, coiled-coil domain, plants	GO:0006952, GO:0043531
AeUmb.PI554389.v2.5U.G0399400	202.529	-1.2791	0.289223	-4.42253	9.75531e-06	6.41476e-05
AeUmb.PI554389.v2.5U.G0399500	103.242	-1.20714	0.459599	-2.6265	0.0086268	0.0262727
AeUmb.PI554389.v2.5U.G0400500	21.7583	-5.20427	1.62459	-3.20343	0.00135802	0.00531487
AeUmb.PI554389.v2.5U.G0400600	137.184	1.17432	0.286285	4.10193	4.09719e-05	0.000235477
AeUmb.PI554389.v2.5U.G0400700	162.659	1.04343	0.278402	3.74792	0.000178308	0.000885298
AeUmb.PI554389.v2.5U.G0401300	77.1149	1.42831	0.390002	3.6623	0.00024996	0.0011964
AeUmb.PI554389.v2.5U.G0401600	100.745	3.33202	1.0777	3.09179	0.00198951	0.00740994
AeUmb.PI554389.v2.5U.G0402300	90.4016	1.48384	0.357537	4.15016	3.3224e-05	0.00019536	Potassium transporter	GO:0015079, GO:0016020, GO:0071805
AeUmb.PI554389.v2.5U.G0402600	796.153	-0.866188	0.13803	-6.27534	3.48862e-10	4.99061e-09
AeUmb.PI554389.v2.5U.G0404300	2994.28	-1.09323	0.235994	-4.63245	3.61371e-06	2.58567e-05
AeUmb.PI554389.v2.5U.G0404400	1993.78	-1.4558	0.310596	-4.6871	2.77101e-06	2.02885e-05
AeUmb.PI554389.v2.5U.G0404700	473.169	-0.995747	0.168121	-5.9228	3.1651e-09	3.87328e-08
AeUmb.PI554389.v2.5U.G0405300	128.029	-1.35907	0.365104	-3.72242	0.000197324	0.000969511	Aspartic peptidase, Aspartic peptidase A1 family, Aspartic peptidase domain superfamily, C-terminal, N-terminal, Pepsin-like domain, Peptidase family A1 domain, Xylanase inhibitor, active site, plant	GO:0004190, GO:0006508
AeUmb.PI554389.v2.5U.G0406000	3220.62	0.386275	0.119822	3.22374	0.00126529	0.00499107	LexA/Signal peptidase-like superfamily, Peptidase S26, Peptidase S26A, conserved site, lysine active site, serine active site, signal peptidase I	GO:0004252, GO:0006465, GO:0006508, GO:0008236, GO:0016020
AeUmb.PI554389.v2.5U.G0406100	106.837	0.853266	0.31829	2.68078	0.00734502	0.0229191	Nucleoporin p58/p45/NUP49	GO:0005643, GO:0006913, GO:0008139, GO:0017056
AeUmb.PI554389.v2.5U.G0406600	2343.05	-0.912049	0.109528	-8.32707	8.28673e-17	3.10902e-15	Aminotransferase, Pyridoxal phosphate-dependent transferase, class I/classII, major domain, small domain	GO:0009058, GO:0030170
AeUmb.PI554389.v2.5U.G0407200	575.634	-0.615846	0.174783	-3.52349	0.00042591	0.00191021
AeUmb.PI554389.v2.5U.G0407500	436.759	1.29074	0.541994	2.38146	0.0172441	0.0470508	Mitochondrial carrier domain superfamily, Mitochondrial phosphate carrier protein SLC25A3/Pic2/Mir1-like, Mitochondrial substrate/solute carrier	GO:0005315, GO:1990547
AeUmb.PI554389.v2.5U.G0408000	451.164	-0.491742	0.193212	-2.54509	0.0109249	0.0321155	Alpha/Beta hydrolase fold, Alpha/beta hydrolase fold-3	GO:0016787
AeUmb.PI554389.v2.5U.G0408400	1157.55	-0.890379	0.236203	-3.76955	0.000163542	0.000818849
AeUmb.PI554389.v2.5U.G0409400	63.6473	5.90021	1.19695	4.92935	8.2502e-07	6.68381e-06	AP2/ERF domain, AP2/ERF domain superfamily, DNA-binding domain superfamily, Ethylene-responsive transcription factor	GO:0003677, GO:0003700, GO:0006355, GO:0009873
AeUmb.PI554389.v2.5U.G0409500	85.0362	-1.42961	0.39881	-3.58469	0.000337477	0.00155326
AeUmb.PI554389.v2.5U.G0410500	45.3943	1.17046	0.45779	2.55677	0.0105649	0.0312244
AeUmb.PI554389.v2.5U.G0410600	3.75215	4.98972	1.99987	2.49503	0.0125948	0.0362102
AeUmb.PI554389.v2.5U.G0410700	689.376	-0.855335	0.276486	-3.09359	0.00197751	0.00736796
AeUmb.PI554389.v2.5U.G0410800	802.51	0.774447	0.209429	3.6979	0.000217386	0.00105827
AeUmb.PI554389.v2.5U.G0412100	29.603	8.33744	1.24564	6.69328	2.18217e-11	3.73193e-10
AeUmb.PI554389.v2.5U.G0412500	88.108	1.05953	0.437031	2.42438	0.0153347	0.0426974
AeUmb.PI554389.v2.5U.G0413200	91.1834	-1.12125	0.384914	-2.91299	0.00357991	0.0123595
AeUmb.PI554389.v2.5U.G0413400	27	4.17732	0.776786	5.37769	7.54461e-08	7.34566e-07
AeUmb.PI554389.v2.5U.G0414800	250.563	1.40318	0.365958	3.83426	0.000125942	0.000647218	Alpha/Beta hydrolase fold, Alpha/beta hydrolase fold-3, GDXG, Lipase, putative serine active site	GO:0016787
AeUmb.PI554389.v2.5U.G0415100	14.1565	-6.13909	1.95504	-3.14014	0.00168867	0.00642412
AeUmb.PI554389.v2.5U.G0415300	376.693	1.10022	0.23434	4.69498	2.66634e-06	1.96125e-05	ATP binding site, Protein kinase, Protein kinase domain, Protein kinase-like domain superfamily, Serine-threonine/tyrosine-protein kinase, Serine/threonine-protein kinase, active site, catalytic domain	GO:0004672, GO:0005524, GO:0006468
AeUmb.PI554389.v2.5U.G0415600	28.2721	4.88466	0.957838	5.09967	3.40241e-07	2.96736e-06
AeUmb.PI554389.v2.5U.G0415800	33.4553	-8.04924	1.5171	-5.30568	1.12251e-07	1.06243e-06
AeUmb.PI554389.v2.5U.G0416000	3445.76	3.8204	0.363546	10.5087	7.87609e-26	8.77763e-24	Alpha/Beta hydrolase fold, Alpha/beta hydrolase fold-3, GDXG, Lipase, putative serine active site	GO:0016787
AeUmb.PI554389.v2.5U.G0417700	719.222	-0.678473	0.257753	-2.63226	0.00848188	0.0259073	Alpha/Beta hydrolase fold, Alpha/beta hydrolase fold-3	GO:0016787
AeUmb.PI554389.v2.5U.G0417900	450.755	-0.945013	0.221666	-4.26324	2.01488e-05	0.000124343	Alpha/Beta hydrolase fold, Alpha/beta hydrolase fold-3	GO:0016787
AeUmb.PI554389.v2.5U.G0418000	11.9545	3.93437	1.31765	2.9859	0.00282747	0.0100904	Ribonuclease H superfamily	GO:0003676
AeUmb.PI554389.v2.5U.G0418100	167.359	-1.04551	0.29696	-3.52073	0.000430365	0.00192761	Alpha/Beta hydrolase fold, Alpha/beta hydrolase fold-3	GO:0016787
AeUmb.PI554389.v2.5U.G0418500	85.3756	-9.72823	1.48267	-6.56128	5.33463e-11	8.58373e-10
AeUmb.PI554389.v2.5U.G0419100	1249.69	0.733733	0.210719	3.48204	0.000497604	0.00218917
AeUmb.PI554389.v2.5U.G0419300	2178.08	-0.91375	0.326827	-2.79582	0.00517676	0.0170222	HMA, Heavy metal binding protein HIPP-like, Heavy metal-associated domain, Heavy metal-associated domain superfamily	GO:0046872
AeUmb.PI554389.v2.5U.G0421300	209.438	-3.37394	0.250406	-13.4739	2.22776e-41	6.86559e-39
AeUmb.PI554389.v2.5U.G0421400	14.7305	-7.27775	1.60493	-4.53462	5.7706e-06	3.9809e-05
AeUmb.PI554389.v2.5U.G0421800	282.839	-2.39274	0.287255	-8.32966	8.10747e-17	3.04555e-15
AeUmb.PI554389.v2.5U.G0422400	349.123	-3.70456	0.321053	-11.5388	8.41279e-31	1.42743e-28
AeUmb.PI554389.v2.5U.G0424000	1662.09	-0.263562	0.0976429	-2.69924	0.00694973	0.021855	ATP binding site, Protein kinase, Protein kinase domain, Protein kinase-like domain superfamily, Serine/threonine-protein kinase, active site	GO:0004672, GO:0005524, GO:0006468
AeUmb.PI554389.v2.5U.G0424500	89.7442	2.44723	0.609588	4.01455	5.95583e-05	0.000329507
AeUmb.PI554389.v2.5U.G0424900	101.048	-2.08018	0.406727	-5.11444	3.14676e-07	2.75954e-06
AeUmb.PI554389.v2.5U.G0425400	337.007	-0.518976	0.218222	-2.3782	0.0173972	0.0474128	N-terminal, SAICAR synthetase, SAICAR synthetase/ADE2, conserved site	GO:0004639, GO:0006164
AeUmb.PI554389.v2.5U.G0425500	113.068	1.68042	0.704349	2.38578	0.017043	0.0466074	C-terminal, C-terminal alpha helical domain, C-terminal domain superfamily, C-terminal-like, Glutathione S-transferase, Glutathione S-transferase Omega/Tau-like, Glutathione S-transferases Tau, N-terminal, Thioredoxin-like superfamily, plant	GO:0004364, GO:0006749
AeUmb.PI554389.v2.5U.G0426600	145.399	1.52351	0.508541	2.99585	0.00273682	0.00980282
AeUmb.PI554389.v2.5U.G0427200	1547.96	-0.383247	0.15848	-2.41826	0.015595	0.0432825
AeUmb.PI554389.v2.5U.G0427600	269.405	1.36084	0.182429	7.45955	8.68207e-14	2.09773e-12
AeUmb.PI554389.v2.5U.G0427900	4.6231	5.77098	2.23275	2.5847	0.00974636	0.0291792
AeUmb.PI554389.v2.5U.G0428300	1092.43	-0.900178	0.243993	-3.68936	0.000224821	0.00108919	Glycogen debranching enzyme GlgX/isoamylase, Glycoside hydrolase, Glycoside hydrolase superfamily, Glycosyl hydrolase, Immunoglobulin E-set, Immunoglobulin-like fold, N-terminal, N-terminal Early set domain, all-beta, catalytic domain, family 13	GO:0004553, GO:0005975
AeUmb.PI554389.v2.5U.G0429000	69.1165	1.38298	0.414851	3.33369	0.000857019	0.00354863
AeUmb.PI554389.v2.5U.G0429200	591.296	0.542098	0.228076	2.37683	0.017462	0.0475596	Haem peroxidase, Haem peroxidase superfamily, Peroxidase, Peroxidases heam-ligand binding site, Plant peroxidase, Secretory peroxidase, active site	GO:0004601, GO:0006979, GO:0020037, GO:0042744
AeUmb.PI554389.v2.5U.G0429600	6.01042	-5.71474	1.94962	-2.9312	0.00337651	0.0117689
AeUmb.PI554389.v2.5U.G0430600	117.926	0.636228	0.270133	2.35524	0.0185108	0.0499207	PORR family, Plant organelle RNA recognition domain	GO:0003723
AeUmb.PI554389.v2.5U.G0432400	894.032	-0.688409	0.198816	-3.46254	0.000535092	0.00233269
AeUmb.PI554389.v2.5U.G0432500	45.9296	-2.23322	0.550414	-4.05734	4.9634e-05	0.000280195	Alpha/Beta hydrolase fold, N-terminal domain, Peptidase S9, Peptidase S9A, catalytic domain, prolyl oligopeptidase	GO:0004252, GO:0006508, GO:0008236
AeUmb.PI554389.v2.5U.G0433500	52.3685	1.85346	0.593366	3.12365	0.00178626	0.00674778	UDP-glucuronosyl/UDP-glucosyltransferase, UDP-glycosyltransferase family, conserved site	GO:0008194
AeUmb.PI554389.v2.5U.G0434700	221.137	2.09822	0.288903	7.26272	3.7939e-13	8.30917e-12
AeUmb.PI554389.v2.5U.G0435000	927.336	-1.46255	0.398006	-3.67468	0.000238144	0.00114584	F-box associated interaction domain, F-box domain, F-box-like domain superfamily, Galactose oxidase/kelch, beta-propeller	GO:0005515
AeUmb.PI554389.v2.5U.G0435800	47.6489	-1.52985	0.46322	-3.30264	0.000957806	0.00390861	F-box associated domain, F-box associated interaction domain, F-box domain, F-box-like domain superfamily, type 3	GO:0005515
AeUmb.PI554389.v2.5U.G0435900	15.0884	6.5266	1.39799	4.66855	3.03332e-06	2.20806e-05
AeUmb.PI554389.v2.5U.G0436000	41.7733	-1.68198	0.475713	-3.5357	0.000406698	0.00183412	F-box associated interaction domain, F-box domain, F-box-like domain superfamily	GO:0005515
AeUmb.PI554389.v2.5U.G0436200	16.4535	-7.8624	1.59291	-4.93588	7.97892e-07	6.48666e-06	F-box domain, F-box-like domain superfamily	GO:0005515
AeUmb.PI554389.v2.5U.G0437100	811.257	0.678807	0.133871	5.07061	3.96548e-07	3.40878e-06	Glycosyl transferase, Nucleotide-diphospho-sugar transferases, Plant galacturonosyltransferase GAUT, family 8	GO:0016757, GO:0047262
AeUmb.PI554389.v2.5U.G0437500	1131.5	-1.24012	0.301186	-4.11746	3.83079e-05	0.000221813	Amino acid/polyamine transporter I, C-terminal, Cationic amino acid transporter	GO:0016020, GO:0022857, GO:0055085
AeUmb.PI554389.v2.5U.G0437700	59.6671	-5.19059	1.01671	-5.10526	3.30332e-07	2.88928e-06
AeUmb.PI554389.v2.5U.G0438200	20.1284	-4.09471	0.998398	-4.10127	4.10881e-05	0.000236011
AeUmb.PI554389.v2.5U.G0438300	12.3587	-7.6486	1.51903	-5.03519	4.77363e-07	4.05233e-06
AeUmb.PI554389.v2.5U.G0439100	96.611	1.90704	0.402772	4.7348	2.1927e-06	1.64083e-05	Class I-like SAM-dependent O-methyltransferase, S-adenosyl-L-methionine-dependent methyltransferase superfamily	GO:0008171, GO:0008757
AeUmb.PI554389.v2.5U.G0439500	121.691	2.07971	0.560892	3.70786	0.000209019	0.00102127	Alpha crystallin/Hsp20 domain, HSP20-like chaperone, Heat shock protein 21-like	GO:0009408
AeUmb.PI554389.v2.5U.G0439900	30.532	1.63729	0.617353	2.65211	0.00799915	0.0246871	Pentatricopeptide repeat, Tetratricopeptide-like helical domain superfamily	GO:0005515
AeUmb.PI554389.v2.5U.G0441400	174.92	0.611605	0.208707	2.93044	0.0033848	0.011791
AeUmb.PI554389.v2.5U.G0442100	37.8962	-2.13094	0.542297	-3.92948	8.51301e-05	0.000455384
AeUmb.PI554389.v2.5U.G0442600	20919.9	0.462647	0.130667	3.54066	0.000399126	0.00180266	C-terminal domain, HSP90, Heat shock protein Hsp90, Heat shock protein Hsp90 family, Histidine kinase/HSP90-like ATPase, Histidine kinase/HSP90-like ATPase superfamily, N-terminal, Ribosomal protein uS5 domain 2-type superfamily, conserved site	GO:0005524, GO:0006457, GO:0016887, GO:0051082, GO:0140662
AeUmb.PI554389.v2.5U.G0442800	15.5076	7.54209	1.48918	5.06458	4.09294e-07	3.50581e-06	CPA1 family, Cation/H+ exchanger	GO:0006812, GO:0015297, GO:0015385, GO:0016020, GO:0055085, GO:1902600
AeUmb.PI554389.v2.5U.G0443100	41.9994	-7.17041	1.53887	-4.65952	3.16949e-06	2.30053e-05	ATP binding site, Protein kinase, Protein kinase domain, Protein kinase-like domain superfamily, Receptor-like kinase WAK-like, Serine-threonine/tyrosine-protein kinase, Serine/threonine-protein kinase, active site, catalytic domain	GO:0004672, GO:0005524, GO:0006468, GO:0007166
AeUmb.PI554389.v2.5U.G0443300	372.046	1.93454	0.754162	2.56515	0.0103132	0.0305942	Berberine/berberine-like, FAD linked oxidase, FAD-binding, FAD-binding domain, N-terminal, PCMH-type, subdomain 1, subdomain 2, type PCMH, type PCMH-like superfamily	GO:0016491, GO:0050660, GO:0071949
AeUmb.PI554389.v2.5U.G0443600	292.401	0.988037	0.278924	3.54232	0.000396626	0.00179352	AAA+ ATPase domain, Apoptotic protease-activating factors, Disease resistance protein, Leucine-rich repeat domain superfamily, N-terminal, NB-ARC, P-loop containing nucleoside triphosphate hydrolase, Rx, Virus X resistance protein-like, Winged helix-like DNA-binding domain superfamily, coiled-coil domain, helical domain, plants	GO:0006952, GO:0016887, GO:0043531
AeUmb.PI554389.v2.5U.G0444300	872.266	-0.286756	0.121267	-2.36467	0.0180463	0.0488602	Eukaryotic translation initiation factor 3 subunit E, N-terminal, Proteasome component (PCI) domain, Winged helix DNA-binding domain superfamily	GO:0003743, GO:0005737, GO:0005852
AeUmb.PI554389.v2.5U.G0444500	906.118	1.10613	0.444108	2.49068	0.0127498	0.0365653	EF-Hand 1, EF-hand domain, EF-hand domain pair, calcium-binding site	GO:0005509
AeUmb.PI554389.v2.5U.G0444900	738.989	-3.61079	0.306309	-11.7881	4.49726e-32	8.28209e-30	Cytochrome P450, Cytochrome P450 superfamily	GO:0004497, GO:0005506, GO:0016705, GO:0020037
AeUmb.PI554389.v2.5U.G0445400	62.1201	-1.65499	0.408433	-4.05204	5.07719e-05	0.000286085
AeUmb.PI554389.v2.5U.G0445500	2985.4	2.9874	0.458002	6.52268	6.90605e-11	1.09317e-09
AeUmb.PI554389.v2.5U.G0446000	557.913	1.45483	0.363924	3.99763	6.39806e-05	0.00035159
AeUmb.PI554389.v2.5U.G0446200	577.259	1.8816	0.481025	3.91166	9.16647e-05	0.000486804
AeUmb.PI554389.v2.5U.G0446400	1928.33	2.18483	0.537161	4.06737	4.75462e-05	0.000269366	Solute carrier family 13	GO:0016020, GO:0022857, GO:0055085
AeUmb.PI554389.v2.5U.G0446600	11.7108	-5.91845	1.8303	-3.2336	0.0012224	0.00484564
AeUmb.PI554389.v2.5U.G0447900	33.8309	-4.40893	0.725636	-6.07595	1.23252e-09	1.61215e-08	Alpha/Beta hydrolase fold, Peptidase S10, serine carboxypeptidase	GO:0004185, GO:0006508
AeUmb.PI554389.v2.5U.G0448000	294.299	1.02436	0.330347	3.10085	0.00192965	0.00720923	Alpha/Beta hydrolase fold, Peptidase S10, serine carboxypeptidase	GO:0004185, GO:0006508
AeUmb.PI554389.v2.5U.G0448100	335.695	1.0976	0.374479	2.93101	0.00337863	0.0117738	Nucleoporin Nup186/Nup192/Nup205	GO:0005643
AeUmb.PI554389.v2.5U.G0448200	3.22999	5.41313	2.26273	2.3923	0.016743	0.0459159	F-box-like domain superfamily	GO:0005515
AeUmb.PI554389.v2.5U.G0449600	486.026	-0.422579	0.174935	-2.41563	0.015708	0.0435128
AeUmb.PI554389.v2.5U.G0450400	988.668	0.677885	0.233806	2.89934	0.00373944	0.0128412	Helix-loop-helix DNA-binding domain superfamily, Myc-type, Transcription factor bHLH95-like, basic helix-loop-helix (bHLH) domain, basic helix-loop-helix domain	GO:0046983
AeUmb.PI554389.v2.5U.G0452200	5101	-4.1365	0.327485	-12.6311	1.42256e-36	3.33056e-34	Glycoside hydrolase family 1, Glycoside hydrolase superfamily, Glycosyl hydrolases family 1, N-terminal conserved site	GO:0004553, GO:0005975
AeUmb.PI554389.v2.5U.G0453300	847.455	0.402081	0.163996	2.45177	0.0142155	0.0400687
AeUmb.PI554389.v2.5U.G0454600	1724.39	0.637048	0.197147	3.23134	0.00123213	0.00487843	ATPase, C-terminal domain superfamily, Chaperone DnaK, Heat shock protein 70, Heat shock protein 70 family, Heat shock protein 70kD, conserved site, nucleotide binding domain, peptide-binding domain superfamily	GO:0005524, GO:0006457, GO:0051082, GO:0140662
AeUmb.PI554389.v2.5U.G0454900	409.002	-6.86294	0.88714	-7.73602	1.02576e-14	2.82407e-13
AeUmb.PI554389.v2.5U.G0455100	29.5585	3.74122	0.996247	3.75531	0.000173124	0.000862251
AeUmb.PI554389.v2.5U.G0455400	98.4738	2.3616	0.878633	2.68781	0.00719225	0.0225145	NAD(P)-binding domain superfamily, Short-chain dehydrogenase/reductase, Short-chain dehydrogenase/reductase SDR, conserved site	GO:0016491
AeUmb.PI554389.v2.5U.G0455500	52.904	-1.32565	0.45188	-2.93363	0.00335026	0.0116895
AeUmb.PI554389.v2.5U.G0455600	9.47887	7.02062	1.73839	4.03858	5.37746e-05	0.000300982
AeUmb.PI554389.v2.5U.G0456100	12.4618	-6.56728	1.62046	-4.05273	5.06243e-05	0.000285466
AeUmb.PI554389.v2.5U.G0456200	916.206	0.521521	0.205801	2.5341	0.0112735	0.0330021
AeUmb.PI554389.v2.5U.G0457700	68.899	9.41076	1.21386	7.75275	8.9922e-15	2.50076e-13
AeUmb.PI554389.v2.5U.G0458900	235.364	-0.858699	0.222675	-3.85629	0.000115122	0.000597099
AeUmb.PI554389.v2.5U.G0459200	24.8425	7.46172	1.23051	6.06393	1.32831e-09	1.72772e-08	F-box domain, F-box-like domain superfamily, Leucine-rich repeat domain superfamily	GO:0005515
AeUmb.PI554389.v2.5U.G0460300	108.846	-1.8146	0.350441	-5.17804	2.2423e-07	2.00956e-06	Anaphase-promoting complex subunit 4-like, WD repeat Cdc20/Fizzy, WD40 domain, WD40 repeat, WD40-repeat-containing domain superfamily, WD40/YVTN repeat-like-containing domain superfamily, conserved site	GO:0005515, GO:0010997, GO:0097027, GO:1904668
AeUmb.PI554389.v2.5U.G0460700	218.768	2.4445	0.419806	5.82292	5.78287e-09	6.71747e-08
AeUmb.PI554389.v2.5U.G0460800	501.751	4.31305	0.329993	13.0701	4.87774e-39	1.31534e-36
AeUmb.PI554389.v2.5U.G0461300	119.516	1.72916	0.308463	5.60572	2.07392e-08	2.20862e-07
AeUmb.PI554389.v2.5U.G0462200	9.82586	6.12804	1.31991	4.64276	3.43791e-06	2.4716e-05
AeUmb.PI554389.v2.5U.G0462900	19.4575	7.57065	1.23471	6.13152	8.70444e-10	1.16633e-08
AeUmb.PI554389.v2.5U.G0463000	1392.06	11.9392	1.04171	11.4612	2.06666e-30	3.35577e-28
AeUmb.PI554389.v2.5U.G0463300	11.903	5.61867	1.18268	4.75081	2.02599e-06	1.52743e-05
AeUmb.PI554389.v2.5U.G0463400	48.3501	2.71003	0.530314	5.11024	3.21749e-07	2.81993e-06
AeUmb.PI554389.v2.5U.G0463500	218.895	9.22451	1.0401	8.86888	7.3882e-19	3.60482e-17
AeUmb.PI554389.v2.5U.G0464100	14.9626	7.09867	1.29622	5.47644	4.33965e-08	4.39819e-07
AeUmb.PI554389.v2.5U.G0464500	52.0814	8.32007	1.21352	6.85613	7.07532e-12	1.30697e-10
AeUmb.PI554389.v2.5U.G0464600	51.4275	8.49206	1.22217	6.94837	3.69524e-12	7.10852e-11
AeUmb.PI554389.v2.5U.G0464700	49.3965	8.48304	1.23245	6.88309	5.85661e-12	1.0966e-10
AeUmb.PI554389.v2.5U.G0464800	68.2028	1.90089	0.440334	4.31691	1.58225e-05	9.9619e-05
AeUmb.PI554389.v2.5U.G0464900	34.3871	-1.51608	0.519912	-2.91604	0.00354504	0.0122559
AeUmb.PI554389.v2.5U.G0465800	1728.75	0.47795	0.160535	2.97722	0.00290871	0.0103461	ER membrane protein complex subunit 3, Integral membrane protein EMC3/TMCO1-like	GO:0016020
AeUmb.PI554389.v2.5U.G0466000	422.415	-1.01496	0.17359	-5.84689	5.00842e-09	5.89725e-08	F-box domain, F-box-like domain superfamily, FBD domain, Leucine-rich repeat domain superfamily	GO:0005515
AeUmb.PI554389.v2.5U.G0466700	17.4406	2.41697	0.886522	2.72635	0.00640381	0.0204124
AeUmb.PI554389.v2.5U.G0466900	86.542	-1.03684	0.373376	-2.77694	0.00548728	0.0178758	NAC domain, NAC domain superfamily	GO:0003677, GO:0006355
AeUmb.PI554389.v2.5U.G0467200	198.187	0.725454	0.210847	3.44067	0.000580286	0.00251266
AeUmb.PI554389.v2.5U.G0467300	1455.51	2.45132	0.474841	5.16239	2.43816e-07	2.17027e-06	FAD dependent oxidoreductase, FAD/NAD(P)-binding domain superfamily, MTOX family	GO:0016491, GO:0050660
AeUmb.PI554389.v2.5U.G0468000	63.3164	3.61596	0.708594	5.10301	3.34298e-07	2.91721e-06	FAD dependent oxidoreductase, FAD/NAD(P)-binding domain superfamily, MTOX family	GO:0016491, GO:0050660
AeUmb.PI554389.v2.5U.G0469000	94.7451	5.75047	0.776359	7.40697	1.29214e-13	3.04884e-12	A domain superfamily, C-terminal, Calcium-transporting P-type ATPase, Cation-transporting P-type ATPase, HAD superfamily, HAD-like superfamily, N-terminal, N-terminal autoinhibitory domain, P-type ATPase, cytoplasmic domain N, haloacid dehalogenase domain, phosphorylation site, subfamily IIB, transmembrane domain superfamily	GO:0000166, GO:0005215, GO:0005388, GO:0005516, GO:0005524, GO:0016020, GO:0016887, GO:0070588
AeUmb.PI554389.v2.5U.G0469300	106.778	1.8731	0.363068	5.15909	2.48156e-07	2.20696e-06	F-box-like domain superfamily, Leucine-rich repeat domain superfamily	GO:0005515
AeUmb.PI554389.v2.5U.G0471000	10.0865	3.51776	1.37553	2.55738	0.0105463	0.0311878	Homeobox-like domain superfamily, SANT/Myb domain, Transcription factor RADIALIS-like	GO:0003700
AeUmb.PI554389.v2.5U.G0471100	6.15792	4.58372	1.51759	3.0204	0.00252444	0.0091364	Homeobox-like domain superfamily, SANT/Myb domain, Transcription factor RADIALIS-like	GO:0003700
AeUmb.PI554389.v2.5U.G0471500	3.41652	-5.89005	2.42104	-2.43285	0.0149803	0.0418728
AeUmb.PI554389.v2.5U.G0471800	2145.55	-0.638635	0.1383	-4.61774	3.87941e-06	2.75944e-05	Basic helix-loop-helix leucine zipper transcription factor, Helix-loop-helix DNA-binding domain superfamily, Myc-type, basic helix-loop-helix (bHLH) domain	GO:0006355, GO:0046983
AeUmb.PI554389.v2.5U.G0472800	10.0849	5.57787	1.49929	3.72034	0.000198954	0.000976567	RNA-binding domain superfamily	GO:0003676
AeUmb.PI554389.v2.5U.G0473000	67.3641	3.46683	1.39951	2.47718	0.0132426	0.0377386	Alcohol dehydrogenase-like, GroES-like superfamily, N-terminal, NAD(P)-binding domain superfamily, Polyketide synthase, enoylreductase domain	GO:0016491
AeUmb.PI554389.v2.5U.G0473100	12.1961	6.40139	1.35962	4.70823	2.49871e-06	1.84694e-05
AeUmb.PI554389.v2.5U.G0473200	4.33661	5.02278	1.60525	3.12898	0.00175416	0.00664399	F-box domain, F-box-like domain superfamily, Leucine-rich repeat domain superfamily	GO:0005515
AeUmb.PI554389.v2.5U.G0473400	2411.62	-1.06756	0.293235	-3.64063	0.000271972	0.00128788	Alcohol dehydrogenase-like, GroES-like superfamily, N-terminal, NAD(P)-binding domain superfamily, Polyketide synthase, enoylreductase domain	GO:0016491
AeUmb.PI554389.v2.5U.G0473800	62.2798	2.38961	0.515485	4.63567	3.55791e-06	2.54997e-05	F-box domain, F-box-like domain superfamily, Leucine-rich repeat domain superfamily	GO:0005515
AeUmb.PI554389.v2.5U.G0474400	97.5109	3.94113	0.433823	9.08465	1.04032e-19	5.72306e-18
AeUmb.PI554389.v2.5U.G0475500	252.51	0.520692	0.199303	2.61257	0.0089864	0.0272142	F-box-like domain superfamily, FBD domain, Leucine-rich repeat domain superfamily	GO:0005515
AeUmb.PI554389.v2.5U.G0476700	98.5108	-9.44166	1.49641	-6.30953	2.79892e-10	4.06213e-09
AeUmb.PI554389.v2.5U.G0477100	428.556	-0.656728	0.178504	-3.67906	0.000234094	0.00112815
AeUmb.PI554389.v2.5U.G0478600	3.25761	-6.09146	2.48423	-2.45206	0.0142042	0.0400406	Protein of unknown function DUF6598, S-phase kinase-associated protein 1-like, SKP1 component, SKP1-like, SKP1/BTB/POZ domain superfamily, dimerisation, dimerisation domain superfamily	GO:0006511
AeUmb.PI554389.v2.5U.G0478900	62.4427	-1.01828	0.387647	-2.62683	0.00861847	0.026258
AeUmb.PI554389.v2.5U.G0479000	9.00163	-4.42258	1.40657	-3.14422	0.00166528	0.00634635
AeUmb.PI554389.v2.5U.G0479100	28.3304	-8.14133	1.60219	-5.08137	3.74721e-07	3.23908e-06
AeUmb.PI554389.v2.5U.G0479400	37.4539	-4.51846	0.848725	-5.32382	1.01612e-07	9.69628e-07
AeUmb.PI554389.v2.5U.G0479500	12.1285	-7.13207	1.55897	-4.57486	4.76535e-06	3.34161e-05
AeUmb.PI554389.v2.5U.G0480900	1135.54	-1.05524	0.169418	-6.22861	4.70602e-10	6.5832e-09	Carbon-nitrogen hydrolase, Carbon-nitrogen hydrolase superfamily	GO:0006807
AeUmb.PI554389.v2.5U.G0481100	915.844	-0.678571	0.149081	-4.55168	5.3219e-06	3.70094e-05
AeUmb.PI554389.v2.5U.G0481700	102.252	1.09184	0.376717	2.89831	0.00375181	0.0128793
AeUmb.PI554389.v2.5U.G0482500	795.709	0.416348	0.176428	2.35987	0.0182812	0.0494031	Carbohydrate kinase PfkB, Carbohydrate/purine kinase, PfkB, Ribokinase-like, Ribokinase/fructokinase, conserved site	GO:0016301
AeUmb.PI554389.v2.5U.G0482800	108.481	1.02545	0.323258	3.17223	0.00151274	0.00583644
AeUmb.PI554389.v2.5U.G0483500	165.47	-1.01774	0.222729	-4.56942	4.89082e-06	3.42561e-05
AeUmb.PI554389.v2.5U.G0484700	21.7043	7.58024	1.25468	6.04157	1.52622e-09	1.96399e-08
AeUmb.PI554389.v2.5U.G0484800	102.505	9.5005	1.2268	7.74416	9.62186e-15	2.66361e-13
AeUmb.PI554389.v2.5U.G0484900	10.4887	6.35654	1.2949	4.90891	9.15844e-07	7.37805e-06
AeUmb.PI554389.v2.5U.G0486100	944.595	0.716221	0.25477	2.81125	0.00493495	0.0163499	NTF2-like domain superfamily, Nuclear transport factor 2, Nuclear transport factor 2 domain, eukaryote	GO:0006913
AeUmb.PI554389.v2.5U.G0486300	4.11925	6.3982	1.67937	3.80989	0.000139028	0.00070856
AeUmb.PI554389.v2.5U.G0486400	15.9061	1.9903	0.682709	2.9153	0.00355346	0.0122836
AeUmb.PI554389.v2.5U.G0486500	694.029	-3.16946	0.232112	-13.6549	1.88841e-42	6.26746e-40	N-terminal, N-terminal domain, Nucleophile aminohydrolases, Proteasome, Proteasome alpha-subunit, Proteasome alpha-type subunit, subunit alpha/beta	GO:0005839, GO:0006511, GO:0019773, GO:0051603
AeUmb.PI554389.v2.5U.G0487000	204.615	-2.01119	0.403079	-4.98957	6.05152e-07	5.04327e-06	Cytochrome P450, Cytochrome P450 superfamily, E-class, conserved site, group I	GO:0004497, GO:0005506, GO:0016705, GO:0020037
AeUmb.PI554389.v2.5U.G0487300	203.888	4.72063	0.309699	15.2426	1.84303e-52	9.93984e-50	F-box-like domain superfamily, Leucine-rich repeat domain superfamily	GO:0005515
AeUmb.PI554389.v2.5U.G0487500	933.806	2.25474	0.165451	13.6278	2.73761e-42	8.89046e-40	N-terminal, N-terminal domain, Nucleophile aminohydrolases, Proteasome, Proteasome alpha-subunit, Proteasome alpha-type subunit, subunit alpha/beta	GO:0005839, GO:0006511, GO:0019773, GO:0051603
AeUmb.PI554389.v2.5U.G0488100	986.815	3.0364	0.282126	10.7626	5.17076e-27	6.34827e-25	Cytochrome P450, Cytochrome P450 superfamily, E-class, conserved site, group I	GO:0004497, GO:0005506, GO:0016705, GO:0020037
AeUmb.PI554389.v2.5U.G0490400	48.5632	1.5037	0.502293	2.99368	0.00275638	0.00986351
AeUmb.PI554389.v2.5U.G0490700	217.14	-1.12467	0.291153	-3.86281	0.000112088	0.000582765
AeUmb.PI554389.v2.5U.G0490800	251.282	2.16724	0.282657	7.66736	1.75574e-14	4.69263e-13
AeUmb.PI554389.v2.5U.G0490900	383.892	1.00679	0.203713	4.94221	7.72412e-07	6.30327e-06
AeUmb.PI554389.v2.5U.G0491200	466.93	7.99923	0.534374	14.9693	1.16474e-50	5.76679e-48
AeUmb.PI554389.v2.5U.G0493000	38.2641	-3.58544	1.046	-3.42775	0.000608595	0.00262395	Alpha/Beta hydrolase fold, Diacylglycerol acyltransferase, S33, Serine aminopeptidase	GO:0008374
AeUmb.PI554389.v2.5U.G0493500	87.328	-7.58616	1.12965	-6.71547	1.87462e-11	3.22973e-10	Disease resistance protein, Leucine-rich repeat domain superfamily, N-terminal, NB-ARC, P-loop containing nucleoside triphosphate hydrolase, Rx, Winged helix-like DNA-binding domain superfamily, plants	GO:0006952, GO:0043531
AeUmb.PI554389.v2.5U.G0493800	4.8117	5.27534	1.7268	3.05498	0.00225072	0.0082666
AeUmb.PI554389.v2.5U.G0494200	4.53684	4.98676	1.77857	2.8038	0.00505038	0.0166647
AeUmb.PI554389.v2.5U.G0494900	769.96	-0.671026	0.157163	-4.26962	1.9581e-05	0.000121111
AeUmb.PI554389.v2.5U.G0495900	42.3682	3.69381	0.802133	4.60498	4.12503e-06	2.91903e-05
AeUmb.PI554389.v2.5U.G0496100	57.2495	6.65088	0.977578	6.80342	1.02163e-11	1.841e-10
AeUmb.PI554389.v2.5U.G0497400	293.179	-0.867615	0.307222	-2.82406	0.00474193	0.0157866	Protein kinase domain, Protein kinase-like domain superfamily, RING/FYVE/PHD-type, Rossmann-like alpha/beta/alpha sandwich fold, Serine/threonine-protein kinase, U-box domain, Zinc finger, active site	GO:0004672, GO:0004842, GO:0005524, GO:0006468, GO:0016567
AeUmb.PI554389.v2.5U.G0497700	30.0028	3.97903	0.783916	5.07583	3.85802e-07	3.32629e-06
AeUmb.PI554389.v2.5U.G0498200	7.78223	-6.74996	1.62493	-4.15399	3.26721e-05	0.000192389
AeUmb.PI554389.v2.5U.G0499200	53.8081	8.83909	1.21909	7.25054	4.15108e-13	9.039e-12
AeUmb.PI554389.v2.5U.G0500300	1498.4	0.580406	0.213483	2.71874	0.00655311	0.0208049	Glycoside hydrolase family 1, Glycoside hydrolase superfamily, Glycosyl hydrolases family 1, N-terminal conserved site	GO:0004553, GO:0005975
AeUmb.PI554389.v2.5U.G0500600	61.5762	-3.04905	0.869792	-3.50549	0.000455767	0.00202734	Glycoside hydrolase family 1, Glycoside hydrolase superfamily, Glycosyl hydrolases family 1, N-terminal conserved site	GO:0004553, GO:0005975
AeUmb.PI554389.v2.5U.G0500700	7443.79	-0.610618	0.157306	-3.88172	0.000103722	0.000543669	Glycoside hydrolase family 1, Glycoside hydrolase superfamily, Glycosyl hydrolases family 1, N-terminal conserved site	GO:0004553, GO:0005975
AeUmb.PI554389.v2.5U.G0501000	7.41342	5.81844	1.38438	4.20291	2.63509e-05	0.000158441
AeUmb.PI554389.v2.5U.G0501300	3597.62	-1.89895	0.266381	-7.12871	1.0131e-12	2.11311e-11	DNA repair RAD52-like protein	GO:0000724, GO:0003677
AeUmb.PI554389.v2.5U.G0501500	1923.33	-0.371174	0.138687	-2.67635	0.00744292	0.0231863	WW domain-binding protein 2-like	GO:0003713
AeUmb.PI554389.v2.5U.G0501600	525.255	1.08877	0.202234	5.38372	7.29632e-08	7.13151e-07	Disease resistance protein, Leucine-rich repeat domain superfamily, NB-ARC, P-loop containing nucleoside triphosphate hydrolase, Winged helix-like DNA-binding domain superfamily, plants	GO:0006952, GO:0043531
AeUmb.PI554389.v2.5U.G0501700	8.63501	6.66851	1.63472	4.0793	4.51715e-05	0.000257167
AeUmb.PI554389.v2.5U.G0501800	16.6918	7.51926	1.28637	5.84533	5.0555e-09	5.93952e-08
AeUmb.PI554389.v2.5U.G0502000	355.436	5.36834	0.428615	12.5249	5.45873e-36	1.23958e-33	Disease resistance protein, Leucine-rich repeat domain superfamily, NB-ARC, P-loop containing nucleoside triphosphate hydrolase, Winged helix-like DNA-binding domain superfamily, plants	GO:0006952, GO:0043531
AeUmb.PI554389.v2.5U.G0502100	248.628	4.80475	0.358641	13.3971	6.28895e-41	1.89939e-38	Protein MIZU-KUSSEI 1-like, plant	GO:0010274
AeUmb.PI554389.v2.5U.G0502600	346.987	-1.0111	0.18461	-5.47697	4.32682e-08	4.38666e-07	Alpha/Beta hydrolase fold, Lecithin:cholesterol/phospholipid:diacylglycerol acyltransferase	GO:0006629, GO:0008374
AeUmb.PI554389.v2.5U.G0502700	33.1149	-2.99955	0.66659	-4.49983	6.80065e-06	4.62389e-05	Alpha/Beta hydrolase fold, Lecithin:cholesterol/phospholipid:diacylglycerol acyltransferase	GO:0006629, GO:0008374
AeUmb.PI554389.v2.5U.G0502800	157.59	0.575418	0.235462	2.44379	0.0145341	0.0408143	Dolichol-phosphate mannosyltransferase subunit 3	GO:0006486
AeUmb.PI554389.v2.5U.G0502900	40.4269	-2.0651	0.512447	-4.02989	5.58035e-05	0.000311242	Solute carrier family 35 member SLC35F1/F2/F6	GO:0016020, GO:0022857, GO:0055085
AeUmb.PI554389.v2.5U.G0504900	61.4933	-11.1398	1.54522	-7.20923	5.62712e-13	1.20749e-11	ATPase, C-terminal domain superfamily, Endoplasmic reticulum chaperone BIP, Heat shock protein 70, Heat shock protein 70 family, Heat shock protein 70kD, conserved site, nucleotide binding domain, nucleotide-binding domain, peptide-binding domain superfamily	GO:0005524, GO:0140662
AeUmb.PI554389.v2.5U.G0505100	37.9046	3.12806	0.773458	4.04425	5.24908e-05	0.000294507
AeUmb.PI554389.v2.5U.G0505500	21.4565	6.13015	1.23478	4.96459	6.88462e-07	5.67183e-06
AeUmb.PI554389.v2.5U.G0507500	233.871	1.26621	0.477026	2.65438	0.00794554	0.0245394	Cytochrome b245, EF-Hand 1, EF-hand domain, EF-hand domain pair, FAD-binding 8, FAD-binding domain, Ferredoxin-NADP reductase (FNR), Ferric reductase, Ferric reductase transmembrane component-like domain, NAD binding domain, NADPH oxidase Respiratory burst, Riboflavin synthase-like beta-barrel, calcium-binding site, ferredoxin reductase-type, heavy chain, nucleotide-binding domain	GO:0004601, GO:0005509, GO:0016020, GO:0016491, GO:0050664
AeUmb.PI554389.v2.5U.G0508900	3110.86	1.70891	0.321483	5.31571	1.06245e-07	1.01224e-06	CDGSH iron-sulfur domain, CDGSH iron-sulfur domain-containing protein 1/2, CDGSH type, Iron-binding zinc finger, MitoNEET	GO:0010506, GO:0043231, GO:0051537
AeUmb.PI554389.v2.5U.G0509400	9583.11	0.532547	0.170215	3.12868	0.00175592	0.006649	Cysteine synthase, Cysteine synthase CysK, Cysteine synthase/cystathionine beta-synthase, PALP domain, PALP domain superfamily, Tryptophan synthase beta chain-like, pyridoxal-phosphate attachment site	GO:0004124, GO:0006535
AeUmb.PI554389.v2.5U.G0510200	83.9884	2.73287	0.478485	5.71152	1.11971e-08	1.24834e-07	E motif, Pentatricopeptide repeat, Pentatricopeptide repeat-containing protein At4g14850-like, Tetratricopeptide-like helical domain superfamily, plant	GO:0003723, GO:0005515, GO:0009451
AeUmb.PI554389.v2.5U.G0510900	699.058	-0.58563	0.207866	-2.81735	0.00484223	0.0160903	C-terminal, Nucleotide-binding alpha-beta plait domain superfamily, RNA recognition motif domain, RNA-binding domain superfamily, Spen paralogue and orthologue SPOC	GO:0003676, GO:0003723
AeUmb.PI554389.v2.5U.G0511800	2934.86	-0.35363	0.13298	-2.65928	0.0078308	0.0242222	C-terminal domain, Hydroxyacylglutathione hydrolase, MBL domain, Metallo-beta-lactamase, Ribonuclease Z/Hydroxyacylglutathione hydrolase-like	GO:0004416, GO:0019243
AeUmb.PI554389.v2.5U.G0512100	870.45	-0.474056	0.138205	-3.43008	0.000603396	0.00260377
AeUmb.PI554389.v2.5U.G0512400	1342.72	-0.865411	0.152206	-5.6858	1.30203e-08	1.43781e-07	Alcohol dehydrogenase-like, C-terminal, GroES-like superfamily, Medium-chain dehydrogenase/reductase, N-terminal domain, NAD(P)-binding domain superfamily, Oxidoreductase, Polyketide synthase, enoylreductase domain	GO:0016491, GO:0016628
AeUmb.PI554389.v2.5U.G0512600	54.9379	-8.49488	1.73198	-4.90471	9.35647e-07	7.52154e-06	Alcohol dehydrogenase-like, C-terminal, GroES-like superfamily, Medium-chain dehydrogenase/reductase, N-terminal domain, NAD(P)-binding domain superfamily, Oxidoreductase, Polyketide synthase, enoylreductase domain	GO:0016491, GO:0016628
AeUmb.PI554389.v2.5U.G0513700	984.407	-0.490007	0.124149	-3.94694	7.91572e-05	0.000425014
AeUmb.PI554389.v2.5U.G0514000	87.6463	9.70919	1.42411	6.81774	9.24824e-12	1.6806e-10	Apoptotic protease-activating factors, Disease resistance protein, Leucine-rich repeat domain superfamily, NB-ARC, P-loop containing nucleoside triphosphate hydrolase, Winged helix-like DNA-binding domain superfamily, helical domain, plants	GO:0006952, GO:0043531
AeUmb.PI554389.v2.5U.G0514300	18.6779	3.44091	0.940269	3.6595	0.000252707	0.00120725
AeUmb.PI554389.v2.5U.G0516800	265.917	-1.50189	0.291088	-5.15958	2.47505e-07	2.20181e-06	ATP-grasp domain, Inositol 1,3,4-trisphosphate 5/6-kinase, Inositol-tetrakisphosphate 1-kinase	GO:0000287, GO:0005524, GO:0032957, GO:0047325, GO:0052725, GO:0052726
AeUmb.PI554389.v2.5U.G0517100	18.3168	-7.21534	1.63443	-4.41459	1.01203e-05	6.63167e-05	Serpin domain, Serpin family, Serpin superfamily, domain 1, domain 2	GO:0004867, GO:0005615
AeUmb.PI554389.v2.5U.G0517300	21.2814	-3.64846	1.10348	-3.30632	0.000945304	0.00386229	Apoptotic protease-activating factors, Disease resistance protein, Leucine-rich repeat domain superfamily, N-terminal, NB-ARC, P-loop containing nucleoside triphosphate hydrolase, Rx, Virus X resistance protein-like, Winged helix-like DNA-binding domain superfamily, coiled-coil domain, helical domain, plants	GO:0006952, GO:0043531
AeUmb.PI554389.v2.5U.G0518900	120.04	-4.178	0.731833	-5.70895	1.13675e-08	1.26454e-07
AeUmb.PI554389.v2.5U.G0519600	1012.65	-0.51151	0.164077	-3.11749	0.00182396	0.00687129	C-terminal, Homeobox-like domain superfamily, Myb domain, Pre-mRNA splicing factor component CDC5L/Cef1, Pre-mRNA splicing factor component Cdc5p/Cef1, SANT/Myb domain, second SANT/myb-like domain	GO:0000398, GO:0000974
AeUmb.PI554389.v2.5U.G0520400	50.5061	8.5349	1.23093	6.93372	4.09925e-12	7.81601e-11
AeUmb.PI554389.v2.5U.G0520500	3.41865	5.43976	1.56872	3.46764	0.000525056	0.0022939	Basic-leucine zipper domain, Basic-leucine zipper domain superfamily, RF2-like transcription factor, bZIP domain	GO:0003700, GO:0006355
AeUmb.PI554389.v2.5U.G0520600	13.7573	2.26091	0.906081	2.49526	0.0125865	0.0361968
AeUmb.PI554389.v2.5U.G0521000	1619.05	-0.501432	0.200812	-2.49702	0.0125241	0.0360446	ATP-binding domain, ATP-dependent RNA helicase DEAD-box, C-terminal, DEAD/DEAH box helicase domain, GUCT, Helicase, Helicase superfamily 1/2, P-loop containing nucleoside triphosphate hydrolase, RNA-binding domain superfamily, conserved site	GO:0003676, GO:0003723, GO:0004386, GO:0005524
AeUmb.PI554389.v2.5U.G0521300	77.7066	-1.16372	0.427915	-2.7195	0.00653802	0.0207701	TCP, Transcription factor, Transcription factor TCP subgroup	GO:0003700
AeUmb.PI554389.v2.5U.G0522900	137.417	-1.51452	0.280996	-5.38984	7.05222e-08	6.91754e-07	5'-3' exonuclease, C-terminal domain superfamily, N-terminal, PIN-like domain superfamily, XPG, XPG-I domain, XPG/Rad2 endonuclease	GO:0004518
AeUmb.PI554389.v2.5U.G0523000	28.4061	-3.10906	0.728142	-4.26986	1.95599e-05	0.000121005	AP2/ERF domain, AP2/ERF domain superfamily, DNA-binding domain superfamily, Dehydration-responsive element-binding protein 1A-I	GO:0003677, GO:0003700, GO:0006355
AeUmb.PI554389.v2.5U.G0523200	365.572	-1.55012	0.41674	-3.71963	0.000199513	0.000979151	AP2/ERF domain, AP2/ERF domain superfamily, DNA-binding domain superfamily, Dehydration-responsive element-binding protein 1A-I	GO:0003677, GO:0003700, GO:0006355
AeUmb.PI554389.v2.5U.G0523300	22.5312	8.06846	1.33146	6.05986	1.36242e-09	1.77055e-08
AeUmb.PI554389.v2.5U.G0523400	133.72	1.6171	0.365729	4.42158	9.79837e-06	6.43887e-05
AeUmb.PI554389.v2.5U.G0523500	39.3338	1.41426	0.485361	2.91383	0.00357021	0.012333
AeUmb.PI554389.v2.5U.G0523600	196.644	1.65934	0.27484	6.03749	1.5653e-09	2.00999e-08
AeUmb.PI554389.v2.5U.G0524100	5.71637	6.33226	2.02151	3.13243	0.00173363	0.0065753	AP2/ERF domain, AP2/ERF domain superfamily, DNA-binding domain superfamily, Dehydration-responsive element-binding protein 1A-I	GO:0003677, GO:0003700, GO:0006355
AeUmb.PI554389.v2.5U.G0524400	584.539	1.44735	0.351012	4.12338	3.7336e-05	0.000216851	AP2/ERF domain, AP2/ERF domain superfamily, DNA-binding domain superfamily, Dehydration-responsive element-binding protein 1A-I	GO:0003677, GO:0003700, GO:0006355
AeUmb.PI554389.v2.5U.G0524600	257.118	-1.08985	0.415198	-2.62489	0.00866764	0.0263705	AP2/ERF domain, AP2/ERF domain superfamily, DNA-binding domain superfamily, Dehydration-responsive element-binding protein 1A-I	GO:0003677, GO:0003700, GO:0006355
AeUmb.PI554389.v2.5U.G0525000	14.1553	-3.06909	1.21003	-2.53638	0.0112006	0.032814	AP2/ERF domain, AP2/ERF domain superfamily, DNA-binding domain superfamily, Dehydration-responsive element-binding protein 1A-I	GO:0003677, GO:0003700, GO:0006355
AeUmb.PI554389.v2.5U.G0525400	378.074	1.38544	0.263368	5.26046	1.43694e-07	1.33698e-06	AP2/ERF domain, AP2/ERF domain superfamily, DNA-binding domain superfamily, Dehydration-responsive element-binding protein 1A-I	GO:0003677, GO:0003700, GO:0006355
AeUmb.PI554389.v2.5U.G0525900	84.7405	2.64082	0.523869	5.041	4.63115e-07	3.94111e-06
AeUmb.PI554389.v2.5U.G0526900	2587.28	0.554957	0.215421	2.57615	0.00999067	0.0297837	BAG domain, BAG domain superfamily, Molecular chaperone regulator BAG, Ubiquitin-like domain, Ubiquitin-like domain superfamily	GO:0005515, GO:0051087
AeUmb.PI554389.v2.5U.G0527000	345.528	0.722389	0.159726	4.52268	6.10626e-06	4.18949e-05
AeUmb.PI554389.v2.5U.G0527300	492.675	1.10494	0.200632	5.50729	3.64392e-08	3.73824e-07	F-box domain, F-box-like domain superfamily, Phloem protein 2-like	GO:0005515
AeUmb.PI554389.v2.5U.G0527500	2133.86	-0.782022	0.260466	-3.00239	0.00267864	0.00962381	IRX15/GXM/AGM	GO:0045492
AeUmb.PI554389.v2.5U.G0527700	561.933	-0.405939	0.135227	-3.00192	0.00268284	0.00963084	UBA-like superfamily, UBX domain, Ubiquitin-like domain superfamily	GO:0005515
AeUmb.PI554389.v2.5U.G0528000	41.3137	-1.69659	0.712157	-2.38233	0.0172037	0.0469702
AeUmb.PI554389.v2.5U.G0528800	1439.81	-0.401193	0.146205	-2.74405	0.00606861	0.0194797	Homeobox, Homeobox domain, Homeobox-leucine zipper protein GLABRA2/ANL2/PDF2/ATML1-like, Homeobox-like domain superfamily, START domain, conserved site	GO:0000981, GO:0003677, GO:0006355, GO:0008289
AeUmb.PI554389.v2.5U.G0529900	2814.29	1.4321	0.354402	4.04089	5.32488e-05	0.000298205	NAD(P)-binding domain, NAD(P)-binding domain superfamily, UDP-glucose 4-epimerase	GO:0003978, GO:0006012
AeUmb.PI554389.v2.5U.G0530500	4.31356	-5.81074	1.85339	-3.13519	0.00171743	0.00652287	Nucleotide-binding alpha-beta plait domain superfamily, RNA recognition motif domain, RNA-binding domain superfamily	GO:0003676, GO:0003723
AeUmb.PI554389.v2.5U.G0532000	8.67674	-3.37282	1.31942	-2.5563	0.0105793	0.0312638
AeUmb.PI554389.v2.5U.G0532300	4838.39	-0.483739	0.141614	-3.41589	0.00063573	0.00272887
AeUmb.PI554389.v2.5U.G0532800	279.479	0.543451	0.219093	2.48045	0.0131215	0.0374571	ESCRT-2 complex, Snf8, Snf8/Vps36 family, Winged helix DNA-binding domain superfamily, Winged helix-like DNA-binding domain superfamily	GO:0000814, GO:0071985
AeUmb.PI554389.v2.5U.G0532900	86.0912	-0.65355	0.268879	-2.43065	0.0150717	0.0420621
AeUmb.PI554389.v2.5U.G0533500	136.506	-2.1694	0.380934	-5.69496	1.23401e-08	1.36971e-07
AeUmb.PI554389.v2.5U.G0533700	15.8292	1.83818	0.699996	2.62599	0.0086398	0.0263043
AeUmb.PI554389.v2.5U.G0534300	430.479	4.13359	0.38118	10.8442	2.12471e-27	2.69624e-25	GPI mannosyltransferase	GO:0016757
AeUmb.PI554389.v2.5U.G0534400	4400.89	-0.403925	0.149746	-2.69741	0.00698819	0.0219623	B-box-type zinc finger	GO:0008270
AeUmb.PI554389.v2.5U.G0535500	49.6767	-1.44944	0.413989	-3.50116	0.000463242	0.00205506
AeUmb.PI554389.v2.5U.G0535700	24.4208	-7.18202	1.53423	-4.6812	2.85199e-06	2.08612e-05
AeUmb.PI554389.v2.5U.G0535800	628.338	-0.582378	0.14522	-4.01031	6.06403e-05	0.00033488	G-protein beta WD-40 repeat, NTD2 domain, NTD2 domain superfamily, TFIID subunit TAF5, WD40 repeat, WD40-repeat-containing domain superfamily, WD40/YVTN repeat-like-containing domain superfamily, conserved site	GO:0005515
AeUmb.PI554389.v2.5U.G0535900	617.042	-1.12019	0.308811	-3.62742	0.000286268	0.0013465	Cytochrome P450, Cytochrome P450 superfamily, E-class, conserved site, group I	GO:0004497, GO:0005506, GO:0016705, GO:0020037
AeUmb.PI554389.v2.5U.G0536200	721.731	12.006	1.19547	10.043	9.8665e-24	8.58755e-22	UDP-glucuronosyl/UDP-glucosyltransferase, UDP-glycosyltransferase family, conserved site	GO:0008194
AeUmb.PI554389.v2.5U.G0536300	490.574	-0.544681	0.148085	-3.67816	0.000234922	0.00113196	DPM1-like, Glycosyltransferase 2-like, Nucleotide-diphospho-sugar transferases	GO:0004582
AeUmb.PI554389.v2.5U.G0539300	1088.51	1.6388	0.322674	5.0788	3.79823e-07	3.27942e-06
AeUmb.PI554389.v2.5U.G0539400	669.402	1.64729	0.198914	8.28143	1.217e-16	4.46065e-15	UDP-glucuronosyl/UDP-glucosyltransferase, UDP-glycosyltransferase family, conserved site	GO:0008194
AeUmb.PI554389.v2.5U.G0539700	2273.83	-0.689751	0.176748	-3.90246	9.52219e-05	0.000503571	CCT domain, CheY-like superfamily, Signal transduction response regulator, Two-component response regulator ARR-like, receiver domain	GO:0000160, GO:0005515, GO:0009736
AeUmb.PI554389.v2.5U.G0540200	6394.05	-0.558339	0.213974	-2.60937	0.00907079	0.0274381
AeUmb.PI554389.v2.5U.G0541400	3131.36	-0.265203	0.112255	-2.36251	0.0181517	0.0491102	ATPase, At2g17340, Damage-control phosphatase ARMT1-like, Pantothenate kinase, Type II pantothenate kinase, acetyl-CoA regulated, metal-binding domain, metal-binding domain superfamily, nucleotide binding domain, three-helix bundle domain, two-domain type	GO:0004594, GO:0005524, GO:0015937
AeUmb.PI554389.v2.5U.G0542200	47.7002	5.4001	1.13537	4.75624	1.9723e-06	1.4903e-05	ApaH type, Calcineurin-like phosphoesterase domain, Metallo-dependent phosphatase-like, Probable inactive purple acid phosphatase 14/16/28/29	GO:0016787
AeUmb.PI554389.v2.5U.G0542400	256.804	0.786649	0.243998	3.224	0.00126413	0.00498879	ApaH type, Calcineurin-like phosphoesterase domain, Metallo-dependent phosphatase-like, Probable inactive purple acid phosphatase 14/16/28/29	GO:0016787
AeUmb.PI554389.v2.5U.G0542700	87.6178	1.00216	0.28699	3.49197	0.00047947	0.00211834	ApaH type, Calcineurin-like phosphoesterase domain, Metallo-dependent phosphatase-like, Probable inactive purple acid phosphatase 14/16/28/29	GO:0016787
AeUmb.PI554389.v2.5U.G0543800	6.69005	6.30901	1.45739	4.32897	1.49805e-05	9.48315e-05	Chromo-like domain superfamily, Ribonuclease H superfamily, Ribonuclease H-like superfamily	GO:0003676
AeUmb.PI554389.v2.5U.G0543900	164.114	-2.923	0.301953	-9.68031	3.65602e-22	2.62278e-20
AeUmb.PI554389.v2.5U.G0544000	66.5843	-3.13111	0.51011	-6.13811	8.35075e-10	1.12193e-08
AeUmb.PI554389.v2.5U.G0544700	42.4258	1.72258	0.479188	3.59479	0.000324647	0.00150176
AeUmb.PI554389.v2.5U.G0545100	16.9798	-9.31413	1.76337	-5.28199	1.27787e-07	1.19598e-06	C-terminal, N-terminal, O-acyltransferase, O-acyltransferase WSD1, O-acyltransferase WSD1-like, WSD1-like	GO:0004144, GO:0008374, GO:0045017
AeUmb.PI554389.v2.5U.G0545400	61.876	5.80899	0.872237	6.65987	2.74068e-11	4.6165e-10	C-terminal, Chloramphenicol acetyltransferase-like domain superfamily, N-terminal, O-acyltransferase, O-acyltransferase WSD1, O-acyltransferase WSD1-like, WSD1-like	GO:0004144, GO:0008374, GO:0045017
AeUmb.PI554389.v2.5U.G0545900	36.8234	3.23605	0.90292	3.58398	0.000338397	0.00155726	C-terminal, Chloramphenicol acetyltransferase-like domain superfamily, N-terminal, O-acyltransferase, O-acyltransferase WSD1, O-acyltransferase WSD1-like, WSD1-like	GO:0004144, GO:0008374, GO:0045017
AeUmb.PI554389.v2.5U.G0546200	1012.83	0.885112	0.355768	2.48789	0.0128504	0.0367945	ATP binding site, Protein kinase, Protein kinase domain, Protein kinase-like domain superfamily, Serine-threonine/tyrosine-protein kinase, Serine/threonine-protein kinase, active site, catalytic domain	GO:0004672, GO:0005524, GO:0006468
AeUmb.PI554389.v2.5U.G0547400	186.878	-2.02564	0.307714	-6.58289	4.61392e-11	7.52834e-10
AeUmb.PI554389.v2.5U.G0548300	31.8812	7.8769	1.24772	6.31305	2.73593e-10	3.97644e-09
AeUmb.PI554389.v2.5U.G0548400	395.752	-0.707286	0.188462	-3.75293	0.000174776	0.000869387	Seipin family	GO:0019915
AeUmb.PI554389.v2.5U.G0550300	14700.8	0.306244	0.120354	2.54452	0.0109427	0.0321584	Aldolase-type TIM barrel, Triosephosphate isomerase, Triosephosphate isomerase superfamily, active site, bacterial/eukaryotic	GO:0004807, GO:0006096
AeUmb.PI554389.v2.5U.G0550800	222.965	-1.63269	0.244053	-6.68988	2.23354e-11	3.81546e-10	Proteasome assembly chaperone 4	GO:0043248
AeUmb.PI554389.v2.5U.G0551600	71.7081	9.92708	1.25251	7.92573	2.2681e-15	6.92631e-14	Glycosyltransferase subfamily 4-like, N-terminal domain, UDP-glucuronosyl/UDP-glucosyltransferase	GO:0008194
AeUmb.PI554389.v2.5U.G0552200	318.953	0.525413	0.210043	2.50146	0.0123682	0.0356401	XAP5 protein	GO:0005634
AeUmb.PI554389.v2.5U.G0552600	317.597	5.06653	0.329304	15.3856	2.04522e-53	1.14389e-50	Multi antimicrobial extrusion protein, Multidrug and toxic compound extrusion family, eukaryotic	GO:0015297, GO:0016020, GO:0042910, GO:0055085, GO:1990961
AeUmb.PI554389.v2.5U.G0552900	73.3359	9.16228	1.20552	7.60027	2.95524e-14	7.61555e-13	F-box associated interaction domain, F-box domain, F-box-like domain superfamily	GO:0005515
AeUmb.PI554389.v2.5U.G0553200	14.1941	-7.49569	1.59497	-4.69959	2.60687e-06	1.92125e-05	F-box associated interaction domain, F-box domain, F-box-like domain superfamily, Galactose oxidase/kelch, Kelch-type beta propeller, beta-propeller	GO:0005515
AeUmb.PI554389.v2.5U.G0553300	87.959	-0.77569	0.275394	-2.81665	0.0048527	0.0161216	F-box associated interaction domain, F-box domain, F-box-like domain superfamily	GO:0005515
AeUmb.PI554389.v2.5U.G0553400	40.2326	8.24307	1.22462	6.7311	1.68386e-11	2.92609e-10	F-box associated interaction domain, F-box domain, F-box-like domain superfamily	GO:0005515
AeUmb.PI554389.v2.5U.G0553500	31.6277	1.95867	0.6629	2.95469	0.0031298	0.0110202	F-box associated interaction domain, F-box domain, F-box-like domain superfamily	GO:0005515
AeUmb.PI554389.v2.5U.G0557300	69.4007	-2.24137	0.439549	-5.09925	3.41002e-07	2.97314e-06
AeUmb.PI554389.v2.5U.G0557700	126.582	1.75504	0.553826	3.16894	0.00152997	0.00589825	Cytochrome P450, Cytochrome P450 superfamily, E-class, conserved site, group I	GO:0004497, GO:0005506, GO:0016705, GO:0020037
AeUmb.PI554389.v2.5U.G0557900	502.482	2.17321	0.299217	7.26297	3.7869e-13	8.29984e-12	Cytochrome P450, Cytochrome P450 superfamily, E-class, conserved site, group I	GO:0004497, GO:0005506, GO:0016705, GO:0020037
AeUmb.PI554389.v2.5U.G0558000	220.729	0.584156	0.192705	3.03135	0.00243466	0.00885069	Cyclophilin-like domain superfamily, Cyclophilin-type peptidyl-prolyl cis-trans isomerase, Cyclophilin-type peptidyl-prolyl cis-trans isomerase domain, conserved site	GO:0000413, GO:0003755, GO:0006457
AeUmb.PI554389.v2.5U.G0558300	29.0513	3.94231	0.702836	5.60914	2.03337e-08	2.17003e-07
AeUmb.PI554389.v2.5U.G0558400	10.5944	4.71617	1.15257	4.09188	4.27881e-05	0.000244891
AeUmb.PI554389.v2.5U.G0560500	41.6639	1.67908	0.505673	3.3205	0.000898572	0.00369385	C2 domain, C2 domain superfamily, Synaptotagmin, plant	GO:0008289
AeUmb.PI554389.v2.5U.G0560700	3068.84	-0.36151	0.109992	-3.28668	0.00101375	0.00410861	C2 domain, C2 domain superfamily, SMP domain, Synaptotagmin, Synaptotagmin-like mitochondrial-lipid-binding domain, plant	GO:0008289
AeUmb.PI554389.v2.5U.G0561400	84.8314	1.07054	0.378194	2.83067	0.00464505	0.0154982	Chitobiosyldiphosphodolichol beta-mannosyltransferase ALG1-like, Glycosyltransferase subfamily 4-like, N-terminal domain	GO:0000030
AeUmb.PI554389.v2.5U.G0561500	251.462	1.48408	0.273239	5.43146	5.58962e-08	5.56787e-07	Beta-galactosidase, D-galactoside/L-rhamnose binding SUEL lectin domain, D-galactoside/L-rhamnose binding SUEL lectin domain superfamily, Galactose-binding-like domain superfamily, Glycoside hydrolase, Glycoside hydrolase 35, Glycoside hydrolase superfamily, beta-sandwich domain, catalytic domain, family 35	GO:0004553, GO:0005975, GO:0030246
AeUmb.PI554389.v2.5U.G0562200	117.776	-1.22599	0.385203	-3.18272	0.00145897	0.00565064	POZ domain, S-phase kinase-associated protein 1, S-phase kinase-associated protein 1-like, SKP1 component, SKP1-like, SKP1/BTB/POZ domain superfamily, dimerisation, dimerisation domain superfamily	GO:0006511
AeUmb.PI554389.v2.5U.G0563000	21.2152	1.86254	0.650295	2.86415	0.00418128	0.0141541	G-protein beta WD-40 repeat, Histone-binding protein RBBP4, N-terminal, WD40 repeat, WD40-repeat-containing domain superfamily, WD40/YVTN repeat-like-containing domain superfamily, conserved site	GO:0005515
AeUmb.PI554389.v2.5U.G0563100	382.257	1.19379	0.302324	3.94872	7.85703e-05	0.000422464	Basic-leucine zipper domain, Basic-leucine zipper domain superfamily, Plant bZIP transcription factors	GO:0003700, GO:0006355, GO:0045893
AeUmb.PI554389.v2.5U.G0563300	6652.73	-3.71805	0.334735	-11.1075	1.15391e-28	1.62095e-26	Aquaporin transporter, Aquaporin-like, Major intrinsic protein, conserved site	GO:0015267, GO:0016020, GO:0055085
AeUmb.PI554389.v2.5U.G0563800	6.29	4.78133	1.5742	3.0373	0.0023871	0.0086998
AeUmb.PI554389.v2.5U.G0564600	7.72203	-5.18149	1.6911	-3.06397	0.00218417	0.00804766
AeUmb.PI554389.v2.5U.G0565600	7.29755	-6.78955	1.94866	-3.48423	0.000493564	0.00217329	Cytochrome P450, Cytochrome P450 superfamily, E-class, conserved site, group I	GO:0004497, GO:0005506, GO:0016705, GO:0020037
AeUmb.PI554389.v2.5U.G0565800	2087.24	0.629856	0.127012	4.95903	7.08476e-07	5.81767e-06
AeUmb.PI554389.v2.5U.G0566300	20.8448	-2.62289	1.04322	-2.51422	0.0119297	0.0345977	ATP binding site, Leucine-rich repeat, Leucine-rich repeat domain superfamily, Leucine-rich repeat-containing N-terminal, Protein kinase, Protein kinase domain, Protein kinase-like domain superfamily, Tyrosine-protein kinase, active site, plant-type, typical subtype	GO:0004672, GO:0005515, GO:0005524, GO:0006468
AeUmb.PI554389.v2.5U.G0567700	6.08137	-6.12281	1.86646	-3.28043	0.00103648	0.00419061
AeUmb.PI554389.v2.5U.G0568100	332.327	-0.775029	0.287405	-2.69664	0.00700424	0.0220058
AeUmb.PI554389.v2.5U.G0568200	978.333	-0.620639	0.194984	-3.18303	0.00145742	0.00564536	Tetratricopeptide repeat, Tetratricopeptide repeat 1, Tetratricopeptide-like helical domain superfamily	GO:0005515
AeUmb.PI554389.v2.5U.G0568500	256.198	1.3841	0.320814	4.31433	1.60087e-05	0.000100749
AeUmb.PI554389.v2.5U.G0570100	35.1843	1.94052	0.700981	2.7683	0.00563495	0.0182721
AeUmb.PI554389.v2.5U.G0570900	29.6807	8.13741	1.23785	6.57381	4.90429e-11	7.95485e-10
AeUmb.PI554389.v2.5U.G0571300	1504.51	8.79555	0.682259	12.8918	5.00497e-38	1.31444e-35	ATP binding site, Gnk2-homologous domain, Gnk2-homologous domain superfamily, Protein kinase, Protein kinase domain, Protein kinase-like domain superfamily, Serine/threonine-protein kinase, active site	GO:0004672, GO:0005524, GO:0006468
AeUmb.PI554389.v2.5U.G0571700	66.6234	7.87019	1.3214	5.95596	2.58554e-09	3.20428e-08	ATP binding site, Gnk2-homologous domain, Gnk2-homologous domain superfamily, Protein kinase, Protein kinase domain, Protein kinase-like domain superfamily, Serine/threonine-protein kinase, active site	GO:0004672, GO:0005524, GO:0006468
AeUmb.PI554389.v2.5U.G0572200	2546.07	13.2633	1.24256	10.6742	1.34422e-26	1.59836e-24	Glycoside hydrolase family 17, Glycoside hydrolase superfamily, X8 domain, plant	GO:0004553, GO:0005975
AeUmb.PI554389.v2.5U.G0572400	1838.45	11.4406	1.0834	10.5599	4.57019e-26	5.18906e-24
AeUmb.PI554389.v2.5U.G0572500	338.847	10.6777	1.19812	8.91205	5.00961e-19	2.49259e-17	ATP binding site, Gnk2-homologous domain, Gnk2-homologous domain superfamily, Protein kinase, Protein kinase domain, Protein kinase-like domain superfamily, Serine/threonine-protein kinase, active site	GO:0004672, GO:0005524, GO:0006468
AeUmb.PI554389.v2.5U.G0574600	39.1306	1.63014	0.456191	3.57338	0.000352403	0.00161458	NAC domain, NAC domain superfamily	GO:0003677, GO:0006355
AeUmb.PI554389.v2.5U.G0576000	295.516	0.519595	0.212054	2.45029	0.0142739	0.0401959	ATP-binding domain, C-terminal, Helicase, Helicase superfamily 1/2, N-terminal, N-terminal domain superfamily, P-loop containing nucleoside triphosphate hydrolase, SNF2, SNF2 domain-containing protein CLSY/DRD1, SNF2-like	GO:0005524, GO:0080188, GO:0140658
AeUmb.PI554389.v2.5U.G0576100	451.258	1.01199	0.341444	2.96385	0.00303819	0.0107434	UDP-glucuronosyl/UDP-glucosyltransferase, UDP-glycosyltransferase family, conserved site	GO:0008194
AeUmb.PI554389.v2.5U.G0576200	22.5304	-4.01535	0.843787	-4.75873	1.94817e-06	1.47502e-05	Apoptotic protease-activating factors, Disease resistance protein, Leucine-rich repeat domain superfamily, N-terminal, NB-ARC, P-loop containing nucleoside triphosphate hydrolase, Rx, Virus X resistance protein-like, Winged helix-like DNA-binding domain superfamily, coiled-coil domain, helical domain, plants	GO:0006952, GO:0043531
AeUmb.PI554389.v2.5U.G0576400	10.893	2.89801	1.08129	2.68015	0.00735889	0.0229529
AeUmb.PI554389.v2.5U.G0576600	188.564	-5.4438	0.580637	-9.37557	6.88041e-21	4.27576e-19
AeUmb.PI554389.v2.5U.G0577100	30.3135	7.75836	1.23264	6.2941	3.09195e-10	4.4681e-09
AeUmb.PI554389.v2.5U.G0578000	366.044	-11.5774	1.45897	-7.93535	2.09906e-15	6.46236e-14
AeUmb.PI554389.v2.5U.G0578300	35.0926	1.55734	0.588202	2.64763	0.00810591	0.0249429	F-box-like domain superfamily	GO:0005515
AeUmb.PI554389.v2.5U.G0579000	9.65372	-2.83055	1.07481	-2.63354	0.00845004	0.0258256	Small auxin-up RNA	GO:0009733
AeUmb.PI554389.v2.5U.G0579100	23.9529	-2.3023	0.787124	-2.92495	0.00344513	0.0119735	Small auxin-up RNA	GO:0009733
AeUmb.PI554389.v2.5U.G0579200	19.3051	-1.95006	0.725073	-2.68946	0.00715677	0.0224197	Small auxin-up RNA	GO:0009733
AeUmb.PI554389.v2.5U.G0579300	312.684	0.521791	0.210382	2.4802	0.0131308	0.0374801	Chaperone tailless complex polypeptide 1 (TCP-1), Chaperonin Cpn60/GroEL/TCP-1 family, Chaperonin TCP-1, GroEL-like apical domain superfamily, GroEL-like equatorial domain superfamily, T-complex protein 1, TCP-1-like chaperonin intermediate domain superfamily, beta subunit, conserved site	GO:0005524, GO:0005829, GO:0005832, GO:0006457, GO:0016887, GO:0051082, GO:0140662
AeUmb.PI554389.v2.5U.G0579500	166.617	-1.41686	0.373703	-3.79141	0.000149794	0.000757238	Aquaporin transporter, Aquaporin-like, Major intrinsic protein, conserved site	GO:0015267, GO:0016020, GO:0055085
AeUmb.PI554389.v2.5U.G0580000	132.023	2.77537	0.42101	6.59216	4.33462e-11	7.10154e-10	Small auxin-up RNA	GO:0009733
AeUmb.PI554389.v2.5U.G0580100	7.82772	-6.65849	1.81264	-3.67337	0.000239375	0.00115048
AeUmb.PI554389.v2.5U.G0581200	14.5053	6.81907	1.4252	4.78462	1.71309e-06	1.30785e-05	Leucine-rich repeat, Leucine-rich repeat domain superfamily, Leucine-rich repeat-containing N-terminal, plant-type	GO:0005515
AeUmb.PI554389.v2.5U.G0581400	3.60143	4.35537	1.51566	2.87358	0.00405842	0.013801
AeUmb.PI554389.v2.5U.G0581500	55.1697	8.61515	1.24151	6.93923	3.94229e-12	7.531e-11
AeUmb.PI554389.v2.5U.G0582200	5.81109	-6.12201	2.06102	-2.97038	0.00297435	0.0105498
AeUmb.PI554389.v2.5U.G0582500	152.561	-2.81427	0.689932	-4.07905	4.52204e-05	0.000257348	EF-Hand 1, EF-hand domain, EF-hand domain pair, calcium-binding site	GO:0005509
AeUmb.PI554389.v2.5U.G0583000	89.4005	-1.89219	0.467911	-4.04392	5.2566e-05	0.000294873	Small auxin-up RNA	GO:0009733
AeUmb.PI554389.v2.5U.G0587800	26.779	2.53017	0.797191	3.17386	0.00150427	0.00580905	Small auxin-up RNA	GO:0009733
AeUmb.PI554389.v2.5U.G0588400	5.11273	-6.67971	2.39944	-2.78386	0.00537155	0.0175575	Small auxin-up RNA	GO:0009733
AeUmb.PI554389.v2.5U.G0589800	66.6446	2.22194	0.530295	4.19	2.78954e-05	0.000166732	Vacuolar protein sorting-associated protein IST1-like, Vacuolar protein sorting-associated protein Ist1	GO:0015031
AeUmb.PI554389.v2.5U.G0590200	16.5728	5.00195	1.3181	3.7948	0.00014776	0.000748388	E3 ubiquitin-protein ligase ZNF598/Hel2, RING finger, RING-type, ZN598/Hel2, Zinc finger, Zinc finger C2H2-type	GO:0061630, GO:0072344
AeUmb.PI554389.v2.5U.G0591200	702.984	0.981351	0.357559	2.74458	0.00605881	0.0194585	CENP-T/Histone H4, Histone H4, Histone-fold, conserved site, histone fold	GO:0000786, GO:0003677, GO:0030527, GO:0046982
AeUmb.PI554389.v2.5U.G0592600	871.311	4.80342	0.464317	10.3451	4.40402e-25	4.50882e-23
AeUmb.PI554389.v2.5U.G0592700	31.4543	7.31066	1.30372	5.60756	2.05203e-08	2.18685e-07
AeUmb.PI554389.v2.5U.G0595000	643.686	-1.4667	0.401205	-3.65574	0.000256438	0.00122256	Multi antimicrobial extrusion protein, Multidrug and toxic compound extrusion family, eukaryotic	GO:0015297, GO:0016020, GO:0042910, GO:0055085, GO:1990961
AeUmb.PI554389.v2.5U.G0596100	61.1357	-1.31539	0.513475	-2.56175	0.0104146	0.0308556	Large ribosomal subunit protein uL18	GO:0003735, GO:0005840, GO:0006412
AeUmb.PI554389.v2.5U.G0598400	393.082	-2.01686	0.214834	-9.38796	6.11727e-21	3.81722e-19
AeUmb.PI554389.v2.5U.G0600000	24.5768	7.80495	1.2671	6.15972	7.28756e-10	9.85223e-09	Ankyrin repeat, Ankyrin repeat-containing domain superfamily, PGG domain	GO:0005515
AeUmb.PI554389.v2.5U.G0600200	478.873	-0.614482	0.166826	-3.68338	0.000230163	0.00111151	Bromodomain, Bromodomain-like superfamily, conserved site	GO:0005515
AeUmb.PI554389.v2.5U.G0601600	85.8207	10.4591	1.20715	8.66432	4.54199e-18	1.98861e-16	C-terminal, Chloramphenicol acetyltransferase-like domain superfamily, N-terminal, O-acyltransferase, O-acyltransferase WSD1, O-acyltransferase WSD1-like, WSD1-like	GO:0004144, GO:0008374, GO:0045017
AeUmb.PI554389.v2.5U.G0602100	127.922	7.88559	1.03496	7.6192	2.55251e-14	6.66877e-13
AeUmb.PI554389.v2.5U.G0602400	230.594	-0.8295	0.282349	-2.93786	0.0033049	0.0115499	C-terminal, C-terminal domain, C-terminal domain superfamily, DNA mismatch repair protein, DNA mismatch repair protein MutL/Mlh/PMS, DNA mismatch repair protein MutL/Mlh/Pms-like, Histidine kinase/HSP90-like ATPase superfamily, MutL, Ribosomal protein uS5 domain 2-type superfamily, S5 domain 2-like, Small ribosomal subunit protein uS5 domain 2-type fold, dimerisation, dimerisation subdomain, regu…	GO:0005524, GO:0006298, GO:0016887, GO:0030983, GO:0032300, GO:0140664
AeUmb.PI554389.v2.5U.G0603800	71.1315	3.75702	0.637668	5.89181	3.81989e-09	4.60184e-08	Pentatricopeptide repeat, Tetratricopeptide-like helical domain superfamily	GO:0005515
AeUmb.PI554389.v2.5U.G0603900	117.983	5.1295	0.632027	8.11596	4.81966e-16	1.62459e-14	Multi antimicrobial extrusion protein, Multidrug and toxic compound extrusion family, eukaryotic	GO:0015297, GO:0016020, GO:0042910, GO:0055085, GO:1990961
AeUmb.PI554389.v2.5U.G0606600	2358.23	1.55096	0.467353	3.31861	0.000904657	0.00371532	Membrane transport protein, Protein PIN-LIKES 1/3/4/5/7	GO:0016020, GO:0055085, GO:0080162
AeUmb.PI554389.v2.5U.G0606700	128.443	1.50998	0.603012	2.50406	0.0122778	0.0354201
AeUmb.PI554389.v2.5U.G0606800	40.0427	8.52764	1.23099	6.92745	4.28488e-12	8.14937e-11
AeUmb.PI554389.v2.5U.G0607000	38.0525	2.68201	0.718463	3.73298	0.000189226	0.000933521
AeUmb.PI554389.v2.5U.G0607700	26.6909	4.45038	0.756633	5.88182	4.05788e-09	4.86593e-08
AeUmb.PI554389.v2.5U.G0607800	317.409	-0.6504	0.266517	-2.44037	0.0146722	0.0411372
AeUmb.PI554389.v2.5U.G0608600	10.4533	-2.98571	1.09682	-2.72216	0.00648576	0.0206279
AeUmb.PI554389.v2.5U.G0609000	10.5432	-6.77307	1.98623	-3.41001	0.000649597	0.00278009	F-box-like domain superfamily, FBD domain, Leucine-rich repeat 2, Leucine-rich repeat domain superfamily	GO:0005515
AeUmb.PI554389.v2.5U.G0609500	68.4938	8.96339	1.20554	7.43516	1.04438e-13	2.49741e-12	F-box-like domain superfamily	GO:0005515
AeUmb.PI554389.v2.5U.G0609600	7.92607	5.82437	1.42899	4.07586	4.58446e-05	0.000260655
AeUmb.PI554389.v2.5U.G0609800	85.71	2.16297	0.411504	5.25627	1.47009e-07	1.36572e-06	Large ribosomal subunit protein bL9/RNase H1, N-terminal, N-terminal domain superfamily, Ribonuclease H domain, Ribonuclease H superfamily, Ribonuclease H-like superfamily, Ribonuclease H1	GO:0003676, GO:0004523
AeUmb.PI554389.v2.5U.G0610100	11.1016	4.76092	1.53207	3.10751	0.00188673	0.00706723
AeUmb.PI554389.v2.5U.G0610200	12.3982	2.78975	0.836007	3.33699	0.000846911	0.00351062
AeUmb.PI554389.v2.5U.G0610400	328.83	4.75076	0.696394	6.82195	8.98126e-12	1.63602e-10	Alpha/Beta hydrolase fold, Cutinase	GO:0050525, GO:0052689
AeUmb.PI554389.v2.5U.G0610800	525.262	2.78627	0.268092	10.393	2.66842e-25	2.78864e-23	Cytochrome P450, Cytochrome P450 superfamily, E-class, conserved site, group I	GO:0004497, GO:0005506, GO:0016705, GO:0020037
AeUmb.PI554389.v2.5U.G0611100	408.929	-0.73881	0.184234	-4.01018	6.06725e-05	0.000334895
AeUmb.PI554389.v2.5U.G0612500	3273.41	-0.65343	0.129238	-5.05601	4.28128e-07	3.65987e-06	C-terminal-processing peptidase S41A, ClpP/crotonase-like domain superfamily, PDZ domain, PDZ domain 6, PDZ superfamily, Peptidase M50, Tail specific protease	GO:0005515, GO:0006508, GO:0008236
AeUmb.PI554389.v2.5U.G0612600	36.8395	5.94063	1.50483	3.94771	7.89031e-05	0.000423952
AeUmb.PI554389.v2.5U.G0612900	182.437	0.768465	0.27825	2.76178	0.00574875	0.0185734
AeUmb.PI554389.v2.5U.G0613200	3297.71	-0.375083	0.155148	-2.41758	0.0156241	0.0433472	MFS transporter superfamily, Major facilitator superfamily, Major facilitator superfamily domain, Solute carrier family 17 member 9-like	GO:0022857, GO:0055085
AeUmb.PI554389.v2.5U.G0613800	152.99	-1.85414	0.53552	-3.46232	0.000535541	0.00233431	Extended PHD (ePHD) domain, FYVE/PHD-type, PHD-finger, PHD-type, Post-SET domain, RING/FYVE/PHD-type, SET domain, SET domain superfamily, Tify domain binding domain, Zinc finger	GO:0005515
AeUmb.PI554389.v2.5U.G0614000	28.7158	7.51575	1.25951	5.9672	2.4136e-09	3.00476e-08
AeUmb.PI554389.v2.5U.G0615800	389.184	0.873512	0.233445	3.74184	0.00018268	0.000905068
AeUmb.PI554389.v2.5U.G0616100	241.933	-1.14279	0.217289	-5.25932	1.44593e-07	1.34452e-06
AeUmb.PI554389.v2.5U.G0616600	231.666	1.19249	0.266472	4.47512	7.63667e-06	5.12539e-05	BTB/Kelch-associated, BTB/POZ domain, BTB/POZ domain-containing protein POB1-like, SKP1/BTB/POZ domain superfamily	GO:0005515
AeUmb.PI554389.v2.5U.G0617700	9.46114	3.24498	1.15191	2.81705	0.00484672	0.0161035	Cupredoxin, Phytocyanin domain, Phytocyanin-like	GO:0009055
AeUmb.PI554389.v2.5U.G0617800	1117.19	-0.84383	0.181561	-4.64765	3.3574e-06	2.42179e-05	PPM-type phosphatase, PPM-type phosphatase-like domain, PPM-type phosphatase-like domain superfamily, Protein phosphatase 2C family, divalent cation binding	GO:0004722, GO:0006470, GO:0043169
AeUmb.PI554389.v2.5U.G0618200	999.277	-0.653956	0.165342	-3.95518	7.64782e-05	0.000412316	Proteolipid membrane potential modulator	GO:0016020
AeUmb.PI554389.v2.5U.G0619500	2609.25	0.620467	0.187954	3.30117	0.000962827	0.00392645	FAD-binding, FAD-binding domain, Ferredoxin-NADP reductase (FNR), Flavodoxin-like, Flavodoxin/nitric oxide synthase, Flavoprotein pyridine nucleotide cytochrome reductase, Flavoprotein-like superfamily, NADPH-cytochrome P450 reductase, NADPH-cytochrome p450 reductase, Oxidoreductase FAD/NAD(P)-binding, Riboflavin synthase-like beta-barrel, Sulfite reductase [NADPH] flavoprotein alpha-component-li…	GO:0003958, GO:0010181, GO:0016491
AeUmb.PI554389.v2.5U.G0620600	6.51861	6.55963	1.56848	4.18217	2.88742e-05	0.000171868
AeUmb.PI554389.v2.5U.G0621000	960.738	-0.881909	0.22126	-3.98586	6.72373e-05	0.000367415
AeUmb.PI554389.v2.5U.G0621500	12.0335	7.91018	1.93101	4.09639	4.19635e-05	0.000240627
AeUmb.PI554389.v2.5U.G0622200	148.667	-1.85492	0.385553	-4.81106	1.50131e-06	1.15729e-05	Nucleotide-binding alpha-beta plait domain superfamily, RNA recognition motif domain, RNA-binding domain superfamily	GO:0003676, GO:0003723
AeUmb.PI554389.v2.5U.G0622600	810.027	0.348378	0.140312	2.48287	0.0130328	0.037239	MFS transporter superfamily, Major facilitator, Major facilitator superfamily, Major facilitator superfamily domain, Sugar transporter, conserved site, sugar transporter-like	GO:0016020, GO:0022857, GO:0055085
AeUmb.PI554389.v2.5U.G0623300	38.4722	5.07219	1.08067	4.69356	2.68492e-06	1.97417e-05	B3 DNA binding domain, B3 domain-containing protein REM16-like, DNA-binding pseudobarrel domain superfamily	GO:0003677
AeUmb.PI554389.v2.5U.G0625400	206.098	2.60593	0.392024	6.64737	2.98382e-11	4.98712e-10	C-terminal, Molybdenum cofactor sulfurase, Pyruvate kinase-like, insert domain superfamily, middle domain	GO:0003824, GO:0030151, GO:0030170
AeUmb.PI554389.v2.5U.G0625500	127.525	2.92799	0.43842	6.6785	2.41407e-11	4.10758e-10	ATP binding site, EGF-like calcium-binding, EGF-like calcium-binding domain, EGF-like domain, EGF-type aspartate/asparagine hydroxylation site, Growth factor receptor cysteine-rich domain superfamily, Protein kinase, Protein kinase domain, Protein kinase-like domain superfamily, Receptor-like kinase WAK-like, Serine/threonine-protein kinase, Wall-associated receptor kinase, active site, conserved…	GO:0004672, GO:0005509, GO:0005524, GO:0006468, GO:0007166, GO:0030247
AeUmb.PI554389.v2.5U.G0625800	615.33	-0.750514	0.276199	-2.71729	0.00658182	0.0208792	MOM1, P-loop containing nucleoside triphosphate hydrolase	GO:0031507
AeUmb.PI554389.v2.5U.G0626000	12.3568	-7.40082	1.63686	-4.52136	6.14424e-06	4.21363e-05	CCHC-type, MULE transposase domain, MuDR, PMZ-type, SWIM-type, Transposase, Zinc finger, mutator type, plant	GO:0003676, GO:0003677, GO:0004803, GO:0006313, GO:0008270
AeUmb.PI554389.v2.5U.G0628300	21.1784	-6.90029	1.5897	-4.34063	1.42078e-05	9.03565e-05
AeUmb.PI554389.v2.5U.G0628500	1228.46	-0.557418	0.169555	-3.28754	0.00101067	0.00409723	Cathepsin propeptide inhibitor domain (I29), Cysteine peptidase, Papain-like cysteine endopeptidase, Papain-like cysteine peptidase superfamily, Peptidase C1A, asparagine active site, cysteine active site, histidine active site, papain C-terminal	GO:0006508, GO:0008234
AeUmb.PI554389.v2.5U.G0628700	1788.87	0.425444	0.172017	2.47327	0.0133883	0.0380818	Potassium transporter	GO:0015079, GO:0016020, GO:0071805
AeUmb.PI554389.v2.5U.G0630600	23.7445	-7.30769	1.55061	-4.71279	2.44353e-06	1.81236e-05
AeUmb.PI554389.v2.5U.G0630700	29.8248	-7.84606	1.53335	-5.11694	3.10525e-07	2.7255e-06
AeUmb.PI554389.v2.5U.G0631100	69.0324	0.831034	0.331518	2.50675	0.0121845	0.0351814
AeUmb.PI554389.v2.5U.G0632000	7.88867	3.54241	1.41536	2.50283	0.0123206	0.0355369
AeUmb.PI554389.v2.5U.G0632500	13.7367	-3.08613	0.882649	-3.49645	0.000471499	0.0020877	C-terminal catalytic domain, Papain-like cysteine peptidase superfamily, Ulp1 protease family	GO:0006508, GO:0008234
AeUmb.PI554389.v2.5U.G0632700	19.4445	-3.68872	1.036	-3.56055	0.000370079	0.00168457
AeUmb.PI554389.v2.5U.G0633300	628.807	1.16815	0.219682	5.31746	1.05227e-07	1.00318e-06	ATP binding site, G-protein beta WD-40 repeat, Immunoglobulin-like fold, Major sperm protein (MSP) domain, PapD-like superfamily, Protein kinase, Protein kinase domain, Protein kinase-like domain superfamily, Quinoprotein alcohol dehydrogenase-like superfamily, Serine/threonine-protein kinase, WD40 repeat, WD40-repeat-containing domain superfamily, WD40/YVTN repeat-like-containing domain superfam…	GO:0004672, GO:0005515, GO:0005524, GO:0006468
AeUmb.PI554389.v2.5U.G0634800	92.0528	9.49378	1.19589	7.93865	2.04398e-15	6.30565e-14
AeUmb.PI554389.v2.5U.G0637100	1870.24	-0.383407	0.127546	-3.00602	0.00264693	0.00952964	Protein kinase domain, Protein kinase-like domain superfamily, Serine/threonine-protein kinase, active site	GO:0004672, GO:0005524, GO:0006468
AeUmb.PI554389.v2.5U.G0637200	91.5906	-1.16401	0.273935	-4.2492	2.14535e-05	0.000131695	ApaH type, Calcineurin-like phosphoesterase domain, Manganese-dependent ADP-ribose/CDP-alcohol diphosphatase, Metallo-dependent phosphatase-like	GO:0016787
AeUmb.PI554389.v2.5U.G0638500	3949.92	-0.553895	0.172367	-3.21346	0.00131144	0.00515196	Tetratricopeptide-like helical domain superfamily	GO:0005515
AeUmb.PI554389.v2.5U.G0639200	141.492	-2.09181	0.772612	-2.70745	0.00678031	0.0214025
AeUmb.PI554389.v2.5U.G0639700	80.7567	5.26173	0.673803	7.809	5.76447e-15	1.64866e-13	Porin, Porin domain superfamily, eukaryotic type	GO:0005741, GO:0008308, GO:0098656
AeUmb.PI554389.v2.5U.G0639800	248.063	9.59225	1.18884	8.06859	7.11165e-16	2.33463e-14	Eukaryotic porin/Tom40, Porin, Porin domain superfamily, eukaryotic type	GO:0005741, GO:0008308, GO:0055085, GO:0098656
AeUmb.PI554389.v2.5U.G0640000	128.58	-4.04308	0.578841	-6.98479	2.85283e-12	5.58039e-11	Protein DYAD/AMEIOTIC 1	GO:0007131, GO:0051177, GO:0051321
AeUmb.PI554389.v2.5U.G0640700	577.83	0.608478	0.196627	3.09458	0.00197092	0.00734564	High mobility group box domain superfamily, YABBY protein	GO:0007275
AeUmb.PI554389.v2.5U.G0641100	1690.5	-0.626559	0.196038	-3.19611	0.00139294	0.00543112
AeUmb.PI554389.v2.5U.G0643900	145.983	1.05465	0.376169	2.80366	0.00505259	0.0166683
AeUmb.PI554389.v2.5U.G0644800	20.5782	-6.89845	1.61338	-4.27578	1.90467e-05	0.000118048	WD40 repeat, WD40-repeat-containing domain superfamily, WD40/YVTN repeat-like-containing domain superfamily	GO:0005515
AeUmb.PI554389.v2.5U.G0647400	123.666	-3.53737	0.578131	-6.11864	9.43789e-10	1.2557e-08	Amino acid/polyamine transporter I, C-terminal, Cationic amino acid transporter	GO:0016020, GO:0022857, GO:0055085
AeUmb.PI554389.v2.5U.G0647900	233.834	0.801504	0.213593	3.75248	0.000175093	0.000870768	ATP-binding domain, ATP-dependent RNA helicase DEAD-box, C-terminal, DEAD-box type, DEAD/DEAH box helicase domain, Helicase, Helicase superfamily 1/2, P-loop containing nucleoside triphosphate hydrolase, Q motif, RNA helicase, conserved site	GO:0003676, GO:0003724, GO:0005524
AeUmb.PI554389.v2.5U.G0648900	153.595	10.3813	1.20176	8.63842	5.69965e-18	2.47329e-16
AeUmb.PI554389.v2.5U.G0649000	96.9167	-1.47027	0.4815	-3.05351	0.00226181	0.00829723	AAA+ ATPase domain, ATP-binding domain, C-terminal, DNA recombination and repair protein RecA, DNA recombination and repair protein RecA-like, DNA recombination/repair protein RecA, P-loop containing nucleoside triphosphate hydrolase, conserved site, monomer-monomer interface	GO:0003677, GO:0003697, GO:0005524, GO:0006259, GO:0006281, GO:0008094, GO:0016887, GO:0140664
AeUmb.PI554389.v2.5U.G0650600	200.786	1.06928	0.326376	3.27622	0.00105207	0.00424241	F-box domain, F-box-like domain superfamily, Leucine-rich repeat domain superfamily	GO:0005515
AeUmb.PI554389.v2.5U.G0650700	879.489	0.355009	0.143164	2.47974	0.013148	0.0375185	Protein kinase domain, Protein kinase-like domain superfamily, Serine-threonine/tyrosine-protein kinase, Serine/threonine-protein kinase, active site, catalytic domain	GO:0004672, GO:0005524, GO:0006468
AeUmb.PI554389.v2.5U.G0651000	1726.55	-0.586833	0.239453	-2.45072	0.0142569	0.0401592	Protein Networked (NET), actin-binding (NAB) domain	GO:0003779
AeUmb.PI554389.v2.5U.G0651200	659.433	-0.555571	0.220829	-2.51585	0.0118746	0.0344778	Leucine-rich repeat, Leucine-rich repeat domain superfamily, typical subtype	GO:0005515
AeUmb.PI554389.v2.5U.G0651900	174.446	-1.10148	0.255477	-4.31147	1.62174e-05	0.000101914
AeUmb.PI554389.v2.5U.G0652200	3918.07	-0.620908	0.263304	-2.35814	0.0183666	0.0495939	ATP binding site, NAF domain, NAF/FISL domain, Protein kinase, Protein kinase domain, Protein kinase-like domain superfamily, Serine/threonine-protein kinase, active site	GO:0004672, GO:0005524, GO:0006468, GO:0007165
AeUmb.PI554389.v2.5U.G0653700	31.3911	7.87902	1.25713	6.26747	3.66965e-10	5.22787e-09
AeUmb.PI554389.v2.5U.G0654700	333.313	2.4591	0.536674	4.58212	4.60284e-06	3.23592e-05
AeUmb.PI554389.v2.5U.G0656400	27.9964	-5.59809	1.45834	-3.83868	0.000123697	0.000636765	F-box domain, F-box-like domain superfamily, Leucine-rich repeat domain superfamily	GO:0005515
AeUmb.PI554389.v2.5U.G0656500	192.286	-1.14533	0.265284	-4.31739	1.57887e-05	9.95097e-05	DHS-like NAD/FAD-binding domain superfamily, Deoxyhypusine synthase, Deoxyhypusine synthase superfamily	GO:0008612
AeUmb.PI554389.v2.5U.G0657200	48.1543	3.71303	1.04865	3.54076	0.000398976	0.00180225
AeUmb.PI554389.v2.5U.G0657300	1085.99	2.61454	0.412479	6.3386	2.31868e-10	3.40276e-09	Helix-loop-helix DNA-binding domain superfamily, Myc-type, Transcription factor bHLH92/bHLH041-like, basic helix-loop-helix (bHLH) domain	GO:0046983
AeUmb.PI554389.v2.5U.G0657900	40.7457	-8.2666	1.52418	-5.42364	5.83967e-08	5.79973e-07	WRKY domain, WRKY domain superfamily, WRKY transcription factor, Zn-cluster domain, plant	GO:0003700, GO:0006355, GO:0043565
AeUmb.PI554389.v2.5U.G0660100	12.0287	2.267	0.887104	2.55551	0.0106033	0.0313254	Ubiquitin domain, Ubiquitin-like domain, Ubiquitin-like domain superfamily	GO:0005515
AeUmb.PI554389.v2.5U.G0660400	3917.95	0.809849	0.322782	2.50896	0.0121086	0.0350131	ATP-sulfurylase PUA-like domain, PUA-like superfamily, Rossmann-like alpha/beta/alpha sandwich fold, Sulphate adenylyltransferase, Sulphate adenylyltransferase catalytic domain	GO:0000103, GO:0004781
AeUmb.PI554389.v2.5U.G0661200	239.157	0.617253	0.259298	2.38048	0.0172902	0.0471512	A domain superfamily, HAD superfamily, HAD-like superfamily, HMA, Heavy metal-associated domain, Heavy metal-associated domain superfamily, P-type ATPase, cytoplasmic domain N, haloacid dehalogenase domain, phosphorylation site, subfamily IB, transmembrane domain superfamily	GO:0000166, GO:0005215, GO:0005524, GO:0006812, GO:0016020, GO:0016887, GO:0019829, GO:0046872
AeUmb.PI554389.v2.5U.G0661500	348.276	-3.96863	0.565079	-7.02313	2.1695e-12	4.31073e-11	DNA-binding, Heat shock factor (HSF)-type, Heat shock transcription factor family, Winged helix DNA-binding domain superfamily, Winged helix-like DNA-binding domain superfamily	GO:0003700, GO:0006355, GO:0043565
AeUmb.PI554389.v2.5U.G0661600	394.18	1.63503	0.276679	5.90948	3.43183e-09	4.17431e-08	UDP-glucuronosyl/UDP-glucosyltransferase, UDP-glycosyltransferase family, conserved site	GO:0008194
AeUmb.PI554389.v2.5U.G0661800	9.54545	5.81825	1.39921	4.15823	3.20721e-05	0.000189114
AeUmb.PI554389.v2.5U.G0663000	92.5516	1.02437	0.353114	2.90097	0.0037201	0.0127829	C-terminal, C-terminal domain, C-terminal domain 1, DEXQ-box helicase domain, Helicase, Mitochondrial degradasome RNA helicase subunit, P-loop containing nucleoside triphosphate hydrolase, Suv3	GO:0003724, GO:0005524, GO:0016817
AeUmb.PI554389.v2.5U.G0663100	176.111	-0.886271	0.282843	-3.13344	0.00172769	0.00655524	Autophagy-related protein 16, Autophagy-related protein 16 domain, G-protein beta WD-40 repeat, WD40 repeat, WD40-repeat-containing domain superfamily, WD40/YVTN repeat-like-containing domain superfamily, conserved site	GO:0000045, GO:0005515
AeUmb.PI554389.v2.5U.G0663600	615.472	-0.751642	0.288824	-2.60243	0.00925663	0.0278955
AeUmb.PI554389.v2.5U.G0664400	413.032	-0.37011	0.150839	-2.45367	0.0141406	0.0398874
AeUmb.PI554389.v2.5U.G0664500	111.315	4.79532	0.780607	6.14307	8.09433e-10	1.08893e-08
AeUmb.PI554389.v2.5U.G0665800	773.619	-0.611903	0.147566	-4.14664	3.37394e-05	0.000197759
AeUmb.PI554389.v2.5U.G0666700	571.431	0.637727	0.218942	2.91277	0.00358239	0.0123652
AeUmb.PI554389.v2.5U.G0666900	32.4497	-6.96108	1.56893	-4.43683	9.12952e-06	6.04273e-05
AeUmb.PI554389.v2.5U.G0667300	35.9389	-8.69436	1.51846	-5.72577	1.02968e-08	1.15607e-07	UDP-glucuronosyl/UDP-glucosyltransferase, UDP-glycosyltransferase family, conserved site	GO:0008194
AeUmb.PI554389.v2.5U.G0668000	118.247	-8.93047	1.52192	-5.86788	4.41396e-09	5.2505e-08	Glycoside hydrolase, Glycoside hydrolase family 3 C-terminal domain, Glycoside hydrolase family 3 C-terminal domain superfamily, Glycoside hydrolase superfamily, N-terminal, N-terminal domain superfamily, family 3	GO:0004553, GO:0005975
AeUmb.PI554389.v2.5U.G0668400	29.3113	5.61973	1.8232	3.08235	0.00205373	0.00762093	ATP binding site, Leucine-rich repeat, Leucine-rich repeat domain superfamily, Leucine-rich repeat-containing N-terminal, Protein kinase, Protein kinase domain, Protein kinase-like domain superfamily, Serine/threonine-protein kinase, active site, plant-type, typical subtype	GO:0004672, GO:0005515, GO:0005524, GO:0006468
AeUmb.PI554389.v2.5U.G0669300	1015.57	-1.276	0.280314	-4.55204	5.31277e-06	3.69544e-05	Glycoside hydrolase, Glycoside hydrolase family 3 C-terminal domain, Glycoside hydrolase family 3 C-terminal domain superfamily, Glycoside hydrolase superfamily, N-terminal, N-terminal domain superfamily, family 3	GO:0004553, GO:0005975
AeUmb.PI554389.v2.5U.G0670000	82.5267	-9.07015	1.47413	-6.15287	7.60949e-10	1.02462e-08
AeUmb.PI554389.v2.5U.G0670500	929.254	-0.383209	0.105832	-3.62093	0.000293546	0.0013773	ADA2-like, Homeobox-like domain superfamily, Myb domain, SANT domain, SANT/Myb domain, SWIRM domain, Transcriptional adaptor 2, Winged helix-like DNA-binding domain superfamily, ZZ-type, ZZ-type superfamily, Zinc finger, zinc finger	GO:0003713, GO:0005515, GO:0006357, GO:0008270, GO:0035065
AeUmb.PI554389.v2.5U.G0670600	15.1479	2.65243	1.06431	2.49215	0.0126971	0.0364523
AeUmb.PI554389.v2.5U.G0671600	3113.28	0.493463	0.151698	3.25294	0.00114218	0.00456659	HMA, Heavy metal-associated domain, Heavy metal-associated domain superfamily, Protein PYRICULARIA ORYZAE RESISTANCE 21	GO:0046872, GO:1900150
AeUmb.PI554389.v2.5U.G0671900	1930.33	-0.397339	0.162307	-2.44808	0.0143621	0.0404217	EF-Hand 1, EF-hand domain, EF-hand domain pair, Potassium channel domain, Two pore domain potassium channel, calcium-binding site	GO:0005267, GO:0005509, GO:0016020, GO:0071805
AeUmb.PI554389.v2.5U.G0672000	113.982	9.80607	1.21273	8.08592	6.16986e-16	2.03653e-14
AeUmb.PI554389.v2.5U.G0672200	298.718	-0.375597	0.146302	-2.56727	0.0102503	0.0304404
AeUmb.PI554389.v2.5U.G0672600	165.579	-0.620692	0.238979	-2.59727	0.00939683	0.0282503	Cytochrome b5, Cytochrome b5-like heme/steroid binding domain, Cytochrome b5-like heme/steroid binding domain superfamily, heme-binding site	GO:0020037
AeUmb.PI554389.v2.5U.G0673400	140.249	1.71417	0.657947	2.60534	0.00917831	0.027709	Cytochrome P450, Cytochrome P450 superfamily, E-class, conserved site, group I	GO:0004497, GO:0005506, GO:0016705, GO:0020037
AeUmb.PI554389.v2.5U.G0674200	7.30192	4.76585	1.75263	2.71925	0.00654292	0.0207835
AeUmb.PI554389.v2.5U.G0674800	1025.57	0.9216	0.192798	4.78014	1.75172e-06	1.33633e-05	PAT complex subunit Asterix	GO:0005789, GO:0044183, GO:0045048
AeUmb.PI554389.v2.5U.G0674900	353.192	-2.35809	0.346662	-6.80228	1.02976e-11	1.85456e-10	UDP-glucuronosyl/UDP-glucosyltransferase, UDP-glycosyltransferase family, conserved site	GO:0008194
AeUmb.PI554389.v2.5U.G0675200	98.5237	-1.6671	0.509618	-3.27127	0.00107067	0.00430578	UDP-glucuronosyl/UDP-glucosyltransferase, UDP-glycosyltransferase family, conserved site	GO:0008194
AeUmb.PI554389.v2.5U.G0675500	2.36158	-5.03044	1.97297	-2.54967	0.0107824	0.0317817	UDP-glucuronosyl/UDP-glucosyltransferase, UDP-glycosyltransferase family, conserved site	GO:0008194
AeUmb.PI554389.v2.5U.G0675700	26.908	7.4386	1.28405	5.79307	6.9113e-09	7.93972e-08	Prefoldin, subunit 4	GO:0006457, GO:0016272
AeUmb.PI554389.v2.5U.G0675800	24.6659	7.162	1.25999	5.68419	1.31434e-08	1.45034e-07
AeUmb.PI554389.v2.5U.G0675900	69.6454	-8.87077	1.57761	-5.62292	1.8776e-08	2.01303e-07	UDP-glucuronosyl/UDP-glucosyltransferase	GO:0008194
AeUmb.PI554389.v2.5U.G0676100	8433.07	0.806047	0.295364	2.72899	0.00635284	0.0202628	6-phosphogluconate dehydrogenase-like, C-terminal, C-terminal domain superfamily, N-terminal, NAD(P)-binding domain superfamily, UDP-glucose 6-dehydrogenase, UDP-glucose/GDP-mannose dehydrogenase, dimerisation, eukaryotic type	GO:0003979, GO:0016616, GO:0051287
AeUmb.PI554389.v2.5U.G0676700	58.796	1.88462	0.595562	3.16445	0.00155379	0.0059765	Cupredoxin, Phytocyanin domain, Phytocyanin-like	GO:0009055
AeUmb.PI554389.v2.5U.G0677900	31.759	1.29034	0.452126	2.85394	0.00431804	0.0145583
AeUmb.PI554389.v2.5U.G0679800	353.461	-0.472859	0.195413	-2.41979	0.0155296	0.0431407	TIP41-like protein	GO:0043666
AeUmb.PI554389.v2.5U.G0683500	223.032	-0.8338	0.346208	-2.40838	0.0160234	0.0442437
AeUmb.PI554389.v2.5U.G0683700	1542.44	-0.378407	0.153104	-2.47158	0.0134519	0.0382359
AeUmb.PI554389.v2.5U.G0684800	214.607	-10.6083	1.46333	-7.24944	4.18492e-13	9.10611e-12
AeUmb.PI554389.v2.5U.G0684900	6.40686	-6.19947	1.62679	-3.81085	0.000138489	0.000706171
AeUmb.PI554389.v2.5U.G0685100	1129.02	-1.07098	0.291423	-3.67501	0.000237838	0.00114455	Acyl-CoA N-acyltransferase, GNAT domain	GO:0016747
AeUmb.PI554389.v2.5U.G0685200	1075.98	2.48529	0.301617	8.23991	1.72334e-16	6.211e-15	C2H2-type zinc-finger protein AZF1/2/3-like, Zinc finger C2H2 superfamily, Zinc finger C2H2-type	GO:0003700
AeUmb.PI554389.v2.5U.G0685400	904.353	-0.423798	0.152763	-2.77422	0.00553348	0.0179972	ATP binding site, Protein kinase, Protein kinase domain, Protein kinase-like domain superfamily, Serine/threonine-protein kinase, active site	GO:0004672, GO:0005524, GO:0006468
AeUmb.PI554389.v2.5U.G0686100	769.432	-0.37942	0.135213	-2.80609	0.00501468	0.0165668
AeUmb.PI554389.v2.5U.G0686200	2784.74	1.10518	0.191782	5.7627	8.27809e-09	9.43097e-08	LexA/Signal peptidase-like superfamily, Peptidase S26, Peptidase S26A, conserved site, lysine active site, serine active site, signal peptidase I	GO:0004252, GO:0006465, GO:0006508, GO:0008236, GO:0016020
AeUmb.PI554389.v2.5U.G0686300	47.2374	-1.25312	0.527653	-2.37489	0.0175541	0.0477458	Nucleoporin p58/p45/NUP49	GO:0005643, GO:0006913, GO:0008139, GO:0017056
AeUmb.PI554389.v2.5U.G0686400	266.558	-3.15131	0.311899	-10.1036	5.32432e-24	4.80015e-22
AeUmb.PI554389.v2.5U.G0687600	1209.62	1.13102	0.236121	4.79002	1.66768e-06	1.27641e-05	Cytochrome P450, Cytochrome P450 superfamily, E-class, group IV	GO:0004497, GO:0005506, GO:0016705, GO:0020037
AeUmb.PI554389.v2.5U.G0688200	64.3554	1.17965	0.460969	2.55906	0.0104955	0.0310556	DYW domain	GO:0008270
AeUmb.PI554389.v2.5U.G0688700	40.298	1.74035	0.687917	2.52988	0.0114102	0.0333311
AeUmb.PI554389.v2.5U.G0689200	237.973	0.715507	0.186329	3.84001	0.000123028	0.000633848
AeUmb.PI554389.v2.5U.G0689400	557.187	-1.55337	0.173838	-8.93573	4.04495e-19	2.04976e-17	BTB/POZ domain, BTB/POZ domain-containing protein, SKP1/BTB/POZ domain superfamily	GO:0005515
AeUmb.PI554389.v2.5U.G0690300	1754.6	-0.550684	0.20255	-2.71876	0.00655267	0.0208049
AeUmb.PI554389.v2.5U.G0690900	530.224	2.22208	0.331526	6.70258	2.04767e-11	3.50987e-10	ATP binding site, Concanavalin A-like lectin/glucanase domain superfamily, Legume lectin domain, Protein kinase, Protein kinase domain, Protein kinase-like domain superfamily, Serine/threonine-protein kinase, active site	GO:0004672, GO:0005524, GO:0006468, GO:0030246
AeUmb.PI554389.v2.5U.G0692200	2068.48	-0.619352	0.231495	-2.67544	0.00746317	0.0232326
AeUmb.PI554389.v2.5U.G0693100	373.538	1.13585	0.214666	5.29124	1.21488e-07	1.14163e-06	AT hook, DNA-binding, DNA-binding motif, HMG-I/HMG-Y, Linker histone H1/H5, Winged helix DNA-binding domain superfamily, Winged helix-like DNA-binding domain superfamily, conserved site, domain H15	GO:0000786, GO:0003677, GO:0006334, GO:0006355
AeUmb.PI554389.v2.5U.G0693400	2976.33	0.702702	0.227783	3.08496	0.0020358	0.00756182	2-layer sandwich domain, Alpha tubulin, C-terminal, C-terminal domain, GTPase domain, GTPase domain superfamily, Tubulin, Tubulin/FtsZ, Tubulin/FtsZ-like, conserved site	GO:0005200, GO:0005525, GO:0005874, GO:0007017
AeUmb.PI554389.v2.5U.G0693700	2512.2	-0.635224	0.106097	-5.98718	2.13513e-09	2.68241e-08	4Fe-4S ferredoxin, 4Fe-4S ferredoxin-type, NADH-quinone oxidoreductase, chain I, conserved site, iron-sulphur binding, iron-sulphur binding domain	GO:0016020, GO:0016651, GO:0051539
AeUmb.PI554389.v2.5U.G0693900	6315.49	-0.432871	0.137483	-3.14854	0.00164086	0.00626513
AeUmb.PI554389.v2.5U.G0694200	1993.1	-0.844298	0.309778	-2.72549	0.00642053	0.0204614	Methyltransferase Ppm1/Ppm2/Tcmp, S-adenosyl-L-methionine-dependent methyltransferase ML2640-like, S-adenosyl-L-methionine-dependent methyltransferase superfamily	GO:0008168, GO:0008757, GO:0032259
AeUmb.PI554389.v2.5U.G0695900	225.592	5.26087	0.486964	10.8034	3.31661e-27	4.10525e-25
AeUmb.PI554389.v2.5U.G0696000	32.4982	8.09108	1.25203	6.46239	1.03062e-10	1.58972e-09
AeUmb.PI554389.v2.5U.G0696100	31.9228	4.79679	0.680101	7.05306	1.75026e-12	3.5288e-11
AeUmb.PI554389.v2.5U.G0696300	20.1412	7.50926	1.28372	5.8496	4.92767e-09	5.80669e-08
AeUmb.PI554389.v2.5U.G0696900	1505.23	-0.694287	0.177105	-3.9202	8.84741e-05	0.000471103
AeUmb.PI554389.v2.5U.G0697500	115.382	5.18177	0.802567	6.4565	1.07154e-10	1.64612e-09	Cytochrome P450, Cytochrome P450 superfamily, E-class, conserved site, group I	GO:0004497, GO:0005506, GO:0016705, GO:0020037
AeUmb.PI554389.v2.5U.G0697600	61.0933	5.74142	1.03637	5.53996	3.02548e-08	3.14979e-07
AeUmb.PI554389.v2.5U.G0698000	31.5257	-7.499	1.44537	-5.18829	2.12229e-07	1.91108e-06	B3 DNA binding domain, DNA-binding pseudobarrel domain superfamily	GO:0003677
AeUmb.PI554389.v2.5U.G0699200	3.87877	-4.89838	1.87883	-2.60714	0.00913024	0.0275889
AeUmb.PI554389.v2.5U.G0699300	30.9164	-7.38911	1.54105	-4.79486	1.62785e-06	1.24782e-05
AeUmb.PI554389.v2.5U.G0699400	79.6274	1.57715	0.428288	3.68245	0.000231003	0.00111521
AeUmb.PI554389.v2.5U.G0700100	29.3183	3.61303	1.0355	3.48916	0.000484544	0.00213576
AeUmb.PI554389.v2.5U.G0701100	5.51962	6.82551	2.07444	3.29029	0.00100083	0.00406334	Protein JASON	GO:0007142
AeUmb.PI554389.v2.5U.G0702100	371.02	-0.753561	0.171717	-4.38839	1.14194e-05	7.40426e-05	Glycosyl transferase, Nucleotide-diphospho-sugar transferases, family 8	GO:0016757
AeUmb.PI554389.v2.5U.G0702200	93.6449	9.47156	1.21003	7.82757	4.97406e-15	1.42801e-13
AeUmb.PI554389.v2.5U.G0702900	290.458	-0.65445	0.258335	-2.53334	0.0112981	0.0330549	Apoptotic protease-activating factors, Disease resistance protein, Leucine-rich repeat domain superfamily, N-terminal, NB-ARC, P-loop containing nucleoside triphosphate hydrolase, Rx, Winged helix-like DNA-binding domain superfamily, helical domain, plants	GO:0006952, GO:0043531
AeUmb.PI554389.v2.5U.G0703000	354.379	-1.5277	0.292645	-5.22031	1.78625e-07	1.63727e-06	C-terminal domain, CALMODULIN-BINDING PROTEIN60, Calmodulin binding protein, Calmodulin binding protein-like, N-terminal domain, central domain	GO:0005516
AeUmb.PI554389.v2.5U.G0703800	6.38142	4.77174	1.43476	3.32581	0.000881607	0.00363698
AeUmb.PI554389.v2.5U.G0704100	47.5388	-2.93981	0.600365	-4.89671	9.74557e-07	7.79643e-06	C-terminal domain, CALMODULIN-BINDING PROTEIN60, Calmodulin binding protein, Calmodulin binding protein-like, N-terminal domain, central domain	GO:0005516
AeUmb.PI554389.v2.5U.G0704900	8.29366	2.44542	0.913996	2.67553	0.00746109	0.0232285	DNA repair RAD52-like protein	GO:0000724, GO:0003677
AeUmb.PI554389.v2.5U.G0705100	33.9562	-5.61432	1.76522	-3.18052	0.0014701	0.00568937	CCHC-type superfamily, GAG-pre-integrase domain, Integrase, Ribonuclease H superfamily, Ribonuclease H-like superfamily, Zinc finger, catalytic core	GO:0003676, GO:0008270, GO:0015074
AeUmb.PI554389.v2.5U.G0706200	9006.74	0.581848	0.15329	3.79573	0.000147211	0.000745858	C-terminal, P-loop containing nucleoside triphosphate hydrolase, Tr-type G domain, Translation elongation factor EF1A, Translation elongation factor EF1A/initiation factor IF2gamma, Translation elongation factor EFTu-like, Translation elongation factor EFTu/EF1A, Translation protein, Translational (tr)-type GTP-binding domain, beta-barrel domain superfamily, conserved site, domain 2, eukaryotic/a…	GO:0003746, GO:0003924, GO:0005525, GO:0006414
AeUmb.PI554389.v2.5U.G0706300	8906.65	-0.44336	0.132325	-3.35054	0.000806553	0.00335993	C-terminal, P-loop containing nucleoside triphosphate hydrolase, Tr-type G domain, Translation elongation factor EF1A, Translation elongation factor EF1A/initiation factor IF2gamma, Translation elongation factor EFTu-like, Translation elongation factor EFTu/EF1A, Translation protein, Translational (tr)-type GTP-binding domain, beta-barrel domain superfamily, conserved site, domain 2, eukaryotic/a…	GO:0003746, GO:0003924, GO:0005525, GO:0006414
AeUmb.PI554389.v2.5U.G0707700	157.307	4.0364	0.684755	5.89467	3.75425e-09	4.53181e-08
AeUmb.PI554389.v2.5U.G0708600	90.7154	0.946563	0.39377	2.40385	0.0162235	0.0447146
AeUmb.PI554389.v2.5U.G0709600	290.117	-1.10417	0.232104	-4.75722	1.96282e-06	1.485e-05
AeUmb.PI554389.v2.5U.G0710200	114.88	0.90058	0.312547	2.88142	0.00395888	0.0134926	Brix domain, Ribosome biogenesis protein Rpf2	GO:0000027, GO:0000470, GO:0006364, GO:0019843
AeUmb.PI554389.v2.5U.G0710400	599.307	-1.01678	0.158607	-6.41067	1.44882e-10	2.17807e-09
AeUmb.PI554389.v2.5U.G0710600	5441.87	-0.876063	0.242155	-3.61778	0.00029714	0.00139179
AeUmb.PI554389.v2.5U.G0711700	29.6653	3.17533	1.11687	2.84306	0.00446824	0.0149844
AeUmb.PI554389.v2.5U.G0714200	133.826	2.61873	0.358471	7.30528	2.76695e-13	6.19936e-12	Apoptotic protease-activating factors, Disease resistance protein, Leucine-rich repeat domain superfamily, N-terminal, NB-ARC, P-loop containing nucleoside triphosphate hydrolase, Rx, Virus X resistance protein-like, Winged helix-like DNA-binding domain superfamily, coiled-coil domain, helical domain, plants	GO:0006952, GO:0043531
AeUmb.PI554389.v2.5U.G0714500	344.1	-0.843472	0.163311	-5.16481	2.40687e-07	2.14431e-06
AeUmb.PI554389.v2.5U.G0714600	64.3442	-8.91669	1.49374	-5.96937	2.38169e-09	2.96749e-08	AAA lid domain, AAA+ ATPase domain, AAA-type, ATPase, C-terminal, Clp ATPase, ClpA/B, ClpA/B family, ClpA/ClpB, P-loop containing nucleoside triphosphate hydrolase, conserved site 1, core	GO:0005524, GO:0016887
AeUmb.PI554389.v2.5U.G0715900	15.1185	4.91776	1.17682	4.17885	2.92986e-05	0.000174223
AeUmb.PI554389.v2.5U.G0716000	770.881	-0.995883	0.160605	-6.20083	5.61655e-10	7.73865e-09	Amine oxidase, FAD/NAD(P)-binding domain superfamily	GO:0016491
AeUmb.PI554389.v2.5U.G0716100	77.0951	-2.58193	0.448214	-5.76049	8.387e-09	9.54065e-08	Acyl transferase/acyl hydrolase/lysophospholipase, Patatin-like phospholipase domain	GO:0006629
AeUmb.PI554389.v2.5U.G0717800	6.917	-4.34878	1.7342	-2.50766	0.0121535	0.0351221
AeUmb.PI554389.v2.5U.G0718300	1858.89	-0.414457	0.124662	-3.32466	0.00088528	0.00364764	Glycolipid transfer protein domain, Glycolipid transfer protein superfamily	GO:0005737, GO:0120009, GO:0120013
AeUmb.PI554389.v2.5U.G0718900	121.917	1.9011	0.415294	4.57772	4.70079e-06	3.30171e-05
AeUmb.PI554389.v2.5U.G0719600	15728.9	-1.04162	0.416469	-2.50106	0.0123821	0.0356767	C-terminal alpha helical domain, C-terminal domain superfamily, C-terminal-like, Glutathione S-transferase, Glutathione S-transferase Omega/Tau-like, Glutathione S-transferases Tau, N-terminal, Thioredoxin-like superfamily, plant	GO:0004364, GO:0006749
AeUmb.PI554389.v2.5U.G0719800	155651	-0.464857	0.182772	-2.54338	0.0109787	0.0322452	Aldolase-type TIM barrel, Alpha-hydroxy acid dehydrogenase, FMN hydroxy acid dehydrogenase domain, FMN-dependent, FMN-dependent alpha-hydroxy acid dehydrogenase, FMN-dependent dehydrogenase, active site	GO:0010181, GO:0016491
AeUmb.PI554389.v2.5U.G0720600	47.6293	1.80299	0.518328	3.47846	0.000504301	0.00221508	CCHC-type, CCHC-type superfamily, GRF-type, Zinc finger	GO:0003676, GO:0008270
AeUmb.PI554389.v2.5U.G0721800	652.184	1.4632	0.305909	4.78312	1.72598e-06	1.31736e-05	N-terminal domain, SNARE, Syntaxin, Syntaxin/epimorphin, Target SNARE coiled-coil homology domain, conserved site	GO:0005484, GO:0006886, GO:0016020, GO:0016192
AeUmb.PI554389.v2.5U.G0722200	18.5893	-4.24717	0.968059	-4.38731	1.14763e-05	7.43949e-05
AeUmb.PI554389.v2.5U.G0723100	281.573	-0.765294	0.231493	-3.3059	0.000946716	0.00386754	Protein kinase domain, Protein kinase-like domain superfamily, Serine/threonine-protein kinase, active site	GO:0004672, GO:0005524, GO:0006468
AeUmb.PI554389.v2.5U.G0723800	9.06964	6.12083	1.57352	3.88991	0.000100283	0.000527931
AeUmb.PI554389.v2.5U.G0726900	32.1692	-6.232	1.17407	-5.30803	1.10814e-07	1.05147e-06
AeUmb.PI554389.v2.5U.G0732400	171.223	5.22349	1.08713	4.80486	1.54864e-06	1.19073e-05
AeUmb.PI554389.v2.5U.G0734000	232.801	1.43701	0.588988	2.4398	0.0146952	0.0411928	Acyl-CoA N-acyltransferase, GNAT domain	GO:0016747
AeUmb.PI554389.v2.5U.G0736000	5.5643	-5.8519	2.25091	-2.59979	0.00932814	0.0280718	CCHC-type, CCHC-type superfamily, Domain of unknown function DUF4219, Zinc finger	GO:0003676, GO:0008270
AeUmb.PI554389.v2.5U.G0738300	208.649	0.818931	0.304992	2.68509	0.00725106	0.0226814	Leucine-rich repeat, Leucine-rich repeat domain superfamily, Leucine-rich repeat-containing N-terminal, plant-type	GO:0005515
AeUmb.PI554389.v2.5U.G0738500	64.4415	1.29922	0.415898	3.12389	0.00178475	0.00674305	Ankyrin repeat, Ankyrin repeat-containing domain superfamily, PGG domain	GO:0005515
AeUmb.PI554389.v2.5U.G0739000	53.7537	8.55533	1.21827	7.02253	2.17884e-12	4.32645e-11
AeUmb.PI554389.v2.5U.G0739100	407.603	1.1429	0.187258	6.10333	1.03879e-09	1.37241e-08
AeUmb.PI554389.v2.5U.G0739200	11.2654	6.94504	1.46028	4.75598	1.9749e-06	1.4919e-05	Transcription factor IIA, alpha/beta subunit, beta-barrel	GO:0005672, GO:0006367
AeUmb.PI554389.v2.5U.G0739500	84.28	-7.00494	0.919916	-7.61476	2.64187e-14	6.88436e-13
AeUmb.PI554389.v2.5U.G0739900	3.40515	6.29018	2.08411	3.01816	0.00254311	0.00919515
AeUmb.PI554389.v2.5U.G0740200	1675.94	-0.632806	0.121358	-5.21438	1.8443e-07	1.68487e-06
AeUmb.PI554389.v2.5U.G0740400	524.281	0.783199	0.234382	3.34155	0.000833112	0.00346007
AeUmb.PI554389.v2.5U.G0740600	107.997	-9.96667	1.52182	-6.54918	5.78537e-11	9.24007e-10	F-box domain, F-box-like domain superfamily	GO:0005515
AeUmb.PI554389.v2.5U.G0742500	2891.21	-1.03459	0.24505	-4.22196	2.42192e-05	0.000146881
AeUmb.PI554389.v2.5U.G0744000	64.4204	6.53424	1.39379	4.68811	2.75735e-06	2.0208e-05	MFS transporter superfamily, Major facilitator, Major facilitator superfamily domain, Sugar transporter, Sugar/inositol transporter, conserved site, sugar transporter-like	GO:0016020, GO:0022857, GO:0055085
AeUmb.PI554389.v2.5U.G0744300	19.0853	-7.91579	1.7057	-4.64078	3.47089e-06	2.49294e-05	BTB/POZ and MATH domain-containing protein 1-6, BTB/POZ domain, MATH/TRAF domain, SKP1/BTB/POZ domain superfamily	GO:0005515, GO:0016567
AeUmb.PI554389.v2.5U.G0744900	4.35812	5.57828	1.82987	3.04846	0.00230014	0.00841791	Aldolase-type TIM barrel, Ribulose-phosphate binding barrel, Tryptophan synthase, active site, alpha chain	GO:0004834, GO:0006568
AeUmb.PI554389.v2.5U.G0745200	503.847	-0.53743	0.167168	-3.2149	0.00130489	0.00512754	Pseudouridine synthase, RluA-like, RluC/RluD, RsuA/RluA-like, catalytic domain superfamily, conserved site	GO:0001522, GO:0003723, GO:0009451, GO:0009982
AeUmb.PI554389.v2.5U.G0745700	55.4655	6.08563	2.102	2.89516	0.00378965	0.0129843	Aldolase-type TIM barrel, Ribulose-phosphate binding barrel, Tryptophan synthase, alpha chain	GO:0004834, GO:0006568
AeUmb.PI554389.v2.5U.G0747200	86.5395	4.18291	0.623519	6.70855	1.96568e-11	3.377e-10	Leucine-rich repeat, Leucine-rich repeat domain superfamily, Leucine-rich repeat-containing N-terminal, plant-type, typical subtype	GO:0005515
AeUmb.PI554389.v2.5U.G0747400	1494.69	0.546288	0.12514	4.36542	1.2688e-05	8.15844e-05	AAA+ ATPase domain, ATP-binding domain, C-terminal, C-terminal helicase domain, DNA2/NAM7 helicase, DNA2/NAM7 helicase-like, Helicase SMUBP-2/Hcs1-like, Helicase superfamily 1/2, P-loop containing nucleoside triphosphate hydrolase, Upf1-like, helicase domain	GO:0003677, GO:0004386, GO:0005524, GO:0016887
AeUmb.PI554389.v2.5U.G0747500	26.4507	2.23173	0.620214	3.59831	0.000320288	0.00148455	ApaH type, Calcineurin-like phosphoesterase domain, Iron/zinc purple acid phosphatase-like C-terminal domain, Metallo-dependent phosphatase-like, N-terminal, Purple acid phosphatase, Purple acid phosphatase-like, metallophosphatase domain	GO:0003993, GO:0016787, GO:0046872
AeUmb.PI554389.v2.5U.G0747800	2883.06	-0.720733	0.116764	-6.17254	6.7201e-10	9.15473e-09	Eukaryotic translation initiation factor 3 subunit B, Nucleotide-binding alpha-beta plait domain superfamily, RNA recognition motif, RNA recognition motif domain, RNA-binding domain superfamily, Translation initiation factor, WD40/YVTN repeat-like-containing domain superfamily, beta propellor-like domain, eIF3B	GO:0003676, GO:0003723, GO:0003743, GO:0005515, GO:0005852, GO:0006413, GO:0031369
AeUmb.PI554389.v2.5U.G0748000	10.747	-6.10801	1.80427	-3.3853	0.000710999	0.00301046	Ankyrin repeat, Ankyrin repeat-containing domain superfamily, Tetratricopeptide repeat, Tetratricopeptide-like helical domain superfamily	GO:0005515
AeUmb.PI554389.v2.5U.G0748300	4.00169	-5.05421	1.89727	-2.66394	0.0077232	0.0239237	Ankyrin repeat, Ankyrin repeat-containing domain superfamily, Tetratricopeptide repeat, Tetratricopeptide-like helical domain superfamily	GO:0005515
AeUmb.PI554389.v2.5U.G0749800	6511.54	0.823116	0.207992	3.95743	7.57592e-05	0.000408878	Linker histone H1/H5, Winged helix DNA-binding domain superfamily, Winged helix-like DNA-binding domain superfamily, domain H15	GO:0000786, GO:0003677, GO:0006334, GO:0030527
AeUmb.PI554389.v2.5U.G0750100	105.803	1.53503	0.349513	4.39192	1.12354e-05	7.2952e-05
AeUmb.PI554389.v2.5U.G0751000	76.4898	1.23843	0.421793	2.93612	0.00332347	0.0116035	ATP binding site, EGF-like calcium-binding, EGF-like calcium-binding domain, EGF-like domain, Protein kinase, Protein kinase domain, Protein kinase-like domain superfamily, Receptor-like kinase WAK-like, Serine/threonine-protein kinase, Wall-associated receptor kinase, active site, conserved site, galacturonan-binding domain	GO:0004672, GO:0005509, GO:0005524, GO:0006468, GO:0007166, GO:0030247
AeUmb.PI554389.v2.5U.G0752600	697.287	0.838233	0.223677	3.74751	0.000178597	0.000886585
AeUmb.PI554389.v2.5U.G0752800	318.821	-1.86857	0.296704	-6.29774	3.02012e-10	4.37476e-09
AeUmb.PI554389.v2.5U.G0753100	47.3106	-3.60255	0.604519	-5.95937	2.53213e-09	3.14197e-08	Argonaute, Argonaute linker 2 domain, Argonaute-like, Mid domain, N-terminal, PAZ domain, PAZ domain superfamily, PIWI domain, Piwi domain, Protein argonaute, Ribonuclease H superfamily, Ribonuclease H-like superfamily, linker 1 domain	GO:0003676, GO:0003723, GO:0005515
AeUmb.PI554389.v2.5U.G0753300	121.374	-0.958006	0.276527	-3.46442	0.00053137	0.00231813	Argonaute-like, PAZ domain, PAZ domain superfamily, PIWI domain, Piwi domain, Ribonuclease H superfamily, Ribonuclease H-like superfamily, Ubiquitin-like domain, Ubiquitin-like domain superfamily	GO:0003676, GO:0003723, GO:0005515
AeUmb.PI554389.v2.5U.G0753500	1089.34	0.78308	0.14343	5.45966	4.77035e-08	4.80728e-07
AeUmb.PI554389.v2.5U.G0753800	587.425	12.2303	1.18637	10.3091	6.41311e-25	6.43484e-23
AeUmb.PI554389.v2.5U.G0754400	62.4798	-6.7623	1.04634	-6.46279	1.0279e-10	1.58633e-09	C-terminal, Splicing factor Cactin, Splicing factor cactin, central domain	GO:0005515
AeUmb.PI554389.v2.5U.G0754900	286.488	-11.0262	1.44876	-7.61078	2.72441e-14	7.08112e-13
AeUmb.PI554389.v2.5U.G0755000	2.7665	-5.81512	2.41977	-2.40317	0.0162535	0.0447809
AeUmb.PI554389.v2.5U.G0755100	388.936	-12.3195	1.47527	-8.3507	6.78575e-17	2.57143e-15
AeUmb.PI554389.v2.5U.G0756000	43.1163	3.17594	0.988543	3.21275	0.0013147	0.00516409	ATP binding site, EGF-like calcium-binding, EGF-like calcium-binding domain, EGF-like domain, EGF-type aspartate/asparagine hydroxylation site, Protein kinase, Protein kinase domain, Protein kinase-like domain superfamily, Receptor-like kinase WAK-like, Serine-threonine/tyrosine-protein kinase, Serine/threonine-protein kinase, Wall-associated receptor kinase, active site, catalytic domain, conser…	GO:0004672, GO:0005509, GO:0005524, GO:0006468, GO:0007166, GO:0030247
AeUmb.PI554389.v2.5U.G0757400	11.488	-4.75327	1.34371	-3.53742	0.000404058	0.0018233	Argonaute, Argonaute linker 2 domain, Mid domain, N-terminal, PAZ domain, PAZ domain superfamily, Piwi domain, Protein argonaute, Ribonuclease H superfamily, Ribonuclease H-like superfamily, linker 1 domain	GO:0003676, GO:0003723, GO:0005515
AeUmb.PI554389.v2.5U.G0757800	595.809	8.03382	0.492846	16.3009	9.73114e-60	7.5359e-57
AeUmb.PI554389.v2.5U.G0758100	225.233	0.957751	0.372317	2.57241	0.0100994	0.0300545	Forkhead-associated (FHA) domain, Microspherule protein, Microspherule protein 1, N-terminal domain, SMAD/FHA domain superfamily	GO:0002151, GO:0005515, GO:0031011, GO:0071339
AeUmb.PI554389.v2.5U.G0758200	18.0984	6.9157	1.27631	5.41852	6.00953e-08	5.95863e-07
AeUmb.PI554389.v2.5U.G0758300	93.4216	-9.42536	1.46435	-6.43657	1.22205e-10	1.86217e-09
AeUmb.PI554389.v2.5U.G0759100	353.569	2.67018	0.573509	4.65586	3.22635e-06	2.3373e-05	ATP binding site, EGF-like calcium-binding, EGF-like calcium-binding domain, EGF-like domain, EGF-type aspartate/asparagine hydroxylation site, Protein kinase, Protein kinase domain, Protein kinase-like domain superfamily, Receptor-like kinase WAK-like, Serine-threonine/tyrosine-protein kinase, Serine/threonine-protein kinase, Wall-associated receptor kinase, active site, catalytic domain, conser…	GO:0004672, GO:0005509, GO:0005524, GO:0006468, GO:0007166, GO:0030247
AeUmb.PI554389.v2.5U.G0759200	157.171	4.01972	0.541835	7.41871	1.1827e-13	2.79936e-12	Argonaute, Argonaute linker 2 domain, Mid domain, N-terminal, PAZ domain, PAZ domain superfamily, Piwi domain, Protein argonaute, Ribonuclease H superfamily, Ribonuclease H-like superfamily, Ubiquitin-like domain, linker 1 domain	GO:0003676, GO:0003723, GO:0005515
AeUmb.PI554389.v2.5U.G0759400	43.294	8.56971	1.2302	6.96609	3.25864e-12	6.31285e-11	Carbohydrate kinase, P-loop containing nucleoside triphosphate hydrolase, thermoresistant glucokinase	GO:0005975, GO:0016301
AeUmb.PI554389.v2.5U.G0760100	133.33	-10.6151	1.4646	-7.24777	4.23697e-13	9.21273e-12
AeUmb.PI554389.v2.5U.G0760400	25.9127	1.54425	0.468859	3.29364	0.000988998	0.00402123
AeUmb.PI554389.v2.5U.G0762900	873.925	1.73723	0.307882	5.6425	1.67603e-08	1.81823e-07	AAA+ ATPase domain, AAA-type, AAA-type ATPase, ATPase, N-terminal domain, P-loop containing nucleoside triphosphate hydrolase, conserved site, core	GO:0005524, GO:0016887
AeUmb.PI554389.v2.5U.G0763500	144.095	2.92069	0.467944	6.24155	4.3326e-10	6.10323e-09	ATP binding site, Adaptor protein Cbl, MCAfunc domain, N-terminal domain superfamily, Protein kinase, Protein kinase domain, Protein kinase-like domain superfamily, Serine/threonine-protein kinase-like protein CCR3/CCR4	GO:0004672, GO:0004674, GO:0005524, GO:0006468, GO:0007166
AeUmb.PI554389.v2.5U.G0764500	404.358	6.5896	0.351727	18.735	2.56633e-78	4.84427e-75	ATP binding site, Protein kinase, Protein kinase domain, Protein kinase-like domain superfamily, Receptor-like protein kinase ANXUR1-like, Serine-threonine/tyrosine-protein kinase, Serine/threonine-protein kinase, active site, catalytic domain	GO:0004672, GO:0004714, GO:0005524, GO:0006468
AeUmb.PI554389.v2.5U.G0765300	18.9594	-7.47307	1.5902	-4.69946	2.60853e-06	1.92154e-05	Alpha/Beta hydrolase fold, Alpha/beta hydrolase fold-3	GO:0016787
AeUmb.PI554389.v2.5U.G0767200	4.41156	4.68214	1.57438	2.97395	0.0029399	0.0104447	Protein kinase domain, Protein kinase-like domain superfamily, Serine/threonine-protein kinase, active site	GO:0004672, GO:0005524, GO:0006468
AeUmb.PI554389.v2.5U.G0767300	117.121	8.1158	1.04817	7.74281	9.72445e-15	2.68954e-13
AeUmb.PI554389.v2.5U.G0767500	284.472	1.44101	0.303042	4.75516	1.98291e-06	1.49719e-05	Concanavalin A-like lectin/glucanase domain superfamily, Galectin, Glycosyl transferase, Nucleotide-diphospho-sugar transferases, carbohydrate recognition domain, family 31	GO:0006486, GO:0016020, GO:0016758, GO:0030246
AeUmb.PI554389.v2.5U.G0768500	980.983	-1.03859	0.27168	-3.82284	0.000131924	0.000676004
AeUmb.PI554389.v2.5U.G0768600	209.201	1.0272	0.287874	3.56822	0.000359412	0.00164146	Concanavalin A-like lectin/glucanase domain superfamily, Galectin, Glycosyl transferase, carbohydrate recognition domain, family 31	GO:0006486, GO:0016020, GO:0016758, GO:0030246
AeUmb.PI554389.v2.5U.G0768700	232.605	3.73842	0.565574	6.60995	3.84456e-11	6.3277e-10	Cytochrome P450, Cytochrome P450 superfamily, E-class, conserved site, group I	GO:0004497, GO:0005506, GO:0016705, GO:0020037
AeUmb.PI554389.v2.5U.G0768800	9.04841	-5.07304	1.63712	-3.09876	0.00194331	0.00725667
AeUmb.PI554389.v2.5U.G0769000	6.17594	5.2911	1.4836	3.56639	0.000361931	0.00165113
AeUmb.PI554389.v2.5U.G0769300	15.3969	5.08359	0.980574	5.18431	2.16821e-07	1.94604e-06	CCHC-type, CCHC-type superfamily, Zinc finger	GO:0003676, GO:0008270
AeUmb.PI554389.v2.5U.G0769500	683.833	-0.65373	0.235028	-2.7815	0.0054109	0.0176689	Alpha-Amylase Inhibitors (AAI), Bifunctional inhibitor/plant lipid transfer protein/seed storage helical domain, Bifunctional inhibitor/plant lipid transfer protein/seed storage helical domain superfamily, Lipid Transfer (LT) and Seed Storage (SS) Protein, Plant non-specific lipid-transfer protein/Par allergen	GO:0006869, GO:0008289
AeUmb.PI554389.v2.5U.G0769800	18.2632	3.09213	0.783151	3.94832	7.87028e-05	0.000423026	F-box-like domain superfamily, Galactose oxidase/kelch, beta-propeller	GO:0005515
AeUmb.PI554389.v2.5U.G0770200	959.844	-0.548126	0.202048	-2.71285	0.00667068	0.0211182	C-terminal, Cullin repeat-like-containing domain superfamily, Exocyst complex component Exo84, Exocyst component Exo84, subdomain 1, subdomain 2	GO:0000145, GO:0006887
AeUmb.PI554389.v2.5U.G0770400	3.56866	5.6529	1.73878	3.25107	0.0011497	0.00459121
AeUmb.PI554389.v2.5U.G0770700	7.99284	-7.20817	1.74334	-4.13469	3.55429e-05	0.000207433	UDP-glucuronosyl/UDP-glucosyltransferase, UDP-glycosyltransferase family, conserved site	GO:0008194
AeUmb.PI554389.v2.5U.G0770900	289.075	2.37789	0.326082	7.29231	3.04681e-13	6.79613e-12	UDP-glucuronosyl/UDP-glucosyltransferase, UDP-glycosyltransferase family, conserved site	GO:0008194
AeUmb.PI554389.v2.5U.G0771000	2415.61	-1.14177	0.386834	-2.95157	0.00316166	0.0111105	EF-Hand 1, EF-hand domain, EF-hand domain pair, calcium-binding site	GO:0005509
AeUmb.PI554389.v2.5U.G0772600	56.677	-2.37864	0.724242	-3.28432	0.0010223	0.00413713	Glyoxalase I, Glyoxalase/Bleomycin resistance protein/Dihydroxybiphenyl dioxygenase, Glyoxalase/fosfomycin resistance/dioxygenase domain, Vicinal oxygen chelate (VOC) domain, conserved site	GO:0004462, GO:0046872
AeUmb.PI554389.v2.5U.G0773000	643.256	1.20549	0.195292	6.17275	6.71136e-10	9.14695e-09
AeUmb.PI554389.v2.5U.G0773100	678.358	-1.02928	0.156458	-6.57861	4.74878e-11	7.72752e-10
AeUmb.PI554389.v2.5U.G0773200	61.426	1.08714	0.37865	2.87109	0.0040906	0.0138985
AeUmb.PI554389.v2.5U.G0773300	65.7972	1.0695	0.393425	2.71843	0.00655922	0.0208221
AeUmb.PI554389.v2.5U.G0773500	166.401	4.45512	0.956494	4.65777	3.19659e-06	2.31797e-05
AeUmb.PI554389.v2.5U.G0773700	37.1134	-1.57062	0.48258	-3.25464	0.00113537	0.00454319
AeUmb.PI554389.v2.5U.G0774300	331.591	11.6306	1.19612	9.72363	2.39106e-22	1.76997e-20
AeUmb.PI554389.v2.5U.G0774900	392.623	-2.96284	0.289957	-10.2182	1.64355e-24	1.57583e-22	Pheophorbide a oxygenase, Rieske [2Fe-2S] iron-sulphur domain, Rieske [2Fe-2S] iron-sulphur domain superfamily	GO:0010277, GO:0051537
AeUmb.PI554389.v2.5U.G0775900	461.456	-0.571844	0.144374	-3.96085	7.46848e-05	0.00040409
AeUmb.PI554389.v2.5U.G0776400	178.503	-0.844523	0.307842	-2.74337	0.00608124	0.0195098
AeUmb.PI554389.v2.5U.G0777100	226.989	-0.914098	0.362221	-2.52359	0.0116162	0.0338381
AeUmb.PI554389.v2.5U.G0781300	6386	-0.577004	0.185757	-3.10624	0.00189485	0.00709148	Cellulose synthase, Nucleotide-diphospho-sugar transferases, RING-type zinc finger, RING/FYVE/PHD-type, Zinc finger	GO:0016020, GO:0016760, GO:0030244
AeUmb.PI554389.v2.5U.G0782600	16.7051	-4.60141	1.3956	-3.29709	0.000976915	0.00397585
AeUmb.PI554389.v2.5U.G0782700	508.437	-0.649399	0.185601	-3.49889	0.000467191	0.00207075	Forkhead-associated (FHA) domain, PPM-type phosphatase, PPM-type phosphatase-like domain, PPM-type phosphatase-like domain superfamily, Protein phosphatase 2C family, SMAD/FHA domain superfamily, divalent cation binding	GO:0004722, GO:0005515, GO:0006470, GO:0043169
AeUmb.PI554389.v2.5U.G0783100	2381.24	-1.21675	0.312566	-3.89276	9.91089e-05	0.000522441	GDSL lipase/esterase, GDSL lipase/esterase-like, SGNH hydrolase superfamily, plant	GO:0016788
AeUmb.PI554389.v2.5U.G0783800	1430.25	-0.391896	0.155345	-2.52274	0.0116444	0.0339071	Nucleotide-binding alpha-beta plait domain superfamily, RNA recognition motif domain, RNA-binding domain superfamily	GO:0003676, GO:0003723
AeUmb.PI554389.v2.5U.G0783900	1203.7	1.03595	0.267068	3.87896	0.000104902	0.000549473	UDP-glucuronosyl/UDP-glucosyltransferase, UDP-glycosyltransferase family, conserved site	GO:0008194
AeUmb.PI554389.v2.5U.G0784000	37.3852	-1.82507	0.568125	-3.21245	0.00131609	0.0051682	UDP-glucuronosyl/UDP-glucosyltransferase, UDP-glycosyltransferase family, conserved site	GO:0008194
AeUmb.PI554389.v2.5U.G0784500	899.637	0.834172	0.254154	3.28215	0.0010302	0.00416686	ApaH type, Calcineurin-like phosphoesterase domain, Iron/zinc purple acid phosphatase-like C-terminal domain, Metallo-dependent phosphatase-like, N-terminal, Purple acid phosphatase, Purple acid phosphatase-like, metallophosphatase domain	GO:0003993, GO:0016787, GO:0046872
AeUmb.PI554389.v2.5U.G0784600	251.934	1.02062	0.230819	4.42173	9.79154e-06	6.43718e-05	MFS transporter superfamily, Major facilitator superfamily, Major facilitator superfamily domain, Protein spinster-like	GO:0022857, GO:0055085
AeUmb.PI554389.v2.5U.G0784900	19.4115	2.19113	0.848061	2.58369	0.00977493	0.0292444	MADS-box, MADS-box superfamily, Transcription factor	GO:0003677, GO:0046983
AeUmb.PI554389.v2.5U.G0785100	91.218	9.80708	1.20802	8.11828	4.72823e-16	1.59734e-14
AeUmb.PI554389.v2.5U.G0785400	24.413	-7.16373	1.57117	-4.55948	5.12814e-06	3.57559e-05	BTB/POZ and MATH domain-containing protein 1-6, BTB/POZ domain, MATH/TRAF domain, SKP1/BTB/POZ domain superfamily, TRAF-like	GO:0005515, GO:0016567
AeUmb.PI554389.v2.5U.G0785600	23.0425	2.27892	0.692951	3.28872	0.00100645	0.00408286
AeUmb.PI554389.v2.5U.G0785900	35.6937	1.22625	0.481767	2.54532	0.0109177	0.0321037
AeUmb.PI554389.v2.5U.G0788500	60.3457	2.43197	0.608307	3.99793	6.38985e-05	0.00035121	ATP binding site, Concanavalin A-like lectin/glucanase domain superfamily, Legume lectin domain, Protein kinase, Protein kinase domain, Protein kinase-like domain superfamily, Serine/threonine-protein kinase, active site	GO:0004672, GO:0005524, GO:0006468, GO:0030246
AeUmb.PI554389.v2.5U.G0788600	33.927	4.13204	0.747328	5.52908	3.21909e-08	3.3307e-07	ATP binding site, Concanavalin A-like lectin/glucanase domain superfamily, Legume lectin domain, Protein kinase, Protein kinase domain, Protein kinase-like domain superfamily, Serine/threonine-protein kinase, active site	GO:0004672, GO:0005524, GO:0006468, GO:0030246
AeUmb.PI554389.v2.5U.G0788700	458.767	-1.50989	0.393623	-3.83588	0.000125117	0.000643308	UDP-glucuronosyl/UDP-glucosyltransferase, UDP-glycosyltransferase family, conserved site	GO:0008194
AeUmb.PI554389.v2.5U.G0791100	27.5309	4.04332	1.53277	2.63792	0.00834157	0.0255418
AeUmb.PI554389.v2.5U.G0791200	76.2101	1.92088	0.358934	5.35163	8.71654e-08	8.39467e-07	Wall-associated receptor kinase, galacturonan-binding domain	GO:0030247
AeUmb.PI554389.v2.5U.G0791400	10502.7	-0.761873	0.236586	-3.22028	0.00128066	0.00504481
AeUmb.PI554389.v2.5U.G0791500	1430.71	-0.336974	0.141281	-2.38514	0.0170725	0.046667	EF hand associated, EF-Hand 1, EF-hand domain, EF-hand domain pair, MIRO domain, Mitochondrial Rho GTPase, Mitochondrial Rho GTPase 1/3, P-loop containing nucleoside triphosphate hydrolase, Small GTPase, Small GTPase Rho, calcium-binding site, type-1, type-2	GO:0003924, GO:0005509, GO:0005525, GO:0005741, GO:0007005, GO:0007264
AeUmb.PI554389.v2.5U.G0791900	48.3202	5.88764	1.31619	4.47326	7.70351e-06	5.16223e-05
AeUmb.PI554389.v2.5U.G0792200	39.792	1.62853	0.533811	3.05076	0.00228261	0.00836033	Nucleotide-binding alpha-beta plait domain superfamily, RNA recognition motif domain, RNA-binding domain superfamily	GO:0003676, GO:0003723
AeUmb.PI554389.v2.5U.G0792400	62.9475	1.66273	0.440931	3.77094	0.000162633	0.000814972
AeUmb.PI554389.v2.5U.G0792900	52.6584	6.51123	1.77171	3.67512	0.000237741	0.00114426	Bowman-Birk, Bowman-Birk type wound-induced proteinase inhibitor WIP1, Proteinase inhibitor I12	GO:0004867, GO:0005576
AeUmb.PI554389.v2.5U.G0793400	562.132	0.554858	0.164664	3.36965	0.000752644	0.00316504	Cyclophilin-like domain superfamily, Cyclophilin-type peptidyl-prolyl cis-trans isomerase, Cyclophilin-type peptidyl-prolyl cis-trans isomerase domain, conserved site	GO:0000413, GO:0003755, GO:0006457
AeUmb.PI554389.v2.5U.G0794100	81.3277	1.23699	0.508084	2.43461	0.0149077	0.0417083
AeUmb.PI554389.v2.5U.G0794200	21.9862	1.97865	0.74237	2.66532	0.00769154	0.0238354
AeUmb.PI554389.v2.5U.G0794300	3.7486	-4.50663	1.83272	-2.45899	0.0139329	0.0394083
AeUmb.PI554389.v2.5U.G0794700	80.2135	9.08892	1.24537	7.29819	2.91664e-13	6.52022e-12
AeUmb.PI554389.v2.5U.G0795000	1999.52	-0.493877	0.118004	-4.18526	2.84838e-05	0.000169812	E3 ubiquitin-protein ligase RNF126-like, RING-type, RING/FYVE/PHD-type, Zinc finger, zinc-ribbon	GO:0061630
AeUmb.PI554389.v2.5U.G0795900	5355.75	0.893287	0.367244	2.43241	0.0149989	0.0419131	NAC domain, NAC domain superfamily	GO:0003677, GO:0006355
AeUmb.PI554389.v2.5U.G0796100	37.4887	7.80378	1.22133	6.38956	1.66369e-10	2.48255e-09
AeUmb.PI554389.v2.5U.G0798500	92.8807	1.38104	0.307763	4.48733	7.21205e-06	4.87945e-05
AeUmb.PI554389.v2.5U.G0799100	48.2703	1.78317	0.592521	3.00946	0.00261712	0.00943337
AeUmb.PI554389.v2.5U.G0799500	67.0075	1.01207	0.345399	2.93014	0.00338813	0.0118012
AeUmb.PI554389.v2.5U.G0801800	24.867	-7.49532	1.5531	-4.82602	1.39287e-06	1.08087e-05
AeUmb.PI554389.v2.5U.G0803300	1037.38	-0.90809	0.336759	-2.69656	0.00700608	0.022007
AeUmb.PI554389.v2.5U.G0805000	10.5386	-6.83285	1.69052	-4.04187	5.30263e-05	0.000297124	SNU66/SART1 family	GO:0000398
AeUmb.PI554389.v2.5U.G0805200	843.743	-1.28691	0.357689	-3.59785	0.000320857	0.00148696
AeUmb.PI554389.v2.5U.G0805700	37.8807	3.16976	0.810827	3.9093	9.25658e-05	0.000490985
AeUmb.PI554389.v2.5U.G0805900	12.6026	5.12009	1.37194	3.73201	0.000189955	0.000936657
AeUmb.PI554389.v2.5U.G0806400	504.807	-0.572771	0.197799	-2.89572	0.00378289	0.0129698	Histidine acid phosphatase, Histidine acid phosphatase active site, Histidine phosphatase superfamily, clade-2, eukaryotic	GO:0016791
AeUmb.PI554389.v2.5U.G0806700	2576.31	-3.96908	0.277467	-14.3047	2.04539e-46	7.81962e-44
AeUmb.PI554389.v2.5U.G0807100	2102.46	-0.857504	0.203067	-4.22276	2.41333e-05	0.000146419	AP2/ERF domain, AP2/ERF domain superfamily, DNA-binding domain superfamily	GO:0003677, GO:0003700, GO:0006355
AeUmb.PI554389.v2.5U.G0807800	1096.23	-1.34967	0.18236	-7.40113	1.35033e-13	3.17623e-12	ACT domain, ACT domain 1, ACT domain 2, ACT-like domain, Acetylglutamate kinase-like superfamily, Aspartate kinase, Aspartate/glutamate/uridylate kinase, Aspartokinase 1, Aspartokinase/Bifunctional aspartokinase/homoserine dehydrogenase, Lysine-sensitive aspartokinase catalytic domain, catalytic domain, conserved site	GO:0004072, GO:0008652
AeUmb.PI554389.v2.5U.G0808000	425.11	1.05902	0.206817	5.12059	3.04581e-07	2.67645e-06	Aminopeptidase, Aminopeptidase N-like , Armadillo-type fold, C-terminal domain superfamily, CTD superfamily, LTA-4 hydrolase/aminopeptidase, N-terminal domain, N-terminal domain superfamliy, Peptidase M1, Peptidase M4/M1, alanine aminopeptidase/leukotriene A4 hydrolase, leukotriene A4 hydrolase-like, leukotriene A4 hydrolase/aminopeptidase C-terminal, membrane alanine aminopeptidase	GO:0006508, GO:0008237, GO:0008270
AeUmb.PI554389.v2.5U.G0808400	17.2076	6.41446	2.06479	3.10659	0.00189257	0.00708472	C-terminal, Chalcone/stilbene synthase, N-terminal, Polyketide synthase, Thiolase-like, type III	GO:0009058, GO:0016746, GO:0016747
AeUmb.PI554389.v2.5U.G0809800	1690.44	0.704279	0.181762	3.87473	0.000106742	0.000558043	Leucine-rich repeat, Leucine-rich repeat domain superfamily, typical subtype	GO:0005515
AeUmb.PI554389.v2.5U.G0809900	130.161	1.74575	0.306822	5.68978	1.27203e-08	1.40932e-07	Armadillo, Armadillo-like helical, Armadillo-type fold	GO:0005515
AeUmb.PI554389.v2.5U.G0810800	889.89	0.684227	0.222129	3.08031	0.00206786	0.00766958	2-oxo acid dehydrogenase, 2-oxoacid dehydrogenase acyltransferase, Biotin/lipoyl attachment, Chloramphenicol acetyltransferase-like domain superfamily, Dihydrolipoamide acetyltransferase/Pyruvate dehydrogenase protein X component, E3-binding domain superfamily, Peripheral subunit-binding domain, Single hybrid motif, catalytic domain, lipoyl-binding site	GO:0006086, GO:0016746, GO:0045254
AeUmb.PI554389.v2.5U.G0813200	58.7028	2.27986	0.959145	2.37697	0.0174556	0.0475507
AeUmb.PI554389.v2.5U.G0813300	21.7447	2.60433	0.981264	2.65406	0.00795298	0.0245574
AeUmb.PI554389.v2.5U.G0813400	2530.02	-0.674645	0.265072	-2.54514	0.0109234	0.0321142	ADF-H/Gelsolin-like domain superfamily, ADF/Cofilin, Actin-depolymerising factor homology domain	GO:0003779, GO:0015629, GO:0030042
AeUmb.PI554389.v2.5U.G0813700	100.475	6.15055	0.644387	9.54481	1.36358e-21	9.23384e-20	Disease resistance protein, Leucine-rich repeat domain superfamily, N-terminal, NB-ARC, P-loop containing nucleoside triphosphate hydrolase, Rx, plants	GO:0006952, GO:0043531
AeUmb.PI554389.v2.5U.G0814900	29396.5	-0.343322	0.119891	-2.86361	0.00418843	0.0141751	ATPase, C-terminal domain superfamily, Heat shock protein 70, Heat shock protein 70 family, Heat shock protein 70kD, conserved site, nucleotide binding domain, peptide-binding domain superfamily	GO:0005524, GO:0140662
AeUmb.PI554389.v2.5U.G0815200	10.0684	-6.1974	1.73594	-3.57005	0.000356912	0.00163202
AeUmb.PI554389.v2.5U.G0815300	843.273	0.915564	0.250903	3.64907	0.000263193	0.0012518	PPM-type phosphatase-like domain, PPM-type phosphatase-like domain superfamily, Protein phosphatase 2C family	GO:0004722, GO:0006470
AeUmb.PI554389.v2.5U.G0815700	251.976	-2.1628	0.296845	-7.28597	3.19371e-13	7.10284e-12
AeUmb.PI554389.v2.5U.G0816800	9.767	-6.33414	1.82717	-3.46664	0.000527002	0.00230074
AeUmb.PI554389.v2.5U.G0816900	2.63418	-6.05447	2.16753	-2.79326	0.00521804	0.0171318
AeUmb.PI554389.v2.5U.G0817000	56.9847	-3.8876	0.620273	-6.26757	3.66724e-10	5.22689e-09	DYW domain, E motif, E+ motif, Pentatricopeptide repeat, Pentatricopeptide repeat-containing protein At4g14850-like, Tetratricopeptide-like helical domain superfamily, plant	GO:0003723, GO:0005515, GO:0008270, GO:0009451
AeUmb.PI554389.v2.5U.G0817100	471.836	-0.43788	0.162888	-2.68823	0.00718329	0.0224922
AeUmb.PI554389.v2.5U.G0818000	33.9795	-2.61534	0.660268	-3.96102	7.46289e-05	0.000403932
AeUmb.PI554389.v2.5U.G0818400	97.5288	-2.23627	0.390815	-5.72207	1.05232e-08	1.18018e-07	Disease resistance protein, Leucine-rich repeat domain superfamily, N-terminal, NB-ARC, P-loop containing nucleoside triphosphate hydrolase, Rx, plants	GO:0006952, GO:0043531
AeUmb.PI554389.v2.5U.G0818500	152.905	2.84652	0.431071	6.60336	4.01938e-11	6.60464e-10	Apoptotic protease-activating factors, Leucine-rich repeat domain superfamily, NB-ARC, P-loop containing nucleoside triphosphate hydrolase, Protein kinase domain, Protein kinase-like domain superfamily, Serine/threonine-protein kinase, Winged helix-like DNA-binding domain superfamily, active site, helical domain	GO:0004672, GO:0005524, GO:0006468, GO:0043531
AeUmb.PI554389.v2.5U.G0818700	730.678	1.9325	0.228339	8.46328	2.59966e-17	1.02903e-15
AeUmb.PI554389.v2.5U.G0819000	51.8651	-2.16968	0.615468	-3.52525	0.000423086	0.0018998	Leucine-rich repeat, Leucine-rich repeat domain superfamily, Leucine-rich repeat-containing N-terminal, plant-type, typical subtype	GO:0005515
AeUmb.PI554389.v2.5U.G0819300	63.2579	1.58418	0.362325	4.37226	1.22967e-05	7.92878e-05	FtsJ domain, Ribosomal RNA large subunit methyltransferase E, Ribosomal RNA methyltransferase, S-adenosyl-L-methionine-dependent methyltransferase superfamily	GO:0001510, GO:0008168, GO:0008757, GO:0032259
AeUmb.PI554389.v2.5U.G0819400	26.8755	-3.43775	1.12213	-3.06359	0.00218702	0.00805615	N-terminal domain, PC-Esterase, Trichome birefringence-like, Trichome birefringence-like family	GO:0016413, GO:0016740
AeUmb.PI554389.v2.5U.G0819900	72.7986	1.05891	0.38267	2.76718	0.00565442	0.0183254	Kinetochore protein Ndc80, Ndc80 domain superfamily	GO:0031262, GO:0051315
AeUmb.PI554389.v2.5U.G0820000	47.8137	8.4658	1.22391	6.91704	4.61194e-12	8.72196e-11
AeUmb.PI554389.v2.5U.G0820200	711.946	-0.461335	0.167239	-2.75854	0.00580603	0.0187364	DYW domain, E motif, E+ motif, Pentatricopeptide repeat, Pentatricopeptide repeat-containing protein At4g14850-like, Tetratricopeptide-like helical domain superfamily, plant	GO:0003723, GO:0005515, GO:0008270, GO:0009451
AeUmb.PI554389.v2.5U.G0821300	398.832	-0.391536	0.147852	-2.64816	0.00809309	0.0249111
AeUmb.PI554389.v2.5U.G0821500	49.1711	4.25665	0.72746	5.85139	4.87485e-09	5.75118e-08
AeUmb.PI554389.v2.5U.G0822600	4.43029	5.16636	1.56308	3.30525	0.000948918	0.00387444
AeUmb.PI554389.v2.5U.G0825000	24.3561	-3.56397	1.11886	-3.18535	0.0014458	0.00560611	DNA-directed RNA polymerase, N-terminal, RNA polymerase, RNA polymerase II, RNA polymerase Rpb1, alpha subunit, clamp domain superfamily, domain 1, domain 3, domain 3 superfamily, domain 4, domain 5, domain 6, domain 7, domain 7 superfamily, eukaryotic, funnel domain superfamily, heptapeptide repeat, subunit beta-prime	GO:0003677, GO:0003899, GO:0006351, GO:0006366
AeUmb.PI554389.v2.5U.G0825400	951.941	-0.326508	0.137988	-2.36621	0.0179714	0.0487009
AeUmb.PI554389.v2.5U.G0826000	139.475	2.01065	0.346869	5.79656	6.76883e-09	7.78789e-08	Mitotic-spindle organizing protein 1	GO:0000931, GO:0033566
AeUmb.PI554389.v2.5U.G0826100	88.2164	1.11989	0.393627	2.84504	0.00444059	0.0149116
AeUmb.PI554389.v2.5U.G0826300	1106.45	-0.348574	0.105449	-3.30562	0.000947667	0.0038709	DNA methylase, Eukaryotic/archaeal PrmC-related, Methyltransferase small domain, N-6 adenine-specific, S-adenosyl-L-methionine-dependent methyltransferase superfamily, conserved site	GO:0003676, GO:0008168, GO:0008757, GO:0032259
AeUmb.PI554389.v2.5U.G0827500	18.8922	7.12285	1.27324	5.59426	2.21562e-08	2.34883e-07
AeUmb.PI554389.v2.5U.G0827800	183.088	1.18297	0.25474	4.64386	3.41965e-06	2.4614e-05	DPM1-like, Glycosyltransferase 2-like, Nucleotide-diphospho-sugar transferases	GO:0004582
AeUmb.PI554389.v2.5U.G0827900	158.246	1.11887	0.285875	3.91384	9.0838e-05	0.000483179
AeUmb.PI554389.v2.5U.G0828900	52.4074	3.4049	0.700129	4.86325	1.15476e-06	9.11556e-06	Protein kinase domain, Protein kinase-like domain superfamily, Serine-threonine/tyrosine-protein kinase, Tyrosine-protein kinase, active site, catalytic domain	GO:0004672, GO:0004713, GO:0005524, GO:0006468
AeUmb.PI554389.v2.5U.G0831300	2516.91	0.664129	0.157894	4.20618	2.5972e-05	0.000156381	Alkaline-phosphatase-like, Phosphoesterase, core domain superfamily	GO:0016788
AeUmb.PI554389.v2.5U.G0832100	703.402	-0.877842	0.172632	-5.08505	3.6752e-07	3.18047e-06	G-patch domain	GO:0003676
AeUmb.PI554389.v2.5U.G0832300	2182.39	0.555849	0.196305	2.83156	0.00463222	0.0154622	ATP binding site, Protein kinase, Protein kinase domain, Protein kinase-like domain superfamily, Serine-threonine/tyrosine-protein kinase, Serine/threonine-protein kinase, active site, catalytic domain	GO:0004672, GO:0005524, GO:0006468
AeUmb.PI554389.v2.5U.G0833100	420.119	-0.98933	0.218945	-4.51863	6.22421e-06	4.26267e-05	Ancient conserved domain protein family, CBS domain, CBS domain superfamily, CNNM, Ion transporter-like, transmembrane domain	GO:0010960
AeUmb.PI554389.v2.5U.G0833200	905.393	-0.824901	0.29537	-2.79277	0.00522591	0.0171558
AeUmb.PI554389.v2.5U.G0833300	1552.36	0.883392	0.173927	5.07909	3.79245e-07	3.27631e-06	Anthranilate phosphoribosyl transferase, Glycosyl transferase, Glycosyl transferase family 3, N-terminal domain, N-terminal domain superfamily, Nucleoside phosphorylase/phosphoribosyltransferase catalytic domain superfamily, family 3	GO:0000162, GO:0004048, GO:0016757
AeUmb.PI554389.v2.5U.G0833600	466.721	-0.549236	0.229009	-2.39832	0.0164706	0.04528
AeUmb.PI554389.v2.5U.G0834000	18.7208	5.84671	1.35219	4.32388	1.53308e-05	9.68663e-05
AeUmb.PI554389.v2.5U.G0834100	1744.31	-1.09631	0.193564	-5.66382	1.48044e-08	1.6251e-07	HMA, Heavy metal-associated domain	GO:0046872
AeUmb.PI554389.v2.5U.G0834200	60.0952	9.33924	1.23611	7.55537	4.17665e-14	1.05119e-12
AeUmb.PI554389.v2.5U.G0834500	45.1475	8.5794	1.20474	7.12138	1.06853e-12	2.21952e-11
AeUmb.PI554389.v2.5U.G0834600	12972.9	-1.05495	0.147314	-7.16124	7.99496e-13	1.68502e-11	ATP binding site, NAF domain, NAF/FISL domain, Protein kinase, Protein kinase domain, Protein kinase-like domain superfamily, Serine/threonine-protein kinase, active site	GO:0004672, GO:0005524, GO:0006468, GO:0007165
AeUmb.PI554389.v2.5U.G0835100	160.697	-1.31093	0.225403	-5.81594	6.02938e-09	6.97966e-08
AeUmb.PI554389.v2.5U.G0835500	268.795	-0.624447	0.222301	-2.80902	0.00496929	0.0164348	Forkhead-associated (FHA) domain, SMAD/FHA domain superfamily	GO:0005515
AeUmb.PI554389.v2.5U.G0836500	479.565	-0.400119	0.16741	-2.39005	0.0168459	0.0461605	Cation/H+ exchanger, K(+) efflux antiporter 4/5/6-like, Sodium/solute symporter superfamily	GO:0006812, GO:0015297, GO:0015386, GO:0016020, GO:0055085, GO:0071805, GO:1902600
AeUmb.PI554389.v2.5U.G0836600	556.251	-0.688108	0.250115	-2.75116	0.00593841	0.0191064	Proteasome maturation factor Ump1	GO:0043248
AeUmb.PI554389.v2.5U.G0836900	140.237	-1.61992	0.546734	-2.96291	0.0030475	0.0107713
AeUmb.PI554389.v2.5U.G0837000	676.454	1.26112	0.185555	6.79648	1.07204e-11	1.92495e-10
AeUmb.PI554389.v2.5U.G0837100	263.413	0.699452	0.208091	3.36128	0.000775808	0.00324708	C-terminal domain, DNA polymerase alpha/delta/epsilon, DNA polymerase delta subunit, DNA polymerase delta subunit 2, DNA polymerase delta/II small subunit family, OB-fold domain, subunit B	GO:0003677, GO:0006260
AeUmb.PI554389.v2.5U.G0838800	2218.08	-0.447977	0.167063	-2.68149	0.00732951	0.0228755	Mlo-related protein	GO:0006952, GO:0016020
AeUmb.PI554389.v2.5U.G0840000	846.205	0.970916	0.361933	2.68258	0.00730558	0.022822
AeUmb.PI554389.v2.5U.G0840700	12.8679	-3.33837	0.932172	-3.58128	0.000341918	0.00157202	D-isomer specific 2-hydroxyacid dehydrogenase, NAD(P)-binding domain superfamily, NAD-binding domain, catalytic domain	GO:0016616, GO:0051287
AeUmb.PI554389.v2.5U.G0842400	2912.41	-0.314536	0.0914909	-3.4379	0.000586249	0.00253666	Heat shock chaperonin-binding, UBA-like superfamily, Ubiquilin, Ubiquitin-associated domain, Ubiquitin-like domain, Ubiquitin-like domain superfamily	GO:0005515
AeUmb.PI554389.v2.5U.G0842800	382.146	1.66352	0.177033	9.39663	5.63402e-21	3.54497e-19	EF-Hand 1, EF-hand domain, EF-hand domain pair, calcium-binding site	GO:0005509
AeUmb.PI554389.v2.5U.G0843000	1115.15	-0.365822	0.119585	-3.05909	0.00222009	0.00816802	Thioredoxin-like superfamily, VKOR domain superfamily, Vitamin K epoxide reductase, Vitamin K epoxide reductase-like VKOR/LOT1	GO:0016491
AeUmb.PI554389.v2.5U.G0844000	15.7467	-7.14108	1.68735	-4.23213	2.31488e-05	0.00014087	DPBB domain, Expansin, Expansin/Lol pI, Expansin/pollen allergen, RlpA-like domain superfamily, RlpA-like protein, cellulose-binding-like domain, cellulose-binding-like domain superfamily, double-psi beta-barrel domain	GO:0005576
AeUmb.PI554389.v2.5U.G0844400	5552.01	-2.67465	0.277842	-9.62649	6.18034e-22	4.3714e-20	DPBB domain, Expansin, Expansin/Lol pI, Expansin/pollen allergen, RlpA-like domain superfamily, RlpA-like protein, cellulose-binding-like domain, cellulose-binding-like domain superfamily, double-psi beta-barrel domain	GO:0005576
AeUmb.PI554389.v2.5U.G0845000	5.53208	5.81468	1.73256	3.35612	0.000790448	0.00330104
AeUmb.PI554389.v2.5U.G0845600	3625.43	1.11104	0.22204	5.00376	5.62227e-07	4.71547e-06	Cytochrome b245, EF-Hand 1, EF-hand domain, EF-hand domain pair, FAD-binding 8, FAD-binding domain, Ferredoxin-NADP reductase (FNR), Ferric reductase, Ferric reductase transmembrane component-like domain, NAD binding domain, NADPH oxidase Respiratory burst, Riboflavin synthase-like beta-barrel, calcium-binding site, ferredoxin reductase-type, heavy chain, nucleotide-binding domain	GO:0004601, GO:0005509, GO:0016020, GO:0016491, GO:0050664
AeUmb.PI554389.v2.5U.G0846300	1472.2	0.469842	0.177711	2.64385	0.00819687	0.0251684	Protein kinase domain, Protein kinase-like domain superfamily, Serine-threonine/tyrosine-protein kinase, Serine/threonine-protein kinase BSK, Tetratricopeptide-like helical domain superfamily, catalytic domain	GO:0004672, GO:0005515, GO:0005524, GO:0006468, GO:0009742
AeUmb.PI554389.v2.5U.G0846600	151.691	2.65971	0.405227	6.56351	5.25561e-11	8.4656e-10	ATP binding site, Glycoside hydrolase, Lysozyme-like domain superfamily, Protein kinase, Protein kinase domain, Protein kinase-like domain superfamily, Serine/threonine-protein kinase, active site, catalytic, family 19	GO:0004568, GO:0004672, GO:0005524, GO:0006032, GO:0006468, GO:0016998
AeUmb.PI554389.v2.5U.G0847000	16.9578	3.08449	1.18743	2.59762	0.00938732	0.0282268	NAC domain, NAC domain superfamily	GO:0003677, GO:0006355
AeUmb.PI554389.v2.5U.G0847200	12.1397	6.75046	1.53401	4.40054	1.0798e-05	7.02997e-05
AeUmb.PI554389.v2.5U.G0848700	26.429	7.51727	1.26049	5.96378	2.46474e-09	3.06464e-08
AeUmb.PI554389.v2.5U.G0848800	58.4209	9.10717	1.21568	7.4914	6.8141e-14	1.66909e-12
AeUmb.PI554389.v2.5U.G0849100	1124.25	-1.43245	0.245308	-5.83938	5.23966e-09	6.13841e-08
AeUmb.PI554389.v2.5U.G0850200	176.133	-1.03653	0.392477	-2.641	0.00826616	0.0253457	Alpha/Beta hydrolase fold, Alpha/beta hydrolase fold-3	GO:0016787
AeUmb.PI554389.v2.5U.G0850300	394.57	0.77161	0.185825	4.15234	3.29095e-05	0.000193711	F-box domain, Leucine-rich repeat, Leucine-rich repeat domain superfamily, cysteine-containing subtype	GO:0005515
AeUmb.PI554389.v2.5U.G0850400	1818.32	0.636129	0.202967	3.13415	0.0017235	0.0065418	AAA+ ATPase domain, ABC transporter family G domain, ABC transporter-like, ABC-2 type transporter, ABC-transporter, ATP-binding cassette transporter, ATP-binding domain, N-terminal domain, P-loop containing nucleoside triphosphate hydrolase, PDR-like subfamily G, Plant PDR ABC transporter associated, conserved site, domain 2, transmembrane domain	GO:0005524, GO:0016020, GO:0016887, GO:0140359
AeUmb.PI554389.v2.5U.G0850500	18.5447	2.59799	0.707768	3.67068	0.000241905	0.00116172
AeUmb.PI554389.v2.5U.G0850600	29.9295	2.03309	0.705285	2.88264	0.00394354	0.0134488
AeUmb.PI554389.v2.5U.G0852800	34761	-1.86835	0.238221	-7.84296	4.40065e-15	1.2792e-13
AeUmb.PI554389.v2.5U.G0852900	35322.4	-2.20053	0.254743	-8.63824	5.70855e-18	2.4736e-16
AeUmb.PI554389.v2.5U.G0853300	416.018	-3.54582	0.364439	-9.72952	2.25647e-22	1.67857e-20
AeUmb.PI554389.v2.5U.G0855000	5697.2	-0.401065	0.164471	-2.43851	0.0147478	0.0413177
AeUmb.PI554389.v2.5U.G0855800	32.8747	7.8405	1.27147	6.16646	6.98336e-10	9.47916e-09
AeUmb.PI554389.v2.5U.G0856400	82.2002	6.97533	1.0748	6.4899	8.58924e-11	1.34063e-09
AeUmb.PI554389.v2.5U.G0856500	20.203	7.54862	1.27181	5.93533	2.93256e-09	3.61064e-08	C-terminal dimerisation domain, HAT, Ribonuclease H-like superfamily	GO:0046983
AeUmb.PI554389.v2.5U.G0856600	117.158	6.97984	0.778808	8.9622	3.18253e-19	1.65437e-17
AeUmb.PI554389.v2.5U.G0856700	81.2865	7.05592	0.872037	8.0913	5.90304e-16	1.95701e-14
AeUmb.PI554389.v2.5U.G0856800	3.02776	5.88762	2.15419	2.7331	0.00627414	0.0200435
AeUmb.PI554389.v2.5U.G0857500	44.5907	-8.55029	1.51787	-5.6331	1.76996e-08	1.91189e-07	Domain of unknown function DUF4094, Glycosyl transferase, family 31	GO:0006486, GO:0016020, GO:0016758
AeUmb.PI554389.v2.5U.G0857900	81.7276	1.50182	0.411618	3.64859	0.000263688	0.00125376	Cyclin-dependent kinase inhibitor, Cyclin-dependent kinase inhibitor domain, Cyclin-dependent kinase inhibitor domain superfamily, plant	GO:0004861, GO:0005634, GO:0045736, GO:0051726
AeUmb.PI554389.v2.5U.G0860600	14.7432	6.8832	1.39428	4.93674	7.94401e-07	6.46449e-06	C-terminal catalytic domain, NEDD8-specific protease 1/2-like, PA clan, Papain-like cysteine peptidase superfamily, Peptidase S1, Ulp1 protease family, chymotrypsin-like fold	GO:0006508, GO:0008234, GO:0019784
AeUmb.PI554389.v2.5U.G0861100	52.0575	6.0306	1.22448	4.92501	8.43551e-07	6.82479e-06
AeUmb.PI554389.v2.5U.G0861200	288.301	11.1099	1.18587	9.36856	7.35268e-21	4.54122e-19
AeUmb.PI554389.v2.5U.G0861700	5.33776	-4.51053	1.85214	-2.43531	0.0148791	0.0416399	MFS transporter superfamily, Proton-dependent oligopeptide transporter family	GO:0016020, GO:0022857, GO:0055085
AeUmb.PI554389.v2.5U.G0862000	6.09898	-5.00319	1.82736	-2.73793	0.00618264	0.0197868
AeUmb.PI554389.v2.5U.G0862300	286.49	2.1831	0.267335	8.16615	3.18393e-16	1.10276e-14
AeUmb.PI554389.v2.5U.G0862900	831.845	1.61685	0.368032	4.39323	1.11681e-05	7.25839e-05	GDSL lipase/esterase, GDSL lipase/esterase-like, SGNH hydrolase superfamily, plant	GO:0016788
AeUmb.PI554389.v2.5U.G0863000	956.665	1.53118	0.140796	10.8752	1.51355e-27	1.9619e-25	Large ribosomal subunit protein uL14, Large ribosomal subunit protein uL14 superfamily, conserved site	GO:0003735, GO:0005840, GO:0006412
AeUmb.PI554389.v2.5U.G0863200	5.615	-5.41544	2.18571	-2.47766	0.0132248	0.037695
AeUmb.PI554389.v2.5U.G0863400	1086.55	0.724597	0.177515	4.08188	4.46727e-05	0.000254711	MFS transporter superfamily, Major facilitator, Major facilitator superfamily domain, Sugar transporter, Sugar transporter ERD6/Tret1-like, Sugar/inositol transporter, conserved site, sugar transporter-like	GO:0008643, GO:0016020, GO:0022857, GO:0051119, GO:0055085
AeUmb.PI554389.v2.5U.G0863700	84.1381	-7.95116	1.06429	-7.47084	7.96843e-14	1.93148e-12	MFS transporter superfamily, Major facilitator, Major facilitator superfamily domain, Sugar transporter, Sugar transporter ERD6/Tret1-like, Sugar/inositol transporter, conserved site, sugar transporter-like	GO:0008643, GO:0016020, GO:0022857, GO:0051119, GO:0055085
AeUmb.PI554389.v2.5U.G0863800	119.85	-6.78809	0.662705	-10.243	1.27233e-24	1.23545e-22	MFS transporter superfamily, Major facilitator, Major facilitator superfamily domain, Sugar transporter, Sugar transporter ERD6/Tret1-like, Sugar/inositol transporter, conserved site, sugar transporter-like	GO:0008643, GO:0016020, GO:0022857, GO:0051119, GO:0055085
AeUmb.PI554389.v2.5U.G0864800	783.513	0.534989	0.215646	2.48087	0.0131062	0.037424	Methyltransferase type 11, S-adenosyl-L-methionine-dependent methyltransferase superfamily, SAM-dependent methyltransferase SMT-type, Sterol methyltransferase C-terminal	GO:0006694, GO:0008168, GO:0008757
AeUmb.PI554389.v2.5U.G0865200	20.414	-7.58121	1.56793	-4.83519	1.33021e-06	1.03598e-05	LSM domain superfamily, Mechanosensitive ion channel MscS, Mechanosensitive ion channel MscS-like, beta-domain superfamily, plants/fungi	GO:0016020, GO:0055085
AeUmb.PI554389.v2.5U.G0865600	58.8357	3.04668	0.678876	4.48784	7.19496e-06	4.86897e-05	Alpha/Beta hydrolase fold, Peptidase S10, serine carboxypeptidase	GO:0004185, GO:0006508
AeUmb.PI554389.v2.5U.G0865800	1304.08	1.01659	0.174283	5.83299	5.44427e-09	6.36309e-08	Alpha/Beta hydrolase fold, Peptidase S10, serine carboxypeptidase	GO:0004185, GO:0006508
AeUmb.PI554389.v2.5U.G0866200	396.337	-0.782853	0.225548	-3.47089	0.000518737	0.00227057	Zinc finger C2H2 superfamily, Zinc finger C2H2-type, Zinc finger protein JAGGED/STAMENLESS 1-like	GO:0003700
AeUmb.PI554389.v2.5U.G0866300	79.6416	-2.29626	0.474258	-4.84179	1.28673e-06	1.00392e-05	Zinc finger C2H2 superfamily, Zinc finger C2H2-type, Zinc finger protein JAGGED/STAMENLESS 1-like	GO:0003700
AeUmb.PI554389.v2.5U.G0866400	126.984	-4.53623	0.737036	-6.15469	7.5223e-10	1.01423e-08	Zinc finger C2H2 superfamily, Zinc finger C2H2-type, Zinc finger protein JAGGED/STAMENLESS 1-like	GO:0003700
AeUmb.PI554389.v2.5U.G0866500	994.788	-5.64956	0.45864	-12.3181	7.24027e-35	1.55086e-32	Zinc finger C2H2 superfamily, Zinc finger C2H2-type, Zinc finger protein JAGGED/STAMENLESS 1-like	GO:0003700
AeUmb.PI554389.v2.5U.G0867600	26.0567	1.87011	0.756795	2.47109	0.0134701	0.0382785	C-terminal, C-terminal domain superfamily, Large ribosomal subunit protein uL11, N-terminal, N-terminal domain superfamily, Ribosomal protein uL11, bacterial-type	GO:0003735, GO:0005840, GO:0006412
AeUmb.PI554389.v2.5U.G0867900	16.8946	7.22496	1.29492	5.57948	2.41241e-08	2.54576e-07	ATP binding site, Immunoglobulin-like fold, Major sperm protein (MSP) domain, PapD-like superfamily, Protein kinase, Protein kinase domain, Protein kinase-like domain superfamily, Serine/threonine-protein kinase, active site	GO:0004672, GO:0005524, GO:0006468
AeUmb.PI554389.v2.5U.G0868000	399.693	11.8848	1.1855	10.0251	1.18268e-23	1.01764e-21
AeUmb.PI554389.v2.5U.G0868200	19.0663	1.7789	0.730801	2.43417	0.0149258	0.0417436
AeUmb.PI554389.v2.5U.G0868500	704.002	-0.446059	0.138262	-3.22618	0.00125453	0.00495348
AeUmb.PI554389.v2.5U.G0868600	899.033	-0.930791	0.240877	-3.86418	0.000111464	0.000579821	AAA+ ATPase domain, ABC transporter C family, ABC transporter type 1, ABC transporter-like, ATP-binding domain, P-loop containing nucleoside triphosphate hydrolase, conserved site, six-transmembrane helical domain 1, six-transmembrane helical domain 2, transmembrane domain, transmembrane domain superfamily	GO:0005524, GO:0016020, GO:0016887, GO:0055085, GO:0140359
AeUmb.PI554389.v2.5U.G0868900	79.7139	2.42668	0.723852	3.35245	0.000801008	0.00334052
AeUmb.PI554389.v2.5U.G0869200	4603.63	-1.67257	0.393558	-4.24987	2.13897e-05	0.000131356	Glycoside hydrolase, Glycoside hydrolase superfamily, conserved site, family 14, family 14B, plant	GO:0000272, GO:0016161
AeUmb.PI554389.v2.5U.G0869800	311.367	1.17139	0.374162	3.1307	0.00174392	0.00661265	Glycoside hydrolase, Parallel beta-helix repeat, Pectin lyase fold, Pectin lyase fold/virulence factor, family 28	GO:0004650, GO:0005975
AeUmb.PI554389.v2.5U.G0869900	248.996	-1.24283	0.388743	-3.19703	0.00138849	0.00541867
AeUmb.PI554389.v2.5U.G0870000	56.7439	-2.06036	0.59357	-3.47113	0.000518272	0.00226919
AeUmb.PI554389.v2.5U.G0871300	2375.76	-0.409299	0.137336	-2.98027	0.0028799	0.0102535	Malectin-like domain, Receptor-like protein kinase FERONIA-like	GO:0004672
AeUmb.PI554389.v2.5U.G0871400	82.3339	9.17051	1.20828	7.5897	3.20636e-14	8.21361e-13	F-box domain, F-box-like domain superfamily, FBD domain, Leucine-rich repeat domain superfamily	GO:0005515
AeUmb.PI554389.v2.5U.G0871500	1389.94	1.29794	0.190686	6.80667	9.98826e-12	1.80206e-10	ATP binding site, Malectin-like domain, Protein kinase, Protein kinase domain, Protein kinase-like domain superfamily, Receptor-like protein kinase ANXUR1-like, Serine-threonine/tyrosine-protein kinase, Serine/threonine-protein kinase, active site, catalytic domain	GO:0004672, GO:0004714, GO:0005524, GO:0006468
AeUmb.PI554389.v2.5U.G0872700	211.392	0.681599	0.202669	3.36312	0.00077066	0.00322912	Nucleotide-binding alpha-beta plait domain superfamily, PHIP1, RNA recognition motif 1, RNA recognition motif domain, RNA-binding domain superfamily	GO:0003676, GO:0003723
AeUmb.PI554389.v2.5U.G0873200	81.8739	-4.26331	0.690257	-6.17641	6.55773e-10	8.94969e-09	K-box, MADS MEF2-like, MADS-box, MADS-box superfamily, Transcription factor	GO:0000977, GO:0003677, GO:0003700, GO:0005634, GO:0006355, GO:0045944, GO:0046983
AeUmb.PI554389.v2.5U.G0873300	1690.67	1.53615	0.629582	2.43996	0.014689	0.0411805
AeUmb.PI554389.v2.5U.G0873900	432.493	-1.03506	0.196703	-5.26206	1.42453e-07	1.32584e-06	ATP binding site, Protein kinase, Protein kinase domain, Protein kinase-like domain superfamily, Serine/threonine-protein kinase, Serine/threonine-protein kinase Atg1-like, active site	GO:0004672, GO:0004674, GO:0005524, GO:0006468, GO:0006914
AeUmb.PI554389.v2.5U.G0874000	1939.53	-0.772317	0.202861	-3.80712	0.000140593	0.000715567	ATP-binding domain, C-terminal, Dicer dimerisation domain, Dicer dimerisation domain superfamily, Double-stranded RNA-binding domain, Helicase, Helicase superfamily 1/2, Helicase/UvrB, N-terminal, P-loop containing nucleoside triphosphate hydrolase, PAZ domain, PAZ domain superfamily, Ribonuclease III, Ribonuclease III domain, endonuclease domain superfamily	GO:0003677, GO:0003723, GO:0004525, GO:0005515, GO:0005524, GO:0006364, GO:0006396, GO:0016787, GO:0016891
AeUmb.PI554389.v2.5U.G0876100	29526.9	1.00688	0.278729	3.61238	0.000303396	0.00141713	ApaH type, Calcineurin-like phosphoesterase domain, Fn3-like domain, Iron/zinc purple acid phosphatase-like C-terminal domain, Metallo-dependent phosphatase-like, N-terminal, Purple acid phosphatase, Purple acid phosphatase-like, metallophosphatase domain	GO:0003993, GO:0016787, GO:0046872
AeUmb.PI554389.v2.5U.G0876500	4571.56	1.21286	0.132009	9.1877	4.01328e-20	2.27409e-18
AeUmb.PI554389.v2.5U.G0876600	5.44986	6.8001	1.70248	3.99424	6.49033e-05	0.000355884
AeUmb.PI554389.v2.5U.G0876700	30.5257	5.34722	0.884494	6.04551	1.48934e-09	1.92556e-08	GDSL lipase/esterase, SGNH hydrolase superfamily	GO:0016788
AeUmb.PI554389.v2.5U.G0877200	230.748	1.65646	0.334475	4.95241	7.32985e-07	6.00587e-06
AeUmb.PI554389.v2.5U.G0877300	10425.9	1.50622	0.272986	5.51759	3.43678e-08	3.53776e-07	Aquaporin transporter, Aquaporin-like, Major intrinsic protein, conserved site	GO:0015267, GO:0016020, GO:0055085
AeUmb.PI554389.v2.5U.G0877400	37.4622	-6.6731	1.49045	-4.47722	7.56201e-06	5.08093e-05
AeUmb.PI554389.v2.5U.G0877900	101.731	0.972392	0.327349	2.97051	0.00297306	0.0105477	Amino acid/polyamine transporter I, Polyamine transporter RMV1-like	GO:0016020, GO:0022857, GO:0055085
AeUmb.PI554389.v2.5U.G0881000	781.983	-0.881521	0.325084	-2.71167	0.00669453	0.0211715	Asp-active site, Cucumisin-like catalytic domain, PA domain, Peptidase S8, Peptidase S8 propeptide/proteinase inhibitor I9, Peptidase S8 propeptide/proteinase inhibitor I9 superfamily, Peptidase S8/S53 domain, Peptidase S8/S53 domain superfamily, Subtilisin-like protease, fibronectin type-III domain, subtilisin, subtilisin-related	GO:0004252, GO:0006508, GO:0008236
AeUmb.PI554389.v2.5U.G0881600	99.9936	9.67236	1.20919	7.99902	1.25412e-15	3.97033e-14
AeUmb.PI554389.v2.5U.G0882100	1407.49	-1.97349	0.210347	-9.38203	6.47138e-21	4.02987e-19	Aromatic amino acid beta-eliminating lyase/threonine aldolase, Low specificity L-threonine aldolase-like, Pyridoxal phosphate-dependent transferase, major domain, small domain	GO:0006520, GO:0016829
AeUmb.PI554389.v2.5U.G0882300	51.3217	8.59994	1.21974	7.05064	1.78095e-12	3.58349e-11
AeUmb.PI554389.v2.5U.G0882400	83.5584	4.40472	0.491848	8.95545	3.38345e-19	1.7438e-17
AeUmb.PI554389.v2.5U.G0882500	931.069	0.684216	0.236295	2.8956	0.00378435	0.0129718	Fe(2+) 2OG dioxygenase domain, Oxoglutarate/iron-dependent dioxygenase, Prolyl 4-hydroxylase, Prolyl 4-hydroxylase alpha subunit, alpha subunit	GO:0005506, GO:0016705, GO:0031418
AeUmb.PI554389.v2.5U.G0882800	67.3256	-9.84188	1.58478	-6.21026	5.28964e-10	7.32162e-09	C-terminal, FAD/NAD(P)-binding domain superfamily, Glucose-methanol-choline oxidoreductase, N-terminal	GO:0016614, GO:0050660
AeUmb.PI554389.v2.5U.G0883100	967.671	-0.378273	0.136244	-2.77643	0.00549594	0.0178983	Per1-like	GO:0006506
AeUmb.PI554389.v2.5U.G0883500	398.684	-1.24384	0.515567	-2.41256	0.0158409	0.0438	Flowering-promoting factor 1	GO:0009909
AeUmb.PI554389.v2.5U.G0884300	1631.24	0.420851	0.150992	2.78724	0.00531592	0.0174058
AeUmb.PI554389.v2.5U.G0884600	31.0368	3.5404	0.556767	6.35885	2.03264e-10	2.99901e-09
AeUmb.PI554389.v2.5U.G0886000	1069.31	-0.866004	0.113493	-7.63046	2.33924e-14	6.14345e-13	APOBEC/CMP deaminase, Cytidine and deoxycytidylate deaminase domain, Cytidine deaminase-like, Dihydrofolate reductase-like domain superfamily, Riboflavin biosynthesis protein RibD, zinc-binding	GO:0003824, GO:0008270, GO:0008835, GO:0009231, GO:0016787
AeUmb.PI554389.v2.5U.G0886400	193.148	3.26137	0.303194	10.7567	5.50847e-27	6.7355e-25	Dihydrodipicolinate reductase, N-terminal, NAD(P)-binding domain superfamily	GO:0008839, GO:0009089
AeUmb.PI554389.v2.5U.G0886700	404.248	-0.583744	0.201908	-2.89114	0.00383842	0.0131333	26S proteasome regulatory subunit Rpn6, 6S proteasome subunit Rpn6, C-terminal helix domain, N-terminal, Proteasome component (PCI) domain, Tetratricopeptide-like helical domain superfamily, Winged helix DNA-binding domain superfamily	GO:0005515
AeUmb.PI554389.v2.5U.G0886900	3.7787	6.15667	1.71232	3.59551	0.000323758	0.00149903
AeUmb.PI554389.v2.5U.G0887000	17.2638	7.71205	1.26617	6.09086	1.12304e-09	1.47727e-08
AeUmb.PI554389.v2.5U.G0887100	42.7263	2.35812	0.523804	4.50192	6.73408e-06	4.58482e-05
AeUmb.PI554389.v2.5U.G0887400	45.6755	3.93536	0.767315	5.12874	2.91686e-07	2.56836e-06	Aldolase-type TIM barrel, N-terminal, NADH:flavin oxidoreductase/NADH oxidase, Oxidoreductase Oye-like	GO:0010181, GO:0016491
AeUmb.PI554389.v2.5U.G0887600	4.41538	-4.99277	1.7099	-2.91991	0.00350127	0.0121407	Aquaporin transporter, Aquaporin-like, Major intrinsic protein, conserved site	GO:0015267, GO:0016020, GO:0055085
AeUmb.PI554389.v2.5U.G0887700	1090.84	-0.991274	0.389217	-2.54684	0.0108702	0.0319909	F-box-like domain superfamily, Phloem protein 2-like	GO:0005515
AeUmb.PI554389.v2.5U.G0888000	1938.75	1.43427	0.388993	3.68714	0.000226786	0.00109731	Peptidase S54, Rhomboid-like superfamily, rhomboid, rhomboid domain	GO:0004252, GO:0006508, GO:0016020
AeUmb.PI554389.v2.5U.G0889300	2604.52	0.691992	0.166203	4.16352	3.13375e-05	0.000185252
AeUmb.PI554389.v2.5U.G0890000	54.0642	1.79488	0.507984	3.53334	0.000410346	0.00184974	Aldolase-type TIM barrel, KDPG/KHG aldolase	GO:0016829
AeUmb.PI554389.v2.5U.G0890300	146.495	2.30393	0.786185	2.93052	0.003384	0.0117895	Alpha/Beta hydrolase fold, Palmitoyl protein thioesterase	GO:0098599
AeUmb.PI554389.v2.5U.G0890900	207.794	-5.2733	0.5191	-10.1585	3.03581e-24	2.83862e-22
AeUmb.PI554389.v2.5U.G0891100	34.261	-8.91864	1.5204	-5.86598	4.46476e-09	5.30467e-08
AeUmb.PI554389.v2.5U.G0891200	450.623	-1.07836	0.31656	-3.40651	0.000657992	0.00281045
AeUmb.PI554389.v2.5U.G0892000	5.04063	5.77098	2.22463	2.59413	0.00948298	0.0284838
AeUmb.PI554389.v2.5U.G0892300	31.4935	3.40585	0.951581	3.57915	0.000344713	0.00158367	Ankyrin repeat, Ankyrin repeat-containing domain superfamily, PGG domain	GO:0005515
AeUmb.PI554389.v2.5U.G0892400	27.085	3.42439	1.2816	2.67197	0.00754071	0.0234466	AAA+ ATPase domain, AAA-type, AAA-type ATPase, ATPase, N-terminal domain, P-loop containing nucleoside triphosphate hydrolase, conserved site, core	GO:0005524, GO:0016887
AeUmb.PI554389.v2.5U.G0893100	201.703	0.608124	0.202935	2.99664	0.0027297	0.00978082	Alr4036 family, FMN-binding domain, FMN-binding split barrel, Pyridoxamine 5'-phosphate oxidase, probable FMN-dependent	GO:0004733, GO:0008615, GO:0010181
AeUmb.PI554389.v2.5U.G0893300	732.523	-0.506405	0.212021	-2.38847	0.0169187	0.0463222	G-protein beta WD-40 repeat, WD repeat-containing protein WDR44/Dgr2, WD40 repeat, WD40-repeat-containing domain superfamily, WD40/YVTN repeat-like-containing domain superfamily	GO:0005515
AeUmb.PI554389.v2.5U.G0893900	181.389	0.856526	0.349032	2.454	0.0141275	0.0398617	Pentatricopeptide repeat, Tetratricopeptide-like helical domain superfamily	GO:0005515
AeUmb.PI554389.v2.5U.G0894000	25.333	3.8528	0.918503	4.19466	2.73287e-05	0.000163539	BTB/POZ and MATH domain-containing protein 1-6, BTB/POZ domain, MATH/TRAF domain, SKP1/BTB/POZ domain superfamily, TRAF-like	GO:0005515, GO:0016567
AeUmb.PI554389.v2.5U.G0894200	1045.54	-0.301211	0.125381	-2.40236	0.0162895	0.04486	C-terminal domain superfamily, GHMP kinase, GHMP kinase N-terminal domain, L-fucokinase, Ribosomal protein uS5 domain 2-type superfamily	GO:0005524, GO:0016772
AeUmb.PI554389.v2.5U.G0894700	3103.45	-0.364789	0.149298	-2.44336	0.014551	0.0408467	AMP-activated protein kinase, Dual specificity phosphatase, Dual specificity protein phosphatase domain, Immunoglobulin E-set, Immunoglobulin-like fold, Laforin-like, Protein-tyrosine phosphatase-like, Tyrosine-specific protein phosphatases domain, catalytic domain, dual specificity phosphatase domain, glycogen-binding domain	GO:0006470, GO:0008138, GO:0016311, GO:0016791, GO:0019203
AeUmb.PI554389.v2.5U.G0894800	574.268	1.15047	0.424741	2.70864	0.00675588	0.021332
AeUmb.PI554389.v2.5U.G0895800	572.355	0.685867	0.209401	3.27538	0.00105521	0.00425325	LSM domain superfamily, Sm domain, Small nuclear ribonucleoprotein Sm D2, eukaryotic/archaea-type	GO:0003723, GO:0008380, GO:0030532
AeUmb.PI554389.v2.5U.G0896600	195.498	1.04112	0.395536	2.63219	0.00848366	0.0259073	Aminotransferase, Aminotransferase class IV, Aminotransferase-like, Branched-chain amino acid aminotransferase II, Branched-chain aminotransferase, Branched-chain-amino-acid aminotransferase-like, C-terminal, N-terminal, PLP-dependent enzymes, class IV, conserved site	GO:0003824, GO:0004084, GO:0009081
AeUmb.PI554389.v2.5U.G0897700	204.676	-1.39269	0.584775	-2.38159	0.017238	0.0470418	Acid phosphatase, HAD superfamily, HAD-like superfamily, Vegetative storage protein/acid phosphatase, class B-like, plant	GO:0003993
AeUmb.PI554389.v2.5U.G0897900	29.7162	-6.32986	1.49269	-4.24058	2.22945e-05	0.000136247
AeUmb.PI554389.v2.5U.G0898000	24.1491	-7.79022	1.70338	-4.57339	4.79903e-06	3.36444e-05	Acid phosphatase, HAD superfamily, HAD-like superfamily, Vegetative storage protein/acid phosphatase, class B-like, plant	GO:0003993
AeUmb.PI554389.v2.5U.G0898200	1539.35	-0.615102	0.237708	-2.58764	0.00966371	0.0289662	Mediator complex, subunit Med12	GO:0003712, GO:0006357, GO:0016592
AeUmb.PI554389.v2.5U.G0898300	2345.33	-0.672521	0.125444	-5.36111	8.27131e-08	7.98881e-07	Bestrophin-like, Voltage-dependent anion channel-forming protein YneE/VCCN1/2-like, Voltage-dependent chloride channel 1/2	GO:0005247, GO:0005254, GO:0042548
AeUmb.PI554389.v2.5U.G0899400	114.08	2.26607	0.487484	4.64851	3.3434e-06	2.41342e-05
AeUmb.PI554389.v2.5U.G0900000	2965.44	-1.91602	0.226324	-8.46583	2.54331e-17	1.01203e-15	Helix-loop-helix DNA-binding domain superfamily, Myc-type, Transcription factor AIB/MYC-like, basic helix-loop-helix (bHLH) domain	GO:0003700, GO:0006355, GO:0046983
AeUmb.PI554389.v2.5U.G0900100	7440.49	-0.442816	0.183083	-2.41866	0.0155776	0.0432461	Helix-loop-helix DNA-binding domain superfamily, Myc-type, basic helix-loop-helix (bHLH) domain	GO:0046983
AeUmb.PI554389.v2.5U.G0900700	1563.5	-1.67127	0.287876	-5.80552	6.41659e-09	7.40803e-08	Helix-loop-helix DNA-binding domain superfamily, Myc-type, Transcription factor AIB/MYC-like, basic helix-loop-helix (bHLH) domain	GO:0003700, GO:0006355, GO:0046983
AeUmb.PI554389.v2.5U.G0902300	6.92574	6.5812	1.5059	4.37028	1.24088e-05	7.99081e-05	C-terminal, DNA clamp superfamily, N-terminal, PCNA, Proliferating cell nuclear antigen	GO:0003677, GO:0006275, GO:0030337
AeUmb.PI554389.v2.5U.G0902500	35.2179	8.95885	1.23731	7.24057	4.46788e-13	9.69389e-12	C-terminal, DNA clamp superfamily, N-terminal, PCNA, Proliferating cell nuclear antigen	GO:0003677, GO:0006275, GO:0030337
AeUmb.PI554389.v2.5U.G0902900	183.321	5.09598	1.21091	4.2084	2.57184e-05	0.000155039	2-layer sandwich domain, Beta tubulin, C-terminal, C-terminal domain, GTPase domain, GTPase domain superfamily, Tubulin, Tubulin/FtsZ, Tubulin/FtsZ-like, autoregulation binding site, conserved site	GO:0003924, GO:0005200, GO:0005525, GO:0005874, GO:0007017
AeUmb.PI554389.v2.5U.G0904600	75.4865	4.1397	1.52593	2.71289	0.00666984	0.0211178
AeUmb.PI554389.v2.5U.G0905200	507.826	11.812	1.56773	7.53448	4.90296e-14	1.2238e-12
AeUmb.PI554389.v2.5U.G0906100	97.5453	-9.71081	1.50225	-6.46419	1.01841e-10	1.57329e-09	C-terminal domain, D-arabinono-1,4-lactone oxidase, FAD linked oxidase, FAD-binding, FAD-binding domain, L-gulonolactone oxidase, N-terminal, PCMH-type, plant, subdomain 1, subdomain 2, type PCMH, type PCMH-like superfamily	GO:0003885, GO:0016020, GO:0050660, GO:0071949
AeUmb.PI554389.v2.5U.G0906200	191.277	10.0018	1.19722	8.35416	6.58998e-17	2.50038e-15
AeUmb.PI554389.v2.5U.G0906600	292.435	4.75589	0.333257	14.2709	3.32045e-46	1.22298e-43
AeUmb.PI554389.v2.5U.G0906800	1087.01	2.0132	0.211511	9.51818	1.76236e-21	1.1724e-19
AeUmb.PI554389.v2.5U.G0909400	896.811	9.16223	0.533629	17.1696	4.48193e-66	4.51211e-63	Zinc finger C2H2 superfamily, Zinc finger C2H2-type, Zinc finger protein JAGGED/STAMENLESS 1-like	GO:0003700
AeUmb.PI554389.v2.5U.G0909500	83.145	5.60807	0.972011	5.76956	7.94802e-09	9.0789e-08	Zinc finger C2H2 superfamily, Zinc finger C2H2-type, Zinc finger protein JAGGED/STAMENLESS 1-like	GO:0003700
AeUmb.PI554389.v2.5U.G0909700	269.386	-0.823585	0.261751	-3.14644	0.0016527	0.00630552	Oxysterol-binding protein, Oxysterol-binding protein superfamily, PH-like domain superfamily, Pleckstrin homology domain	GO:0008289
AeUmb.PI554389.v2.5U.G0911000	149.196	4.2293	0.665009	6.35977	2.02057e-10	2.98267e-09	Class I-like SAM-dependent O-methyltransferase, S-adenosyl-L-methionine-dependent methyltransferase superfamily	GO:0008171, GO:0008757
AeUmb.PI554389.v2.5U.G0912700	227.571	1.33625	0.378441	3.53093	0.000414103	0.00186445
AeUmb.PI554389.v2.5U.G0912800	299.554	-1.9266	0.327142	-5.88918	3.88123e-09	4.66829e-08
AeUmb.PI554389.v2.5U.G0912900	1084.93	-2.04487	0.22079	-9.26162	2.01358e-20	1.1901e-18
AeUmb.PI554389.v2.5U.G0913000	713.283	0.854957	0.240601	3.55342	0.000380256	0.00172647
AeUmb.PI554389.v2.5U.G0913400	90.1623	1.46632	0.408175	3.59238	0.000327672	0.00151274
AeUmb.PI554389.v2.5U.G0913500	252.662	-1.01657	0.245885	-4.13433	3.55984e-05	0.000207717	ACT domain, ACT-like domain, Formyl transferase, Formyltetrahydrofolate deformylase, N-terminal, N-terminal domain superfamily	GO:0006189, GO:0008864, GO:0009058
AeUmb.PI554389.v2.5U.G0914100	141.809	0.923317	0.238651	3.86891	0.000109325	0.00056997
AeUmb.PI554389.v2.5U.G0914600	23.1354	-8.39837	1.60759	-5.22418	1.74925e-07	1.60678e-06	F-box-like domain superfamily	GO:0005515
AeUmb.PI554389.v2.5U.G0915200	84.657	1.51202	0.421674	3.58576	0.000336096	0.00154761	CCT domain, Zinc finger protein CONSTANS-like	GO:0005515, GO:0009909
AeUmb.PI554389.v2.5U.G0916900	47.5857	-8.51146	1.51116	-5.63242	1.77698e-08	1.91878e-07	Aspartic peptidase, Aspartic peptidase A1 family, Aspartic peptidase domain superfamily, C-terminal, N-terminal, Peptidase family A1 domain, Xylanase inhibitor, active site	GO:0004190, GO:0006508
AeUmb.PI554389.v2.5U.G0917000	59.667	-9.18034	1.46029	-6.28663	3.24422e-10	4.65915e-09	Aspartic peptidase A1 family, Aspartic peptidase domain superfamily, C-terminal, N-terminal, Peptidase family A1 domain, Xylanase inhibitor	GO:0004190, GO:0006508
AeUmb.PI554389.v2.5U.G0917100	12.0952	-6.92784	1.58203	-4.37909	1.19174e-05	7.70235e-05
AeUmb.PI554389.v2.5U.G0917200	247.464	-0.582103	0.211077	-2.75778	0.0058195	0.0187778
AeUmb.PI554389.v2.5U.G0917300	78.9148	-6.67122	0.864129	-7.72016	1.1618e-14	3.168e-13	Leucine-rich repeat, Leucine-rich repeat domain superfamily, typical subtype	GO:0005515
AeUmb.PI554389.v2.5U.G0917500	1502.77	-0.592469	0.160384	-3.69407	0.000220692	0.00107263	Alcohol dehydrogenase-like, C-terminal, GroES-like superfamily, N-terminal, NAD(P)-binding domain superfamily, Polyketide synthase, Quinone oxidoreductase-like, enoylreductase domain	GO:0003960, GO:0016491
AeUmb.PI554389.v2.5U.G0919100	79.5037	-9.67485	1.55454	-6.2236	4.85888e-10	6.77194e-09
AeUmb.PI554389.v2.5U.G0920300	282.441	-1.18346	0.248676	-4.75906	1.94495e-06	1.47295e-05	A domain superfamily, Cation-transporting P-type ATPase, HAD superfamily, HAD-like superfamily, N-terminal, P-type ATPase, cytoplasmic domain N, haloacid dehalogenase domain, phosphorylation site, subfamily IIIA, transmembrane domain superfamily	GO:0000166, GO:0005215, GO:0005524, GO:0008553, GO:0016020, GO:0016887, GO:0120029
AeUmb.PI554389.v2.5U.G0921000	16.0013	7.34895	1.32754	5.53578	3.09849e-08	3.21583e-07
AeUmb.PI554389.v2.5U.G0922400	11.431	6.02559	1.49897	4.01984	5.82388e-05	0.000322989	Cupin 1, Germin, RmlC-like cupin domain superfamily, RmlC-like jelly roll fold, manganese binding site	GO:0030145
AeUmb.PI554389.v2.5U.G0922600	4.78789	5.77103	2.02596	2.84854	0.00439199	0.0147796	Cupin 1, Germin, RmlC-like cupin domain superfamily, RmlC-like jelly roll fold, manganese binding site	GO:0030145
AeUmb.PI554389.v2.5U.G0925300	446.36	0.461463	0.185986	2.48117	0.0130953	0.0374035	DNA repair endonuclease XPF, ERCC4 domain, Restriction endonuclease type II-like, RuvA domain 2-like, nuclease domain	GO:0003677, GO:0004518
AeUmb.PI554389.v2.5U.G0926600	999.235	0.730228	0.183572	3.97788	6.95333e-05	0.000378796	N-terminal domain, Phosphoribosyltransferase domain, Phosphoribosyltransferase-like, Ribose-phosphate pyrophosphokinase, bacterial-type	GO:0000287, GO:0004749, GO:0009165
AeUmb.PI554389.v2.5U.G0927500	151.922	3.50531	0.385269	9.09836	9.17044e-20	5.06336e-18	E3 ubiquitin-protein ligase RFWD3, RING-type, RING/FYVE/PHD-type, Zinc finger, eukaryotic	GO:0004842, GO:0005634, GO:0016567, GO:0036297
AeUmb.PI554389.v2.5U.G0928200	68.5835	-7.40993	1.05466	-7.02592	2.12654e-12	4.23094e-11	AAA-type, ATPase, C-terminal, Clp ATPase, ClpA/B, ClpA/B family, P-loop containing nucleoside triphosphate hydrolase, conserved site 2, core	GO:0005524, GO:0016887
AeUmb.PI554389.v2.5U.G0928300	35.6406	4.96143	1.18085	4.20159	2.6505e-05	0.000159209	NRAMP family	GO:0016020, GO:0030001, GO:0046873
AeUmb.PI554389.v2.5U.G0928500	6.30489	-6.8252	1.83617	-3.71709	0.000201531	0.000987859
AeUmb.PI554389.v2.5U.G0928600	15.2725	-7.54831	1.69577	-4.45125	8.53724e-06	5.67433e-05
AeUmb.PI554389.v2.5U.G0928700	25.7514	-7.20113	1.56201	-4.61016	4.02367e-06	2.85399e-05
AeUmb.PI554389.v2.5U.G0929300	28.6513	3.21128	0.771381	4.16303	3.14049e-05	0.000185578	Nucleoside phosphatase GDA1/CD39	GO:0016787
AeUmb.PI554389.v2.5U.G0930000	46.0959	3.91041	0.779089	5.01921	5.1884e-07	4.37587e-06
AeUmb.PI554389.v2.5U.G0931500	246.806	3.13832	0.797904	3.93321	8.38184e-05	0.000448685	Bifunctional inhibitor/plant lipid transfer protein/seed storage helical domain, Bifunctional inhibitor/plant lipid transfer protein/seed storage helical domain superfamily, Plant non-specific lipid-transfer protein/Par allergen	GO:0006869, GO:0008289
AeUmb.PI554389.v2.5U.G0931700	43.2175	3.964	1.47084	2.69506	0.00703768	0.0220948	B-class, Cytochrome P450, Cytochrome P450 superfamily, E-class, conserved site, group I	GO:0004497, GO:0005506, GO:0016705, GO:0020037
AeUmb.PI554389.v2.5U.G0932700	4187.6	-1.76614	0.348496	-5.06789	4.02245e-07	3.44935e-06	Peptidase C14, caspase domain	GO:0004197, GO:0006508
AeUmb.PI554389.v2.5U.G0934300	3887.03	-1.73223	0.324097	-5.3448	9.05193e-08	8.69273e-07	Peptidase C14, caspase domain	GO:0004197, GO:0006508
AeUmb.PI554389.v2.5U.G0934800	1501.22	0.686401	0.236202	2.90599	0.00366092	0.0126002	ATP-binding domain, C-terminal, DEAD-box type, DEAD/DEAH box helicase domain, Helicase, Helicase superfamily 1/2, P-loop containing nucleoside triphosphate hydrolase, Q motif, RNA helicase	GO:0003676, GO:0003724, GO:0005524
AeUmb.PI554389.v2.5U.G0936300	20.6027	-2.67444	0.879759	-3.03997	0.002366	0.00862811
AeUmb.PI554389.v2.5U.G0936800	385.026	3.27548	0.368767	8.88225	6.55205e-19	3.22288e-17
AeUmb.PI554389.v2.5U.G0937000	20.4234	-5.63175	2.25244	-2.50029	0.0124092	0.0357447	DNA-binding, Heat shock factor (HSF)-type, Heat shock transcription factor family, Winged helix DNA-binding domain superfamily, Winged helix-like DNA-binding domain superfamily	GO:0003700, GO:0006355, GO:0043565
AeUmb.PI554389.v2.5U.G0937800	2621.59	1.17887	0.164056	7.18574	6.68419e-13	1.42266e-11
AeUmb.PI554389.v2.5U.G0938100	5300.98	-0.764396	0.178621	-4.27943	1.87373e-05	0.000116297
AeUmb.PI554389.v2.5U.G0938800	13.4211	3.28641	1.35851	2.41913	0.0155577	0.0432067
AeUmb.PI554389.v2.5U.G0939100	12.9563	3.55815	1.14206	3.11556	0.00183598	0.00690882
AeUmb.PI554389.v2.5U.G0939200	145.898	5.02219	0.593158	8.46686	2.521e-17	1.00448e-15
AeUmb.PI554389.v2.5U.G0939600	44.448	2.80069	0.433859	6.4553	1.08007e-10	1.65838e-09
AeUmb.PI554389.v2.5U.G0939700	21.5879	7.46806	1.32396	5.64072	1.69342e-08	1.83445e-07
AeUmb.PI554389.v2.5U.G0939800	28.3572	-1.955	0.508597	-3.84391	0.000121091	0.000625266
AeUmb.PI554389.v2.5U.G0941400	29.4769	9.14204	1.70454	5.36336	8.16882e-08	7.90177e-07	Nicotianamine synthase, S-adenosyl-L-methionine-dependent methyltransferase superfamily	GO:0008757, GO:0030410, GO:0030418
AeUmb.PI554389.v2.5U.G0944700	5.90985	-6.7141	1.98848	-3.3765	0.000734142	0.00309759	C-terminal, DNA polymerase III, P-loop containing nucleoside triphosphate hydrolase, clamp loader complex, gamma/delta/delta subunit	GO:0003677, GO:0006260
AeUmb.PI554389.v2.5U.G0945700	117.659	3.17884	0.360179	8.82573	1.08747e-18	5.15601e-17	WD40 repeat, WD40-repeat-containing domain superfamily, WD40/YVTN repeat-like-containing domain superfamily	GO:0005515
AeUmb.PI554389.v2.5U.G0946100	16.9373	-3.54934	1.07142	-3.31275	0.000923828	0.00378395	C-terminal catalytic domain, Papain-like cysteine peptidase superfamily, Ulp1 protease family	GO:0006508, GO:0008234
AeUmb.PI554389.v2.5U.G0946600	235.708	-6.3185	0.601016	-10.513	7.52384e-26	8.41611e-24
AeUmb.PI554389.v2.5U.G0946900	177.188	0.730978	0.268236	2.72512	0.00642773	0.0204757
AeUmb.PI554389.v2.5U.G0947500	112.649	8.44994	1.04785	8.06405	7.3809e-16	2.41514e-14	Ubiquitin domain, Ubiquitin-like domain, Ubiquitin-like domain superfamily	GO:0005515
AeUmb.PI554389.v2.5U.G0949400	1446.82	1.06322	0.167173	6.36	2.01754e-10	2.9811e-09	C-terminal domain superfamily, Folylpolyglutamate synthase, Folylpolyglutamate synthetase, Mur ligase, Mur-like, catalytic domain superfamily, conserved site, eukaryota	GO:0004326, GO:0005524, GO:0009058, GO:0009396, GO:0016881
AeUmb.PI554389.v2.5U.G0951900	34.6572	-8.09305	1.49539	-5.412	6.23244e-08	6.17154e-07
AeUmb.PI554389.v2.5U.G0952300	19.7418	-7.32658	1.54251	-4.74979	2.0363e-06	1.53482e-05
AeUmb.PI554389.v2.5U.G0953300	51.8827	-8.40505	1.48442	-5.66216	1.49481e-08	1.63989e-07
AeUmb.PI554389.v2.5U.G0953500	49.2202	-8.36717	1.47883	-5.65798	1.53167e-08	1.67546e-07
AeUmb.PI554389.v2.5U.G0953600	493.064	-0.678901	0.28594	-2.37428	0.0175832	0.0478164
AeUmb.PI554389.v2.5U.G0954400	122.434	-2.93189	0.55275	-5.30418	1.13178e-07	1.07053e-06
AeUmb.PI554389.v2.5U.G0954600	146.376	-1.06818	0.337631	-3.16375	0.00155751	0.00598854	Cytochrome P450, Cytochrome P450 superfamily	GO:0004497, GO:0005506, GO:0016705, GO:0020037
AeUmb.PI554389.v2.5U.G0954700	132.465	-1.41353	0.39095	-3.61564	0.000299612	0.00140195	Cytochrome P450, Cytochrome P450 superfamily, E-class, conserved site, group I	GO:0004497, GO:0005506, GO:0016705, GO:0020037
AeUmb.PI554389.v2.5U.G0954800	6.87973	-5.5422	1.734	-3.19619	0.00139253	0.00543025
AeUmb.PI554389.v2.5U.G0956000	840.792	-0.912536	0.375252	-2.4318	0.0150241	0.0419564	ATP binding site, Protein kinase, Protein kinase domain, Protein kinase-like domain superfamily, Serine/threonine-protein kinase, active site	GO:0004672, GO:0005524, GO:0006468
AeUmb.PI554389.v2.5U.G0960000	215.319	-1.4856	0.389634	-3.8128	0.000137399	0.000701205	ATPase, C-terminal domain superfamily, Chaperone DnaK, Heat shock protein 70, Heat shock protein 70 family, Heat shock protein 70kD, conserved site, nucleotide binding domain, peptide-binding domain superfamily	GO:0005524, GO:0006457, GO:0051082, GO:0140662
AeUmb.PI554389.v2.5U.G0960400	2195.57	-1.06295	0.174542	-6.08995	1.12943e-09	1.48438e-08	Tetratricopeptide-like helical domain superfamily	GO:0005515
AeUmb.PI554389.v2.5U.G0960600	119.93	2.91881	0.607291	4.80628	1.53767e-06	1.1829e-05
AeUmb.PI554389.v2.5U.G0961300	6417.4	-0.669124	0.184193	-3.63273	0.000280442	0.00132239	Alanine-tRNA ligase, Alanyl-tRNA synthetase, Class II Aminoacyl-tRNA synthetase/Biotinyl protein ligase (BPL) and lipoyl protein ligase (LPL), DHHA1 domain, N-terminal, SAD, Threonyl/alanyl tRNA synthetase, Translation protein, anti-codon-binding domain superfamily, beta-barrel domain superfamily, class II-like, class IIc, core domain, eukaryota/bacteria, putative editing domain superfamily	GO:0000166, GO:0003676, GO:0004812, GO:0004813, GO:0005524, GO:0005737, GO:0006419, GO:0043039
AeUmb.PI554389.v2.3U.G0000700	1791.88	-0.779557	0.244641	-3.18654	0.00143987	0.00558669	CCHC-type, Homeobox-like domain superfamily, Myb domain, SANT domain, SANT/Myb domain, Zinc finger, plants	GO:0003676, GO:0003677, GO:0008270
AeUmb.PI554389.v2.3U.G0002100	1129.04	-1.43908	0.301985	-4.76539	1.88487e-06	1.43104e-05	AUX/IAA domain, AUX/IAA protein, PB1 domain	GO:0005515, GO:0005634, GO:0006355
AeUmb.PI554389.v2.3U.G0002200	129.034	1.72799	0.393104	4.39576	1.10384e-05	7.17875e-05	ATPase, C-terminal, Hexokinase, N-terminal, nucleotide binding domain	GO:0001678, GO:0004396, GO:0005524, GO:0005536, GO:0005975, GO:0016773
AeUmb.PI554389.v2.3U.G0002800	13107.5	-1.23387	0.17232	-7.16035	8.04695e-13	1.69362e-11	Aminoacid dehydrogenase-like, Malic enzyme, Malic oxidoreductase, N-terminal domain, N-terminal domain superfamily, NAD(P)-binding domain superfamily, NAD-binding, conserved site	GO:0004470, GO:0004471, GO:0051287
AeUmb.PI554389.v2.3U.G0003200	285.348	10.943	1.19074	9.19003	3.92728e-20	2.22954e-18
AeUmb.PI554389.v2.3U.G0004000	114.726	4.82618	0.573295	8.41832	3.81933e-17	1.48266e-15
AeUmb.PI554389.v2.3U.G0004200	90.1228	-1.51707	0.334629	-4.53358	5.79915e-06	3.99968e-05
AeUmb.PI554389.v2.3U.G0005300	6.00471	-6.09995	2.19479	-2.77929	0.00544778	0.0177663
AeUmb.PI554389.v2.3U.G0005500	184.177	5.72903	1.31933	4.34237	1.40956e-05	8.96809e-05	WRKY domain, WRKY domain superfamily, WRKY transcription factor, plant	GO:0003700, GO:0006355, GO:0043565
AeUmb.PI554389.v2.3U.G0006100	2277.77	-0.806414	0.125578	-6.42164	1.3481e-10	2.03373e-09	Aminoacyl-tRNA synthetase, Glutamine-tRNA synthetase, Glutaminyl-tRNA synthetase, Glutamyl/glutaminyl-tRNA synthetase, Large ribosomal subunit protein bL25/Gln-tRNA synthetase, N-terminal, Rossmann-like alpha/beta/alpha sandwich fold, anti-codon binding domain, anti-codon-binding domain superfamily, catalytic domain, class I, class Ib, conserved site, non-specific RNA-binding domain, non-specific…	GO:0000166, GO:0004812, GO:0004819, GO:0005524, GO:0005737, GO:0006412, GO:0006418, GO:0006425, GO:0043039
AeUmb.PI554389.v2.3U.G0006400	5.74155	-5.83919	2.37945	-2.45401	0.0141273	0.0398617
AeUmb.PI554389.v2.3U.G0006500	15.4255	-2.26385	0.823686	-2.74844	0.00598795	0.0192535	FACT complex subunit SSRP1/POB3, High mobility group box domain, High mobility group box domain superfamily, Histone chaperone RTT106/FACT complex subunit SPT16-like, N-terminal PH domain, PH-like domain superfamily, SSRP1, SSRP1 domain superfamily, dimerization domain, middle domain	GO:0003677, GO:0005634
AeUmb.PI554389.v2.3U.G0006800	260.744	-0.911027	0.260177	-3.50156	0.000462542	0.00205376
AeUmb.PI554389.v2.3U.G0007800	660.615	2.15056	0.198906	10.812	3.02113e-27	3.77042e-25	Endonuclease I, His-Me finger superfamily	GO:0004518
AeUmb.PI554389.v2.3U.G0008000	194.122	1.63424	0.336292	4.85958	1.17637e-06	9.26193e-06
AeUmb.PI554389.v2.3U.G0009000	17.8524	-2.97829	0.798836	-3.72829	0.000192783	0.000949207	Cytochrome P450, Cytochrome P450 superfamily, E-class, conserved site, group I	GO:0004497, GO:0005506, GO:0016705, GO:0020037
AeUmb.PI554389.v2.3U.G0009200	3.85272	-6.58964	2.34527	-2.80976	0.0049579	0.0164079	Cytochrome P450, Cytochrome P450 superfamily, E-class, conserved site, group I	GO:0004497, GO:0005506, GO:0016705, GO:0020037
AeUmb.PI554389.v2.3U.G0009600	329.766	-1.48715	0.1896	-7.84364	4.37658e-15	1.27342e-13
AeUmb.PI554389.v2.3U.G0010700	69.1425	1.24755	0.507968	2.45595	0.0140512	0.0396797
AeUmb.PI554389.v2.3U.G0011200	188.305	0.756707	0.264379	2.8622	0.00420712	0.0142288
AeUmb.PI554389.v2.3U.G0013600	290.659	1.77491	0.579044	3.06525	0.00217489	0.0080183
AeUmb.PI554389.v2.3U.G0013700	18.4943	-6.79871	1.56415	-4.34657	1.38284e-05	8.80924e-05	C-terminal, DNA mismatch repair MutS family, DNA mismatch repair protein MutS, DNA mismatch repair protein MutS-like, MutS, N-terminal, P-loop containing nucleoside triphosphate hydrolase, connector domain, connector domain superfamily, core, core domain superfamily	GO:0005524, GO:0006298, GO:0030983, GO:0140664
AeUmb.PI554389.v2.3U.G0014400	9.31004	-5.90698	1.87754	-3.14612	0.00165449	0.00630922	BTB/Kelch-associated, BTB/POZ domain, BTB/POZ domain-containing protein POB1-like, SKP1/BTB/POZ domain superfamily	GO:0005515
AeUmb.PI554389.v2.3U.G0014500	6104.05	-1.1353	0.213229	-5.32431	1.01336e-07	9.673e-07	Serine incorporator/TMS membrane protein	GO:0016020
AeUmb.PI554389.v2.3U.G0015500	15.1275	7.00625	1.42648	4.91157	9.03493e-07	7.28243e-06
AeUmb.PI554389.v2.3U.G0016100	1053.22	-0.402839	0.106943	-3.76687	0.000165305	0.000826578	N-terminal, SNARE, Sly1p-binding domain, Syntaxin, Syntaxin-5, Syntaxin/epimorphin, Target SNARE coiled-coil homology domain, conserved site	GO:0005484, GO:0006886, GO:0016020, GO:0016192
AeUmb.PI554389.v2.3U.G0016400	105.471	5.69081	0.647742	8.78561	1.55518e-18	7.21498e-17
AeUmb.PI554389.v2.3U.G0016500	88.4648	-3.78754	0.599414	-6.31875	2.6369e-10	3.8399e-09	AP2/ERF domain, AP2/ERF domain superfamily, DNA-binding domain superfamily	GO:0003677, GO:0003700, GO:0006355
AeUmb.PI554389.v2.3U.G0016600	373.365	-1.28569	0.190556	-6.74705	1.50879e-11	2.64012e-10
AeUmb.PI554389.v2.3U.G0017300	1228.51	0.789699	0.215727	3.66064	0.000251587	0.00120287
AeUmb.PI554389.v2.3U.G0017400	349.566	1.30734	0.477548	2.73761	0.00618871	0.0198039
AeUmb.PI554389.v2.3U.G0018300	70.6707	1.41676	0.391527	3.61856	0.000296247	0.00138846
AeUmb.PI554389.v2.3U.G0018900	640.365	-0.313508	0.116296	-2.69576	0.00702274	0.0220525	Zinc/iron permease	GO:0016020, GO:0030001, GO:0046873, GO:0055085
AeUmb.PI554389.v2.3U.G0019400	95.2053	-1.05036	0.292345	-3.59289	0.000327034	0.00151049
AeUmb.PI554389.v2.3U.G0019500	129.343	0.750406	0.303796	2.4701	0.0135077	0.0383708	CDCA7/CDA7L, Zinc-finger domain of monoamine-oxidase A repressor R1	GO:0006355
AeUmb.PI554389.v2.3U.G0020100	145.89	-1.37677	0.570666	-2.41256	0.0158408	0.0438	ATP binding site, Protein kinase, Protein kinase domain, Protein kinase-like domain superfamily, Receptor-like kinase WAK-like, Serine/threonine-protein kinase, active site	GO:0004672, GO:0005524, GO:0006468, GO:0007166
AeUmb.PI554389.v2.3U.G0020600	92.8667	-3.29879	0.635944	-5.18723	2.1344e-07	1.91969e-06
AeUmb.PI554389.v2.3U.G0020900	1168.13	-0.454587	0.14528	-3.12904	0.0017538	0.00664346	Papain-like cysteine peptidase superfamily, Peptidase C19, RING/FYVE/PHD-type, UBA-like superfamily, UBP-type, Ubiquitin specific protease, Ubiquitin specific protease domain, Ubiquitin-associated domain, Ubiquitinyl hydrolase, Zinc finger, conserved site, ubiquitin carboxyl-terminal hydrolase, variant UBP zinc finger	GO:0004843, GO:0005515, GO:0008270, GO:0016579
AeUmb.PI554389.v2.3U.G0021000	89.102	-2.42895	0.53182	-4.56724	4.94183e-06	3.46054e-05	AAA+ ATPase domain, ABC transporter C family, ABC transporter type 1, ABC transporter-like, ATP-binding domain, P-loop containing nucleoside triphosphate hydrolase, conserved site, six-transmembrane helical domain 1, six-transmembrane helical domain 2, transmembrane domain, transmembrane domain superfamily	GO:0005524, GO:0016020, GO:0016887, GO:0055085, GO:0140359
AeUmb.PI554389.v2.3U.G0021300	58.7001	-2.30974	0.642194	-3.59664	0.000322358	0.001493
AeUmb.PI554389.v2.3U.G0021600	29.0852	-8.2857	1.58878	-5.21515	1.83667e-07	1.67942e-06
AeUmb.PI554389.v2.3U.G0021700	241.017	0.918113	0.280903	3.26843	0.00108146	0.00434684	Homeobox-like domain superfamily, Myb domain, Myb family transcription factor HRS1-like, plants	GO:0003677, GO:0003700, GO:0006355
AeUmb.PI554389.v2.3U.G0022000	21.3341	-8.07594	1.61726	-4.99358	5.92692e-07	4.94352e-06
AeUmb.PI554389.v2.3U.G0022400	13.8878	-2.32208	0.859888	-2.70045	0.00692465	0.0217875	DYW domain, E motif, E+ motif, Pentatricopeptide repeat, Pentatricopeptide repeat-containing protein At4g14850-like, Tetratricopeptide-like helical domain superfamily, plant	GO:0003723, GO:0005515, GO:0008270, GO:0009451
AeUmb.PI554389.v2.3U.G0022500	31.276	-2.83079	0.920756	-3.07442	0.00210915	0.00780643	UDP-glucuronosyl/UDP-glucosyltransferase, UDP-glycosyltransferase family, conserved site	GO:0008194
AeUmb.PI554389.v2.3U.G0022900	251.694	0.480577	0.201442	2.38569	0.0170473	0.0466151	Prefoldin, Prefoldin beta-like	GO:0006457, GO:0016272, GO:0051082
AeUmb.PI554389.v2.3U.G0023000	217.606	-3.33443	0.586172	-5.68849	1.28167e-08	1.41843e-07	UDP-glucuronosyl/UDP-glucosyltransferase, UDP-glycosyltransferase family, conserved site	GO:0008194
AeUmb.PI554389.v2.3U.G0023600	6.4391	-5.54789	1.91519	-2.89678	0.00377015	0.0129305
AeUmb.PI554389.v2.3U.G0023700	1397.43	1.73237	0.521275	3.32334	0.000889456	0.00366235	UDP-glucuronosyl/UDP-glucosyltransferase, UDP-glycosyltransferase family, conserved site	GO:0008194
AeUmb.PI554389.v2.3U.G0023800	248.457	-1.4537	0.284028	-5.11815	3.08552e-07	2.70977e-06	CBS domain, CBS domain superfamily, Chloride channel, core, voltage gated	GO:0005247, GO:0006821, GO:0016020, GO:0055085
AeUmb.PI554389.v2.3U.G0023900	260.583	-1.76831	0.48502	-3.64585	0.000266514	0.00126516	Chloride channel, Chloride channel ClC-plant, core, voltage gated	GO:0005247, GO:0006821, GO:0016020, GO:0055085
AeUmb.PI554389.v2.3U.G0024000	695.143	1.44686	0.346203	4.17922	2.92505e-05	0.000173971	UDP-glucuronosyl/UDP-glucosyltransferase, UDP-glycosyltransferase family, conserved site	GO:0008194
AeUmb.PI554389.v2.3U.G0024200	7.33531	6.86569	1.51225	4.54005	5.62418e-06	3.8945e-05
AeUmb.PI554389.v2.3U.G0024800	86.9696	-3.81908	0.401469	-9.51276	1.85669e-21	1.23244e-19	F-box domain, F-box-like domain superfamily	GO:0005515
AeUmb.PI554389.v2.3U.G0025200	944.355	-2.30099	0.287727	-7.99712	1.27362e-15	4.02361e-14	Bicarbonate transporter, Bicarbonate transporter-like, eukaryotic, transmembrane domain	GO:0005452, GO:0006820, GO:0016020
AeUmb.PI554389.v2.3U.G0025600	5.502	-5.41661	1.94431	-2.78587	0.00533841	0.0174606
AeUmb.PI554389.v2.3U.G0025800	423.278	-1.13796	0.179634	-6.33485	2.37567e-10	3.48132e-09
AeUmb.PI554389.v2.3U.G0025900	557.099	3.10188	1.15597	2.68335	0.00728877	0.0227789
AeUmb.PI554389.v2.3U.G0026400	146.794	-1.18849	0.302497	-3.92894	8.53224e-05	0.000456251	Cytochrome P450, Cytochrome P450 superfamily, E-class, conserved site, group I	GO:0004497, GO:0005506, GO:0016705, GO:0020037
AeUmb.PI554389.v2.3U.G0026700	958.88	0.361294	0.100197	3.60585	0.000311134	0.00144679
AeUmb.PI554389.v2.3U.G0027700	778.807	-0.519448	0.190632	-2.72487	0.00643269	0.0204872	FAD-binding domain, Ferredoxin-NADP reductase (FNR), Flavoprotein pyridine nucleotide cytochrome reductase, Flavoprotein pyridine nucleotide cytochrome reductase-like, NADH:cytochrome b5 reductase-like, Oxidoreductase FAD/NAD(P)-binding, Riboflavin synthase-like beta-barrel, ferredoxin reductase-type, nucleotide-binding domain	GO:0016491
AeUmb.PI554389.v2.3U.G0027800	78.0883	-1.29984	0.406298	-3.19922	0.00137798	0.00538255	BTB/POZ and MATH domain-containing protein 1-6, BTB/POZ domain, MATH/TRAF domain, SKP1/BTB/POZ domain superfamily, TRAF-like	GO:0005515, GO:0016567
AeUmb.PI554389.v2.3U.G0028000	547.091	-1.85284	0.279516	-6.62873	3.38588e-11	5.62798e-10
AeUmb.PI554389.v2.3U.G0028200	5647.61	1.31336	0.236936	5.54311	2.97152e-08	3.09789e-07	AAA+ ATPase domain, ABC transporter C family, ABC transporter type 1, ABC transporter-like, ATP-binding domain, P-loop containing nucleoside triphosphate hydrolase, conserved site, six-transmembrane helical domain 1, six-transmembrane helical domain 2, transmembrane domain, transmembrane domain superfamily	GO:0005524, GO:0016020, GO:0016887, GO:0055085, GO:0140359
AeUmb.PI554389.v2.3U.G0028500	100.105	0.901894	0.329932	2.73357	0.00626514	0.020019
AeUmb.PI554389.v2.3U.G0028600	445.795	1.78327	0.456711	3.90459	9.43868e-05	0.000499942
AeUmb.PI554389.v2.3U.G0028800	624.429	0.493852	0.203159	2.43086	0.0150631	0.0420458	Alba-like domain superfamily, DNA/RNA-binding Alba-related, DNA/RNA-binding protein Alba-like, Uncharacterised conserved protein UCP030333	GO:0003676
AeUmb.PI554389.v2.3U.G0029200	2232.32	1.39178	0.263993	5.27205	1.34907e-07	1.2591e-06	Embryo-specific ATS3, PLAT/LH2 domain superfamily	GO:0005515
AeUmb.PI554389.v2.3U.G0029400	104.69	1.7721	0.346289	5.11742	3.09745e-07	2.71946e-06
AeUmb.PI554389.v2.3U.G0029500	613.22	1.43078	0.507797	2.81763	0.00483796	0.0160804	C-terminal alpha helical domain, C-terminal domain superfamily, C-terminal-like, Glutathione S-transferase, Glutathione S-transferase Omega/Tau-like, Glutathione S-transferases Tau, Glutathione transferase family, N-terminal, Thioredoxin-like superfamily, plant	GO:0004364, GO:0006749
AeUmb.PI554389.v2.3U.G0029600	521.467	3.26464	0.322544	10.1215	4.43397e-24	4.03358e-22	Haem peroxidase, Haem peroxidase superfamily, Peroxidase, Peroxidases heam-ligand binding site, Plant peroxidase, Secretory peroxidase, active site	GO:0004601, GO:0006979, GO:0020037, GO:0042744
AeUmb.PI554389.v2.3U.G0029700	6349.19	-0.433721	0.147109	-2.9483	0.00319525	0.0112122	C-terminal, C2 domain, C2 domain superfamily, Phospholipase D, Phospholipase D family, Phospholipase D/Transphosphatidylase, plant	GO:0003824, GO:0004630, GO:0005509, GO:0016020, GO:0046470
AeUmb.PI554389.v2.3U.G0029800	1643.64	-0.663128	0.244499	-2.71219	0.00668404	0.021145
AeUmb.PI554389.v2.3U.G0030200	912.87	1.29512	0.24307	5.3282	9.91925e-08	9.48041e-07	Sugar phosphate transporter domain, Triose phosphate/phosphoenolpyruvate translocator	GO:0016020, GO:0022857, GO:0055085
AeUmb.PI554389.v2.3U.G0030600	406.402	4.25231	0.464672	9.15121	5.63012e-20	3.13151e-18
AeUmb.PI554389.v2.3U.G0030900	92.5014	-2.93667	0.47869	-6.1348	8.52655e-10	1.14453e-08	Alpha/Beta hydrolase fold, Alpha/beta hydrolase fold-3	GO:0016787
AeUmb.PI554389.v2.3U.G0031100	13.7298	-3.42235	1.37942	-2.48101	0.0131011	0.0374131	Alpha/Beta hydrolase fold, Alpha/beta hydrolase fold-3	GO:0016787
AeUmb.PI554389.v2.3U.G0032400	97.2112	9.89971	1.19761	8.26626	1.3823e-16	5.04205e-15
AeUmb.PI554389.v2.3U.G0032500	84.491	7.72331	1.04041	7.42334	1.14207e-13	2.71383e-12
AeUmb.PI554389.v2.3U.G0033000	6.07574	6.32491	1.56286	4.047	5.18781e-05	0.000291665
AeUmb.PI554389.v2.3U.G0033100	2288.22	1.06567	0.288573	3.6929	0.000221714	0.00107656
AeUmb.PI554389.v2.3U.G0033400	103.29	5.0068	0.596377	8.39535	4.64504e-17	1.78941e-15
AeUmb.PI554389.v2.3U.G0034600	201.153	1.42064	0.250121	5.67982	1.34839e-08	1.48628e-07
AeUmb.PI554389.v2.3U.G0035000	103.198	-3.16488	0.488594	-6.47753	9.32366e-11	1.44778e-09
AeUmb.PI554389.v2.3U.G0035100	137.555	-3.60361	0.541458	-6.65537	2.8258e-11	4.74666e-10
AeUmb.PI554389.v2.3U.G0036500	255.195	2.99387	0.360352	8.30819	9.71732e-17	3.62772e-15	Nucleic acid-binding, OB-fold, Replication factor A protein 1	GO:0003677, GO:0005634, GO:0006260, GO:0006281, GO:0006310
AeUmb.PI554389.v2.3U.G0036600	518.603	0.976701	0.204879	4.7672	1.86801e-06	1.41931e-05
AeUmb.PI554389.v2.3U.G0037000	6.12409	3.95731	1.47717	2.67899	0.00738448	0.023028
AeUmb.PI554389.v2.3U.G0037100	122.051	9.93732	1.20623	8.23831	1.74661e-16	6.28739e-15
AeUmb.PI554389.v2.3U.G0037700	892.707	0.484893	0.150411	3.22378	0.0012651	0.00499107	Alpha/Beta hydrolase fold, Peptidase S10, Serine carboxypeptidase, Serine carboxypeptidases, histidine active site, serine active site, serine carboxypeptidase	GO:0004185, GO:0006508
AeUmb.PI554389.v2.3U.G0037800	33.973	1.7653	0.546785	3.22851	0.00124435	0.00491908
AeUmb.PI554389.v2.3U.G0039500	500.719	-1.44852	0.343761	-4.21374	2.51178e-05	0.000151692	N-terminal, Rho termination factor, SAP domain superfamily	GO:0006353
AeUmb.PI554389.v2.3U.G0040200	1169.03	2.06128	0.220344	9.35486	8.3707e-21	5.09702e-19	Adenylate kinase, Adenylate kinase/UMP-CMP kinase, P-loop containing nucleoside triphosphate hydrolase, UMP-CMP kinase, conserved site	GO:0004127, GO:0005524, GO:0006139, GO:0006207, GO:0006221, GO:0009041, GO:0019205
AeUmb.PI554389.v2.3U.G0040300	101.432	8.08317	1.05582	7.65582	1.92079e-14	5.10667e-13
AeUmb.PI554389.v2.3U.G0040700	341.051	1.8561	0.311215	5.96403	2.4609e-09	3.06113e-08	CCHC-type, CCHC-type superfamily, Zinc finger	GO:0003676, GO:0008270
AeUmb.PI554389.v2.3U.G0040800	379.192	-0.46188	0.14484	-3.1889	0.00142817	0.00554943	DNA polymerase delta subunit 3, DNA polymerase delta subunit 3 superfamily	GO:0005634, GO:0006260, GO:0043625
AeUmb.PI554389.v2.3U.G0041000	15.1034	6.86867	1.33175	5.15761	2.5012e-07	2.2218e-06
AeUmb.PI554389.v2.3U.G0041700	591.055	0.400184	0.149483	2.67712	0.0074259	0.0231415	BES1/BZR1 plant transcription factor, BZR family, N-terminal	GO:0003700, GO:0006351, GO:0009742
AeUmb.PI554389.v2.3U.G0043100	310.944	-1.29754	0.251874	-5.15155	2.58345e-07	2.29149e-06
AeUmb.PI554389.v2.3U.G0043300	95.4111	3.24491	1.20347	2.6963	0.00701151	0.0220195
AeUmb.PI554389.v2.3U.G0043800	113.852	1.20556	0.479234	2.51559	0.0118832	0.0344893
AeUmb.PI554389.v2.3U.G0044600	70.4339	9.46354	1.20562	7.84955	4.17537e-15	1.22076e-13
AeUmb.PI554389.v2.3U.G0044900	8102.16	-3.27518	0.299366	-10.9404	7.38773e-28	9.87275e-26	Metallothionein-like protein 3	GO:0005507, GO:0006878, GO:0008270
AeUmb.PI554389.v2.3U.G0045300	161.055	0.933422	0.335161	2.78499	0.00535287	0.0175003	Class III homeodomain-leucine zipper family, Homeobox domain, Homeobox-like domain superfamily, MEKHLA, START domain, START-like domain superfamily	GO:0003677, GO:0003700, GO:0008289
AeUmb.PI554389.v2.3U.G0046000	207.497	2.39651	0.467548	5.1257	2.96439e-07	2.6087e-06	Glycoside hydrolase, Lysozyme-like domain superfamily, catalytic, family 19	GO:0004568, GO:0005975, GO:0006032, GO:0016998
AeUmb.PI554389.v2.3U.G0047200	1797.7	-0.279638	0.10511	-2.66042	0.00780435	0.0241454	Protein kinase domain, Protein kinase-like domain superfamily, Serine/threonine-protein kinase, active site	GO:0004672, GO:0005524, GO:0006468
AeUmb.PI554389.v2.3U.G0048000	61.0652	8.083	1.37656	5.8719	4.30826e-09	5.13489e-08
AeUmb.PI554389.v2.3U.G0048200	8.69649	5.2071	1.41001	3.69295	0.000221671	0.00107652
AeUmb.PI554389.v2.3U.G0048300	18.2164	6.84259	1.25613	5.44737	5.11211e-08	5.12943e-07	E3 ubiquitin-protein ligase SINA-like, RING/FYVE/PHD-type, SIAH-type, Seven-in-absentia protein, TRAF-like domain, Zinc finger, plant	GO:0005737, GO:0006511, GO:0007275, GO:0008270
AeUmb.PI554389.v2.3U.G0048600	31.5838	2.61529	0.630699	4.14665	3.3738e-05	0.000197759
AeUmb.PI554389.v2.3U.G0050000	173.596	-0.742964	0.258706	-2.87185	0.00408077	0.0138683
AeUmb.PI554389.v2.3U.G0050300	1158.58	0.514094	0.200132	2.56878	0.0102058	0.0303323
AeUmb.PI554389.v2.3U.G0052000	21.4105	7.07097	1.26643	5.58337	2.35904e-08	2.49467e-07
AeUmb.PI554389.v2.3U.G0052100	130.369	1.97389	0.434379	4.54417	5.51514e-06	3.82564e-05
AeUmb.PI554389.v2.3U.G0052200	16.8306	-2.1922	0.883788	-2.48046	0.0131213	0.0374571
AeUmb.PI554389.v2.3U.G0052700	10.3907	-2.64604	0.898169	-2.94603	0.00321877	0.0112832
AeUmb.PI554389.v2.3U.G0053300	3.2715	5.41134	2.10208	2.57428	0.010045	0.029913
AeUmb.PI554389.v2.3U.G0053500	65.2526	1.38364	0.489564	2.82627	0.0047094	0.0156887
AeUmb.PI554389.v2.3U.G0053600	28.4542	2.19308	0.721333	3.04032	0.00236325	0.00862222
AeUmb.PI554389.v2.3U.G0054100	915.593	3.21004	0.359364	8.93256	4.16274e-19	2.10239e-17
AeUmb.PI554389.v2.3U.G0054700	35.1364	3.49784	0.99144	3.52805	0.00041864	0.00188179	HIRAN domain	GO:0003676, GO:0008270, GO:0016818
AeUmb.PI554389.v2.3U.G0054900	46.9698	3.07329	0.962544	3.19288	0.00140862	0.0054866	Cathepsin propeptide inhibitor domain (I29), Cysteine peptidase, Papain-like cysteine endopeptidase, Papain-like cysteine peptidase superfamily, Peptidase C1A, asparagine active site, papain C-terminal	GO:0006508, GO:0008234
AeUmb.PI554389.v2.3U.G0055300	3.24202	6.44799	2.38678	2.70154	0.00690188	0.0217249
AeUmb.PI554389.v2.3U.G0055500	59.5372	2.84239	0.666042	4.26758	1.97609e-05	0.000122149	GDSL lipase/esterase, GDSL lipase/esterase-like, SGNH hydrolase superfamily, plant	GO:0016788
AeUmb.PI554389.v2.3U.G0056000	648.39	-0.555106	0.165302	-3.35814	0.000784699	0.00328111
AeUmb.PI554389.v2.3U.G0056700	343.144	-0.945202	0.370724	-2.54961	0.0107843	0.0317817	TCP, Transcription factor, Transcription factor TCP subgroup	GO:0003700
AeUmb.PI554389.v2.3U.G0058300	5.85472	-6.50427	1.86965	-3.47887	0.000503534	0.00221219	Jacalin-like lectin domain, Jacalin-like lectin domain superfamily, plant	GO:0030246
AeUmb.PI554389.v2.3U.G0058500	7424.74	-0.925119	0.1432	-6.46031	1.04487e-10	1.60923e-09	Calcium/proton exchanger, EF-Hand 1, EF-hand domain, EF-hand domain pair, NCX, Sodium/calcium exchanger membrane region, calcium-binding site, central ion-binding domain superfamily	GO:0005509, GO:0006812, GO:0008324, GO:0016020, GO:0055085
AeUmb.PI554389.v2.3U.G0059300	846.681	-0.875921	0.2645	-3.31161	0.000927594	0.00379661	Cupredoxin, Phytocyanin domain, Phytocyanin-like	GO:0009055
AeUmb.PI554389.v2.3U.G0059800	286.814	2.93228	0.317689	9.23005	2.70516e-20	1.57118e-18
AeUmb.PI554389.v2.3U.G0059900	27.364	-7.78793	1.50779	-5.16512	2.40279e-07	2.14131e-06
AeUmb.PI554389.v2.3U.G0060200	2855.47	0.880975	0.189002	4.66119	3.14381e-06	2.28463e-05
AeUmb.PI554389.v2.3U.G0061400	13.2421	-2.78185	1.08041	-2.57481	0.0100296	0.0298843	Protein kinase domain, Protein kinase-like domain superfamily	GO:0004672, GO:0005524, GO:0006468
AeUmb.PI554389.v2.3U.G0062000	869.46	0.774194	0.178101	4.34693	1.38056e-05	8.79842e-05	ATPase, Gcp-like domain, Kae1/TsaD family, TsaD, nucleotide binding domain, tRNA N6-adenosine threonylcarbamoyltransferase	GO:0002949
AeUmb.PI554389.v2.3U.G0062700	11.7271	5.38943	2.08146	2.58925	0.0096184	0.0288418	CENP-T/Histone H4, Histone H4, Histone-fold, conserved site, histone fold	GO:0000786, GO:0003677, GO:0030527, GO:0046982
AeUmb.PI554389.v2.3U.G0062900	109.569	9.2658	1.20297	7.70244	1.33496e-14	3.59988e-13
AeUmb.PI554389.v2.3U.G0063200	12383.4	-0.887845	0.118781	-7.47467	7.73983e-14	1.88515e-12	His active site, Lys active site, Phosphoenolpyruvate carboxylase, Pyruvate/Phosphoenolpyruvate kinase-like domain superfamily, bacterial/plant-type	GO:0003824, GO:0006099, GO:0008964, GO:0015977
AeUmb.PI554389.v2.3U.G0063600	57.0299	-1.09912	0.437082	-2.51467	0.0119144	0.0345633
AeUmb.PI554389.v2.3U.G0063900	1449.85	-1.41782	0.251105	-5.64634	1.63898e-08	1.77932e-07	ATP binding site, NAF domain, NAF/FISL domain, Protein kinase, Protein kinase domain, Protein kinase-like domain superfamily, Serine/threonine-protein kinase, active site	GO:0004672, GO:0005524, GO:0006468, GO:0007165
AeUmb.PI554389.v2.3U.G0064000	155.109	-1.04245	0.385763	-2.7023	0.00688612	0.0216835
AeUmb.PI554389.v2.3U.G0064400	123.369	2.80222	0.476944	5.87536	4.21915e-09	5.04461e-08
AeUmb.PI554389.v2.3U.G0064700	645.213	12.4336	1.18486	10.4937	9.23147e-26	1.01755e-23	Ankyrin repeat, Ankyrin repeat-containing domain superfamily	GO:0005515
AeUmb.PI554389.v2.3U.G0065100	1229.4	0.722335	0.280714	2.57321	0.0100761	0.029997
AeUmb.PI554389.v2.3U.G0067200	81.9907	-2.44687	0.454746	-5.38074	7.41822e-08	7.22959e-07	AAA ATPase, AAA+ ATPase domain, AAA+ lid domain, AAA-type, ATPase, Aspartate decarboxylase-like domain superfamily, CDC48, CDC48 domain 2-like superfamily, CDC48 family, N-terminal subdomain, P-loop containing nucleoside triphosphate hydrolase, conserved site, core, domain 2	GO:0005524, GO:0016787, GO:0016887
AeUmb.PI554389.v2.3U.G0068700	274.034	-1.628	0.401648	-4.05329	5.05019e-05	0.000284935
AeUmb.PI554389.v2.3U.G0068800	655.661	-0.395548	0.13576	-2.91358	0.00357312	0.0123403
AeUmb.PI554389.v2.3U.G0069200	7.30669	-5.48947	1.86441	-2.94434	0.00323643	0.0113356
AeUmb.PI554389.v2.3U.G0070300	4.36535	-6.23136	2.37627	-2.62233	0.00873304	0.0265401	Aspartic peptidase, Aspartic peptidase domain superfamily, LDOC1-related, Retrotransposon gag domain, active site	GO:0004190, GO:0006508
AeUmb.PI554389.v2.3U.G0070900	432.737	1.08535	0.213084	5.09352	3.51468e-07	3.05557e-06	GDSL lipase/esterase, GDSL lipase/esterase-like, SGNH hydrolase superfamily, plant	GO:0016788
AeUmb.PI554389.v2.3U.G0071600	13258.9	-0.694656	0.275994	-2.51692	0.0118385	0.0343894	Nodulin-related protein 1/2	GO:0009408, GO:0010115
AeUmb.PI554389.v2.3U.G0072800	54.1661	8.9466	1.22618	7.29634	2.95698e-13	6.60552e-12
AeUmb.PI554389.v2.3U.G0074200	1488.7	-0.281266	0.0996916	-2.82137	0.00478197	0.0159111
AeUmb.PI554389.v2.3U.G0074400	14.4713	1.71225	0.701955	2.43925	0.0147176	0.0412454
AeUmb.PI554389.v2.3U.G0074700	453.679	-2.25562	0.770354	-2.92803	0.00341118	0.0118705	LEA_2 subgroup, Late embryogenesis abundant protein, Late embryogenesis abundant protein Lea14-like, Water stress and hypersensitive response domain	GO:0009269
AeUmb.PI554389.v2.3U.G0076500	14.4034	3.11235	0.743856	4.18407	2.86333e-05	0.000170637	ATP binding site, Proline-rich receptor-like protein kinase PERK1-13-like, Protein kinase, Protein kinase domain, Protein kinase-like domain superfamily	GO:0004672, GO:0005524, GO:0006468
AeUmb.PI554389.v2.3U.G0076900	2003.04	-0.973923	0.274258	-3.55112	0.000383588	0.00174003	Cytochrome P450, Cytochrome P450 superfamily, E-class, conserved site, group I	GO:0004497, GO:0005506, GO:0016705, GO:0020037
AeUmb.PI554389.v2.3U.G0077300	1553.73	-2.67372	0.258934	-10.3258	5.38417e-25	5.43855e-23	Cytochrome P450, Cytochrome P450 superfamily, E-class, conserved site, group I	GO:0004497, GO:0005506, GO:0016705, GO:0020037
AeUmb.PI554389.v2.3U.G0077400	793.488	-0.54618	0.115549	-4.72681	2.28075e-06	1.70124e-05	Mpv17/PMP22	GO:0016020
AeUmb.PI554389.v2.3U.G0078100	13.1234	-2.23919	0.93611	-2.39202	0.016756	0.0459431
AeUmb.PI554389.v2.3U.G0078300	19.0603	-7.10408	1.61754	-4.39189	1.12368e-05	7.2952e-05
AeUmb.PI554389.v2.3U.G0078400	6.09862	-5.82991	1.99483	-2.92252	0.00347213	0.0120493
AeUmb.PI554389.v2.3U.G0078500	1210.84	0.431328	0.15699	2.74749	0.00600526	0.019303	Proteasome component (PCI) domain, Translation initiation factor 3 complex subunit L	GO:0003743, GO:0005737, GO:0005852
AeUmb.PI554389.v2.3U.G0078600	2336.45	-0.434631	0.111843	-3.88608	0.000101876	0.000534922	ENTH/VHS, GAT domain, GAT domain superfamily, TOM1-like protein, VHS domain, plant	GO:0035091, GO:0043130, GO:0043328
AeUmb.PI554389.v2.3U.G0078700	447.04	1.67145	0.290706	5.74961	8.94469e-09	1.01369e-07
AeUmb.PI554389.v2.3U.G0078900	148.965	-0.808345	0.333147	-2.42639	0.0152498	0.0425002	P-loop containing nucleoside triphosphate hydrolase, Small GTP-binding protein domain, Small GTPase, Small GTPase Rho	GO:0003924, GO:0005525, GO:0007264
AeUmb.PI554389.v2.3U.G0079800	2297.63	-0.759469	0.208079	-3.64991	0.000262337	0.00124813	AUX/IAA domain, AUX/IAA protein, PB1 domain	GO:0005515, GO:0005634, GO:0006355
AeUmb.PI554389.v2.3U.G0080200	257.776	0.889551	0.200896	4.42791	9.51514e-06	6.27048e-05	A-kinase anchor protein 7-like, Activating signal cointegrator 1 complex subunit 1, Cyclic phosphodiesterase, K Homology domain, phosphoesterase domain, type 1, type 1 superfamily	GO:0003676, GO:0003723, GO:0006307
AeUmb.PI554389.v2.3U.G0080800	43.4796	1.59693	0.435242	3.66907	0.000243438	0.00116796
AeUmb.PI554389.v2.3U.G0081100	6.68491	5.77351	1.54798	3.7297	0.000191706	0.000944211
AeUmb.PI554389.v2.3U.G0081500	6.62149	-5.5369	1.97144	-2.80855	0.00497644	0.016453
AeUmb.PI554389.v2.3U.G0082700	314.669	1.74586	0.431218	4.04868	5.15082e-05	0.000289855
AeUmb.PI554389.v2.3U.G0083600	371.331	0.82406	0.146057	5.64205	1.68033e-08	1.82158e-07	Longin domain, Longin-like domain superfamily, Vesicle-trafficking protein Sec22, coiled-coil homology domain, v-SNARE	GO:0005484, GO:0006888, GO:0006890
AeUmb.PI554389.v2.3U.G0083900	908.597	-0.681733	0.177564	-3.83936	0.000123356	0.000635117	RING-type, RING/FYVE/PHD-type, SIAH-type, Seven-in-absentia protein, TRAF-like, TRAF-like domain, Zinc finger	GO:0005515, GO:0005737, GO:0006511, GO:0007275, GO:0008270
AeUmb.PI554389.v2.3U.G0084100	275.789	-0.408465	0.159462	-2.56152	0.0104215	0.0308639
AeUmb.PI554389.v2.3U.G0085400	12267.6	-0.601074	0.253522	-2.3709	0.017745	0.0481954
AeUmb.PI554389.v2.3U.G0085500	22.9938	2.08354	0.681852	3.05571	0.00224529	0.00824767	F-box associated interaction domain, F-box domain, F-box-like domain superfamily	GO:0005515
AeUmb.PI554389.v2.3U.G0085800	266.269	-1.03755	0.224879	-4.61383	3.95325e-06	2.80866e-05
AeUmb.PI554389.v2.3U.G0086100	574.795	7.4162	0.474355	15.6343	4.25171e-55	2.51785e-52	DEDDh 3'-5' exonuclease domain, ERI-1-like, Exonuclease, RNase T/DNA polymerase III, Ribonuclease H superfamily, Ribonuclease H-like superfamily	GO:0000175, GO:0003676
AeUmb.PI554389.v2.3U.G0086200	516.416	5.11929	0.348013	14.71	5.55683e-49	2.43228e-46	DEDDh 3'-5' exonuclease domain, ERI-1-like, Exonuclease, RNase T/DNA polymerase III, Ribonuclease H superfamily, Ribonuclease H-like superfamily	GO:0000175, GO:0003676
AeUmb.PI554389.v2.3U.G0086300	1087.33	0.662683	0.180837	3.66453	0.000247789	0.00118714	Glycoside hydrolase, Glycoside hydrolase superfamily, family 14, family 14B, plant	GO:0000272, GO:0016161
AeUmb.PI554389.v2.3U.G0087200	175.355	10.5853	1.19707	8.84268	9.34486e-19	4.50852e-17
AeUmb.PI554389.v2.3U.G0087400	281.448	-0.497897	0.169108	-2.94426	0.00323728	0.0113373	Small ribosomal subunit protein uS8, Small ribosomal subunit protein uS8 superfamily, conserved site	GO:0003735, GO:0005840, GO:0006412
AeUmb.PI554389.v2.3U.G0087800	24.6526	-2.27544	0.794664	-2.8634	0.00419124	0.0141831	Metal-nicotianamine transporter YSL-like, OPT superfamily, Oligopeptide transporter	GO:0035673
AeUmb.PI554389.v2.3U.G0089300	1081.61	-0.380258	0.13459	-2.8253	0.00472371	0.0157346
AeUmb.PI554389.v2.3U.G0089500	37.2959	-2.2244	0.568586	-3.91216	9.14731e-05	0.000486129
AeUmb.PI554389.v2.3U.G0090300	156.079	5.08906	0.68466	7.43297	1.06186e-13	2.5332e-12
AeUmb.PI554389.v2.3U.G0091400	32.2342	1.92266	0.672693	2.85816	0.00426108	0.0143872
AeUmb.PI554389.v2.3U.G0092200	12.2999	4.73043	1.69688	2.78772	0.00530797	0.0173836
AeUmb.PI554389.v2.3U.G0092300	101.433	9.8585	1.20069	8.2107	2.19904e-16	7.86912e-15	DEDDh 3'-5' exonuclease domain, ERI-1-like, Exonuclease, RNase T/DNA polymerase III, Ribonuclease H superfamily, Ribonuclease H-like superfamily	GO:0000175, GO:0003676
AeUmb.PI554389.v2.3U.G0092400	226.183	1.90534	0.237308	8.02899	9.82821e-16	3.16789e-14
AeUmb.PI554389.v2.3U.G0092500	167.867	1.09555	0.318346	3.44137	0.000578779	0.00250713
AeUmb.PI554389.v2.3U.G0092600	1623.25	2.13581	0.10978	19.4553	2.62666e-84	5.28869e-81	Glycoside hydrolase family 1, Glycoside hydrolase superfamily, Glycosyl hydrolases family 1, N-terminal conserved site	GO:0004553, GO:0005975
AeUmb.PI554389.v2.3U.G0093500	1870.06	-0.564502	0.165891	-3.40284	0.00066689	0.00284363	Ankyrin repeat, Ankyrin repeat-containing domain superfamily	GO:0005515
AeUmb.PI554389.v2.3U.G0094000	1154.32	-0.776719	0.128679	-6.03611	1.57875e-09	2.02555e-08	C2 domain, C2 domain superfamily, SMP domain, Synaptotagmin, Synaptotagmin-like mitochondrial-lipid-binding domain	GO:0008289
AeUmb.PI554389.v2.3U.G0094400	4.43494	-5.20014	2.01082	-2.58607	0.00970769	0.0290865
AeUmb.PI554389.v2.3U.G0094700	160.958	10.2557	1.20974	8.47762	2.2985e-17	9.20679e-16	DEDDh 3'-5' exonuclease domain, ERI-1-like, Exonuclease, RNase T/DNA polymerase III, Ribonuclease H superfamily, Ribonuclease H-like superfamily	GO:0000175, GO:0003676
AeUmb.PI554389.v2.3U.G0095000	140.93	9.6038	1.23016	7.80696	5.85818e-15	1.67072e-13	DEDDh 3'-5' exonuclease domain, ERI-1-like, Exonuclease, RNase T/DNA polymerase III, Ribonuclease H superfamily, Ribonuclease H-like superfamily	GO:0000175, GO:0003676
AeUmb.PI554389.v2.3U.G0095300	10.9826	6.47922	1.29659	4.99713	5.81904e-07	4.86294e-06
AeUmb.PI554389.v2.3U.G0095500	17.5192	7.20786	1.3008	5.54109	3.00602e-08	3.13194e-07
AeUmb.PI554389.v2.3U.G0095600	405.233	11.4361	1.21124	9.44166	3.66923e-21	2.35783e-19	DEDDh 3'-5' exonuclease domain, ERI-1-like, Exonuclease, RNase T/DNA polymerase III, Ribonuclease H superfamily, Ribonuclease H-like superfamily	GO:0000175, GO:0003676
AeUmb.PI554389.v2.3U.G0095800	437.178	-0.713141	0.264285	-2.69838	0.00696769	0.0219024	Biopterin transporter family, Folate-biopterin transporter, MFS transporter superfamily	GO:0016020
AeUmb.PI554389.v2.3U.G0096600	83.3415	2.20951	0.53815	4.10576	4.0299e-05	0.000232096
AeUmb.PI554389.v2.3U.G0097300	61.67	-1.60719	0.566996	-2.83458	0.00458866	0.0153389	DNA helicase Pif1-like, P-loop containing nucleoside triphosphate hydrolase	GO:0000723, GO:0003678, GO:0006281
AeUmb.PI554389.v2.3U.G0097400	34.6599	-1.65322	0.664478	-2.48799	0.0128466	0.036794
AeUmb.PI554389.v2.3U.G0098200	44.6556	-8.04391	1.57057	-5.12165	3.02881e-07	2.66306e-06
AeUmb.PI554389.v2.3U.G0098300	11.7467	2.32158	0.985355	2.35609	0.0184685	0.0498157
AeUmb.PI554389.v2.3U.G0099200	101.716	-1.35146	0.332955	-4.05898	4.92872e-05	0.000278446	ATP binding site, Protein kinase, Protein kinase domain, Protein kinase-like domain superfamily, Serine/threonine-protein kinase, active site	GO:0004672, GO:0005524, GO:0006468
AeUmb.PI554389.v2.3U.G0099600	31.7043	-8.06511	1.51957	-5.30749	1.11146e-07	1.05399e-06	Aminotransferase-like, Protein MAINTENANCE OF MERISTEMS-like, plant mobile domain	GO:0010073, GO:0048507
AeUmb.PI554389.v2.3U.G0099900	639.879	-0.568946	0.180122	-3.15867	0.00158492	0.00607846	Isocitrate dehydrogenase NADP-dependent, Isocitrate/isopropylmalate dehydrogenase, Isopropylmalate dehydrogenase-like domain, conserved site	GO:0000287, GO:0004450, GO:0006102, GO:0016616, GO:0051287
AeUmb.PI554389.v2.3U.G0100100	754.269	2.57156	0.731775	3.51414	0.000441174	0.00197164
AeUmb.PI554389.v2.3U.G0100200	135.578	-1.32597	0.321281	-4.12715	3.67291e-05	0.000213736
AeUmb.PI554389.v2.3U.G0100900	422.192	1.2358	0.242104	5.1044	3.31846e-07	2.89917e-06
AeUmb.PI554389.v2.3U.G0101300	389.806	0.883425	0.222027	3.97891	6.92315e-05	0.000377424	GLABROUS1 enhancer-binding protein family	GO:0006355
AeUmb.PI554389.v2.3U.G0101400	84.0027	1.46114	0.356224	4.10175	4.10037e-05	0.00023557
AeUmb.PI554389.v2.3U.G0101700	203.245	-0.606711	0.207412	-2.92515	0.00344287	0.0119684	Protein TRIGALACTOSYLDIACYLGLYCEROL 4-like, Protein of unknown function DUF3769	GO:0034196, GO:0070300, GO:1990052
AeUmb.PI554389.v2.3U.G0101900	553.447	-0.535881	0.146491	-3.65812	0.000254072	0.00121262	E3 ubiquitin-protein ligase ZNF598/Hel2, RING-type, Zinc finger, Zinc finger C2H2-type	GO:0061630, GO:0072344
AeUmb.PI554389.v2.3U.G0102500	22.2355	2.44139	0.708833	3.44425	0.000572656	0.00248247
AeUmb.PI554389.v2.3U.G0102700	11.4397	-6.44316	1.78651	-3.60656	0.000310288	0.00144374
AeUmb.PI554389.v2.3U.G0103100	13.4703	7.2432	1.26748	5.71462	1.09948e-08	1.2285e-07
AeUmb.PI554389.v2.3U.G0103200	62.0226	1.84525	0.431132	4.28001	1.86885e-05	0.000116018
AeUmb.PI554389.v2.3U.G0103800	774.951	12.6585	1.19306	10.6102	2.67293e-26	3.0695e-24	Myotubularin family, Myotubularin-like, PH-like domain superfamily, Protein-tyrosine phosphatase, Protein-tyrosine phosphatase-like, active site, phosphatase domain	GO:0016311, GO:0016791
[truncated: 9,204 more rows]

## Sheet: U89I6_vs_U17I6
Gene	baseMean	log2FoldChange	lfcSE	stat	pvalue	padj	interpro_description	go
AeUmb.PI554389.v2.Un.G0055900	26.7812	-2.33888	0.604447	-3.86945	0.000109082	0.000422796
AeUmb.PI554389.v2.5U.G0001100	11.5569	-6.66513	1.32247	-5.0399	4.65779e-07	2.81322e-06	Microtubule-associated protein 70	GO:0007010, GO:0008017
AeUmb.PI554389.v2.5U.G0001200	28.1328	8.22163	1.23112	6.67819	2.41909e-11	2.7343e-10
AeUmb.PI554389.v2.5U.G0001300	78.0138	9.76132	1.20179	8.1223	4.57429e-16	9.54341e-15
AeUmb.PI554389.v2.5U.G0001500	458.136	0.900018	0.229304	3.925	8.67302e-05	0.000342858	Microtubule-associated protein 70	GO:0007010, GO:0008017
AeUmb.PI554389.v2.5U.G0001600	1555.27	0.332758	0.101486	3.27885	0.00104231	0.00326879	ATP binding site, Protein kinase, Protein kinase domain, Protein kinase-like domain superfamily, Serine/threonine-protein kinase, active site	GO:0004672, GO:0005524, GO:0006468
AeUmb.PI554389.v2.5U.G0001700	1908.89	1.00698	0.169686	5.93438	2.94961e-09	2.49354e-08
AeUmb.PI554389.v2.5U.G0002700	25.9326	-5.05032	0.8052	-6.27213	3.5615e-10	3.40831e-09
AeUmb.PI554389.v2.5U.G0002800	39.1568	1.77243	0.557933	3.17678	0.0014892	0.00448778	Glycoside hydrolase family 17, Glycoside hydrolase superfamily, X8 domain, plant	GO:0004553, GO:0005975
AeUmb.PI554389.v2.5U.G0004400	31.4782	-4.47277	0.903914	-4.94822	7.48935e-07	4.37764e-06	ATP binding site, Bulb-type lectin domain, Bulb-type lectin domain superfamily, PAN/Apple domain, Protein kinase, Protein kinase domain, Protein kinase-like domain superfamily, Serine/threonine-protein kinase, active site	GO:0004672, GO:0005524, GO:0006468
AeUmb.PI554389.v2.5U.G0004500	882.028	-0.750984	0.166838	-4.50128	6.7546e-06	3.32701e-05
AeUmb.PI554389.v2.5U.G0004700	28.4011	5.04655	1.13179	4.45889	8.23852e-06	3.9821e-05	MFS transporter superfamily, Major facilitator, Major facilitator superfamily domain, Sugar transport protein STP/MST-like, Sugar transport protein STP/Polyol transporter PLT, Sugar transporter, Sugar/inositol transporter, conserved site, plant, sugar transporter-like	GO:0015144, GO:0015145, GO:0015749, GO:0016020, GO:0022857, GO:0055085
AeUmb.PI554389.v2.5U.G0005400	15317.6	0.603358	0.118944	5.07264	3.92344e-07	2.4e-06	Carotenoid oxygenase	GO:0016702
AeUmb.PI554389.v2.5U.G0006800	6950.01	-0.555077	0.108471	-5.1173	3.09941e-07	1.93074e-06	C-terminal, HAD superfamily, HAD-like superfamily, HAD-superfamily hydrolase, NTF2-like domain superfamily, Sucrose phosphatase, Sucrose phosphatase-like domain, Sucrose-phosphatase, plant/cyanobacteria, subfamily IIB	GO:0000287, GO:0005986, GO:0050307
AeUmb.PI554389.v2.5U.G0007300	6.0448	6.11083	1.39613	4.37699	1.20329e-05	5.63155e-05	Leucine-rich repeat, Leucine-rich repeat domain superfamily, U2 small nuclear ribonucleoprotein A'	GO:0000398, GO:0005515, GO:0030620
AeUmb.PI554389.v2.5U.G0007600	3.95218	4.52879	1.85435	2.44225	0.0145961	0.0337848	C-terminal, Chalcone/stilbene synthase, N-terminal, Polyketide synthase, Thiolase-like, type III	GO:0009058, GO:0016746, GO:0016747
AeUmb.PI554389.v2.5U.G0008700	49.7392	6.23226	1.15539	5.39406	6.88834e-08	4.72467e-07	AAA+ ATPase domain, AAA-type, AAA-type ATPase, ATPase, N-terminal domain, P-loop containing nucleoside triphosphate hydrolase, conserved site, core	GO:0005524, GO:0016887
AeUmb.PI554389.v2.5U.G0009300	243.568	10.5831	1.22854	8.61438	7.03224e-18	1.88071e-16
AeUmb.PI554389.v2.5U.G0009600	629.225	-0.456131	0.119017	-3.83249	0.000126853	0.000484906	Pentatricopeptide repeat, Smr domain, Smr domain superfamily, Tetratricopeptide-like helical domain superfamily	GO:0005515
AeUmb.PI554389.v2.5U.G0009800	98.4989	9.77495	1.19174	8.20223	2.35964e-16	5.14264e-15	F-box domain, F-box-like domain superfamily	GO:0005515
AeUmb.PI554389.v2.5U.G0009900	659.079	0.517738	0.209973	2.46574	0.0136731	0.0319153	A domain superfamily, Cation-transporting P-type ATPase, HAD superfamily, HAD-like superfamily, N-terminal, P-type ATPase, cytoplasmic domain N, haloacid dehalogenase domain, phosphorylation site, subfamily IIIA, transmembrane domain superfamily	GO:0000166, GO:0005215, GO:0005524, GO:0008553, GO:0016020, GO:0016887, GO:0120029
AeUmb.PI554389.v2.5U.G0010100	2231.46	1.90415	0.294402	6.46787	9.93934e-11	1.0274e-09	MFS transporter superfamily, Proton-dependent oligopeptide transporter family	GO:0016020, GO:0022857, GO:0055085
AeUmb.PI554389.v2.5U.G0010800	1664.41	0.332893	0.107484	3.09715	0.00195391	0.00571947	DIRP domain, Homeobox-like domain superfamily, Protein LIN-9/Protein ALWAYS EARLY, SANT/Myb domain	GO:0006351, GO:0017053
AeUmb.PI554389.v2.5U.G0012400	1088.83	-0.652779	0.140389	-4.6498	3.32263e-06	1.7366e-05
AeUmb.PI554389.v2.5U.G0012900	162.746	1.51189	0.253446	5.96534	2.44122e-09	2.08273e-08	PA clan, PDZ domain, PDZ domain 6, PDZ superfamily, Peptidase M50, Peptidase S1, chymotrypsin-like fold	GO:0005515, GO:0006508
AeUmb.PI554389.v2.5U.G0013400	18.8314	-1.921	0.537027	-3.57711	0.000347416	0.00121374
AeUmb.PI554389.v2.5U.G0013600	112.092	-1.2931	0.214923	-6.01657	1.78148e-09	1.55218e-08	PA clan, PDZ domain 6, PDZ superfamily, Peptidase S1	GO:0005515
AeUmb.PI554389.v2.5U.G0013700	57.4009	-2.39004	0.600934	-3.97721	6.97275e-05	0.000280922	PA clan, PDZ domain, PDZ domain 6, PDZ superfamily, Peptidase M50, Peptidase S1, chymotrypsin-like fold	GO:0005515, GO:0006508
AeUmb.PI554389.v2.5U.G0013800	13.7979	-6.43219	1.41374	-4.54978	5.37017e-06	2.70376e-05	Protein kinase domain, Protein kinase-like domain superfamily, Receptor-like kinase WAK-like, Serine-threonine/tyrosine-protein kinase, Serine/threonine-protein kinase, active site, catalytic domain	GO:0004672, GO:0005524, GO:0006468, GO:0007166
AeUmb.PI554389.v2.5U.G0014100	106.003	-5.79503	0.505737	-11.4586	2.12943e-30	2.08697e-28	ATP binding site, Immunoglobulin-like fold, Major sperm protein (MSP) domain, PapD-like superfamily, Protein kinase, Protein kinase domain, Protein kinase-like domain superfamily, Serine/threonine-protein kinase, active site	GO:0004672, GO:0005524, GO:0006468
AeUmb.PI554389.v2.5U.G0014700	10.3748	6.73551	1.38686	4.85667	1.19377e-06	6.7297e-06	ATP binding site, Immunoglobulin-like fold, Major sperm protein (MSP) domain, PapD-like superfamily, Protein kinase, Protein kinase domain, Protein kinase-like domain superfamily, Serine/threonine-protein kinase, active site	GO:0004672, GO:0005524, GO:0006468
AeUmb.PI554389.v2.5U.G0014900	32.0271	8.56832	1.21012	7.08054	1.43592e-12	1.92174e-11	ATP binding site, Protein kinase, Protein kinase domain, Protein kinase-like domain superfamily, Serine-threonine/tyrosine-protein kinase, Serine/threonine-protein kinase, active site, catalytic domain	GO:0004672, GO:0005524, GO:0006468
AeUmb.PI554389.v2.5U.G0015600	31.1294	8.35868	1.21833	6.86076	6.84966e-12	8.34279e-11	ATP binding site, Protein kinase, Protein kinase domain, Protein kinase-like domain superfamily, Serine-threonine/tyrosine-protein kinase, Serine/threonine-protein kinase, active site, catalytic domain	GO:0004672, GO:0005524, GO:0006468
AeUmb.PI554389.v2.5U.G0016200	6.33454	5.60073	1.62098	3.45516	0.000549964	0.00184473
AeUmb.PI554389.v2.5U.G0018300	2495.25	-0.76975	0.124121	-6.2016	5.58911e-10	5.24164e-09	Homeobox KN domain, Homeobox domain, Homeobox-like domain superfamily, POX domain	GO:0003677, GO:0006355
AeUmb.PI554389.v2.5U.G0019100	7.74692	-6.71814	1.66553	-4.03365	5.49183e-05	0.000225695	PA clan, PDZ domain 6, PDZ superfamily, Peptidase S1, Peptidase S1C	GO:0004252, GO:0005515, GO:0006508
AeUmb.PI554389.v2.5U.G0019800	45.9254	-11.0113	1.32948	-8.28241	1.2071e-16	2.74054e-15	Cytochrome P450, Cytochrome P450 superfamily, E-class, conserved site, group I	GO:0004497, GO:0005506, GO:0016705, GO:0020037
AeUmb.PI554389.v2.5U.G0020100	86.3741	-10.4988	1.24597	-8.42617	3.57163e-17	8.73072e-16	Cytochrome P450, Cytochrome P450 superfamily, E-class, conserved site, group I	GO:0004497, GO:0005506, GO:0016705, GO:0020037
AeUmb.PI554389.v2.5U.G0020200	522.507	-7.25962	0.481214	-15.0861	2.00058e-51	5.90042e-49	Cytochrome P450, Cytochrome P450 superfamily, E-class, conserved site, group I	GO:0004497, GO:0005506, GO:0016705, GO:0020037
AeUmb.PI554389.v2.5U.G0020300	17.8047	-3.88096	0.826638	-4.69487	2.66771e-06	1.41658e-05	Ankyrin repeat, Ankyrin repeat-containing domain superfamily	GO:0005515
AeUmb.PI554389.v2.5U.G0020500	895.882	-4.02327	0.214055	-18.7955	8.22133e-79	8.36931e-76	Ankyrin repeat, Ankyrin repeat-containing domain superfamily, Tetratricopeptide repeat, Tetratricopeptide repeat 2, Tetratricopeptide-like helical domain superfamily	GO:0005515
AeUmb.PI554389.v2.5U.G0021300	1632.52	0.963682	0.238863	4.03445	5.47303e-05	0.000225039	SAC domain, WW domain, WW domain superfamily	GO:0005515, GO:0016791
AeUmb.PI554389.v2.5U.G0021500	47.2933	1.18865	0.506401	2.34726	0.0189122	0.0422086	Basic-leucine zipper domain, Basic-leucine zipper domain superfamily, Plant bZIP transcription factors	GO:0003700, GO:0006355, GO:0045893
AeUmb.PI554389.v2.5U.G0022100	12.4661	-7.80636	1.42172	-5.49077	4.00181e-08	2.8689e-07
AeUmb.PI554389.v2.5U.G0023600	153.195	2.19701	0.82364	2.66744	0.00764319	0.0192118
AeUmb.PI554389.v2.5U.G0024000	313.718	-0.718167	0.192992	-3.72123	0.000198254	0.000727837
AeUmb.PI554389.v2.5U.G0024100	1120.45	0.500071	0.0984498	5.07945	3.78523e-07	2.32085e-06	Peroxin-3	GO:0005778, GO:0007031
AeUmb.PI554389.v2.5U.G0024300	381.611	-0.725888	0.289301	-2.50911	0.0121036	0.0286848	Basic-leucine zipper domain, Basic-leucine zipper domain superfamily	GO:0003700, GO:0006355
AeUmb.PI554389.v2.5U.G0024400	346.242	-2.23853	0.359809	-6.22144	4.92613e-10	4.65167e-09
AeUmb.PI554389.v2.5U.G0024900	11.1335	7.27772	1.42586	5.10408	3.3241e-07	2.05892e-06
AeUmb.PI554389.v2.5U.G0025000	20.6365	6.96842	1.83758	3.79218	0.000149331	0.00056243
AeUmb.PI554389.v2.5U.G0025100	49.0336	7.12724	1.26849	5.6187	1.92399e-08	1.4429e-07
AeUmb.PI554389.v2.5U.G0025300	33.8706	1.98736	0.658241	3.0192	0.0025344	0.00722694
AeUmb.PI554389.v2.5U.G0026100	20.4571	-7.38976	1.32619	-5.57217	2.5158e-08	1.85456e-07
AeUmb.PI554389.v2.5U.G0026200	66.6712	9.76002	1.23102	7.9284	2.21982e-15	4.28722e-14	Disease resistance protein, Leucine-rich repeat domain superfamily, NB-ARC, P-loop containing nucleoside triphosphate hydrolase, Winged helix-like DNA-binding domain superfamily, plants	GO:0006952, GO:0043531
AeUmb.PI554389.v2.5U.G0026300	31.8283	8.84214	1.23658	7.1505	8.64602e-13	1.19201e-11	Apoptotic protease-activating factors, Disease resistance protein, Leucine-rich repeat domain superfamily, NB-ARC, P-loop containing nucleoside triphosphate hydrolase, Winged helix-like DNA-binding domain superfamily, helical domain, plants	GO:0006952, GO:0043531
AeUmb.PI554389.v2.5U.G0026500	289.53	3.12965	0.295285	10.5987	3.02049e-26	2.08579e-24
AeUmb.PI554389.v2.5U.G0026600	1098.01	1.88362	0.156371	12.0459	2.03893e-33	2.43729e-31
AeUmb.PI554389.v2.5U.G0026900	3.67515	4.31161	1.65995	2.59743	0.00939233	0.023002
AeUmb.PI554389.v2.5U.G0027000	165.866	1.61716	0.468324	3.45308	0.000554221	0.00185749
AeUmb.PI554389.v2.5U.G0027100	3085.07	0.798177	0.138601	5.7588	8.47119e-09	6.69339e-08	7TM region, CSC1/OSCA1-like, Calcium permeable stress-gated cation channel 1-like, N-terminal transmembrane domain, cytosolic domain	GO:0005227, GO:0016020
AeUmb.PI554389.v2.5U.G0027200	1052.21	0.78669	0.166581	4.72257	2.32885e-06	1.2516e-05	7TM region, CSC1/OSCA1-like, Calcium permeable stress-gated cation channel 1-like, N-terminal transmembrane domain, cytosolic domain	GO:0005227, GO:0016020
AeUmb.PI554389.v2.5U.G0028400	12.0334	-8.98869	1.5718	-5.71873	1.07324e-08	8.35457e-08	Aldolase-type TIM barrel, Alpha galactosidase, C-terminal beta sandwich domain, Glycoside hydrolase, Glycoside hydrolase family 27/36, Glycoside hydrolase superfamily, Glycosyl hydrolase, all-beta, conserved site, family 27	GO:0004553, GO:0005975
AeUmb.PI554389.v2.5U.G0030700	16.2027	-4.23246	1.12966	-3.74666	0.000179206	0.000664087
AeUmb.PI554389.v2.5U.G0030800	25.8962	3.89986	0.613008	6.36185	1.99342e-10	1.97763e-09
AeUmb.PI554389.v2.5U.G0030900	3969.66	0.206423	0.0891651	2.31507	0.0206091	0.0454399	C-terminal, L-lactate/malate dehydrogenase, Lactate dehydrogenase/glycoside hydrolase, Lactate/malate dehydrogenase, Malate dehydrogenase, N-terminal, NAD(P)-binding domain superfamily, active site, family 4, type 1	GO:0003824, GO:0006099, GO:0006108, GO:0016491, GO:0016615, GO:0016616, GO:0019752, GO:0030060
AeUmb.PI554389.v2.5U.G0031000	14073.6	0.977432	0.0996279	9.81083	1.01134e-22	4.6935e-21	C-terminal TIM barrel domain, C-terminal domain superfamily, Enolase, Enolase-like, N-terminal, conserved site	GO:0000015, GO:0000287, GO:0004634, GO:0006096
AeUmb.PI554389.v2.5U.G0032000	110.472	-1.14257	0.287671	-3.9718	7.1333e-05	0.000286658	ADP-ribosylation factor-like protein 2, ADP-ribosylation factor-like protein 2/3, ARF/SAR type, P-loop containing nucleoside triphosphate hydrolase, Small GTP-binding protein domain, Small GTPase superfamily	GO:0003924, GO:0005525
AeUmb.PI554389.v2.5U.G0032200	17.1622	1.56552	0.681424	2.29742	0.0215947	0.0472499
AeUmb.PI554389.v2.5U.G0032300	458.037	-0.485435	0.140879	-3.44576	0.000569446	0.00190346
AeUmb.PI554389.v2.5U.G0032600	255.277	-2.69793	0.279334	-9.65844	4.52689e-22	1.93839e-20	Protein transport Sec61-beta/Sbh, Protein transport protein SecG/Sec61-beta/Sbh	GO:0005784, GO:0006886
AeUmb.PI554389.v2.5U.G0037100	121.983	-1.06207	0.217672	-4.87921	1.06514e-06	6.06853e-06	Circularly permuted (CP)-type guanine nucleotide-binding (G) domain, GTP binding domain, GTP-binding protein, P-loop containing nucleoside triphosphate hydrolase, orthogonal bundle domain superfamily	GO:0005525
AeUmb.PI554389.v2.5U.G0037400	6.44078	-6.52611	1.71702	-3.80084	0.000144206	0.000544685	DNA helicase Pif1-like, Helitron helicase-like domain, P-loop containing nucleoside triphosphate hydrolase	GO:0000723, GO:0003678, GO:0006281
AeUmb.PI554389.v2.5U.G0037600	24.185	-3.00774	0.791614	-3.7995	0.000144988	0.00054738	Deoxyuridine triphosphate nucleotidohydrolase, dUTPase, dUTPase-like, dUTPase-like superfamily, trimeric	GO:0000287, GO:0004170, GO:0006226, GO:0046081
AeUmb.PI554389.v2.5U.G0038100	56.6657	9.56919	1.21017	7.90733	2.62959e-15	5.04465e-14
AeUmb.PI554389.v2.5U.G0038200	19.7521	8.04065	1.23616	6.50456	7.79233e-11	8.16978e-10
AeUmb.PI554389.v2.5U.G0038400	311.403	0.537072	0.187182	2.86926	0.00411439	0.0111271
AeUmb.PI554389.v2.5U.G0038800	99.3026	6.79607	0.618124	10.9947	4.05388e-28	3.26358e-26
AeUmb.PI554389.v2.5U.G0038900	290.421	1.50955	0.171968	8.77809	1.66278e-18	4.81544e-17
AeUmb.PI554389.v2.5U.G0039000	24.7226	8.60881	1.29148	6.66584	2.63159e-11	2.9607e-10
AeUmb.PI554389.v2.5U.G0039100	50.1159	9.16199	1.20473	7.60504	2.84819e-14	4.79377e-13	CRIB domain, CRIB domain superfamily, Rho GTPase-activating protein 1-5	GO:0005096
AeUmb.PI554389.v2.5U.G0039500	28.255	-9.16599	1.28085	-7.1562	8.29448e-13	1.14555e-11
AeUmb.PI554389.v2.5U.G0040400	203.185	3.41236	0.399284	8.54619	1.27218e-17	3.28001e-16	AAA+ ATPase domain, ABC transporter family G domain, ABC transporter-like, ABC-2 type transporter, ABC-transporter, ATP-binding cassette transporter, ATP-binding domain, N-terminal domain, P-loop containing nucleoside triphosphate hydrolase, PDR-like subfamily G, Plant PDR ABC transporter associated, domain 1, domain 2, transmembrane domain	GO:0005524, GO:0016020, GO:0016887, GO:0140359
AeUmb.PI554389.v2.5U.G0040700	57.1672	1.51715	0.450836	3.36519	0.000764914	0.00248115
AeUmb.PI554389.v2.5U.G0040900	1143.05	0.438936	0.159267	2.75597	0.00585175	0.0151555	DNA glycosylase, Methyl-CpG binding protein MeCP2/MBD4	GO:0003677, GO:0003824, GO:0006281
AeUmb.PI554389.v2.5U.G0041200	1910.97	5.67172	0.577505	9.82108	9.13612e-23	4.29044e-21	C-terminal domain, Isoprenoid synthase domain superfamily, N-terminal domain, N-terminal domain superfamily, Terpene cyclase-like 1, Terpene cyclases, Terpene synthase, Terpenoid cyclases/protein prenyltransferase alpha-alpha toroid, class 1, metal-binding domain, plant	GO:0000287, GO:0010333, GO:0016102, GO:0016829
AeUmb.PI554389.v2.5U.G0042200	26.1799	-9.26358	1.33772	-6.92493	4.3619e-12	5.47327e-11
AeUmb.PI554389.v2.5U.G0042300	680.292	5.9497	0.995879	5.97432	2.31051e-09	1.97763e-08
AeUmb.PI554389.v2.5U.G0043000	91.9575	-0.936808	0.382202	-2.45108	0.0142428	0.0330665
AeUmb.PI554389.v2.5U.G0043300	387.088	-0.662201	0.274052	-2.41633	0.0156778	0.0358997
AeUmb.PI554389.v2.5U.G0043400	25.2606	6.69589	1.34567	4.97587	6.49552e-07	3.83796e-06
AeUmb.PI554389.v2.5U.G0043500	175.286	-0.601112	0.22364	-2.68785	0.00719133	0.018189
AeUmb.PI554389.v2.5U.G0043600	54.2338	-1.84425	0.532783	-3.46155	0.000537081	0.00180541	PLC-like phosphodiesterase, TIM beta/alpha-barrel domain superfamily	GO:0006629, GO:0008081
AeUmb.PI554389.v2.5U.G0043700	16.9531	-8.29317	1.27134	-6.52319	6.88284e-11	7.28155e-10	PLC-like phosphodiesterase, TIM beta/alpha-barrel domain superfamily	GO:0006629, GO:0008081
AeUmb.PI554389.v2.5U.G0044300	132.891	3.02192	0.339088	8.91191	5.0159e-19	1.5413e-17	PLC-like phosphodiesterase, TIM beta/alpha-barrel domain superfamily	GO:0006629, GO:0008081
AeUmb.PI554389.v2.5U.G0044900	37.7417	1.1965	0.493898	2.42255	0.0154118	0.0353772
AeUmb.PI554389.v2.5U.G0046200	5.29885	-6.72004	1.90138	-3.53431	0.000408846	0.00140809	Autonomous transposable element EN-1 mosaic protein	GO:0032196
AeUmb.PI554389.v2.5U.G0046300	16.4344	-6.07371	1.33594	-4.54641	5.45683e-06	2.7404e-05	Armadillo-like helical, Armadillo-type fold, HEAT, Splicing factor 3B subunit 1, Splicing factor 3B subunit 1-like, TOG domain, type 2	GO:0000245, GO:0003729
AeUmb.PI554389.v2.5U.G0047900	9023.22	-0.327821	0.128157	-2.55797	0.0105286	0.0253866	Isoprenoid synthase domain superfamily, Squalene/phytoene synthase, Trans-isoprenyl diphosphate synthases, bacterial-type, conserved site, head-to-head	GO:0004311, GO:0009058, GO:0016765
AeUmb.PI554389.v2.5U.G0048100	16.974	3.22852	0.938297	3.44083	0.000579936	0.00193341
AeUmb.PI554389.v2.5U.G0048900	19.8053	7.19017	1.27905	5.62148	1.89329e-08	1.4221e-07
AeUmb.PI554389.v2.5U.G0049800	4.76963	5.96294	1.52891	3.90012	9.61465e-05	0.000377105
AeUmb.PI554389.v2.5U.G0050000	40.8614	1.97333	0.469295	4.20489	2.61211e-05	0.000114745
AeUmb.PI554389.v2.5U.G0050700	91.2328	1.91328	0.314568	6.08224	1.18513e-09	1.06221e-08	Aldolase-type TIM barrel, Pyruvate carboxyltransferase	GO:0003824
AeUmb.PI554389.v2.5U.G0051200	22731.3	-1.71562	0.201622	-8.50909	1.753e-17	4.43634e-16	Cysteine synthase, Cysteine synthase CysK, Cysteine synthase/cystathionine beta-synthase, PALP domain, PALP domain superfamily, Tryptophan synthase beta chain-like, pyridoxal-phosphate attachment site	GO:0004124, GO:0006535
AeUmb.PI554389.v2.5U.G0051900	14.7055	6.68848	1.25137	5.34493	9.04544e-08	6.10732e-07
AeUmb.PI554389.v2.5U.G0052600	154.542	-0.911477	0.201617	-4.52083	6.15965e-06	3.05928e-05	Domain unknown function DUF295, F-box domain, F-box-like domain superfamily	GO:0005515
AeUmb.PI554389.v2.5U.G0053000	4.8432	4.19547	1.48328	2.82851	0.00467654	0.0124374	Armadillo-type fold, MT-associated protein TORTIFOLIA1/SPIRAL2-like	GO:0005874, GO:0008017
AeUmb.PI554389.v2.5U.G0053400	115.222	3.86568	0.588683	6.56665	5.14599e-11	5.52935e-10	Domain unknown function DUF295, F-box domain, F-box-like domain superfamily	GO:0005515
AeUmb.PI554389.v2.5U.G0053700	34.9347	7.47433	1.24691	5.99429	2.04375e-09	1.76461e-08	Domain unknown function DUF295, F-box domain, F-box-like domain superfamily	GO:0005515
AeUmb.PI554389.v2.5U.G0053800	8.73407	2.97533	0.885433	3.36031	0.000778538	0.00252068
AeUmb.PI554389.v2.5U.G0054600	5.75383	-4.53492	1.67994	-2.69946	0.00694527	0.0176515
AeUmb.PI554389.v2.5U.G0056100	33.4457	6.5314	0.91274	7.15581	8.31783e-13	1.14827e-11
AeUmb.PI554389.v2.5U.G0056900	620.943	0.273127	0.114382	2.38784	0.0169475	0.0384079	C-terminal domain superfamily, Folylpolyglutamate synthetase, Mur ligase, Mur-like, catalytic domain superfamily, central, conserved site	GO:0004326, GO:0005524, GO:0009058, GO:0009396, GO:0016881
AeUmb.PI554389.v2.5U.G0057000	33.4481	5.81999	0.896234	6.49382	8.36857e-11	8.74261e-10
AeUmb.PI554389.v2.5U.G0057200	2180.24	0.68875	0.231697	2.97262	0.00295266	0.00828339	Amino acid/polyamine transporter I, C-terminal, Cationic amino acid transporter	GO:0016020, GO:0022857, GO:0055085
AeUmb.PI554389.v2.5U.G0057400	28.0586	7.87114	1.23	6.39931	1.56084e-10	1.57119e-09
AeUmb.PI554389.v2.5U.G0057500	36.6306	8.23029	1.20791	6.81368	9.5132e-12	1.13978e-10
AeUmb.PI554389.v2.5U.G0057700	521.075	12.1675	1.1861	10.2584	1.08438e-24	6.3138e-23
AeUmb.PI554389.v2.5U.G0057900	44.8326	-9.17579	1.2412	-7.39269	1.43891e-13	2.18839e-12	3'-5' exonuclease domain, Ribonuclease H superfamily, Ribonuclease H-like superfamily	GO:0003676, GO:0006139, GO:0008408
AeUmb.PI554389.v2.5U.G0058300	26.4361	-8.25316	1.23219	-6.69798	2.11319e-11	2.40838e-10
AeUmb.PI554389.v2.5U.G0058500	221.1	0.790764	0.324119	2.43973	0.0146981	0.0339935	NAD(P)-binding domain, NAD(P)-binding domain superfamily, RmlD-like substrate binding domain, dTDP-glucose 4,6-dehydratase	GO:0008460, GO:0009225
AeUmb.PI554389.v2.5U.G0058600	28.5446	3.29253	0.839424	3.92237	8.76808e-05	0.000346139
AeUmb.PI554389.v2.5U.G0058700	324.309	11.6959	1.18816	9.84369	7.29818e-23	3.44269e-21
AeUmb.PI554389.v2.5U.G0058800	316.1	11.9197	1.19087	10.0093	1.38759e-23	7.13183e-22
AeUmb.PI554389.v2.5U.G0059800	5.76625	6.57915	2.30189	2.85815	0.00426118	0.0114583
AeUmb.PI554389.v2.5U.G0061400	413.744	-0.523948	0.175583	-2.98404	0.00284467	0.00800964	High mobility group box domain superfamily, YABBY protein	GO:0007275
AeUmb.PI554389.v2.5U.G0061900	4.31932	-3.98894	1.5037	-2.65276	0.0079837	0.0199469
AeUmb.PI554389.v2.5U.G0062100	14.9959	5.46316	1.23041	4.44012	8.99103e-06	4.3187e-05
AeUmb.PI554389.v2.5U.G0062200	58.4583	4.44776	0.466985	9.52442	1.65972e-21	6.7323e-20
AeUmb.PI554389.v2.5U.G0062300	69.2173	3.216	0.355964	9.03461	1.64595e-19	5.4051e-18
AeUmb.PI554389.v2.5U.G0062700	121.481	1.82898	0.284827	6.42135	1.3507e-10	1.37456e-09
AeUmb.PI554389.v2.5U.G0063300	76.0257	7.26427	0.766461	9.47768	2.6e-21	1.03469e-19	Apoptotic protease-activating factors, Disease resistance protein, Leucine-rich repeat domain superfamily, N-terminal, NB-ARC, P-loop containing nucleoside triphosphate hydrolase, Rx, Virus X resistance protein-like, Winged helix-like DNA-binding domain superfamily, coiled-coil domain, helical domain, plants	GO:0006952, GO:0043531
AeUmb.PI554389.v2.5U.G0064300	8.26713	6.86385	1.41128	4.86355	1.15298e-06	6.5219e-06
AeUmb.PI554389.v2.5U.G0064700	80.8666	4.57847	0.637883	7.1776	7.09445e-13	9.8672e-12	AAA-type, ATPase, P-loop containing nucleoside triphosphate hydrolase, conserved site, core	GO:0005524, GO:0016887
AeUmb.PI554389.v2.5U.G0066300	50.5053	7.34164	1.08129	6.78972	1.1235e-11	1.32991e-10	Disease resistance protein, Leucine-rich repeat domain superfamily, N-terminal, NB-ARC, P-loop containing nucleoside triphosphate hydrolase, Rx, Winged helix-like DNA-binding domain superfamily, plants	GO:0006952, GO:0043531
AeUmb.PI554389.v2.5U.G0066400	73.7181	8.99706	1.22927	7.319	2.49817e-13	3.68055e-12	Apoptotic protease-activating factors, Disease resistance protein, Leucine-rich repeat domain superfamily, NB-ARC, P-loop containing nucleoside triphosphate hydrolase, Protein of unknown function DUF674, Winged helix-like DNA-binding domain superfamily, helical domain, plants	GO:0006952, GO:0043531
AeUmb.PI554389.v2.5U.G0066500	57.6554	7.95217	1.21635	6.53772	6.24625e-11	6.65269e-10
AeUmb.PI554389.v2.5U.G0067200	40.3986	-2.40765	0.609223	-3.95199	7.75026e-05	0.000308972	N-terminal, NB-ARC, P-loop containing nucleoside triphosphate hydrolase, Rx	GO:0043531
AeUmb.PI554389.v2.5U.G0067300	1004.4	-0.803541	0.181055	-4.43809	9.07603e-06	4.35291e-05	Acyl-coenzyme A thioesterase 13, HotDog domain superfamily, Phenylacetic acid degradation-related domain, Thioesterase domain	GO:0047617
AeUmb.PI554389.v2.5U.G0067400	109.932	0.68312	0.274696	2.48682	0.0128891	0.0302982	F-box domain, F-box-like domain superfamily, Leucine-rich repeat domain superfamily	GO:0005515
AeUmb.PI554389.v2.5U.G0067600	341.161	0.461678	0.197527	2.33729	0.0194244	0.0431809	EF-hand binding site, IQ motif	GO:0005515
AeUmb.PI554389.v2.5U.G0068000	2781.18	0.835425	0.189893	4.39945	1.08526e-05	5.12476e-05	NAD(P)-binding domain superfamily, Short-chain dehydrogenase/reductase, Short-chain dehydrogenase/reductase SDR, Tropinone reductase, conserved site	GO:0016491
AeUmb.PI554389.v2.5U.G0068100	1127.12	0.597623	0.116065	5.14902	2.61852e-07	1.65298e-06	Glycosyl transferase, Glycosyltransferase BC10-like, family 14	GO:0016020, GO:0016757
AeUmb.PI554389.v2.5U.G0068200	92.7298	-1.25155	0.306632	-4.08158	4.473e-05	0.000187387	CCAAT-binding factor, Nuclear transcription factor Y subunit A, conserved site	GO:0003677, GO:0003700, GO:0006355, GO:0016602
AeUmb.PI554389.v2.5U.G0068800	128.527	-2.40337	0.396886	-6.05557	1.39923e-09	1.2421e-08	HMA, Heavy metal-associated domain, Heavy metal-associated domain superfamily, Heavy-metal-associated, conserved site	GO:0046872
AeUmb.PI554389.v2.5U.G0069100	202.682	-1.35596	0.228588	-5.93189	2.99469e-09	2.52962e-08	C-terminal, GTP binding domain, N-terminal helical domain, NOG, NOG1, Nucleolar GTP-binding protein 1, OBG-type guanine nucleotide-binding (G) domain, P-loop containing nucleoside triphosphate hydrolase, Rossman-fold domain	GO:0005525
AeUmb.PI554389.v2.5U.G0069300	506.635	-0.927907	0.303565	-3.0567	0.00223789	0.00646142	Beta-glucanase, Beta-glucanase/XTH, C-terminal, Concanavalin A-like lectin/glucanase domain superfamily, Glycoside hydrolase family 16, Xyloglucan endo-transglycosylase, Xyloglucan endotransglucosylase/hydrolase	GO:0004553, GO:0005618, GO:0005975, GO:0010411, GO:0016762, GO:0042546, GO:0044042, GO:0048046
AeUmb.PI554389.v2.5U.G0070400	3632.79	0.294386	0.0979813	3.00451	0.0026601	0.00754041	C-terminal domain, Pyruvate dehydrogenase E1 component subunit beta, Thiamin diphosphate-binding fold, Transketolase, Transketolase C-terminal/Pyruvate-ferredoxin oxidoreductase domain II, Transketolase-like, pyrimidine-binding domain	GO:0003824, GO:0004739, GO:0006086
AeUmb.PI554389.v2.5U.G0071100	521.751	-1.36187	0.225053	-6.05133	1.43652e-09	1.27092e-08
AeUmb.PI554389.v2.5U.G0071200	805.611	-0.604062	0.160334	-3.76753	0.000164872	0.000615961	PA clan, Peptidase S1, Peptidase S1C, chymotrypsin-like fold	GO:0004252, GO:0006508
AeUmb.PI554389.v2.5U.G0071300	67.4546	-1.25102	0.375059	-3.33552	0.000851407	0.00272862
AeUmb.PI554389.v2.5U.G0071800	504.201	0.465619	0.152358	3.05608	0.00224249	0.00647173	Eukaryotic translation initiation factor 3 subunit B, Papain-like cysteine peptidase superfamily, Translation initiation factor, WD40/YVTN repeat-like-containing domain superfamily, beta propellor-like domain	GO:0003723, GO:0003743, GO:0005515, GO:0005852, GO:0006413, GO:0031369
AeUmb.PI554389.v2.5U.G0071900	459.686	0.85791	0.182034	4.71291	2.44205e-06	1.30731e-05
AeUmb.PI554389.v2.5U.G0073000	13.9407	2.16059	0.709561	3.04496	0.00232711	0.00668661	E motif, Pentatricopeptide repeat, Pentatricopeptide repeat-containing protein At4g14850-like, Tetratricopeptide-like helical domain superfamily, plant	GO:0003723, GO:0005515, GO:0009451
AeUmb.PI554389.v2.5U.G0073500	671.737	-0.769312	0.183538	-4.19157	2.77026e-05	0.000121136
AeUmb.PI554389.v2.5U.G0073700	206.697	-1.1678	0.230941	-5.05668	4.26618e-07	2.59357e-06	Large ribosomal subunit protein uL14, Large ribosomal subunit protein uL14 superfamily, bacterial-type, conserved site	GO:0003735, GO:0005840, GO:0006412, GO:0015934
AeUmb.PI554389.v2.5U.G0074800	28.0202	8.56145	1.23354	6.94056	3.9056e-12	4.94198e-11
AeUmb.PI554389.v2.5U.G0075900	67.9528	-2.14247	0.45142	-4.74607	2.07402e-06	1.12422e-05
AeUmb.PI554389.v2.5U.G0076200	20.2005	2.99672	0.652047	4.59587	4.30953e-06	2.20565e-05	Pentatricopeptide repeat, Tetratricopeptide-like helical domain superfamily	GO:0005515
AeUmb.PI554389.v2.5U.G0076300	28.1833	4.29826	0.862946	4.98091	6.32854e-07	3.74454e-06	Multi antimicrobial extrusion protein, Multidrug and toxic compound extrusion family, eukaryotic	GO:0015297, GO:0016020, GO:0042910, GO:0055085, GO:1990961
AeUmb.PI554389.v2.5U.G0076400	18.7656	7.86027	1.24678	6.30444	2.89235e-10	2.80593e-09
AeUmb.PI554389.v2.5U.G0076500	372.112	3.25025	0.346192	9.38858	6.08153e-21	2.32632e-19	Cytochrome P450, Cytochrome P450 superfamily, E-class, conserved site, group I	GO:0004497, GO:0005506, GO:0016705, GO:0020037
AeUmb.PI554389.v2.5U.G0076800	15.0161	6.2831	1.26431	4.96959	6.70934e-07	3.95615e-06	Ureide permease, plant	GO:0016020, GO:0022857, GO:0071705
AeUmb.PI554389.v2.5U.G0076900	9.4191	6.63725	1.45295	4.56812	4.92124e-06	2.49285e-05
AeUmb.PI554389.v2.5U.G0077000	9.85106	7.03406	1.39317	5.04895	4.44251e-07	2.69402e-06
AeUmb.PI554389.v2.5U.G0077100	16.0647	-3.23027	0.820544	-3.93674	8.25948e-05	0.000327741
AeUmb.PI554389.v2.5U.G0077600	871.915	-2.48435	0.24771	-10.0293	1.13323e-23	5.91113e-22
AeUmb.PI554389.v2.5U.G0077700	128.923	8.97217	1.19617	7.50075	6.34552e-14	1.01496e-12	Deoxyuridine triphosphate nucleotidohydrolase, dUTPase-like	GO:0000287, GO:0004170, GO:0006226, GO:0046081
AeUmb.PI554389.v2.5U.G0077800	36.7273	2.89139	0.506915	5.70389	1.17101e-08	9.06195e-08
AeUmb.PI554389.v2.5U.G0078100	9.23293	7.26195	1.50797	4.81572	1.46667e-06	8.13879e-06
AeUmb.PI554389.v2.5U.G0078600	26.4733	2.15883	0.63973	3.3746	0.00073923	0.00240501
AeUmb.PI554389.v2.5U.G0079600	257.18	-0.711932	0.234545	-3.03537	0.00240243	0.00688779	ATP binding site, EGF-like calcium-binding, EGF-like calcium-binding domain, Protein kinase, Protein kinase domain, Protein kinase-like domain superfamily, Receptor-like kinase WAK-like, Serine/threonine-protein kinase, Wall-associated receptor kinase, active site, conserved site, galacturonan-binding domain	GO:0004672, GO:0005509, GO:0005524, GO:0006468, GO:0007166, GO:0030247
AeUmb.PI554389.v2.5U.G0079800	528.765	-0.913001	0.163369	-5.58858	2.28927e-08	1.69788e-07	C-terminal, MYND-type, Programmed cell death protein 2, Zinc finger	GO:0005737
AeUmb.PI554389.v2.5U.G0079900	210.61	-2.42085	0.280423	-8.63285	5.98439e-18	1.60865e-16
AeUmb.PI554389.v2.5U.G0080900	63.5824	-3.31424	0.370318	-8.94972	3.5639e-19	1.12133e-17
AeUmb.PI554389.v2.5U.G0081400	6336.15	-4.58837	0.135201	-33.9373	1.87992e-252	5.93265e-248	Peptidase S8, Peptidase S8/S53 domain, Peptidase S8/S53 domain superfamily, Ser-active site, Subtilisin-like protease, fibronectin type-III domain, subtilisin	GO:0004252, GO:0006508, GO:0008236
AeUmb.PI554389.v2.5U.G0081500	1595.5	-3.57156	0.359819	-9.92598	3.20928e-23	1.57509e-21	Peptidase S8, Peptidase S8 propeptide/proteinase inhibitor I9, Peptidase S8 propeptide/proteinase inhibitor I9 superfamily, Peptidase S8/S53 domain, Peptidase S8/S53 domain superfamily, Subtilisin-like protease, subtilisin-related	GO:0004252, GO:0006508, GO:0008236
AeUmb.PI554389.v2.5U.G0082000	26.6211	5.13464	0.827868	6.20225	5.56629e-10	5.22334e-09
AeUmb.PI554389.v2.5U.G0083200	148.426	-1.25079	0.414578	-3.01702	0.00255277	0.00727341	Apoptotic protease-activating factors, Disease resistance protein, Leucine-rich repeat domain superfamily, N-terminal, NB-ARC, P-loop containing nucleoside triphosphate hydrolase, Rx, Winged helix-like DNA-binding domain superfamily, helical domain, plants	GO:0006952, GO:0043531
AeUmb.PI554389.v2.5U.G0083400	132.855	-1.81207	0.263404	-6.87941	6.00993e-12	7.37983e-11
AeUmb.PI554389.v2.5U.G0083500	134.978	-4.6551	0.893986	-5.20712	1.91791e-07	1.23521e-06	Kinesin motor domain, Kinesin motor domain superfamily, Kinesin-like protein KIF15/KIN-12, P-loop containing nucleoside triphosphate hydrolase	GO:0003777, GO:0005524, GO:0007018, GO:0008017
AeUmb.PI554389.v2.5U.G0084400	2247.04	-0.644361	0.158337	-4.06955	4.71039e-05	0.000196135
AeUmb.PI554389.v2.5U.G0085000	11.7871	-2.38289	0.864304	-2.75701	0.00583334	0.0151177	F-box-like domain superfamily, FBD domain, Leucine-rich repeat domain superfamily	GO:0005515
AeUmb.PI554389.v2.5U.G0085200	1386.84	-1.32941	0.21766	-6.10774	1.0105e-09	9.14525e-09	MFS transporter superfamily, Proton-dependent oligopeptide transporter family	GO:0016020, GO:0022857, GO:0055085
AeUmb.PI554389.v2.5U.G0085400	1038.76	-0.849104	0.298451	-2.84503	0.00444066	0.0118862	Large ribosomal subunit protein eL36, Large ribosomal subunit protein eL36 domain superfamily	GO:0003735, GO:0005840, GO:0006412
AeUmb.PI554389.v2.5U.G0085500	139.901	-0.910038	0.362603	-2.50974	0.0120821	0.0286422	AUX/IAA domain, Auxin response factor, Auxin response factor domain, B3 DNA binding domain, DNA-binding pseudobarrel domain superfamily, PB1 domain	GO:0003677, GO:0005515, GO:0005634, GO:0006355, GO:0009725
AeUmb.PI554389.v2.5U.G0085700	648.871	0.752113	0.175283	4.29085	1.77989e-05	8.06574e-05	Sec1-like, Sec1-like protein, Sec1-like superfamily, domain 1, domain 2, domain 3a	GO:0016192
AeUmb.PI554389.v2.5U.G0086500	1740.47	-0.906087	0.168114	-5.38971	7.05718e-08	4.83312e-07	Sugar transporter SWEET, Sugar transporter SWEET repeat	GO:0016020, GO:0051119
AeUmb.PI554389.v2.5U.G0086900	24.9843	1.83187	0.521659	3.51162	0.000445383	0.00152346	CCHC-type, CCHC-type superfamily, Zinc finger	GO:0003676, GO:0008270
AeUmb.PI554389.v2.5U.G0087000	41.462	3.89287	0.660764	5.89147	3.82776e-09	3.19145e-08
AeUmb.PI554389.v2.5U.G0087100	248.717	2.10255	0.214211	9.81532	9.67273e-23	4.50889e-21
AeUmb.PI554389.v2.5U.G0087200	420.138	0.961538	0.244669	3.92995	8.49648e-05	0.000336511	Glycoside hydrolase family 17, Glycoside hydrolase superfamily, X8 domain, plant	GO:0004553, GO:0005975
AeUmb.PI554389.v2.5U.G0087700	110.463	10.0226	1.19443	8.39107	4.81736e-17	1.15785e-15	F-box domain, F-box protein, F-box-like domain superfamily, Leucine-rich repeat domain superfamily, plant	GO:0005515
AeUmb.PI554389.v2.5U.G0087800	11.0072	7.12697	1.36737	5.21216	1.86654e-07	1.2041e-06
AeUmb.PI554389.v2.5U.G0088200	551.673	-0.438408	0.172861	-2.53618	0.0112068	0.0268049	C-terminal, LIS1 homology motif, Srp40	GO:0005515
AeUmb.PI554389.v2.5U.G0088400	92.889	-1.16457	0.266039	-4.37745	1.20073e-05	5.62124e-05
AeUmb.PI554389.v2.5U.G0089200	797.079	1.65925	0.136446	12.1605	5.04314e-34	6.29057e-32	PA clan, PDZ domain 6, PDZ superfamily, Peptidase S1, Peptidase S1C	GO:0004252, GO:0005515, GO:0006508
AeUmb.PI554389.v2.5U.G0090300	710.004	0.279633	0.104852	2.66693	0.0076547	0.0192333	CCZ1/INTU/HSP4, Vacuolar fusion protein Ccz1, first Longin domain	GO:0016192, GO:0035658
AeUmb.PI554389.v2.5U.G0090900	10.1545	6.39557	1.33853	4.77805	1.77007e-06	9.69958e-06
AeUmb.PI554389.v2.5U.G0091000	9.89166	6.6001	1.31606	5.01506	5.30169e-07	3.17779e-06
AeUmb.PI554389.v2.5U.G0091200	31.1195	4.12374	1.05838	3.89629	9.76789e-05	0.00038245
AeUmb.PI554389.v2.5U.G0091400	105.518	5.20693	0.966218	5.38898	7.08596e-08	4.85073e-07
AeUmb.PI554389.v2.5U.G0091800	17.6936	7.92102	1.31163	6.03907	1.55006e-09	1.36334e-08
AeUmb.PI554389.v2.5U.G0092200	9.0063	3.19012	1.17726	2.70979	0.00673268	0.0171832
AeUmb.PI554389.v2.5U.G0092300	3.24097	4.38	1.60695	2.72565	0.00641745	0.0164438
AeUmb.PI554389.v2.5U.G0093600	114.714	-0.890935	0.335094	-2.65876	0.00784281	0.0196416	G-protein beta WD-40 repeat, WD40 repeat, WD40-repeat-containing domain superfamily, WD40/YVTN repeat-like-containing domain superfamily, conserved site	GO:0005515
AeUmb.PI554389.v2.5U.G0093700	129.545	5.12005	0.505164	10.1354	3.84739e-24	2.10426e-22
AeUmb.PI554389.v2.5U.G0094300	480.971	-0.786395	0.156004	-5.04086	4.63456e-07	2.80133e-06	CCAAT-binding factor, Nuclear transcription factor Y subunit A, conserved site	GO:0003677, GO:0003700, GO:0006355, GO:0016602
AeUmb.PI554389.v2.5U.G0094500	248.871	-0.842985	0.25805	-3.26675	0.00108789	0.00339313	Class III homeodomain-leucine zipper family, Homeobox domain, Homeobox-like domain superfamily, MEKHLA, START domain, START-like domain superfamily	GO:0003677, GO:0003700, GO:0008289
AeUmb.PI554389.v2.5U.G0094600	156.024	-1.4229	0.262373	-5.42319	5.85442e-08	4.07126e-07	Nucleic acid-binding, OB-fold, Small ribosomal subunit protein uS17, bacteria/chloroplast	GO:0003735, GO:0005840, GO:0006412
AeUmb.PI554389.v2.5U.G0095200	47.9353	8.22227	1.23127	6.67788	2.42418e-11	2.7381e-10	UDP-glucuronosyl/UDP-glucosyltransferase	GO:0008194
AeUmb.PI554389.v2.5U.G0095800	216.584	1.72517	0.503934	3.4234	0.000618434	0.00204769
AeUmb.PI554389.v2.5U.G0095900	283.478	2.26583	0.534174	4.24174	2.21792e-05	9.87765e-05
AeUmb.PI554389.v2.5U.G0096100	135.377	-5.36325	1.39772	-3.83715	0.000124472	0.000476596	Cupin 1, Germin, RmlC-like cupin domain superfamily, RmlC-like jelly roll fold, manganese binding site	GO:0030145
AeUmb.PI554389.v2.5U.G0096300	106.606	-1.50316	0.419155	-3.58616	0.000335587	0.0011762	Small ribosomal subunit protein bS21	GO:0003735, GO:0005840, GO:0006412
AeUmb.PI554389.v2.5U.G0096400	128.607	-0.717174	0.30838	-2.32562	0.0200391	0.0443411	Pentatricopeptide repeat, Pentatricopeptide repeat-containing protein At4g14850-like, Tetratricopeptide-like helical domain superfamily, plant	GO:0003723, GO:0005515, GO:0009451
AeUmb.PI554389.v2.5U.G0096800	667.429	1.83905	0.45156	4.07265	4.64808e-05	0.000193776
AeUmb.PI554389.v2.5U.G0097200	193.905	-1.03785	0.238685	-4.34821	1.37255e-05	6.35957e-05	DNA methylase, Methyltransferase HemK-like, Methyltransferase small domain, N-6 adenine-specific, S-adenosyl-L-methionine-dependent methyltransferase superfamily, conserved site	GO:0003676, GO:0006479, GO:0008168, GO:0008276, GO:0008757, GO:0032259
AeUmb.PI554389.v2.5U.G0097500	750.274	-0.554771	0.144161	-3.84827	0.000118954	0.000457351
AeUmb.PI554389.v2.5U.G0097600	240.321	-0.577884	0.253334	-2.28112	0.0225416	0.0489956
AeUmb.PI554389.v2.5U.G0097800	2532.09	-0.591968	0.183787	-3.22095	0.00127768	0.00391923	Amine oxidase, FAD/NAD(P)-binding domain superfamily, Protoporphyrinogen oxidase	GO:0004729, GO:0006779, GO:0016491
AeUmb.PI554389.v2.5U.G0098200	2290.09	-0.470046	0.12284	-3.82649	0.000129982	0.000495888	GDP-L-galactose/GDP-D-glucose phosphorylase	GO:0080048
AeUmb.PI554389.v2.5U.G0098300	10.5864	6.72886	1.43892	4.67632	2.92073e-06	1.54032e-05
AeUmb.PI554389.v2.5U.G0098500	322.056	-0.630974	0.172043	-3.66754	0.000244893	0.000882934
AeUmb.PI554389.v2.5U.G0098700	9.12982	-7.36081	1.60839	-4.5765	4.7282e-06	2.402e-05	CCHC-type superfamily, DNA/RNA polymerase superfamily, Domain of unknown function DUF4219, GAG-pre-integrase domain, Integrase, RNA-dependent DNA polymerase, Reverse transcriptase, Ribonuclease H superfamily, Ribonuclease H-like superfamily, Zinc finger, catalytic core	GO:0003676, GO:0008270, GO:0015074
AeUmb.PI554389.v2.5U.G0100800	980.447	-1.03023	0.217717	-4.73194	2.22386e-06	1.19885e-05	Acyl transferase/acyl hydrolase/lysophospholipase, Patatin-like phospholipase domain	GO:0006629
AeUmb.PI554389.v2.5U.G0101000	16.7228	5.12562	0.92118	5.56419	2.63369e-08	1.93468e-07
AeUmb.PI554389.v2.5U.G0101200	3.01637	-5.43103	1.62056	-3.35132	0.000804269	0.00259308
AeUmb.PI554389.v2.5U.G0101300	65.7607	2.35368	0.334301	7.04061	1.91399e-12	2.5241e-11
AeUmb.PI554389.v2.5U.G0102400	3.97221	6.60041	1.72833	3.81894	0.000134025	0.000509649	Auxin response factor, DNA-binding pseudobarrel domain superfamily	GO:0003677, GO:0006355, GO:0009725
AeUmb.PI554389.v2.5U.G0102500	33.0263	8.71431	1.24684	6.98914	2.76573e-12	3.57415e-11
AeUmb.PI554389.v2.5U.G0103200	157.62	-0.564626	0.237139	-2.38099	0.0172661	0.0390262
AeUmb.PI554389.v2.5U.G0103300	11.7137	-2.84247	0.769885	-3.69207	0.000222433	0.000809823	Aminotransferase-like, Protein MAINTENANCE OF MERISTEMS-like, Protein of unknown function DUF724, plant mobile domain	GO:0010073, GO:0048507
AeUmb.PI554389.v2.5U.G0104000	4.29443	26.8702	7.06046	3.80573	0.000141386	0.000535253
AeUmb.PI554389.v2.5U.G0105000	2.03768	4.77522	1.96731	2.42729	0.0152121	0.0349926
AeUmb.PI554389.v2.5U.G0105100	32.1476	5.58963	0.972267	5.74907	8.97381e-09	7.064e-08
AeUmb.PI554389.v2.5U.G0105300	271.129	-0.832638	0.321788	-2.58753	0.00966663	0.0235913	ATP binding site, Protein kinase, Protein kinase domain, Protein kinase-like domain superfamily, Serine-threonine/tyrosine-protein kinase, Serine/threonine-protein kinase, active site, catalytic domain	GO:0004672, GO:0005524, GO:0006468
AeUmb.PI554389.v2.5U.G0105900	1267.24	-1.73458	0.155532	-11.1526	6.95671e-29	6.06464e-27	NAC domain, NAC domain superfamily	GO:0003677, GO:0006355
AeUmb.PI554389.v2.5U.G0106100	167.322	-1.11441	0.227942	-4.88898	1.01358e-06	5.79781e-06	Methyltransferase domain, S-adenosyl-L-methionine-dependent methyltransferase superfamily	GO:0008757
AeUmb.PI554389.v2.5U.G0106200	267.548	-0.629196	0.273004	-2.30472	0.0211824	0.0464928
AeUmb.PI554389.v2.5U.G0106400	21.0043	7.20254	1.31337	5.48401	4.15785e-08	2.96796e-07	Disease resistance protein, N-terminal, NB-ARC, P-loop containing nucleoside triphosphate hydrolase, Rx, Winged helix-like DNA-binding domain superfamily, plants	GO:0006952, GO:0043531
AeUmb.PI554389.v2.5U.G0106500	8.29458	3.02616	0.990906	3.05394	0.00225859	0.00651284
AeUmb.PI554389.v2.5U.G0106800	140.529	10.2336	1.08935	9.39427	5.76162e-21	2.21198e-19	PA clan, PDZ domain, PDZ domain 6, PDZ superfamily, Peptidase S1	GO:0005515
AeUmb.PI554389.v2.5U.G0106900	3952.91	1.1914	0.435275	2.73713	0.0061978	0.0159574	Basic helix-loop-helix (bHLH) transcription factors ALC-like, Helix-loop-helix DNA-binding domain superfamily, Myc-type, Transcription factor PIF1-like, basic helix-loop-helix (bHLH) domain, basic helix-loop-helix domain, plant	GO:0046983
AeUmb.PI554389.v2.5U.G0108000	13.8498	-6.94454	1.41218	-4.9176	8.76106e-07	5.07026e-06	NSF attachment protein, Tetratricopeptide-like helical domain superfamily	GO:0005515, GO:0006886
AeUmb.PI554389.v2.5U.G0108100	25.4577	8.1154	1.23791	6.55573	5.53687e-11	5.92716e-10
AeUmb.PI554389.v2.5U.G0108200	6.33719	6.16395	1.34408	4.586	4.51809e-06	2.3064e-05
AeUmb.PI554389.v2.5U.G0108700	48.63	9.05339	1.20388	7.52015	5.47132e-14	8.84096e-13
AeUmb.PI554389.v2.5U.G0108800	76.9391	1.96423	0.339642	5.78324	7.32755e-09	5.85425e-08
AeUmb.PI554389.v2.5U.G0109000	169.712	1.38454	0.302681	4.57425	4.77939e-06	2.42489e-05	ATP binding site, Gnk2-homologous domain, Gnk2-homologous domain superfamily, Protein kinase, Protein kinase domain, Protein kinase-like domain superfamily, Serine/threonine-protein kinase, active site	GO:0004672, GO:0005524, GO:0006468
AeUmb.PI554389.v2.5U.G0109100	476.468	0.521058	0.199495	2.61188	0.00900448	0.0221812	ATP binding site, Gnk2-homologous domain, Gnk2-homologous domain superfamily, Protein kinase, Protein kinase domain, Protein kinase-like domain superfamily, Serine/threonine-protein kinase, active site	GO:0004672, GO:0005524, GO:0006468
AeUmb.PI554389.v2.5U.G0109600	44.4044	1.74155	0.518881	3.35636	0.000789747	0.00255174
AeUmb.PI554389.v2.5U.G0109700	417.064	1.16157	0.290979	3.99193	6.55383e-05	0.000265434	ATP binding site, Gnk2-homologous domain, Gnk2-homologous domain superfamily, Protein kinase, Protein kinase domain, Protein kinase-like domain superfamily, Serine/threonine-protein kinase, active site	GO:0004672, GO:0005524, GO:0006468
AeUmb.PI554389.v2.5U.G0109800	10.7442	6.14434	1.17571	5.22604	1.73175e-07	1.12311e-06
AeUmb.PI554389.v2.5U.G0109900	6.83591	7.24649	1.48811	4.8696	1.11824e-06	6.34589e-06	Wall-associated receptor kinase, galacturonan-binding domain	GO:0030247
AeUmb.PI554389.v2.5U.G0110000	26.9552	5.81278	0.892612	6.51211	7.41033e-11	7.8108e-10	ATP binding site, Protein kinase, Protein kinase domain, Protein kinase-like domain superfamily, Serine/threonine-protein kinase, active site	GO:0004672, GO:0005524, GO:0006468
AeUmb.PI554389.v2.5U.G0110500	375.069	3.0358	0.182831	16.6044	6.47583e-62	3.2962e-59	C-terminal domain superfamily, Ku70, Ku70/Ku80, Ku70/Ku80 C-terminal arm, Ku70/Ku80 beta-barrel domain, N-terminal alpha/beta, SAP domain, SAP domain superfamily, SPOC-like, bridge and pillars domain superfamily, core domain, von Willebrand factor A-like domain superfamily	GO:0000723, GO:0003677, GO:0003678, GO:0003684, GO:0005634, GO:0006303, GO:0042162, GO:0043564
AeUmb.PI554389.v2.5U.G0111100	140.731	10.5304	1.19015	8.84796	8.91343e-19	2.6764e-17
AeUmb.PI554389.v2.5U.G0111200	452.358	12.3939	1.18575	10.4524	1.42892e-25	9.12831e-24
AeUmb.PI554389.v2.5U.G0111600	23.7746	5.52714	1.06221	5.20343	1.95645e-07	1.25875e-06	Piwi domain, Ribonuclease H superfamily, Ribonuclease H-like superfamily, Ubiquitin-like domain, Ubiquitin-like domain superfamily	GO:0003676, GO:0005515
AeUmb.PI554389.v2.5U.G0111700	36.2597	1.10363	0.400107	2.75834	0.00580954	0.015066	Argonaute, Argonaute linker 2 domain, Argonaute-like, Mid domain, N-terminal, PAZ domain, PAZ domain superfamily, PIWI domain, Piwi domain, Protein argonaute, Ribonuclease H superfamily, Ribonuclease H-like superfamily, linker 1 domain	GO:0003676, GO:0003723, GO:0005515
AeUmb.PI554389.v2.5U.G0112000	45.9077	-9.70904	1.22948	-7.89686	2.8602e-15	5.45391e-14
AeUmb.PI554389.v2.5U.G0112800	19.933	-8.23586	1.40549	-5.85977	4.63501e-09	3.8211e-08	ATP binding site, Protein kinase, Protein kinase domain, Protein kinase-like domain superfamily, Serine/threonine-protein kinase, active site	GO:0004672, GO:0005524, GO:0006468
AeUmb.PI554389.v2.5U.G0113100	42.0779	9.09627	1.21801	7.46815	8.13274e-14	1.27943e-12
AeUmb.PI554389.v2.5U.G0113500	48.8786	3.11938	0.849378	3.67255	0.000240147	0.000867157	Histone H2A/H2B/H3, Histone H2B, Histone-fold	GO:0000786, GO:0003677, GO:0030527, GO:0046982
AeUmb.PI554389.v2.5U.G0114000	3980.01	-0.289182	0.101823	-2.84004	0.00451075	0.0120462	Rhodanese-like domain, Rhodanese-like domain superfamily, Sulfurtransferase TST/MPST-like, Thiosulphate sulfurtransferase, conserved site	GO:0004792, GO:0016783
AeUmb.PI554389.v2.5U.G0115200	54.2427	5.92104	0.693938	8.53253	1.43186e-17	3.67072e-16
AeUmb.PI554389.v2.5U.G0115300	22.9984	5.09005	0.769891	6.61138	3.80746e-11	4.17934e-10	ATP binding site, Protein kinase, Protein kinase domain, Protein kinase-like domain superfamily, Serine/threonine-protein kinase, active site	GO:0004672, GO:0005524, GO:0006468
AeUmb.PI554389.v2.5U.G0115500	57.5876	2.23462	0.507558	4.40269	1.06919e-05	5.05717e-05
AeUmb.PI554389.v2.5U.G0115600	17.6522	7.43765	1.27379	5.83898	5.25214e-09	4.29619e-08	ATP binding site, Protein kinase, Protein kinase domain, Protein kinase-like domain superfamily, Serine/threonine-protein kinase, active site	GO:0004672, GO:0005524, GO:0006468
AeUmb.PI554389.v2.5U.G0115700	810.984	13.048	1.17988	11.0587	1.98944e-28	1.64784e-26
AeUmb.PI554389.v2.5U.G0115800	7.49388	5.91488	1.37047	4.31595	1.5892e-05	7.25999e-05	Papain-like cysteine peptidase superfamily, Peptidase C19, Ubiquitin carboxyl-terminal hydrolase 14-like, Ubiquitin specific protease, Ubiquitin specific protease domain, conserved site, ubiquitin carboxyl-terminal hydrolase	GO:0004843, GO:0016579, GO:0043161
AeUmb.PI554389.v2.5U.G0116000	5.66068	5.39247	1.61573	3.33749	0.000845402	0.00271103
AeUmb.PI554389.v2.5U.G0116100	38.9339	4.4739	0.648698	6.89673	5.32123e-12	6.59315e-11
AeUmb.PI554389.v2.5U.G0116200	3.90492	4.76494	1.54856	3.07702	0.00209083	0.0060847
AeUmb.PI554389.v2.5U.G0116300	9.91735	3.42513	1.01712	3.36749	0.000758558	0.00246206	ATP binding site, Protein kinase, Protein kinase domain, Protein kinase-like domain superfamily, Serine/threonine-protein kinase, active site	GO:0004672, GO:0005524, GO:0006468
AeUmb.PI554389.v2.5U.G0116500	40.7534	3.60836	0.467778	7.71381	1.22112e-14	2.14925e-13
AeUmb.PI554389.v2.5U.G0116600	20.4099	6.90198	1.21211	5.69421	1.23948e-08	9.55899e-08	ATP binding site, Protein kinase, Protein kinase domain, Protein kinase-like domain superfamily, Serine/threonine-protein kinase, active site	GO:0004672, GO:0005524, GO:0006468
AeUmb.PI554389.v2.5U.G0117000	3.71549	5.92445	1.6992	3.48661	0.000489179	0.00165639
AeUmb.PI554389.v2.5U.G0117400	3783.16	1.57112	0.176713	8.89077	6.06869e-19	1.85039e-17	Actin-crosslinking, Fascin, Glycoside hydrolase, Glycoside hydrolase superfamily, conserved site, family 5	GO:0004553, GO:0005975, GO:0007015, GO:0051015, GO:0071704
AeUmb.PI554389.v2.5U.G0117500	8.94665	-6.55149	1.64987	-3.97091	7.15996e-05	0.000287619
AeUmb.PI554389.v2.5U.G0117900	1689.89	0.713945	0.13682	5.21812	1.80747e-07	1.16838e-06	BHMT, Betaine-homocysteine S-methyltransferase, Homocysteine-binding domain, Homocysteine-binding domain superfamily	GO:0008168, GO:0008270, GO:0009086
AeUmb.PI554389.v2.5U.G0118200	145.509	1.60907	0.220613	7.29364	3.0169e-13	4.40979e-12	C-terminal catalytic domain, Papain-like cysteine peptidase superfamily, Ulp1 protease family	GO:0006508, GO:0008234
AeUmb.PI554389.v2.5U.G0118300	2.53851	-5.88312	2.54341	-2.31309	0.0207179	0.045632
AeUmb.PI554389.v2.5U.G0120100	930.709	1.64344	0.294595	5.57865	2.42392e-08	1.79143e-07	Alpha/Beta hydrolase fold, Alpha/beta hydrolase fold-1, Epoxide hydrolase-like	GO:0003824
AeUmb.PI554389.v2.5U.G0120200	2735.8	0.783496	0.313264	2.50107	0.0123819	0.0292542	ATP-binding domain, ATP-grasp fold, BT domain, Biotin carboxylase, Biotin carboxylase-like, Biotin carboxylation domain, Biotin-binding site, Biotin/lipoyl attachment, C-terminal, Carbamoyl-phosphate synthetase large subunit-like, Methylcrotonoyl-CoA carboxylase subunit alpha, N-terminal domain, Pre-ATP-grasp domain superfamily, Rudiment single hybrid motif, Single hybrid motif	GO:0005524, GO:0046872
AeUmb.PI554389.v2.5U.G0120400	96.0251	0.886317	0.328367	2.69916	0.00695138	0.0176642	F-box-like domain superfamily	GO:0005515
AeUmb.PI554389.v2.5U.G0120900	460.989	-0.474091	0.15534	-3.05197	0.00227348	0.00655039	CRC domain, CRC domain-containing protein TSO1-like, Tesmin/TSO1-like CXC domain	GO:0003700
AeUmb.PI554389.v2.5U.G0121600	17.8518	-8.27969	1.32026	-6.27125	3.58151e-10	3.42501e-09
AeUmb.PI554389.v2.5U.G0121700	4266.39	-1.24284	0.0963204	-12.9032	4.32021e-38	6.81685e-36
AeUmb.PI554389.v2.5U.G0122500	513.64	12.2262	1.18698	10.3003	7.02774e-25	4.19247e-23	CCHC-type, CCHC-type superfamily, Zinc finger	GO:0003676, GO:0008270
AeUmb.PI554389.v2.5U.G0122700	159.608	8.78562	1.03338	8.50183	1.86631e-17	4.71176e-16
AeUmb.PI554389.v2.5U.G0123400	11.2982	4.65176	1.40699	3.30617	0.000945816	0.00299619
AeUmb.PI554389.v2.5U.G0123700	534.451	12.2264	1.181	10.3526	4.07131e-25	2.51926e-23	Armadillo-like helical, Armadillo-type fold, Importin beta family, Importin-beta, N-terminal domain	GO:0006606, GO:0006886, GO:0031267
AeUmb.PI554389.v2.5U.G0123900	347.028	11.7008	1.18676	9.85951	6.23526e-23	2.97239e-21	Armadillo-like helical, Armadillo-type fold, Importin beta family, Importin-beta, N-terminal domain	GO:0006606, GO:0006886, GO:0031267
AeUmb.PI554389.v2.5U.G0124200	105.878	8.94589	1.19289	7.49933	6.41442e-14	1.02494e-12
AeUmb.PI554389.v2.5U.G0124300	6.0449	5.78869	1.33853	4.32467	1.52764e-05	7.00409e-05
AeUmb.PI554389.v2.5U.G0124400	19.0392	7.88941	1.26414	6.24091	4.35031e-10	4.12397e-09
AeUmb.PI554389.v2.5U.G0125000	233.671	-5.18617	0.356541	-14.5458	6.21359e-48	1.6478e-45	GB1/RHD3-type guanine nucleotide-binding (G) domain, P-loop containing nucleoside triphosphate hydrolase, RHD3/Sey1, Sey1/RHD3-like, three-helix bundle domain	GO:0005525
AeUmb.PI554389.v2.5U.G0125900	173.466	-3.08205	0.335692	-9.18118	4.26396e-20	1.48687e-18
AeUmb.PI554389.v2.5U.G0126300	81.4819	-10.0005	1.20114	-8.32588	8.37049e-17	1.93947e-15
AeUmb.PI554389.v2.5U.G0126500	244.328	0.754612	0.20321	3.71347	0.000204439	0.000748107	Glycosyltransferase 61	GO:0016757
AeUmb.PI554389.v2.5U.G0127100	48.8548	-9.16349	1.21447	-7.54525	4.51423e-14	7.38517e-13
AeUmb.PI554389.v2.5U.G0127500	572.897	9.45883	1.19194	7.93564	2.09419e-15	4.057e-14
AeUmb.PI554389.v2.5U.G0127600	2065.3	-0.630284	0.127415	-4.94669	7.54871e-07	4.40907e-06	Aldo-keto reductase, L-galactose dehydrogenase-like, NADP-dependent oxidoreductase domain, NADP-dependent oxidoreductase domain superfamily	GO:0010349, GO:0016491
AeUmb.PI554389.v2.5U.G0127700	434.335	-1.28023	0.317943	-4.0266	5.65886e-05	0.000232136	Cytochrome P450, Cytochrome P450 superfamily, E-class, conserved site, group I	GO:0004497, GO:0005506, GO:0016705, GO:0020037
AeUmb.PI554389.v2.5U.G0128200	297.465	-0.793318	0.288795	-2.74699	0.00601449	0.0155412
AeUmb.PI554389.v2.5U.G0128300	314.75	-1.36302	0.331969	-4.10587	4.02802e-05	0.000170329	EF-Hand 1, EF-hand domain, EF-hand domain pair, calcium-binding site	GO:0005509
AeUmb.PI554389.v2.5U.G0129100	88.0008	-2.25821	0.966663	-2.33609	0.0194868	0.0433042	Alpha/Beta hydrolase fold, Alpha/beta hydrolase fold-3	GO:0016787
AeUmb.PI554389.v2.5U.G0129400	78.1895	-1.59373	0.601574	-2.64926	0.00806674	0.0201337	ATP binding site, NAF domain, NAF/FISL domain, Protein kinase, Protein kinase domain, Protein kinase-like domain superfamily, Serine/threonine-protein kinase, active site	GO:0004672, GO:0005524, GO:0006468, GO:0007165
AeUmb.PI554389.v2.5U.G0129700	22.6391	8.11818	1.2594	6.44605	1.14805e-10	1.18037e-09
AeUmb.PI554389.v2.5U.G0129800	6.81068	-8.46332	2.83615	-2.98409	0.00284423	0.00800912	Invertase/pectin methylesterase inhibitor domain superfamily, Pectinesterase inhibitor domain	GO:0004857
AeUmb.PI554389.v2.5U.G0129900	9.19695	6.75783	1.5948	4.23741	2.2611e-05	0.000100501
AeUmb.PI554389.v2.5U.G0131000	4871.86	-0.342972	0.104963	-3.26754	0.00108486	0.00338502
AeUmb.PI554389.v2.5U.G0131200	108.46	0.879866	0.259834	3.38626	0.000708528	0.00231443	E3 ubiquitin protein ligase DRIP1-like, RING-type, RING/FYVE/PHD-type, Zinc finger, conserved site	GO:0004842
AeUmb.PI554389.v2.5U.G0132000	7.16776	-5.48015	1.45931	-3.7553	0.000173137	0.000643943	ATPase, Heat shock protein 70, Heat shock protein 70 family, conserved site, nucleotide binding domain	GO:0005524, GO:0140662
AeUmb.PI554389.v2.5U.G0133500	796.153	0.406324	0.167015	2.43285	0.0149804	0.0345401	Aldolase-type TIM barrel, Elp3/MiaA/NifB-like, MoaA/NifB/PqqE, Molybdenum cofactor biosynthesis protein A, Molybdenum cofactor biosynthesis protein A-like, Radical SAM, conserved site, iron-sulphur binding, radical SAM core domain, twitch domain	GO:0003824, GO:0006777, GO:0019008, GO:0046872, GO:0051536, GO:0051539
AeUmb.PI554389.v2.5U.G0134000	244.906	3.18041	0.270839	11.7428	7.69021e-32	8.48559e-30
AeUmb.PI554389.v2.5U.G0134400	7.31908	-7.35674	1.80928	-4.06611	4.78046e-05	0.000198895
AeUmb.PI554389.v2.5U.G0134500	361.281	-1.66322	0.329507	-5.04761	4.47363e-07	2.71185e-06
AeUmb.PI554389.v2.5U.G0135300	469.075	-0.761891	0.200294	-3.80387	0.000142452	0.000539031	WRKY domain, WRKY domain superfamily, WRKY transcription factor, Zn-cluster domain, plant	GO:0003700, GO:0006355, GO:0043565
AeUmb.PI554389.v2.5U.G0135600	18.1936	4.74702	1.25178	3.79223	0.0001493	0.00056243
AeUmb.PI554389.v2.5U.G0136000	1544.76	-0.626301	0.121688	-5.14678	2.65001e-07	1.67024e-06
AeUmb.PI554389.v2.5U.G0136100	163.591	-0.771906	0.259651	-2.97286	0.00295043	0.0082779
AeUmb.PI554389.v2.5U.G0136200	406.465	-1.06878	0.215653	-4.956	7.19596e-07	4.22493e-06	Large ribosomal subunit protein bL27	GO:0003735, GO:0005840, GO:0006412
AeUmb.PI554389.v2.5U.G0136300	441.514	0.533211	0.192712	2.76689	0.00565944	0.0147123	Mpv17/PMP22	GO:0016020
AeUmb.PI554389.v2.5U.G0136600	5.40007	-6.68521	1.68814	-3.96011	7.49149e-05	0.000299489	DNA/RNA polymerase superfamily, Integrase, Integrase zinc-binding domain, RNase H-like domain, Reverse transcriptase, Ribonuclease H superfamily, Ribonuclease H-like superfamily, catalytic core	GO:0003676, GO:0015074
AeUmb.PI554389.v2.5U.G0137900	6.7623	-2.65905	1.15499	-2.30223	0.0213221	0.0467475	F-box domain, F-box-like domain superfamily	GO:0005515
AeUmb.PI554389.v2.5U.G0138100	69.5516	-1.11721	0.306729	-3.64232	0.000270188	0.000964655
AeUmb.PI554389.v2.5U.G0138400	4.51509	-2.88847	1.10481	-2.61445	0.00893704	0.0220357
AeUmb.PI554389.v2.5U.G0138600	2026.52	-0.373682	0.117598	-3.17763	0.00148484	0.00447681
AeUmb.PI554389.v2.5U.G0138700	70.6927	-1.60066	0.452386	-3.53825	0.000402781	0.00138887	RING-H2 finger protein ATL1/ATL16-like, RING-type, RING/FYVE/PHD-type, Zinc finger	GO:0016567, GO:0016740
AeUmb.PI554389.v2.5U.G0138800	95.4883	-0.640062	0.277263	-2.3085	0.0209713	0.0460872	Biotinyl protein ligase (BPL) and lipoyl protein ligase (LPL), Class II Aminoacyl-tRNA synthetase/Biotinyl protein ligase (BPL) and lipoyl protein ligase (LPL), Octanoyltransferase, catalytic domain	GO:0009249, GO:0033819, GO:0036211
AeUmb.PI554389.v2.5U.G0138900	414.797	-0.609487	0.193938	-3.1427	0.001674	0.00498034	ATP binding site, LEAF RUST 10 DISEASE-RESISTANCE LOCUS RECEPTOR-LIKE PROTEIN KINASE-like 1.1/1.2/1.3/1.4/1.5, Protein kinase, Protein kinase domain, Protein kinase-like domain superfamily, Serine-threonine/tyrosine-protein kinase, Serine/threonine-protein kinase, Wall-associated receptor kinase, active site, catalytic domain, galacturonan-binding domain	GO:0004672, GO:0005524, GO:0006468, GO:0030247
AeUmb.PI554389.v2.5U.G0139300	583.142	-2.98062	0.305489	-9.75689	1.72363e-22	7.75953e-21
AeUmb.PI554389.v2.5U.G0140500	877.111	-1.09017	0.122967	-8.86551	7.61514e-19	2.29531e-17	Sirohydrochlorin cobaltochelatase CbiX-like	GO:0016829
AeUmb.PI554389.v2.5U.G0140800	40.619	5.79735	0.855139	6.77942	1.20658e-11	1.42133e-10
AeUmb.PI554389.v2.5U.G0140900	372.18	-1.59025	0.369174	-4.30758	1.65052e-05	7.51617e-05	G-protein beta WD-40 repeat, Protein JINGUBANG-like, WD40 repeat, WD40-repeat-containing domain superfamily, WD40/YVTN repeat-like-containing domain superfamily	GO:0005515
AeUmb.PI554389.v2.5U.G0141000	1431.56	-0.920939	0.257572	-3.57546	0.000349613	0.00122047	Cytochrome P450, Cytochrome P450 superfamily, E-class, conserved site, group I	GO:0004497, GO:0005506, GO:0016705, GO:0020037
AeUmb.PI554389.v2.5U.G0141300	971.613	-1.2279	0.149175	-8.2313	1.85195e-16	4.10131e-15	FYVE/PHD-type, G protein alpha subunit, Guanine nucleotide binding protein (G-protein), P-loop containing nucleoside triphosphate hydrolase, Zinc finger, alpha subunit, helical insertion	GO:0003924, GO:0007165, GO:0007186, GO:0019001, GO:0031683
AeUmb.PI554389.v2.5U.G0141500	51.1378	7.71034	1.20704	6.38778	1.68306e-10	1.68616e-09	Protein kinase domain, Protein kinase-like domain superfamily, Serine/threonine-protein kinase, active site	GO:0004672, GO:0005524, GO:0006468
AeUmb.PI554389.v2.5U.G0141700	622.115	-1.0124	0.225672	-4.48613	7.25281e-06	3.54419e-05
AeUmb.PI554389.v2.5U.G0142700	128.394	1.74282	0.470167	3.70682	0.000209877	0.00076685
AeUmb.PI554389.v2.5U.G0143000	30.3402	-2.23974	0.44647	-5.01655	5.26067e-07	3.1538e-06	B3 DNA binding domain, B3 domain-containing protein REM16-like, DNA-binding pseudobarrel domain superfamily	GO:0003677
AeUmb.PI554389.v2.5U.G0143600	4.47365	-6.48104	1.764	-3.67405	0.000238733	0.000862896
AeUmb.PI554389.v2.5U.G0143900	16.1647	-1.39854	0.552615	-2.53076	0.0113815	0.0271796
AeUmb.PI554389.v2.5U.G0144100	385.077	-0.609523	0.174525	-3.49247	0.000478571	0.00162413
AeUmb.PI554389.v2.5U.G0144700	198.496	-0.96715	0.209674	-4.61264	3.97587e-06	2.05017e-05	B3 DNA binding domain, B3 domain-containing protein REM16-like, DNA-binding pseudobarrel domain superfamily	GO:0003677
AeUmb.PI554389.v2.5U.G0145000	31.0898	-8.91257	1.23808	-7.19872	6.07783e-13	8.52842e-12	B3 DNA binding domain, B3 domain-containing protein REM16-like, DNA-binding pseudobarrel domain superfamily	GO:0003677
AeUmb.PI554389.v2.5U.G0145100	49.2253	-10.0366	1.28318	-7.82162	5.21462e-15	9.62357e-14	CCHC-type, CCHC-type superfamily, Domain of unknown function DUF4283, Zinc finger	GO:0003676, GO:0008270
AeUmb.PI554389.v2.5U.G0145300	24.0503	4.04994	0.774263	5.23071	1.68862e-07	1.09649e-06	Apoptotic protease-activating factors, Disease resistance protein, Leucine-rich repeat domain superfamily, N-terminal, NB-ARC, P-loop containing nucleoside triphosphate hydrolase, Rx, Winged helix-like DNA-binding domain superfamily, helical domain, plants	GO:0006952, GO:0043531
AeUmb.PI554389.v2.5U.G0145500	103.563	-0.920646	0.345397	-2.66547	0.00768809	0.0193031	B3 DNA binding domain, B3 domain-containing protein REM16-like, DNA-binding pseudobarrel domain superfamily	GO:0003677
AeUmb.PI554389.v2.5U.G0145800	294.075	-0.76081	0.315612	-2.41059	0.0159269	0.0363927	B3 DNA binding domain, B3 domain-containing protein REM16-like, DNA-binding pseudobarrel domain superfamily	GO:0003677
AeUmb.PI554389.v2.5U.G0145900	48.0729	5.3933	0.615334	8.76483	1.87057e-18	5.38116e-17
AeUmb.PI554389.v2.5U.G0146000	230.981	5.60959	0.446205	12.5718	3.01847e-36	4.32986e-34
AeUmb.PI554389.v2.5U.G0147000	57.7128	1.52128	0.364503	4.17356	2.99876e-05	0.000130208	F-box-like domain superfamily, FBD domain, Leucine-rich repeat domain superfamily	GO:0005515
AeUmb.PI554389.v2.5U.G0147200	88.4064	-7.38417	0.769237	-9.59934	8.04548e-22	3.35402e-20
AeUmb.PI554389.v2.5U.G0147700	207.677	-0.674512	0.182776	-3.69038	0.00022392	0.000814672
[truncated: 14,205 more rows]

## Sheet: U89I24_vs_U17I24
Gene	baseMean	log2FoldChange	lfcSE	stat	pvalue	padj	interpro_description	go
[truncated: 15,074 more rows]

## Sheet: U89I72_vs_U17I72
Gene	baseMean	log2FoldChange	lfcSE	stat	pvalue	padj	interpro_description	go
[truncated: 14,939 more rows]

[truncated: 9 more sheets: U89M6_vs_U17M6, U89M24_vs_U17M24, U89M72_vs_U17M72, U17I6_vs_U17M6, U17I24_vs_U17M24, U17I72_vs_U17M72, U89I6_vs_U89M6, U89I24_vs_U89M24, U89I72_vs_U89M72]
